# Supplementary material for: Genetics of trans-regulatory variation in gene expression
Source: PubMed Central journal article supplement (PMC6072440; doi:10.7554/elife.35471), 2018-07-17

# chrI:48890\_C/T; 455 genes affected

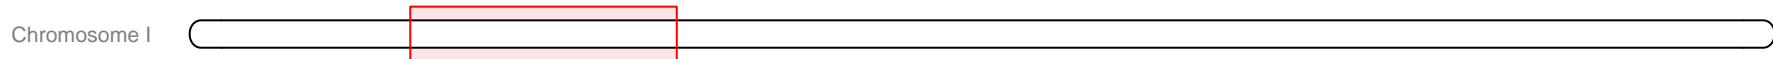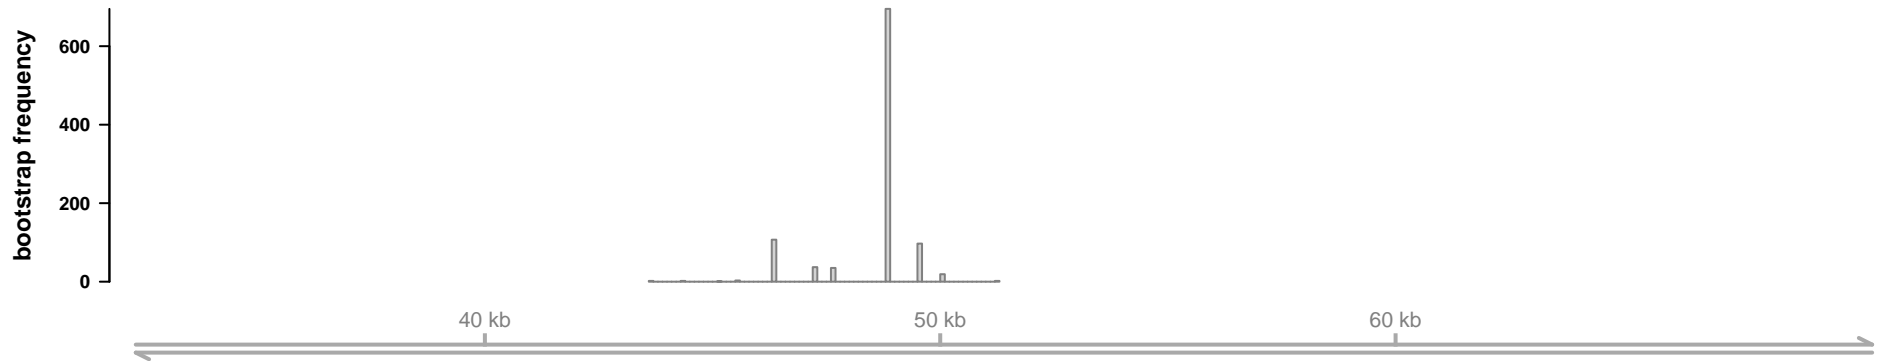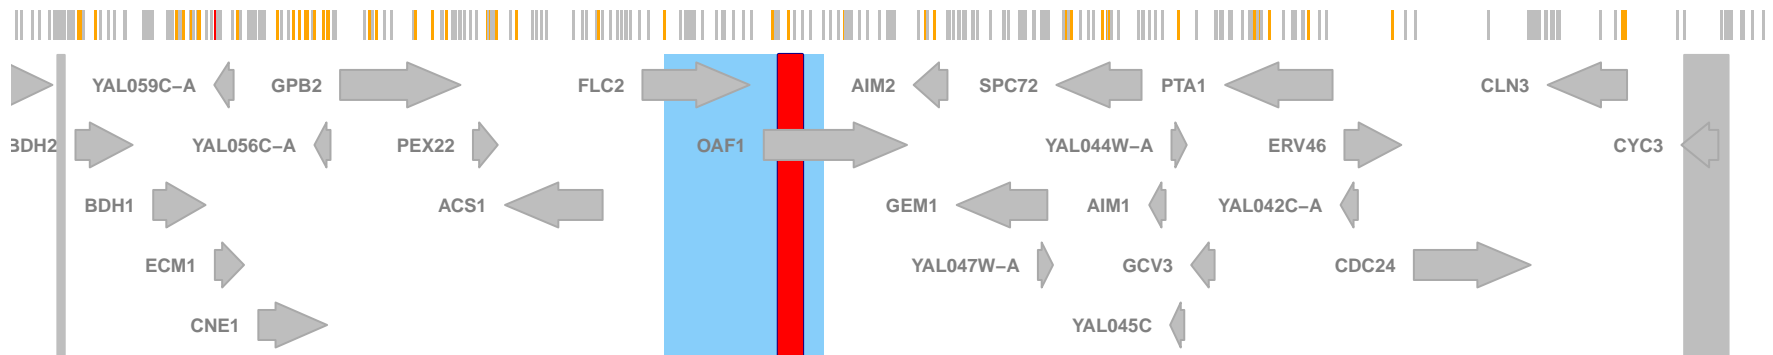

# chr1:109735\_A/G; 162 genes affected

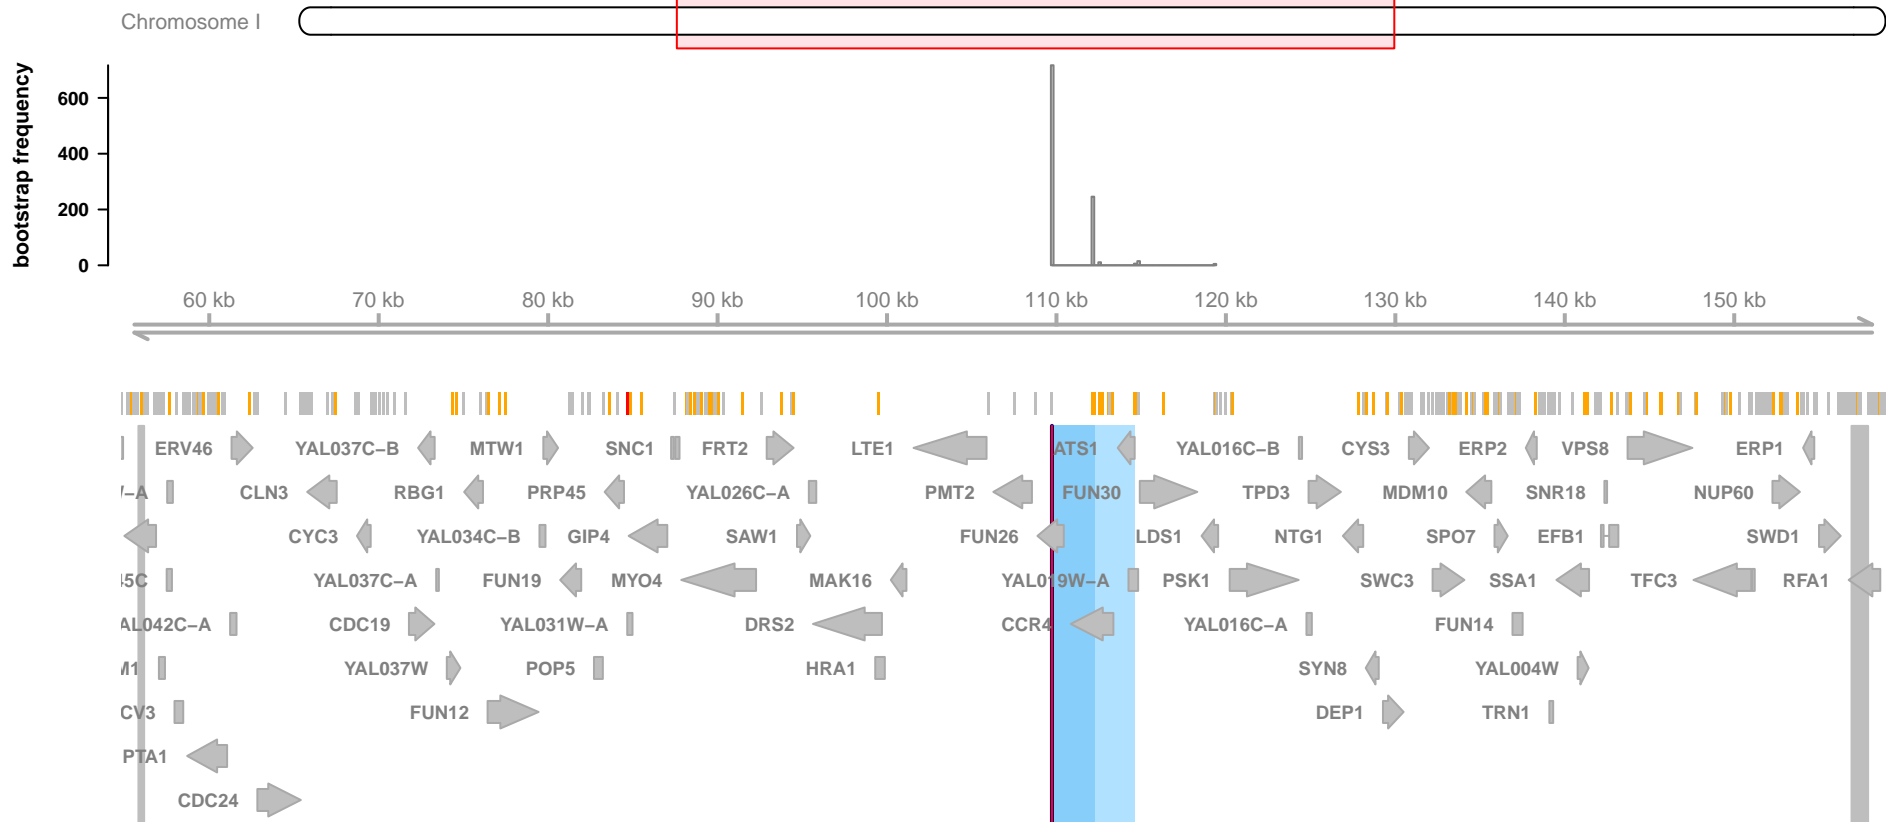

# chr1:159467\_G/A; 265 genes affected

Chromosome I

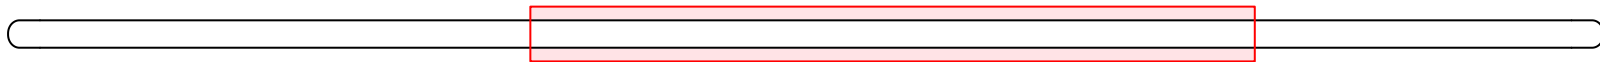

bootstrap frequency

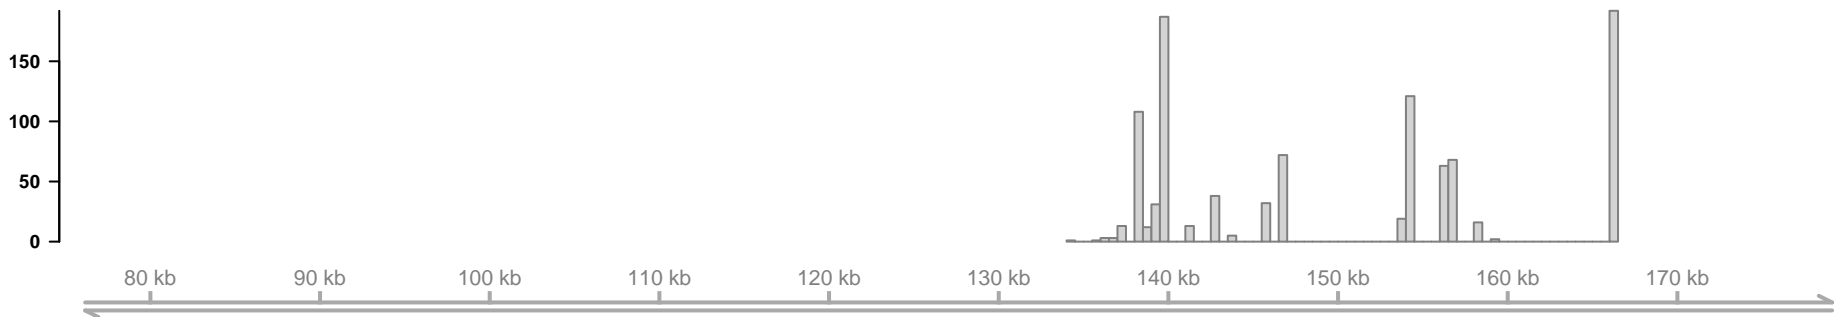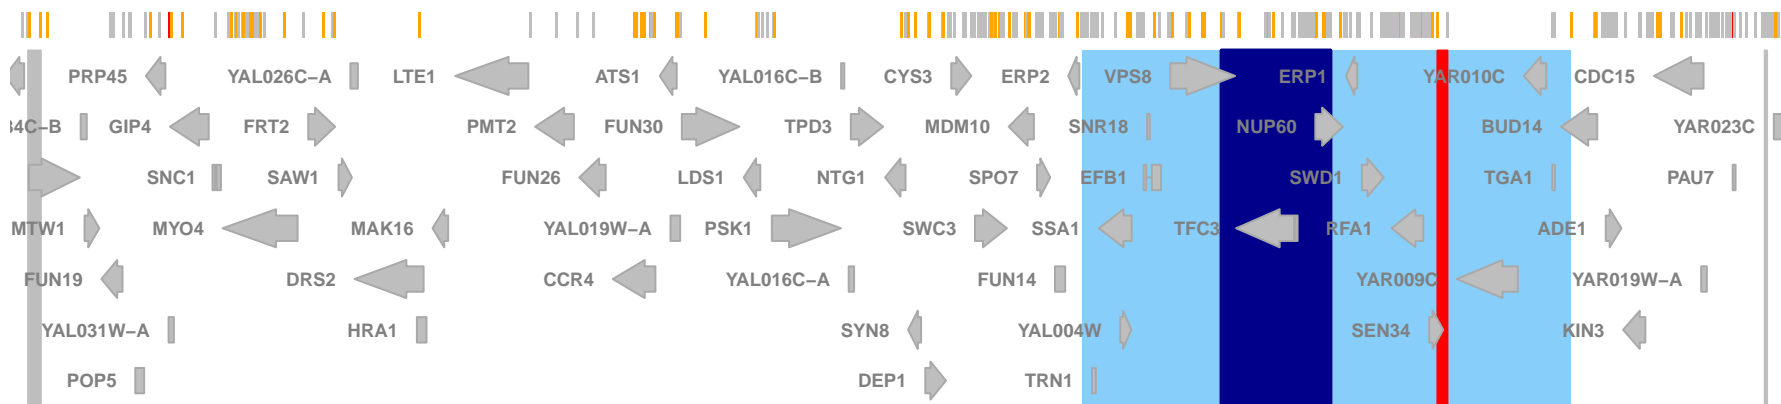

# chr1:189123\_C/T; 45 genes affected

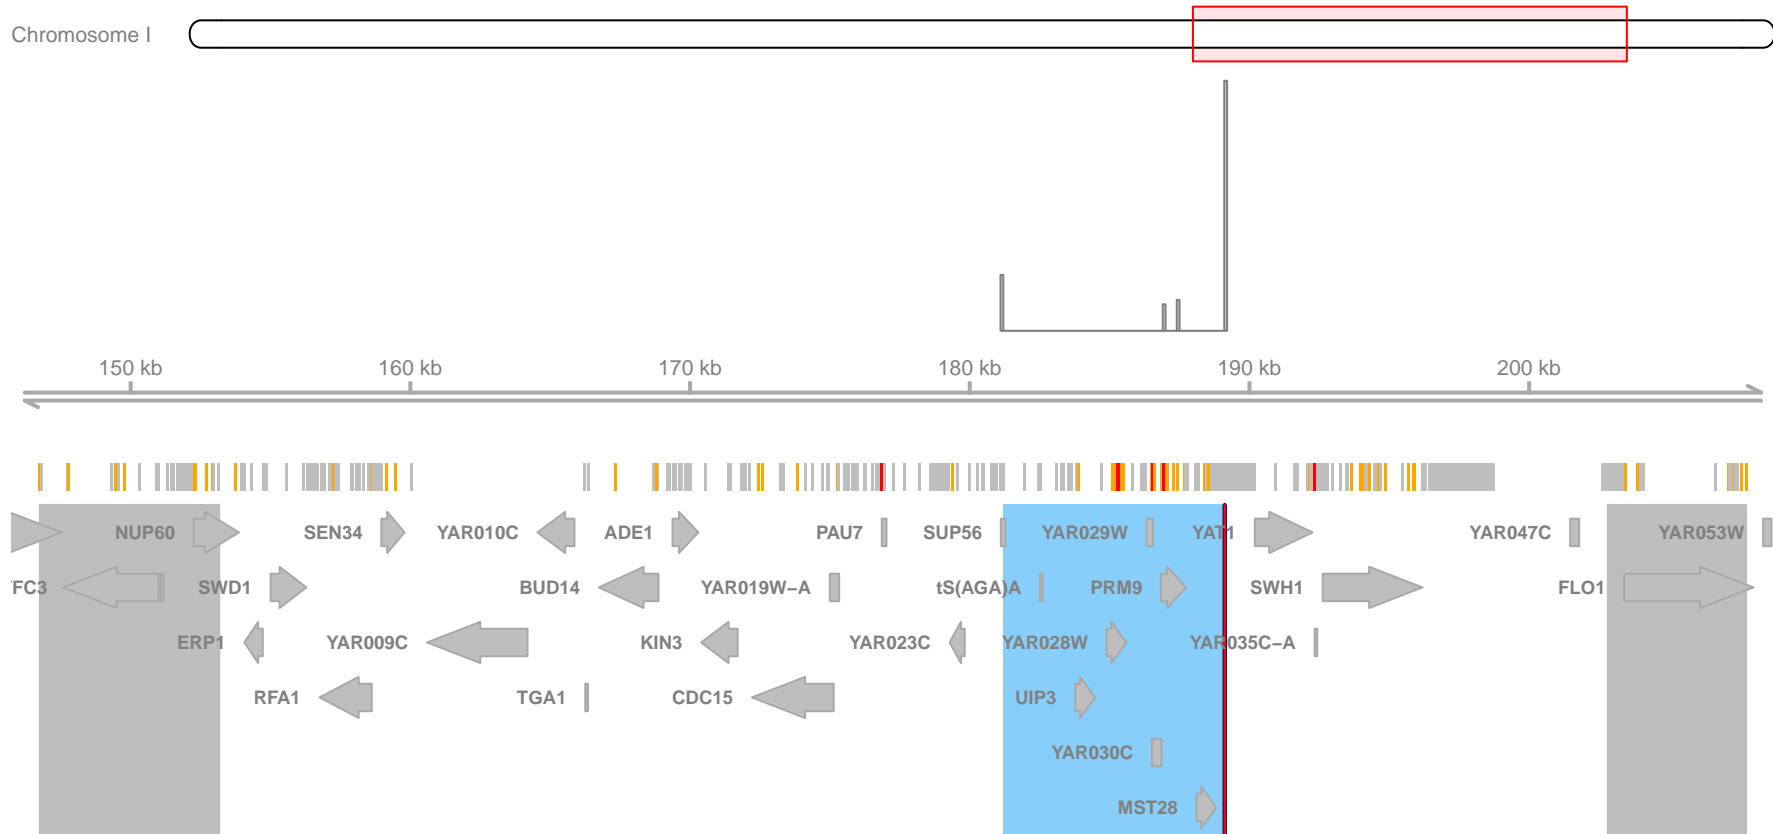

# chrII:13061\_G/T; 69 genes affected

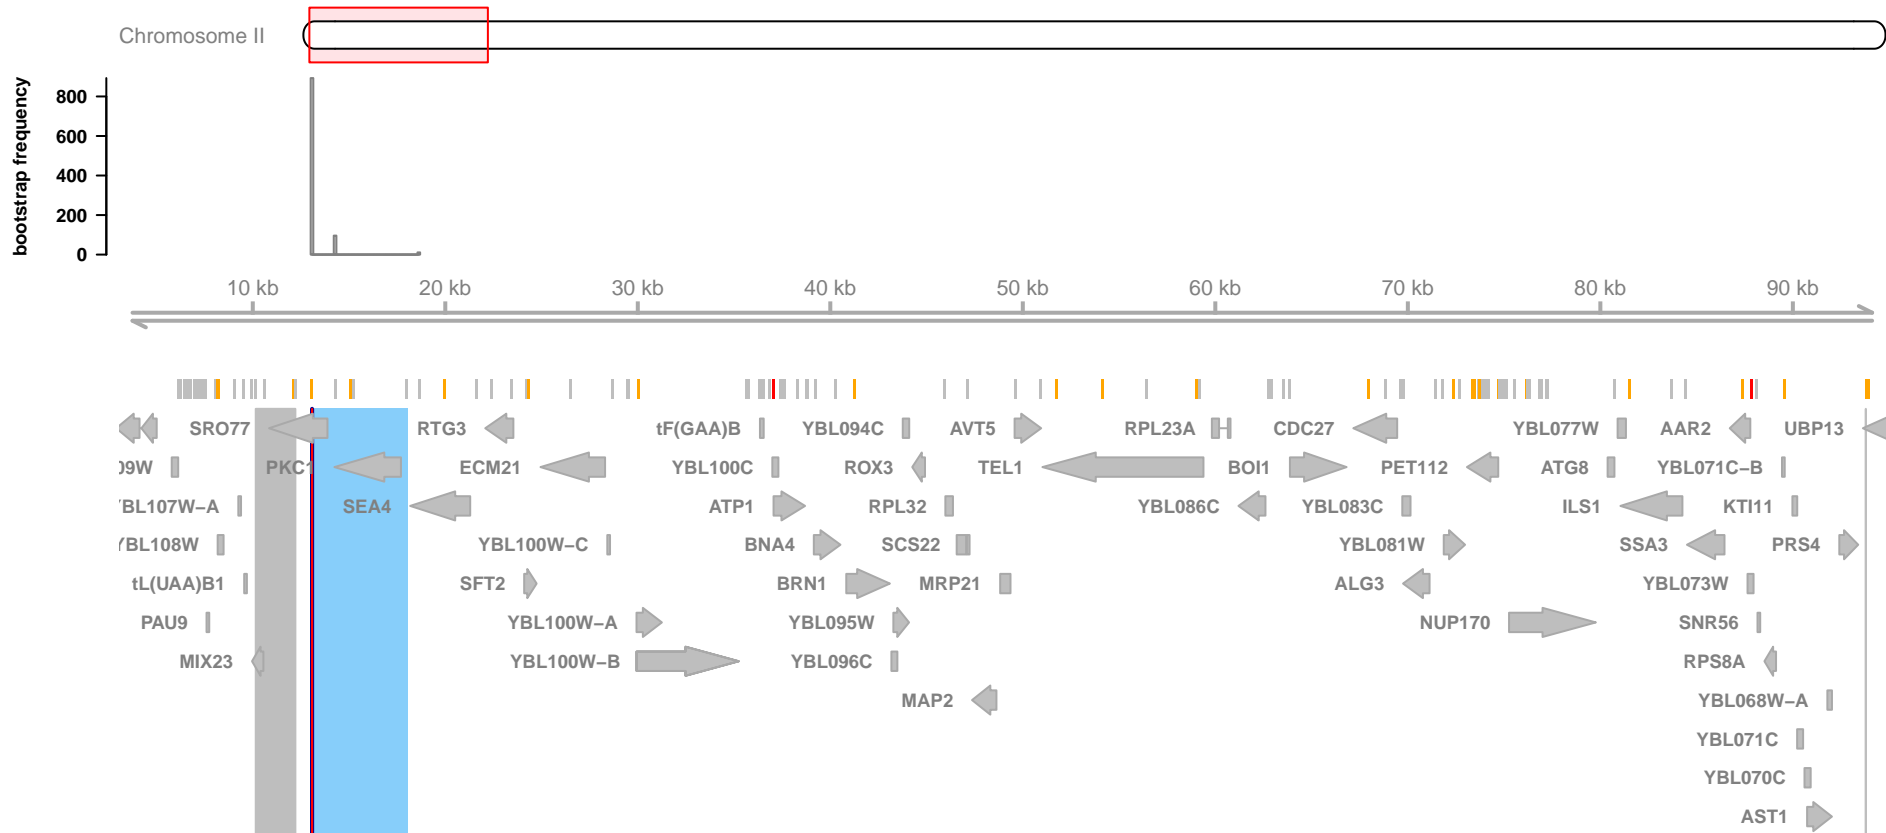

# chrII:123764\_G/A; 231 genes affected

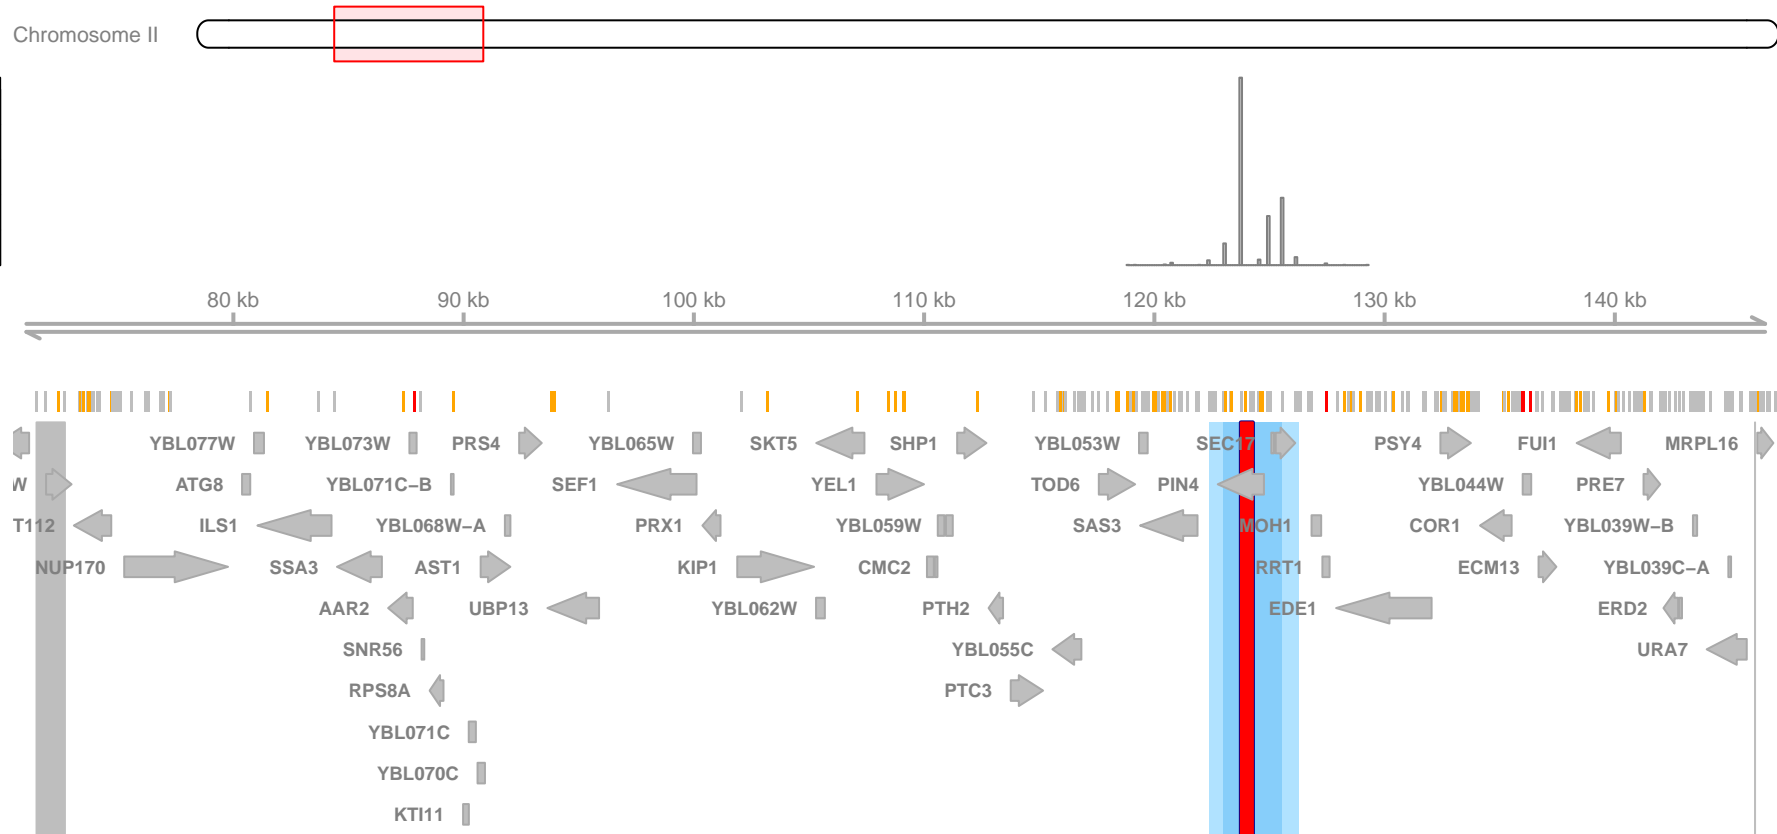

# chrII:195177\_T/A; 196 genes affected

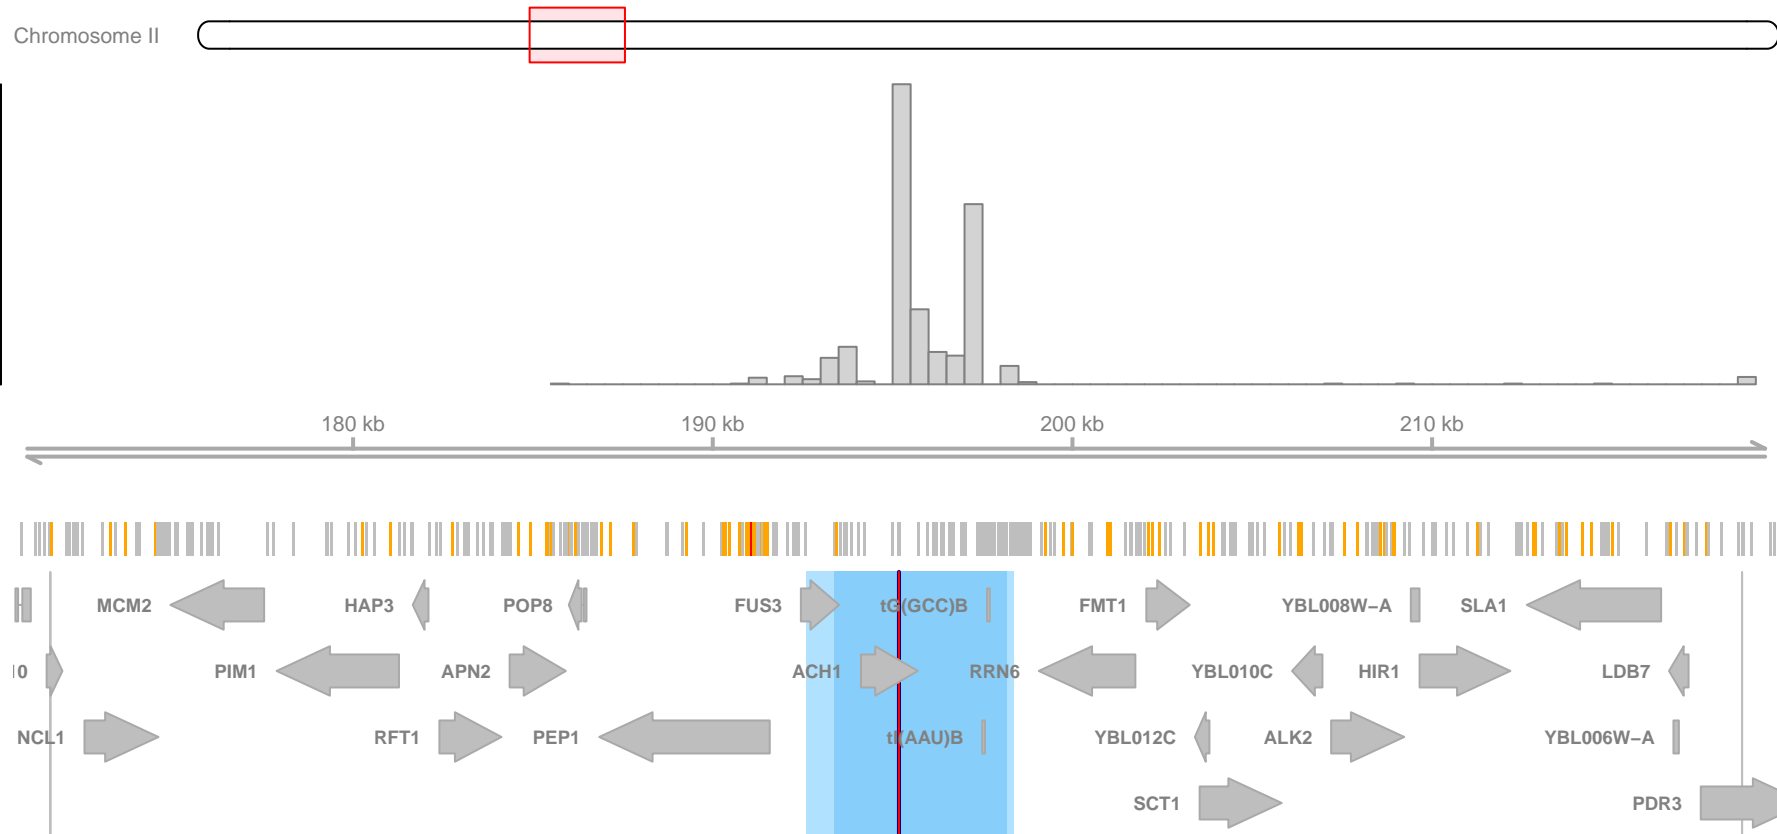

# chrII:370967\_C/T; 290 genes affected

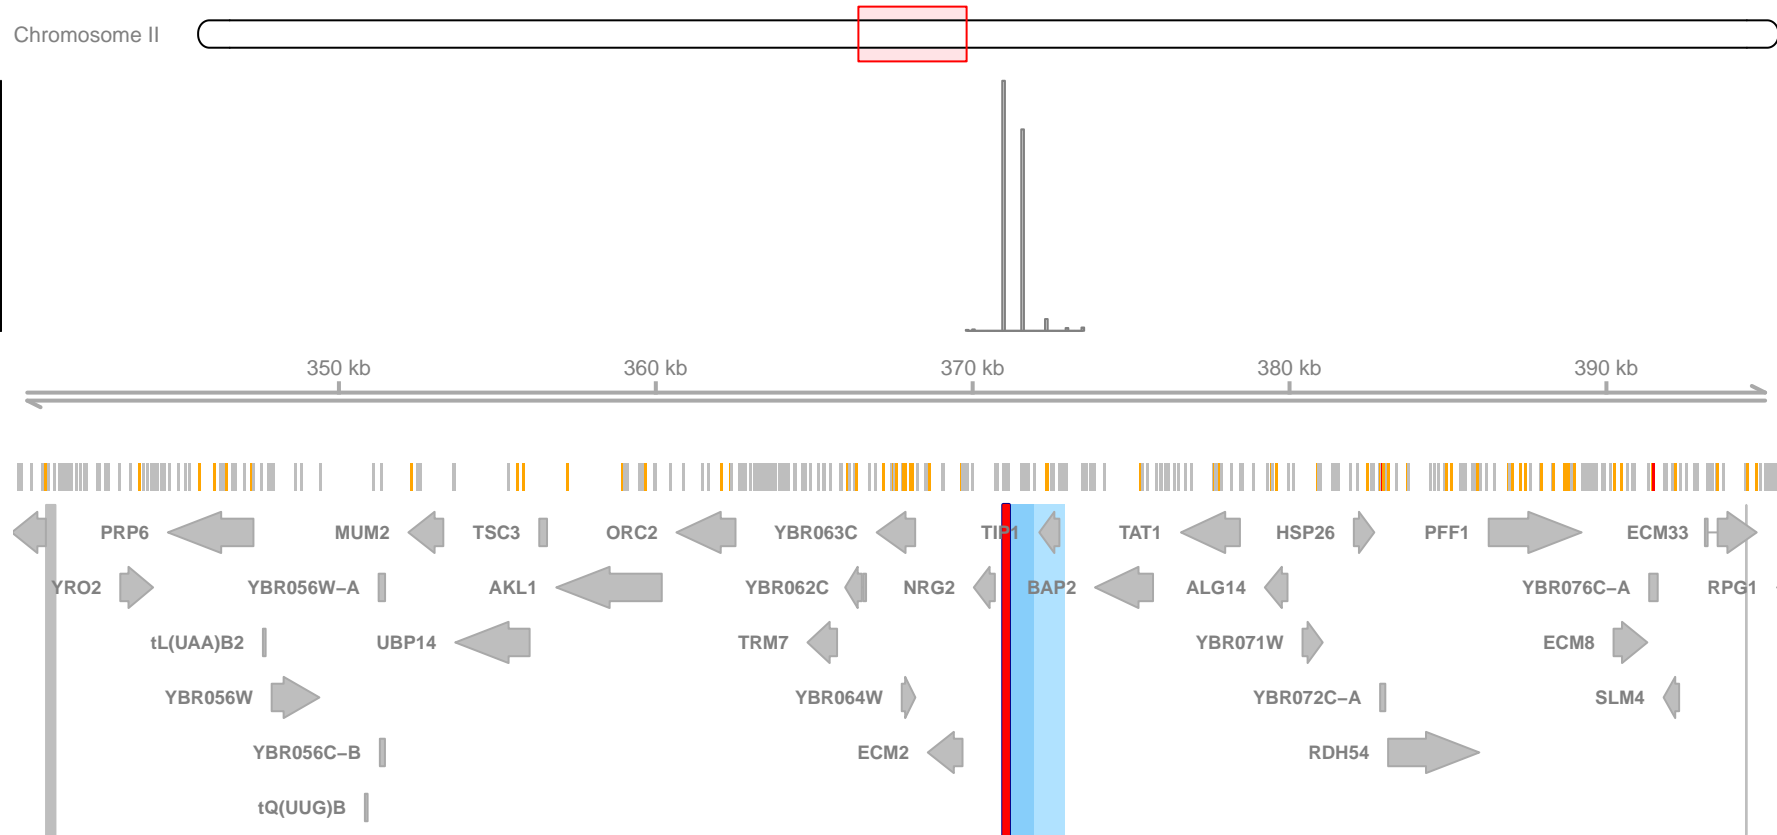



# chrII:464478\_G/A; 357 genes affected

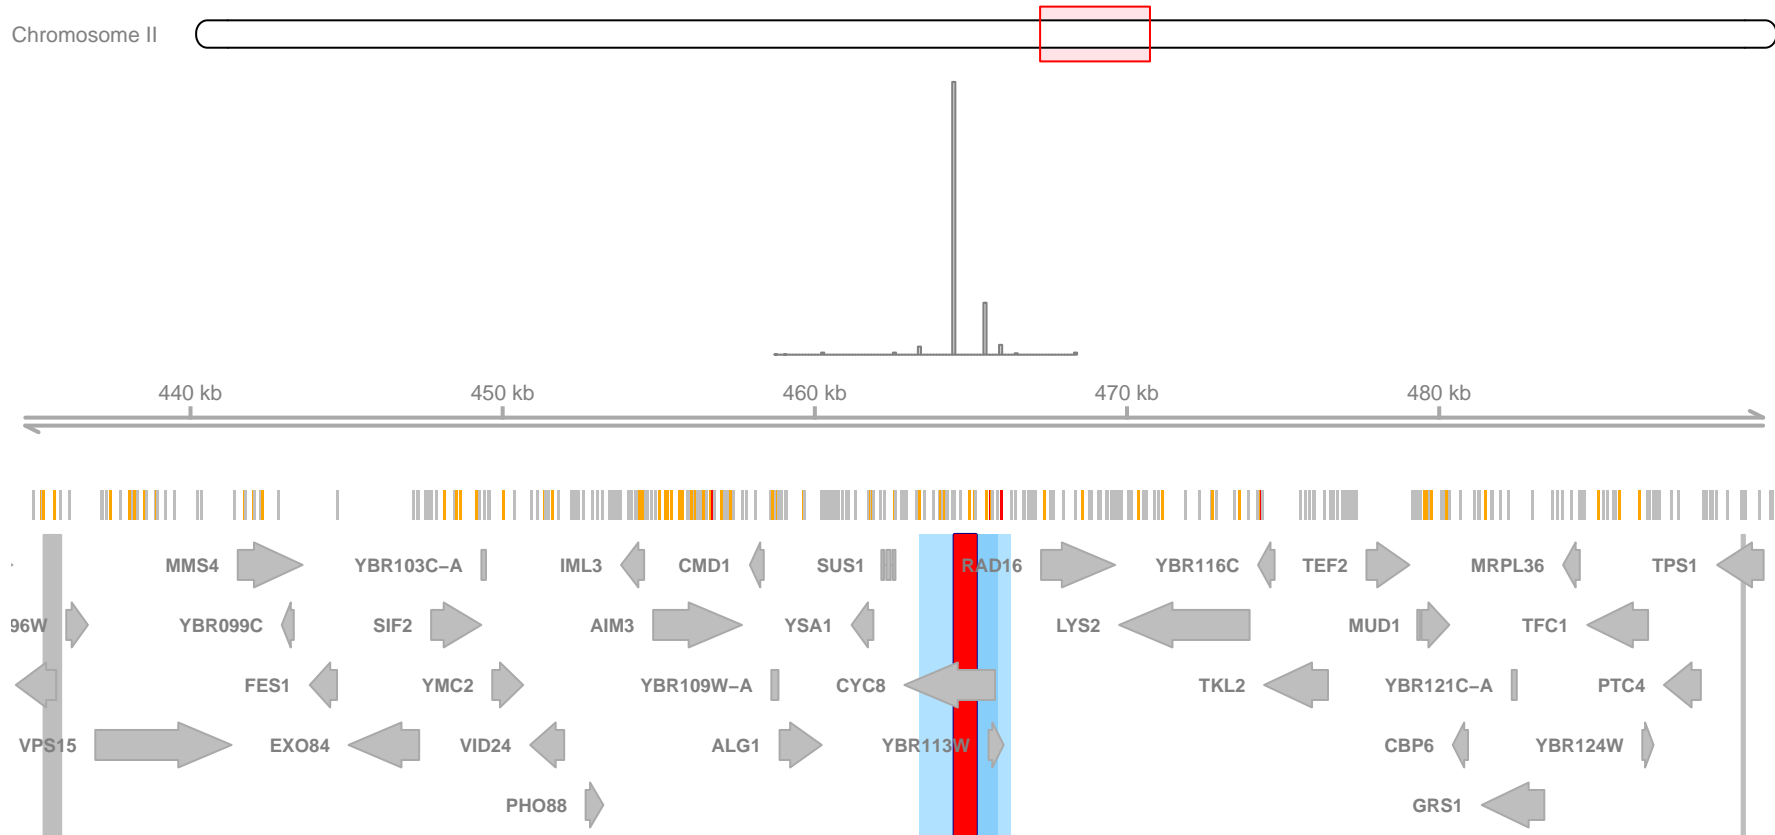

# chrII:541139\_G/A; 230 genes affected

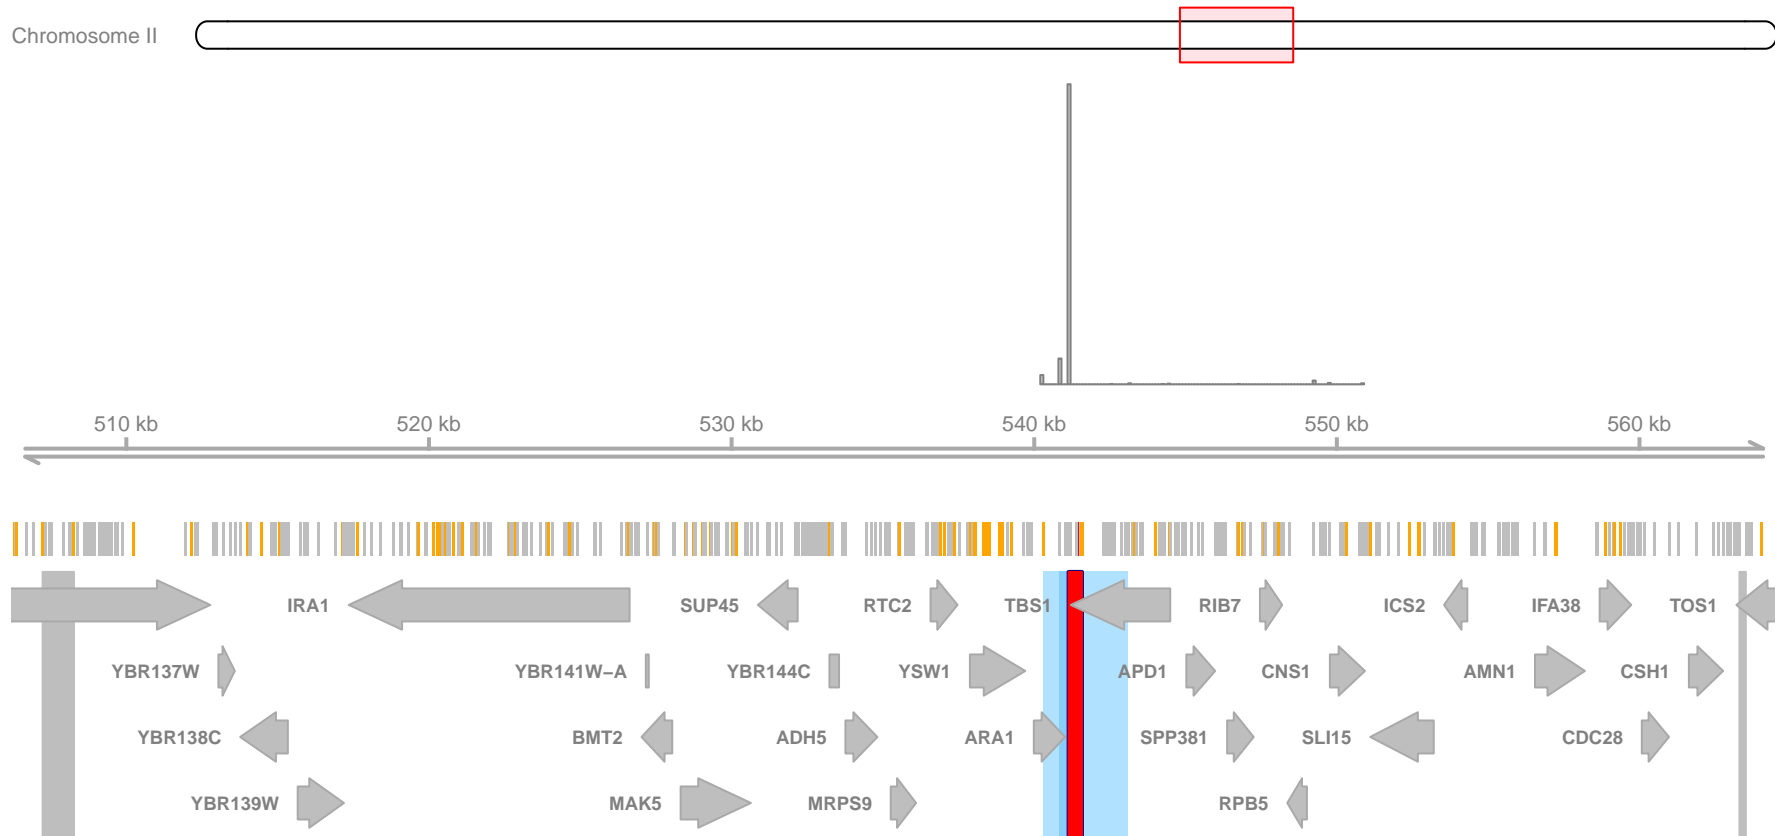

# chrII:619028\_C/A; 304 genes affected

Chromosome II

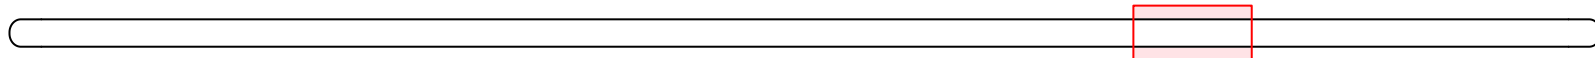

bootstrap frequency

250  
200  
150  
100  
50  
0

580 kb

590 kb

600 kb

610 kb

620 kb

630 kb

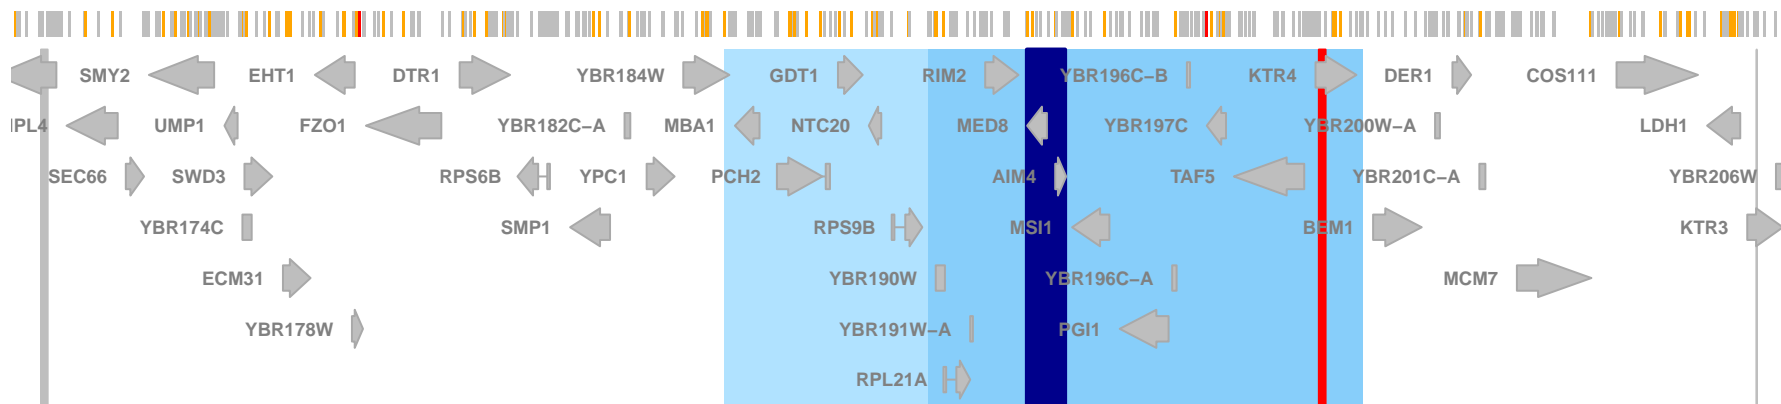

# chrIII:143912\_A/G; 39 genes affected

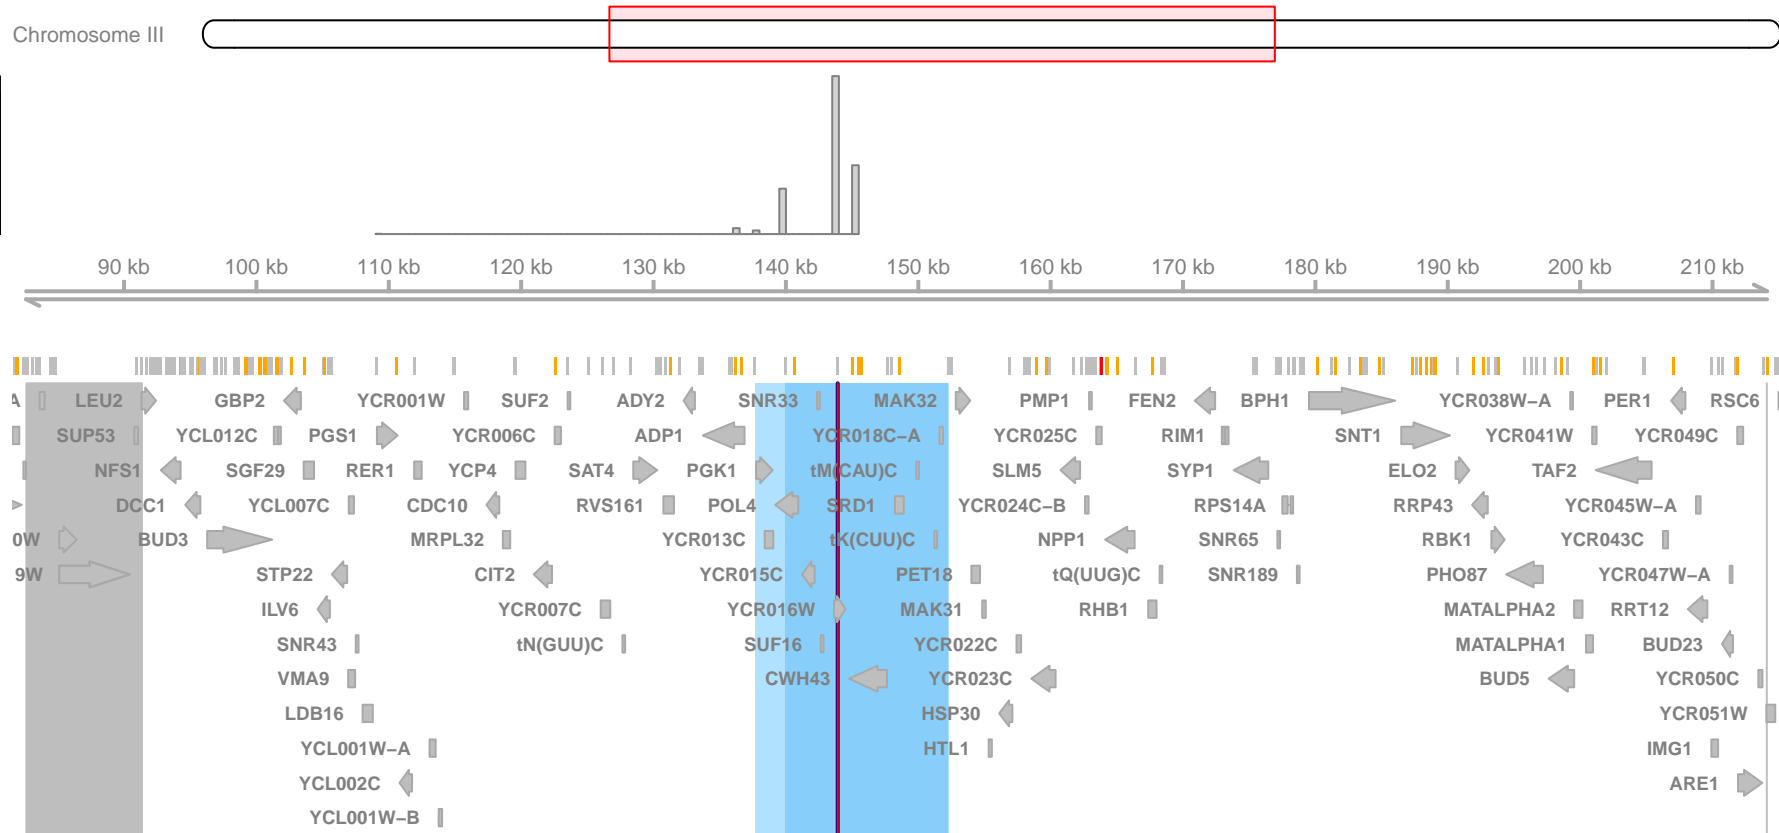

# chrIII:166390\_G/C; 27 genes affected

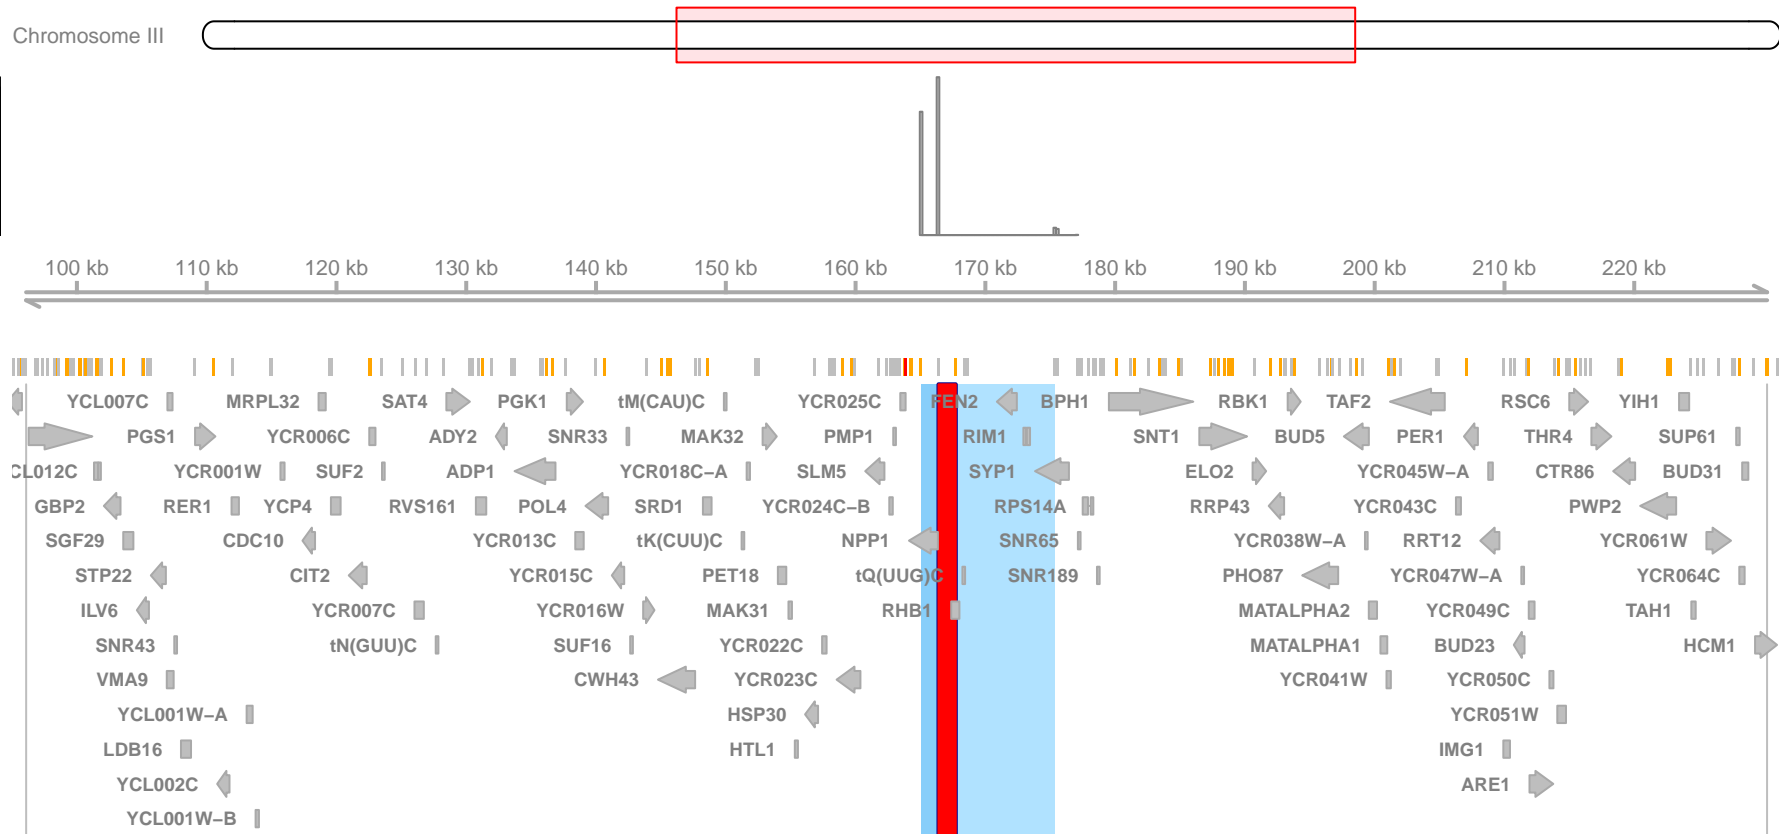

# chrIII:201185\_C/A; 80 genes affected

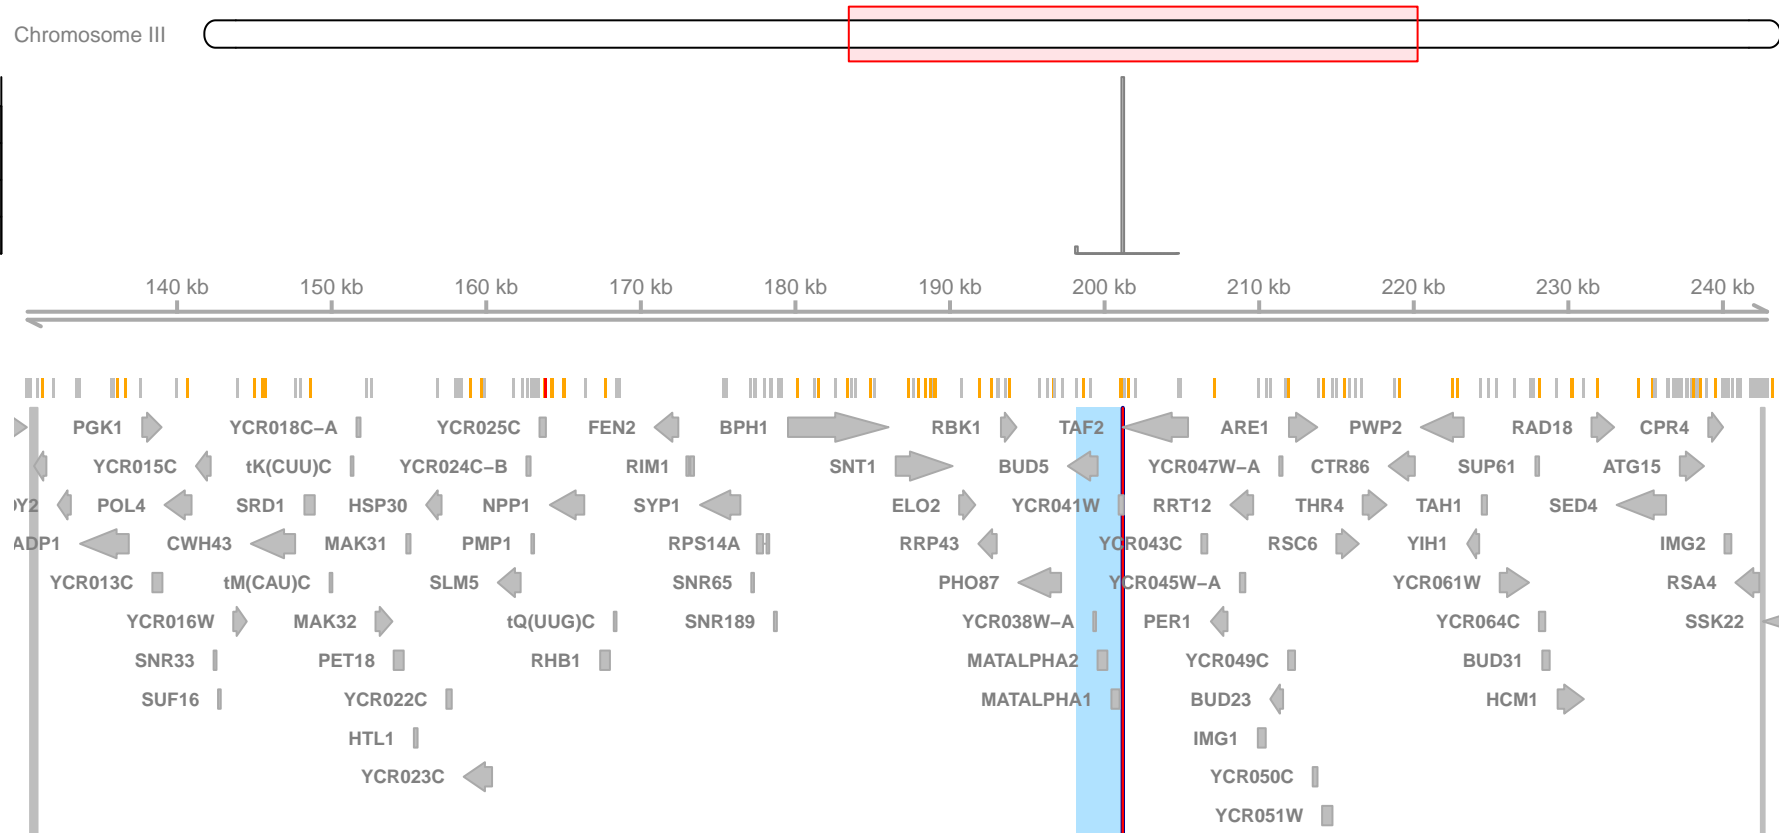

# chrIII:262105\_C/T; 45 genes affected

Chromosome III

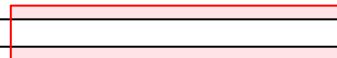

bootstrap frequency

400  
300  
200  
100  
0

250 kb

260 kb

270 kb

280 kb

290 kb

300 kb

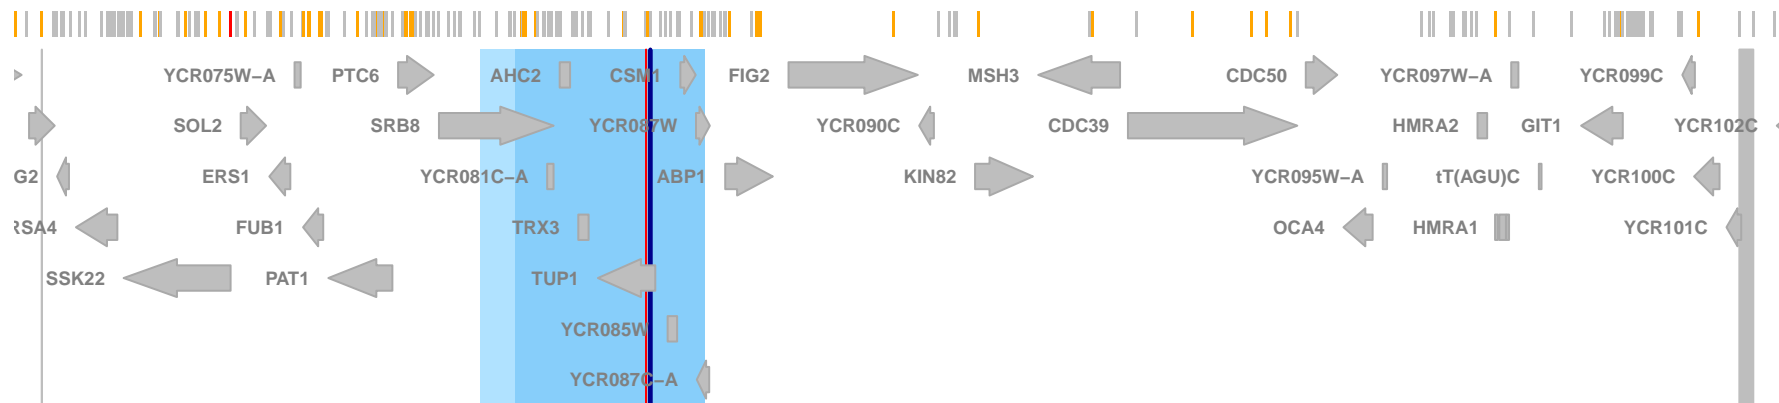

# chrIV:46090\_C/G; 712 genes affected

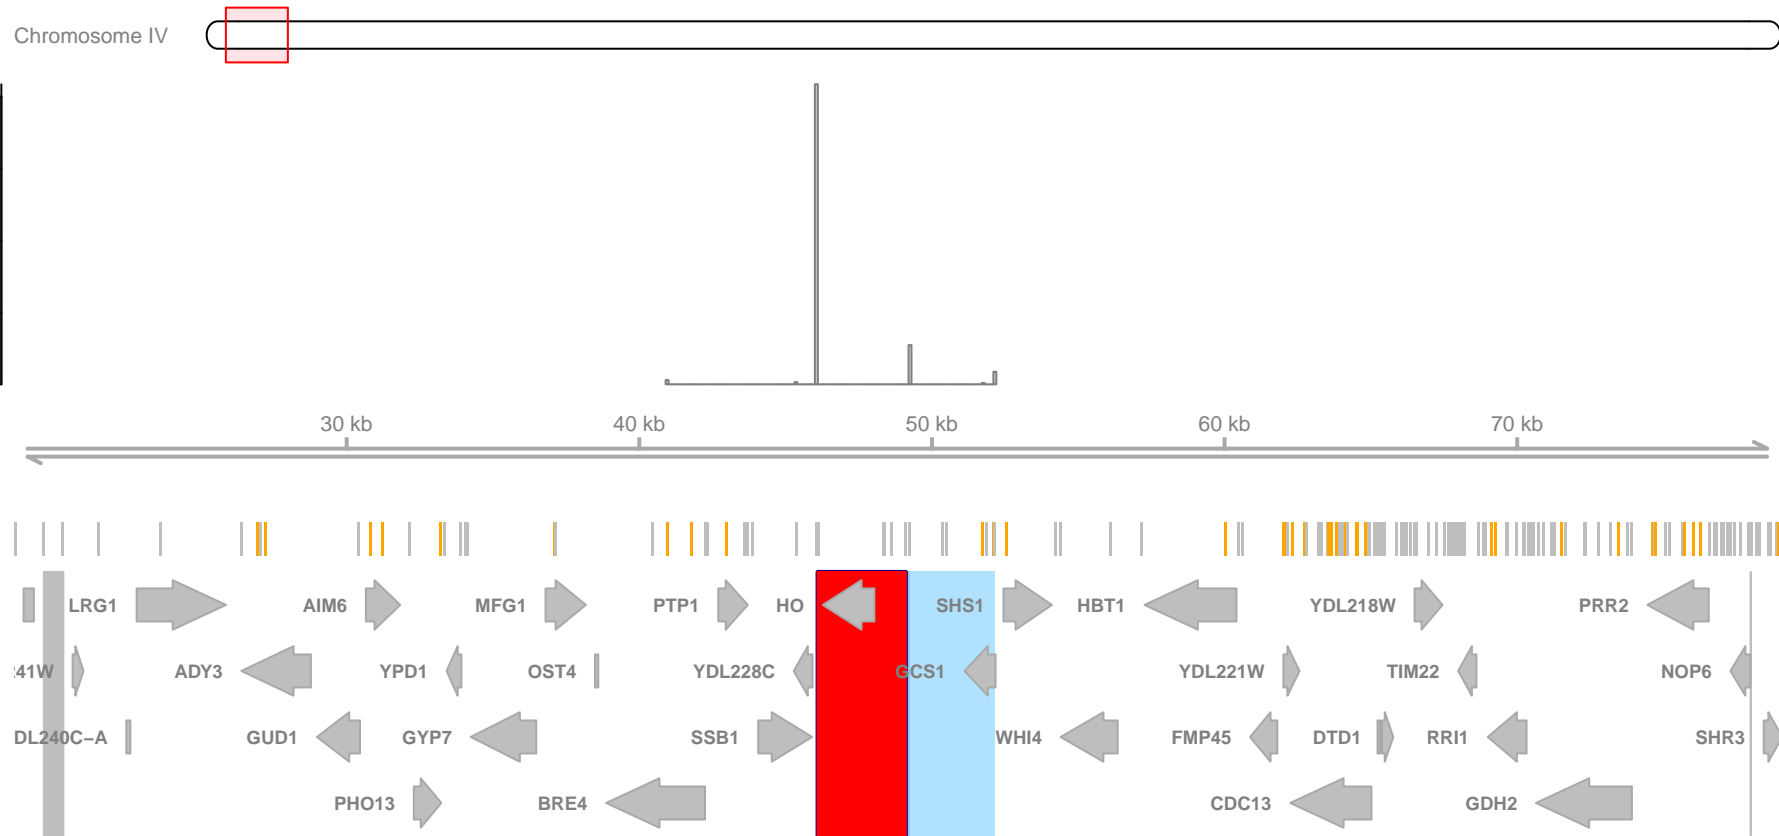



# chrIV:156943\_A/G; 916 genes affected

Chromosome IV

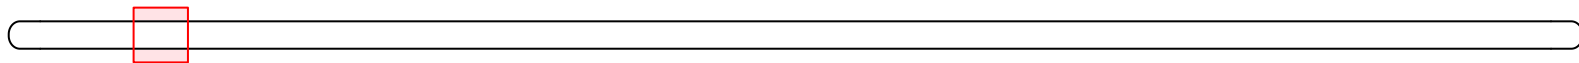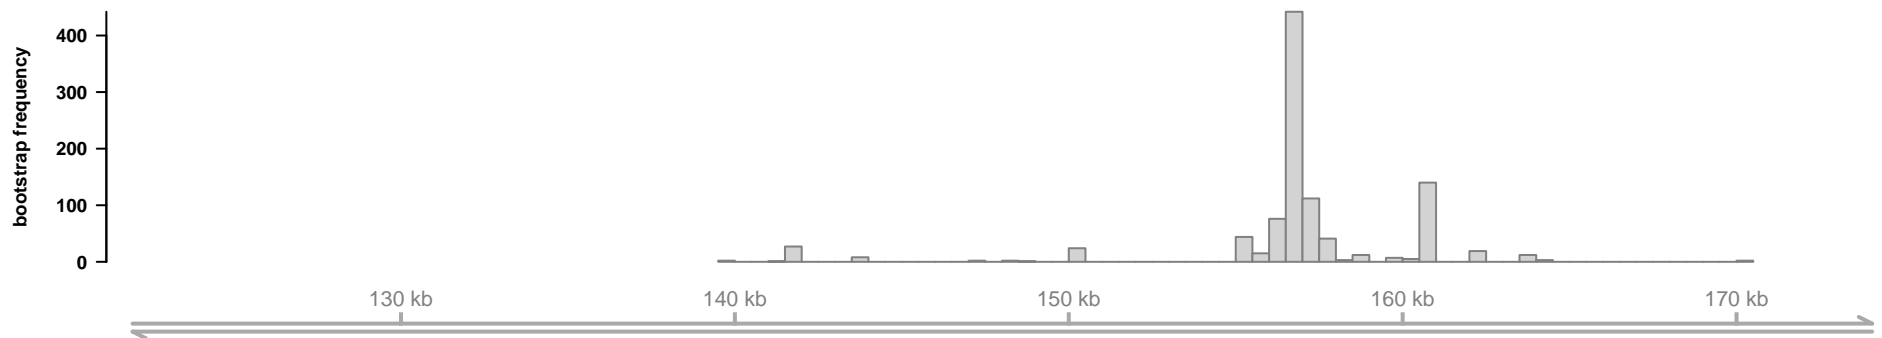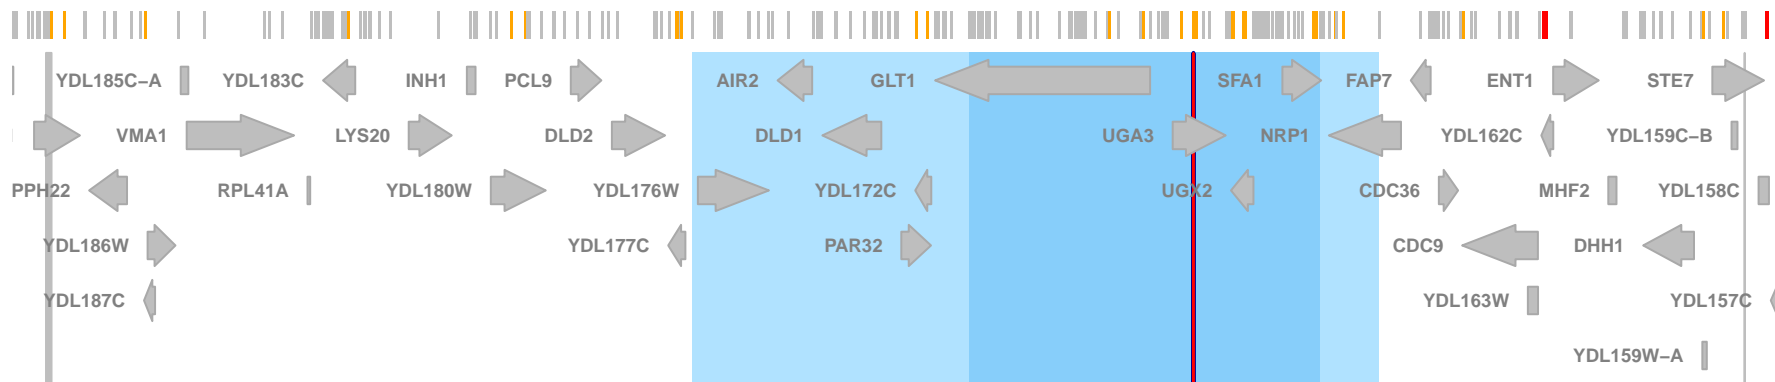

# chrIV:215523\_T/C; 1419 genes affected

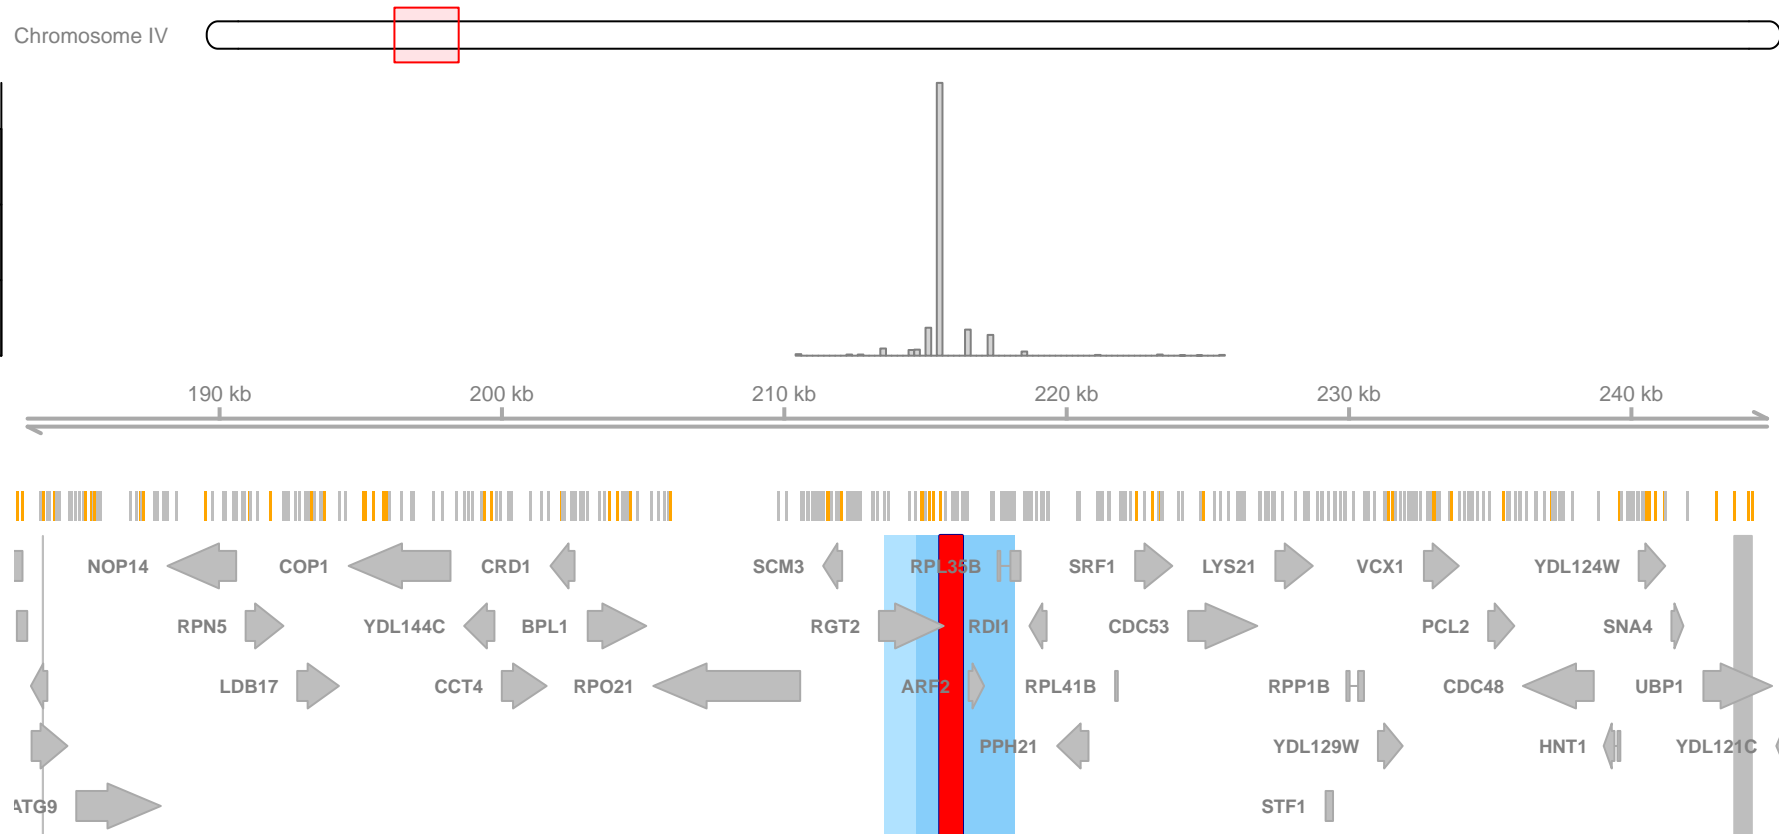

# chrIV:461656\_A/G; 1154 genes affected

Chromosome IV

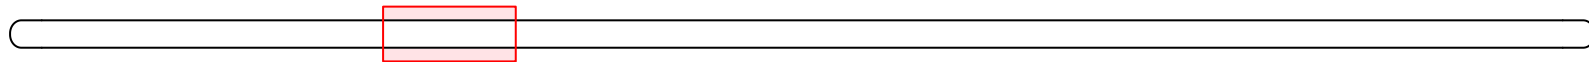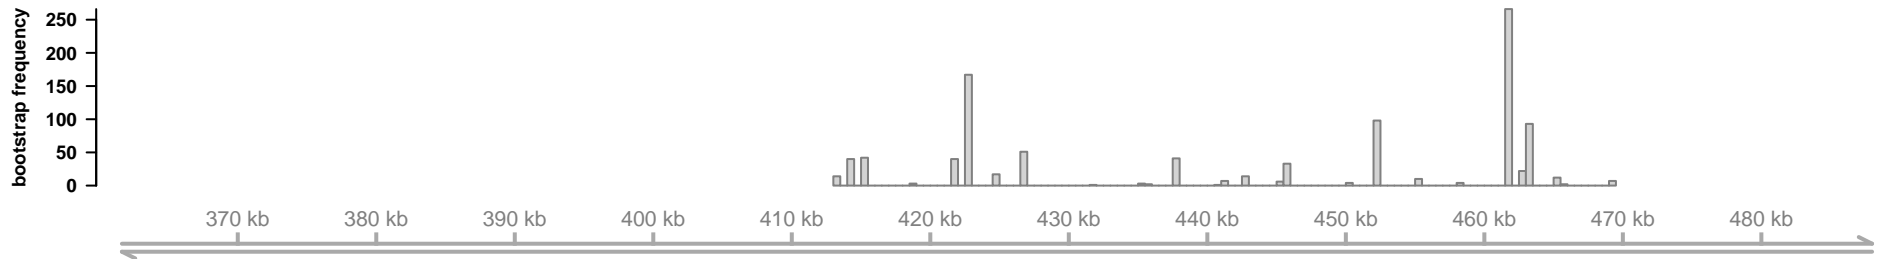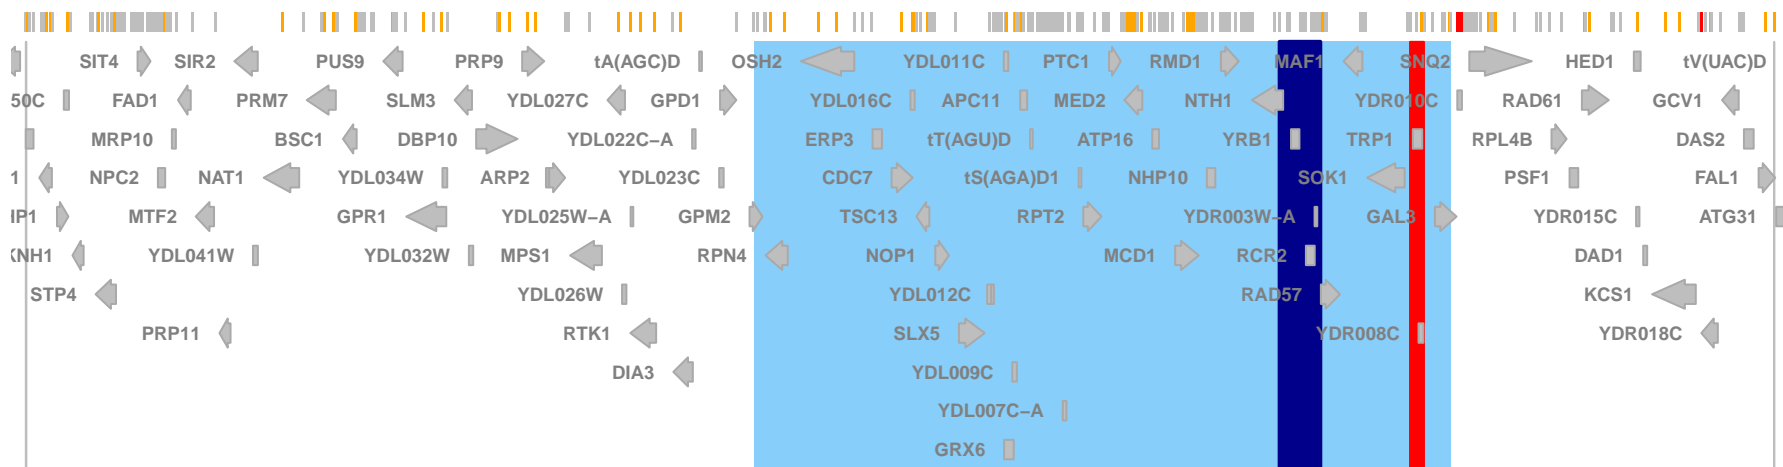

# chrIV:509407\_G/T; 757 genes affected

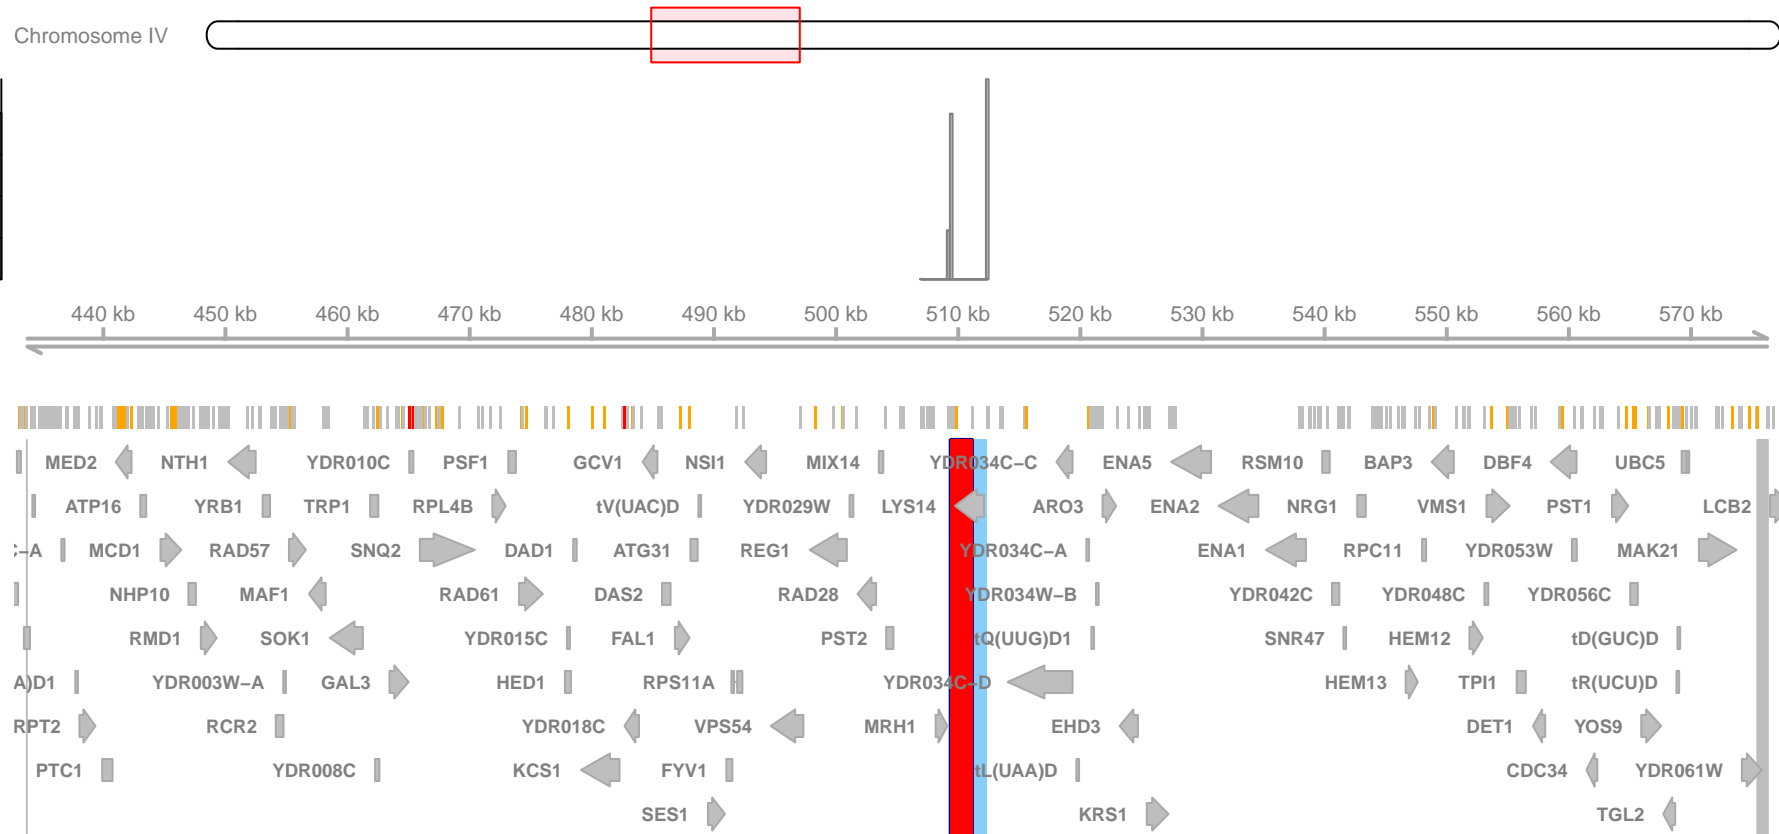

# chrIV:637663\_A/T; 913 genes affected

Chromosome IV

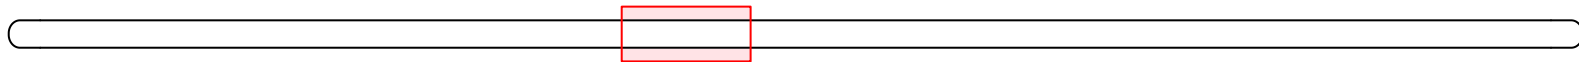

bootstrap frequency

800  
600  
400  
200  
0

600 kb 610 kb 620 kb 630 kb 640 kb 650 kb 660 kb 670 kb 680 kb 690 kb 700 kb 710 kb

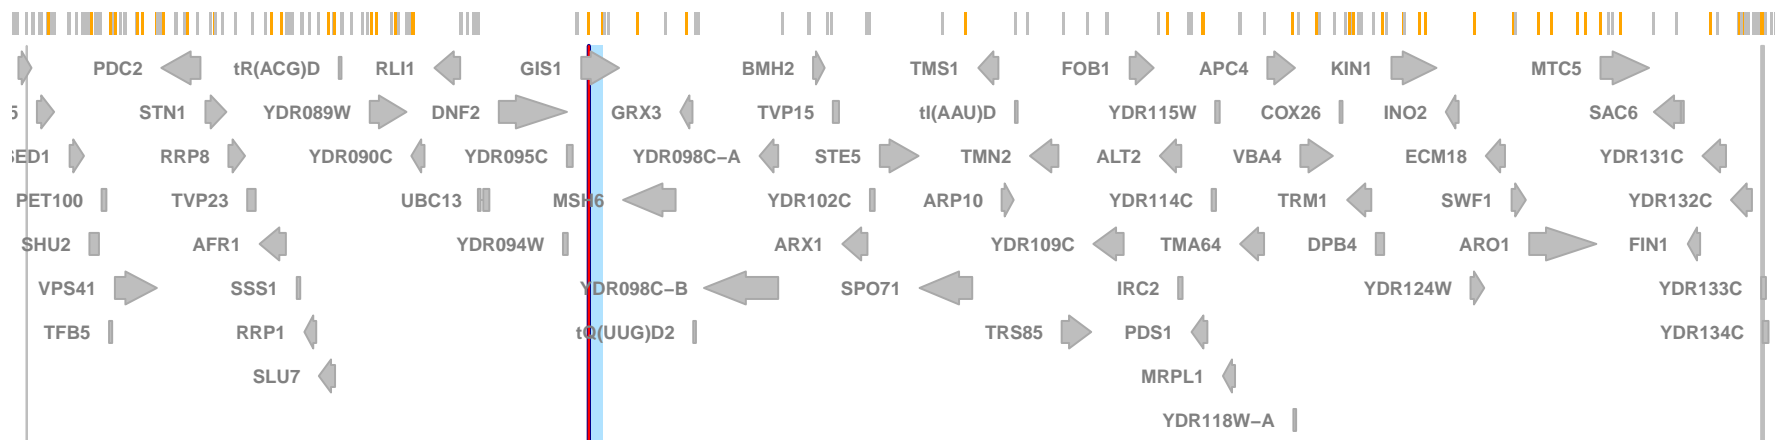

# chrIV:681304\_G/A; 1182 genes affected

Chromosome IV

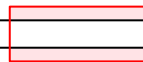

bootstrap frequency

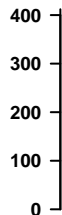

610 kb 620 kb 630 kb 640 kb 650 kb 660 kb 670 kb 680 kb 690 kb 700 kb 710 kb 720 kb 730 kb

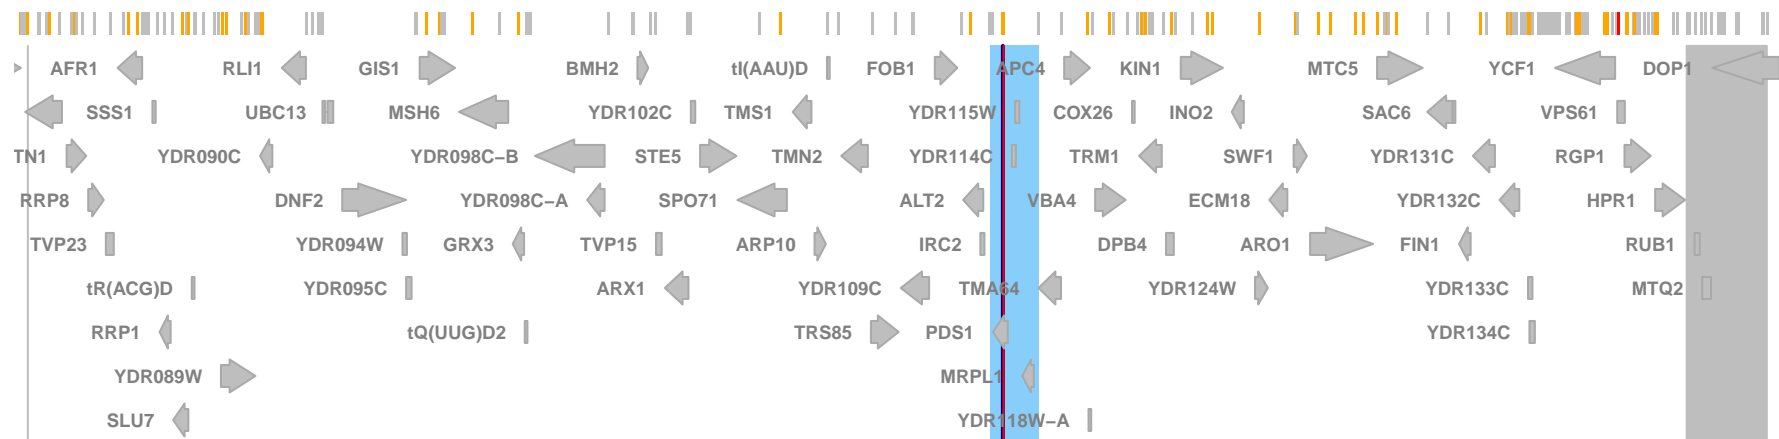

# chrIV:745766\_G/A; 858 genes affected

Chromosome IV

bootstrap frequency

600  
500  
400  
300  
200  
100  
0

700 kb 710 kb 720 kb 730 kb 740 kb 750 kb 760 kb 770 kb 780 kb 790 kb 800 kb 810 kb 820 kb

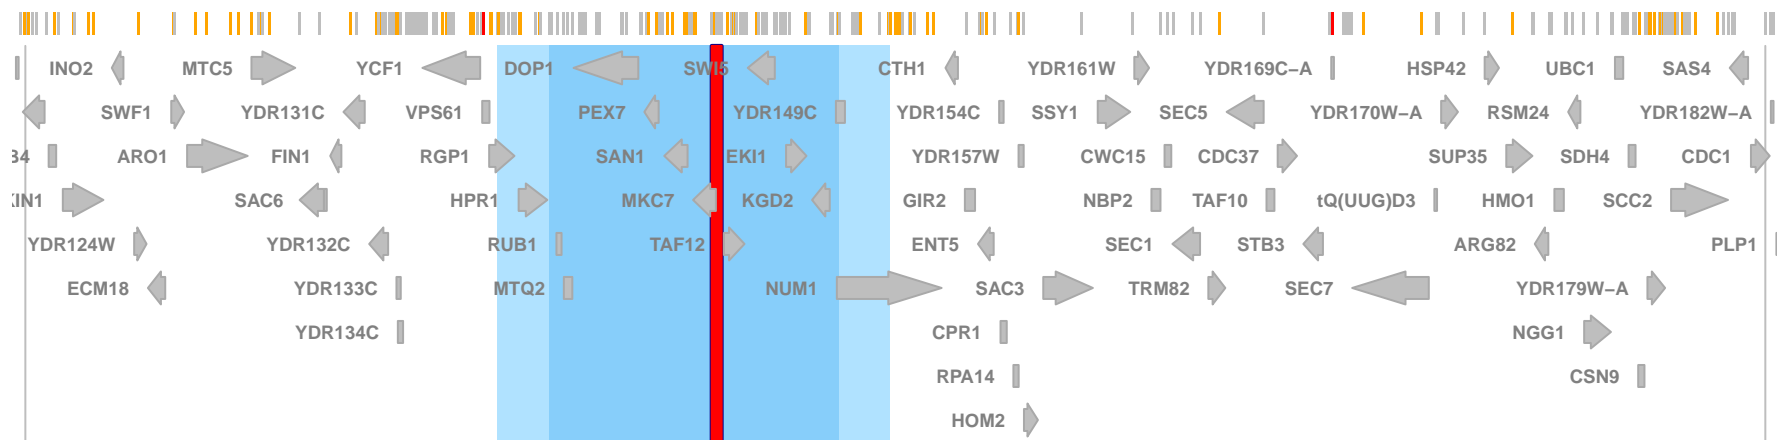

# chrIV:975156\_A/G; 1014 genes affected

Chromosome IV

bootstrap frequency

800  
600  
400  
200  
0

930 kb 940 kb 950 kb 960 kb 970 kb 980 kb 990 kb 1000 kb 1010 kb 1020 kb 1030 kb 1040 kb 1050 kb

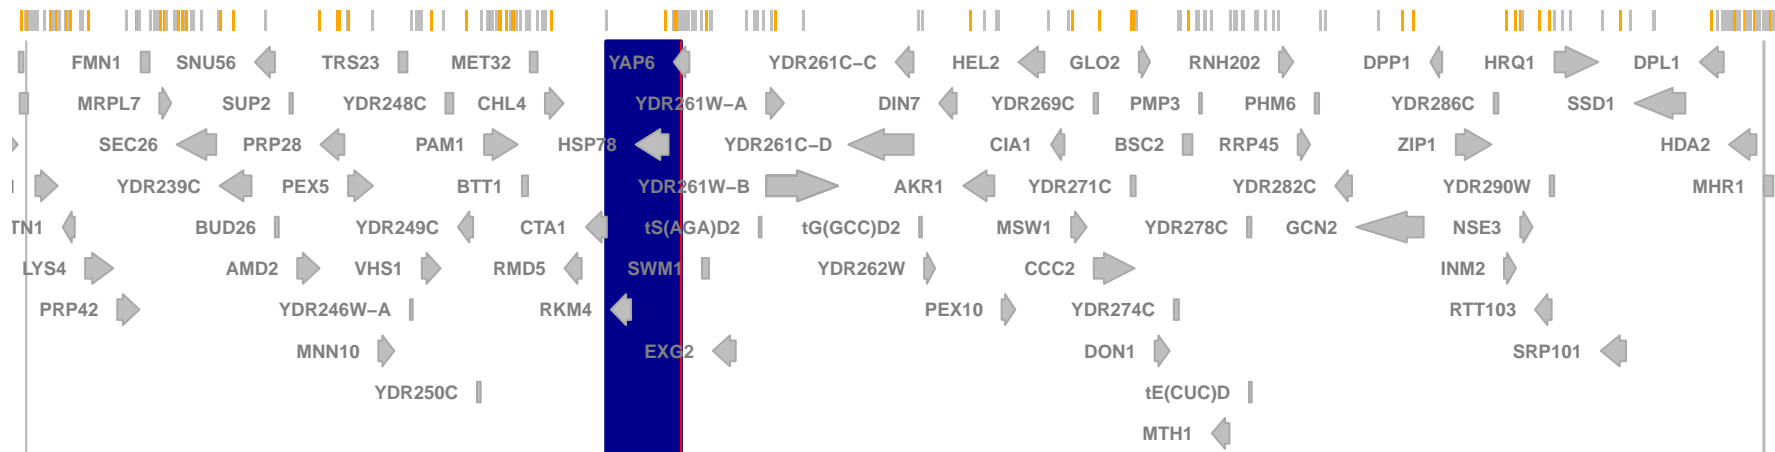



# chrIV:1182010\_T/C; 798 genes affected

Chromosome IV

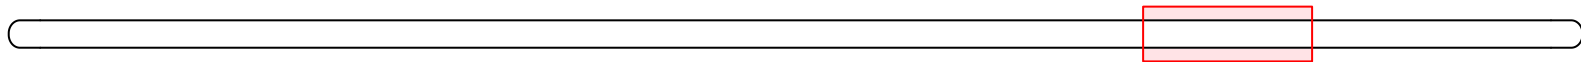

bootstrap frequency

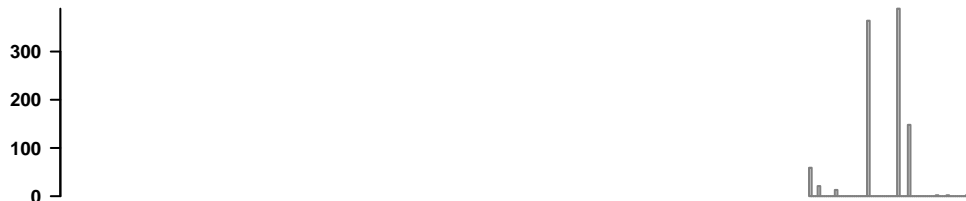

1.15 mb

1.2 mb

1.25 mb

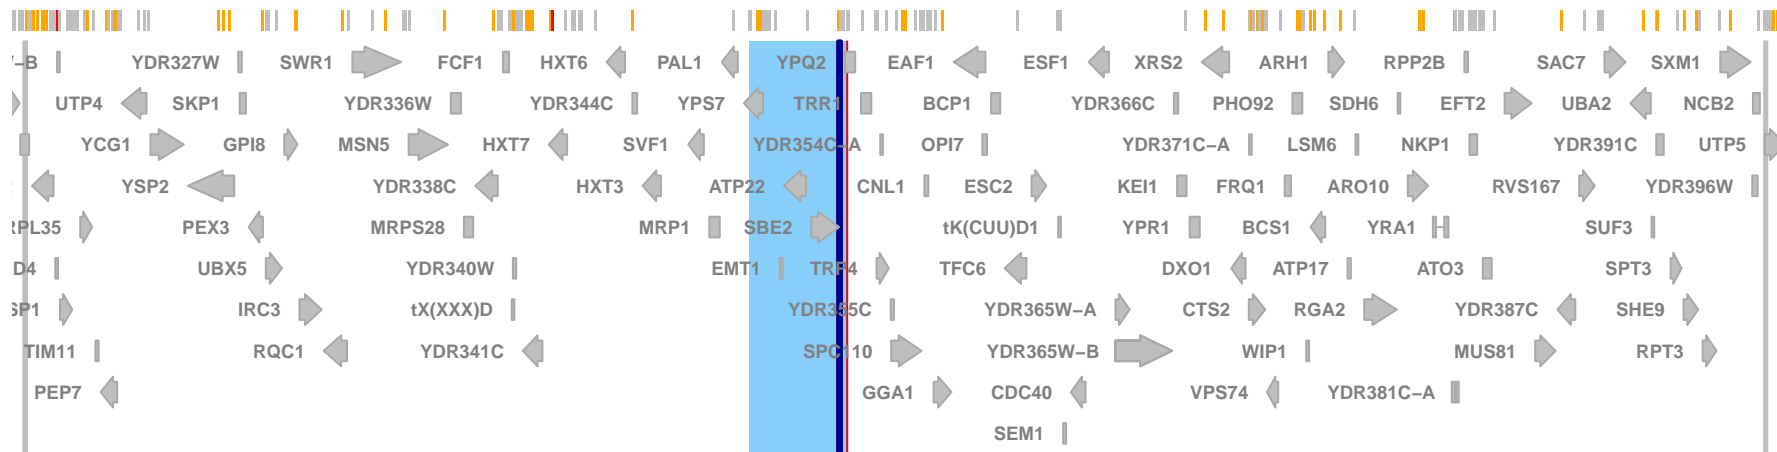

# chrIV:1357789\_T/G; 988 genes affected

Chromosome IV

bootstrap frequency

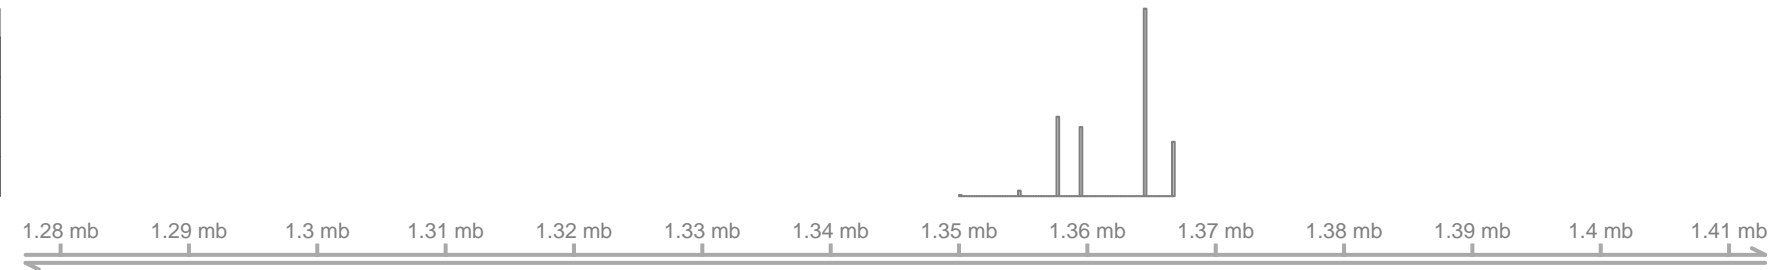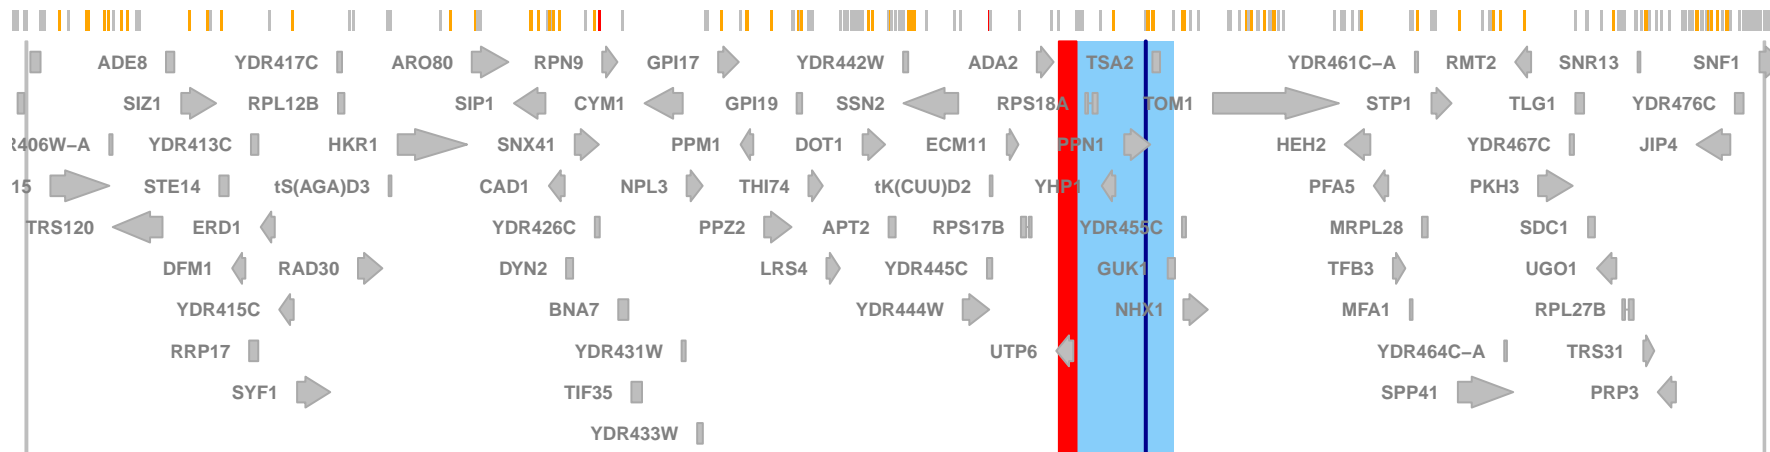

# chrIV:1521369\_A/C; 545 genes affected

Chromosome IV

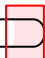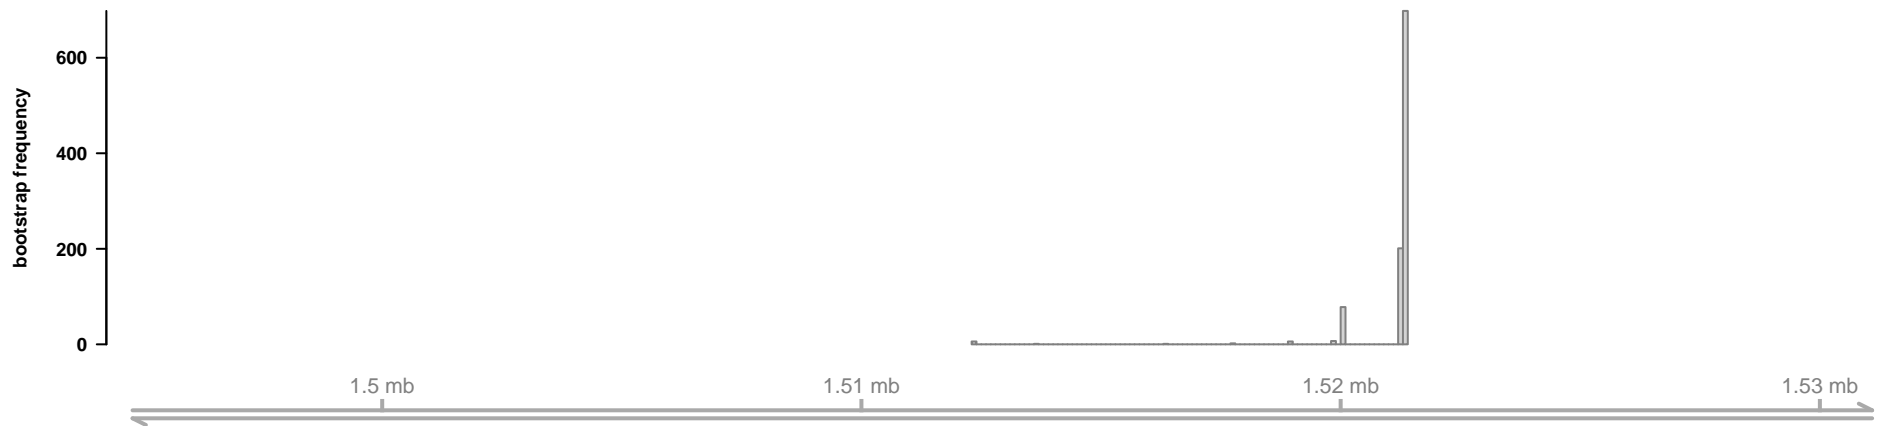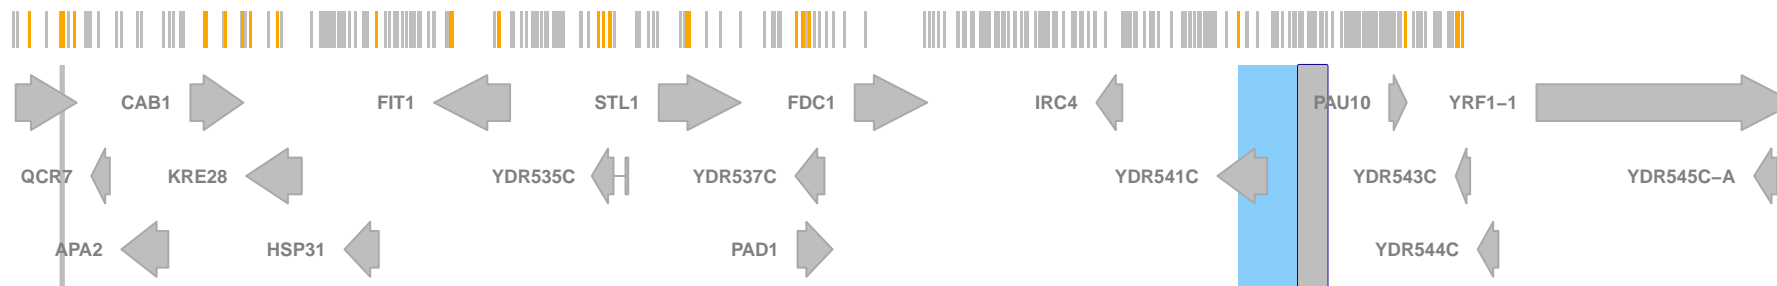

# chrV:11186\_T/C; 113 genes affected

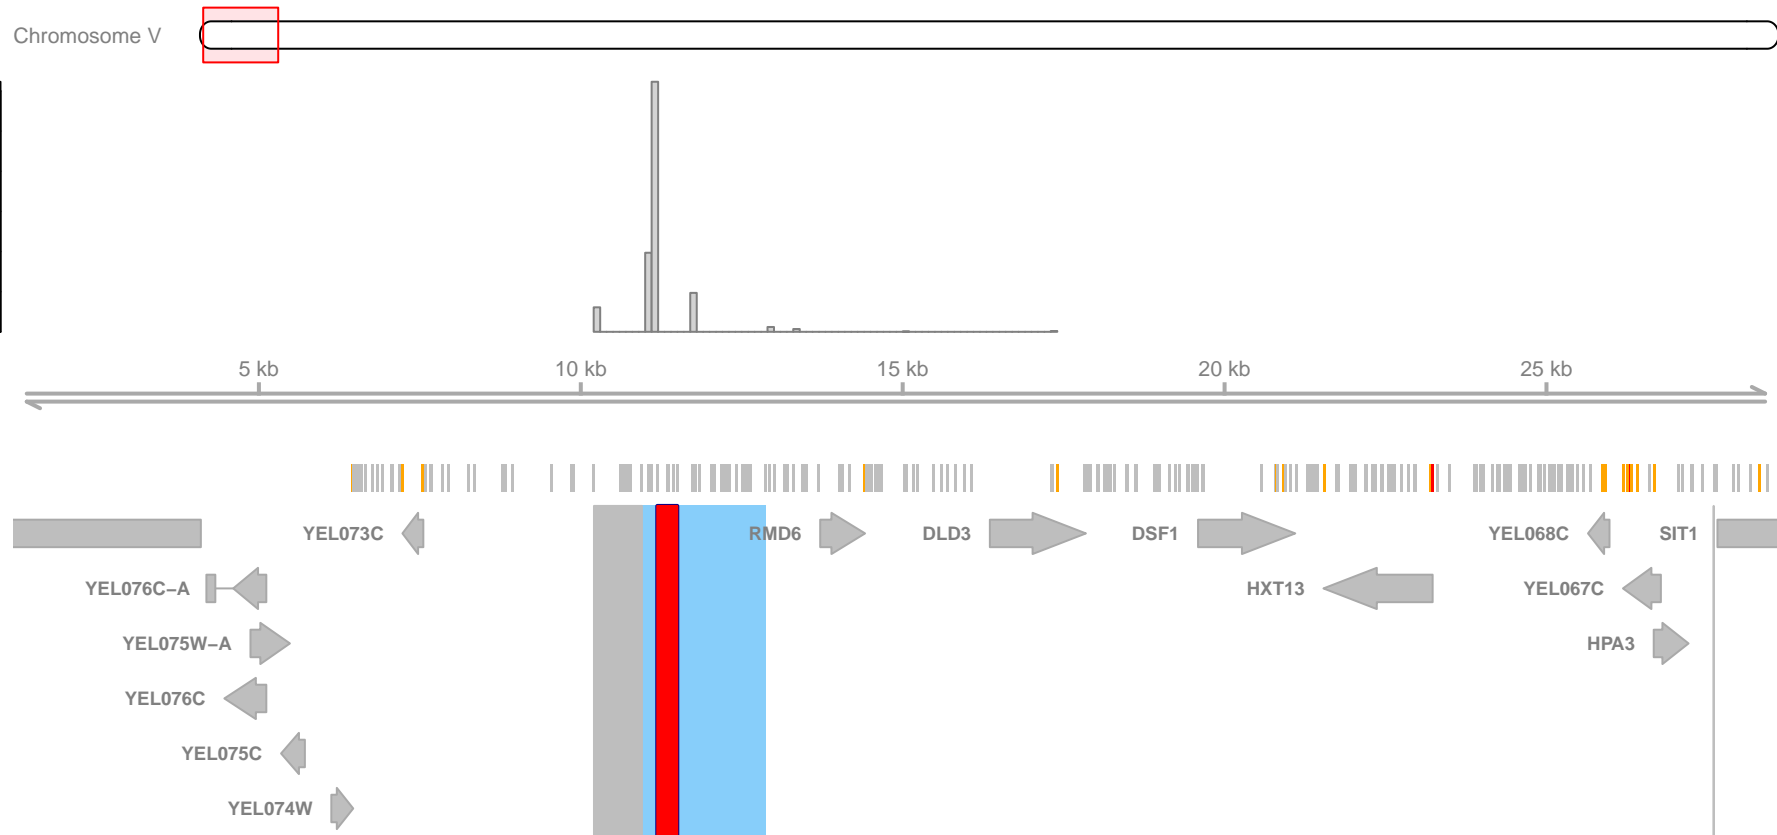

# chrV:183957\_A/G; 459 genes affected

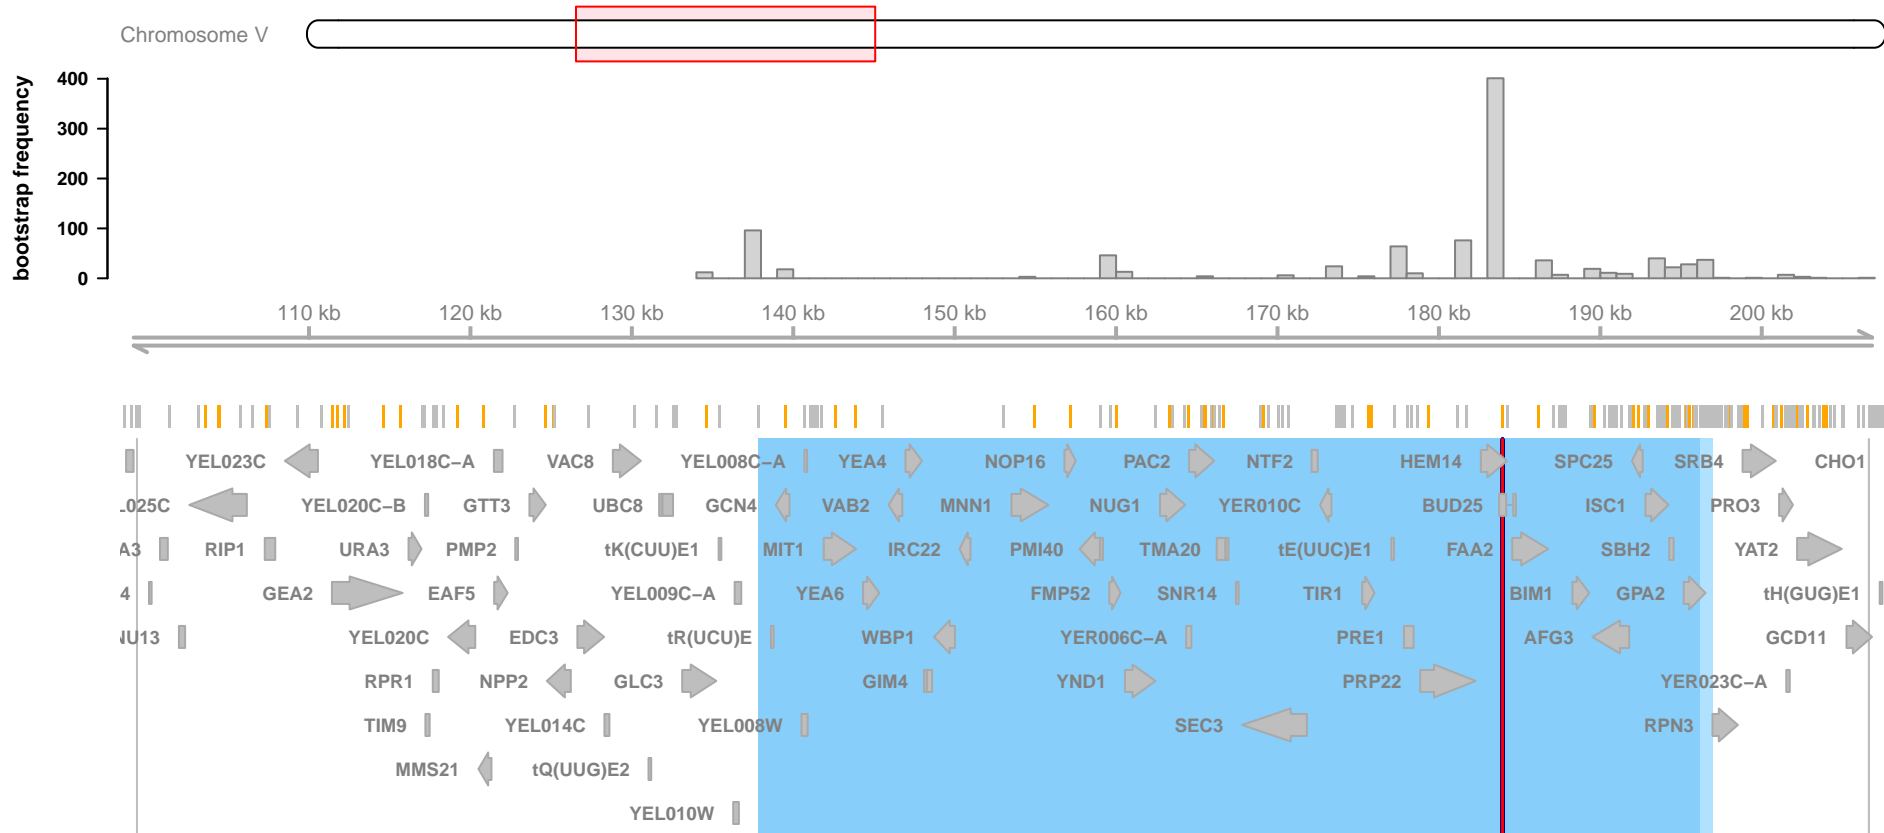

# chrV:418504\_A/G; 160 genes affected

Chromosome V

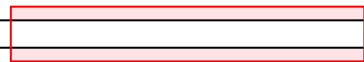

bootstrap frequency

300  
200  
100  
0

360 kb 370 kb 380 kb 390 kb 400 kb 410 kb 420 kb 430 kb 440 kb 450 kb 460 kb 470 kb 480 kb

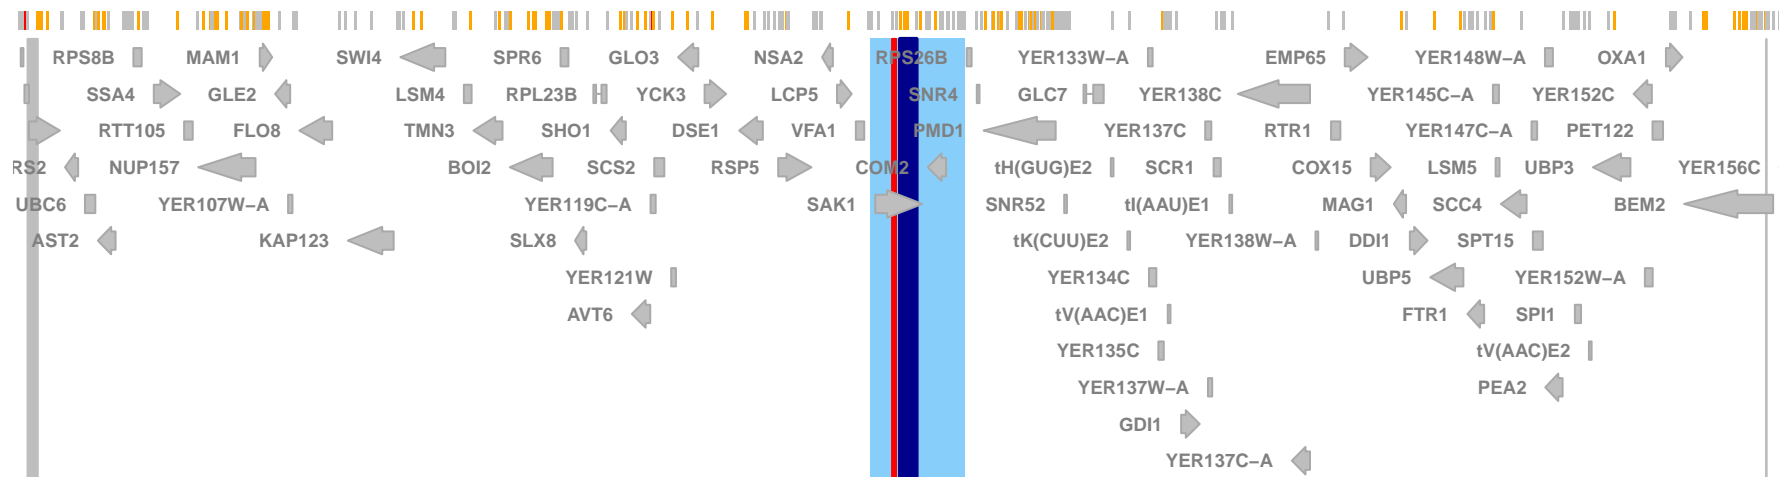

# chrV:524625\_A/T; 208 genes affected

Chromosome V

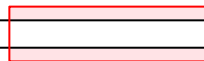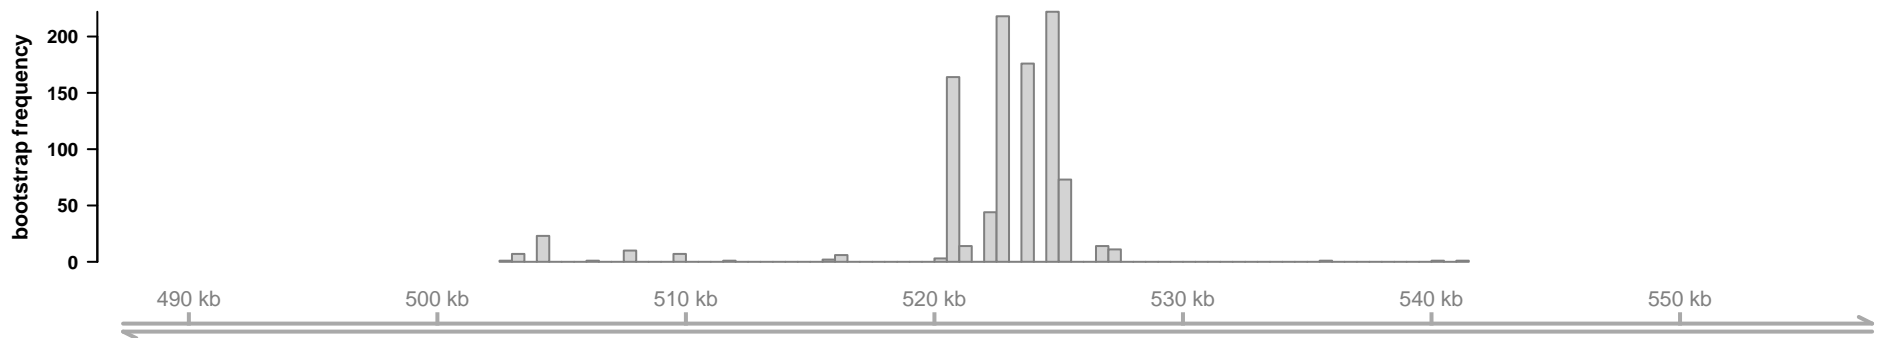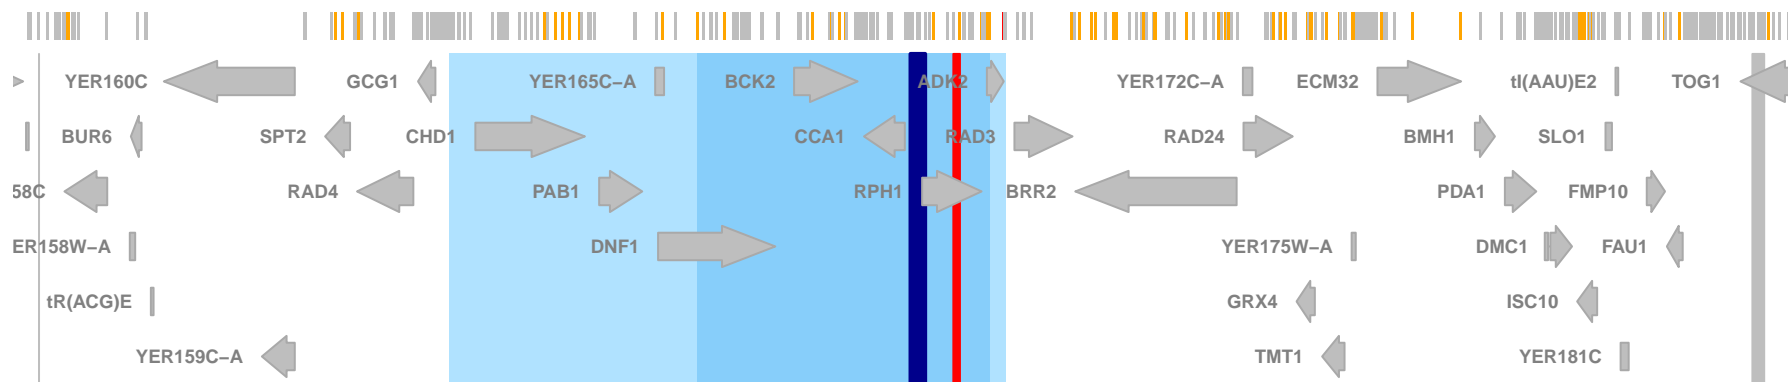

# chrVI:71959\_C/T; 160 genes affected

Chromosome VI

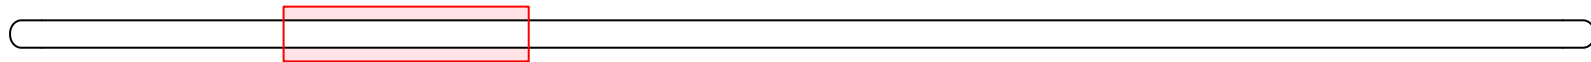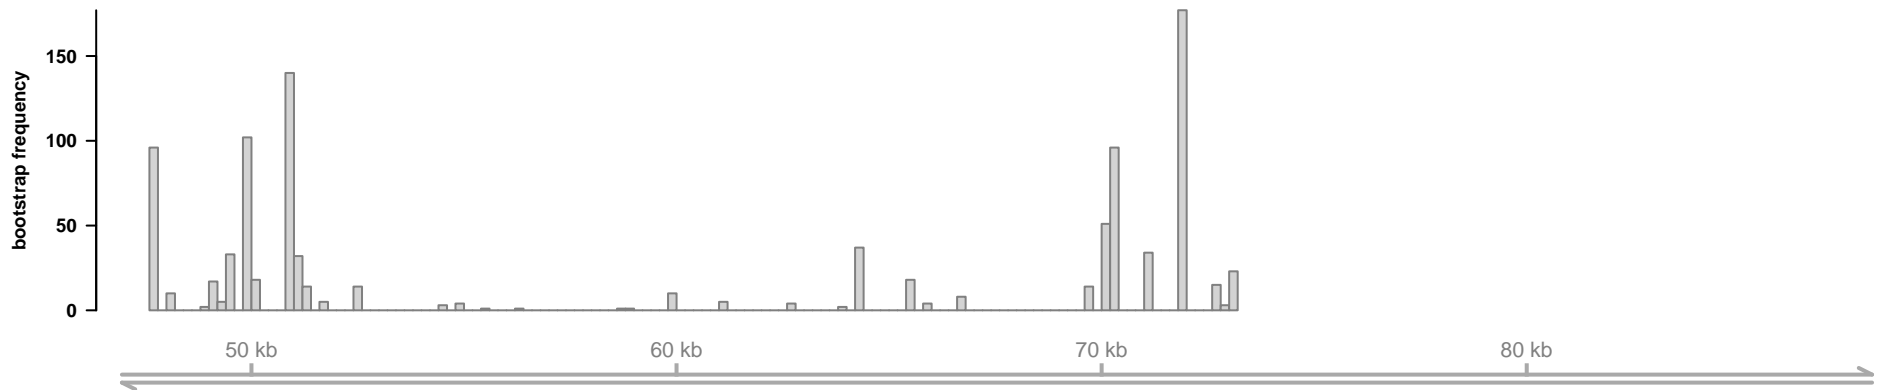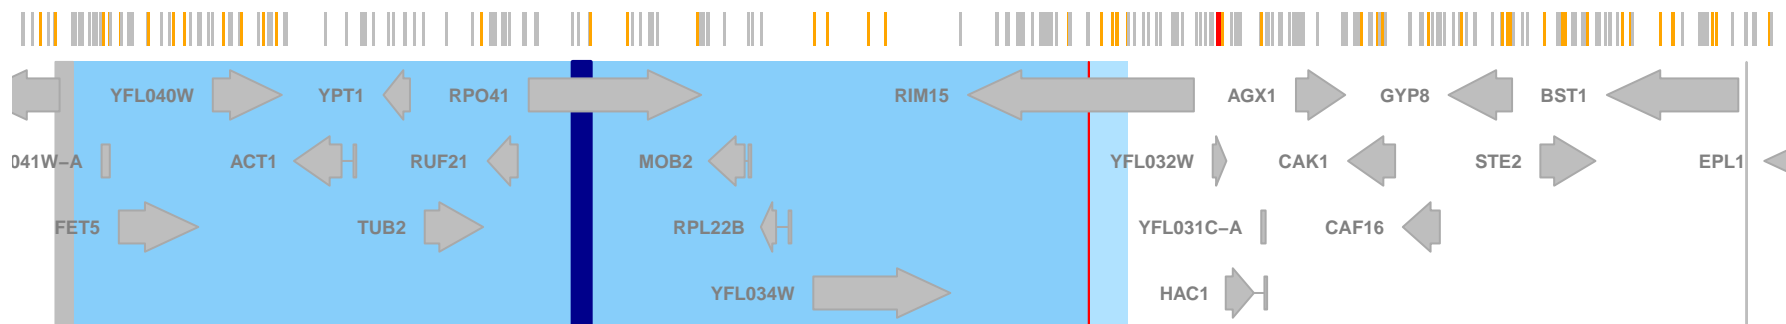



# chrVI:95849\_T/C; 161 genes affected

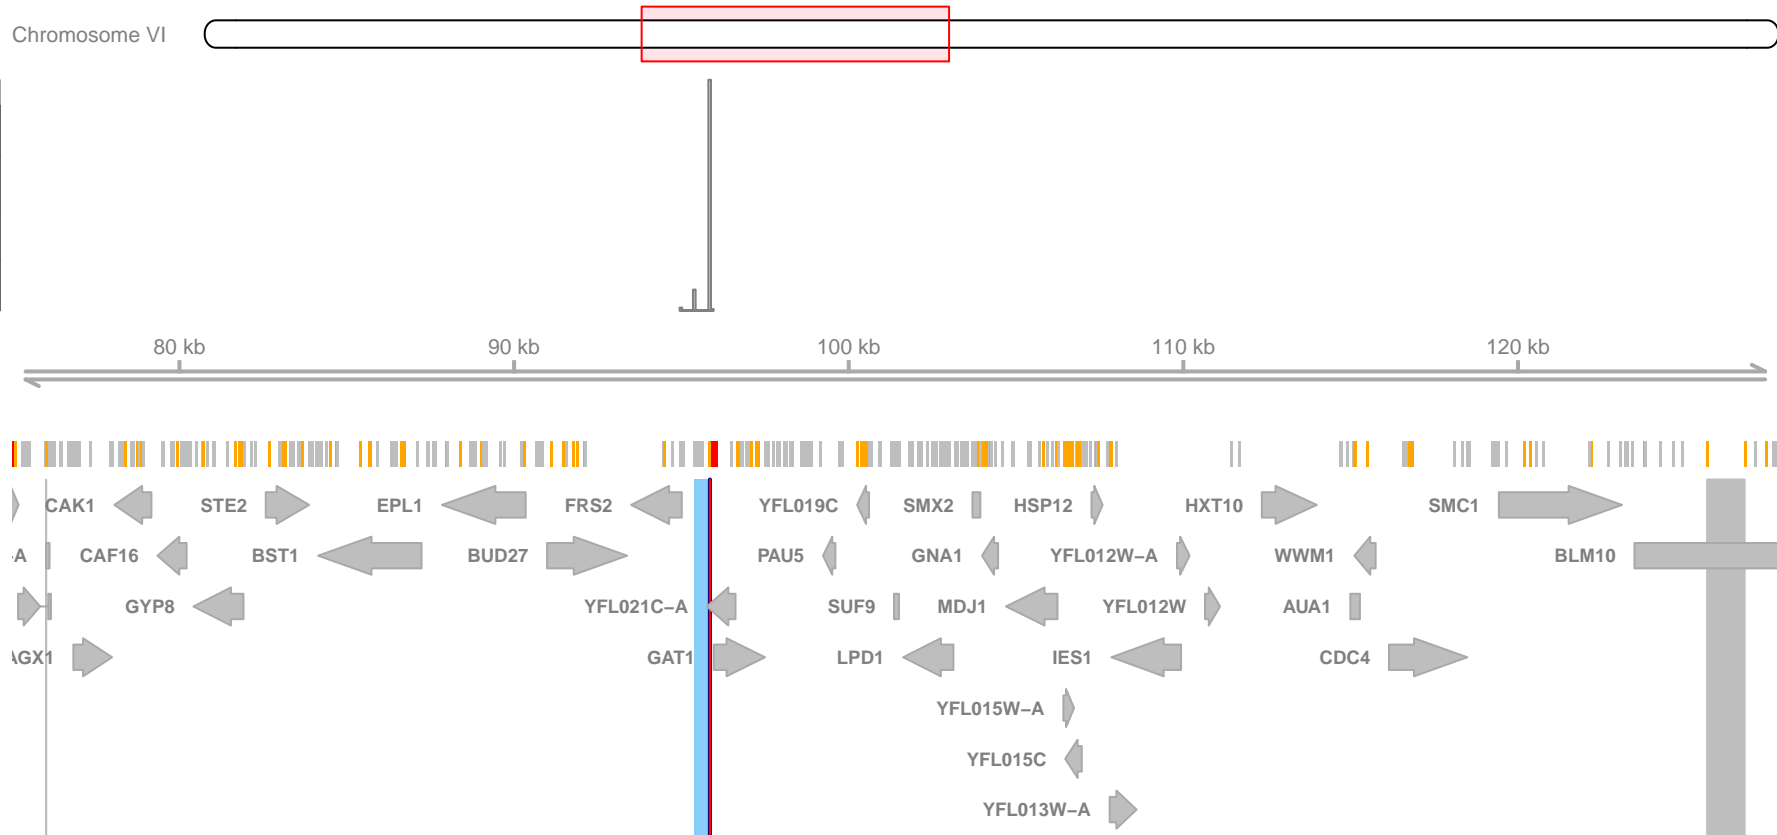

# chrVI:156375\_T/C; 200 genes affected

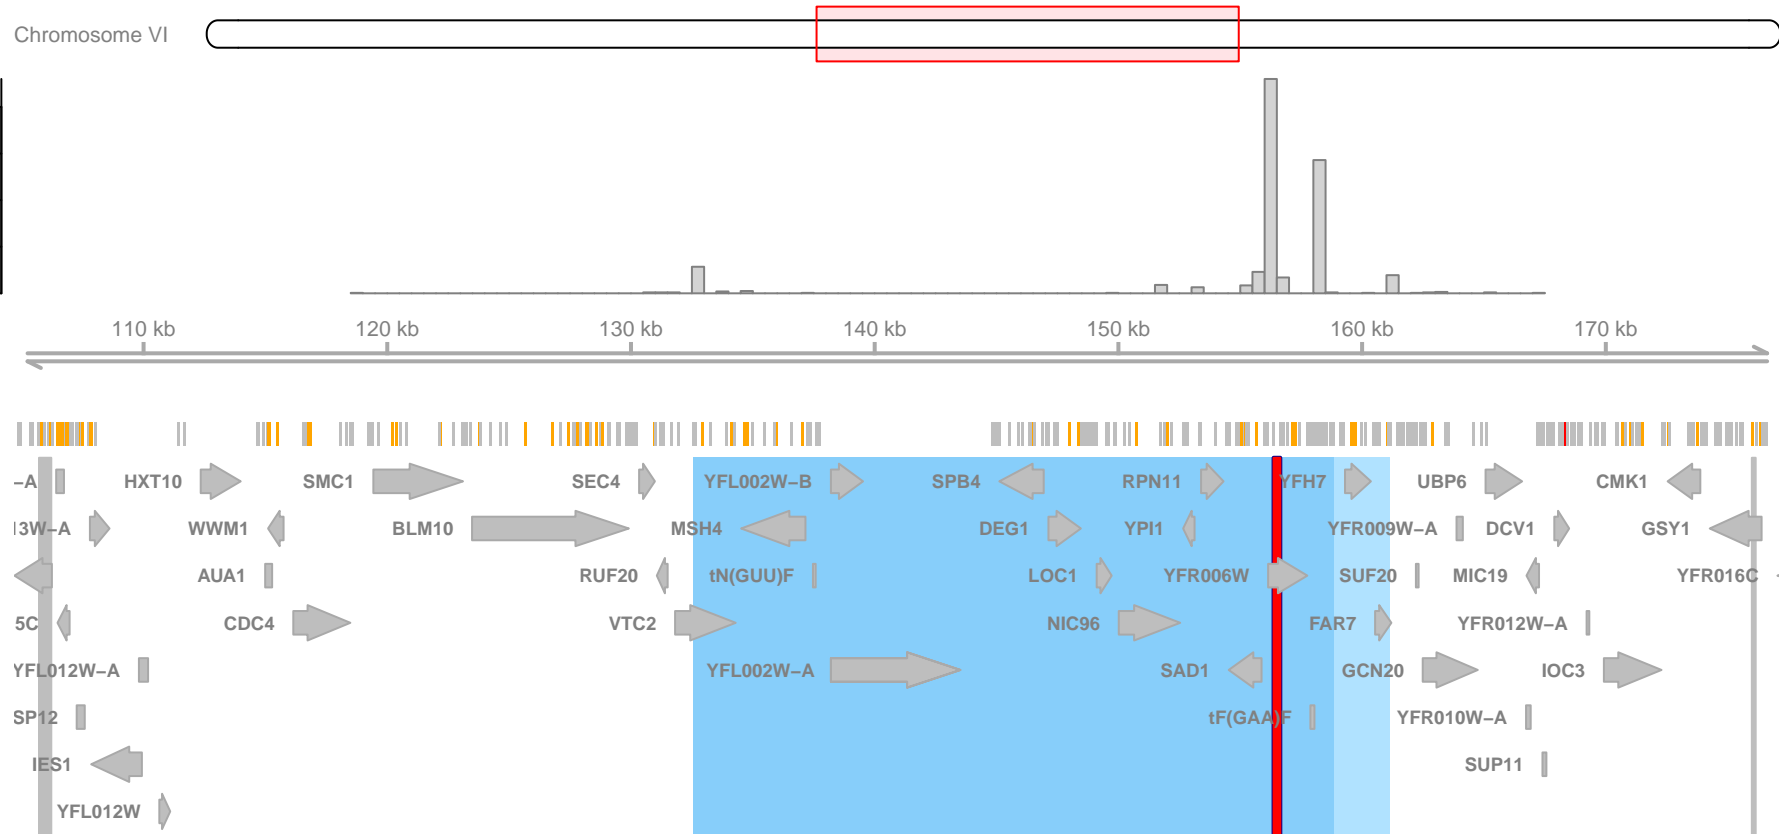

# chrVI:229337\_G/A; 73 genes affected

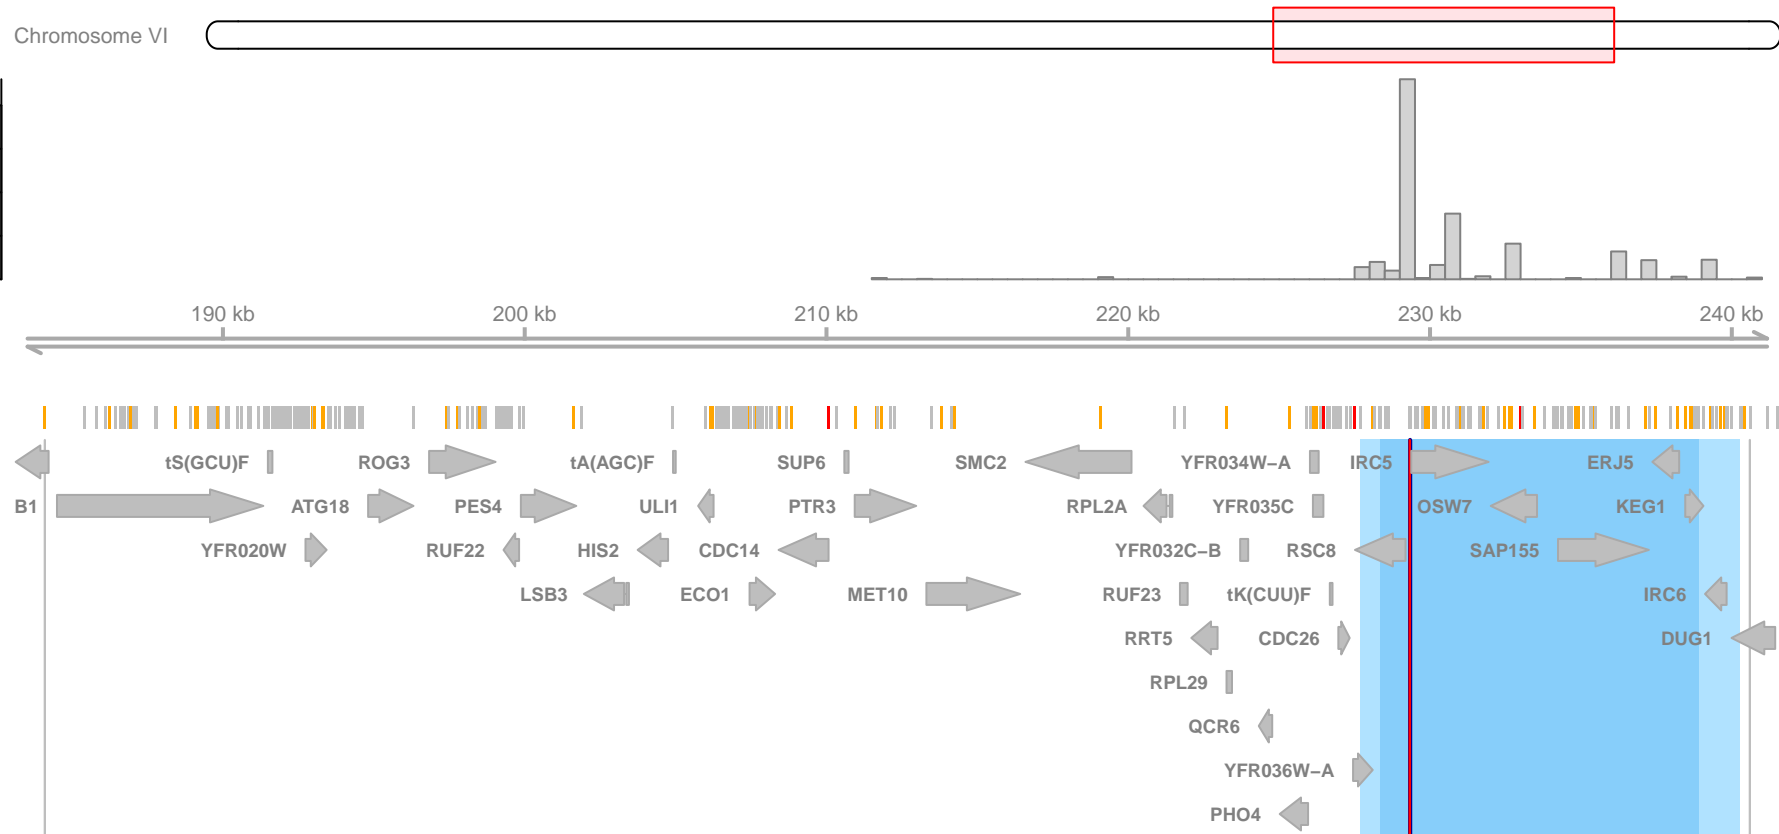

# chrVII:122421\_CA/C; 1581 genes affected

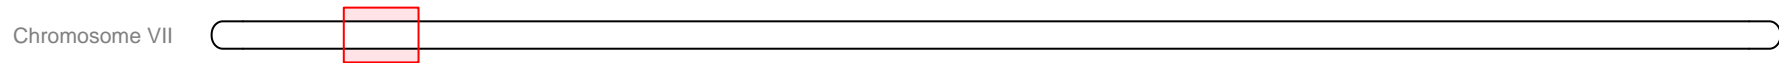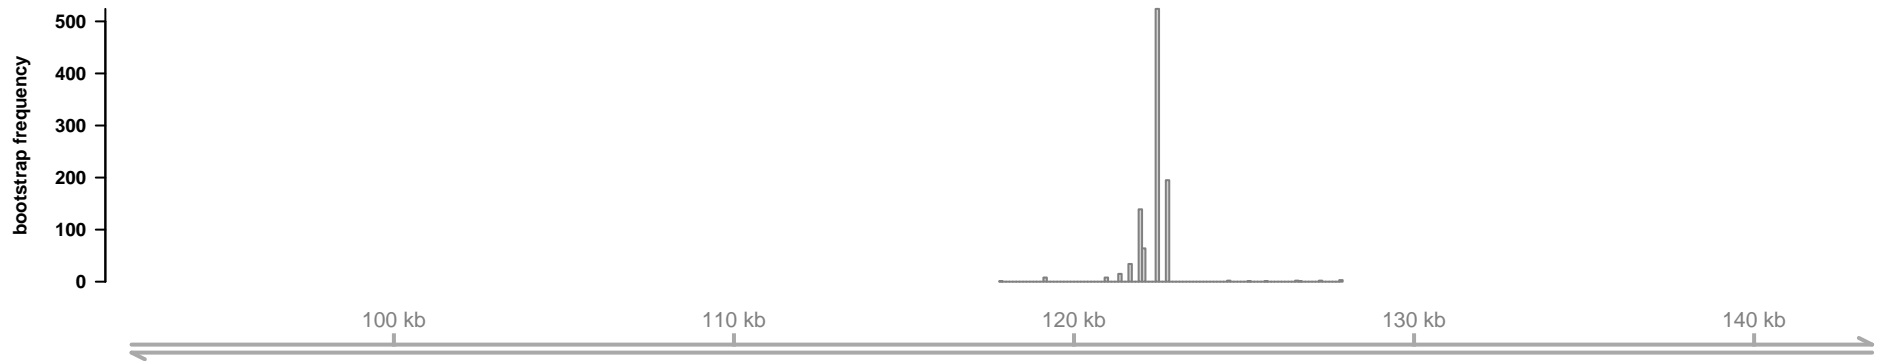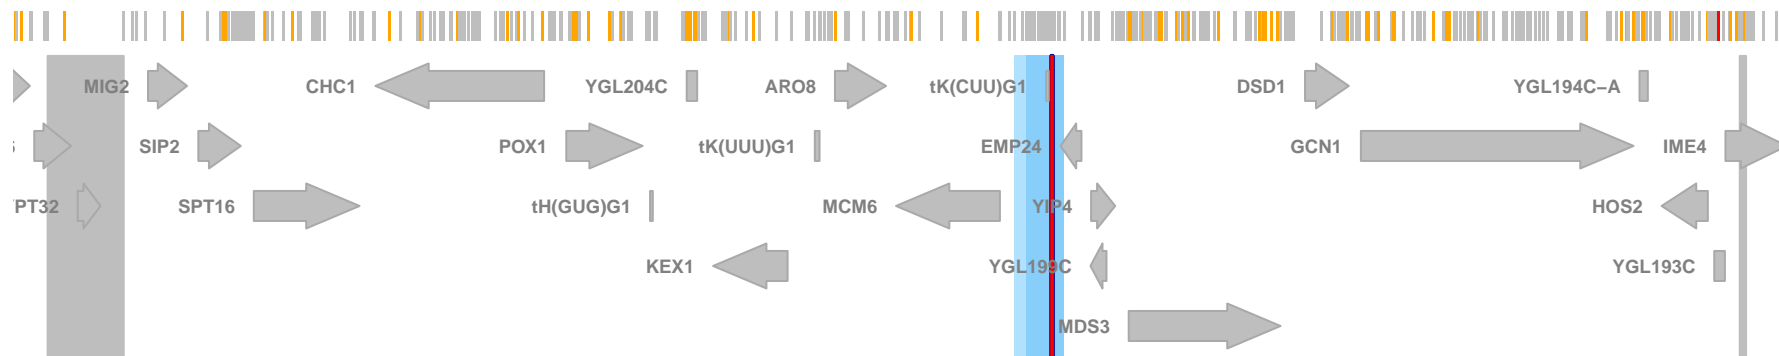

# chrVII:141743\_C/T; 1816 genes affected

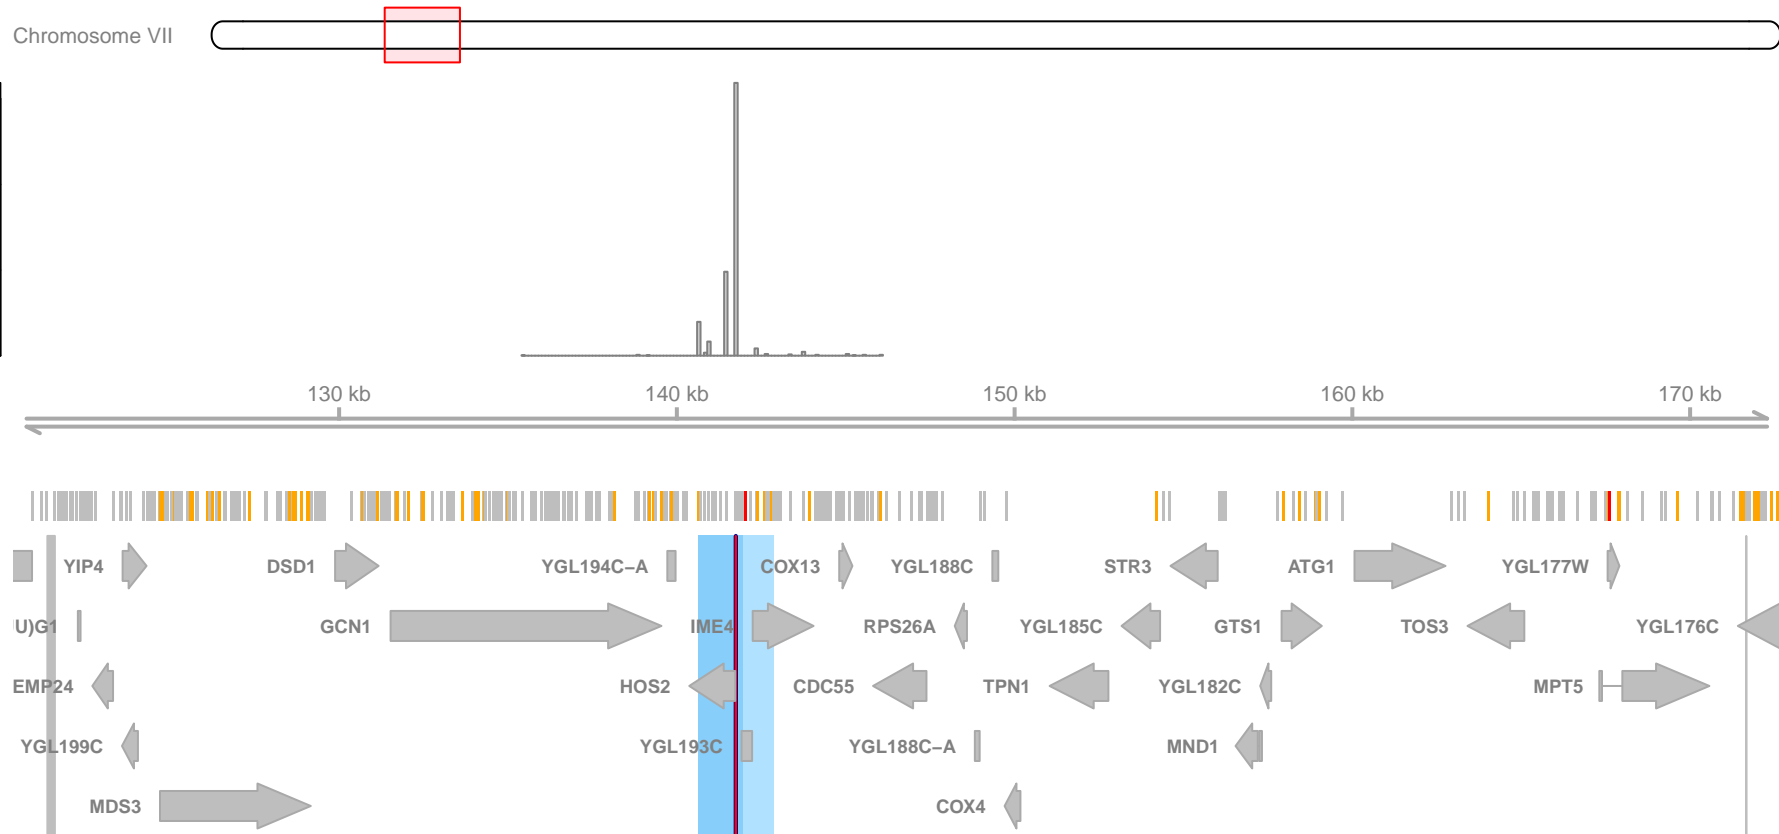

# chrVII:178509\_T/C; 1443 genes affected

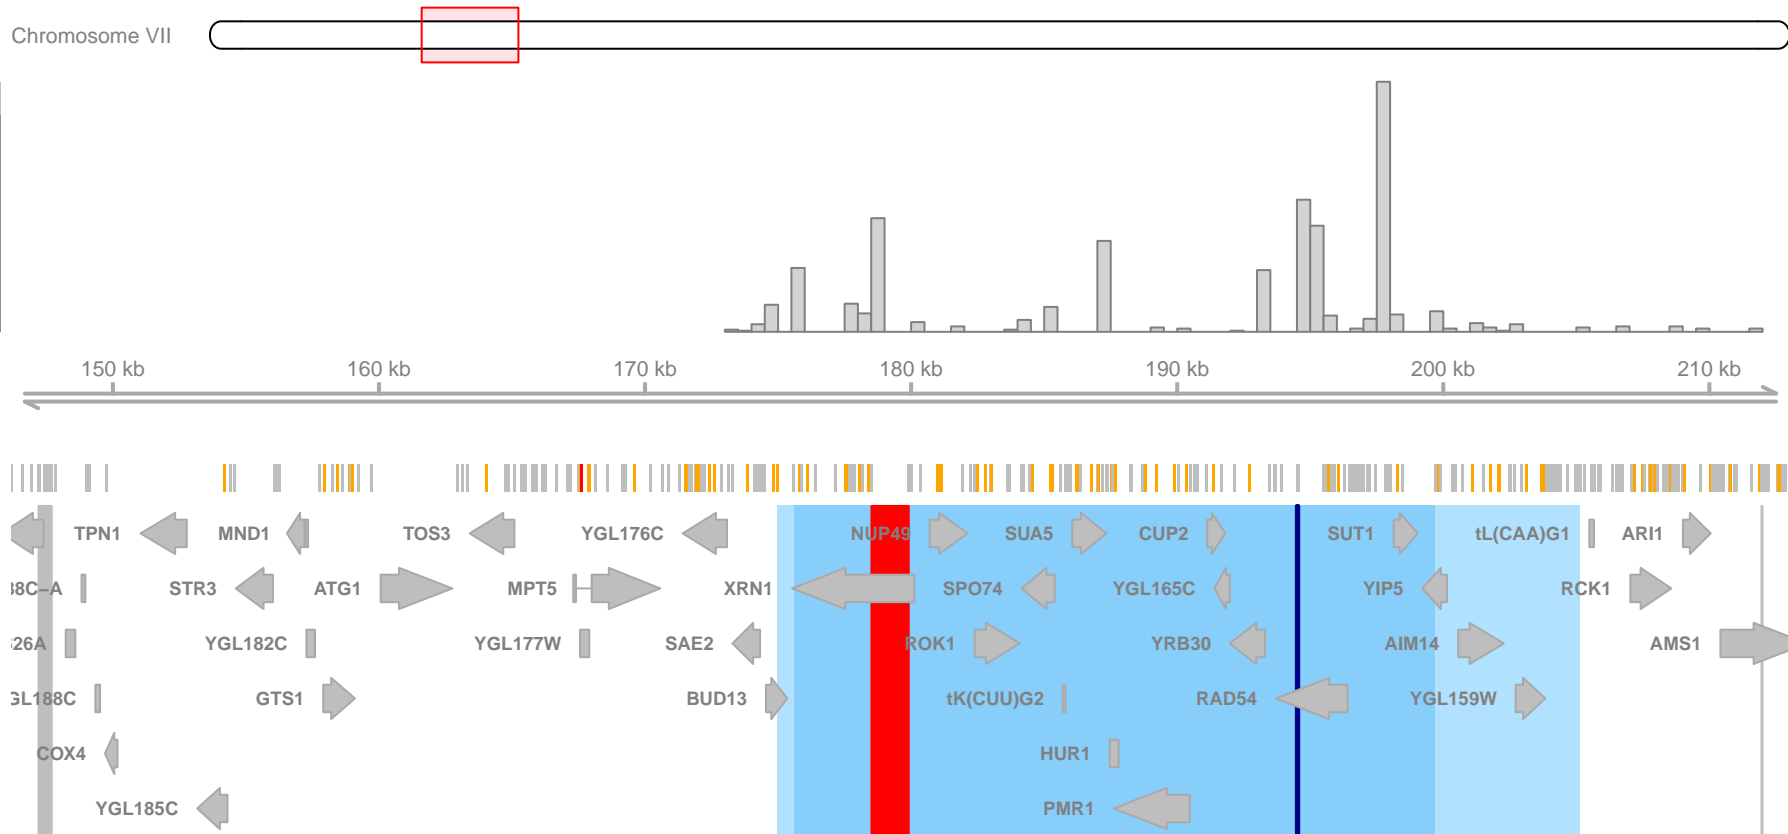

# chrVII:372033\_G/C; 1031 genes affected

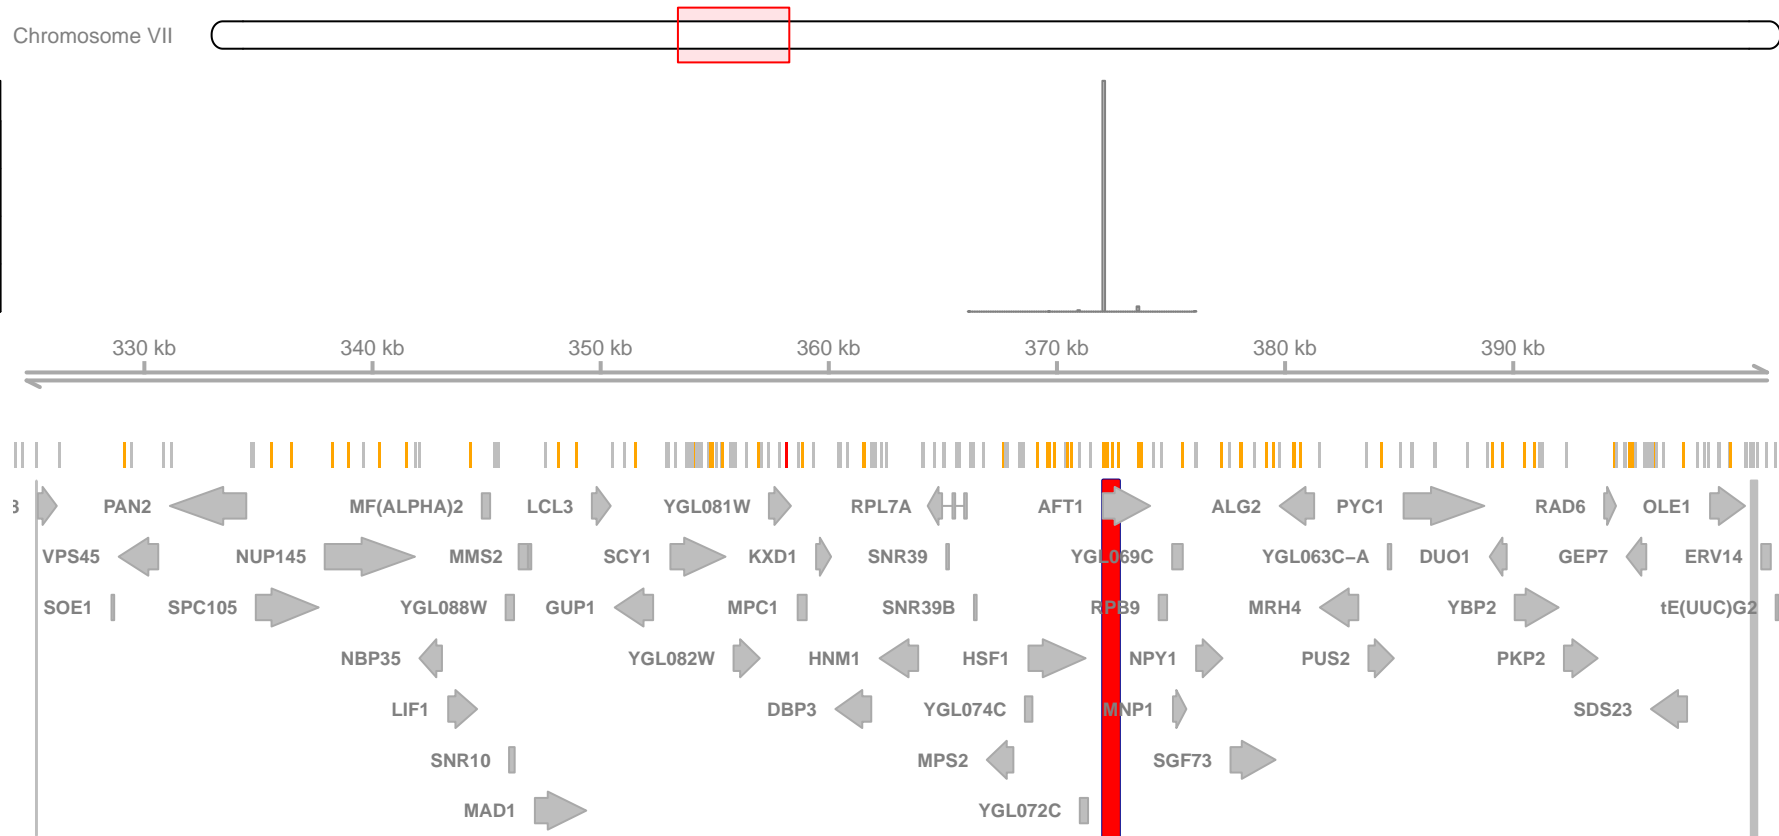

# chrVII:397449\_G/A; 977 genes affected

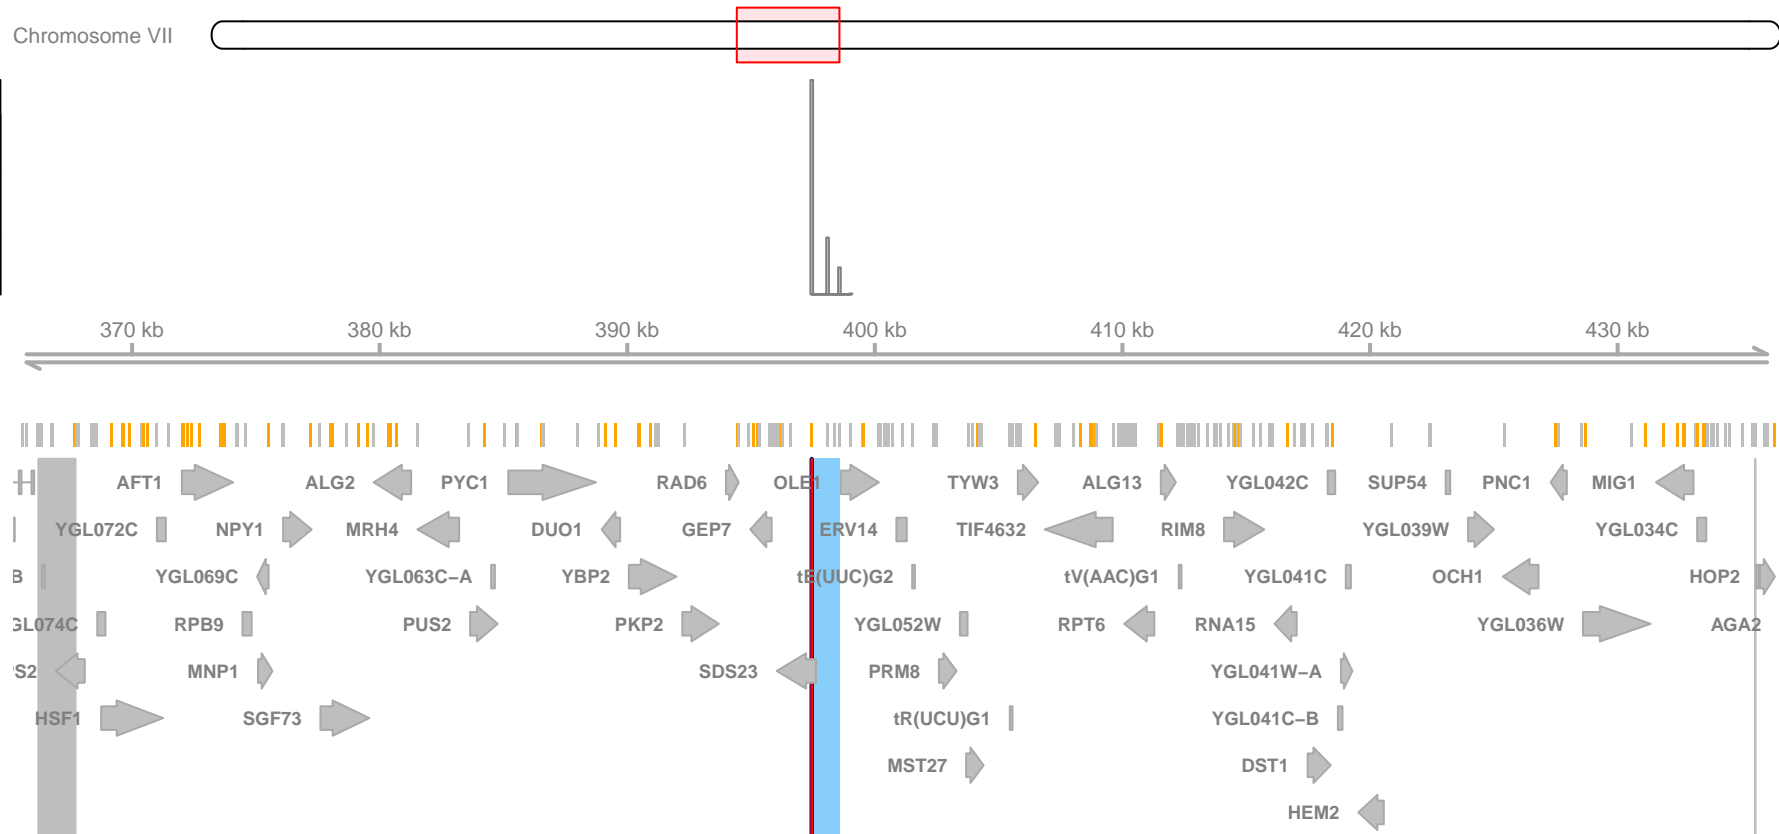



# chrVII:470028\_A/G; 1450 genes affected

Chromosome VII

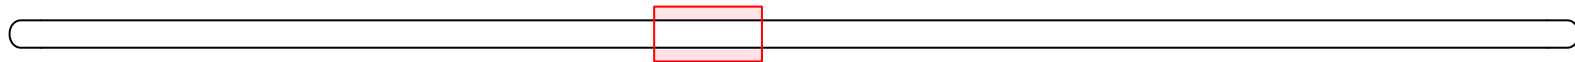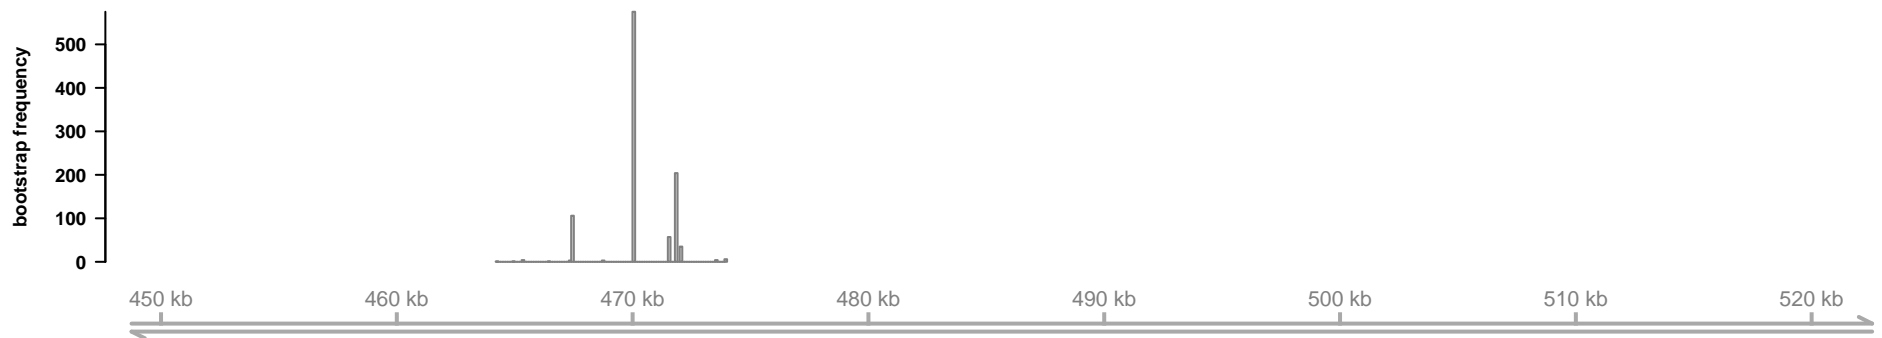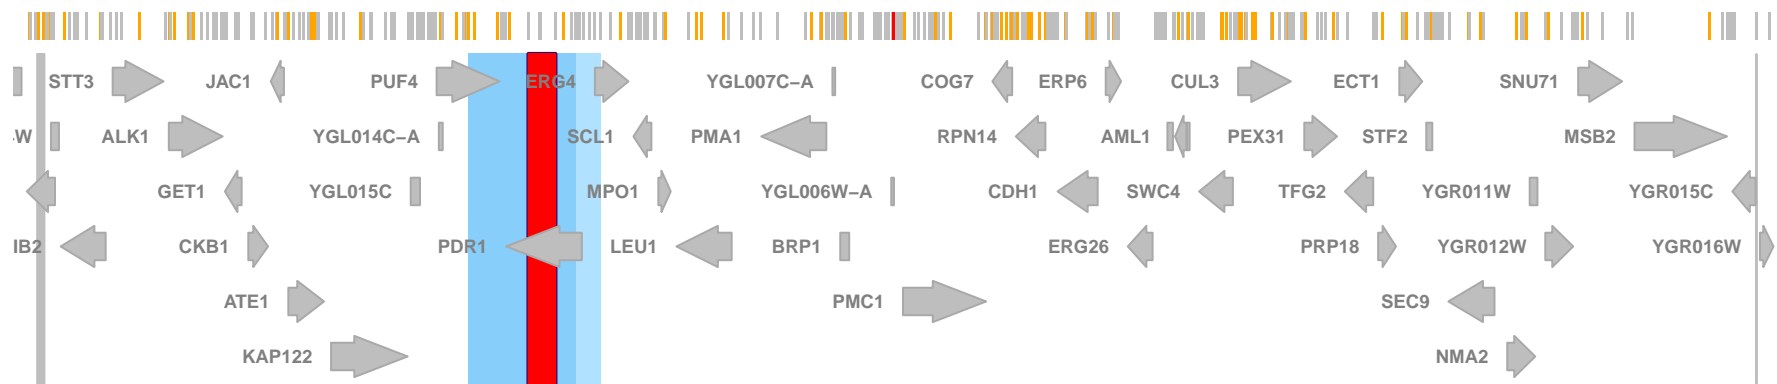

# chrVII:656248\_T/G; 682 genes affected

Chromosome VII

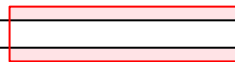

bootstrap frequency

600  
400  
200  
0

650 kb

700 kb

750 kb

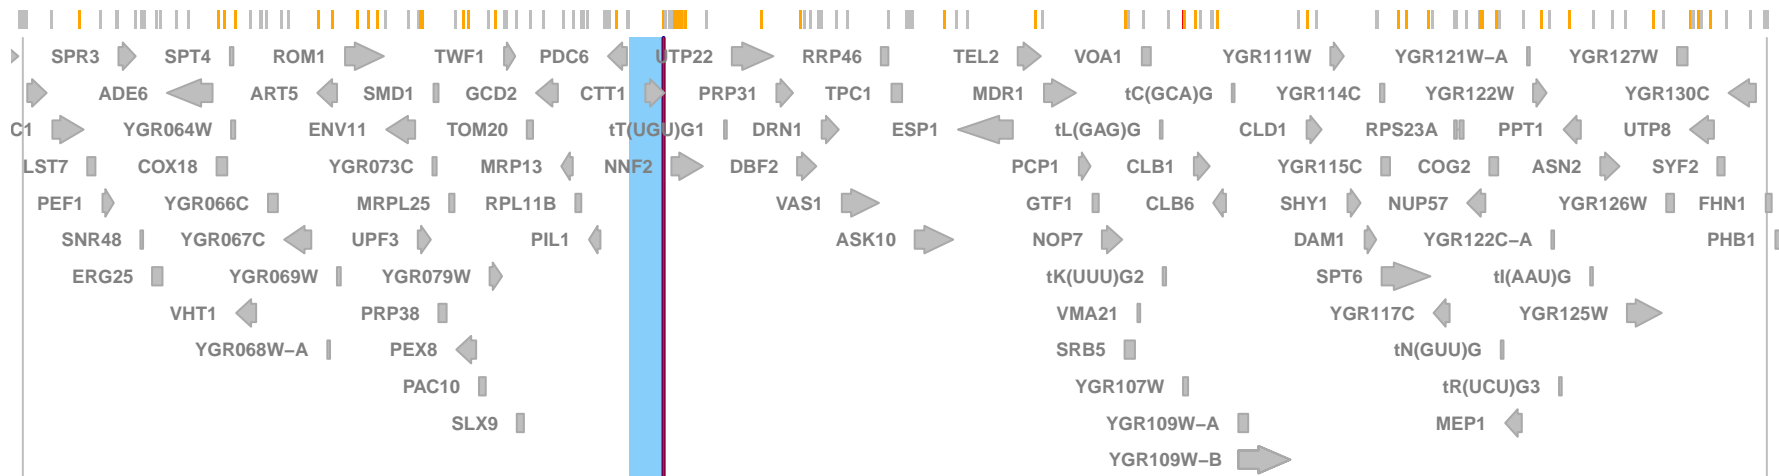

# chrVII:850923\_T/C; 768 genes affected

Chromosome VII

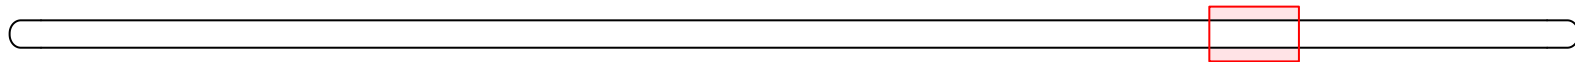

bootstrap frequency

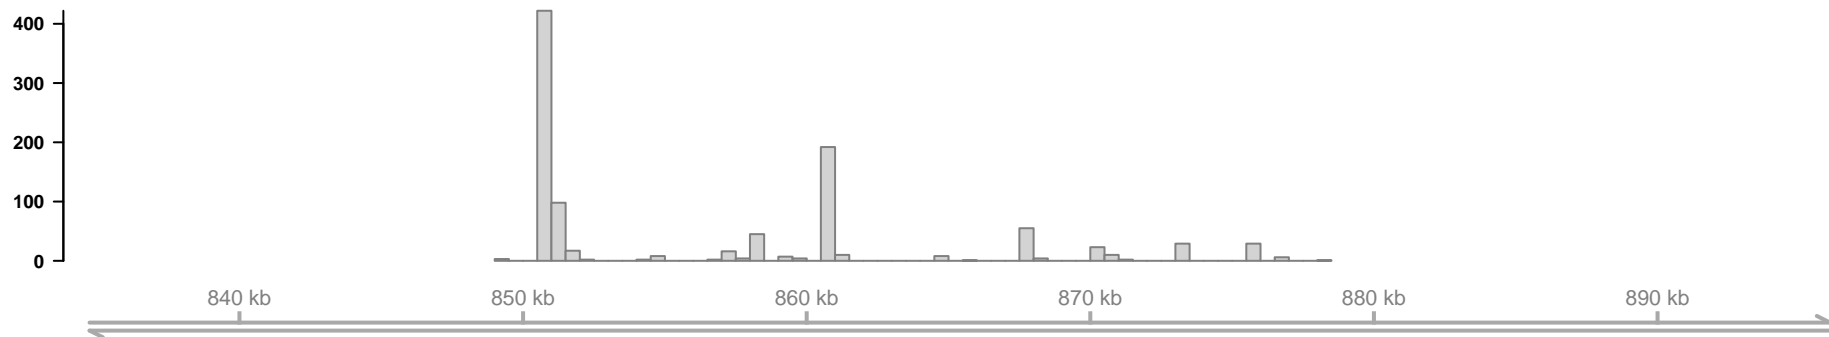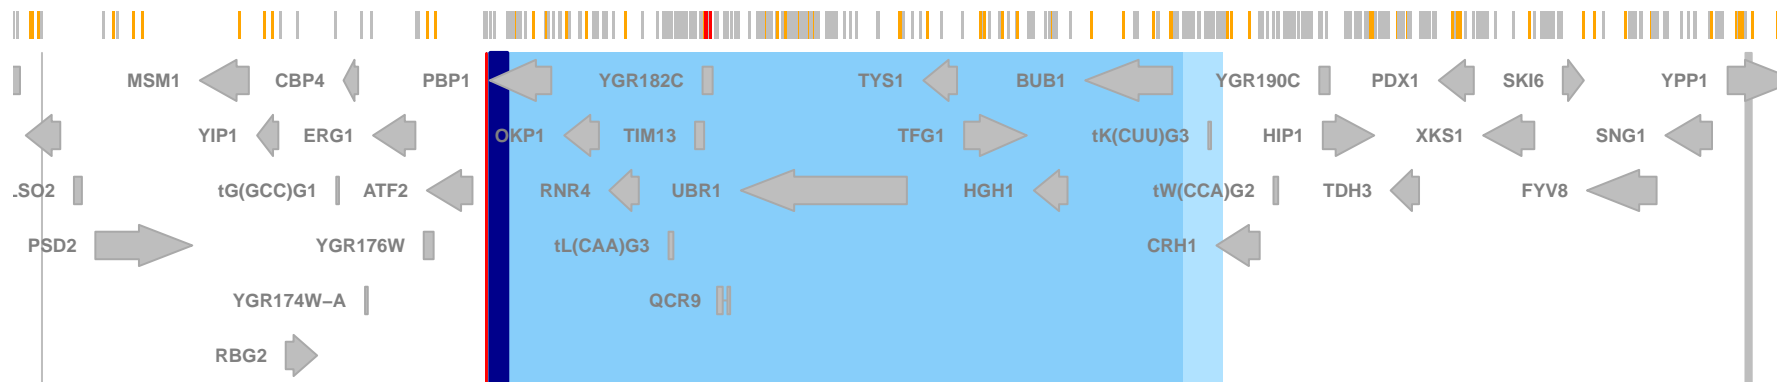

# chrVII:984362\_C/T; 724 genes affected

Chromosome VII

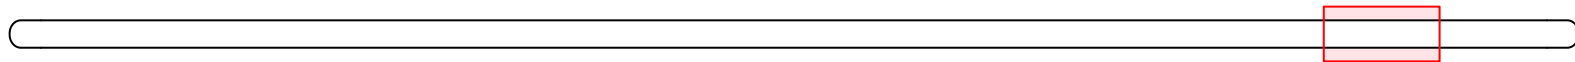

bootstrap frequency

600  
500  
400  
300  
200  
100  
0

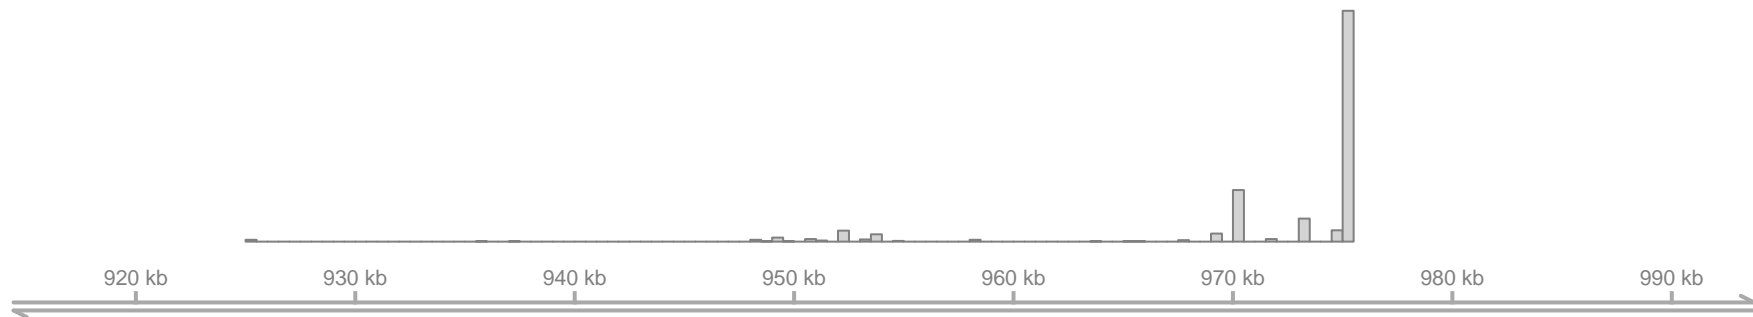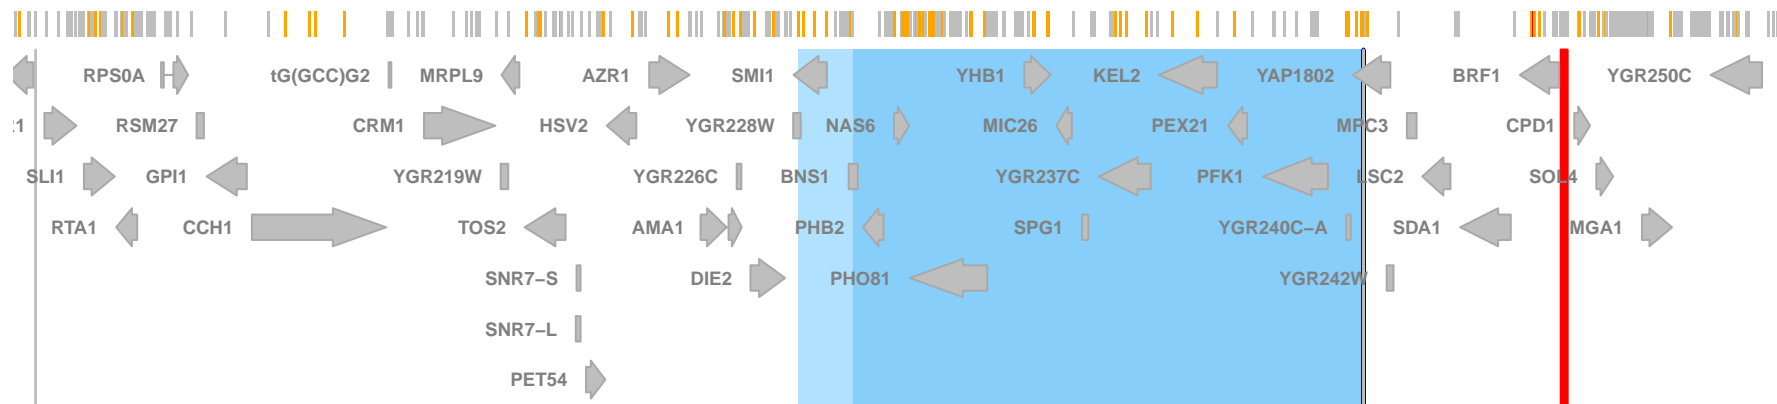

# chrVIII:104423\_C/A; 1029 genes affected

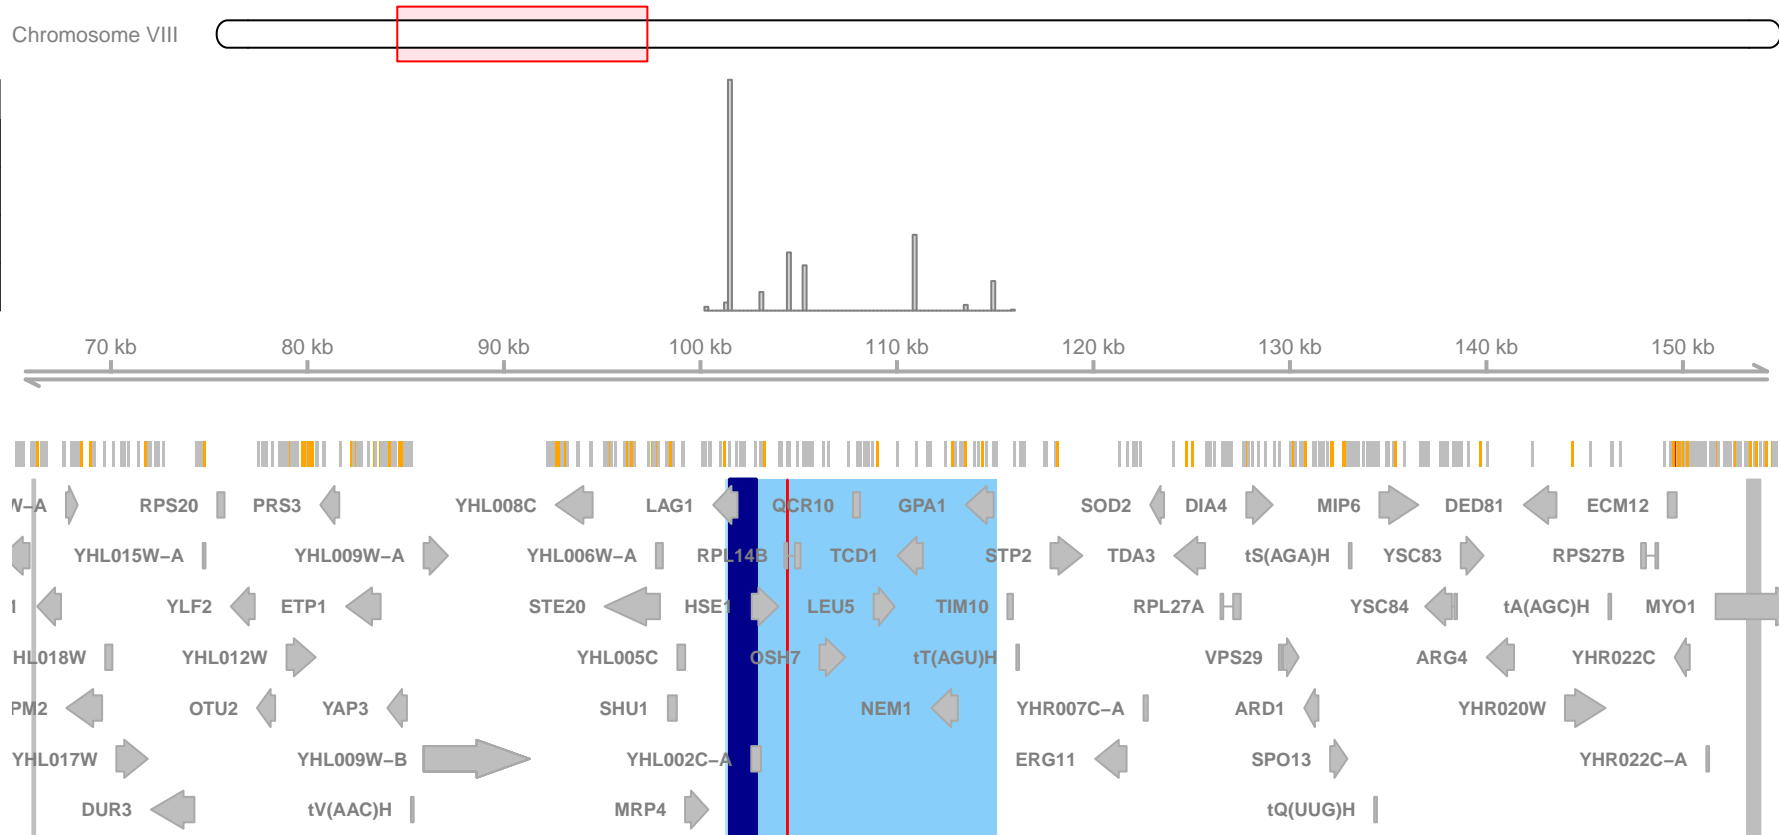

# chrVIII:175012\_C/T; 653 genes affected

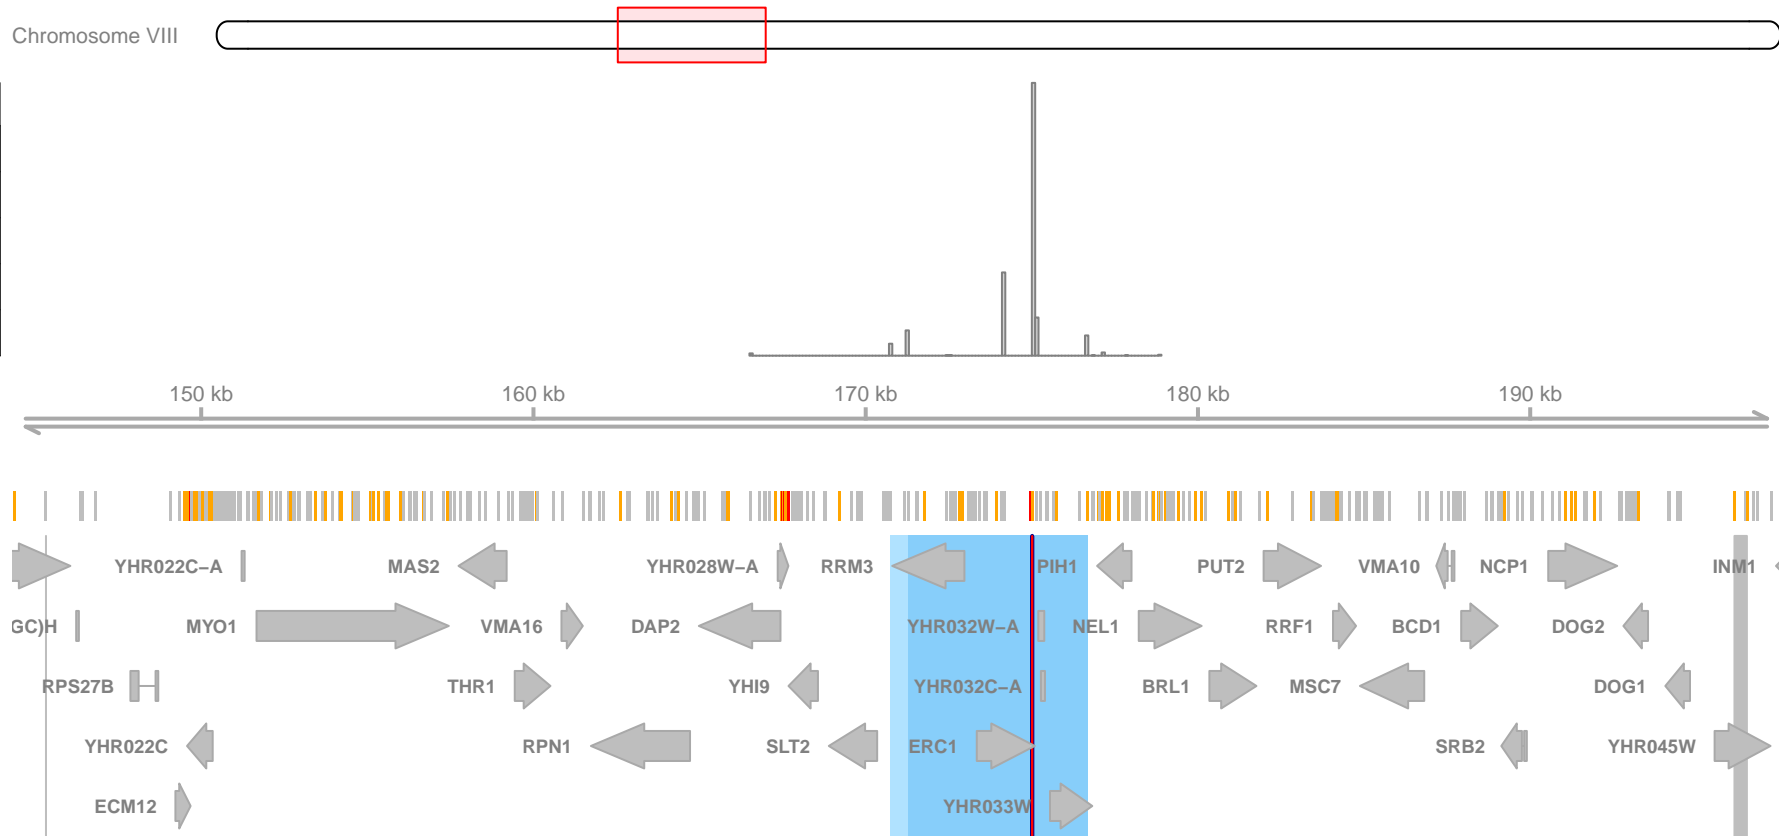

# chrVIII:459310\_C/G; 402 genes affected

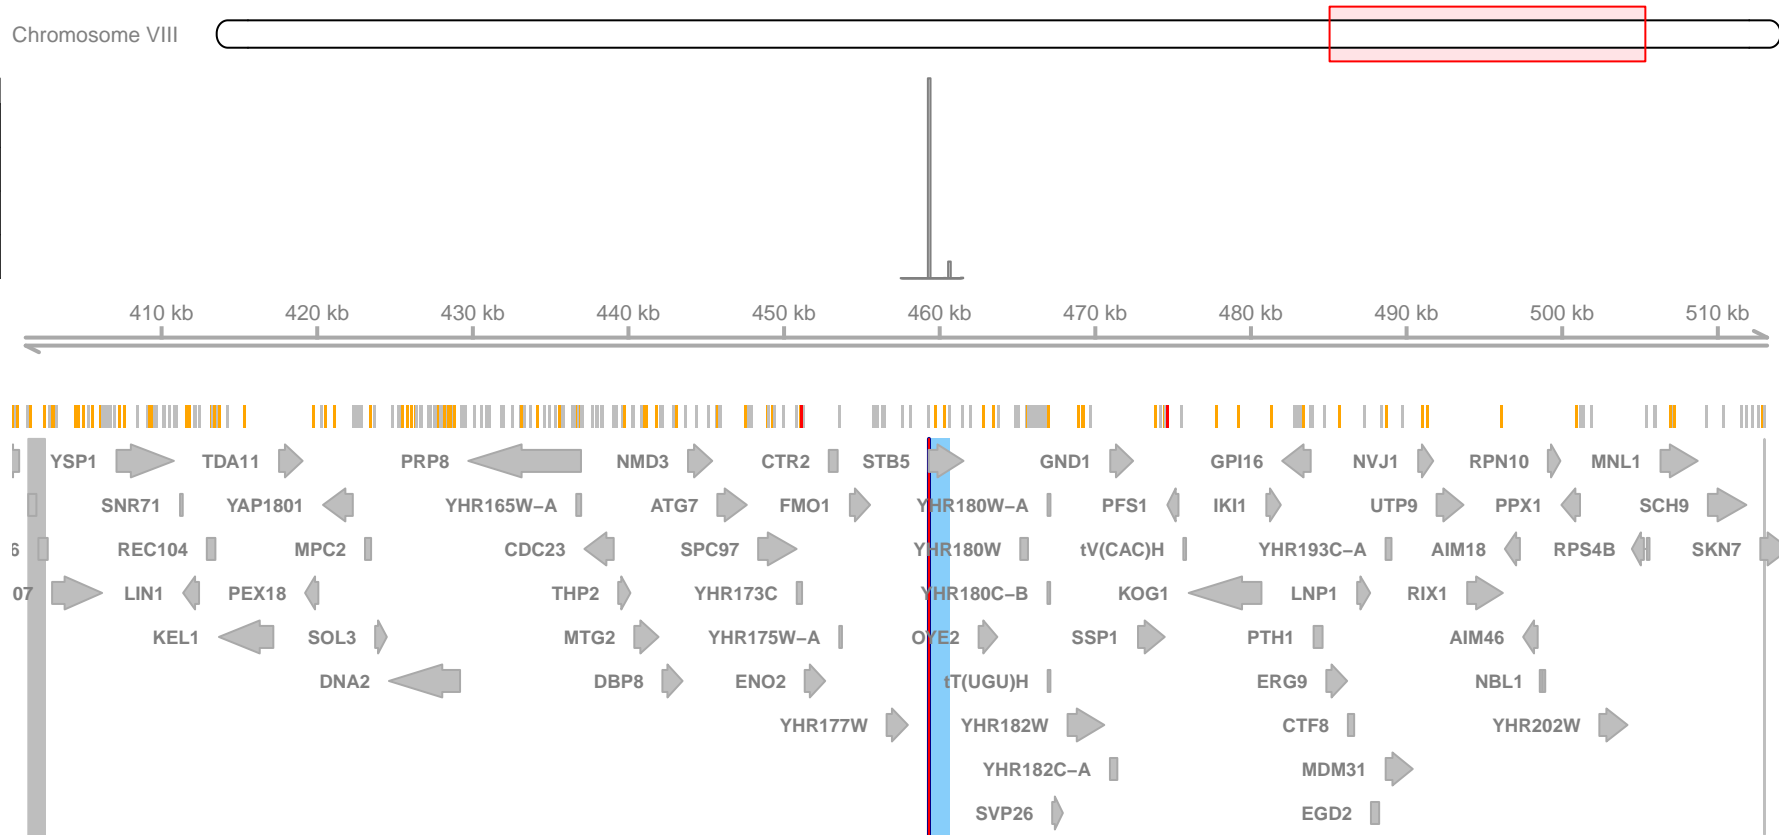

# chrIX:28874\_G/C; 83 genes affected

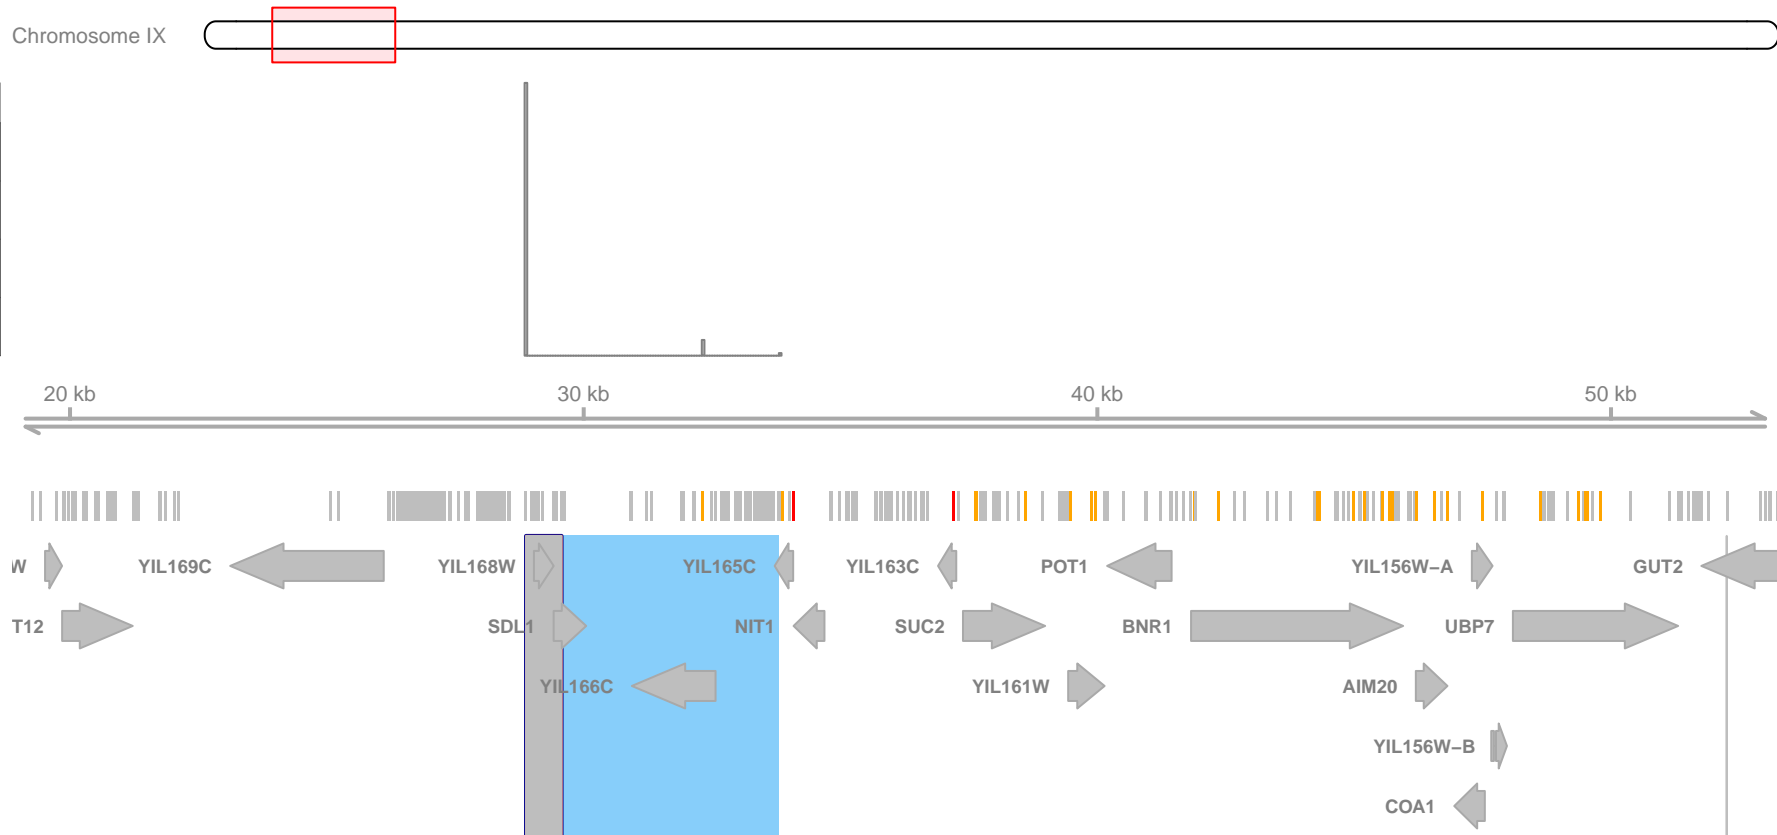



# chrIX:105090\_T/C; 592 genes affected

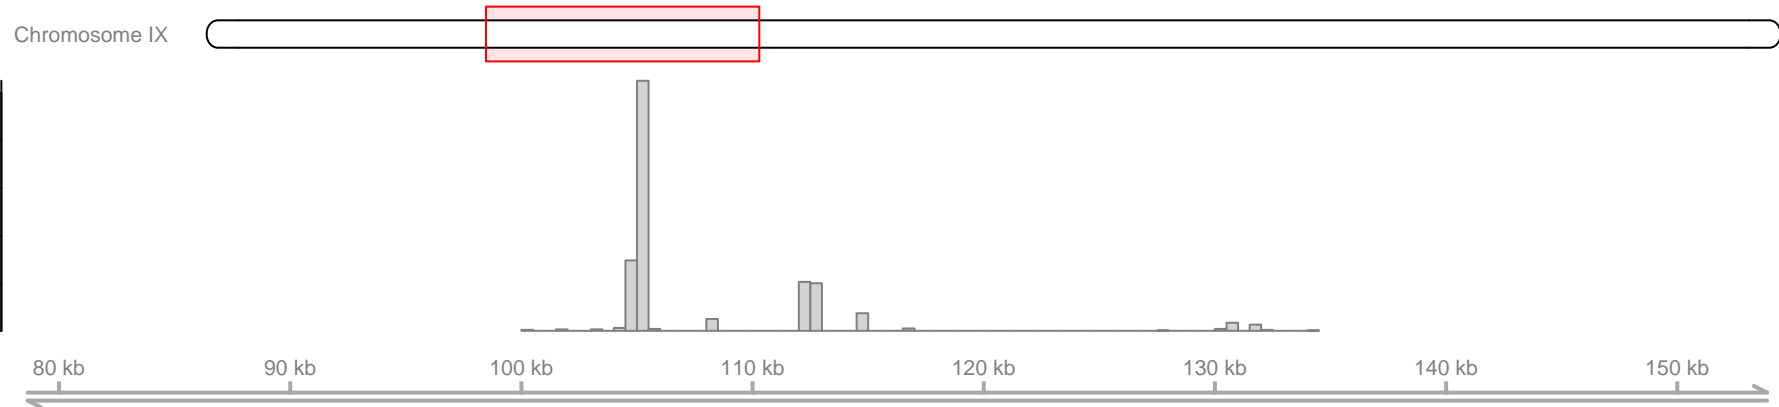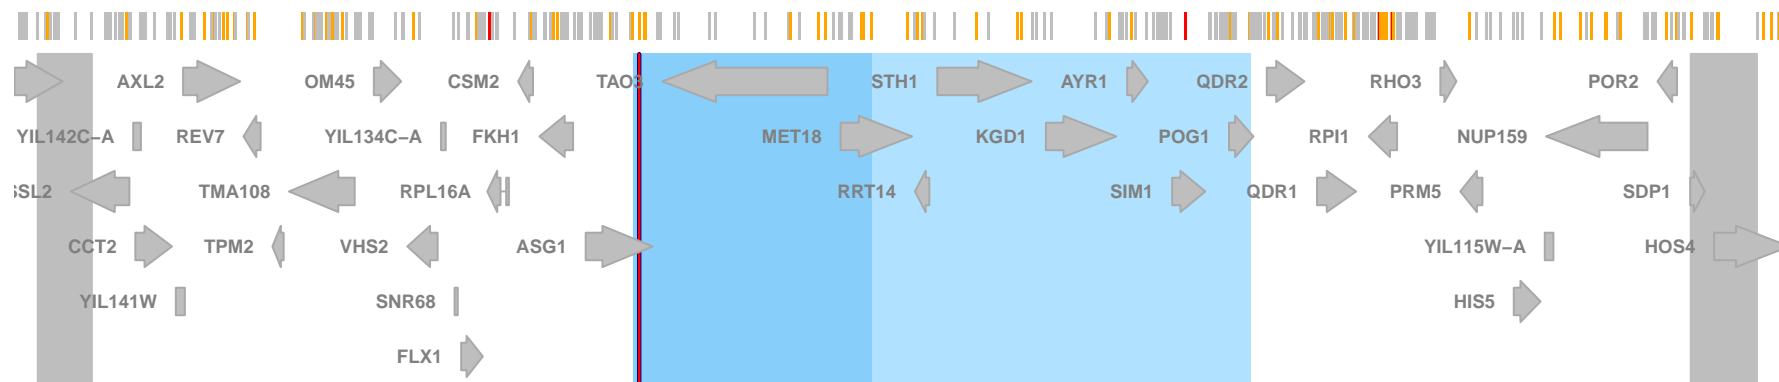





# chrIX:386051\_A/G; 79 genes affected

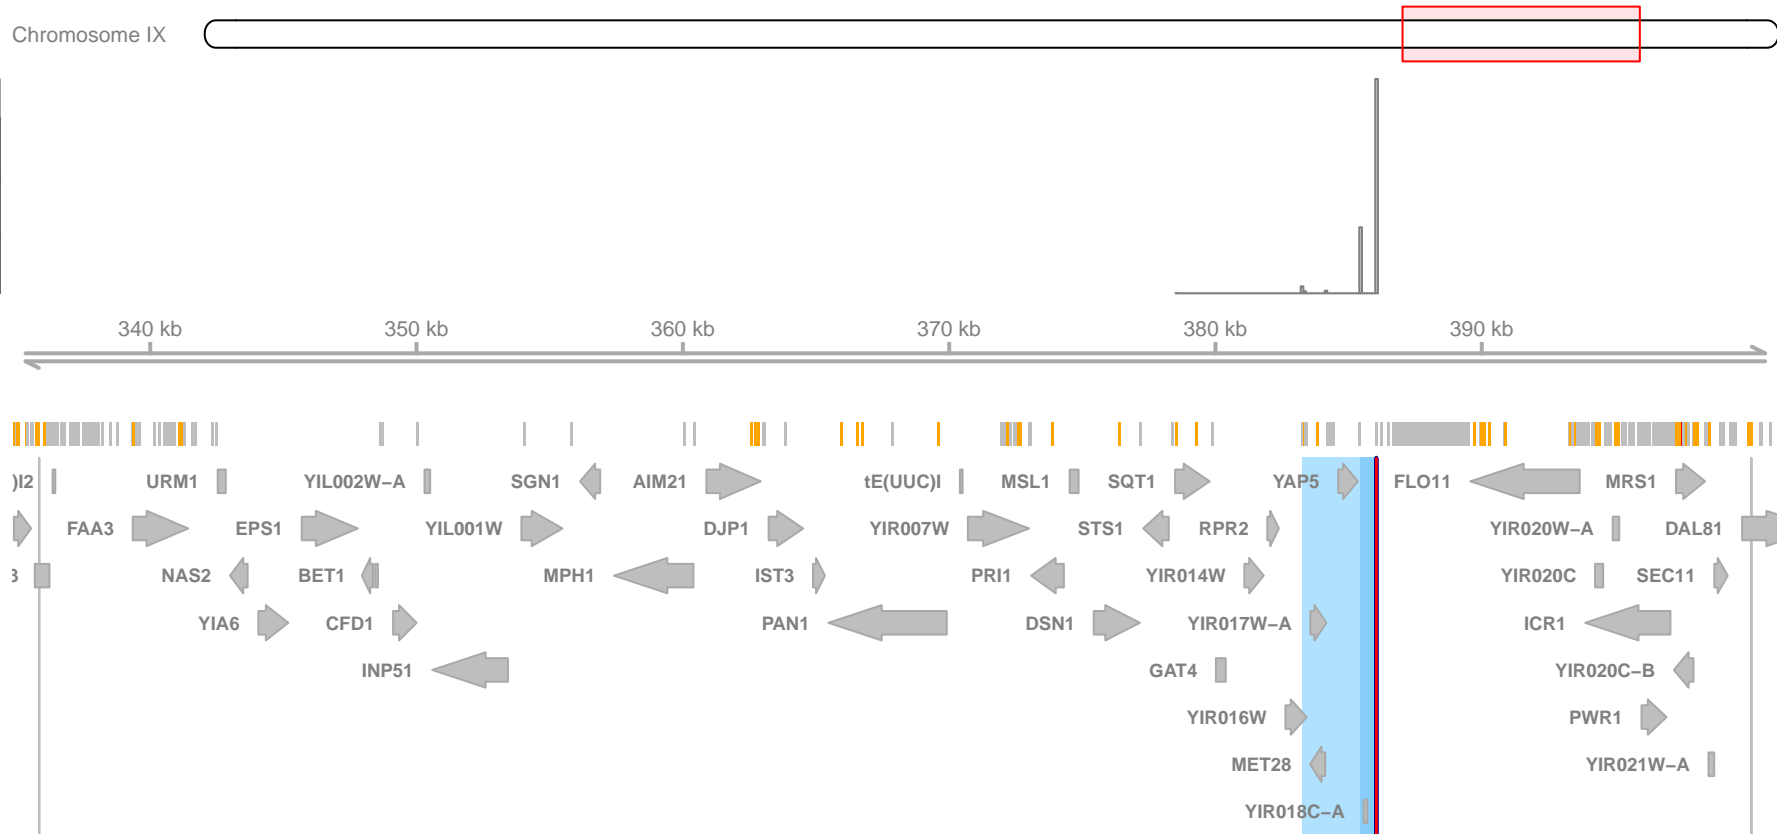

# chrX:26108\_C/T; 180 genes affected

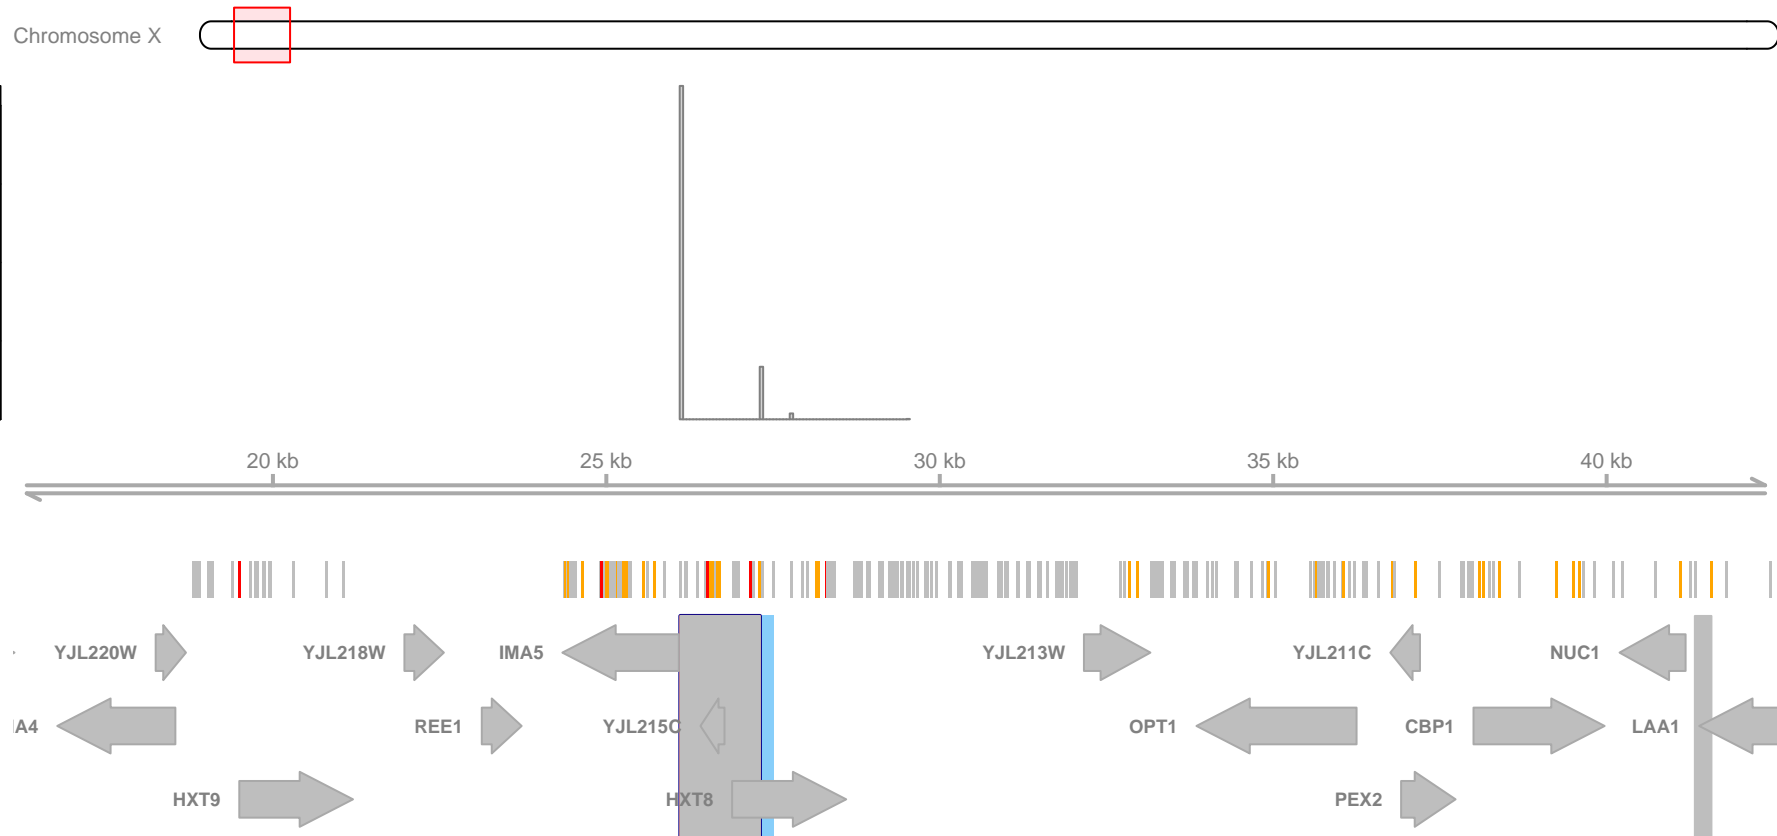

# chrX:108904\_A/G; 436 genes affected

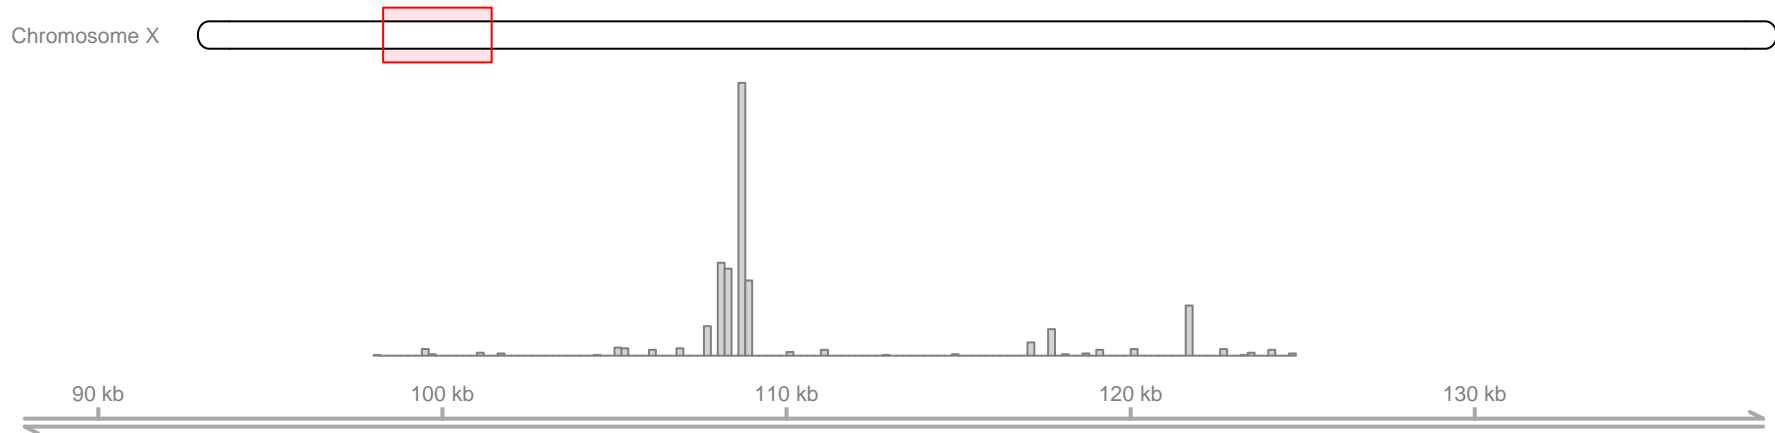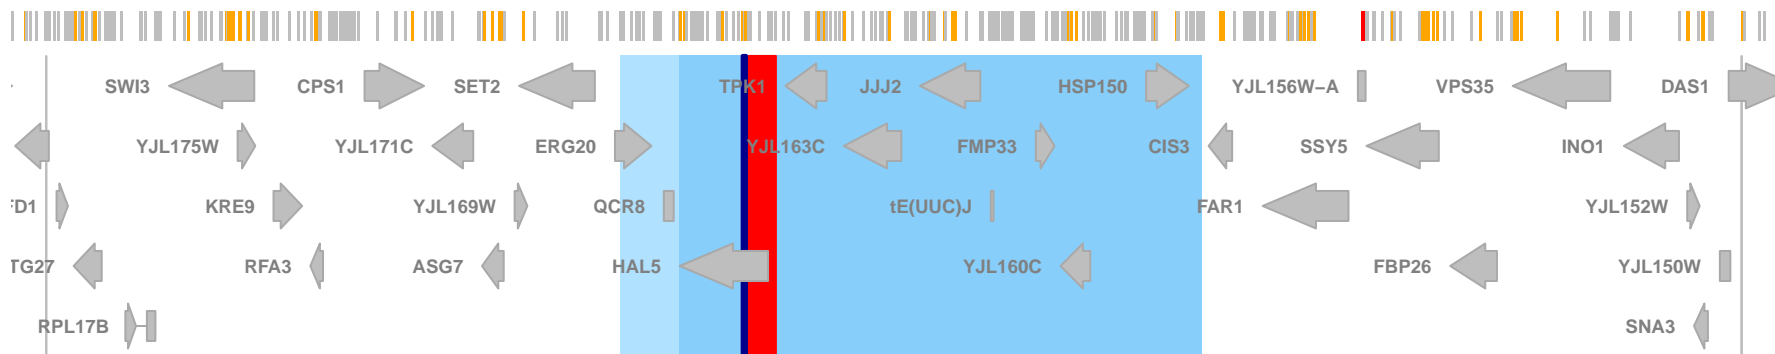

# chrX:181214\_T/C; 411 genes affected

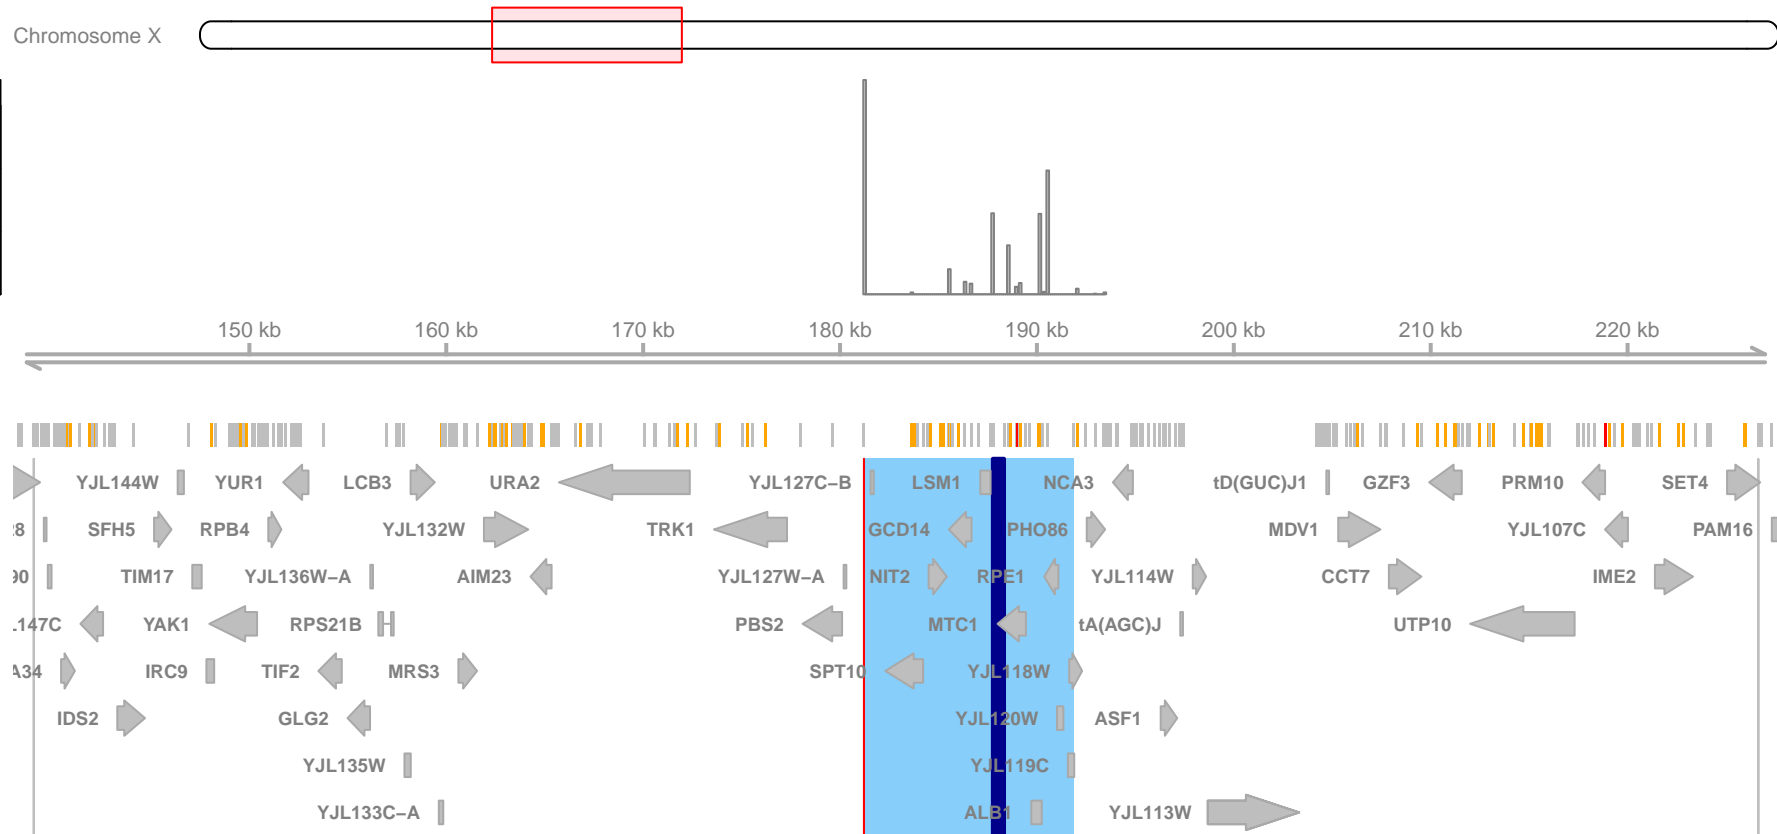

# chrX:330144\_C/T; 229 genes affected

Chromosome X

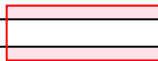

bootstrap frequency

400  
300  
200  
100  
0

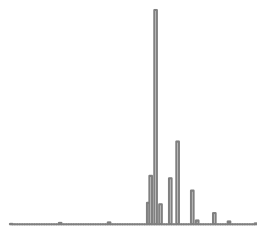

290 kb

300 kb

310 kb

320 kb

330 kb

340 kb

350 kb

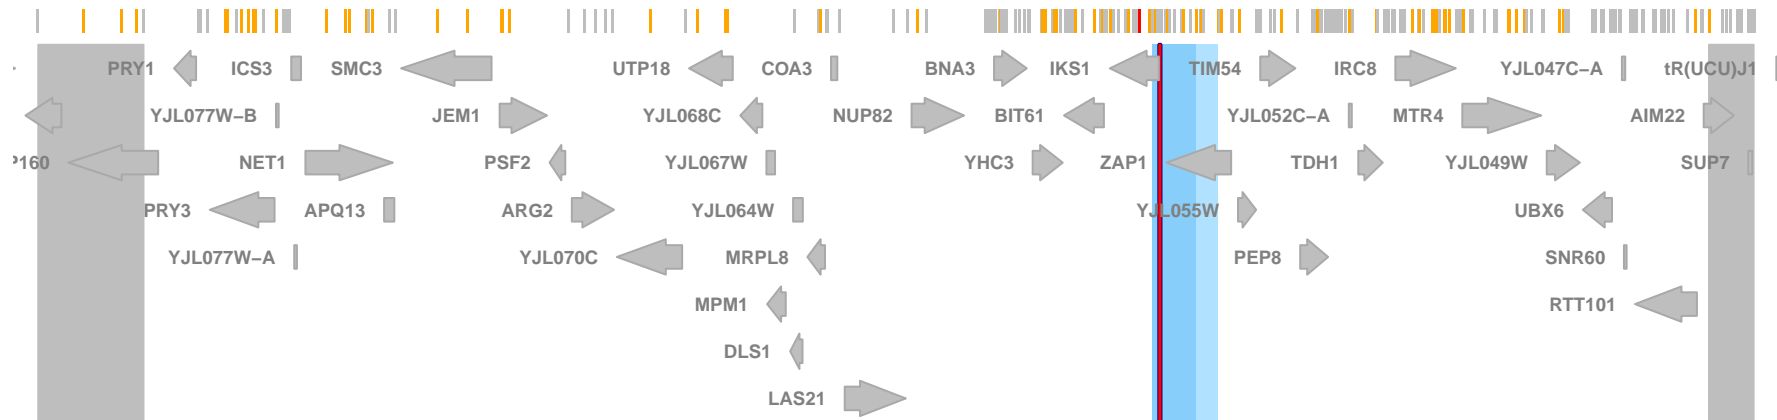



# chrX:426287\_C/A; 321 genes affected

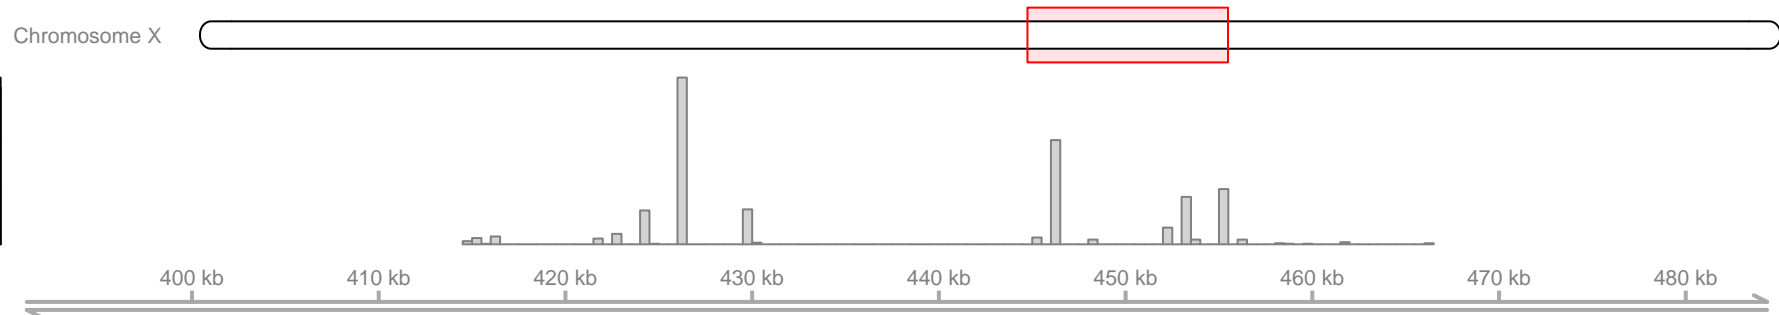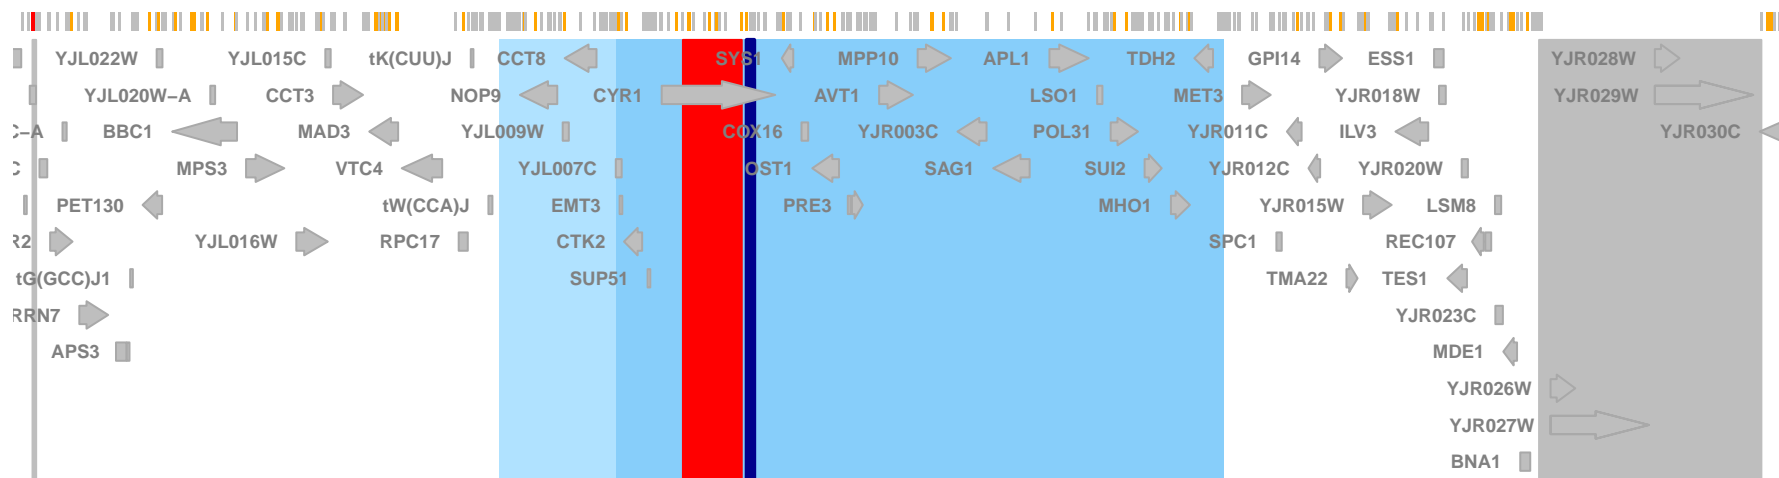

# chrX:548174\_T/C; 380 genes affected

Chromosome X

bootstrap frequency

600  
400  
200  
0

510 kb

520 kb

530 kb

540 kb

550 kb

560 kb

570 kb

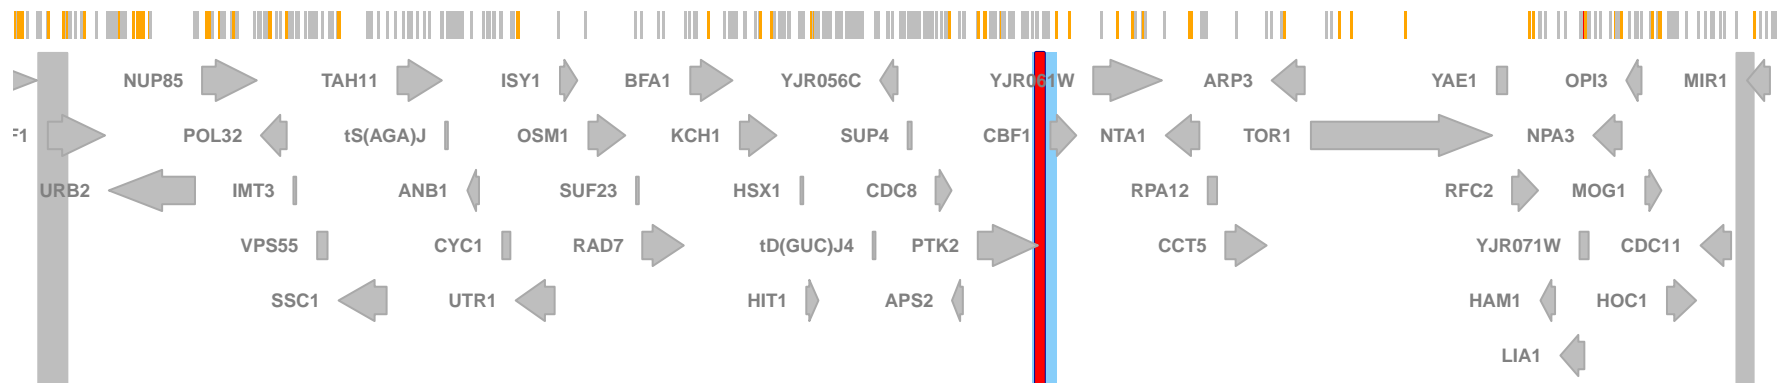

# chrX:659425\_T/C; 831 genes affected

Chromosome X

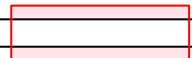

bootstrap frequency

500  
400  
300  
200  
100  
0

630 kb

640 kb

650 kb

660 kb

670 kb

680 kb

690 kb

700 kb

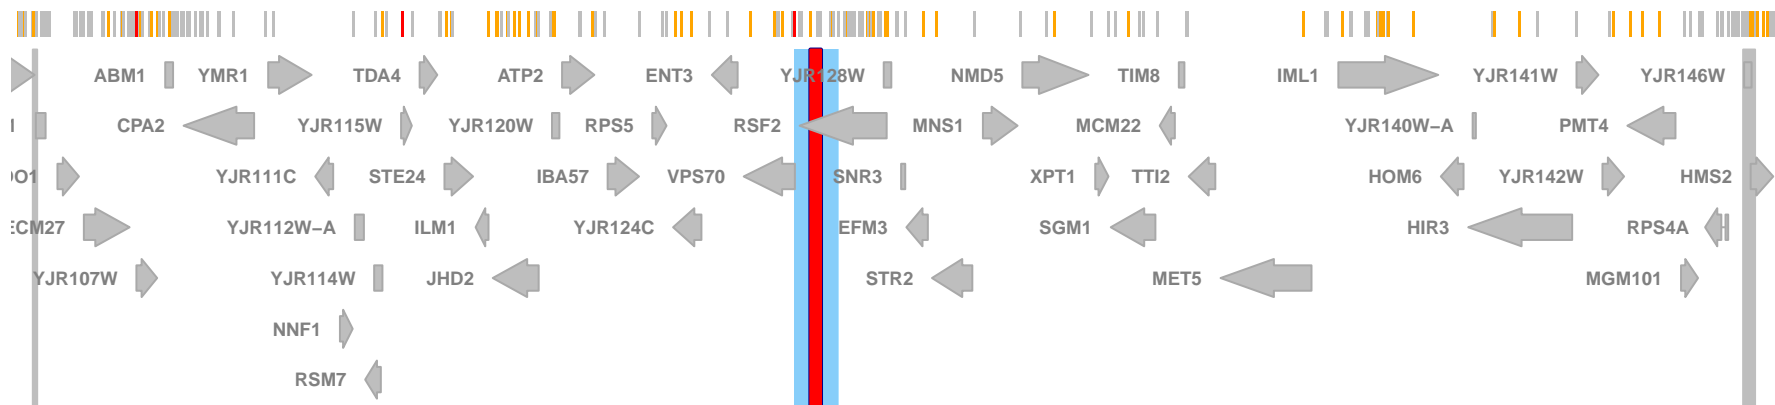

# chrX:722130\_T/C; 181 genes affected

Chromosome X

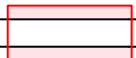

bootstrap frequency

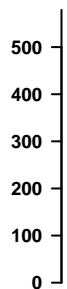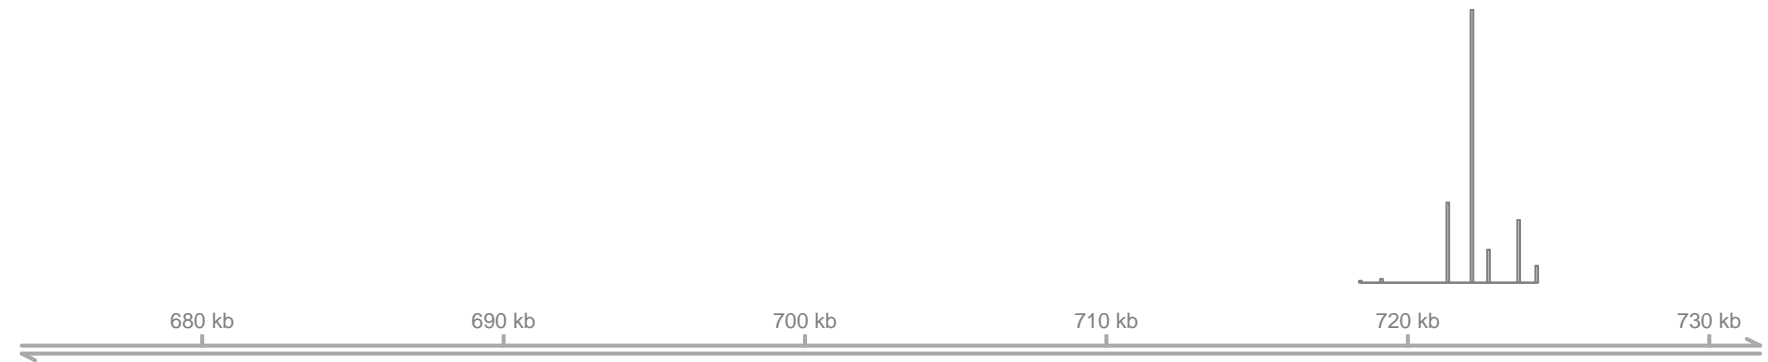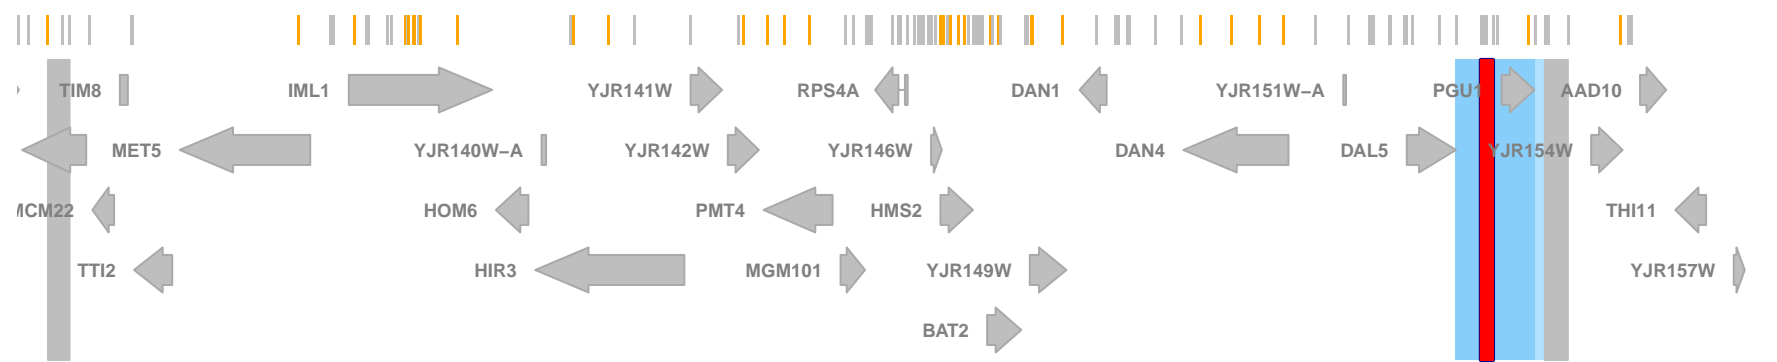

# chrXI:4534\_G/A; 123 genes affected

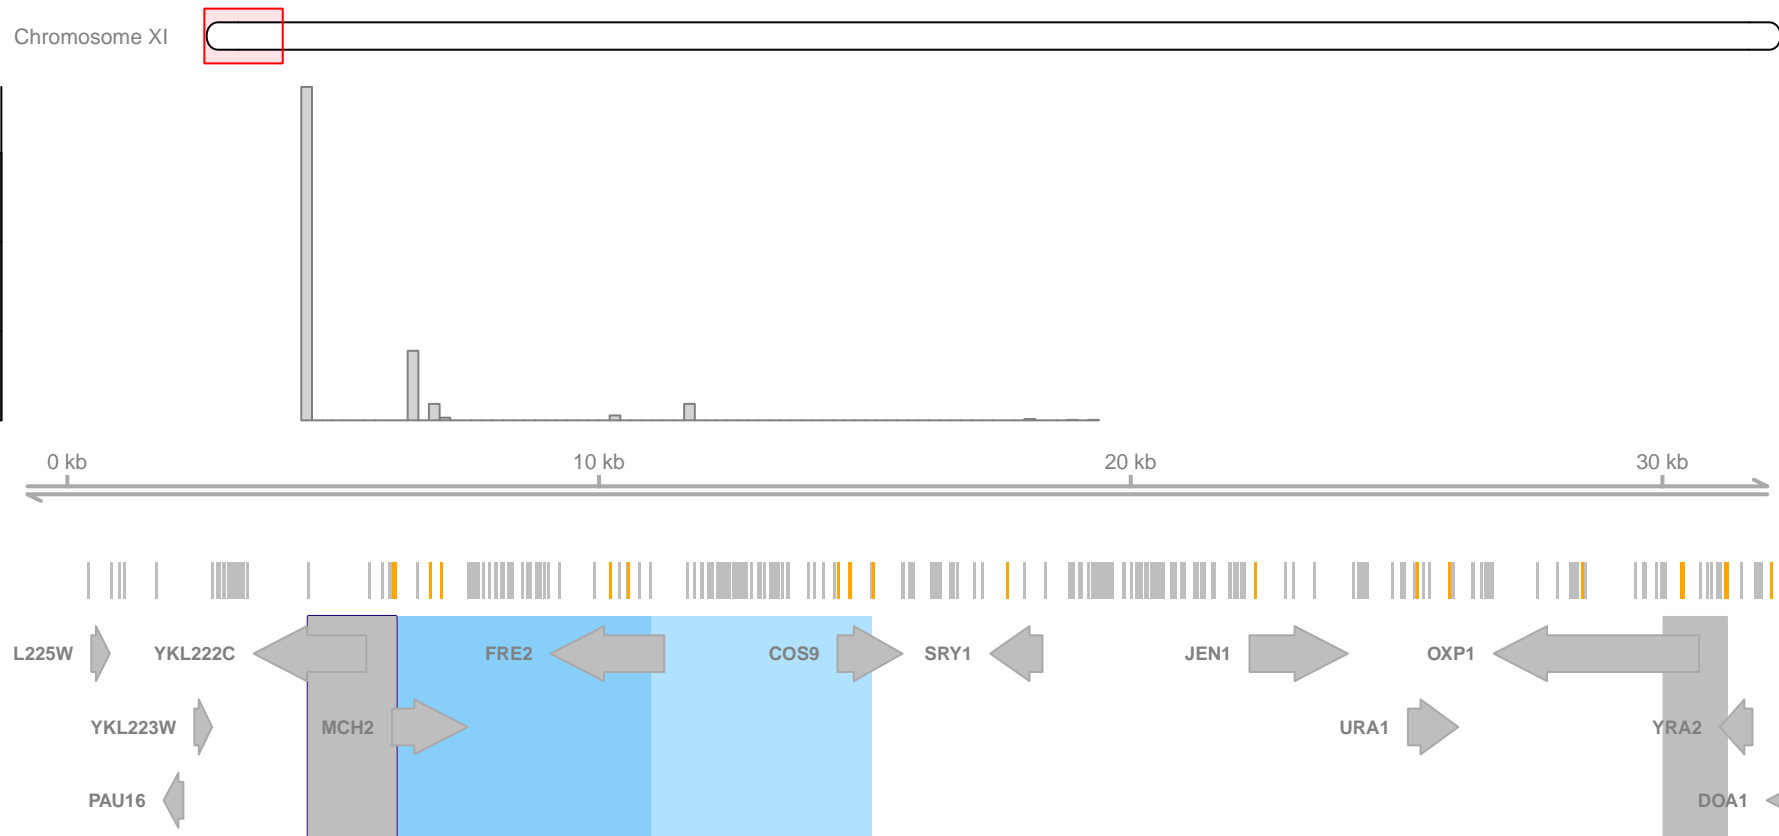

# chrXI:102908\_C/T; 387 genes affected

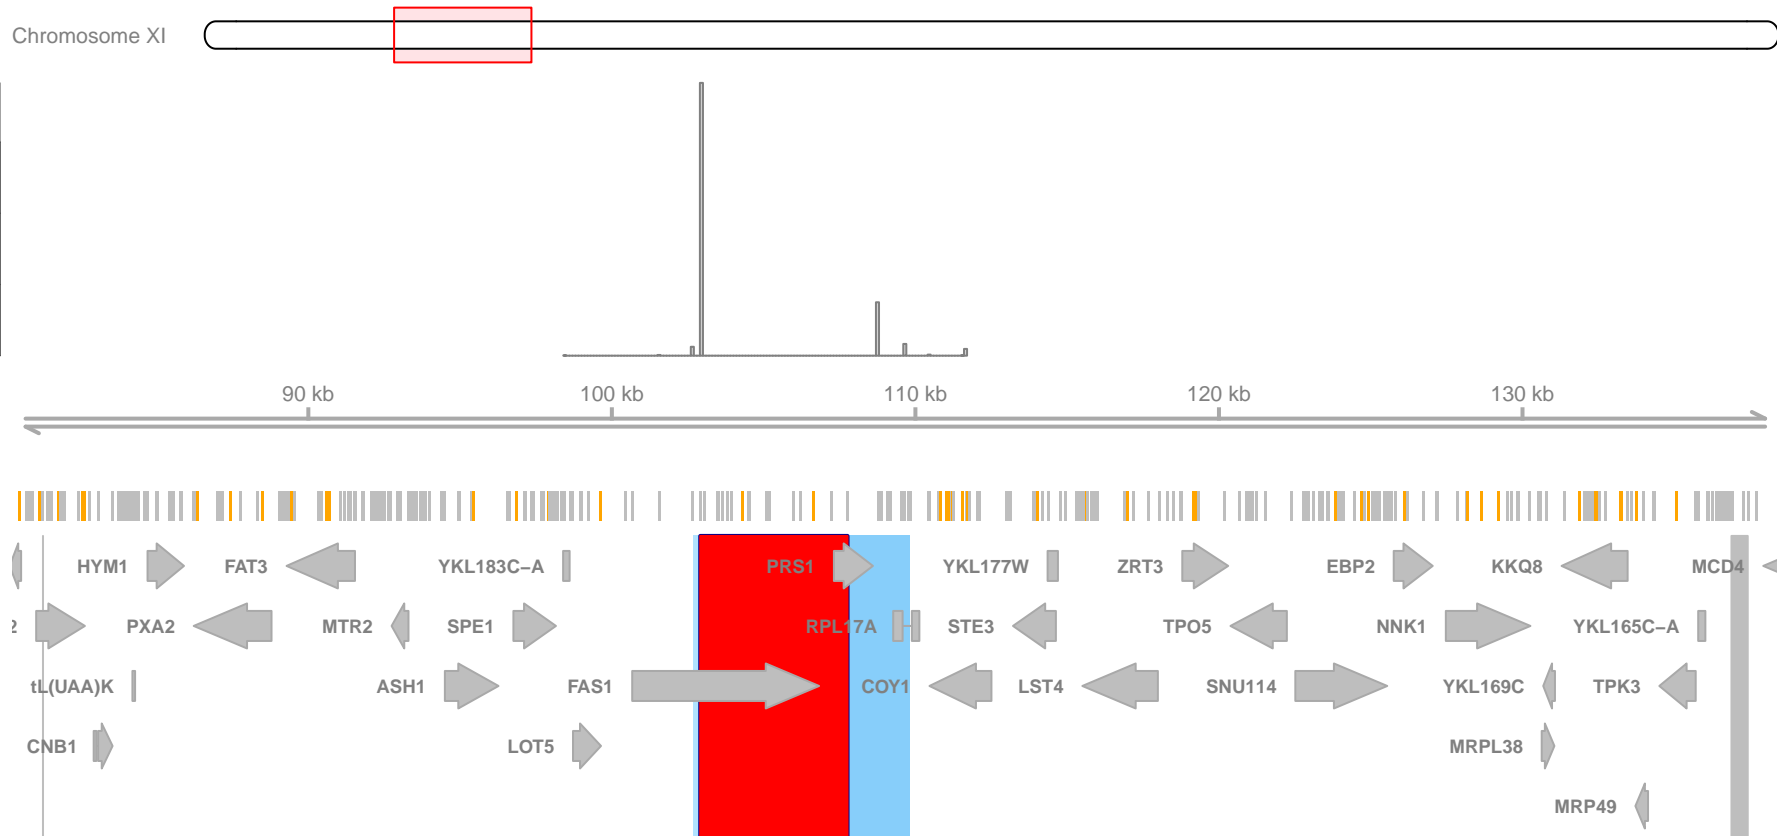

# chrXI:232667\_A/T; 833 genes affected

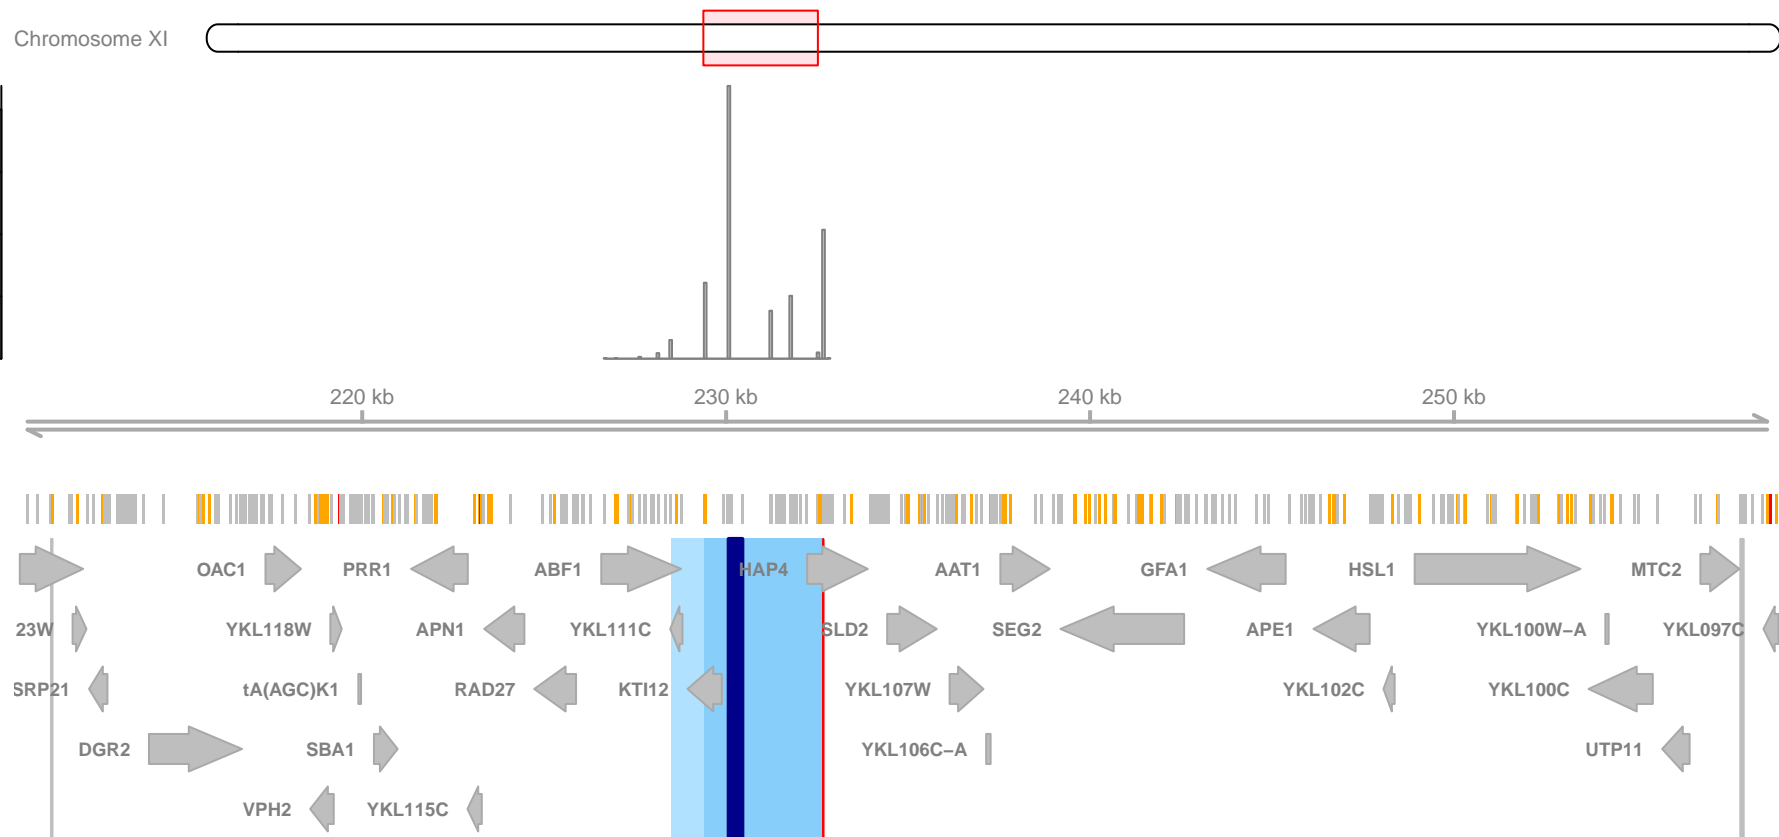

# chrXI:411756\_T/C; 208 genes affected

Chromosome XI

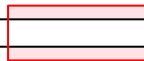

bootstrap frequency

500  
400  
300  
200  
100  
0

400 kb

410 kb

420 kb

430 kb

440 kb

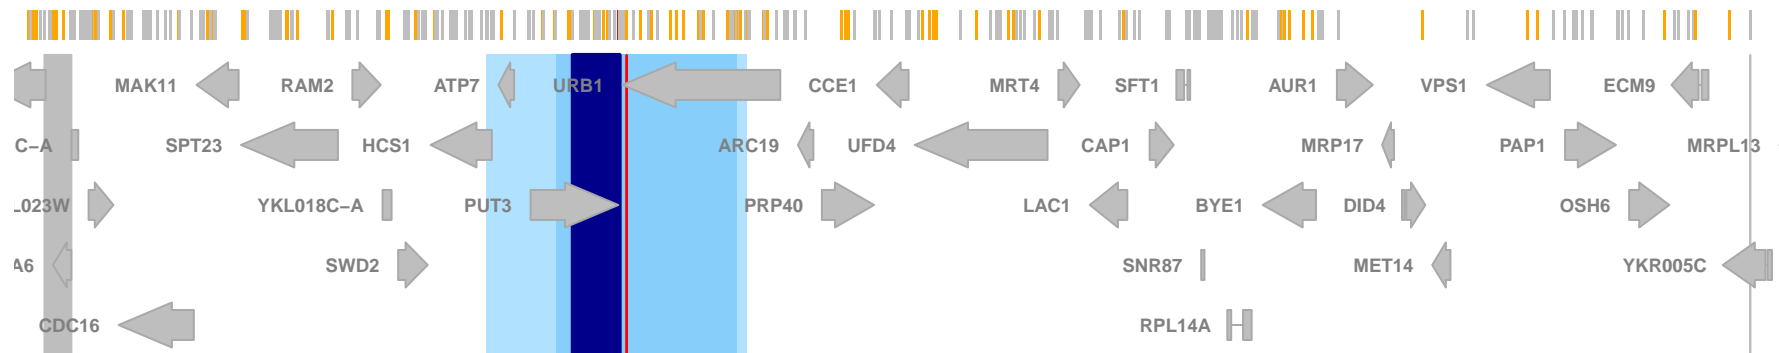



# chrXI:533229\_G/C; 201 genes affected

Chromosome XI

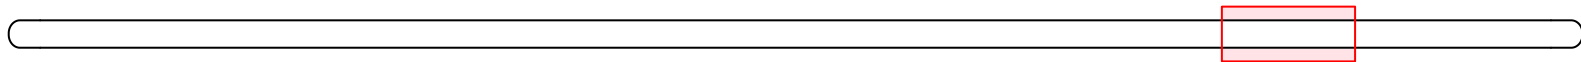

bootstrap frequency

600  
400  
200  
0

520 kb

530 kb

540 kb

550 kb

560 kb

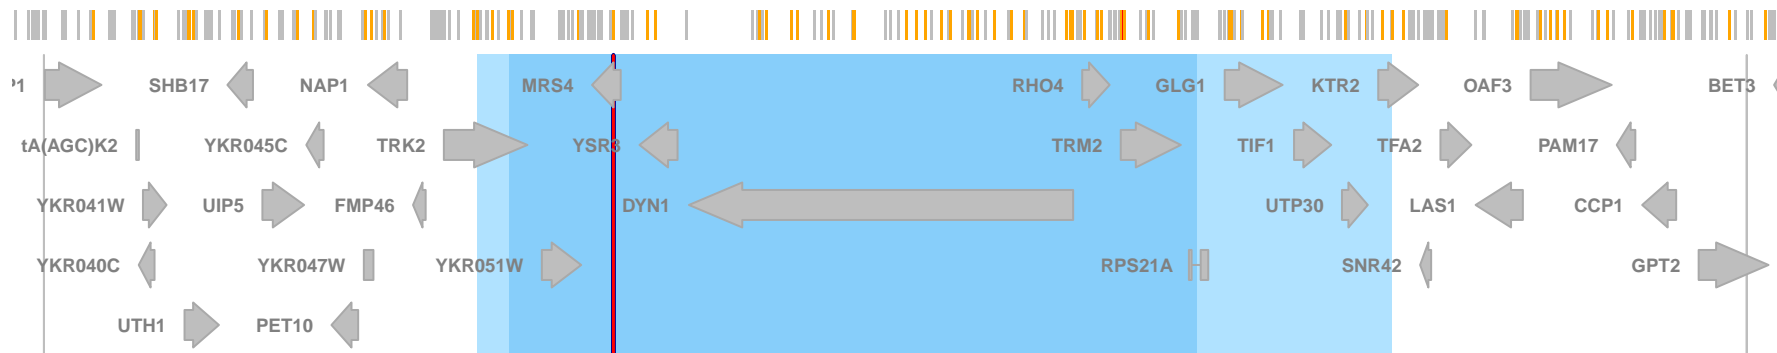

# chrXI:641098\_A/G; 192 genes affected

Chromosome XI

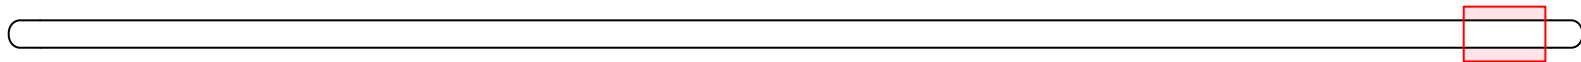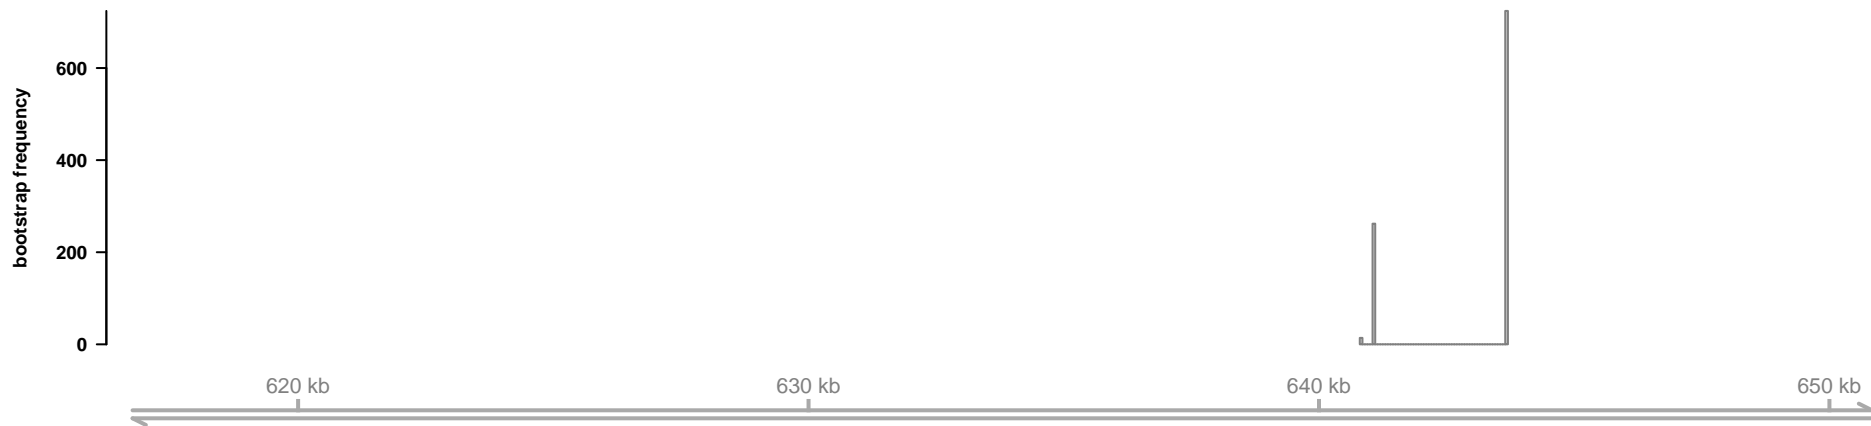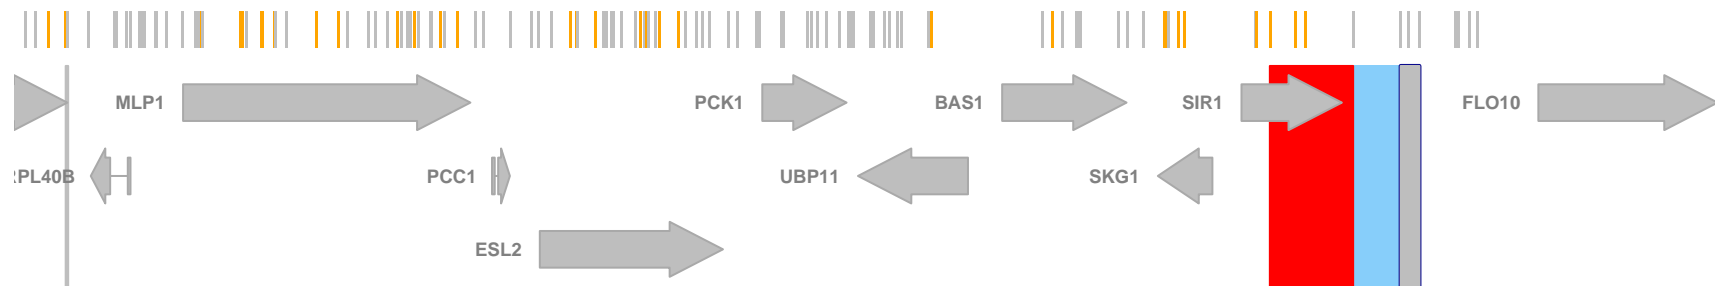

# chrXII:136527\_T/C; 2597 genes affected

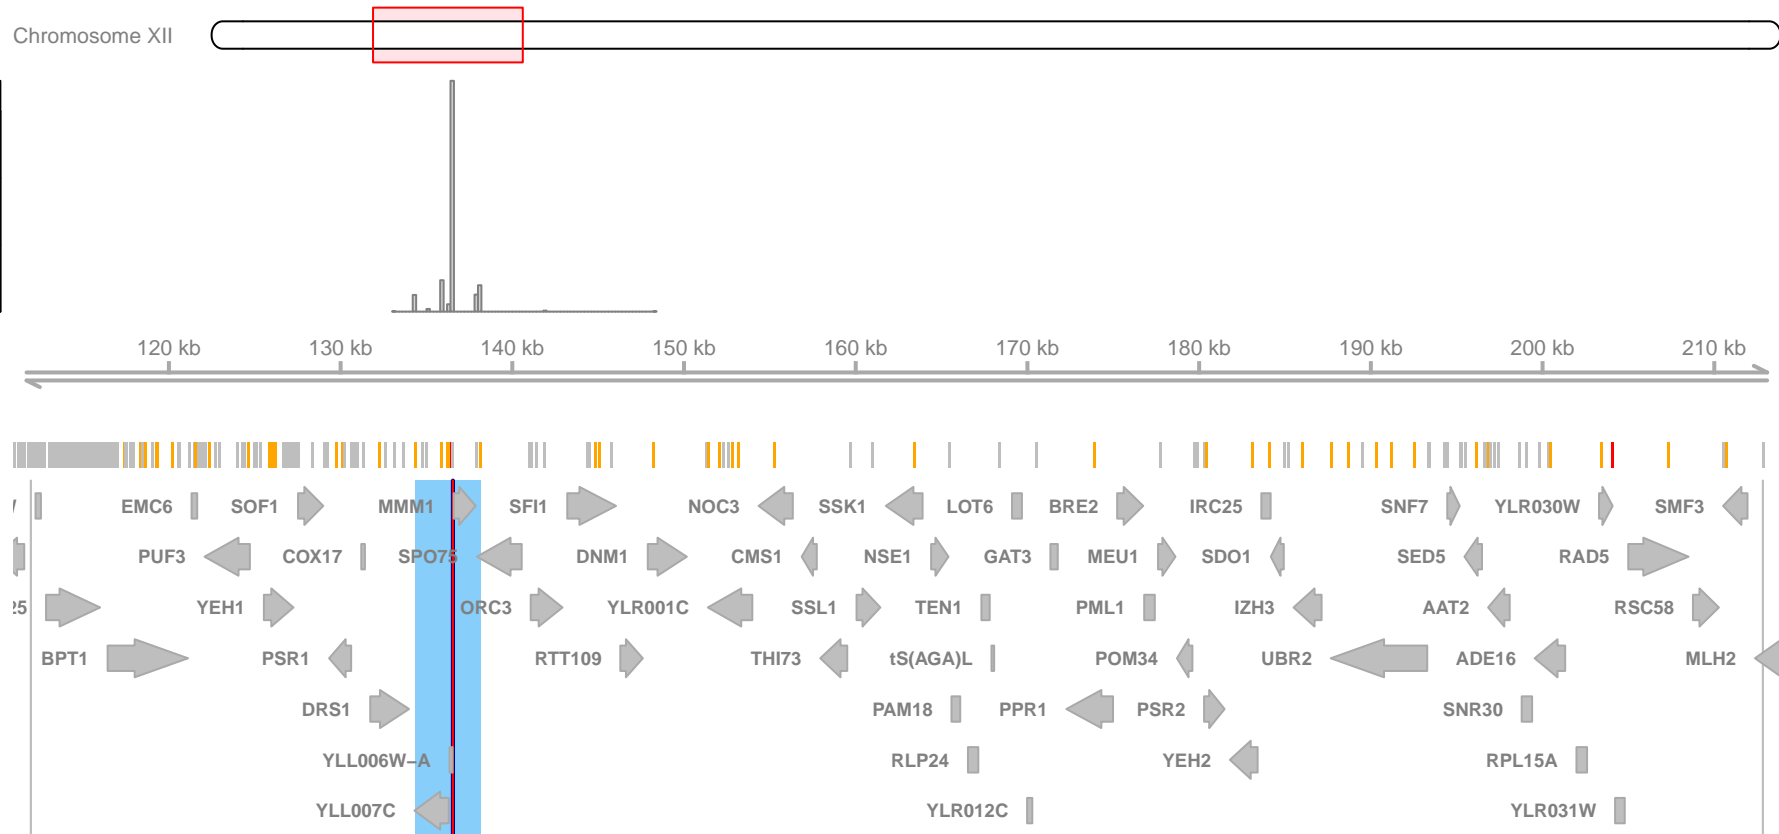

# chrXII:510559\_C/T; 1299 genes affected

Chromosome XII

bootstrapped frequency

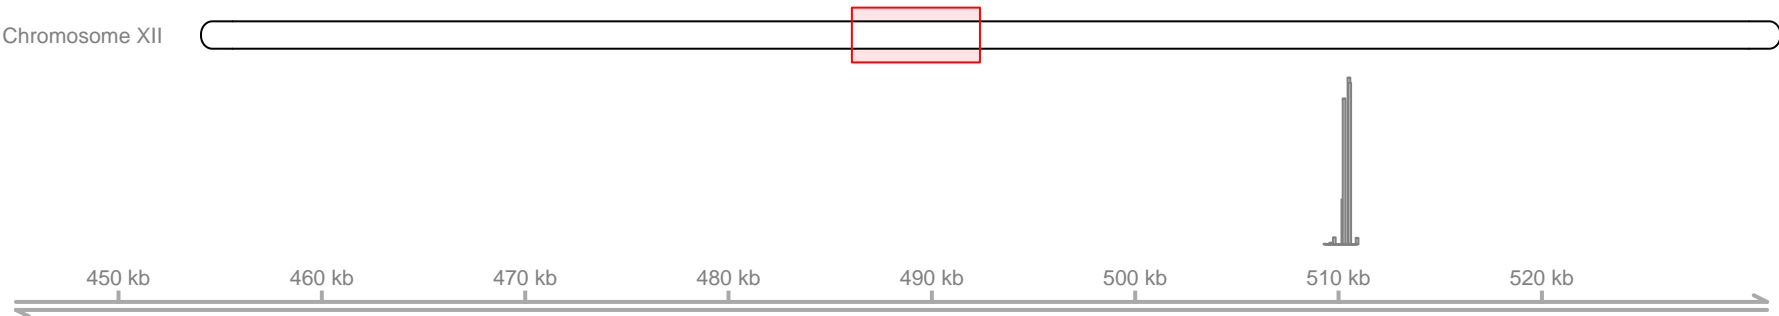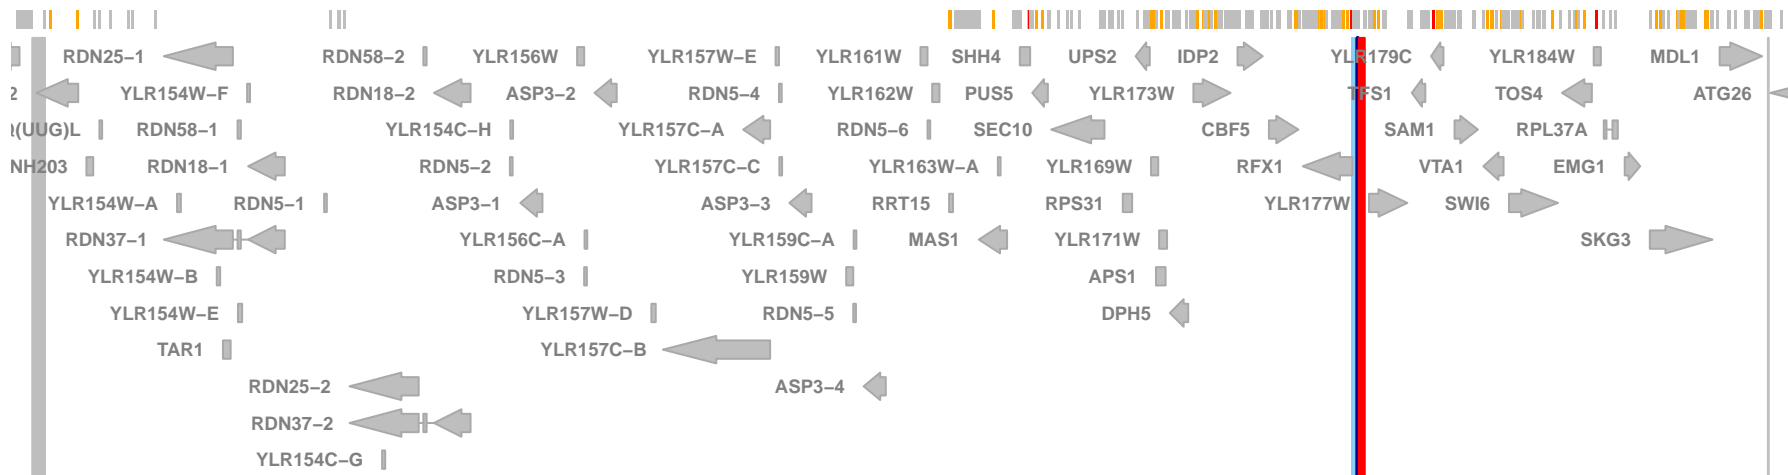

# chrXII:657022\_T/C; 3755 genes affected

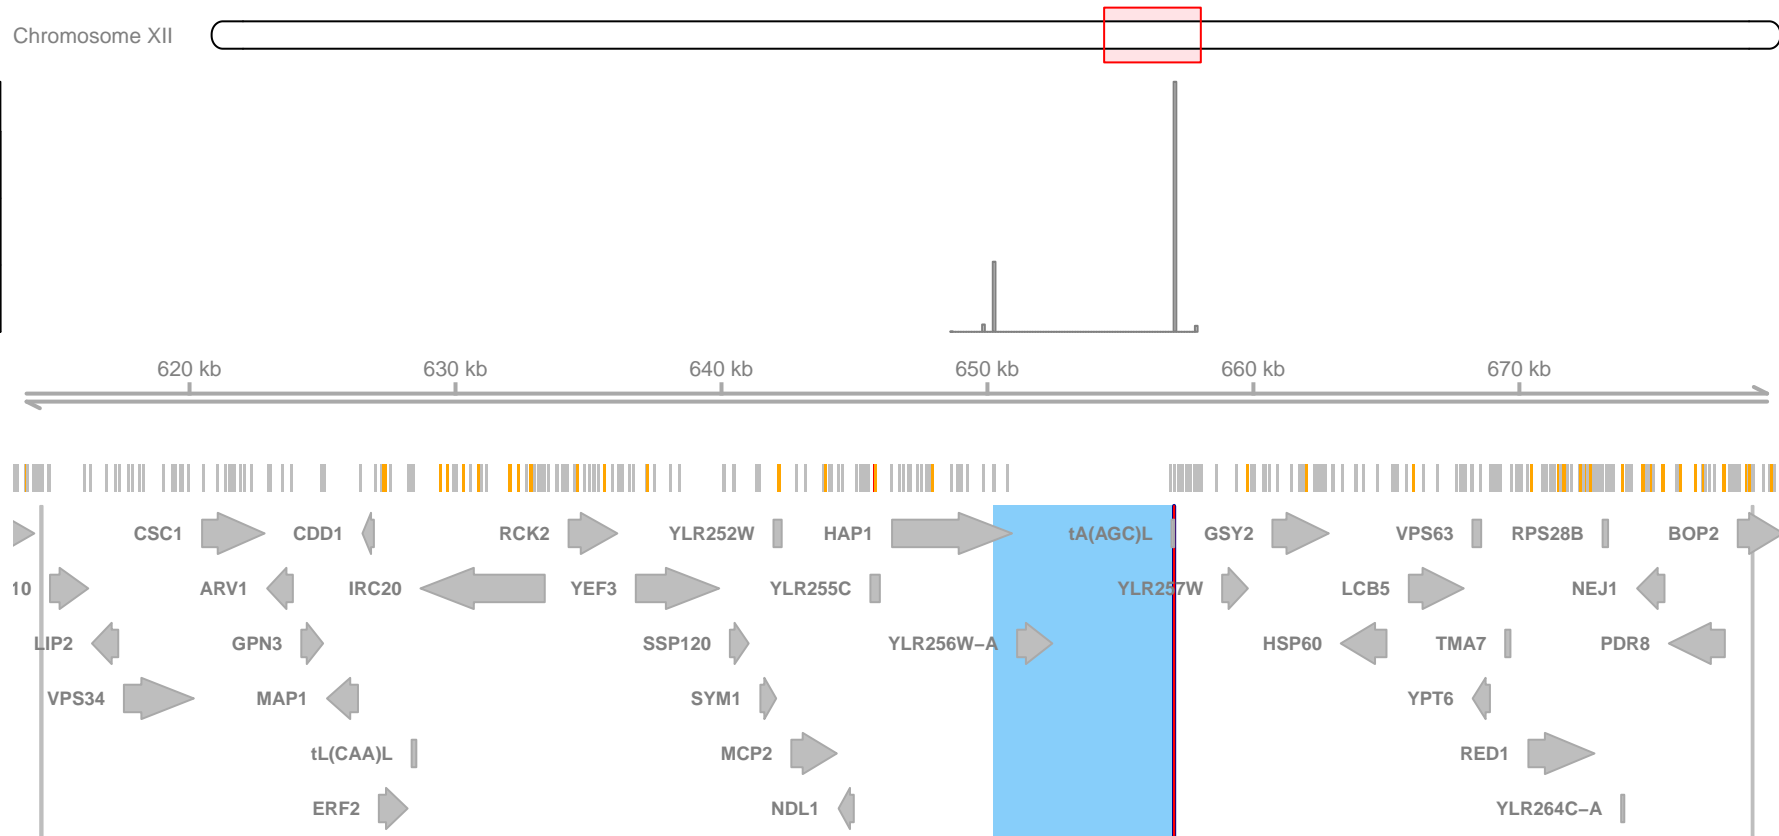

# chrXII:694841\_T/C; 2362 genes affected

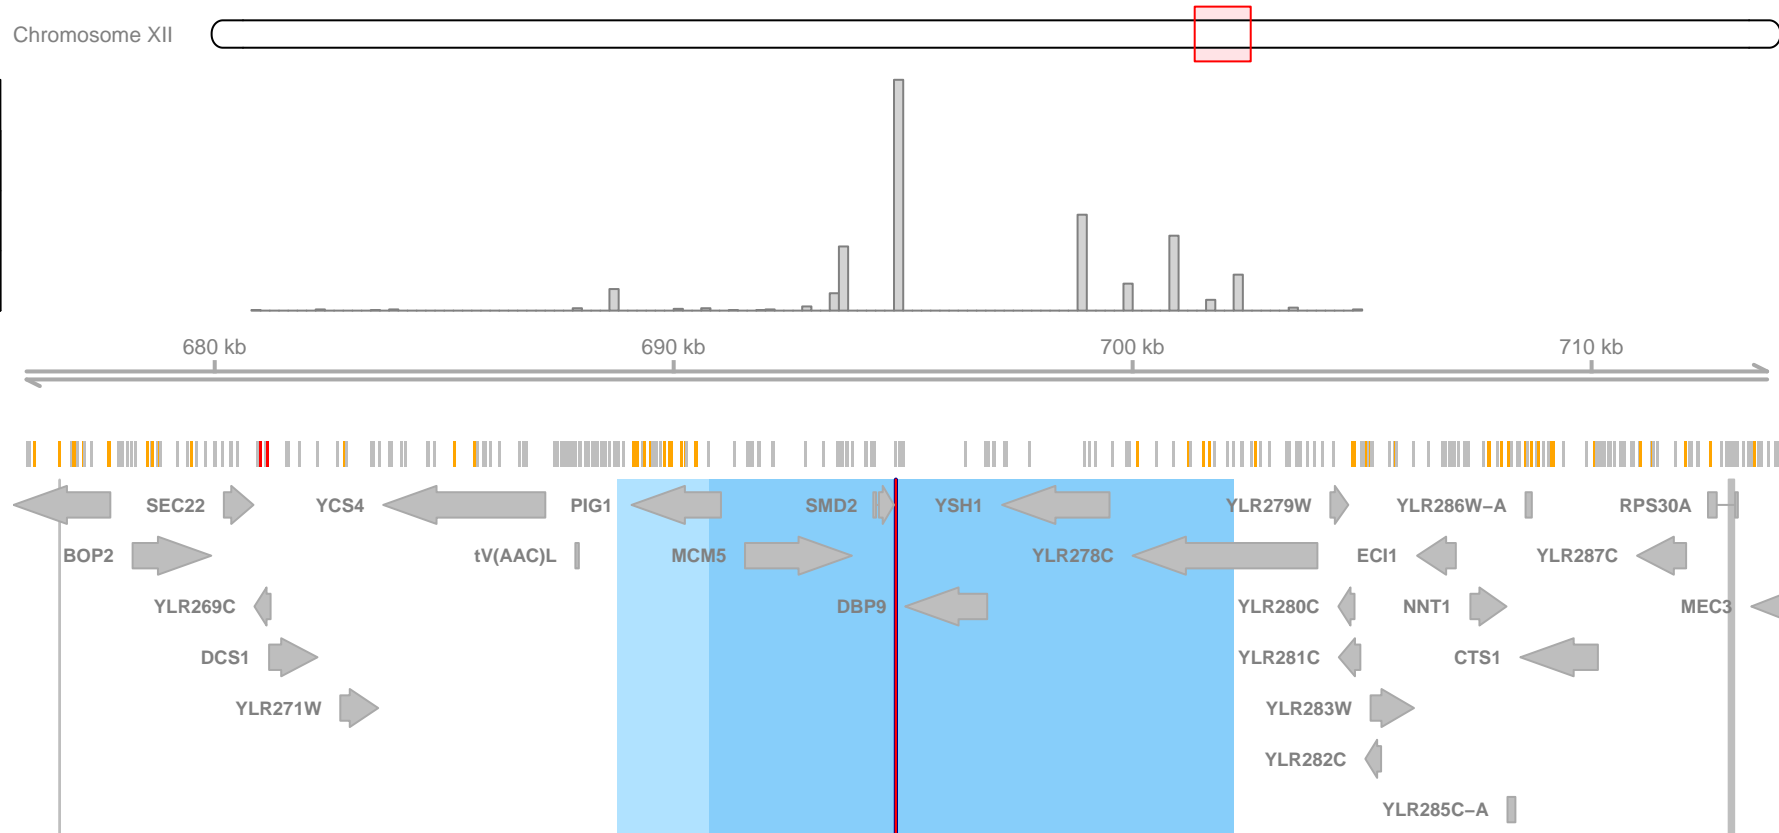

# chrXII:848842\_A/G; 2234 genes affected

Chromosome XII

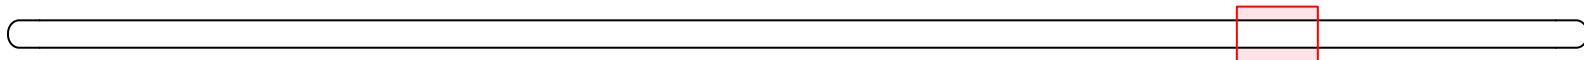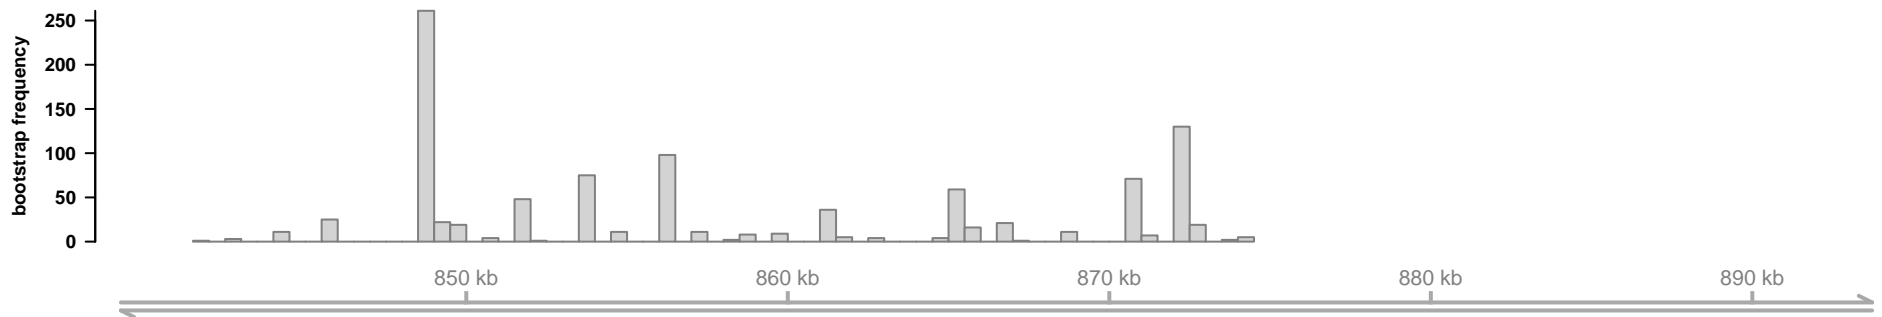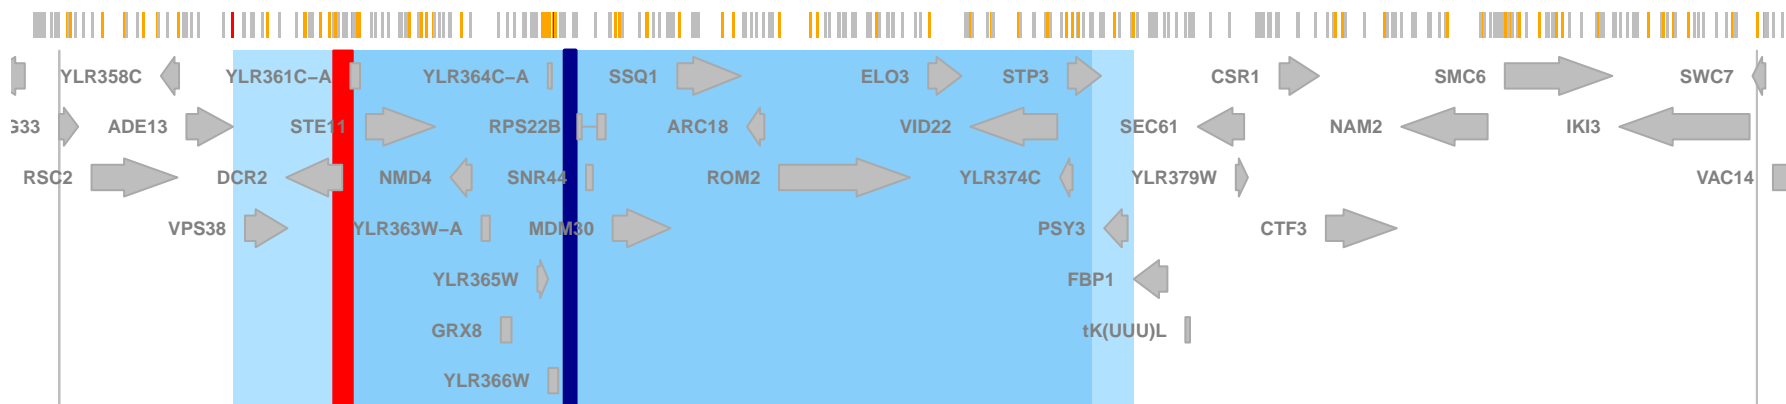

# chrXII:1058607\_C/T; 1086 genes affected

Chromosome XII

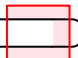

bootstrap frequency

800  
600  
400  
200  
0

1.03 mb

1.04 mb

1.05 mb

1.06 mb

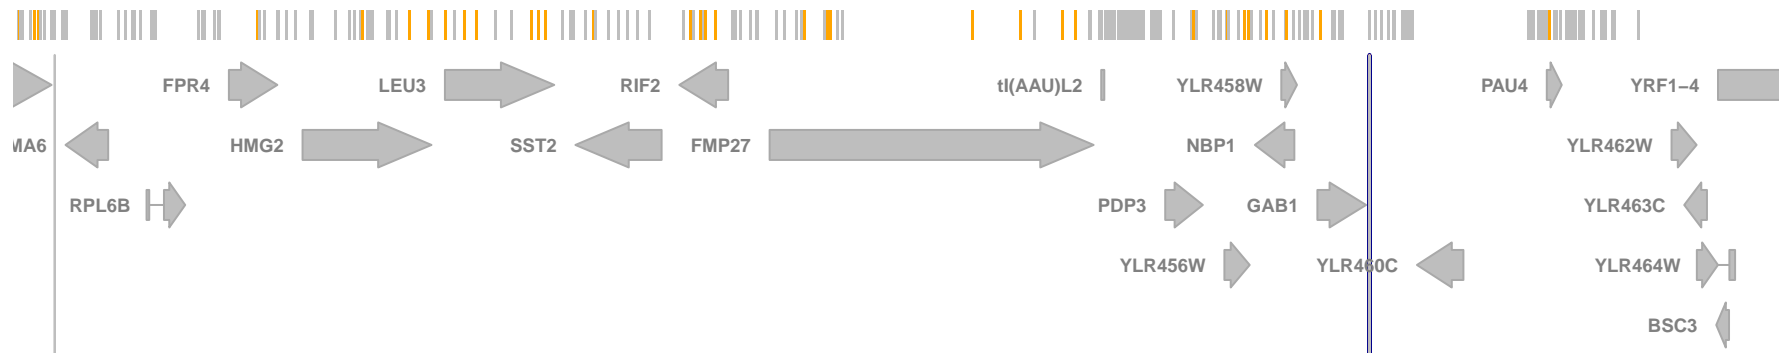



# chrXIII:33836\_G/A; 637 genes affected

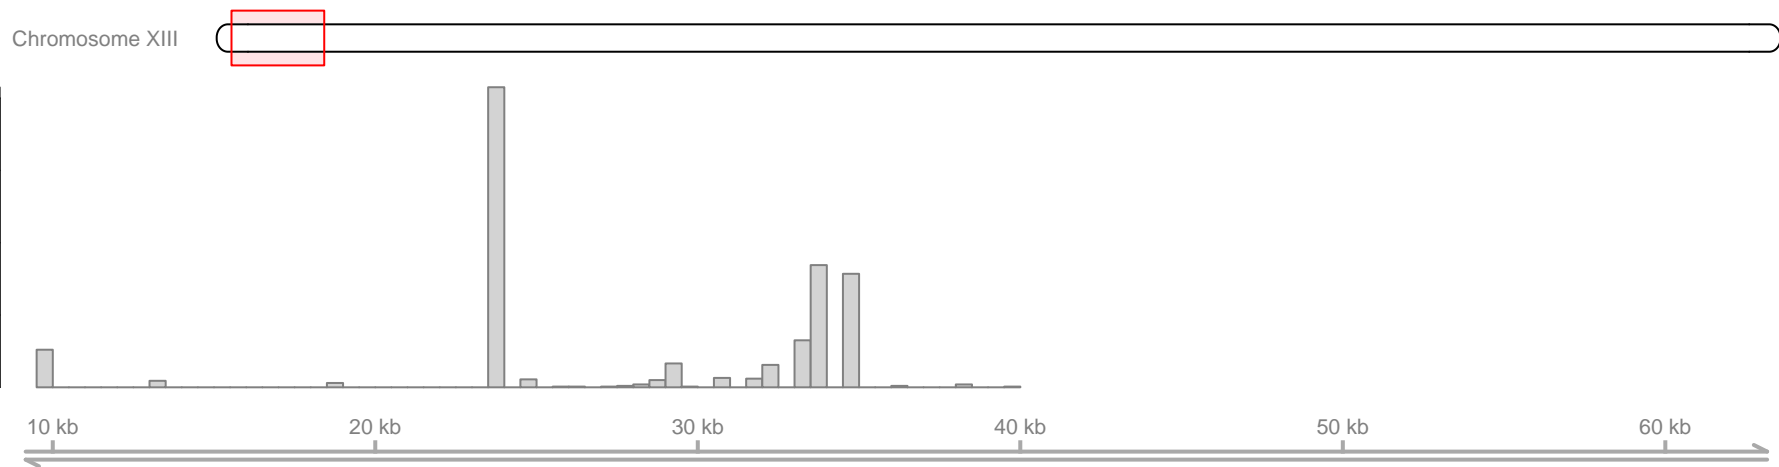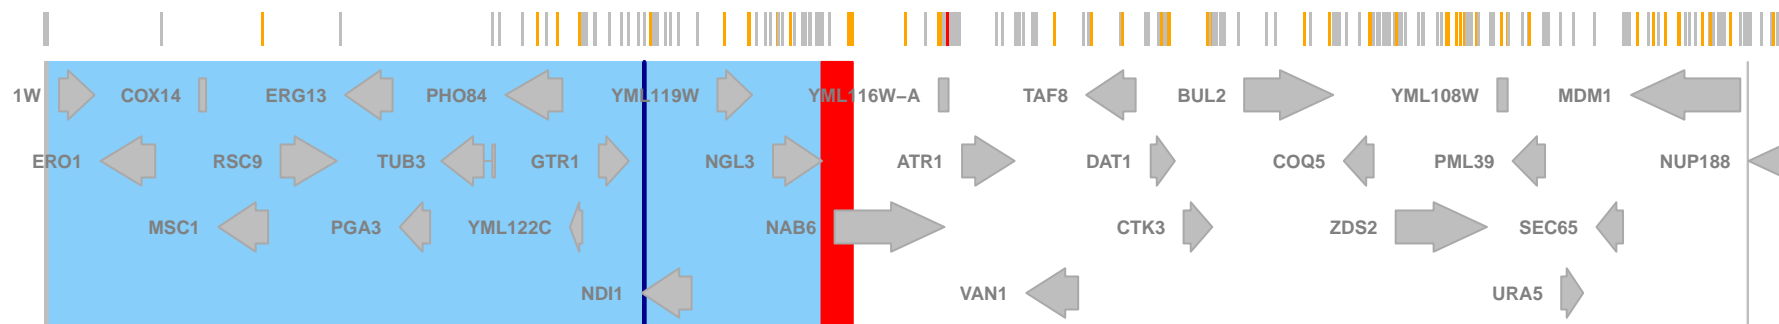

# chrXIII:85889\_GA/G; 801 genes affected

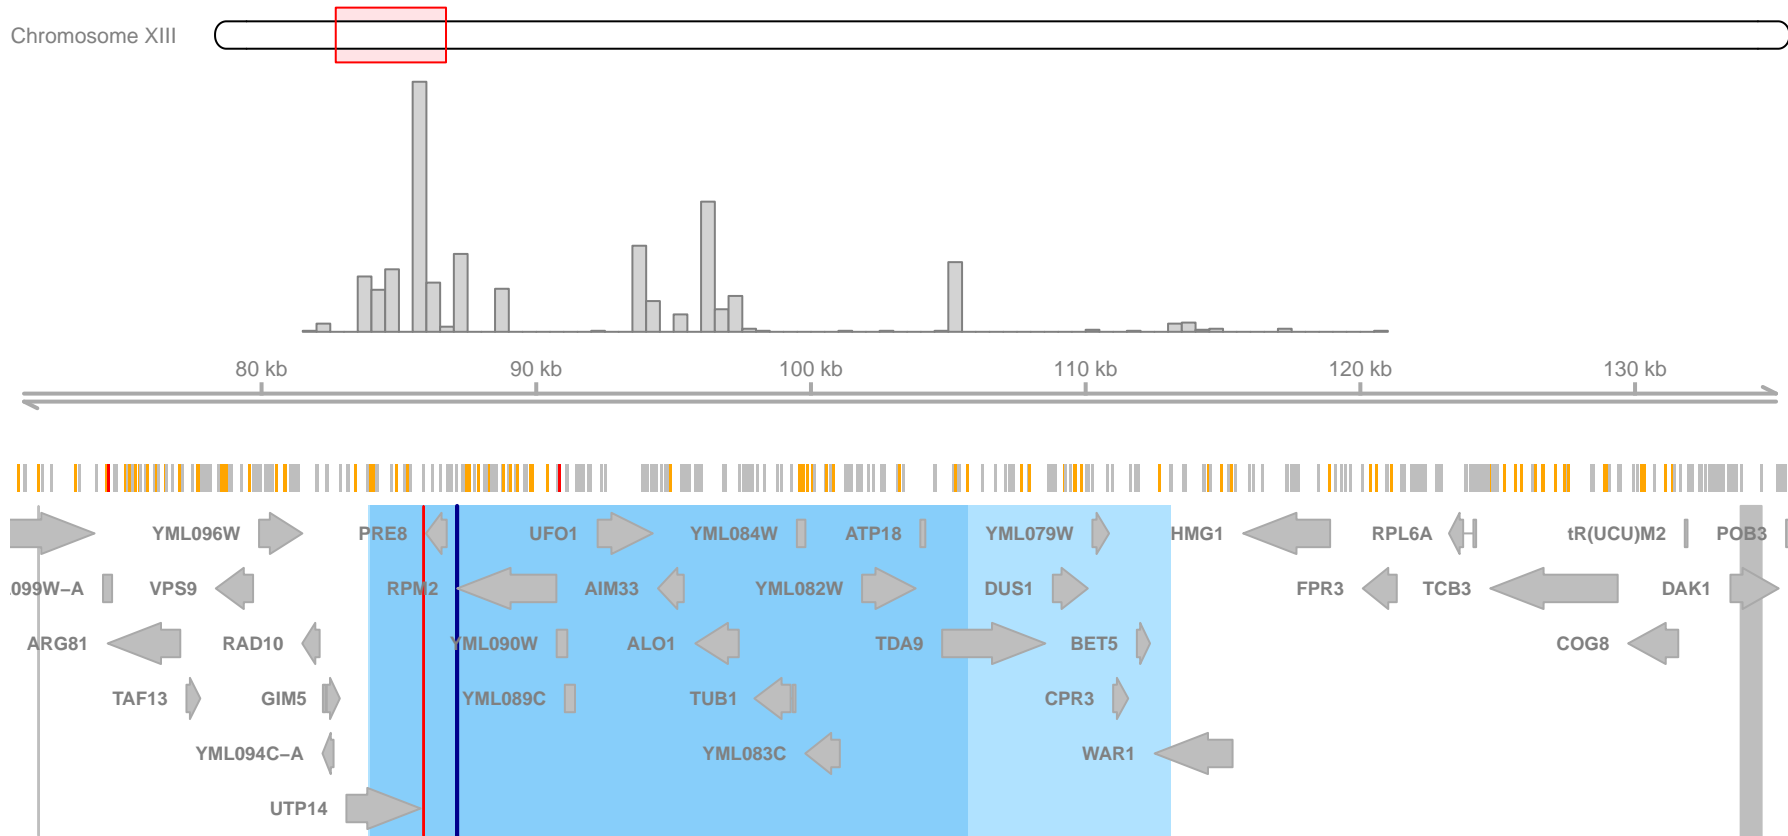

# chrXIII:253667\_T/C; 829 genes affected

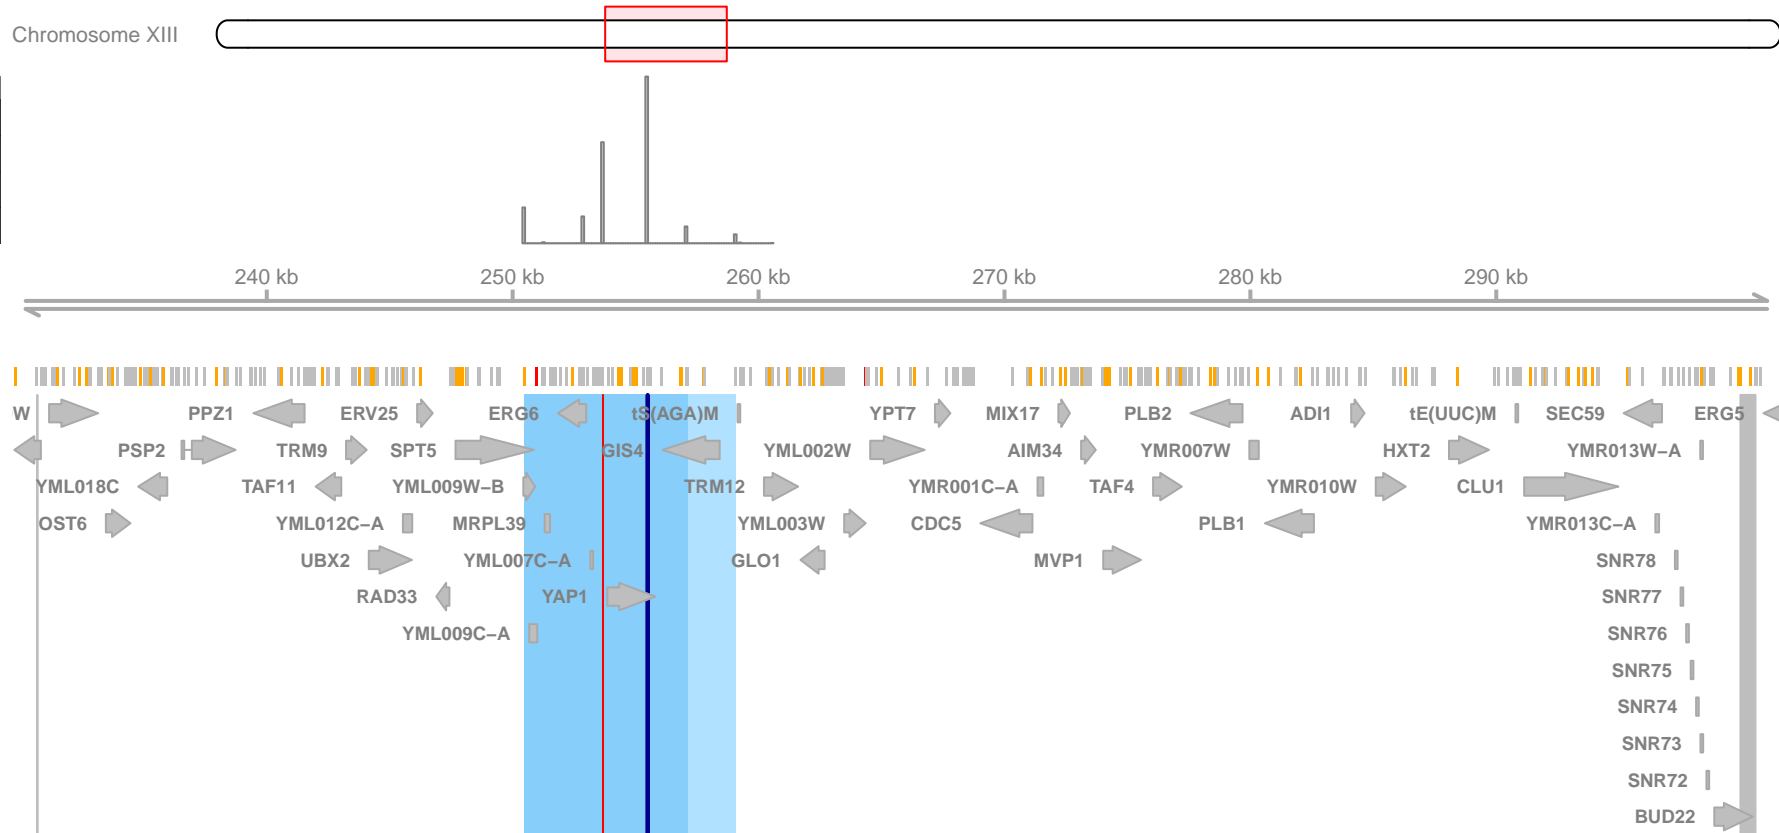

# chrXIII:333449\_G/A; 1324 genes affected

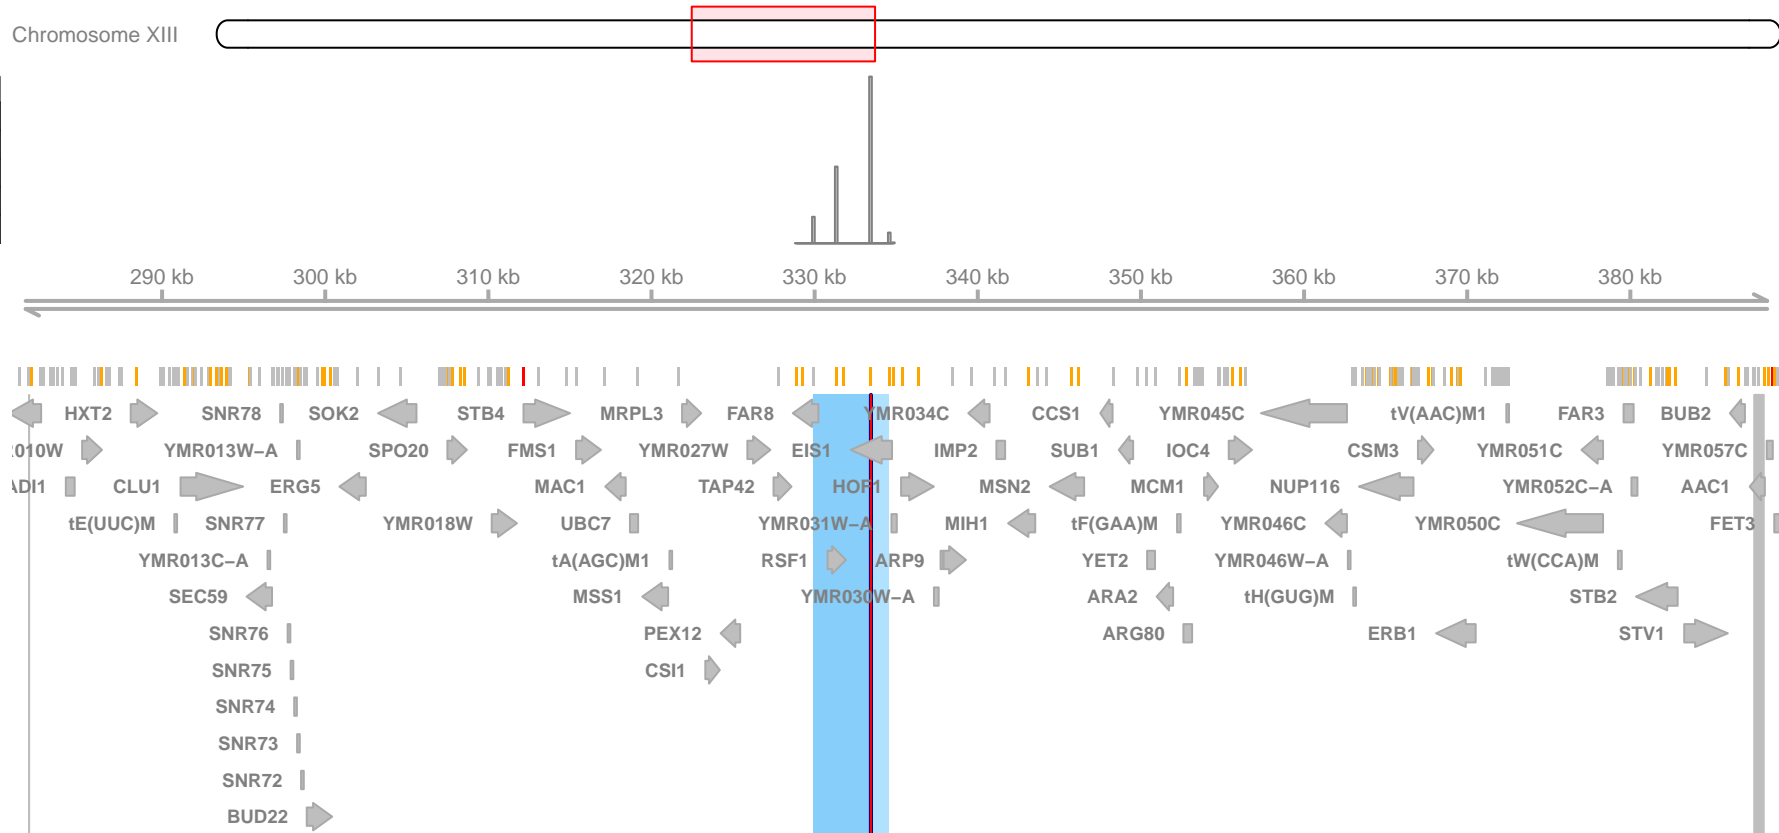

# chrXIII:409778\_G/T; 1293 genes affected

Chromosome XIII

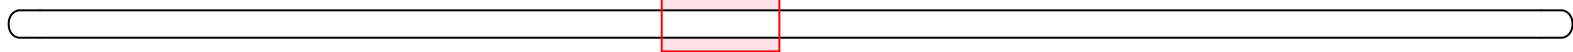

bootstrap frequency

600  
400  
200  
0

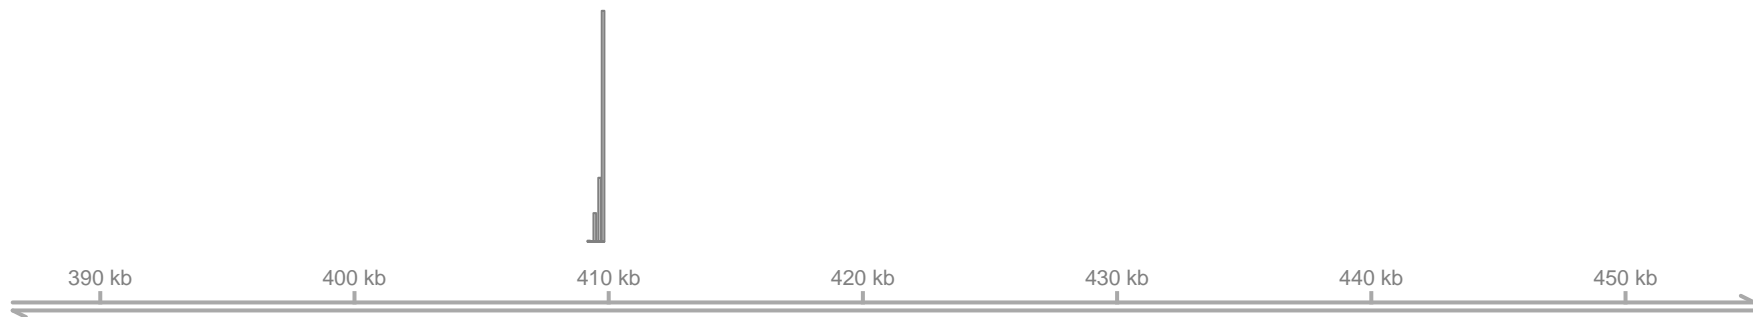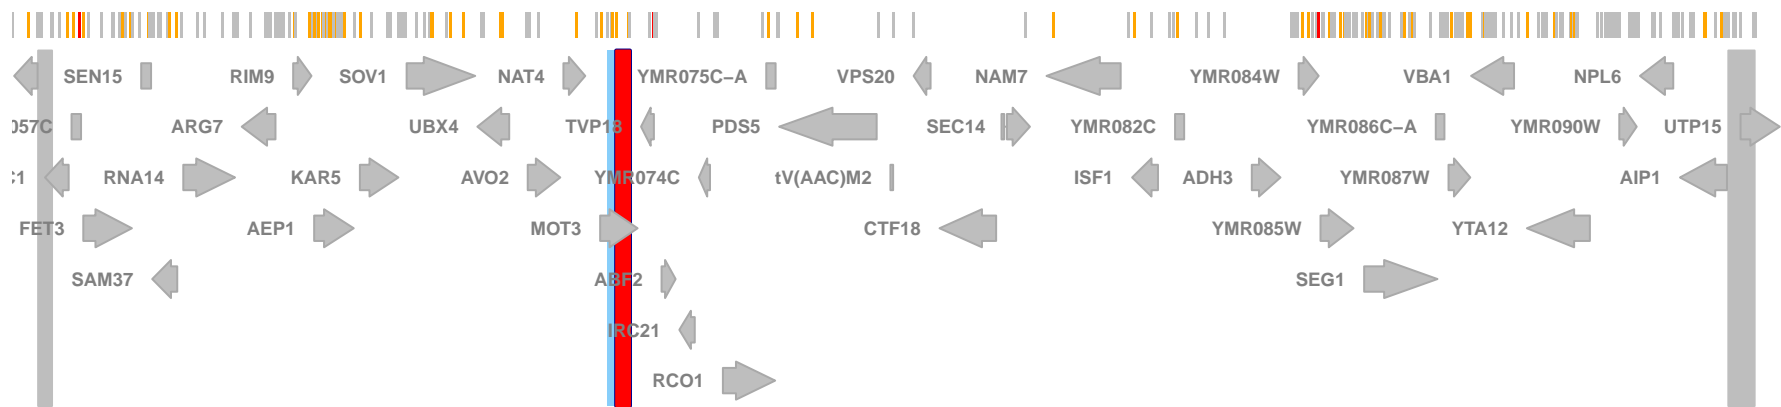

# chrXIII:591723\_A/G; 710 genes affected

Chromosome XIII

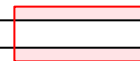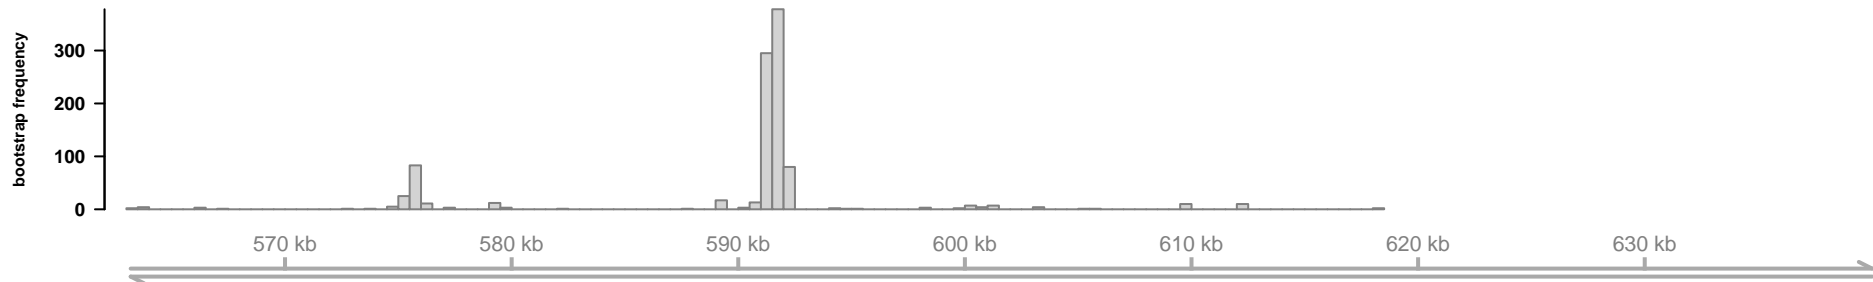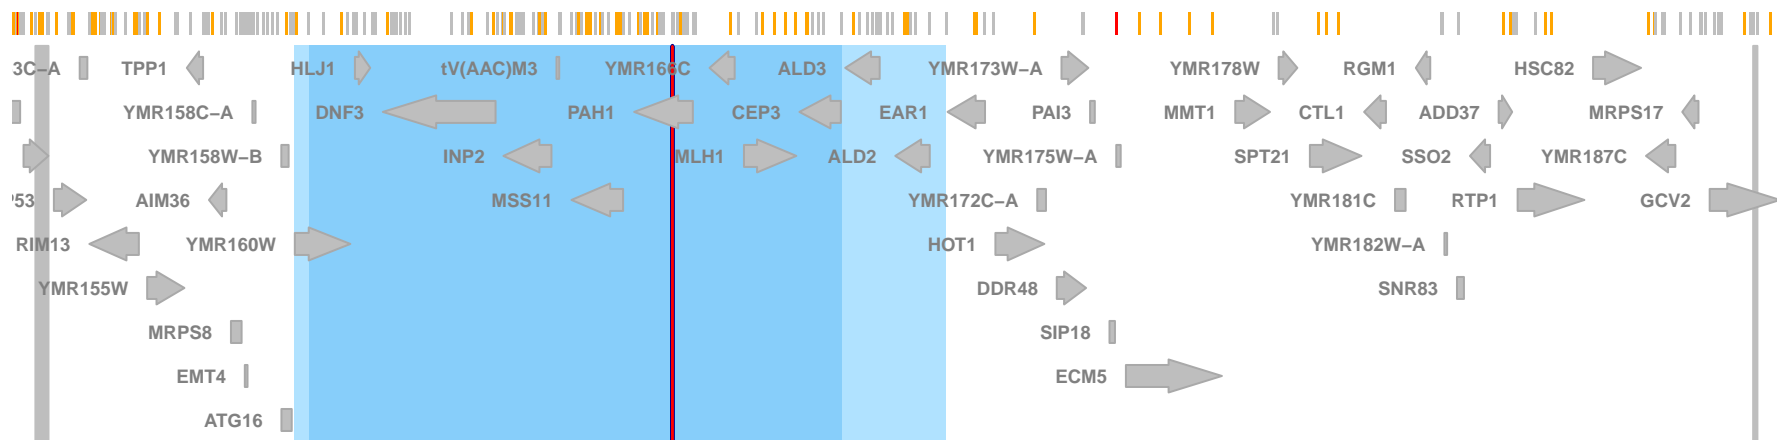

# chrXIII:761318\_T/A; 616 genes affected

Chromosome XIII

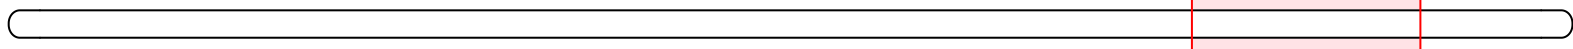

bootstrap frequency

600  
400  
200  
0

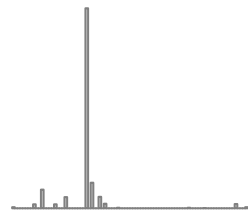

710 kb 720 kb 730 kb 740 kb 750 kb 760 kb 770 kb 780 kb 790 kb 800 kb 810 kb 820 kb 830 kb

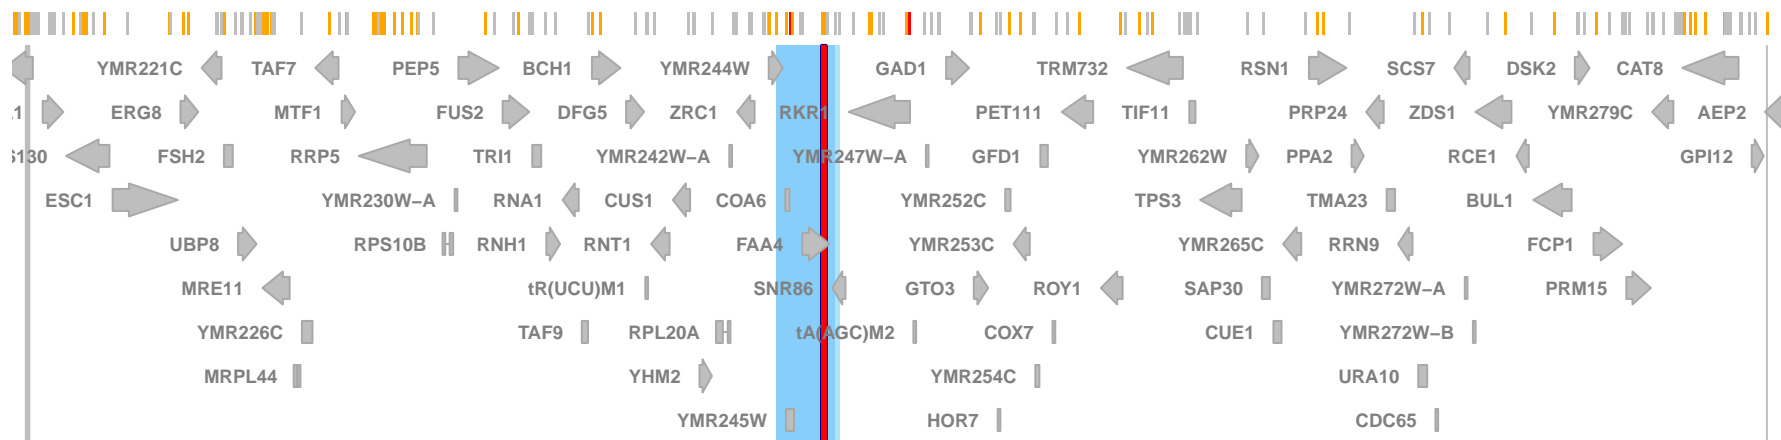

# chrXIII:914575\_T/C; 615 genes affected

Chromosome XIII

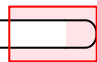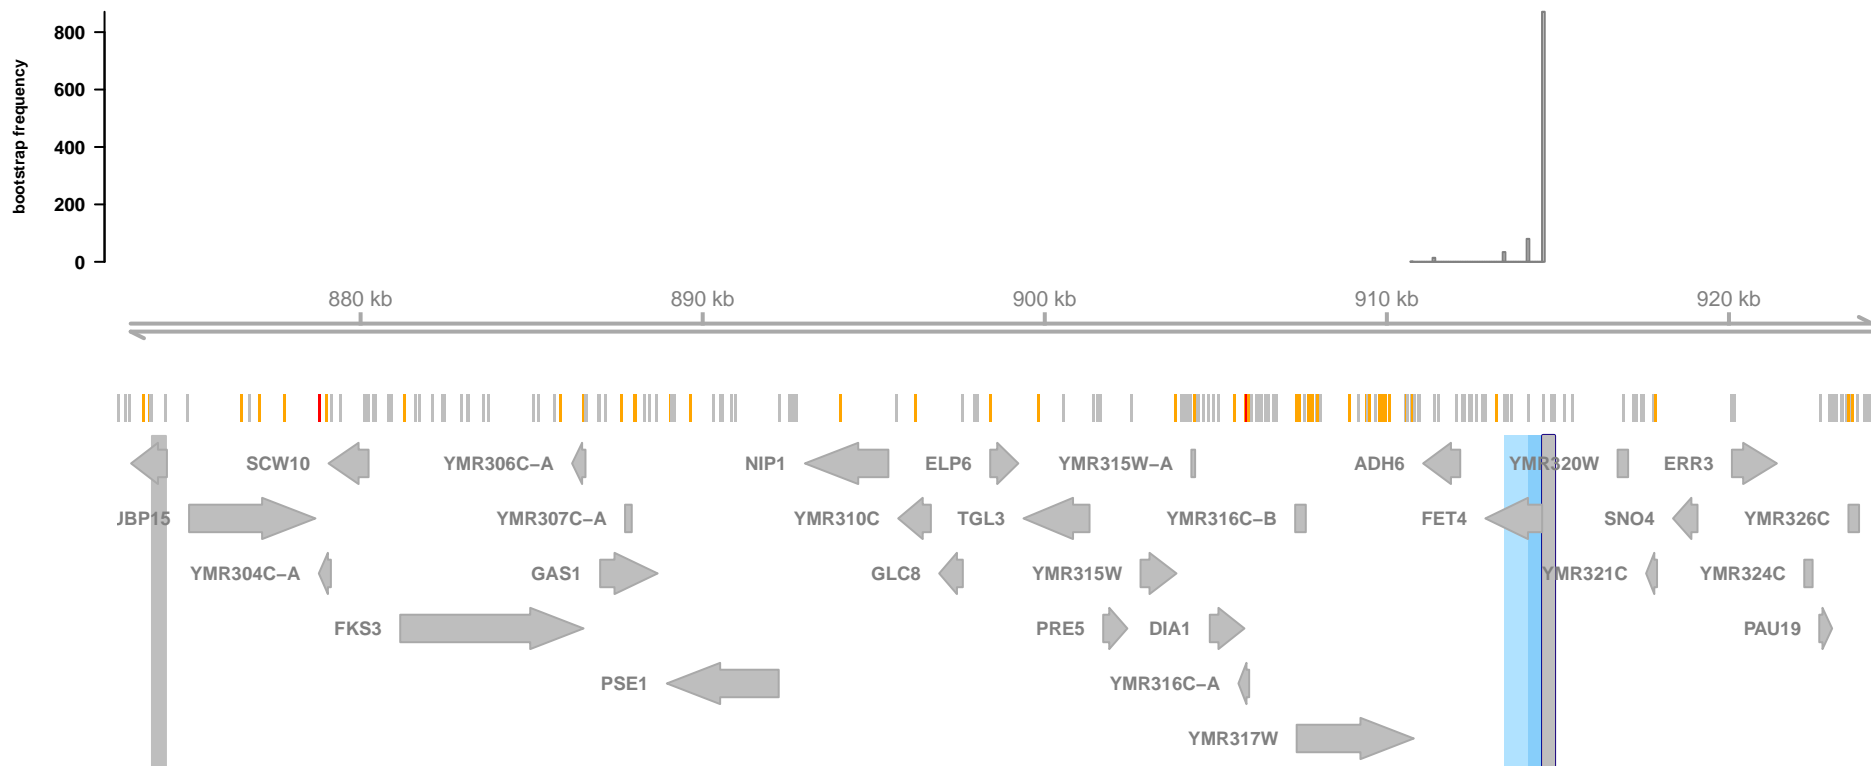



# chrXIV:24003\_C/CCCTTTTTTA; 1115 genes affected

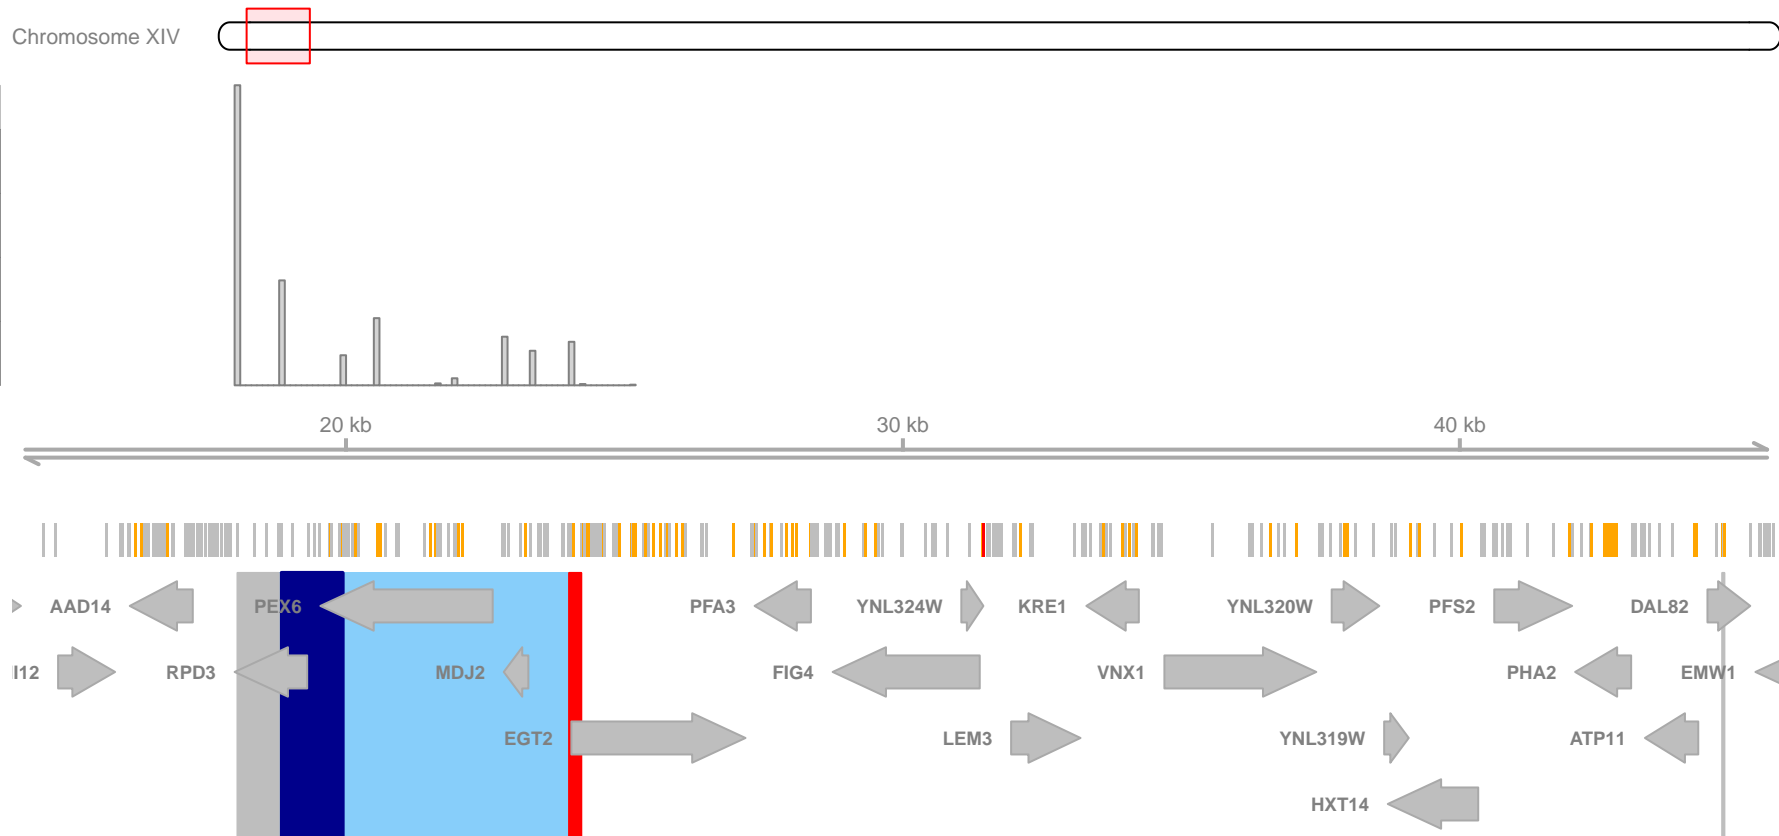

# chrXIV:267161\_G/A; 3166 genes affected

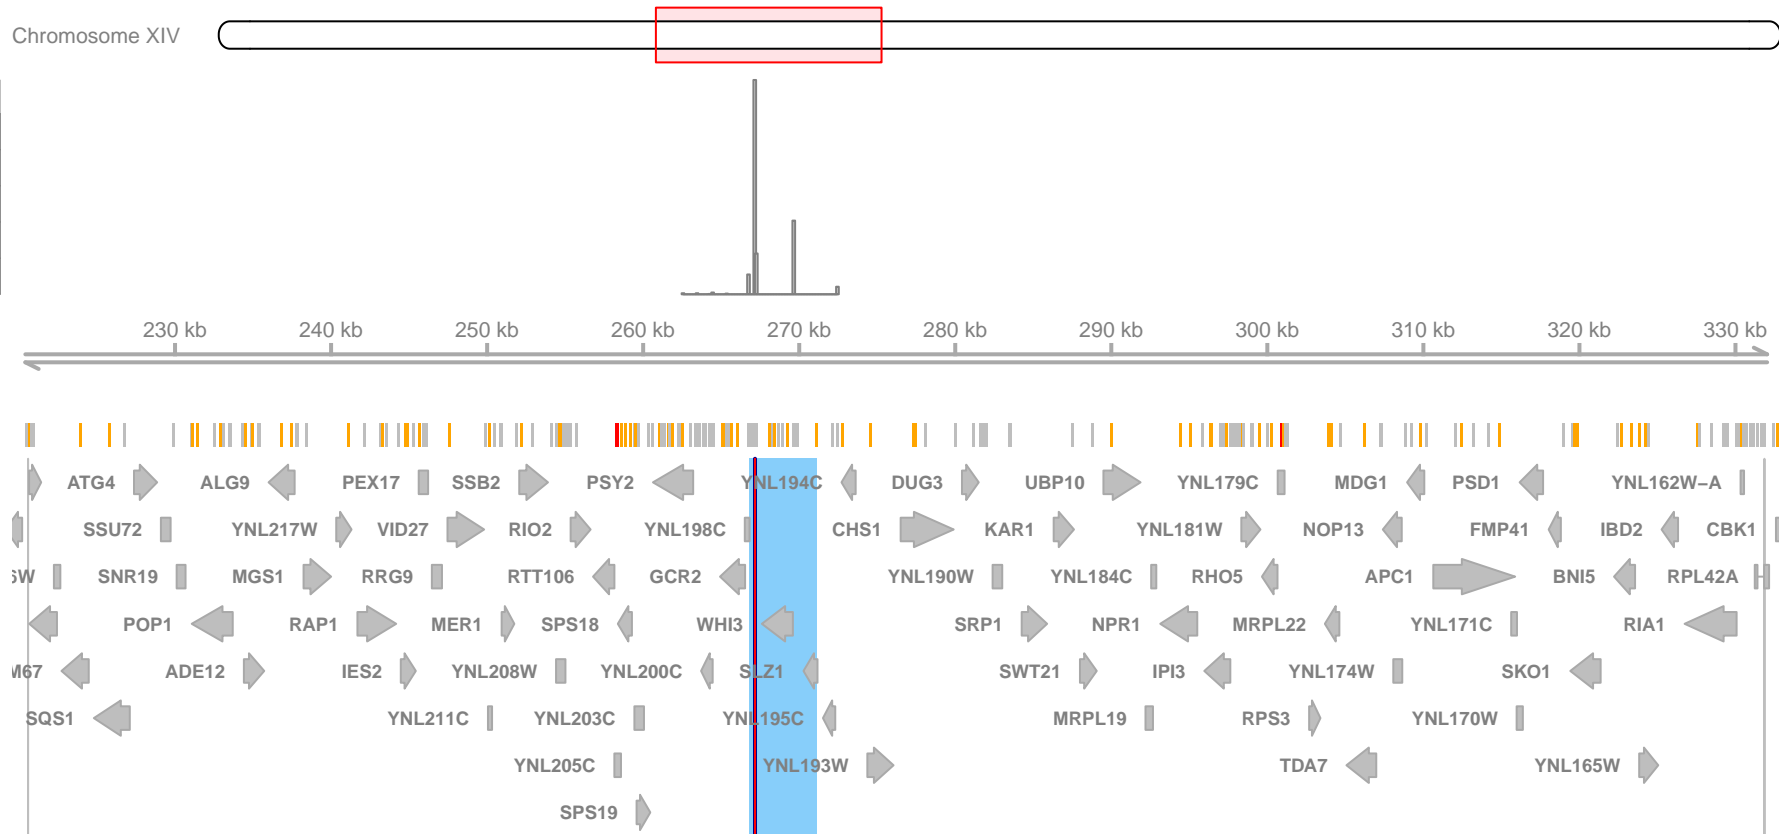

# chrXIV:372376\_G/A; 4137 genes affected

Chromosome XIV

bootstrap frequency

250  
200  
150  
100  
50  
0

330 kb

340 kb

350 kb

360 kb

370 kb

380 kb

390 kb

400 kb

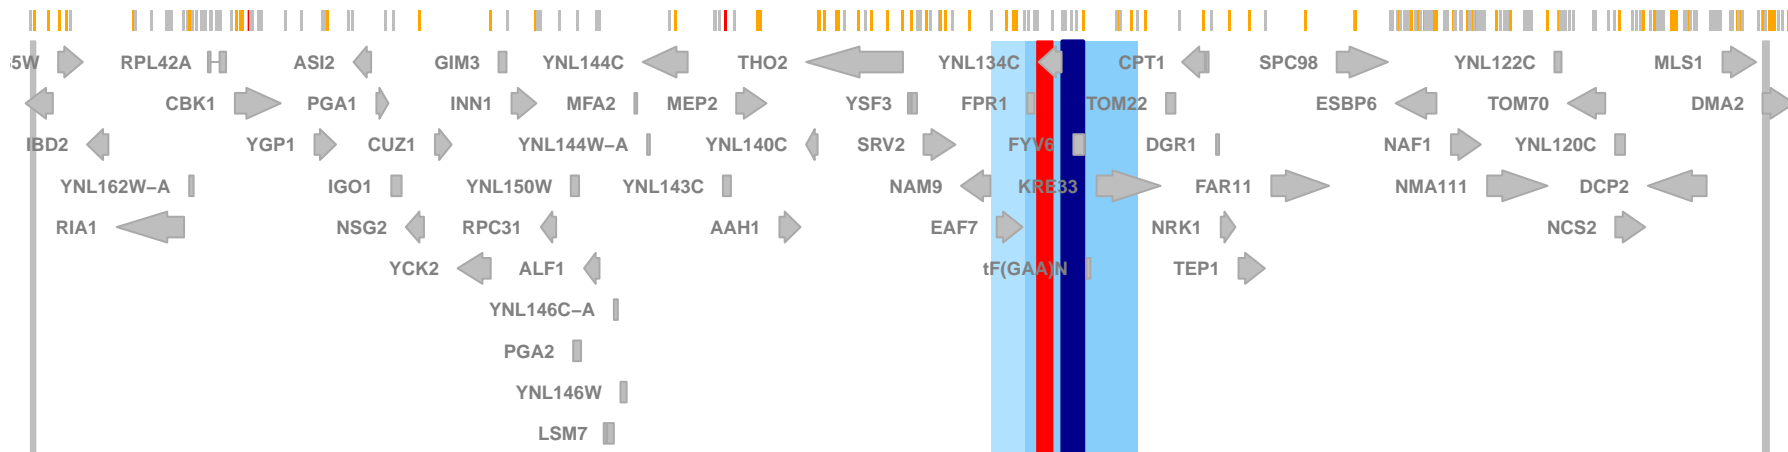

# chrXIV:466588\_T/G; 4550 genes affected

Chromosome XIV

bootstrap frequency

800  
600  
400  
200  
0

420 kb 430 kb 440 kb 450 kb 460 kb 470 kb 480 kb 490 kb 500 kb 510 kb 520 kb

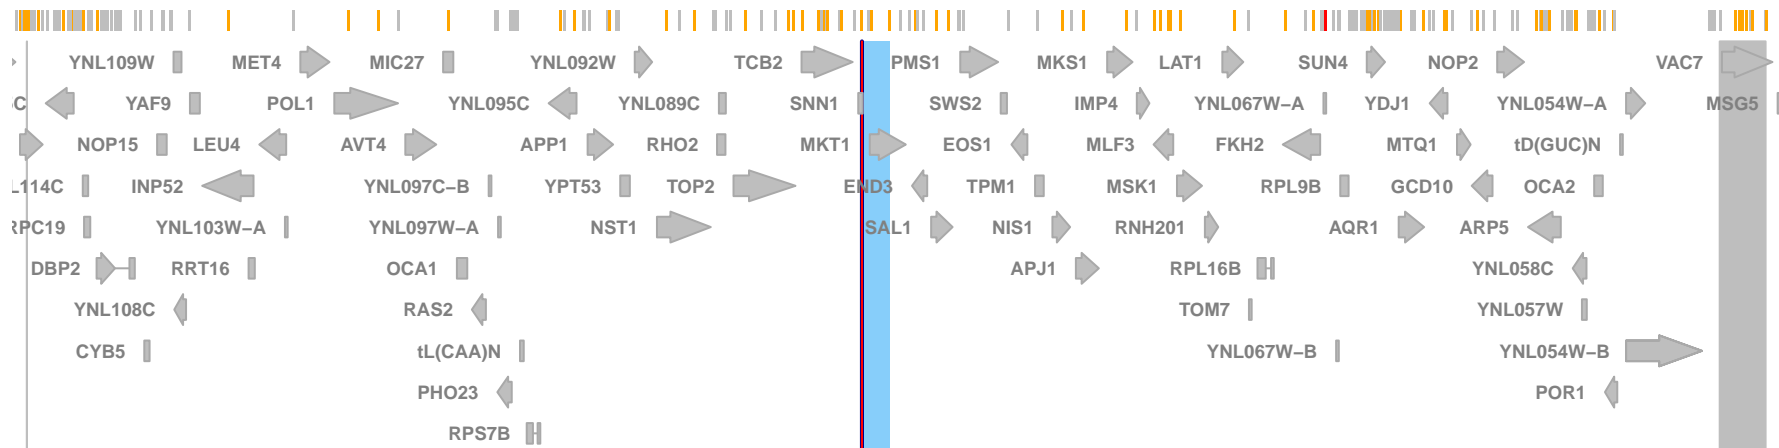

# chrXIV:579945\_GTTA/G; 1967 genes affected

Chromosome XIV

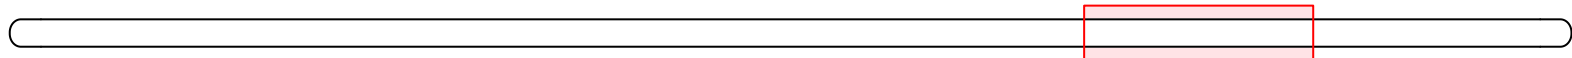

bootstrap frequency

500  
400  
300  
200  
100  
0

550 kb 560 kb 570 kb 580 kb 590 kb 600 kb 610 kb 620 kb 630 kb 640 kb 650 kb

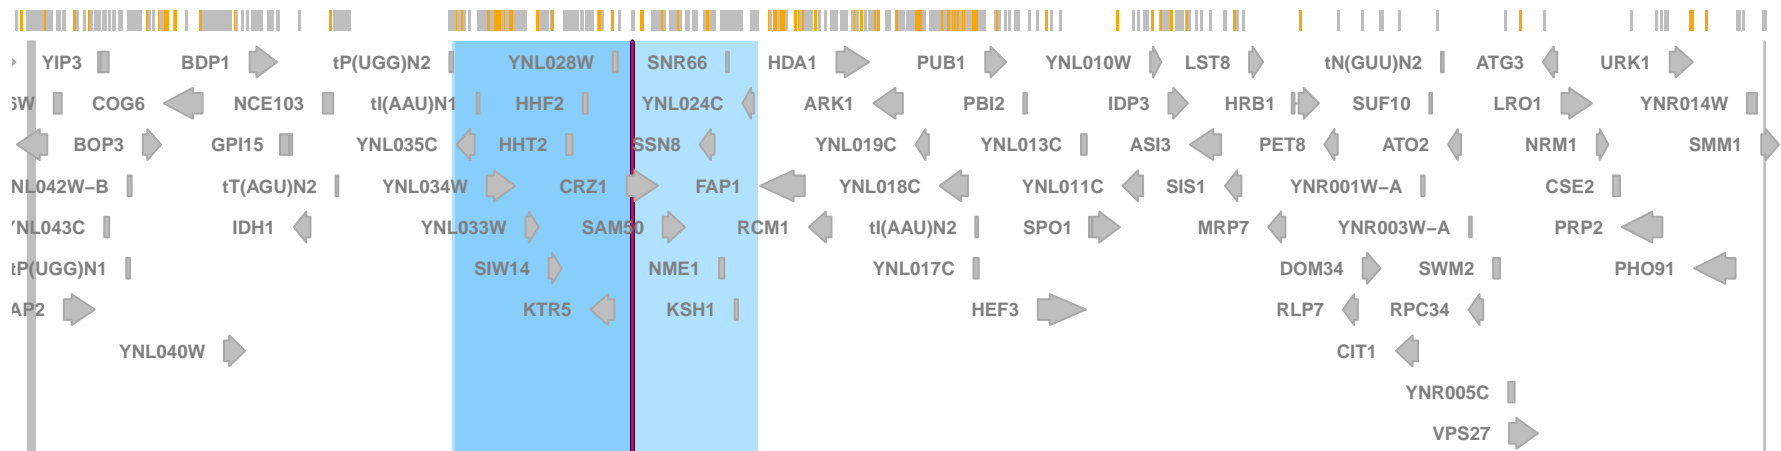

# chrXV:56600\_G/C; 1083 genes affected

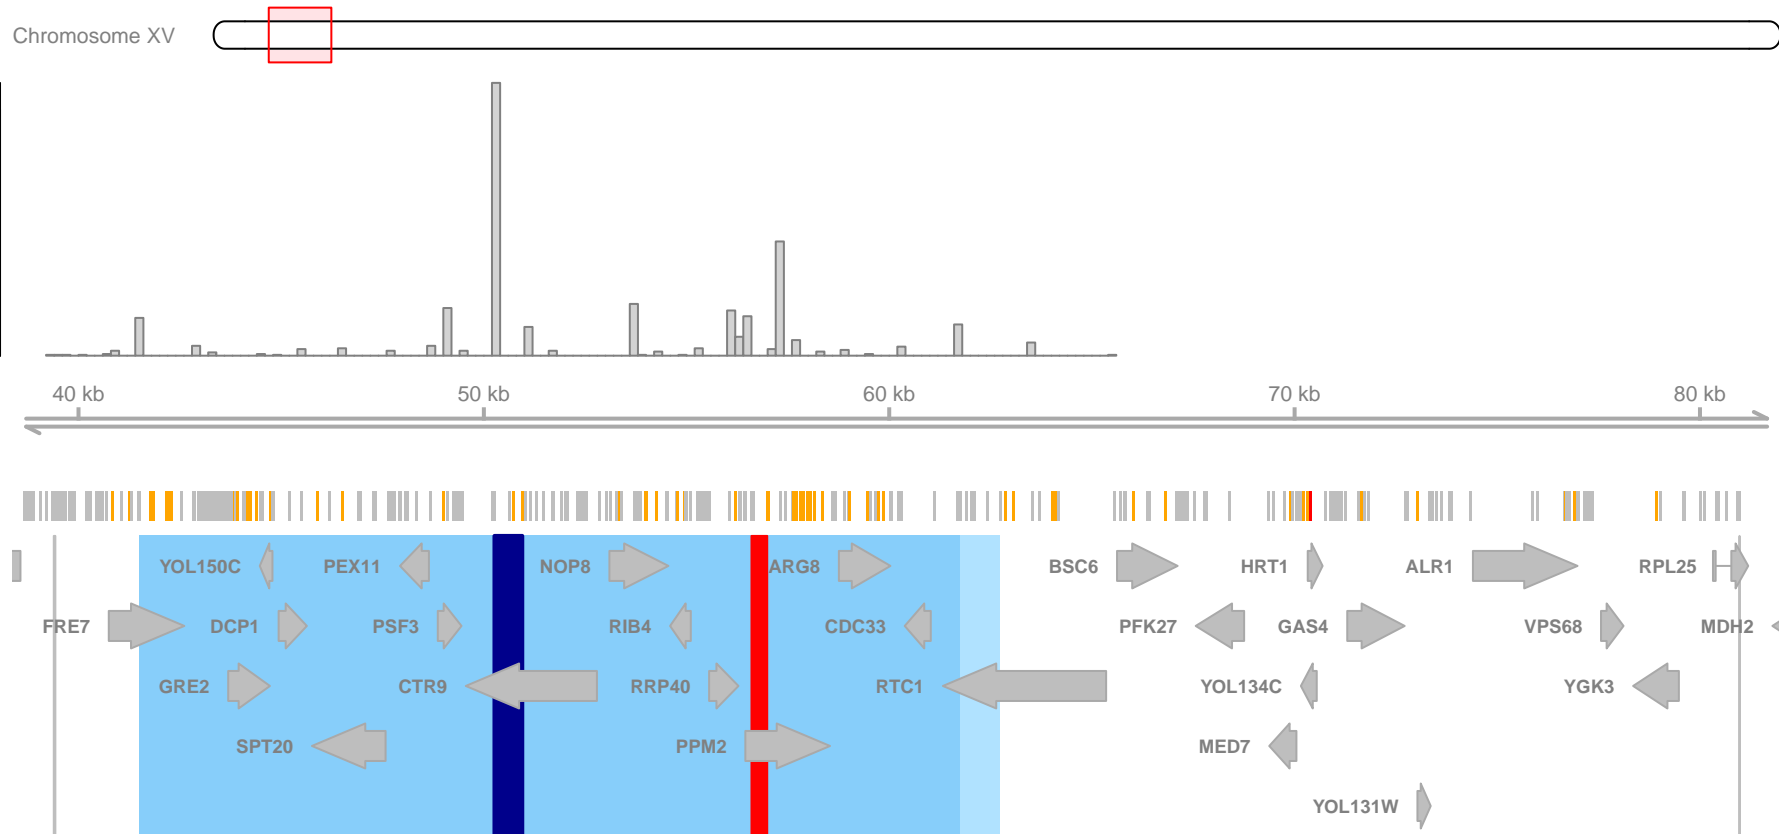

# chrXV:150803\_G/A; 1249 genes affected

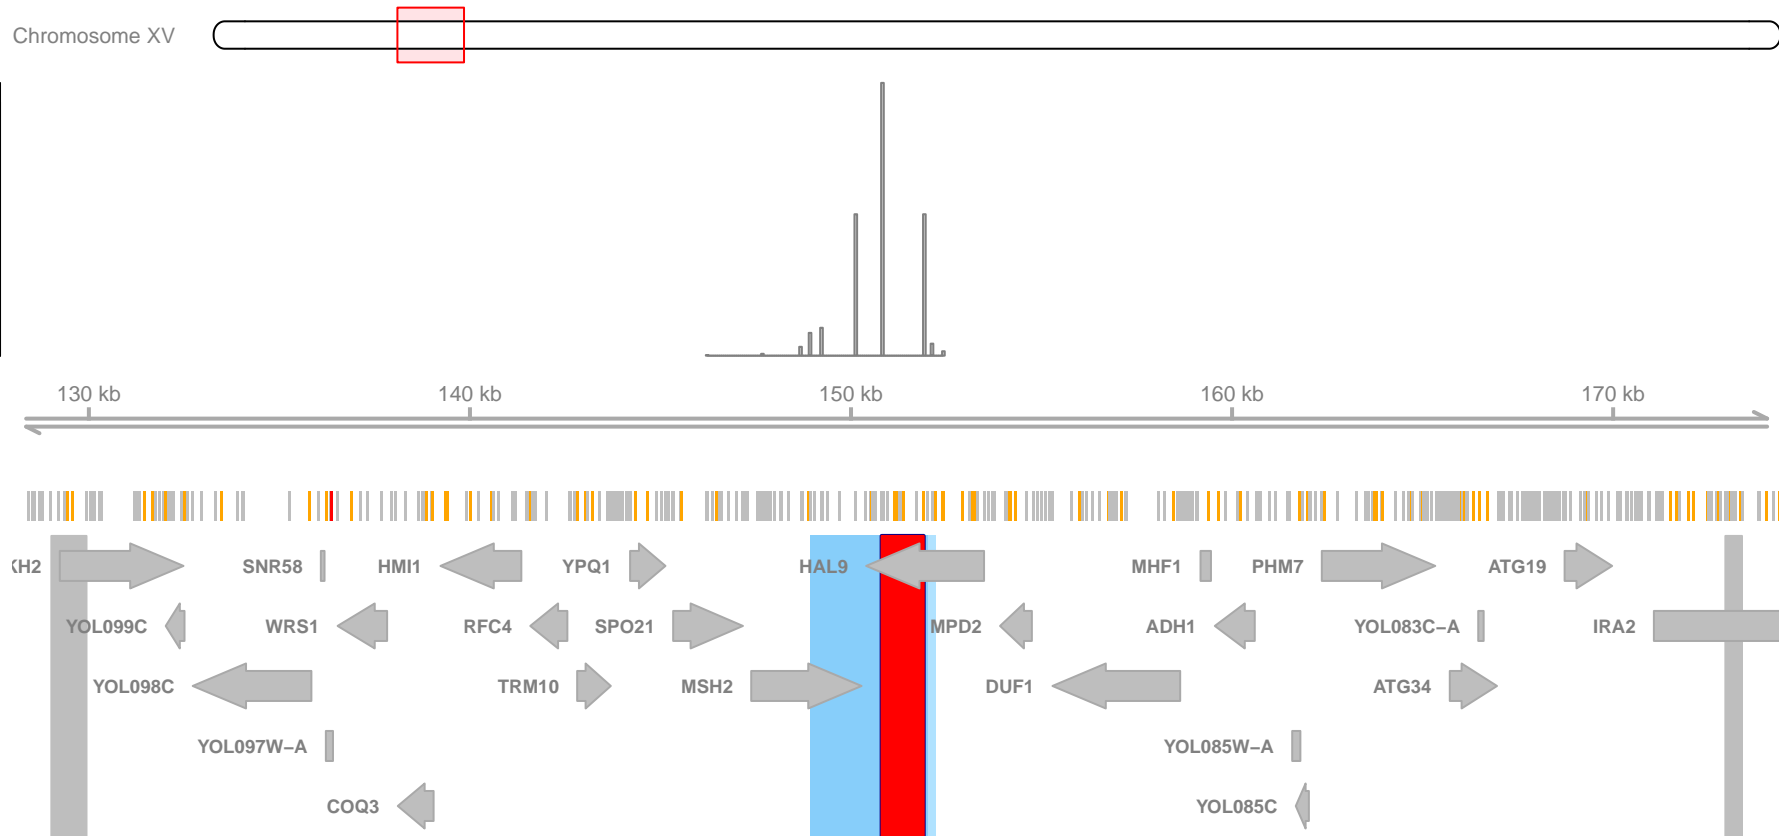

# chrXV:171150\_T/C; 1504 genes affected

Chromosome XV

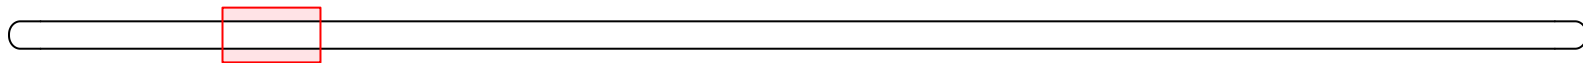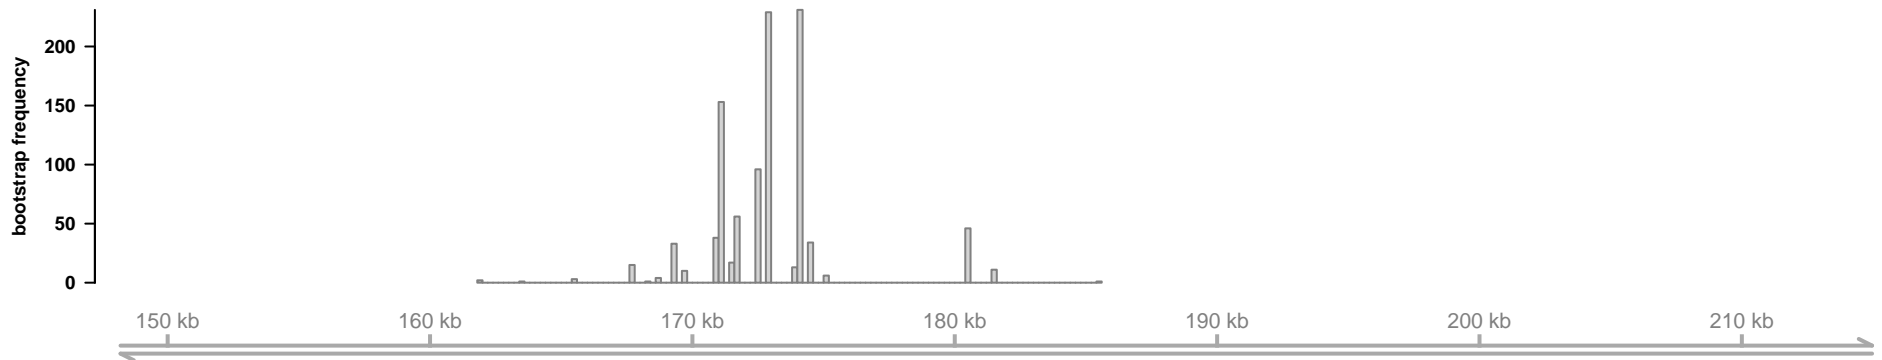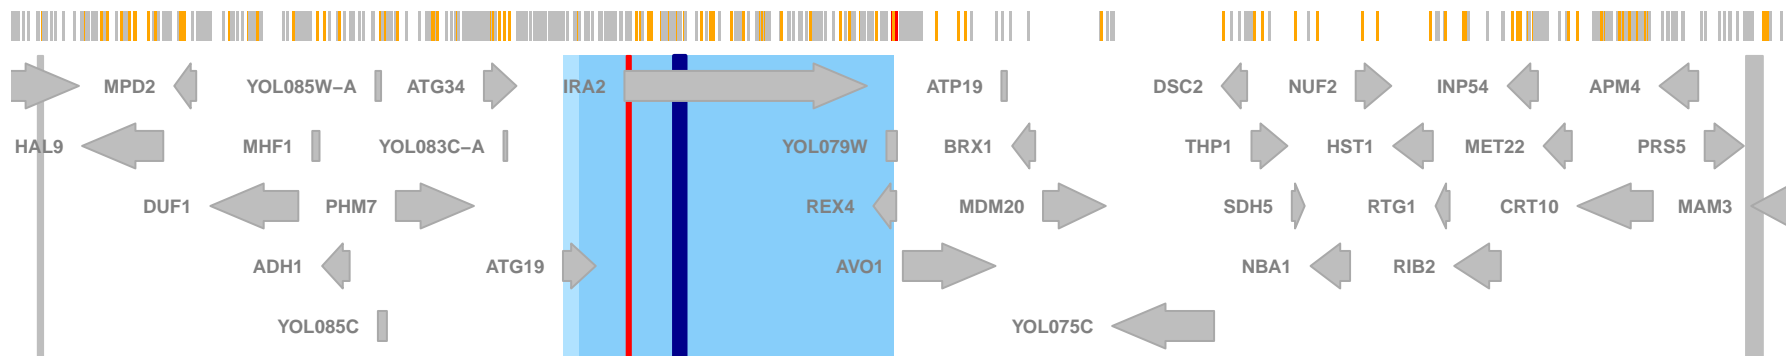



# chrXV:377605\_C/T; 1138 genes affected

Chromosome XV

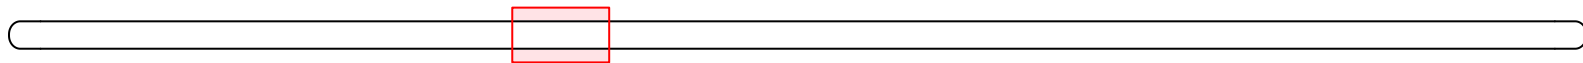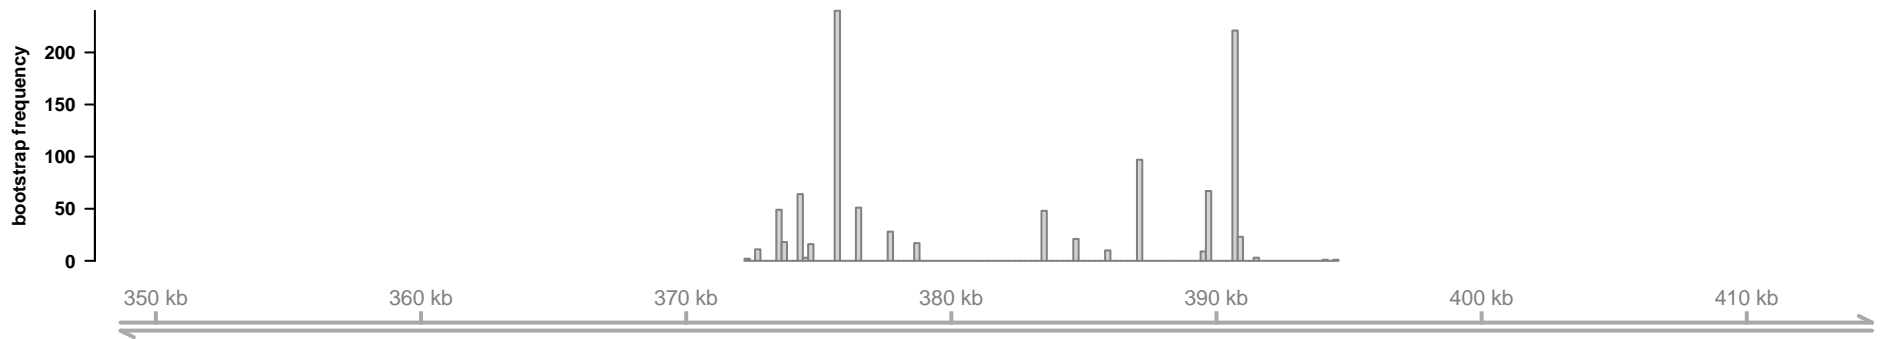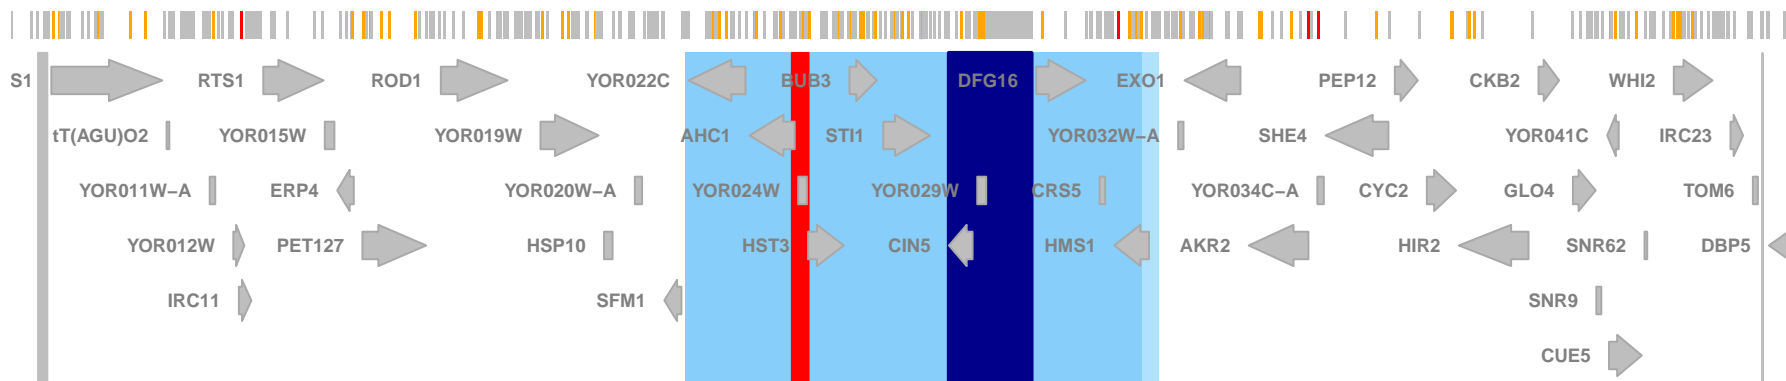

# chrXV:521864\_C/T; 1414 genes affected

Chromosome XV

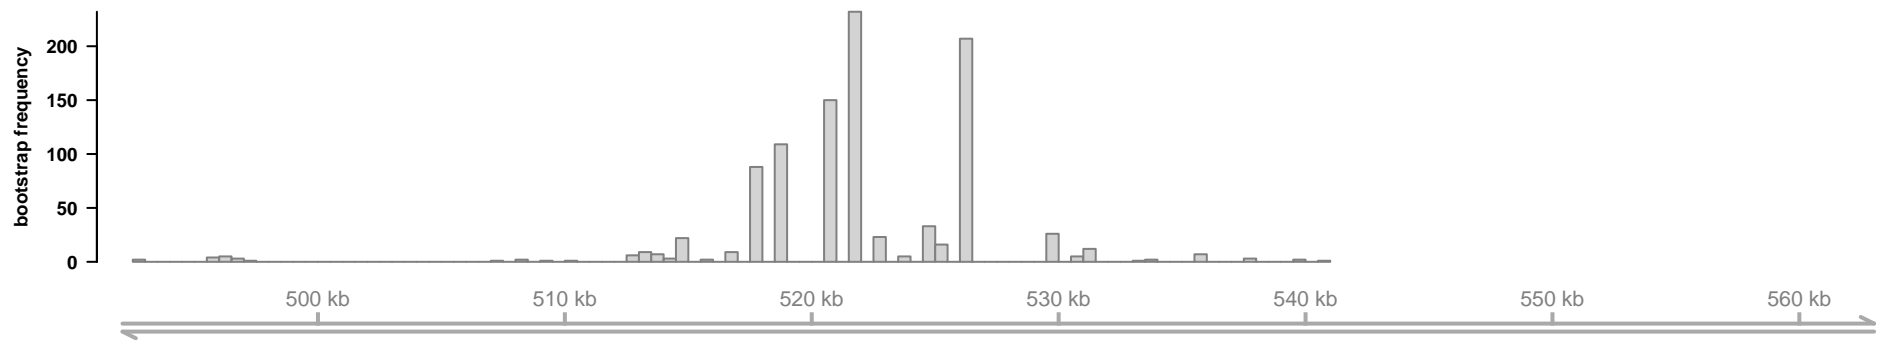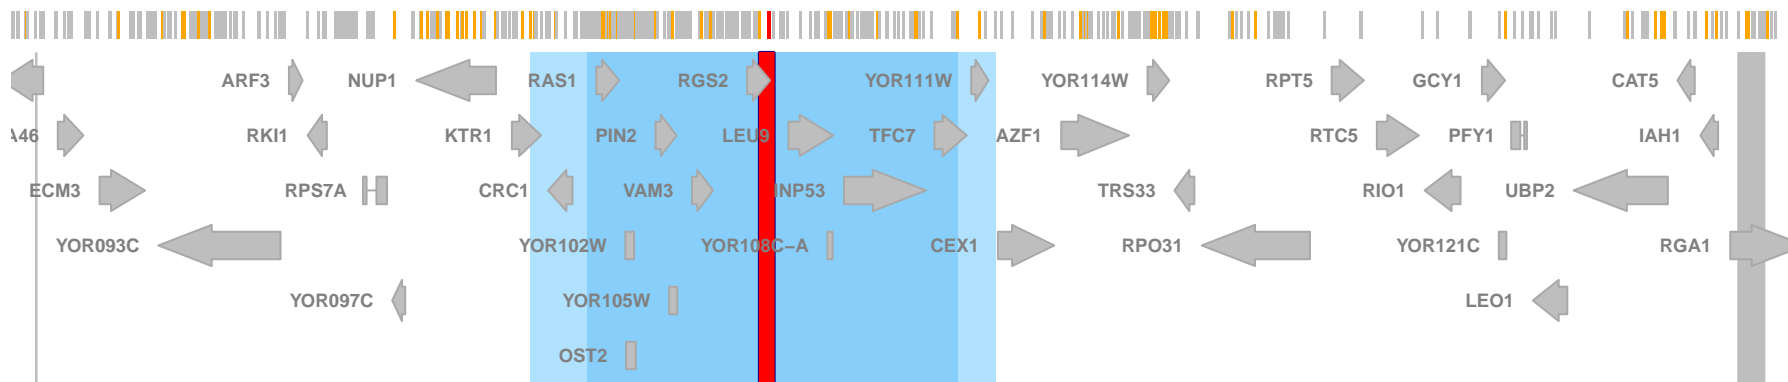

# chrXV:589481\_C/T; 1019 genes affected

Chromosome XV

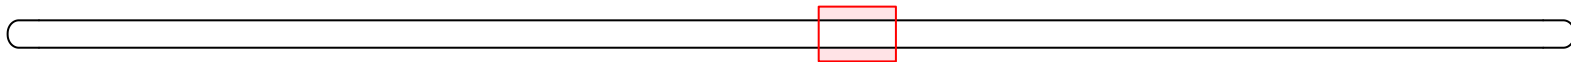

bootstrap frequency

500  
400  
300  
200  
100  
0

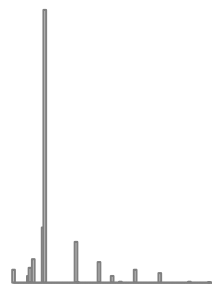

570 kb

580 kb

590 kb

600 kb

610 kb

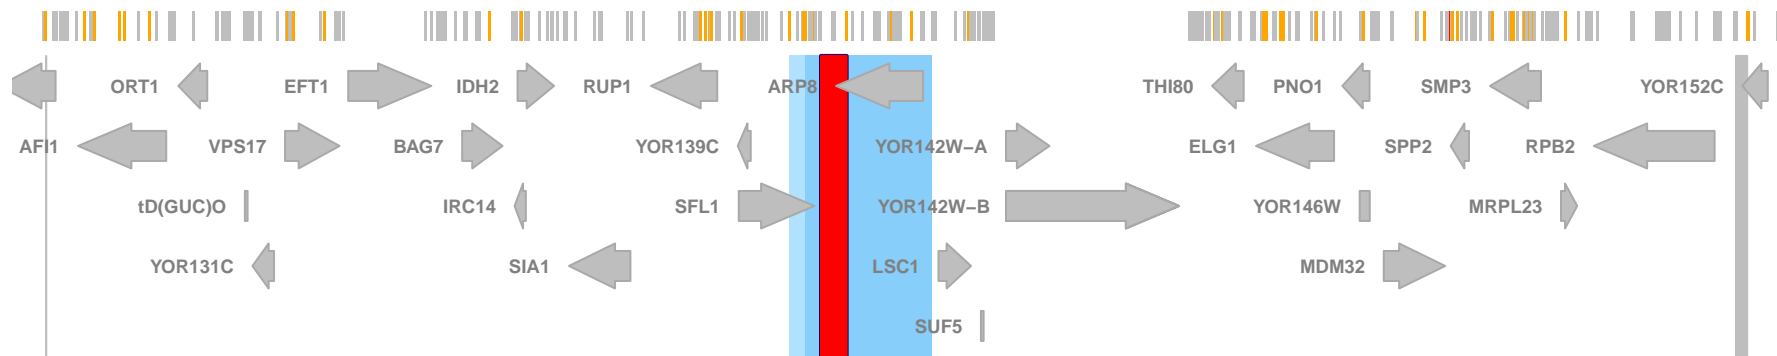

# chrXV:725113\_T/C; 822 genes affected

Chromosome XV

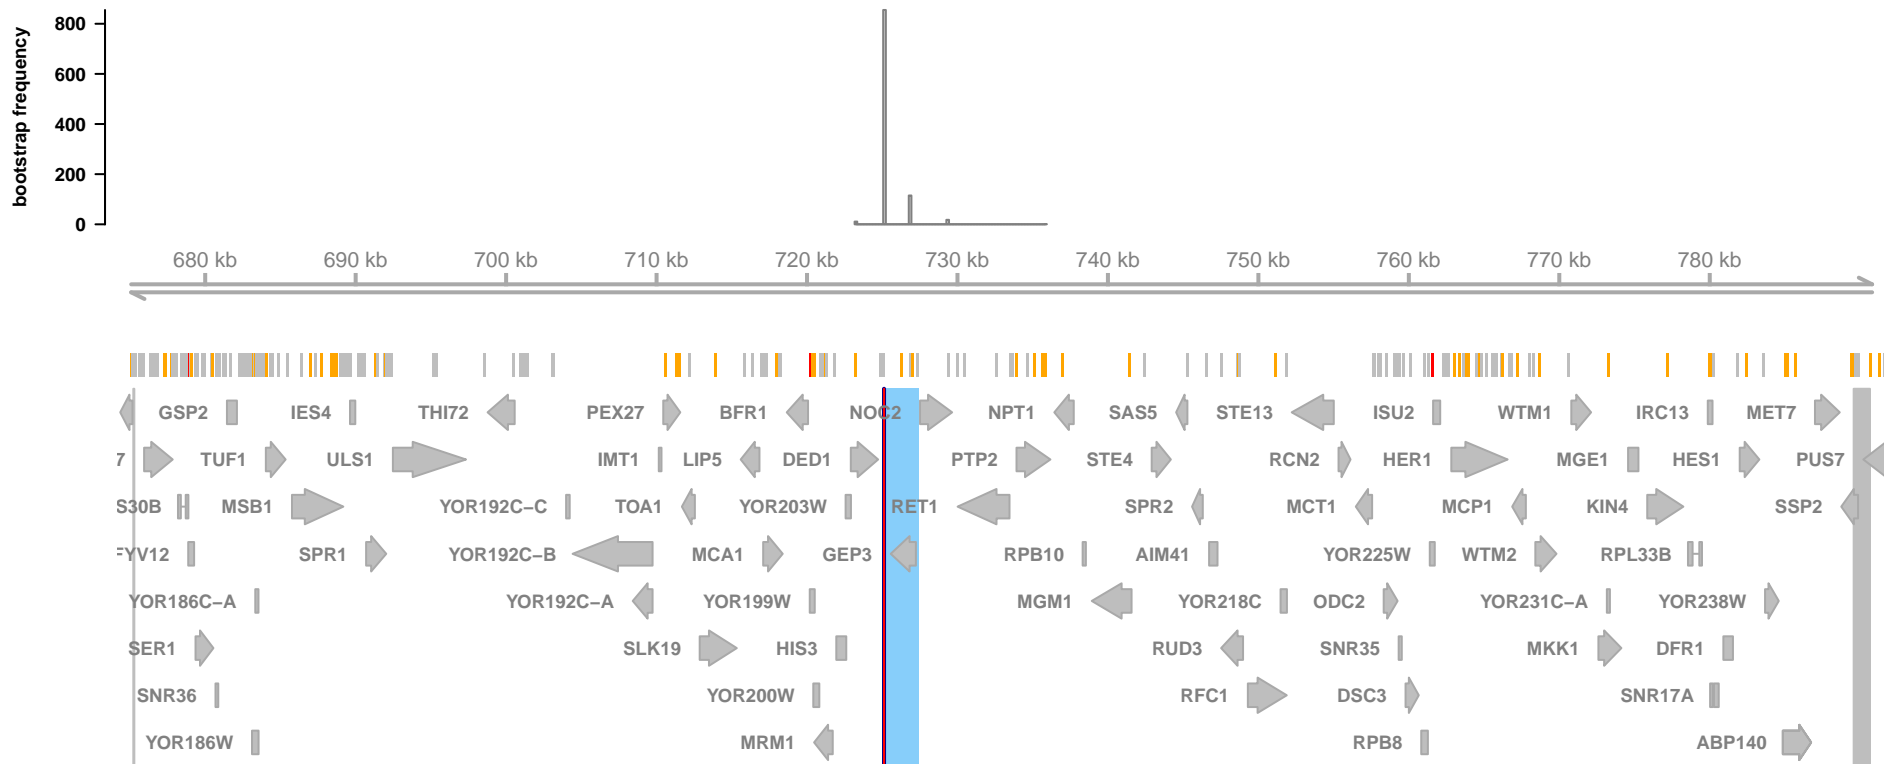

# chrXV:845199\_G/A; 832 genes affected

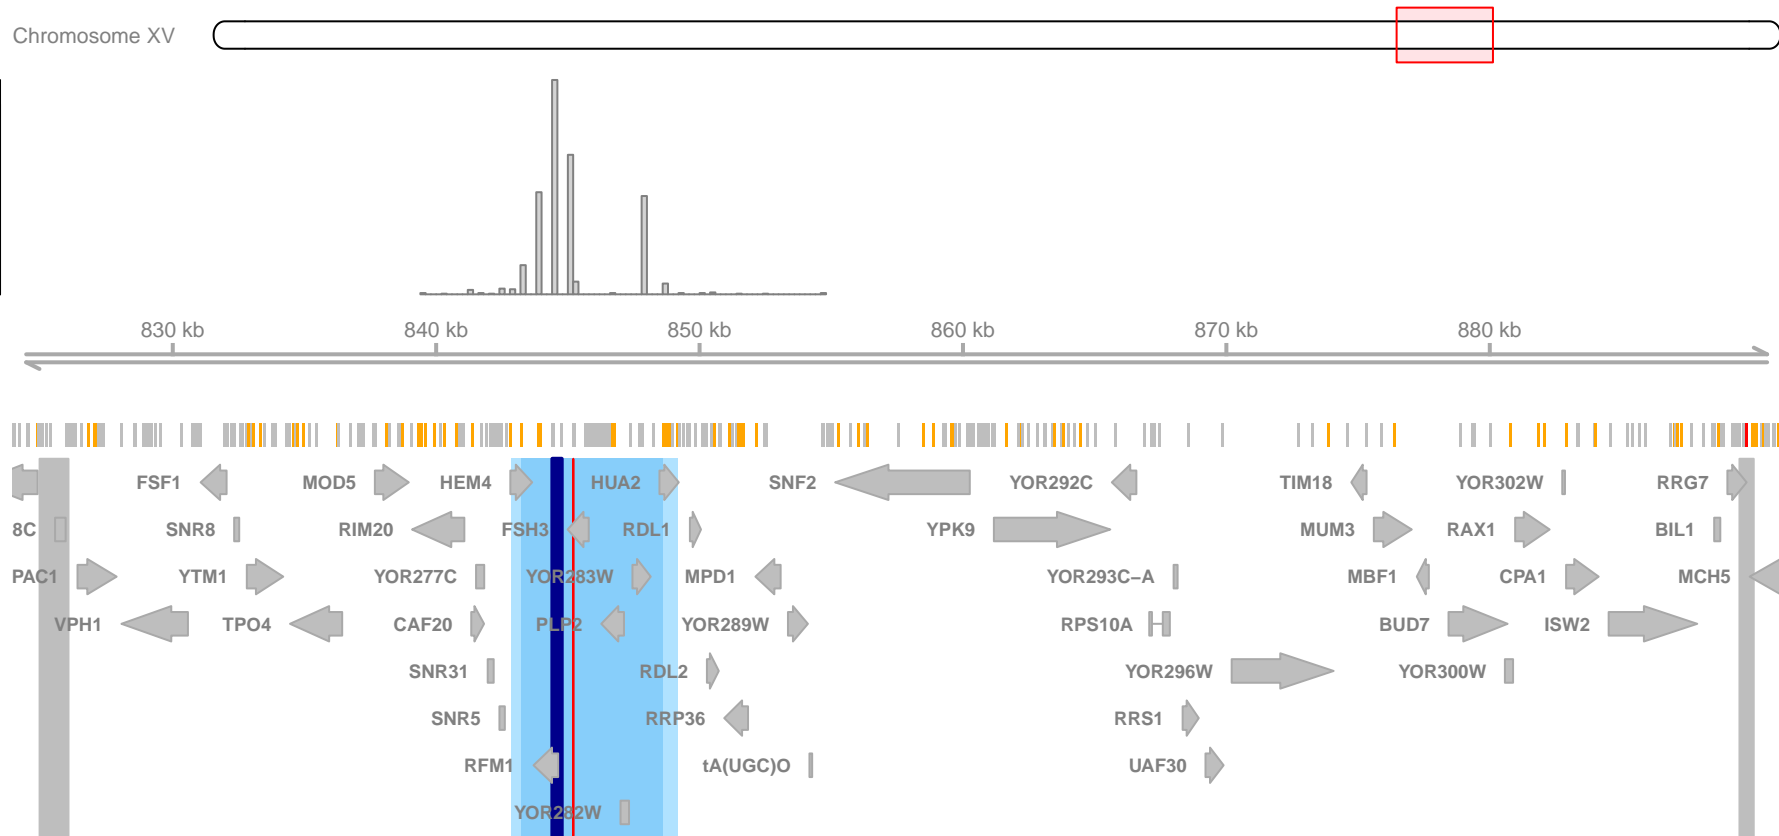

# chrXV:958080\_T/A; 593 genes affected

Chromosome XV

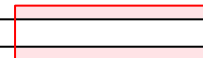

bootstrap frequency

600  
400  
200  
0

900 kb 910 kb 920 kb 930 kb 940 kb 950 kb 960 kb 970 kb 980 kb 990 kb 1000 kb 1010 kb 1020 kb

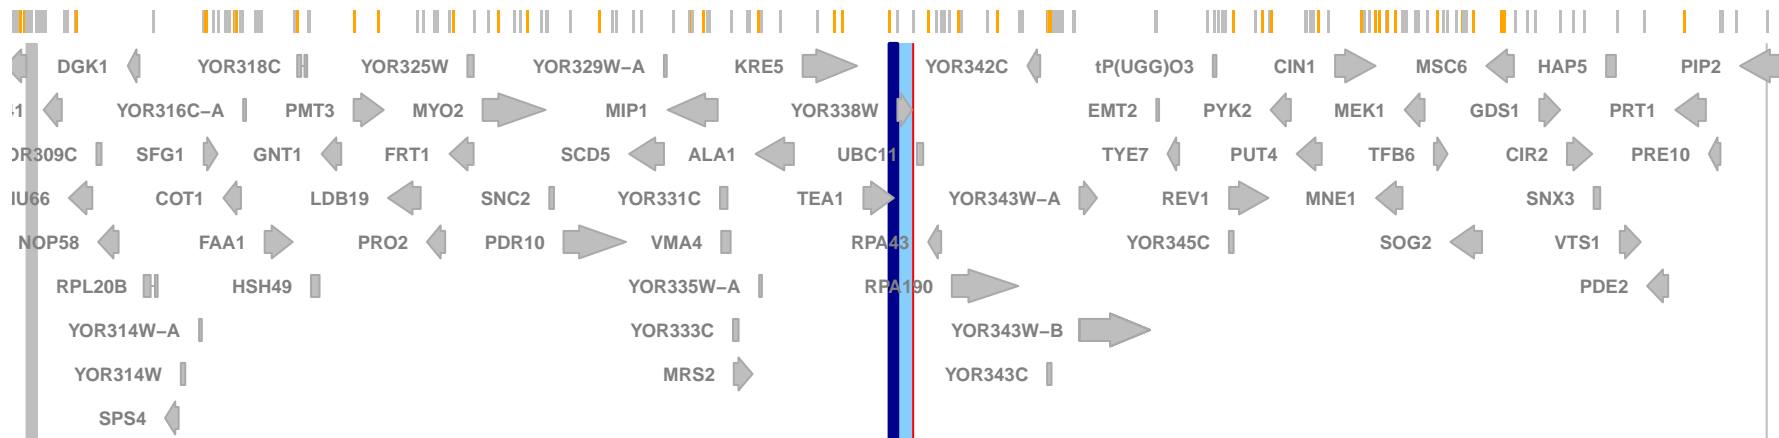

# chrXV:1065815\_A/G; 470 genes affected

Chromosome XV

bootstrap frequency

800  
600  
400  
200  
0

990 kb 1000 kb 1010 kb 1020 kb 1030 kb 1040 kb 1050 kb 1060 kb 1070 kb

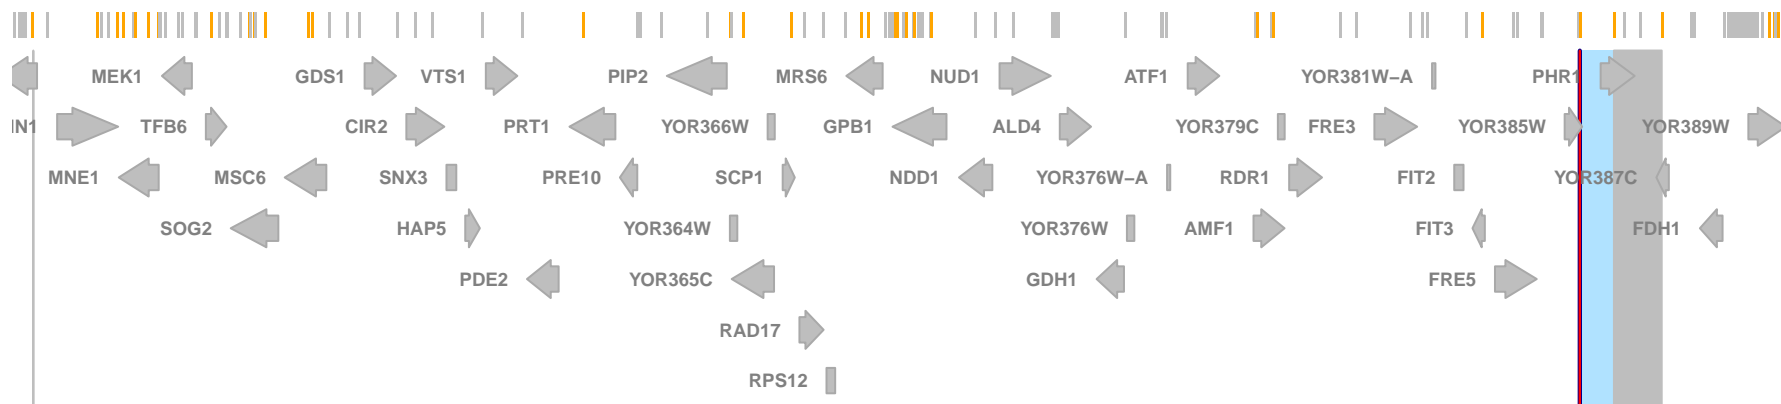





# chrXVI:84945\_G/A; 399 genes affected

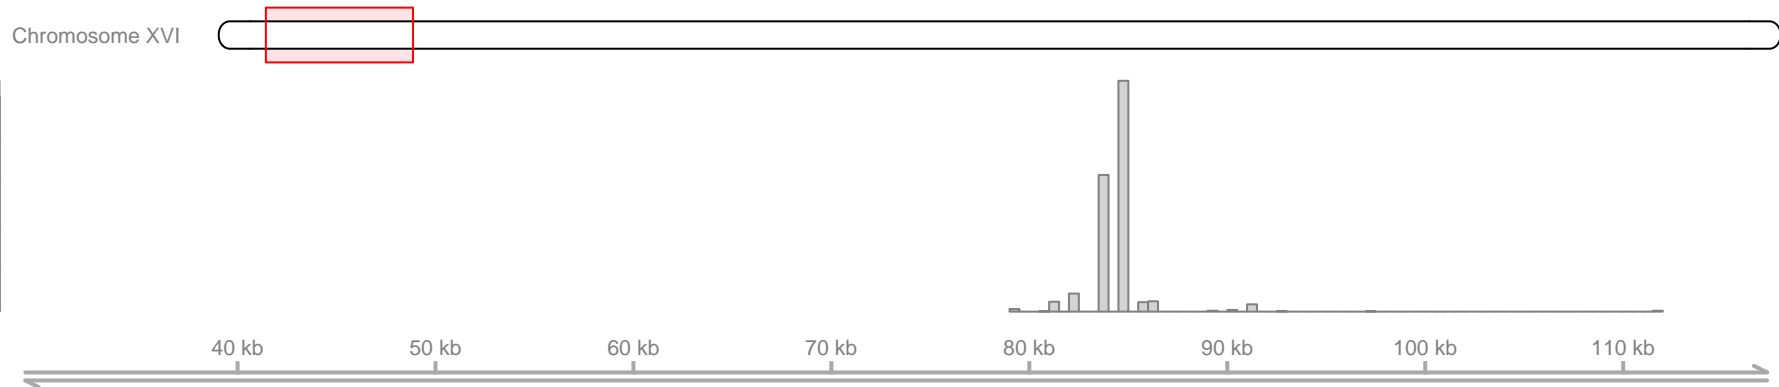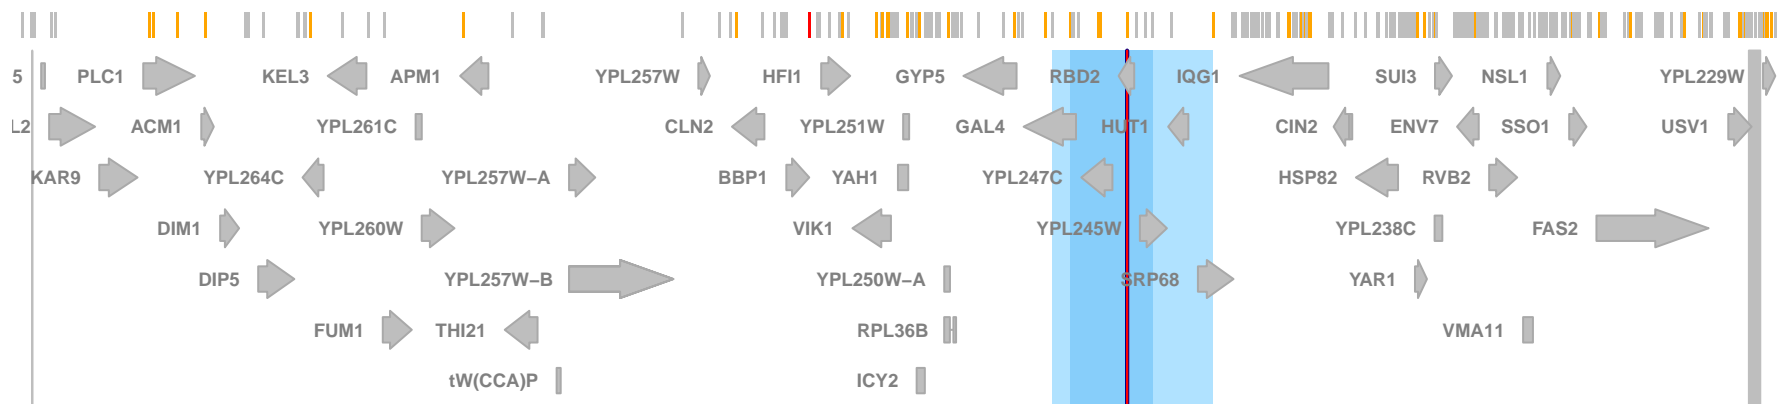

# chrXVI:207364\_C/T; 471 genes affected

Chromosome XVI

bootstrap frequency

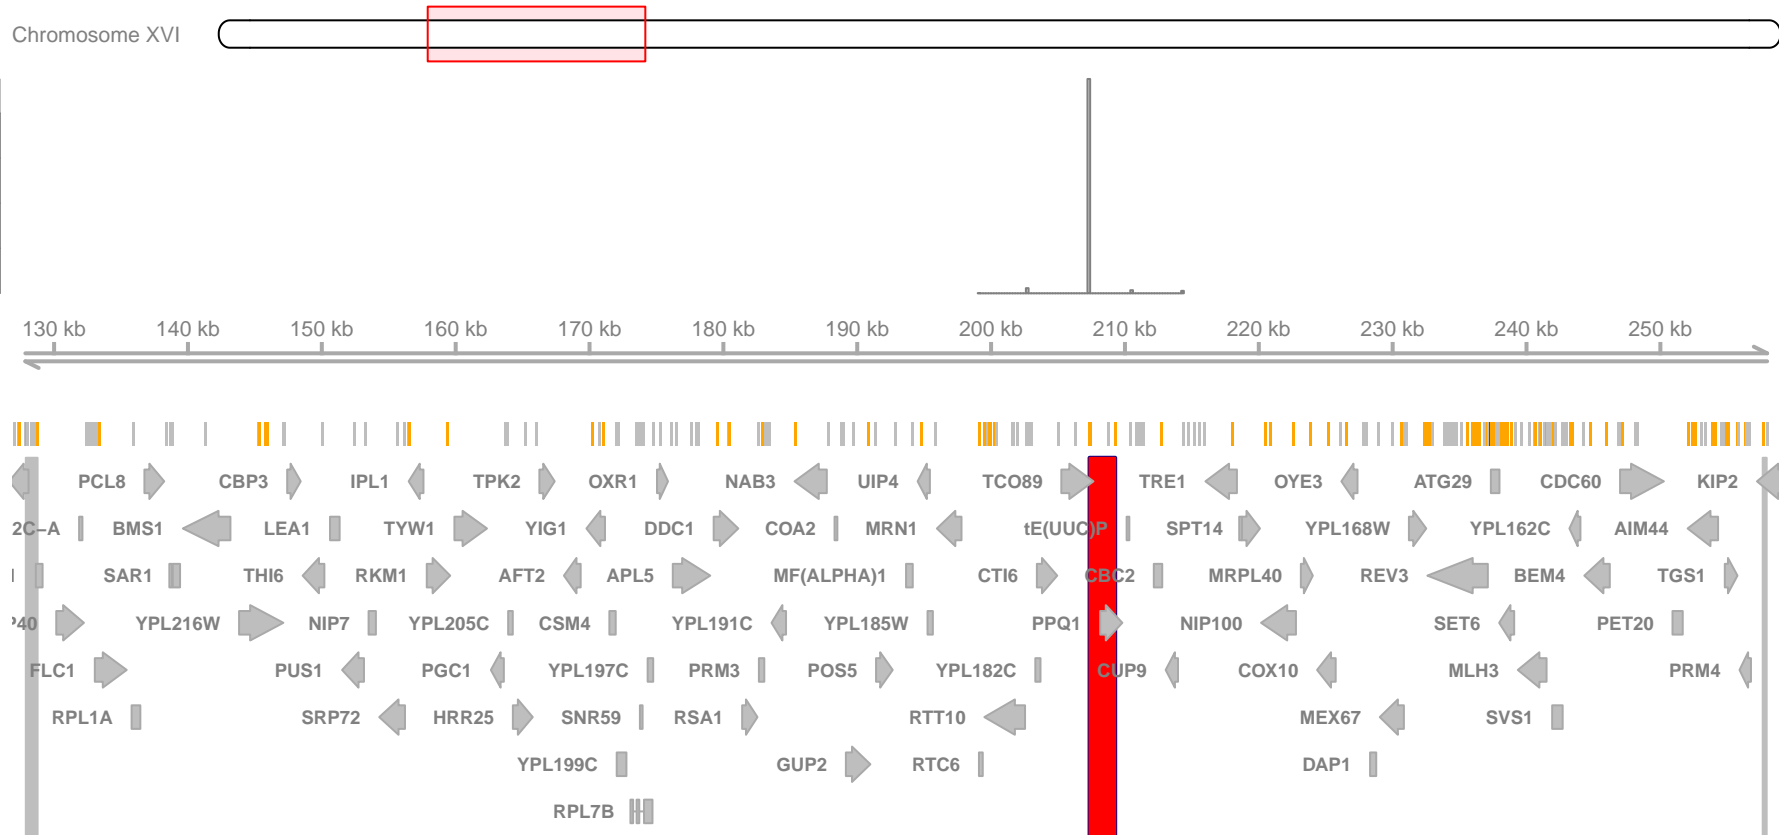

# chrXVI:383928\_G/A; 193 genes affected

Chromosome XVI

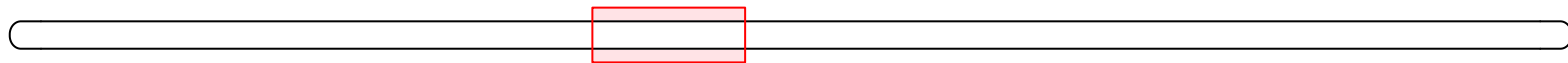

bootstrap frequency

400  
300  
200  
100  
0

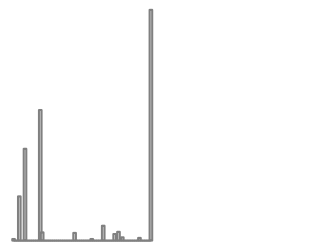

360 kb

370 kb

380 kb

390 kb

400 kb

410 kb

420 kb

430 kb

440 kb

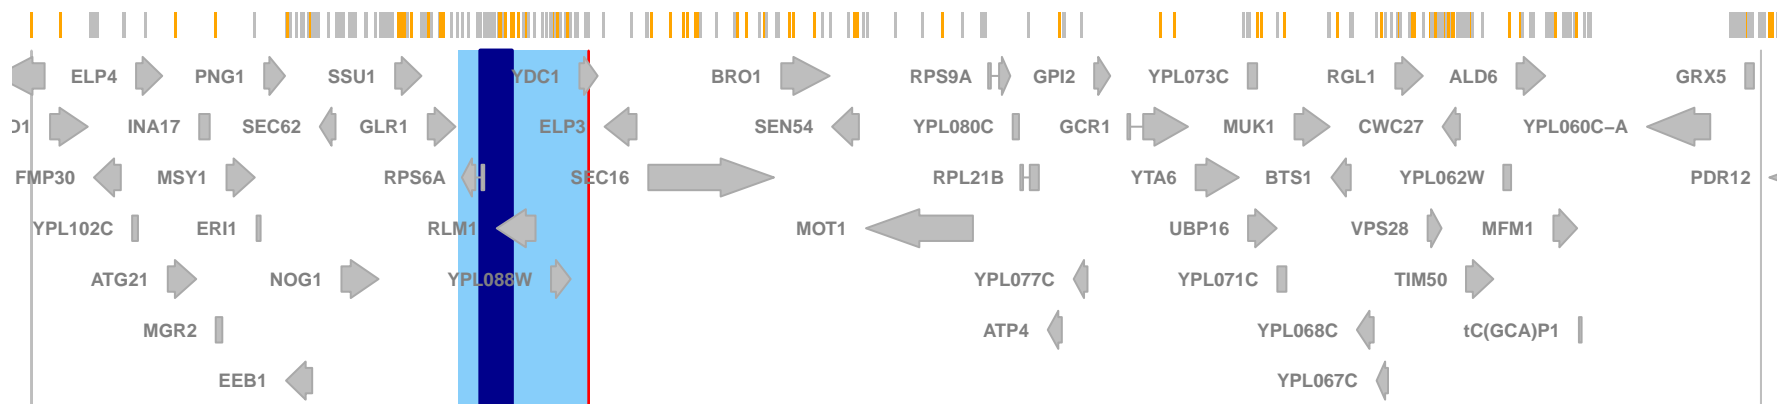

# chrXVI:463543\_G/A; 371 genes affected

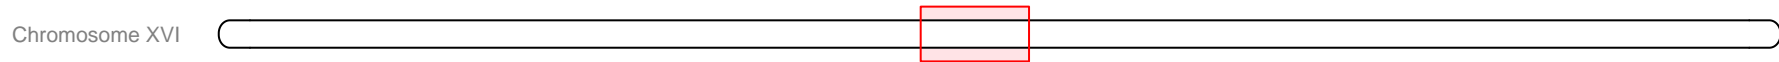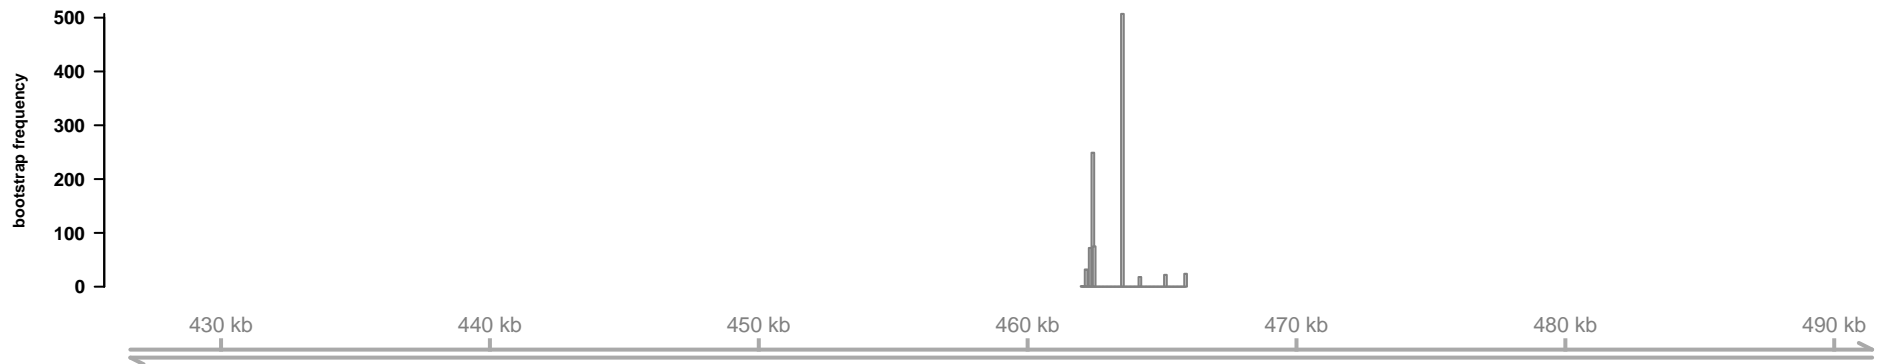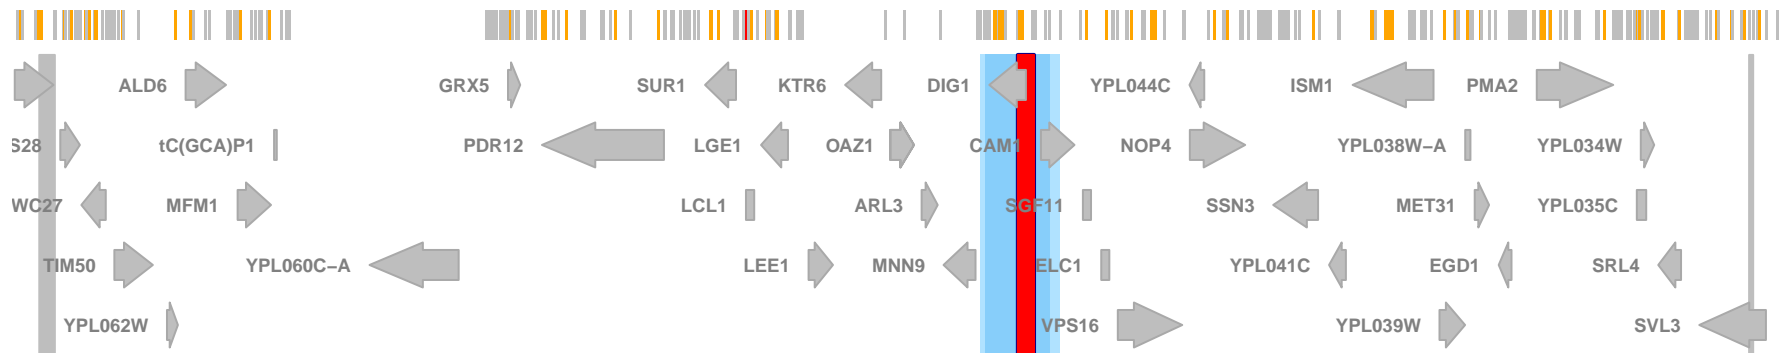

# chrXVI:508199\_C/T; 578 genes affected

Chromosome XVI

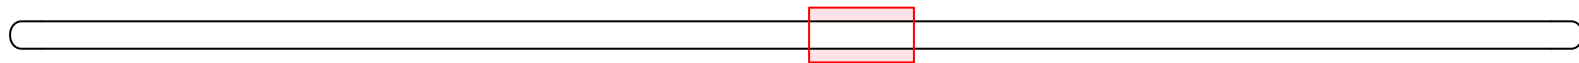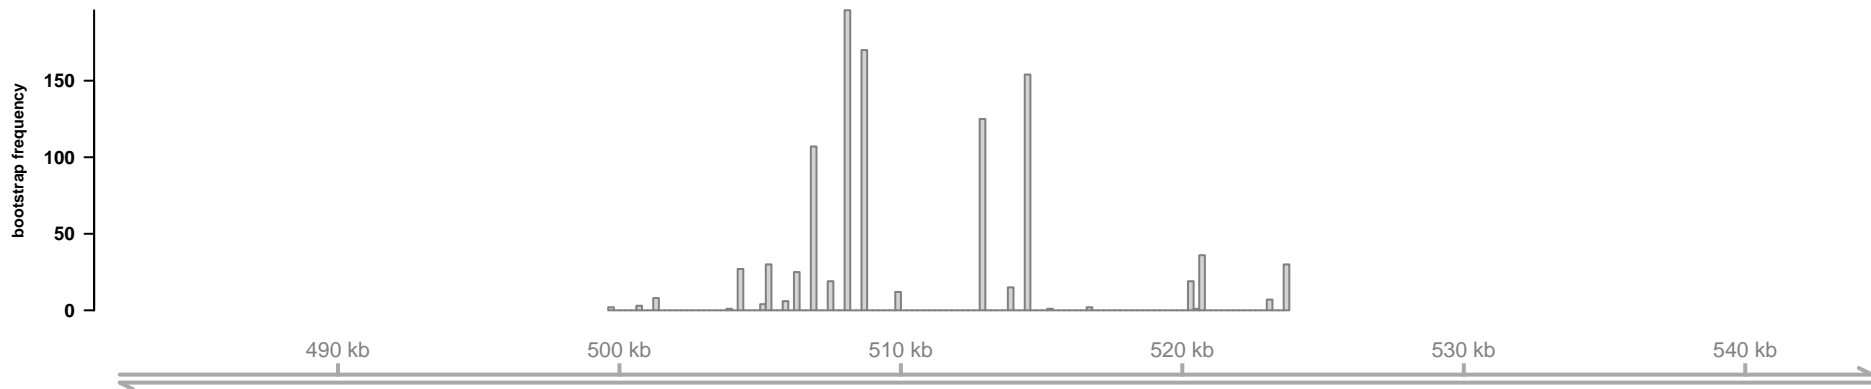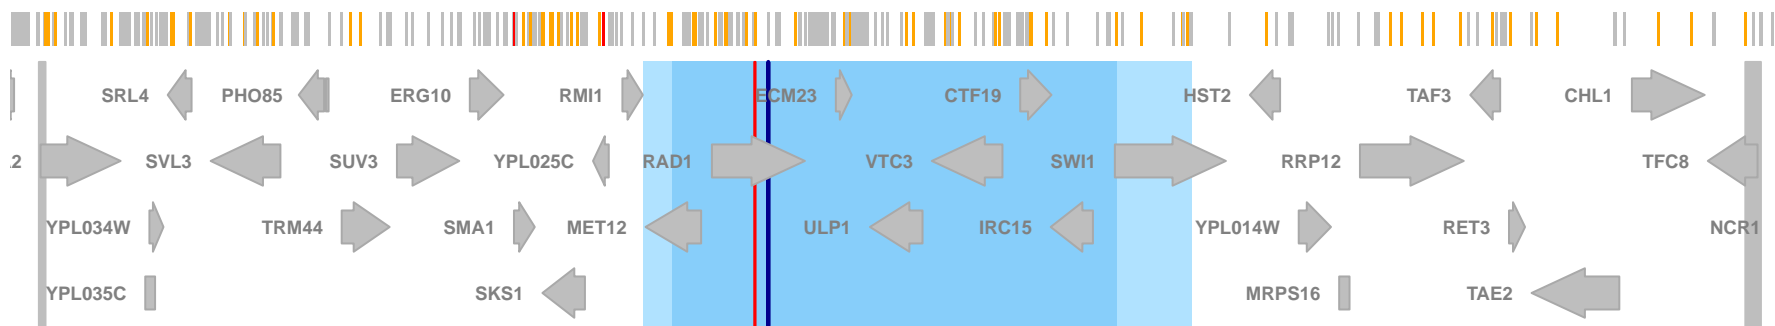

# chrXVI:812990\_T/C; 185 genes affected

Chromosome XVI

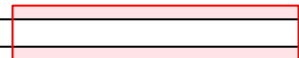

bootstrap frequency

400  
300  
200  
100  
0

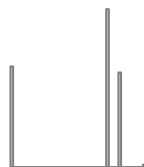

750 kb

800 kb

850 kb

900 kb

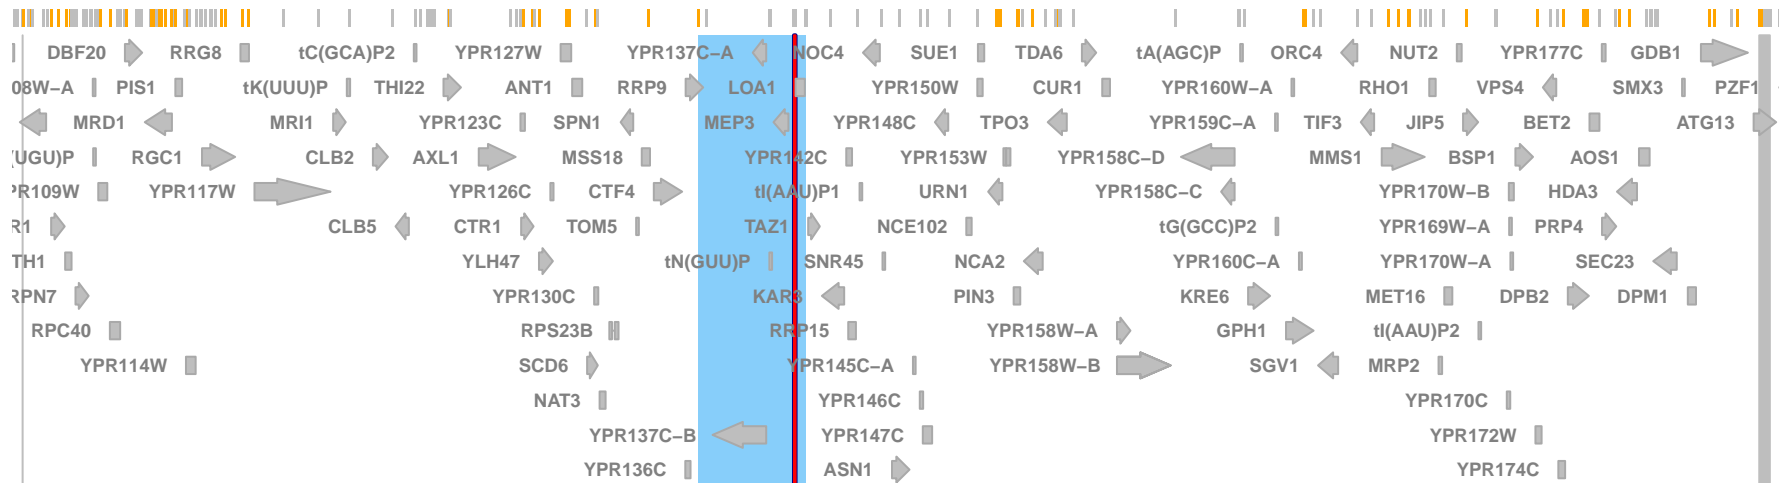

Supplement: elife-35471-supp5.pdf [file elife-35471-supp5.pdf]
