# Supplementary material for: Genetics of trans-regulatory variation in gene expression
Source: PubMed Central journal article supplement (PMC6072440; doi:10.7554/elife.35471), 2018-07-17

chr1:48890\_C/T top 50 up genes

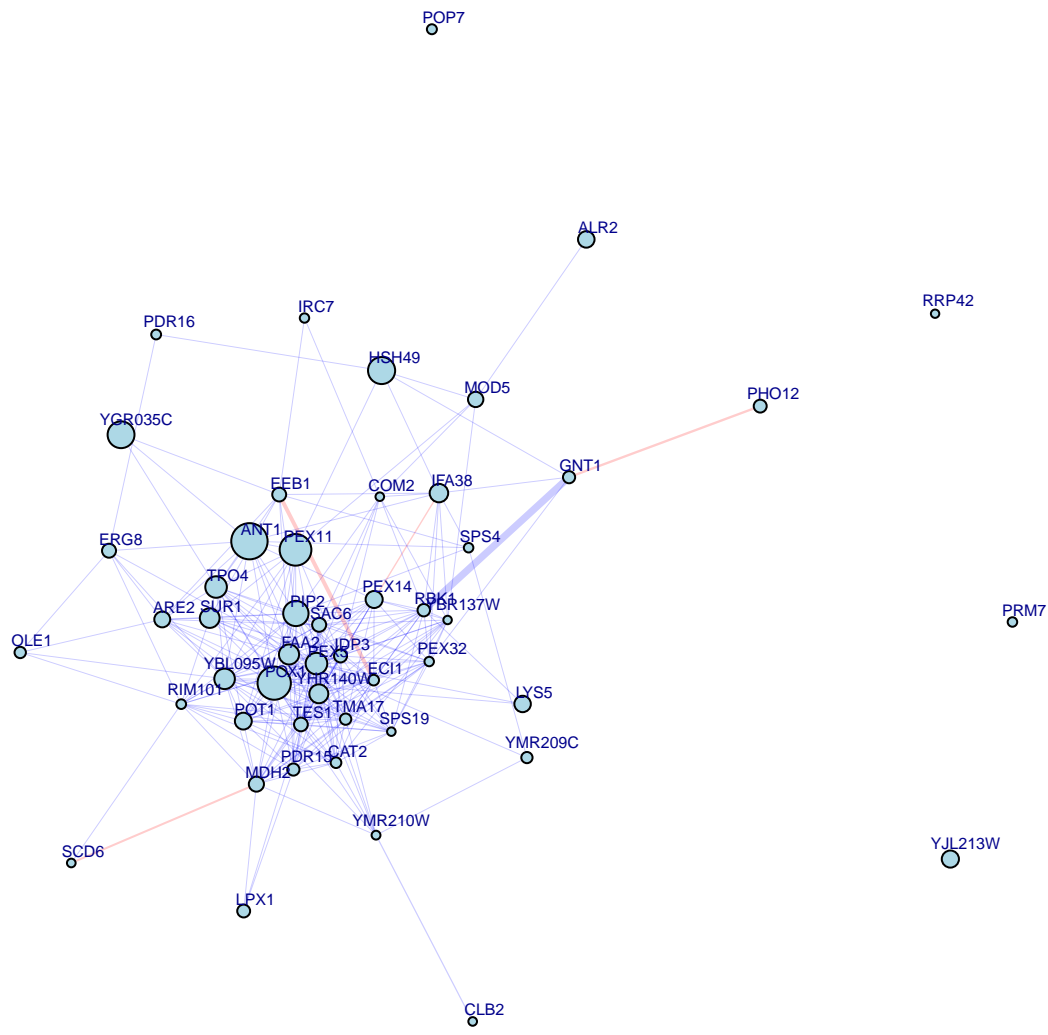

chr1:48890\_C/T top 50 down genes

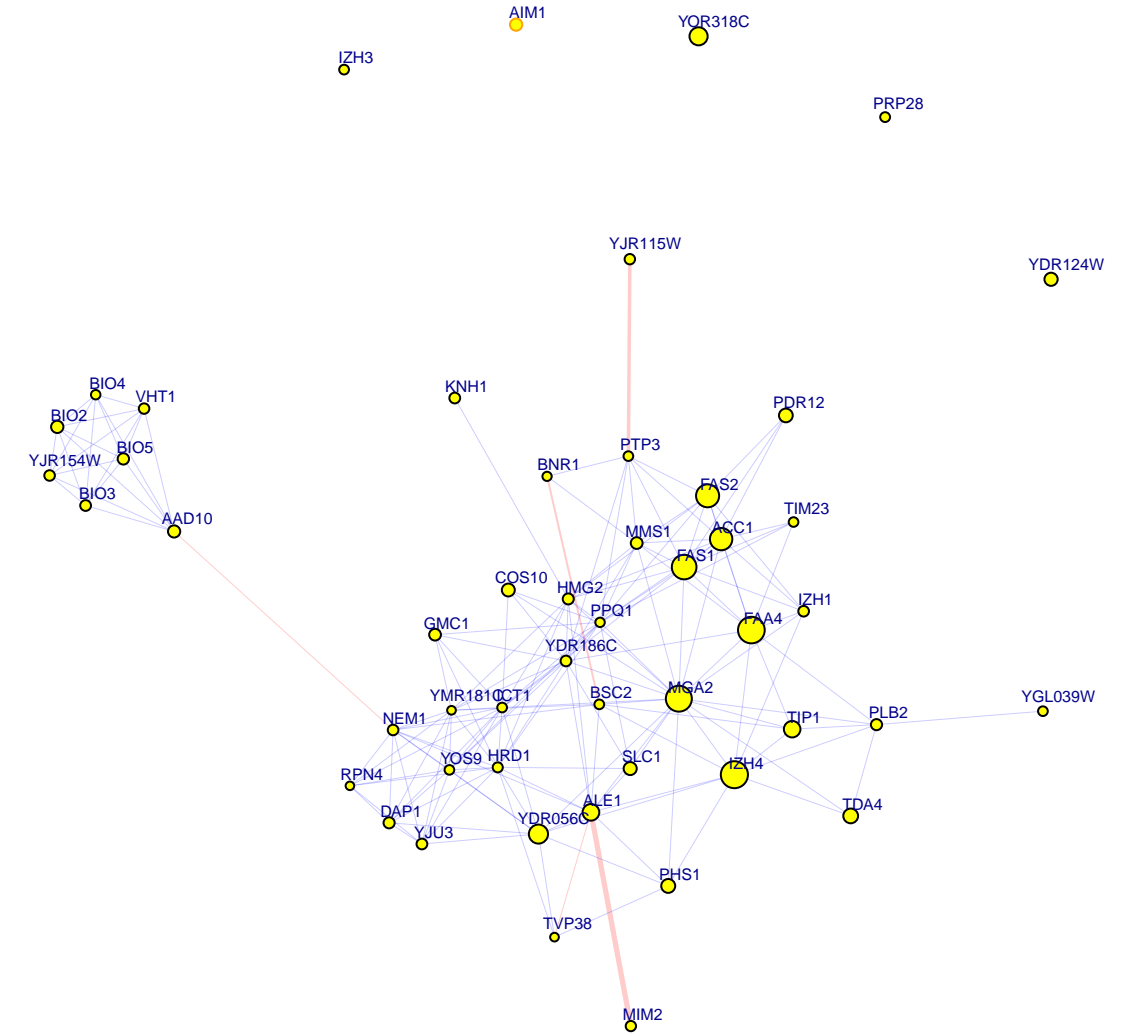

chr1:48890\_C/T top 100 up and down genes

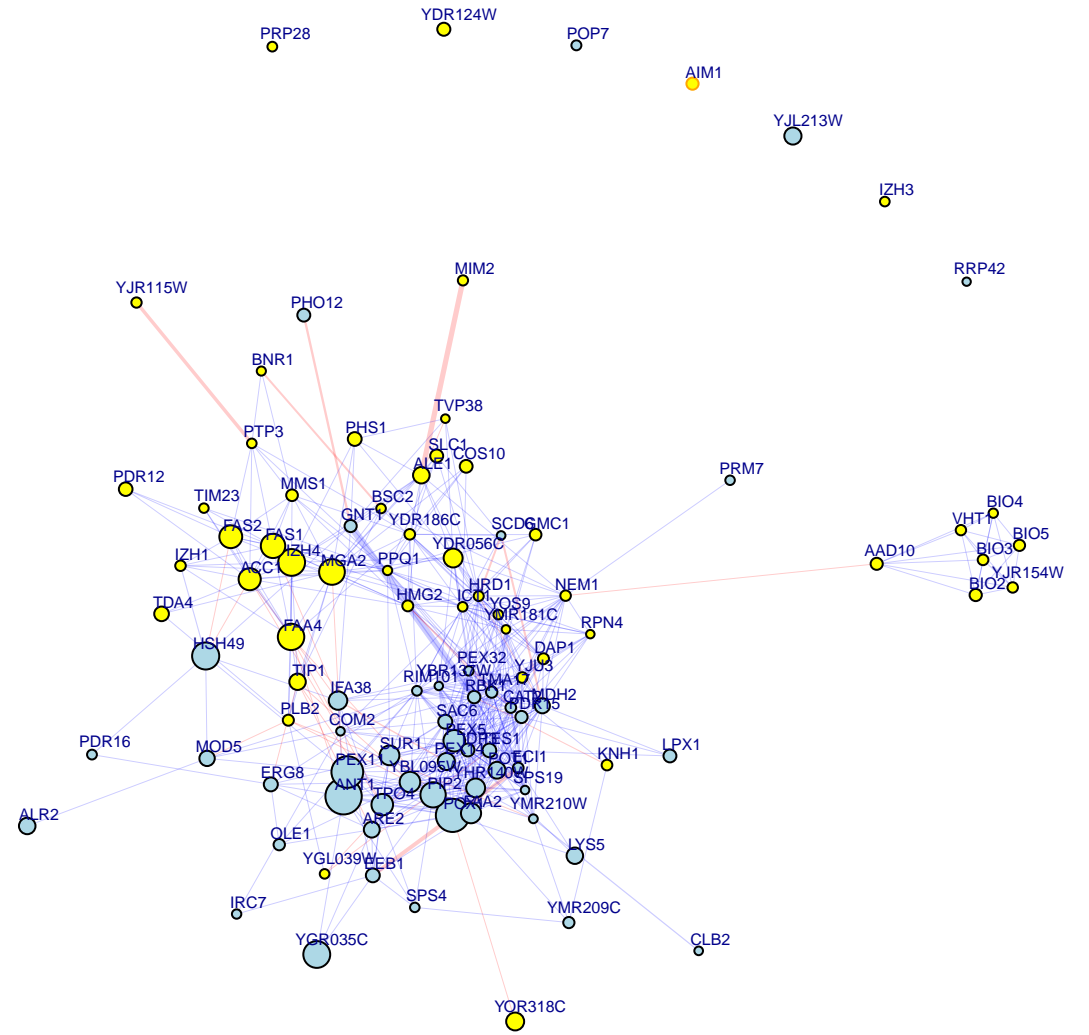

chr1:109735\_A/G top 50 up genes

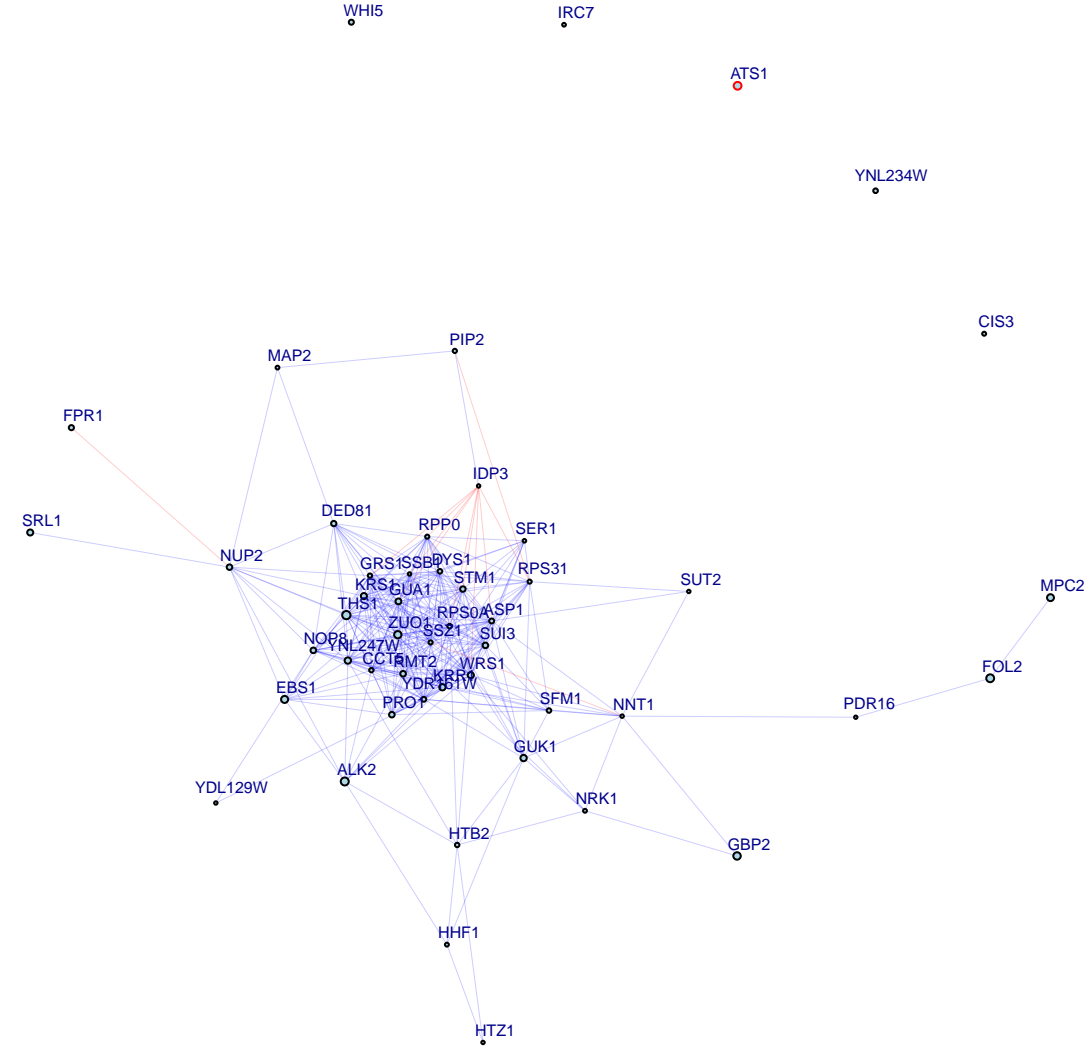

chr1:109735\_A/G top 50 down genes

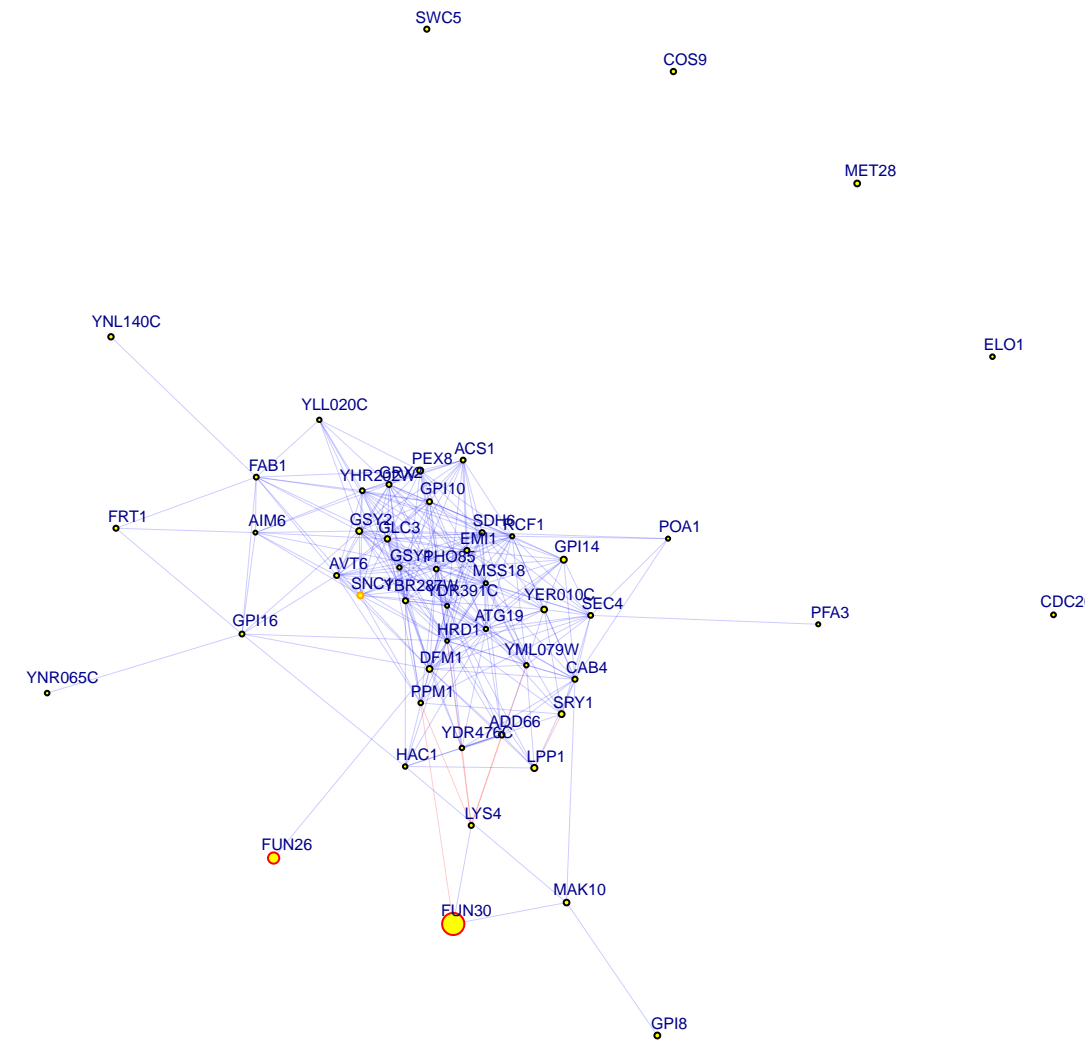

chr1:109735\_A/G top 100 up and down genes

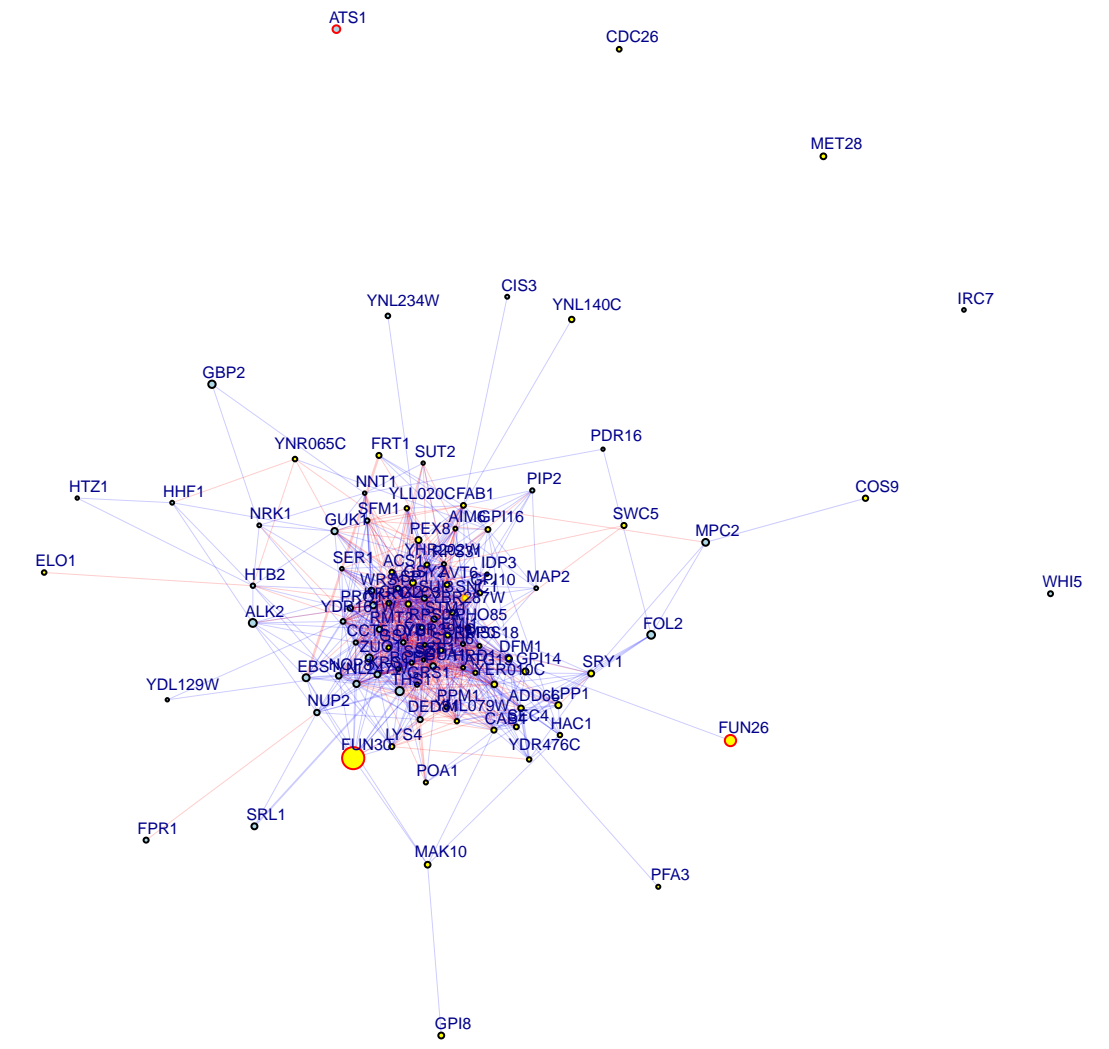

chr1:159467\_G/A top 50 up genes

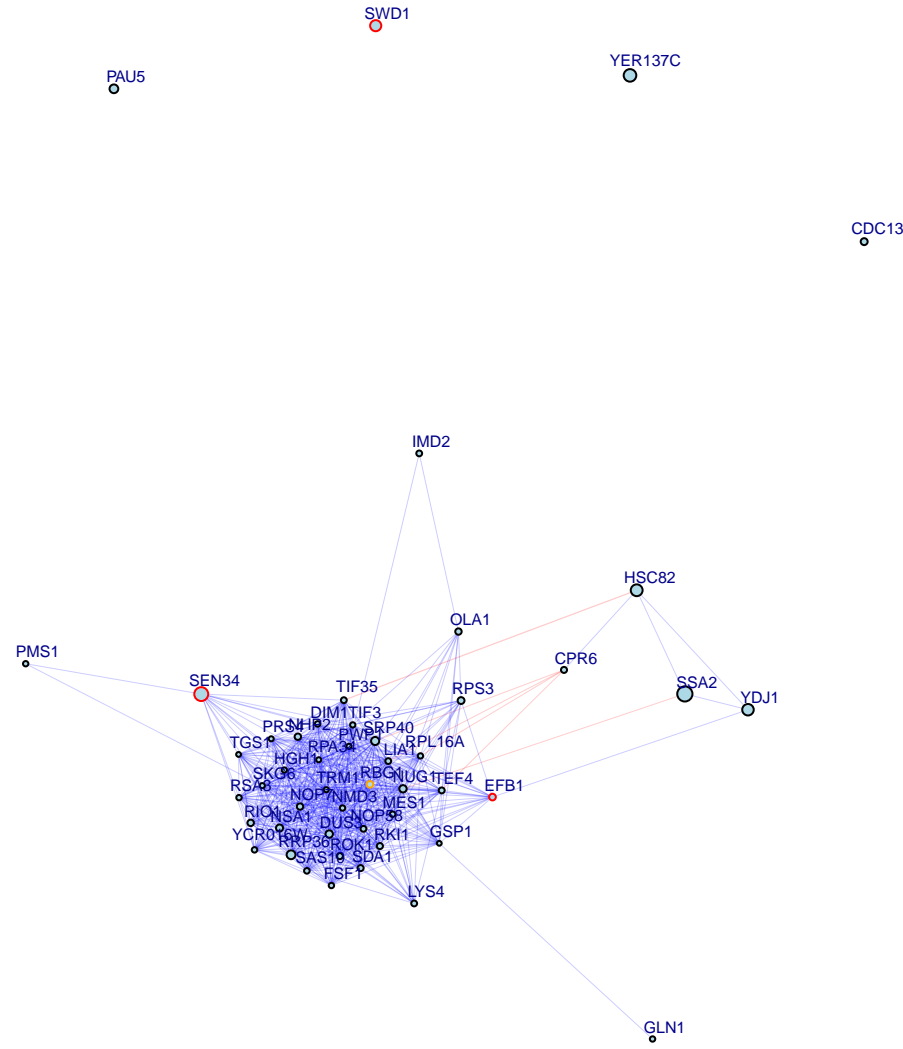

chr1:159467\_G/A top 50 down genes

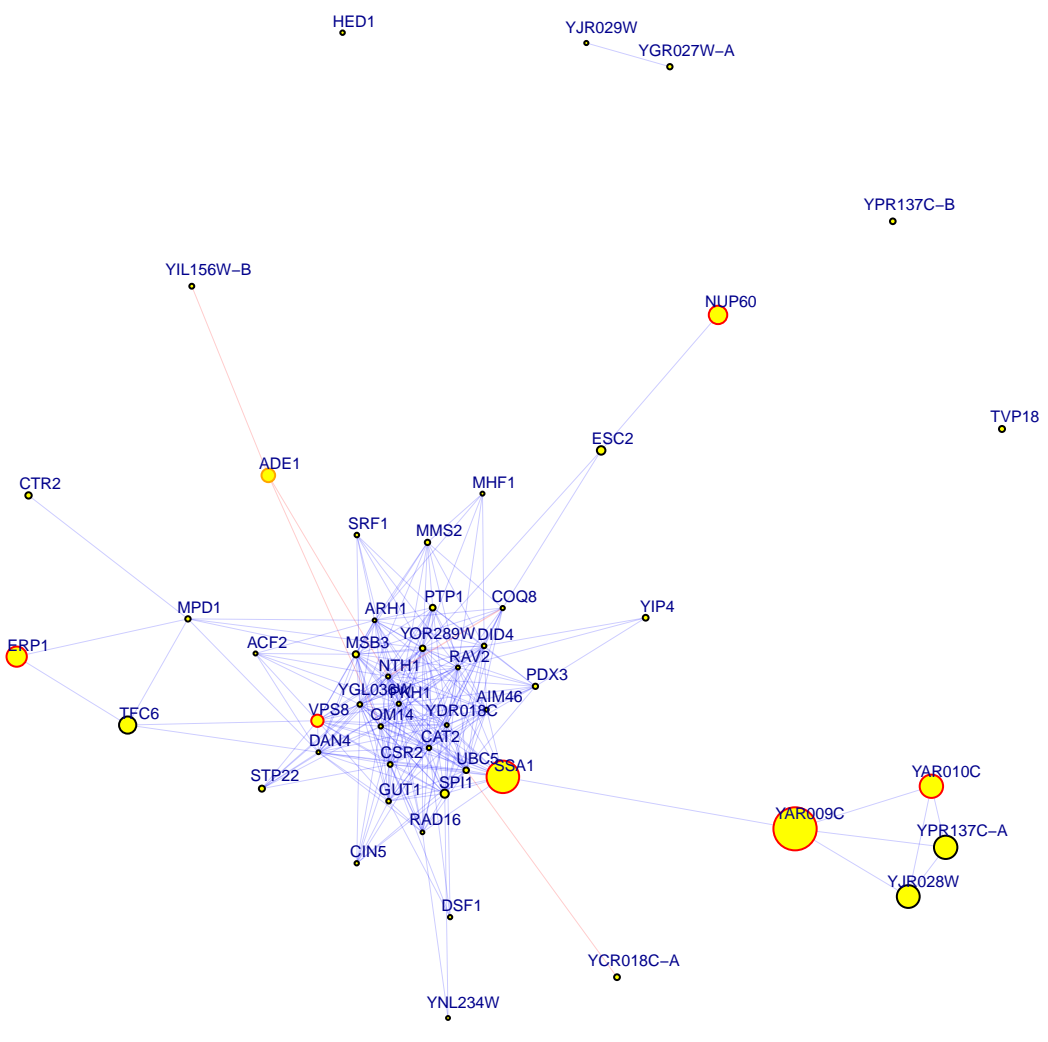

chr1:159467\_G/A top 100 up and down genes

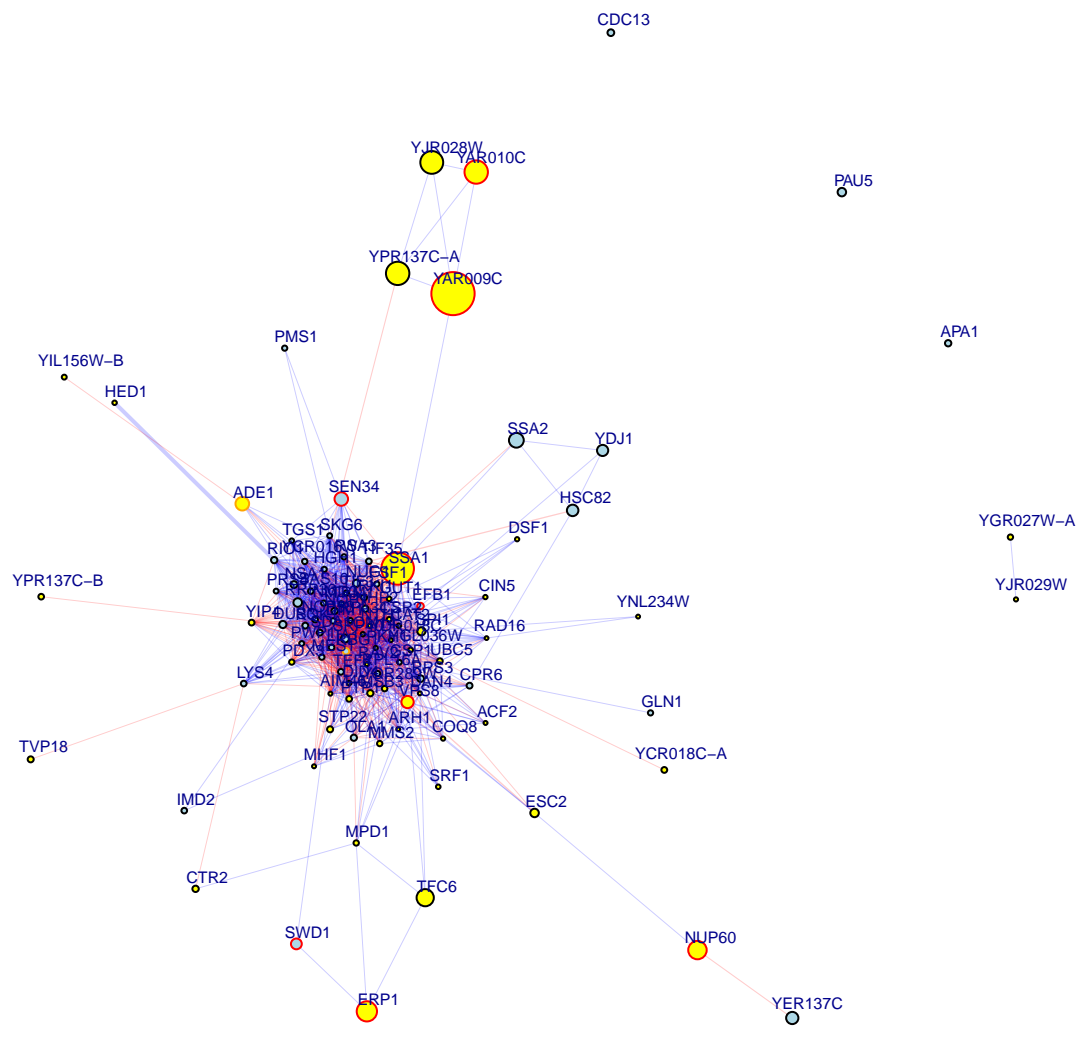

chr1:189123\_C/T top 16 up genes

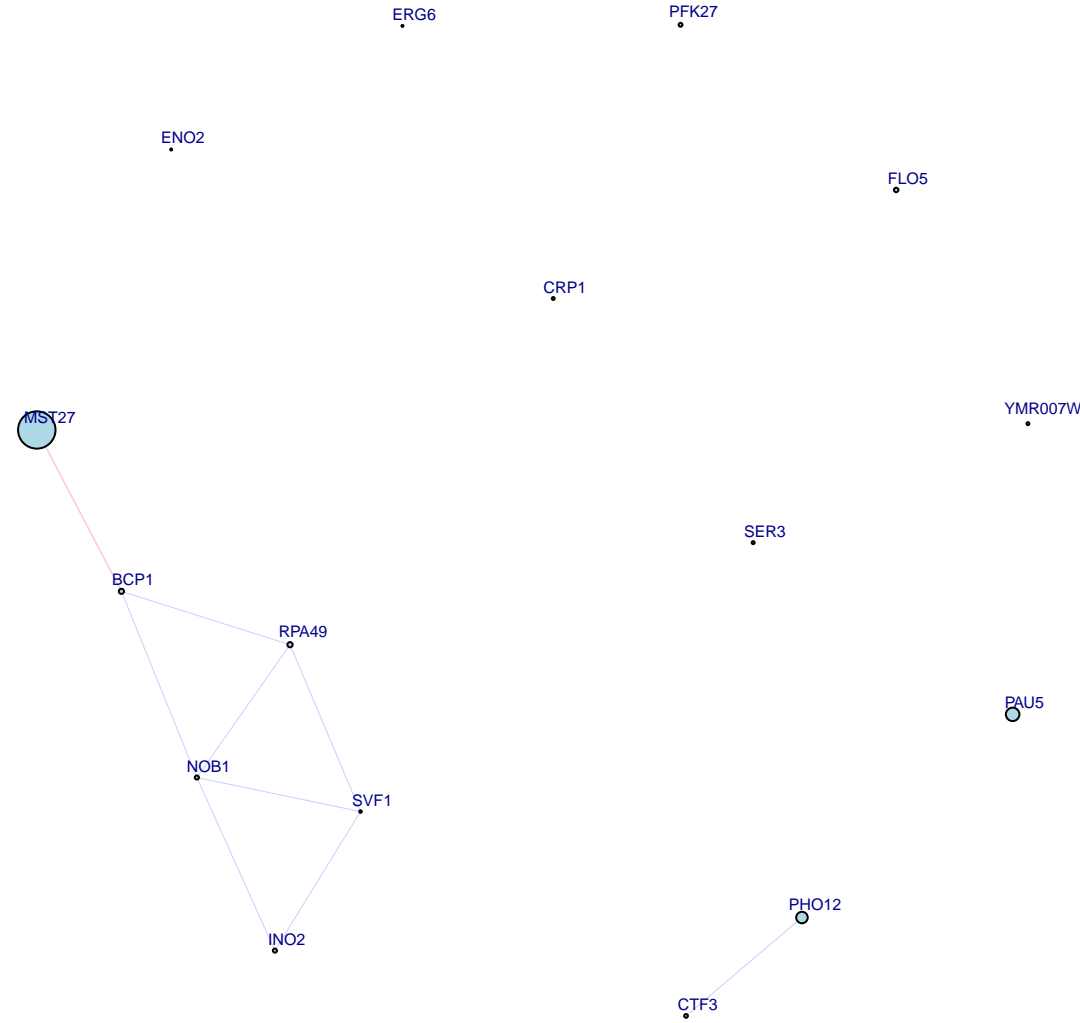

chr1:189123\_C/T top 28 down genes

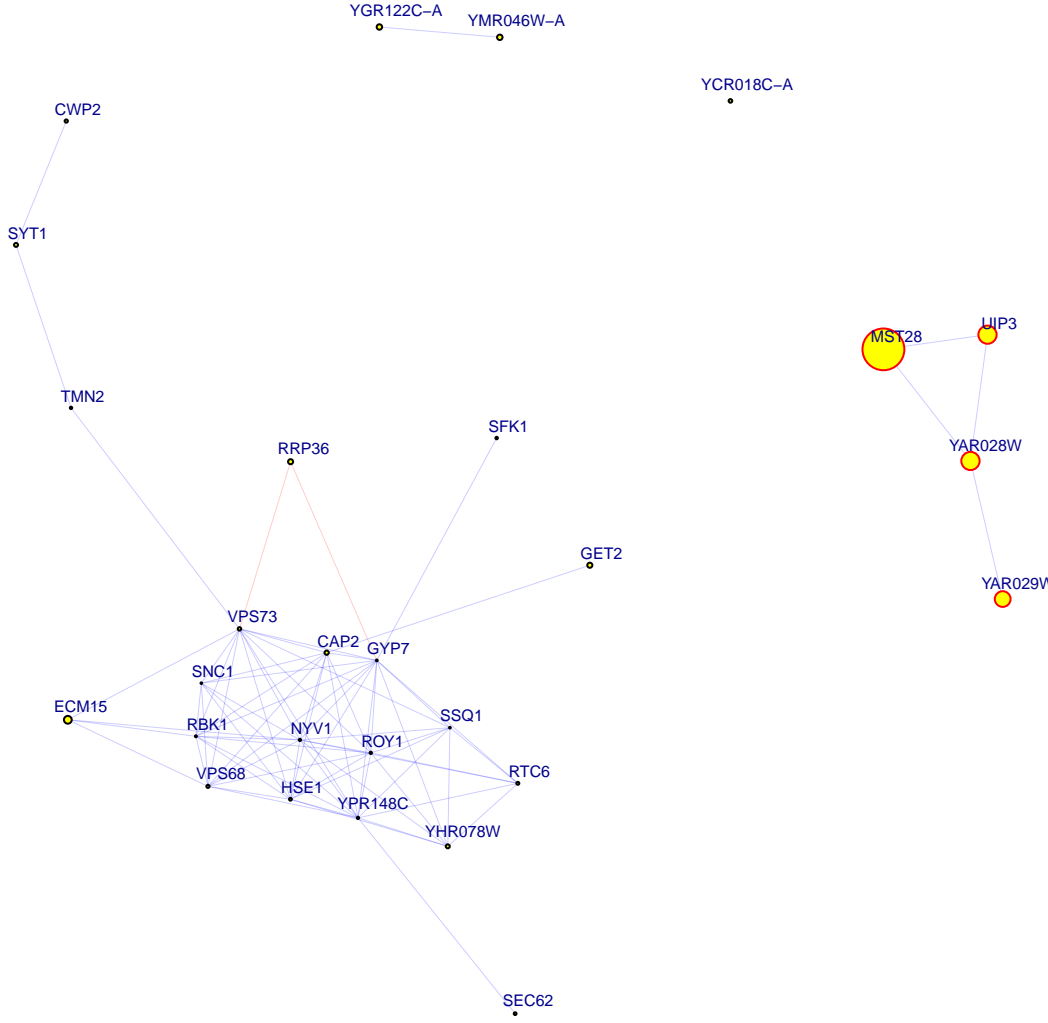

chr1:189123\_C/T top 44 up and down genes

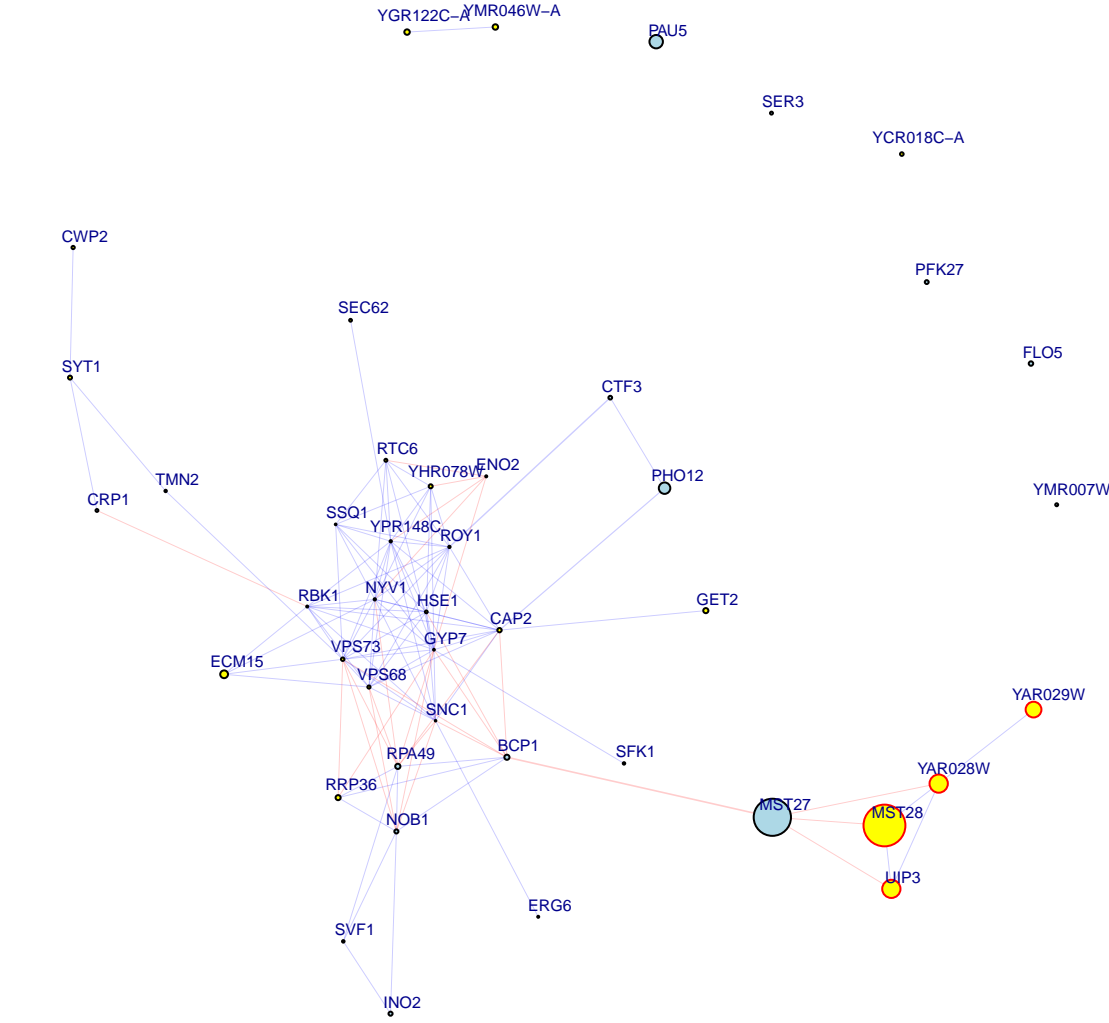

chrII:13061\_G/T top 18 up genes

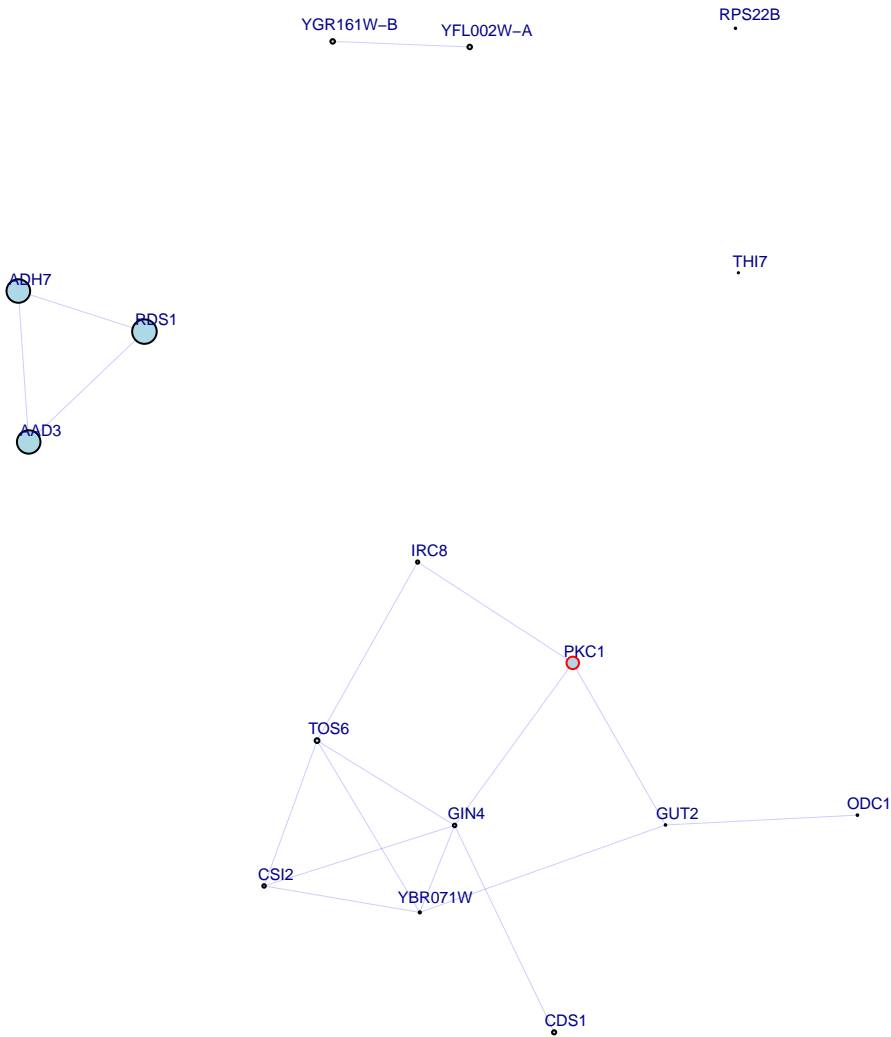

chrII:13061\_G/T top 15 down genes

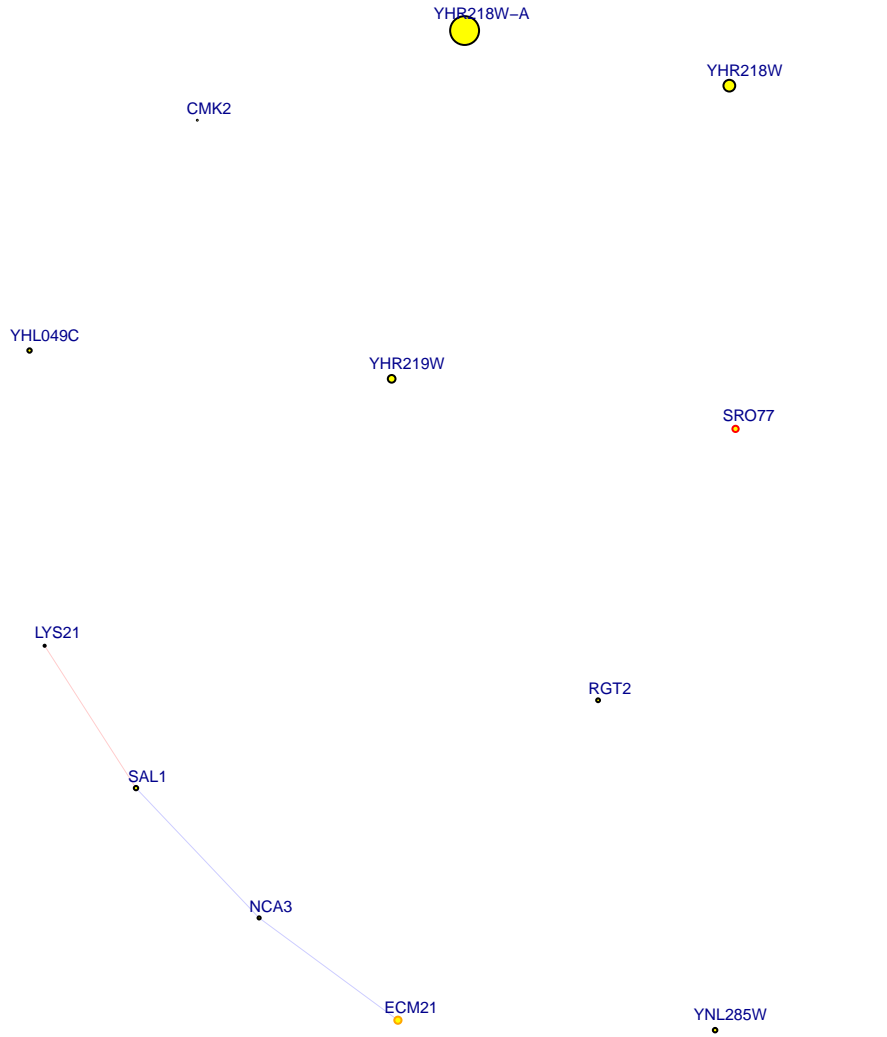

chrII:13061\_G/T top 33 up and down genes

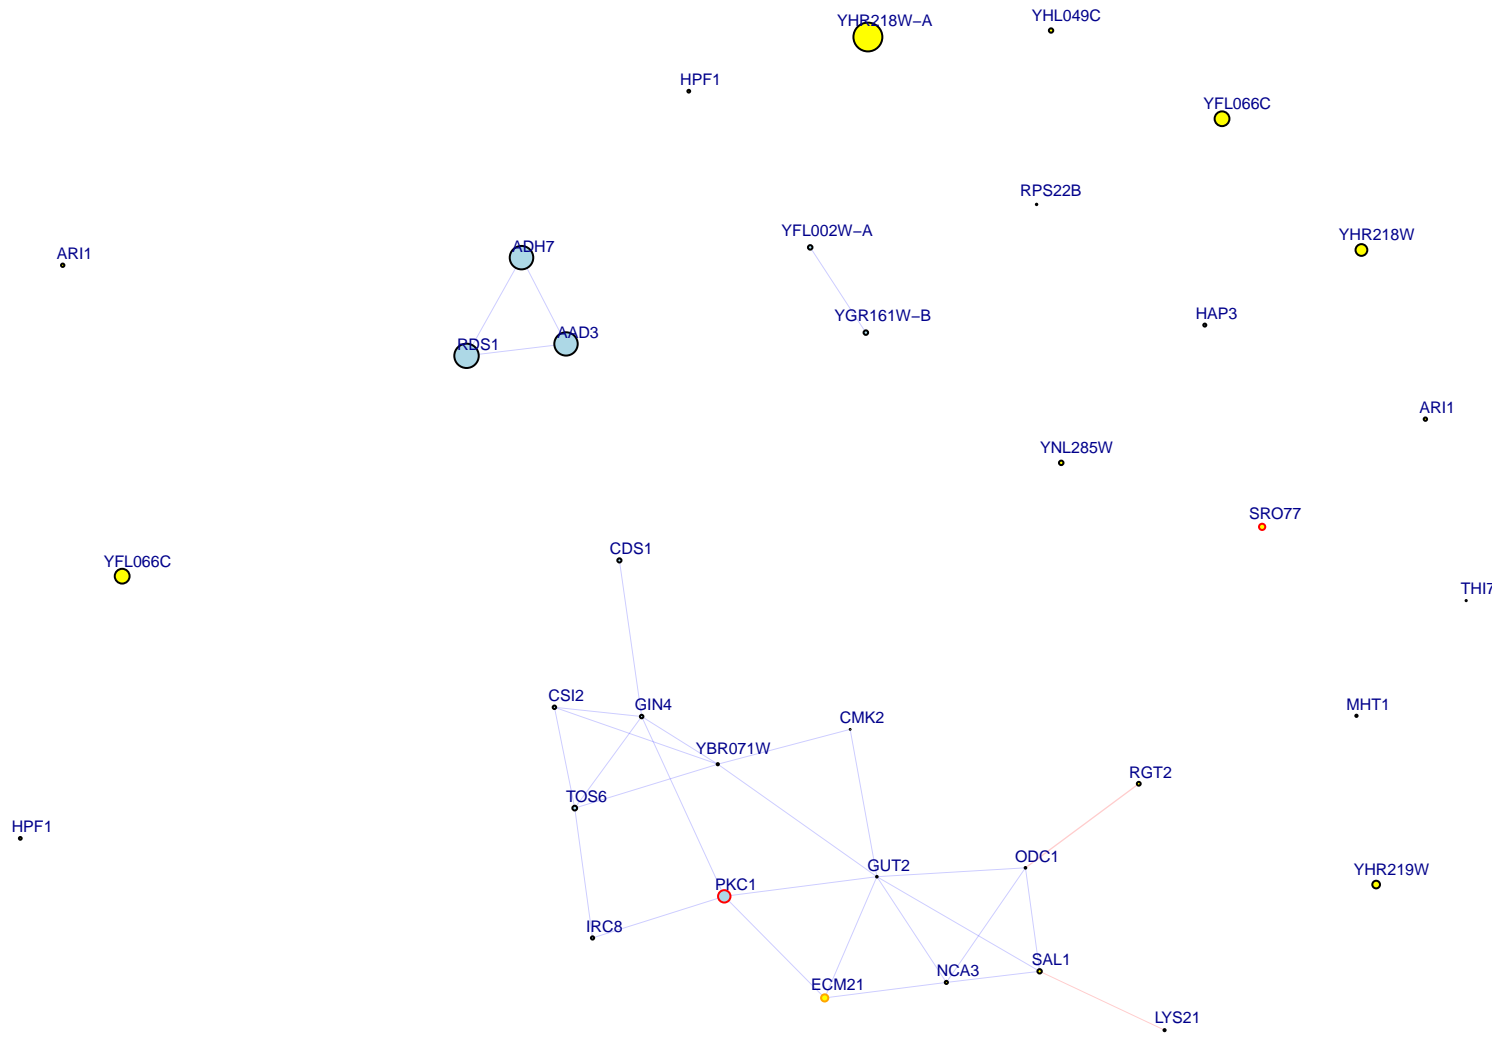

chrII:123764\_G/A top 50 up genes

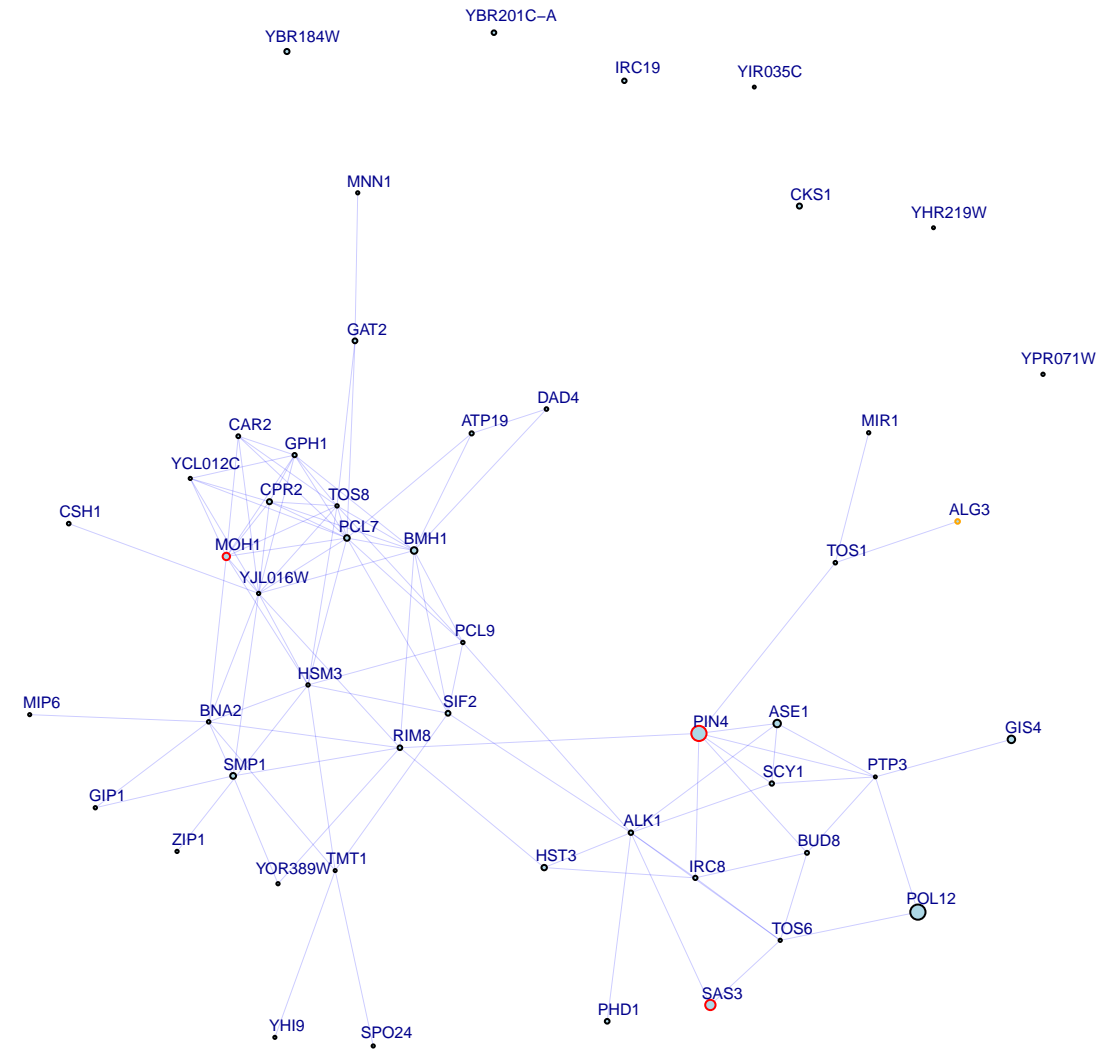

chrII:123764\_G/A top 50 down genes

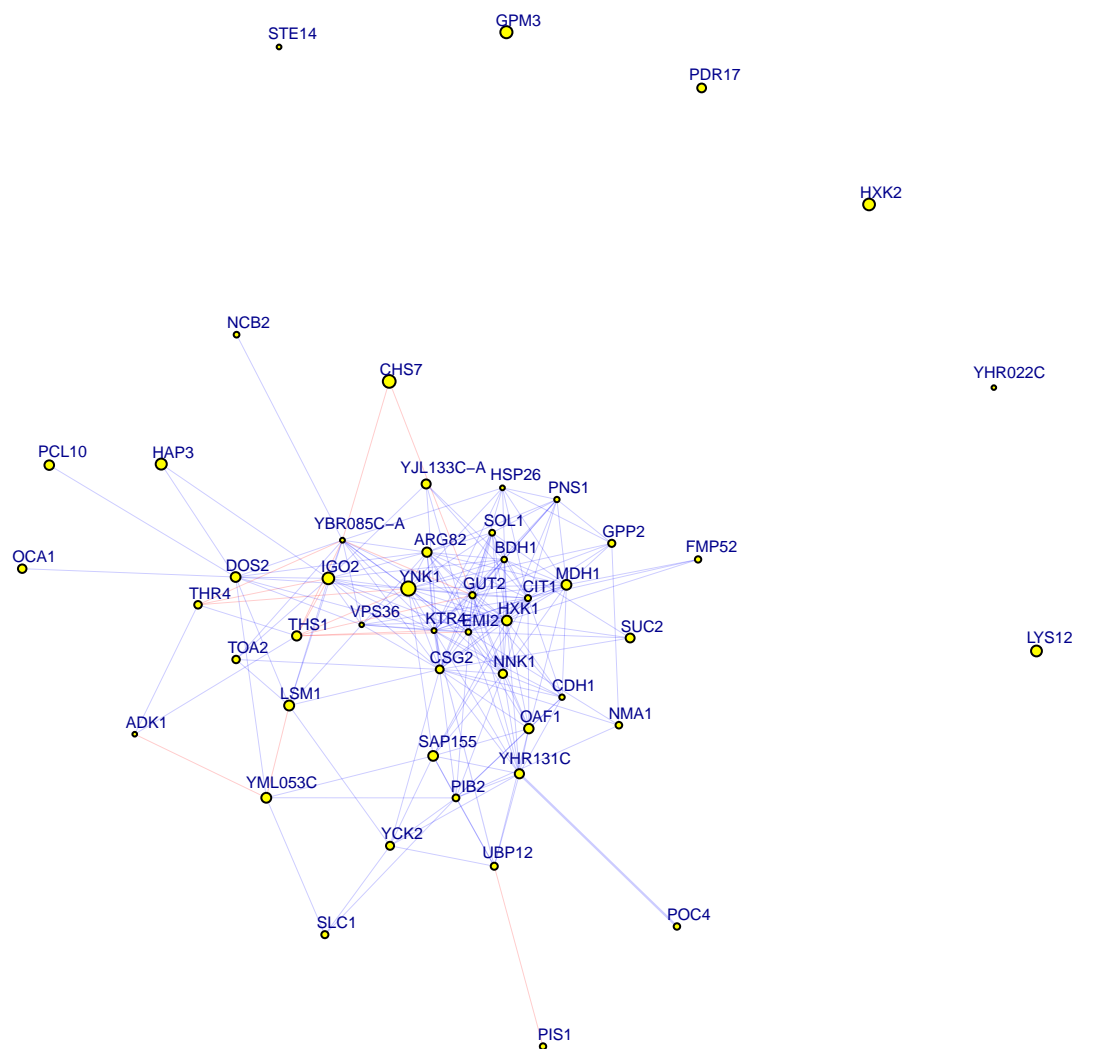

chrII:123764\_G/A top 100 up and down genes

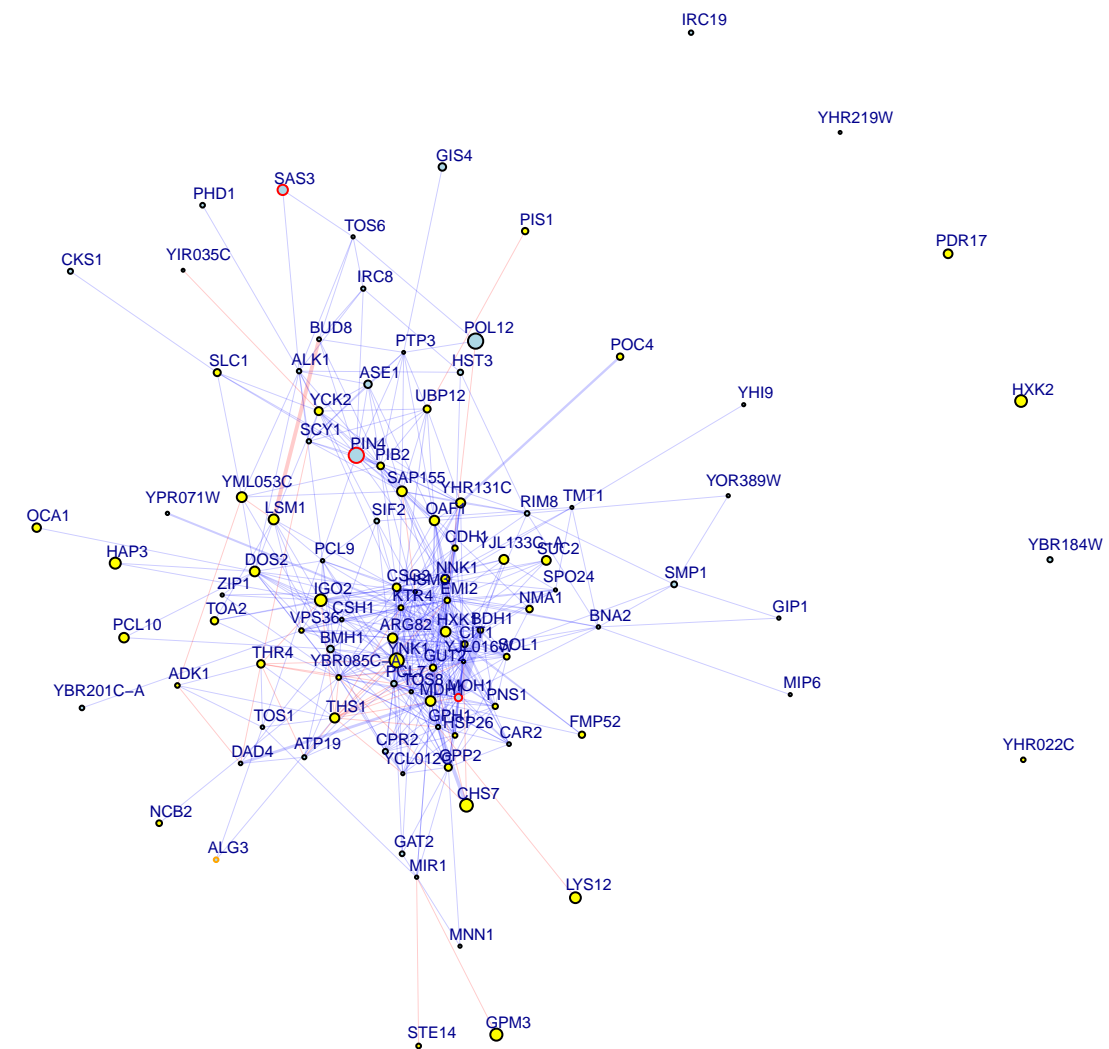

chrII:195177\_T/A top 50 up genes

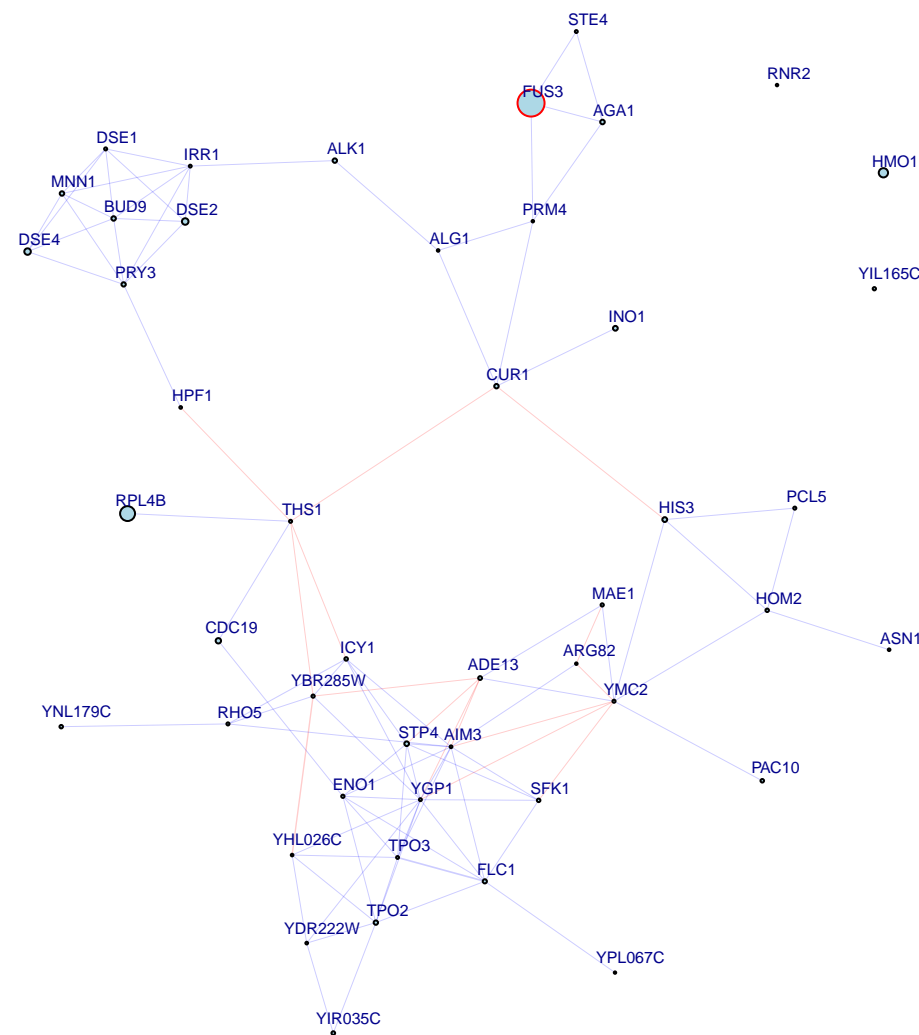

chrII:195177\_T/A top 50 down genes

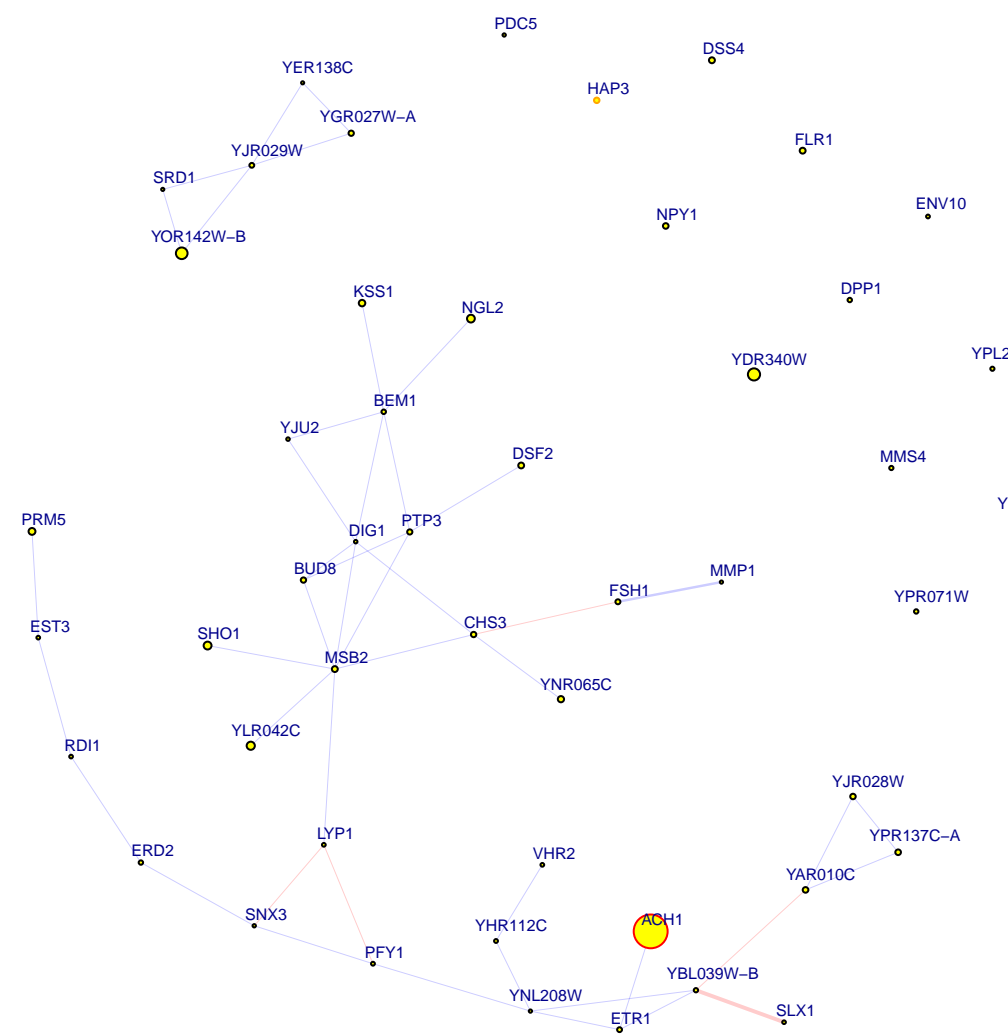

chrII:195177\_T/A top 100 up and down genes

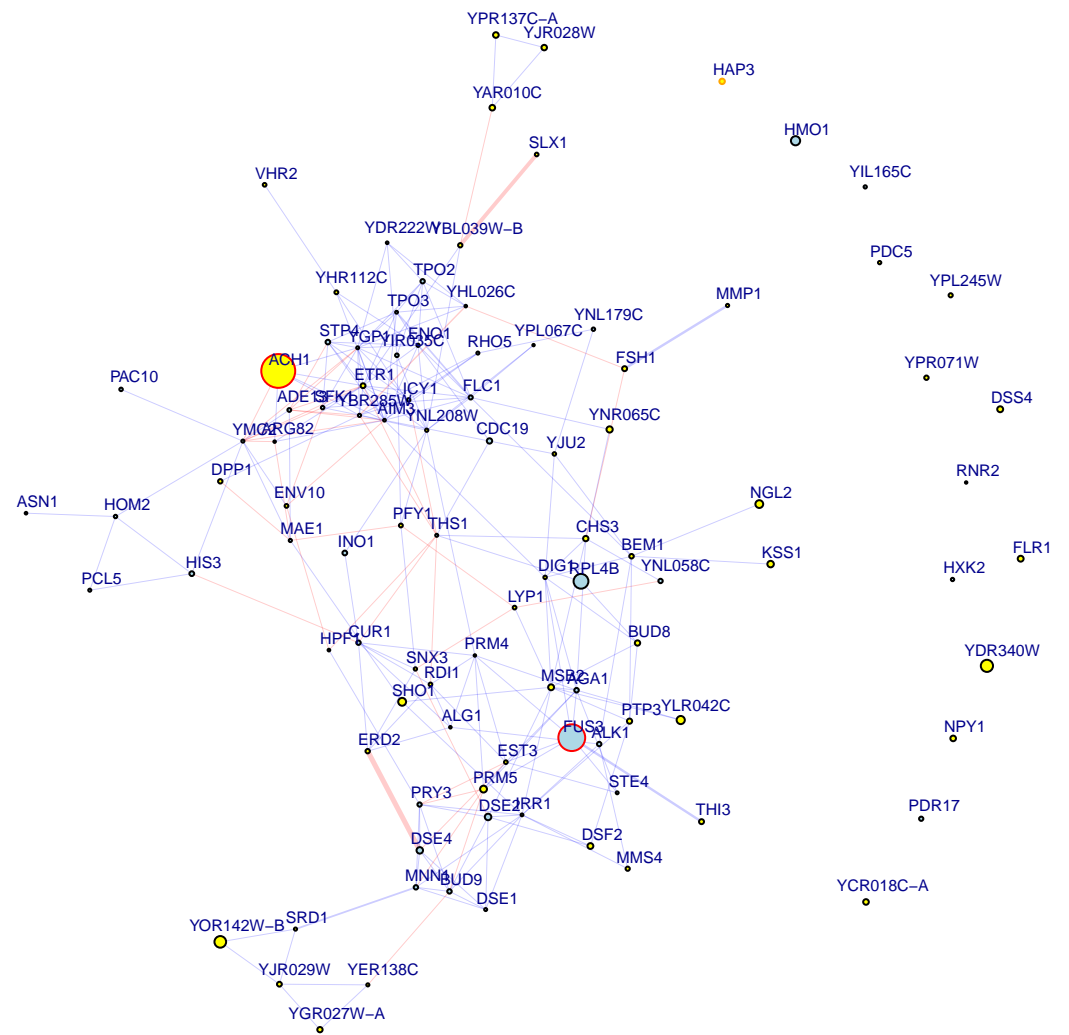

chrII:370967\_C/T top 50 up genes

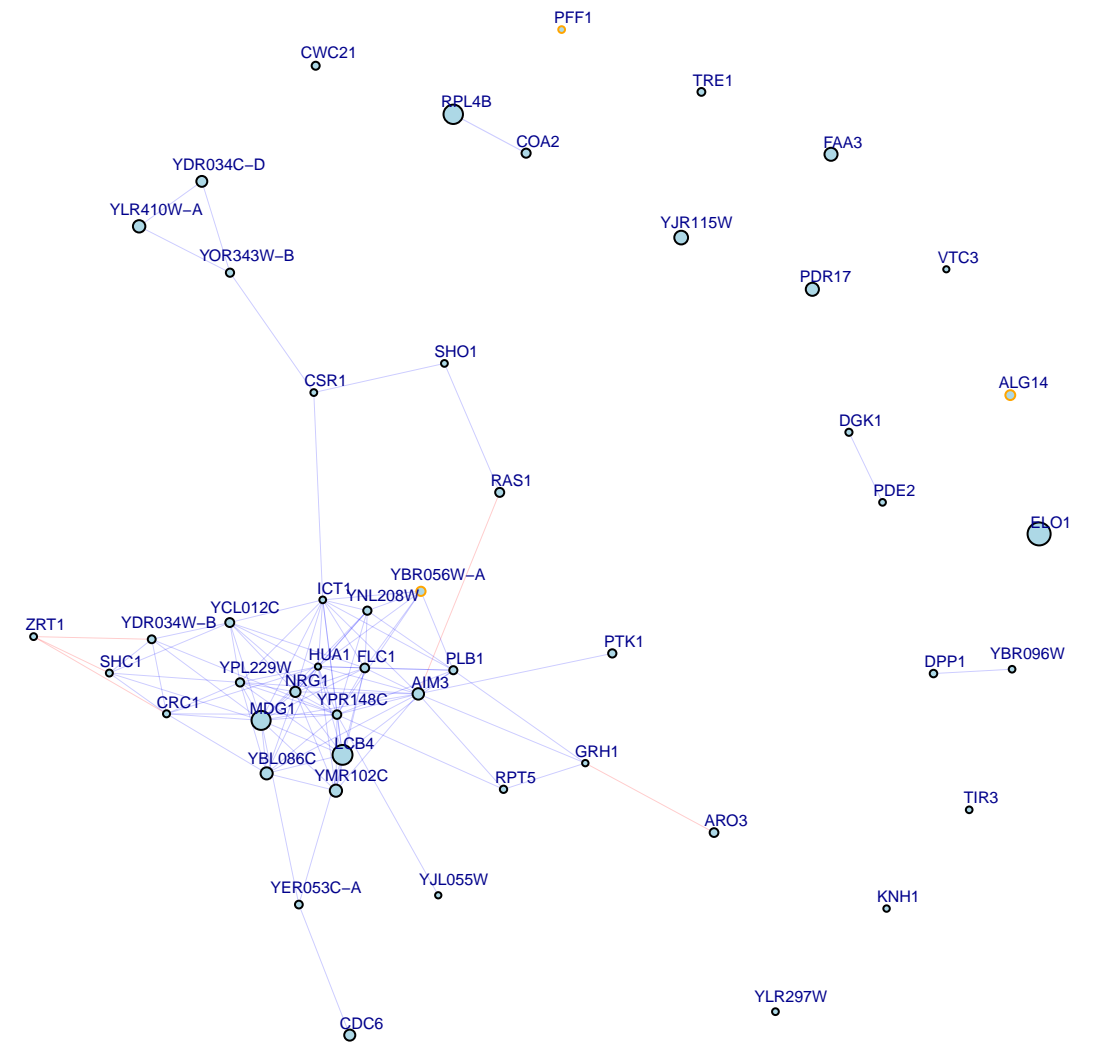

chrII:370967\_C/T top 36 down genes

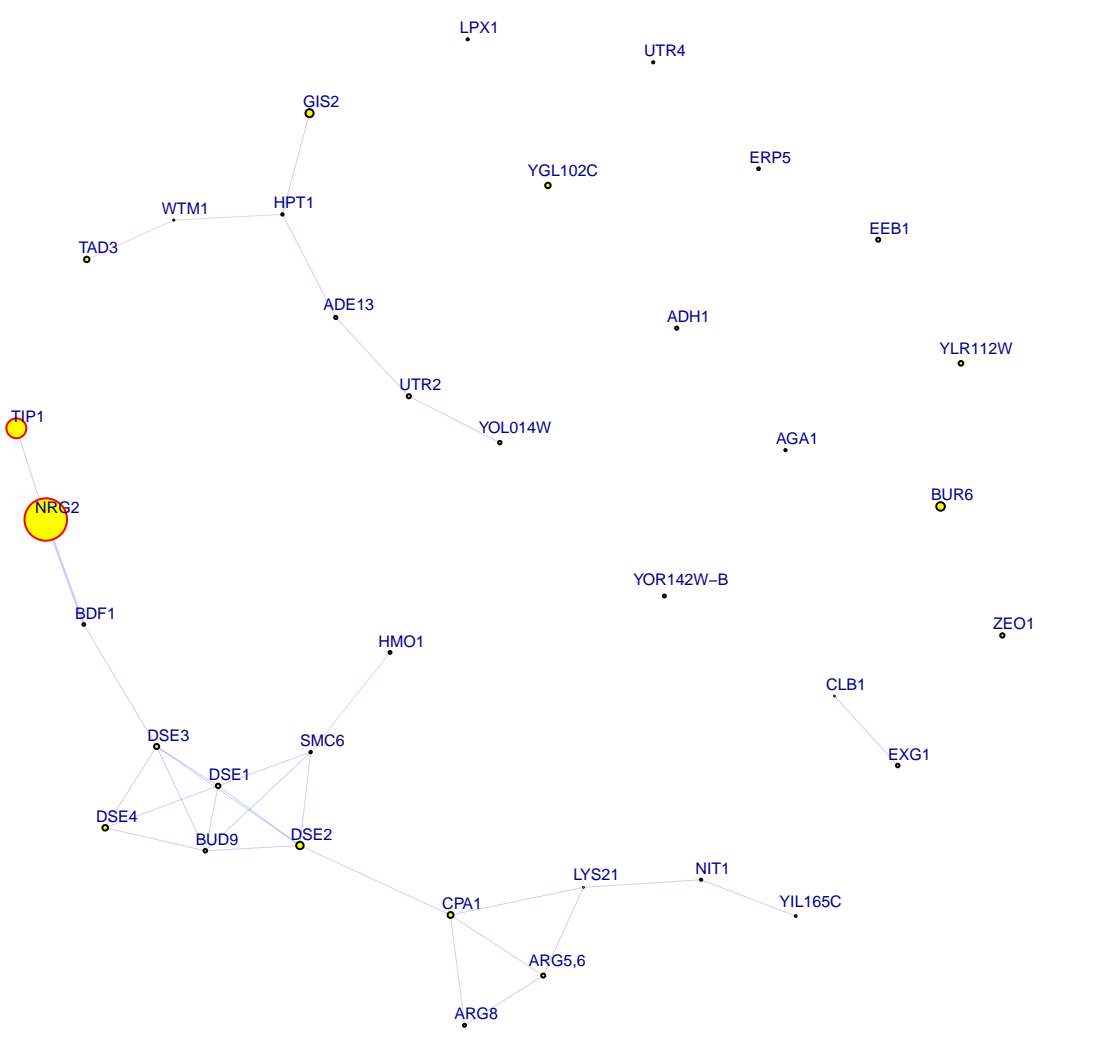

chrII:370967\_C/T top 86 up and down genes

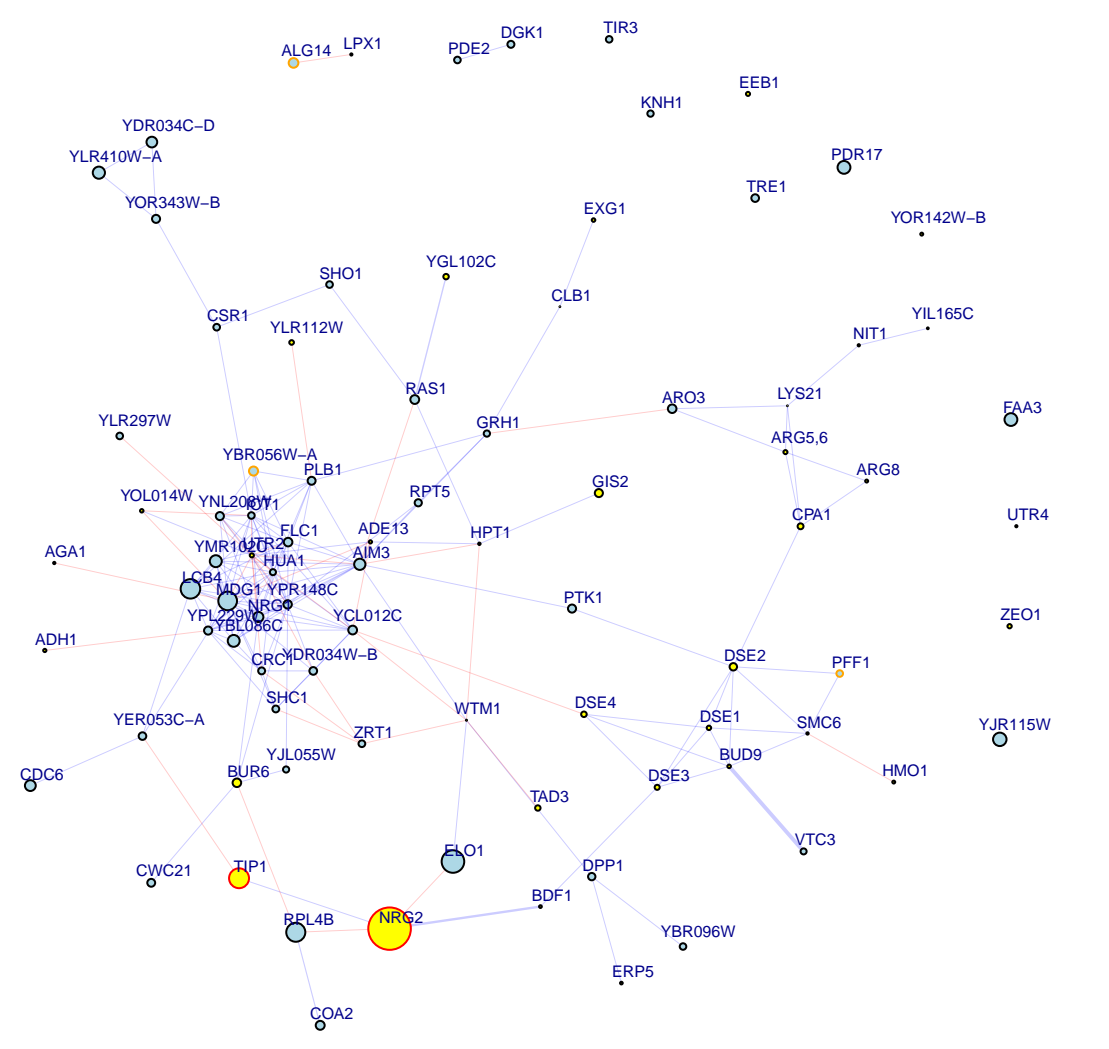



chrII:464478\_G/A top 50 up genes

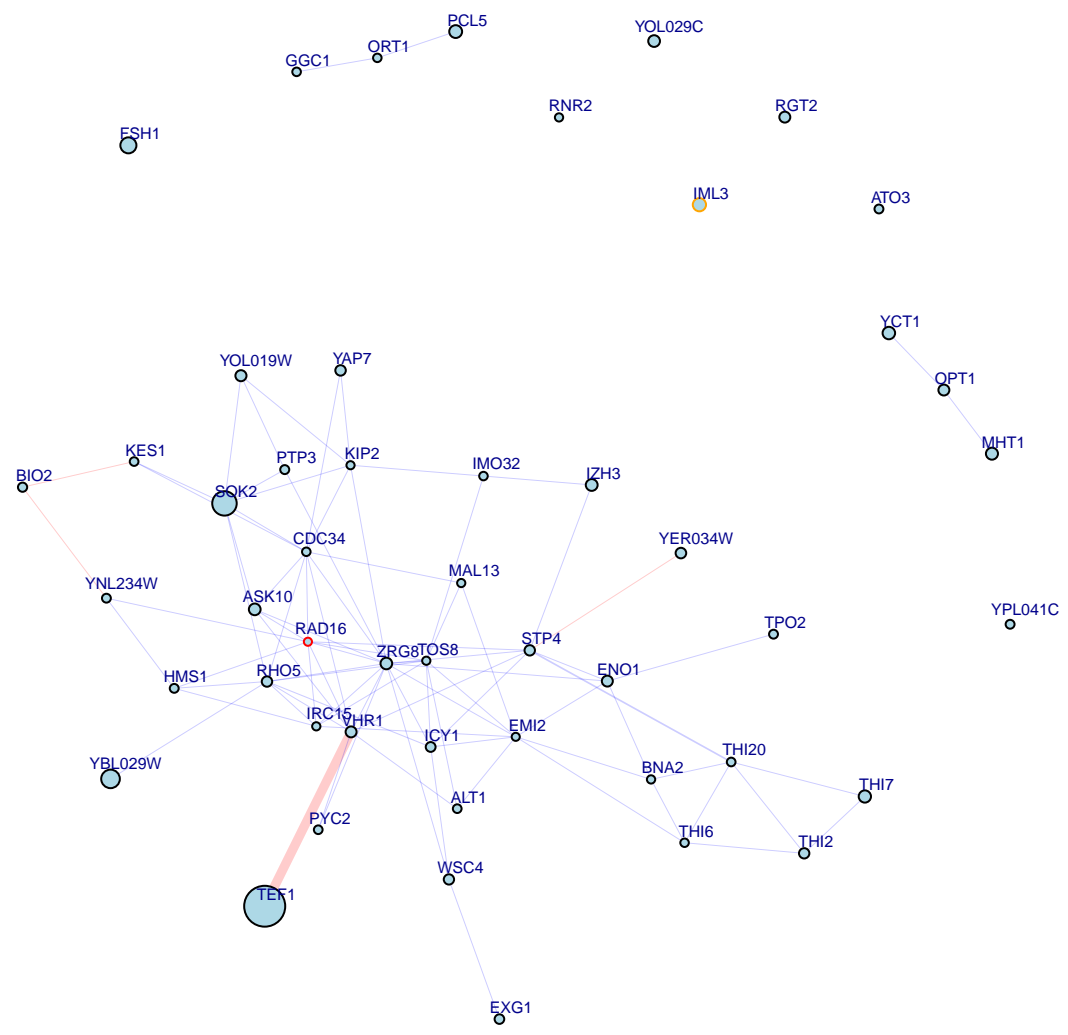

chrII:464478\_G/A top 50 down genes

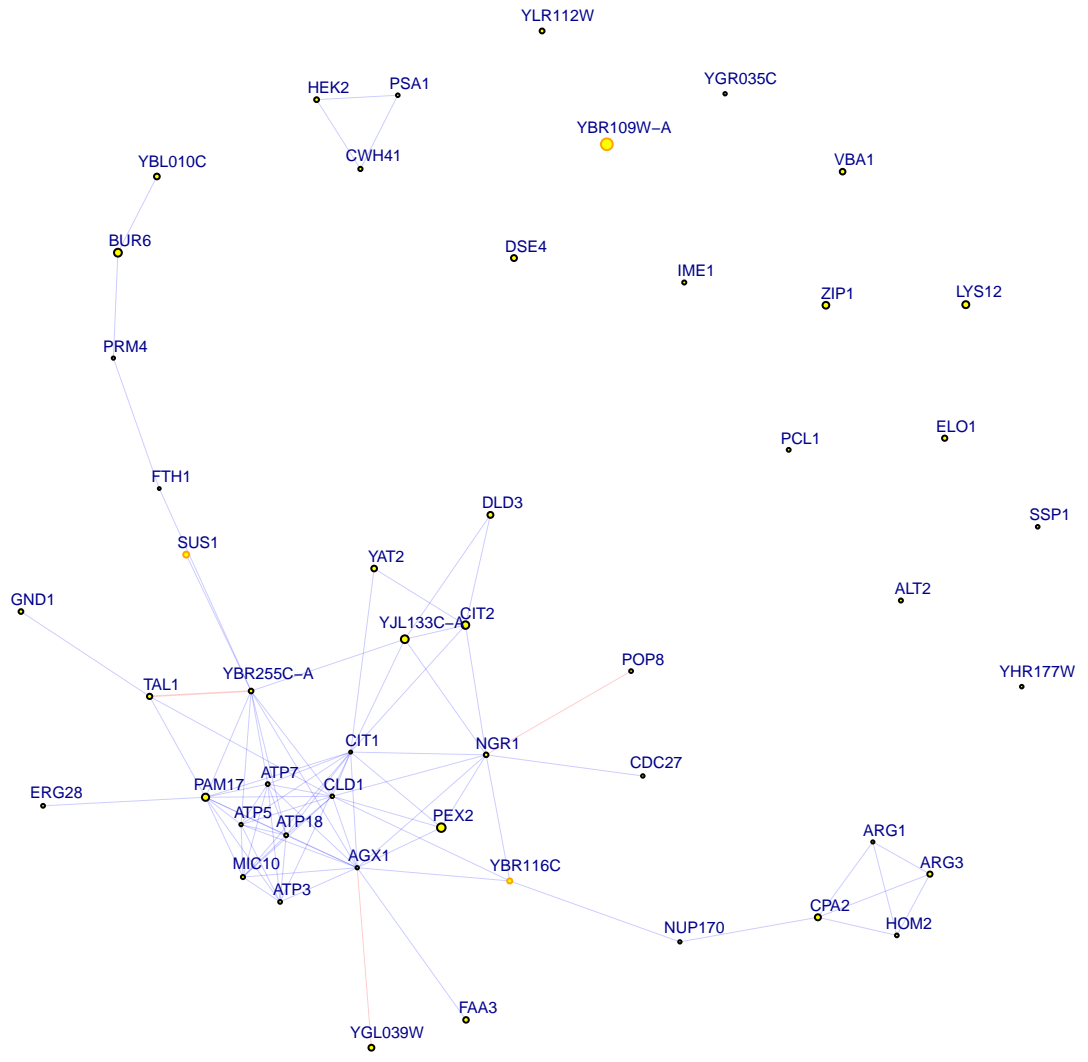

chrII:464478\_G/A top 100 up and down genes

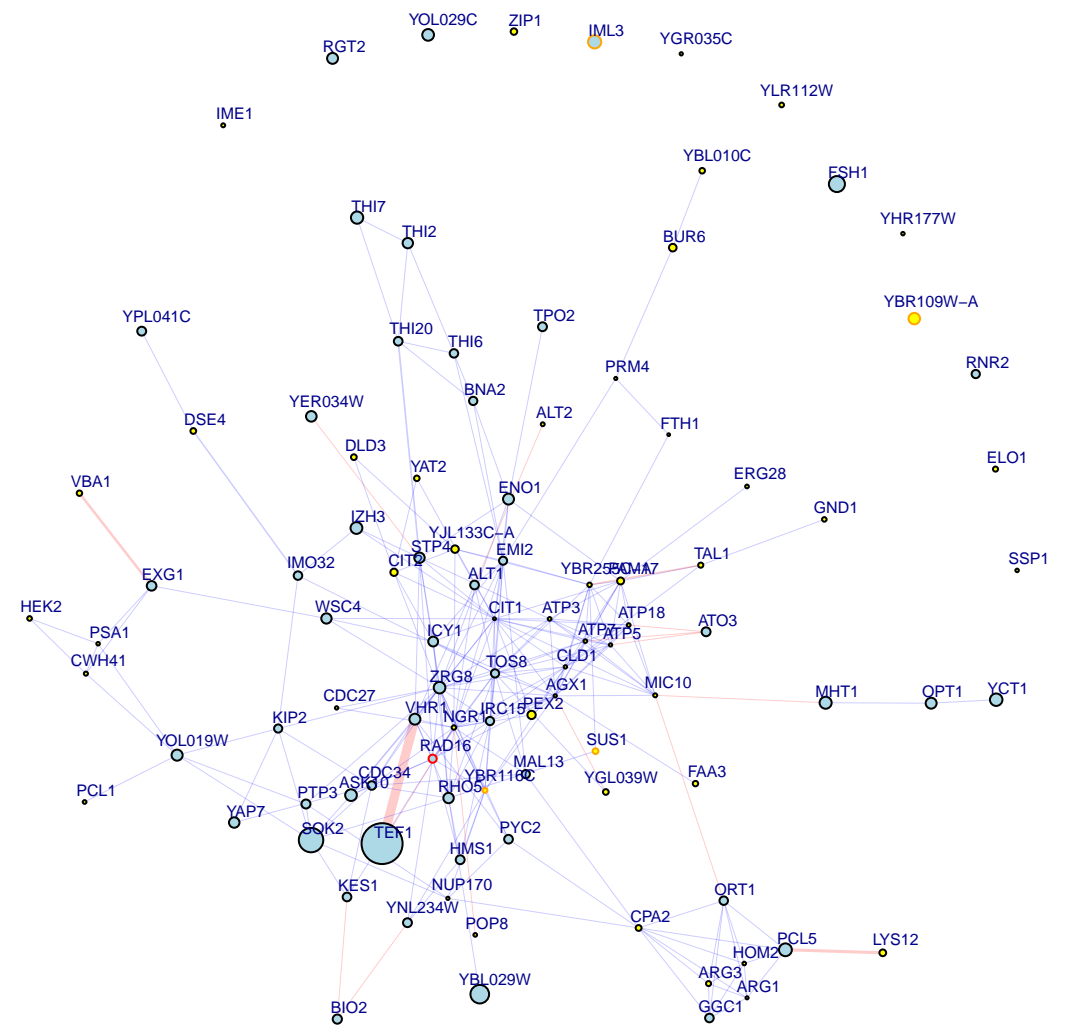

chrII:541139\_G/A top 50 up genes

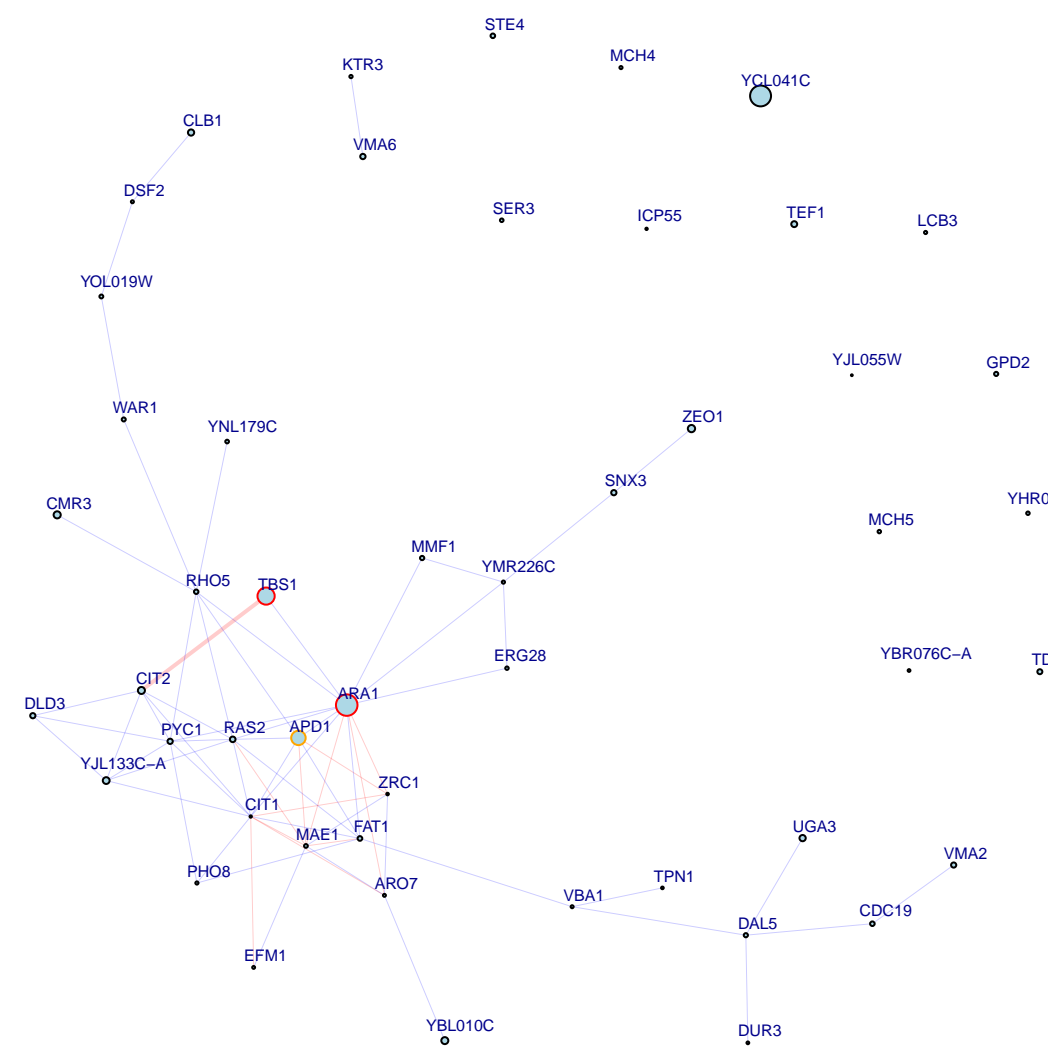

chrII:541139\_G/A top 50 down genes

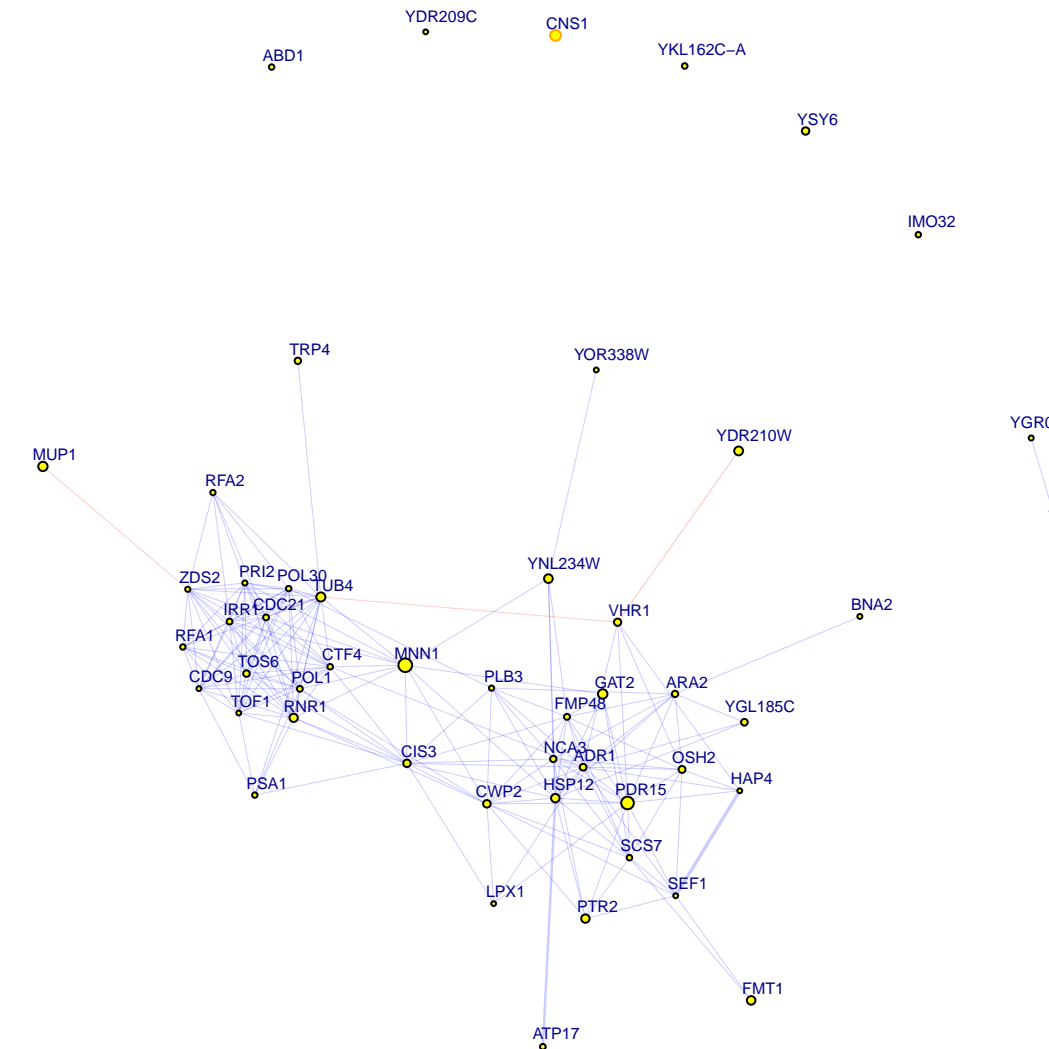

chrII:541139\_G/A top 100 up and down genes

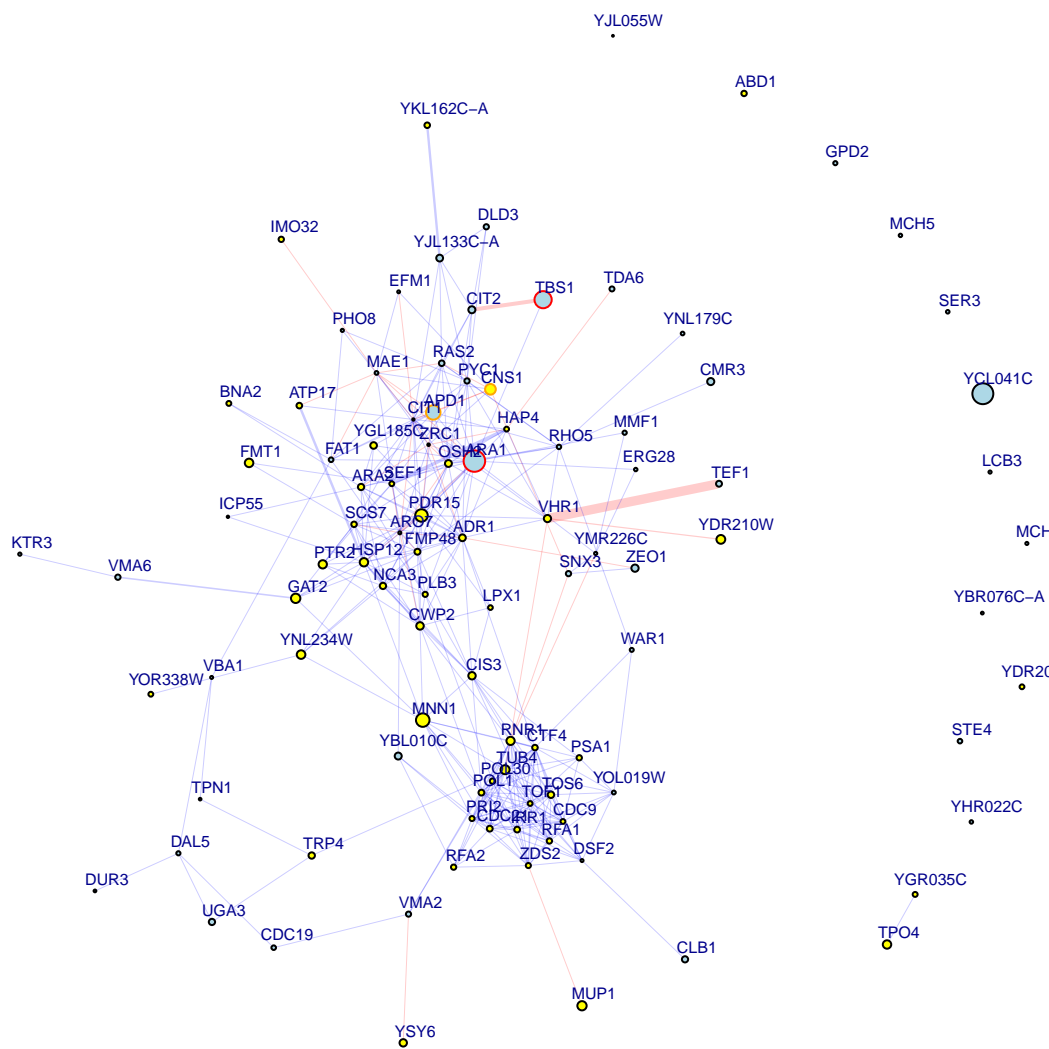

chrII:619028\_C/A top 50 up genes

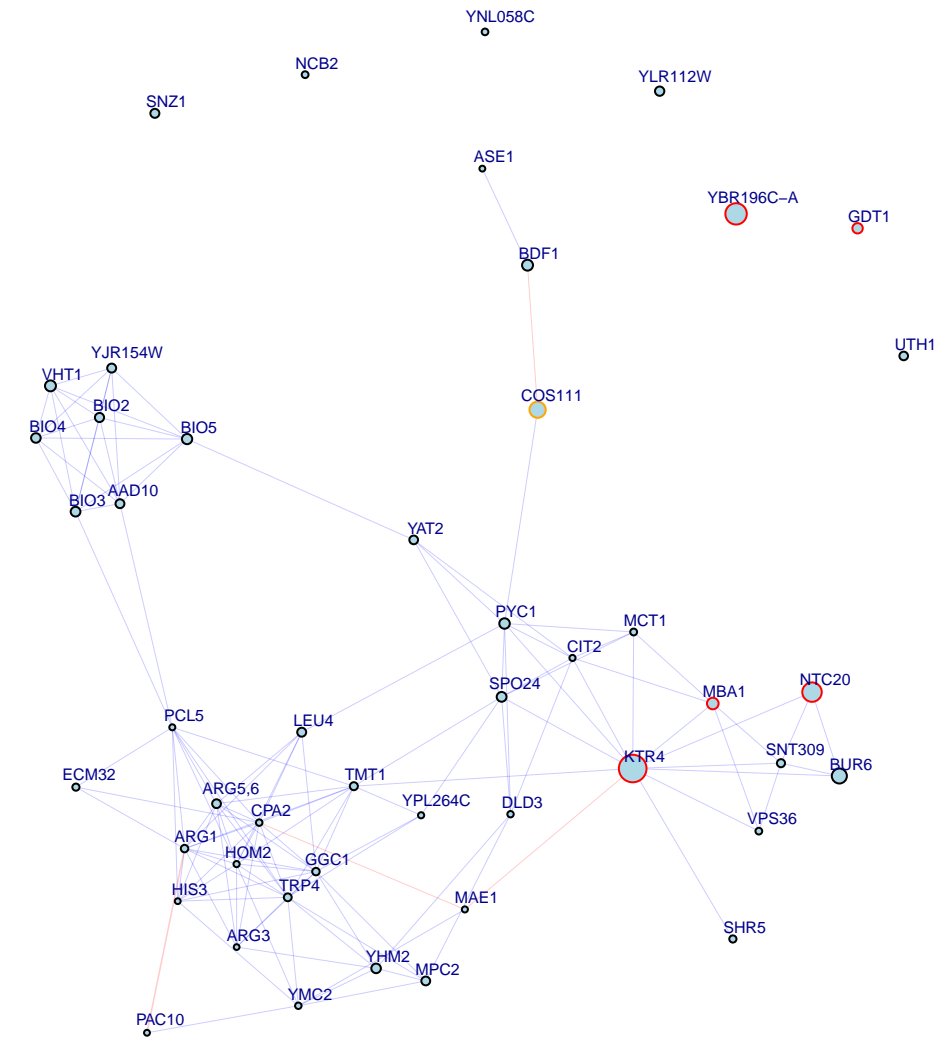

chrII:619028\_C/A top 50 down genes

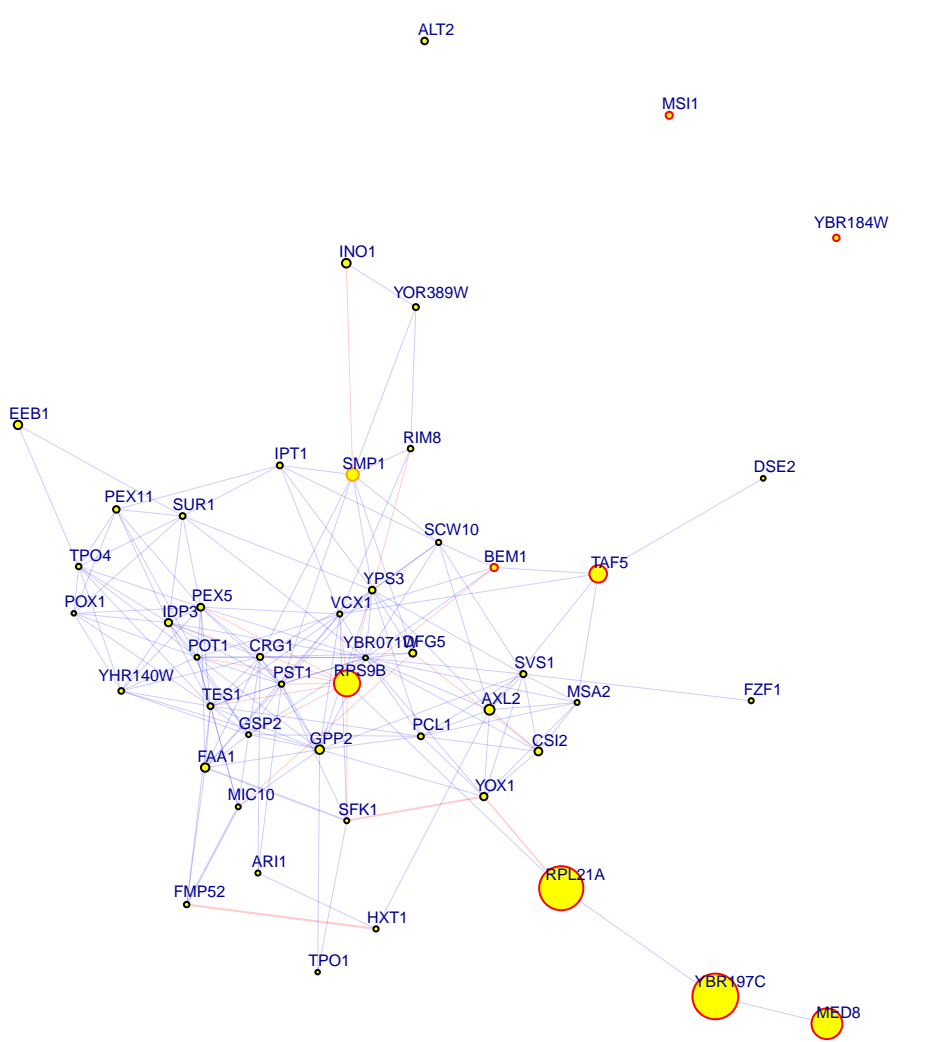

chrII:619028\_C/A top 100 up and down genes

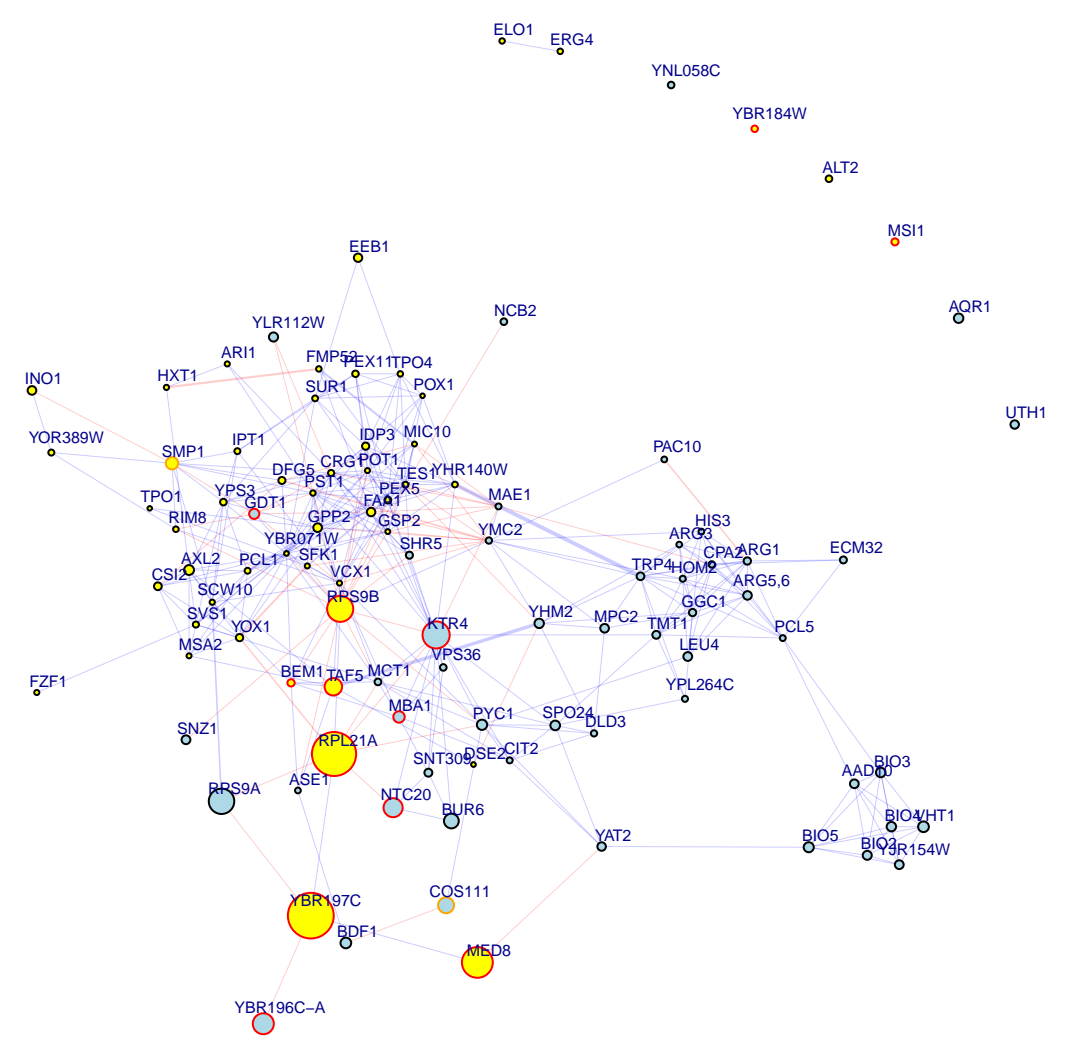



chrIII:166390\_G/C top 9 up genes

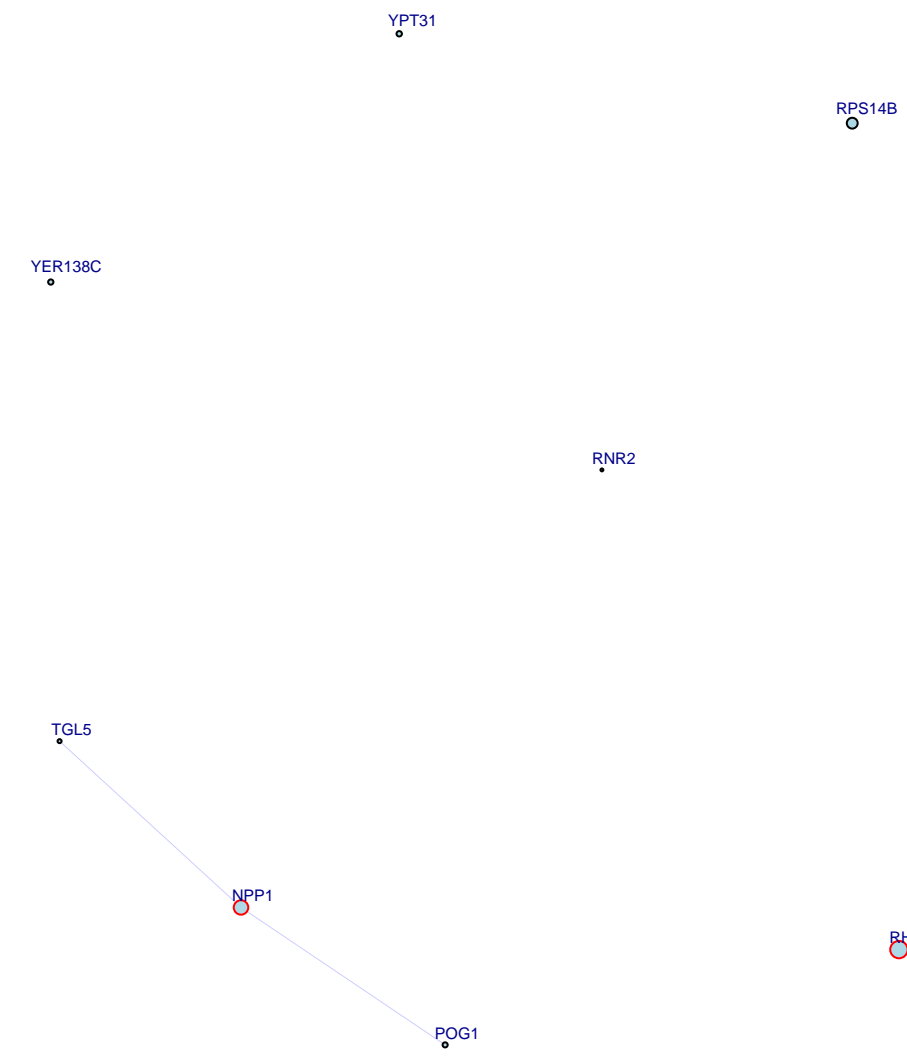

chrIII:166390\_G/C top 17 down genes

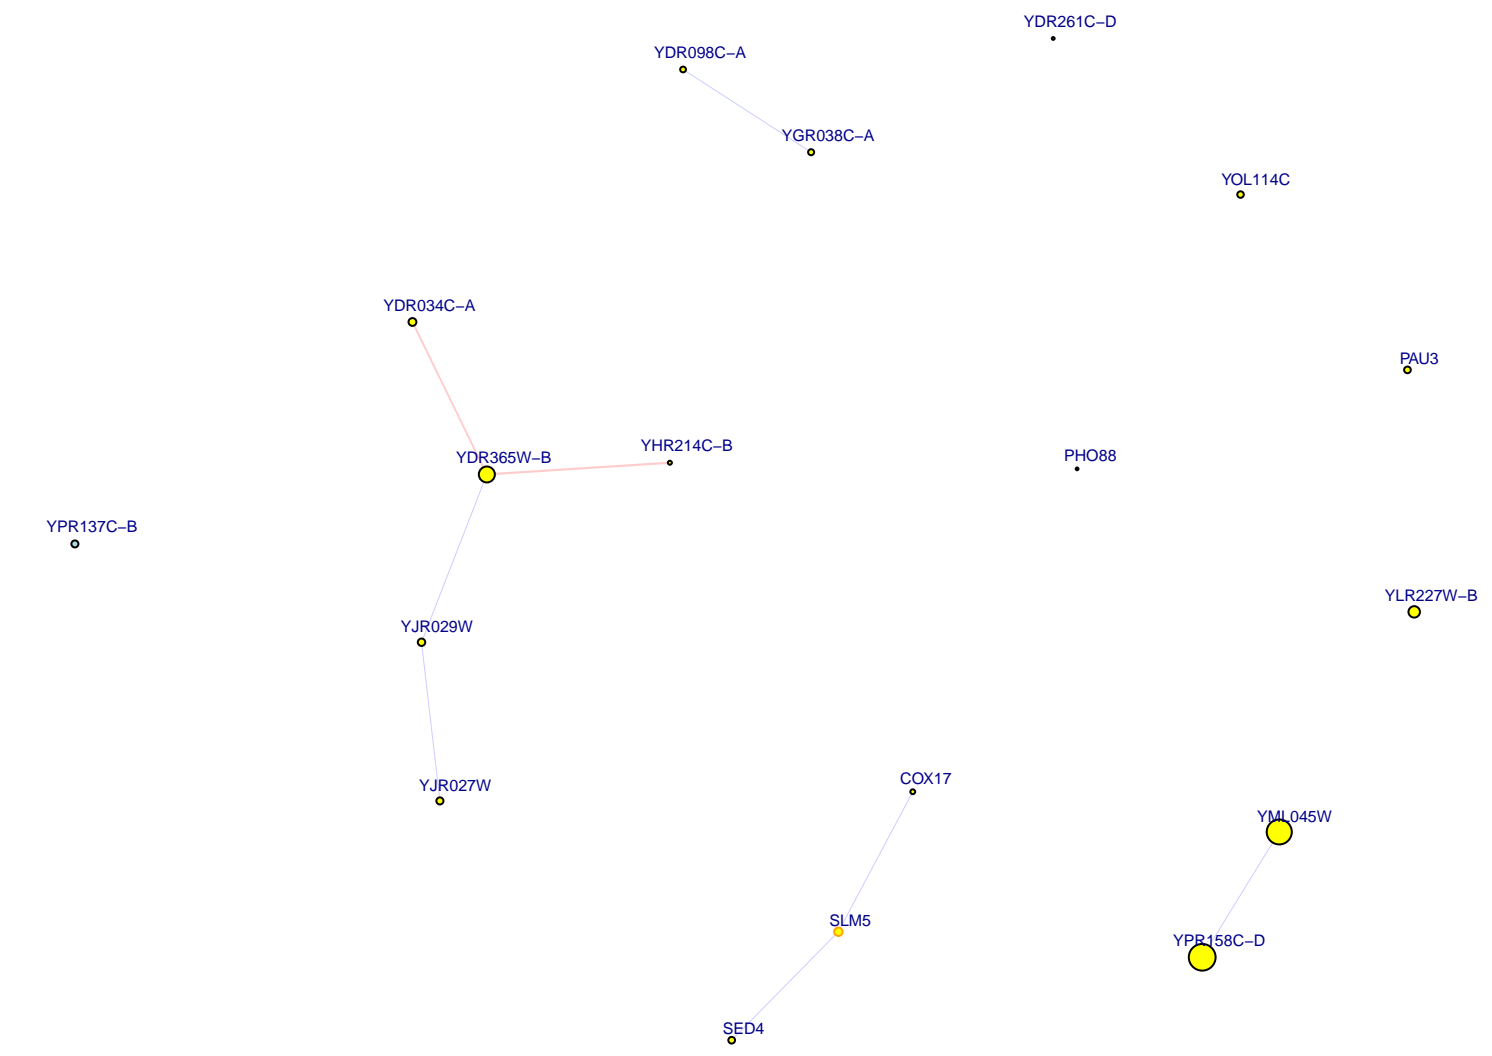

chrIII:166390\_G/C top 26 up and down genes

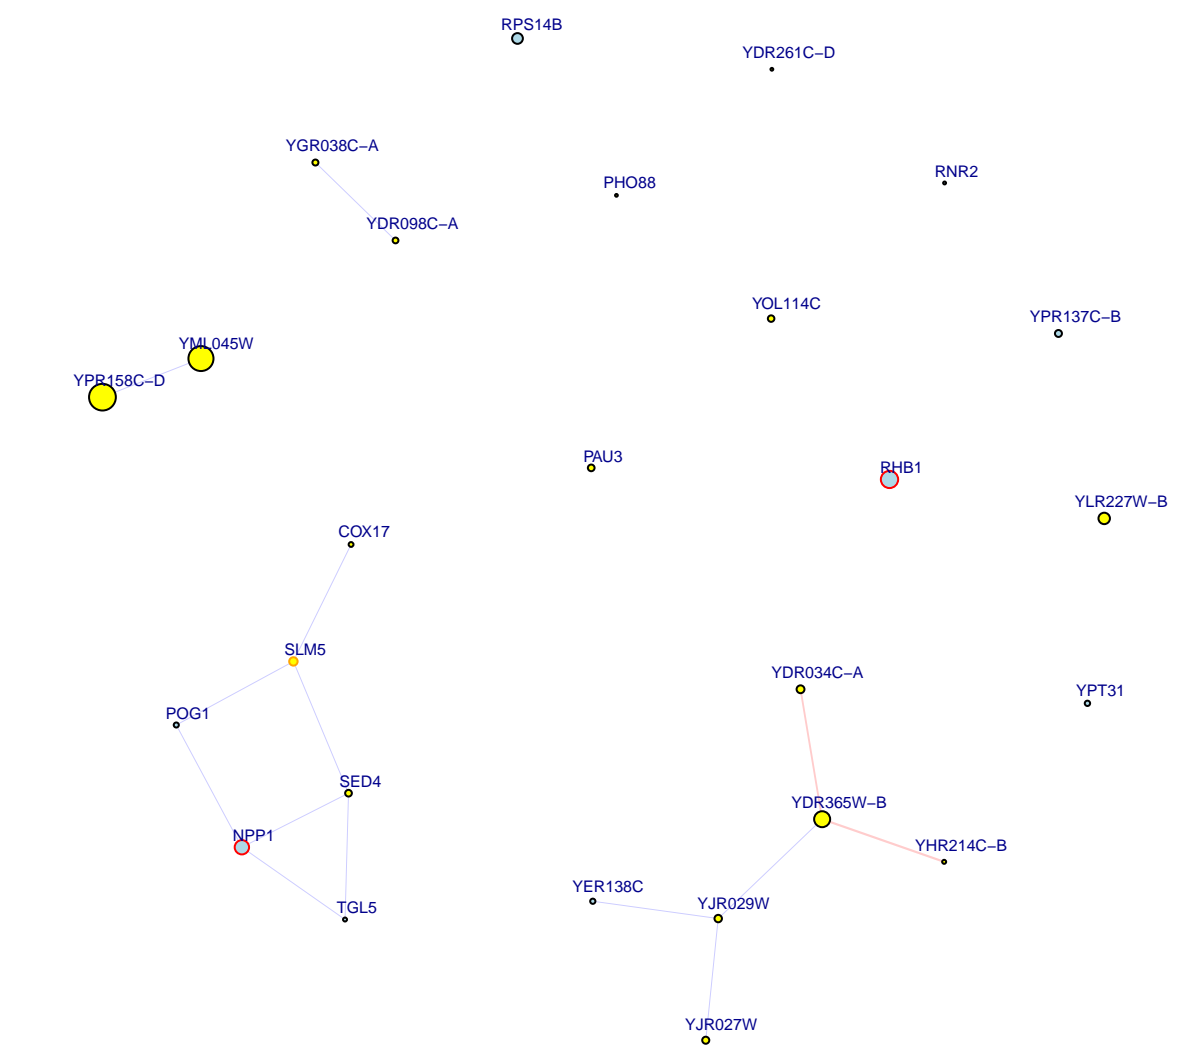

chrIII:201185\_C/A top 28 up genes

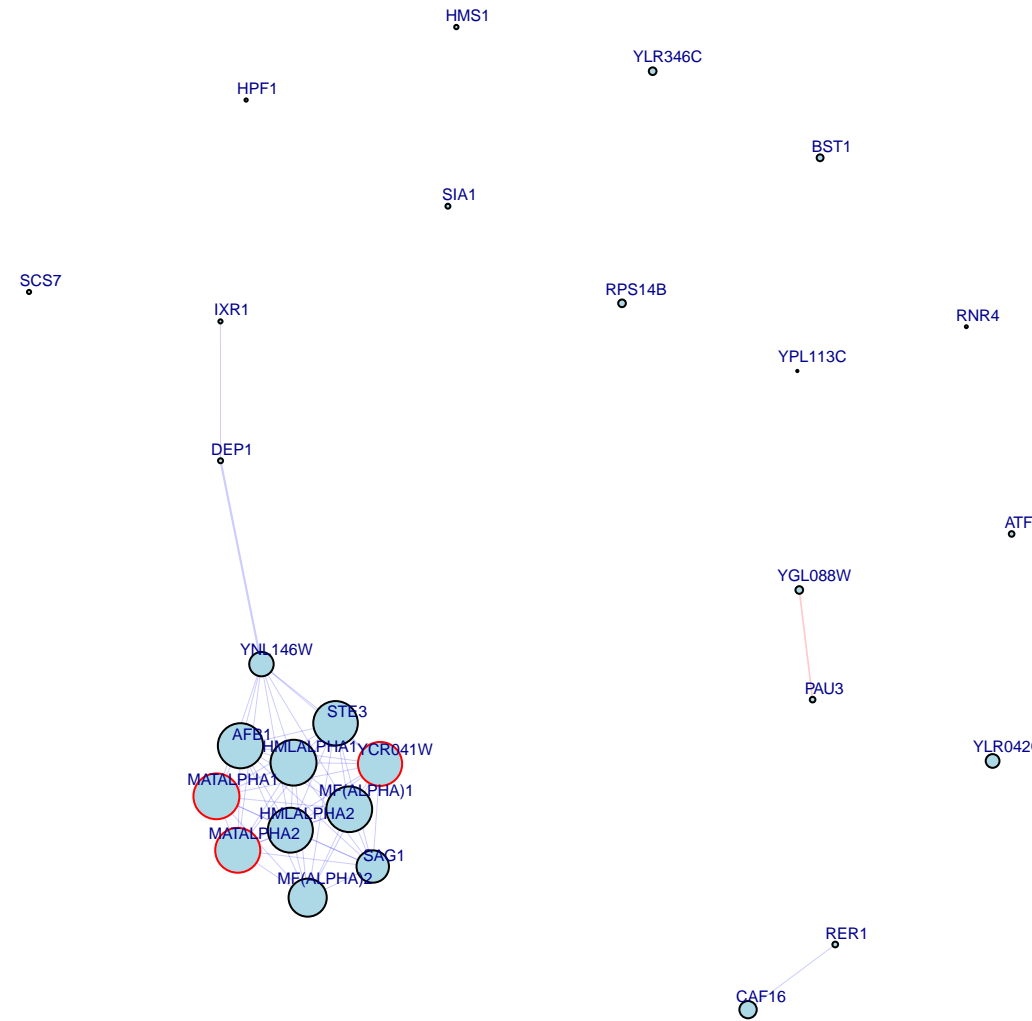

chrIII:201185\_C/A top 50 down genes

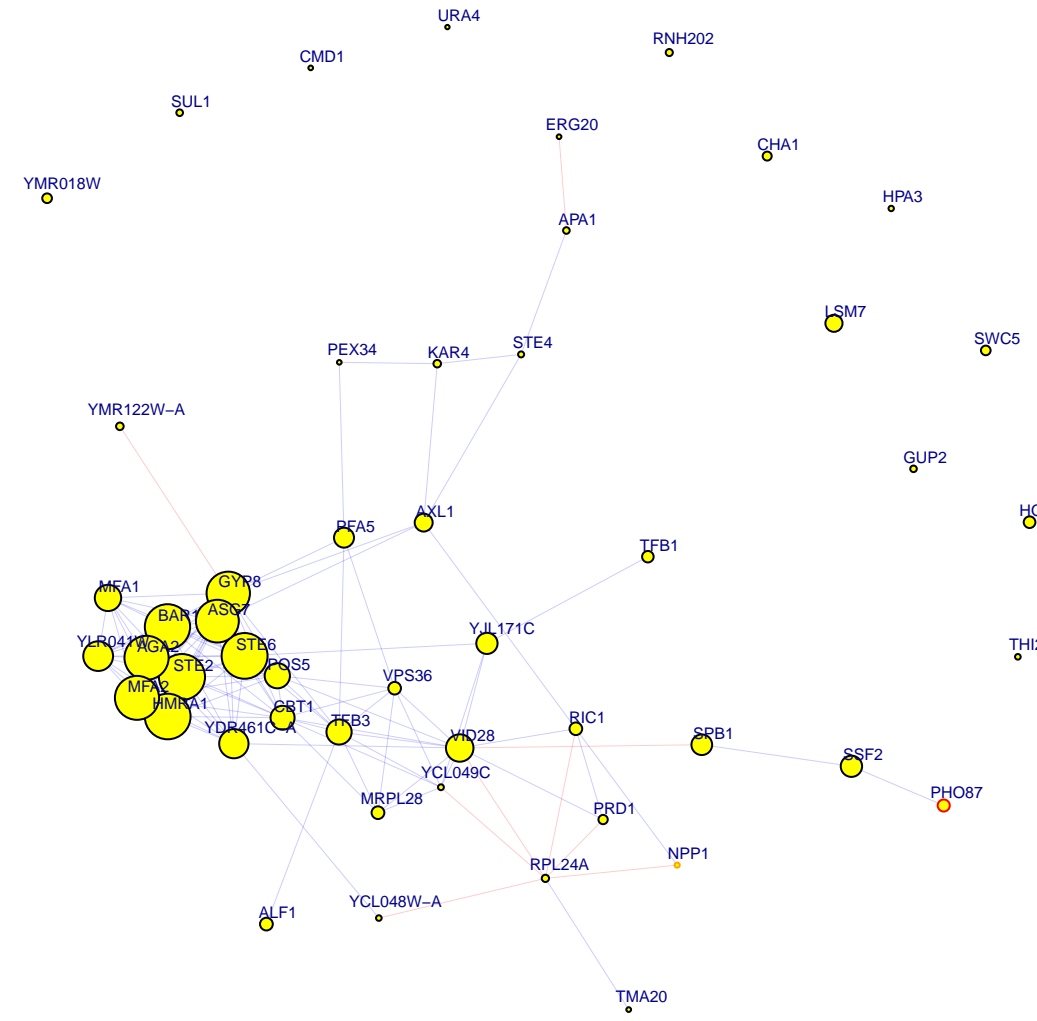

chrIII:201185\_C/A top 78 up and down genes

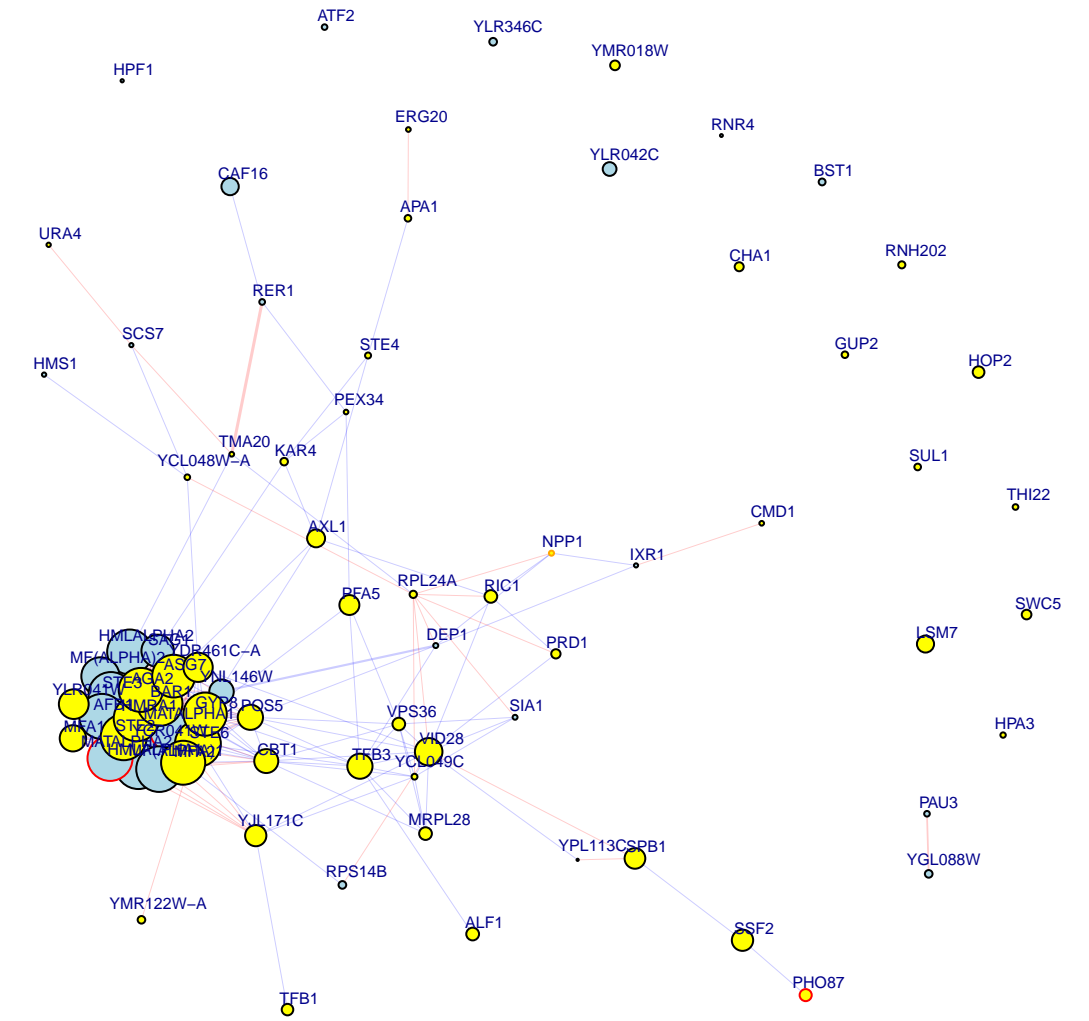

chrIII:262105\_C/T top 19 up genes

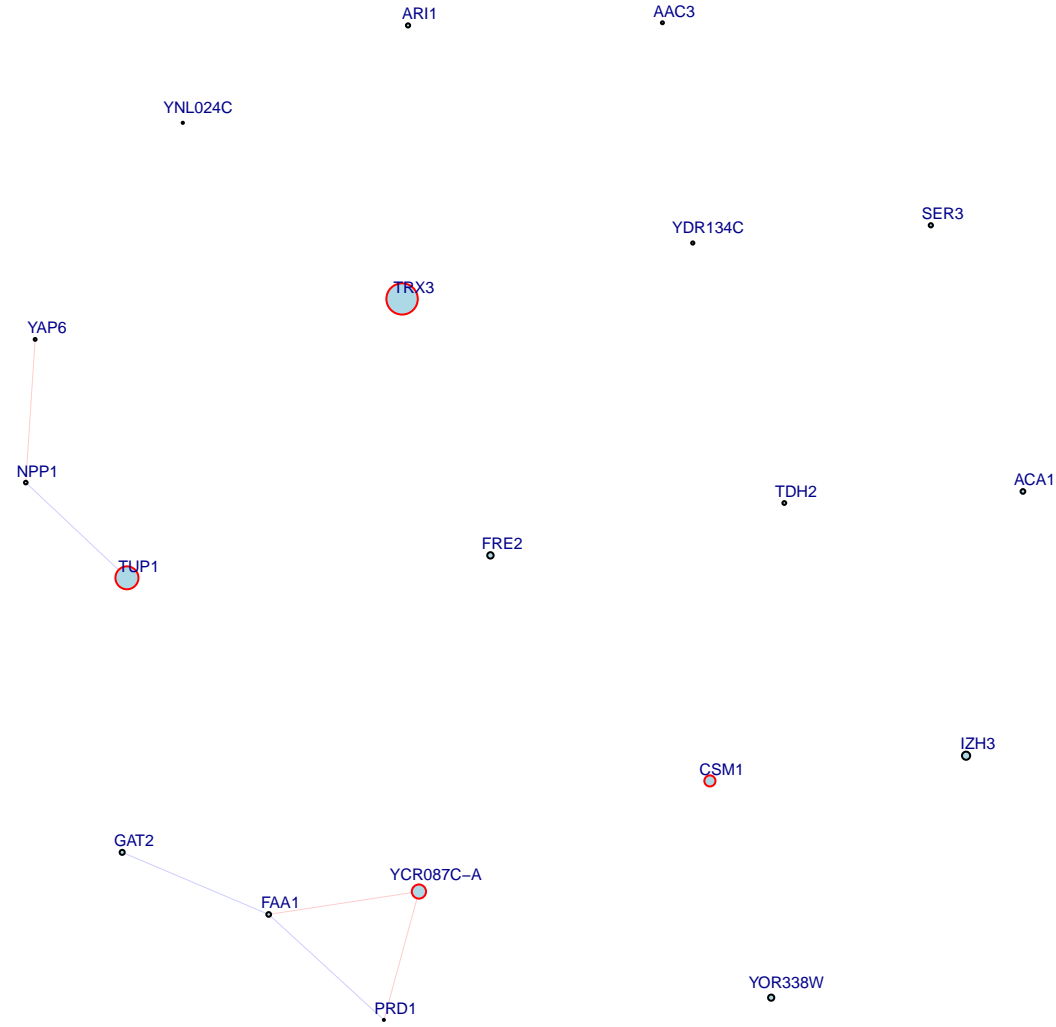

chrIII:262105\_C/T top 28 down genes

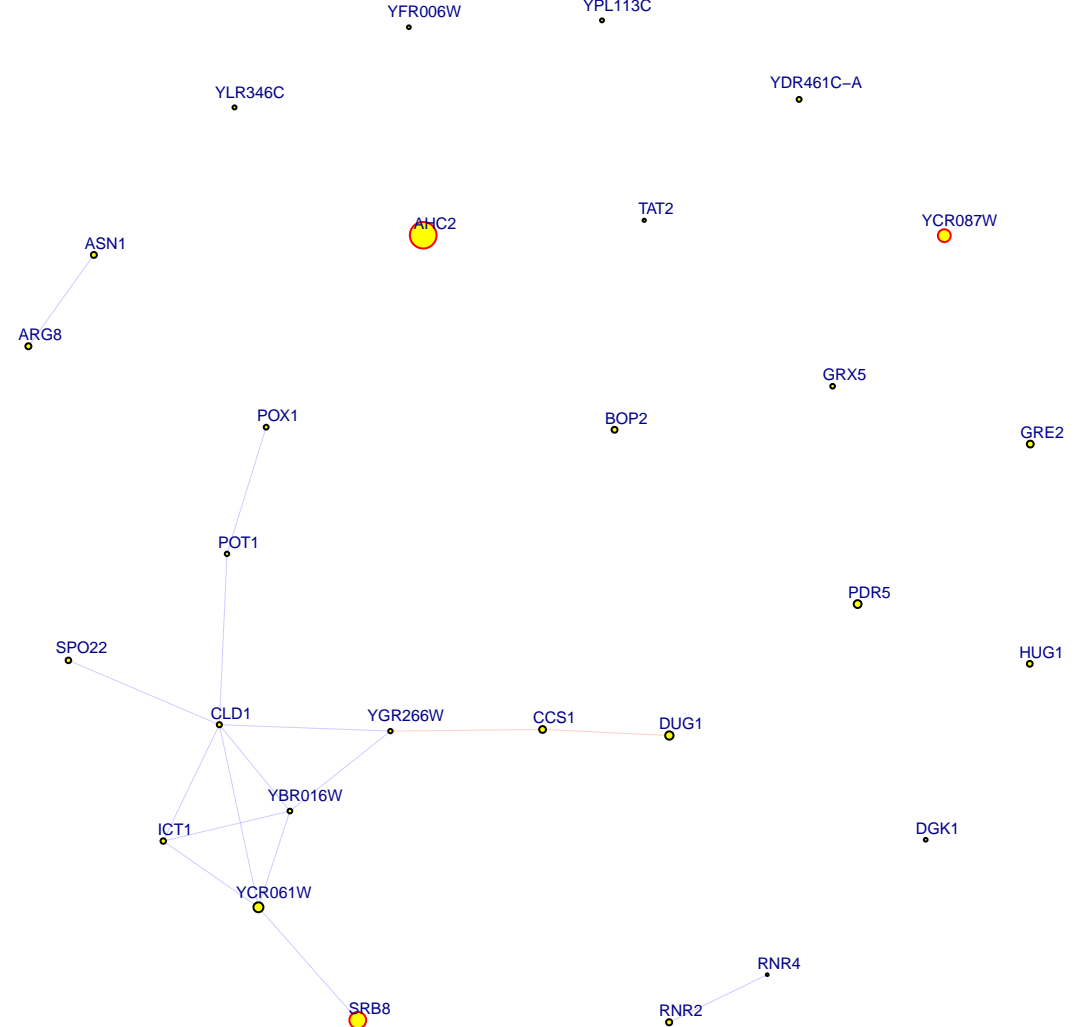

chrIII:262105\_C/T top 47 up and down genes

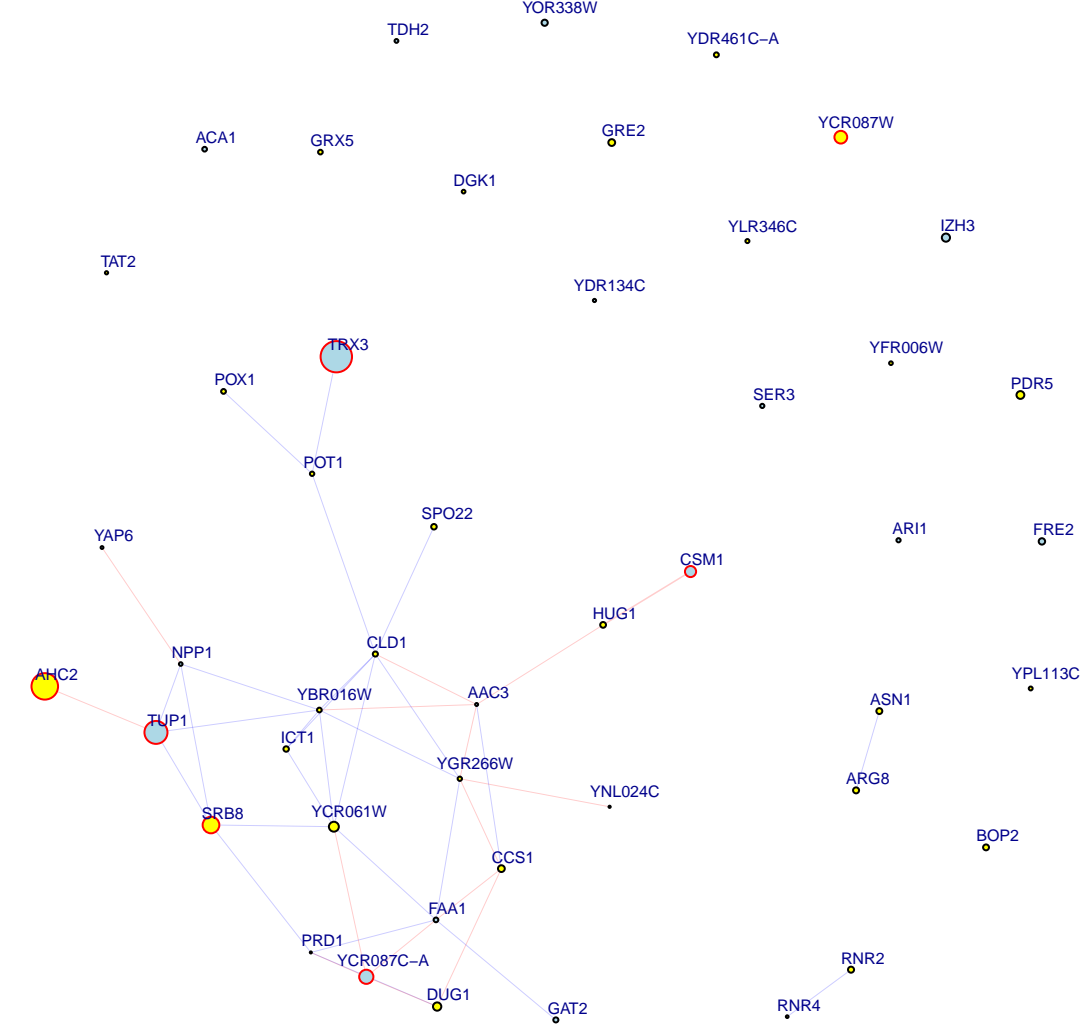

chrIV:46090\_C/G top 50 up genes

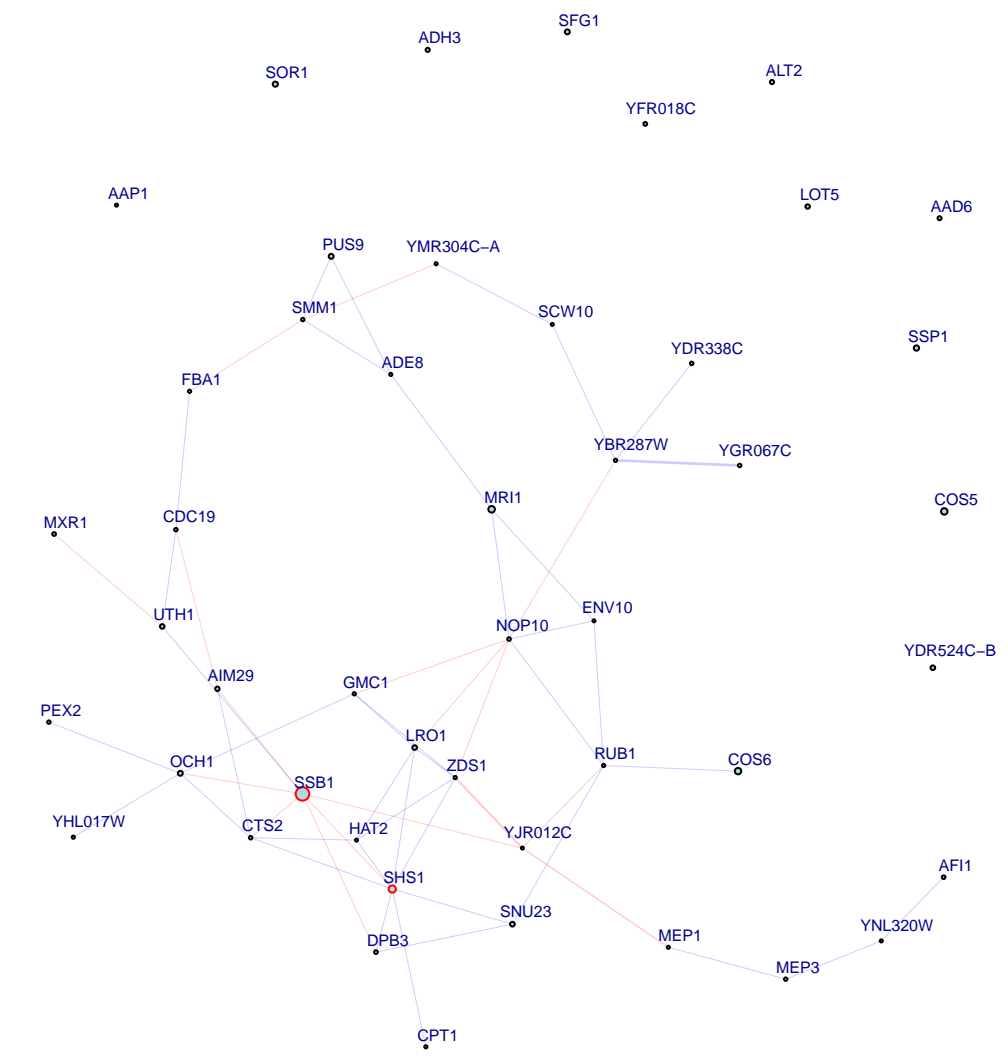

chrIV:46090\_C/G top 50 down genes

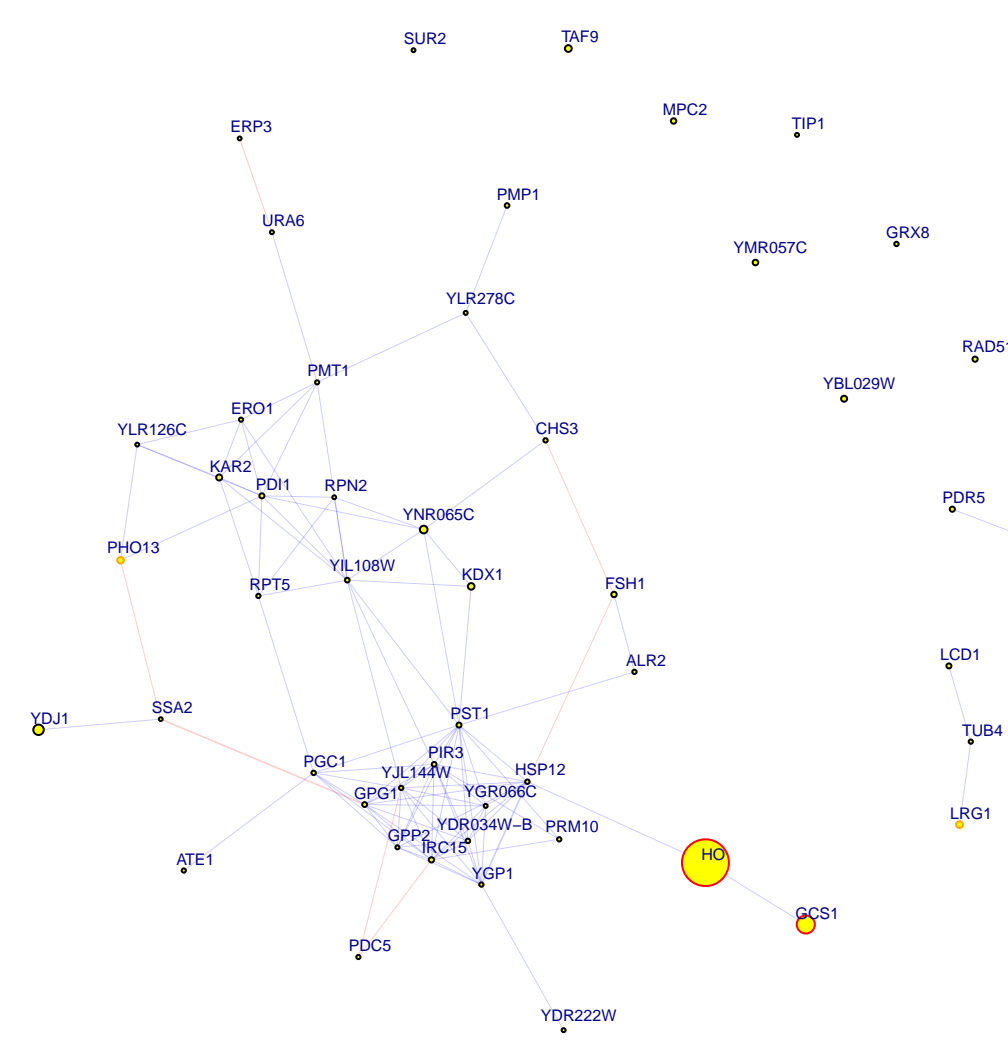

chrIV:46090\_C/G top 100 up and down genes

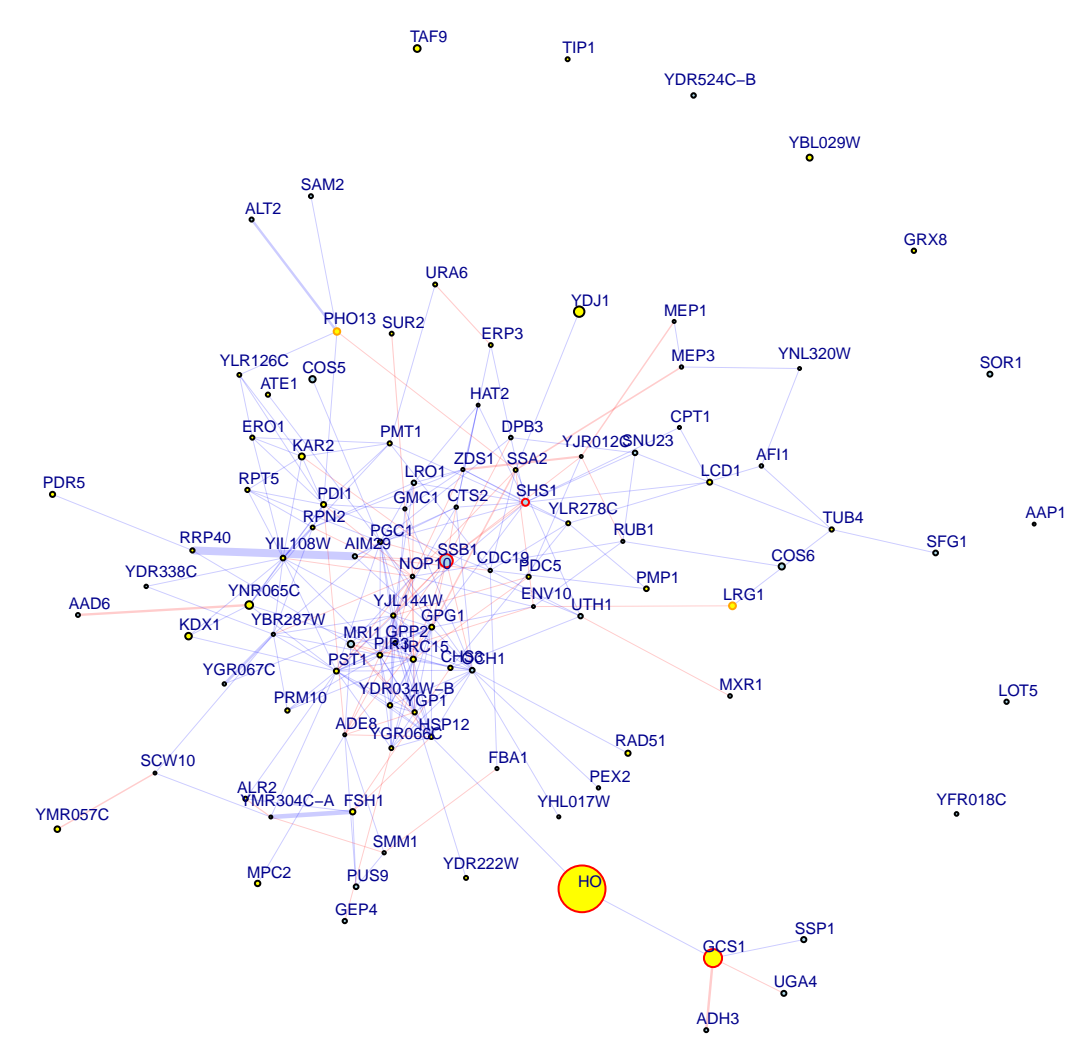



chrIV:156943\_A/G top 50 up genes

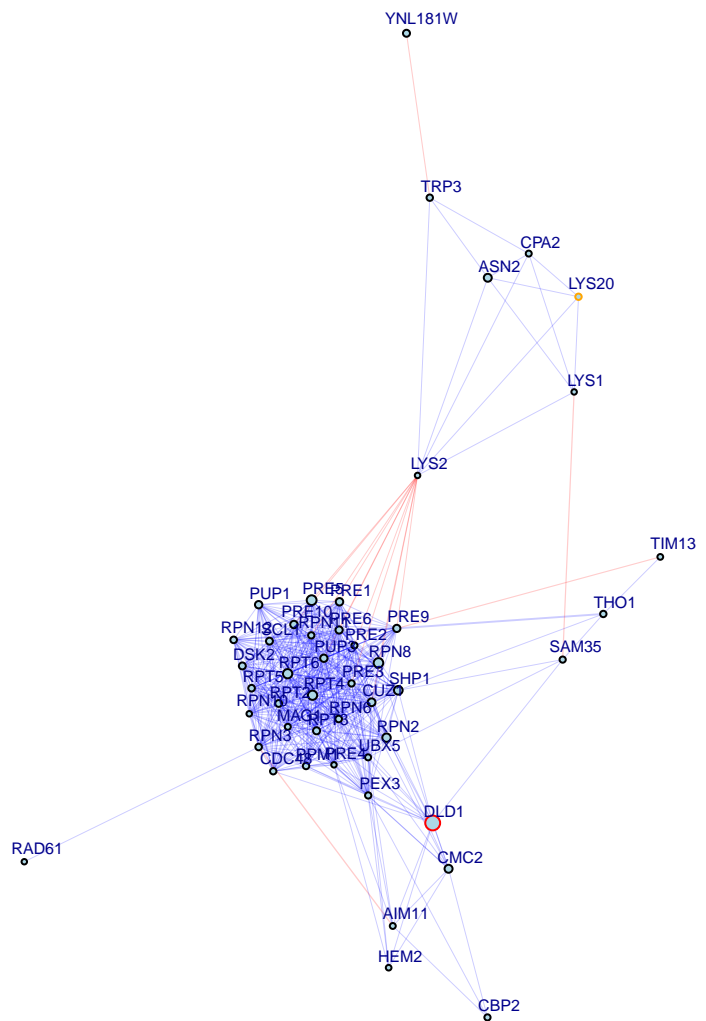

chrIV:156943\_A/G top 50 down genes

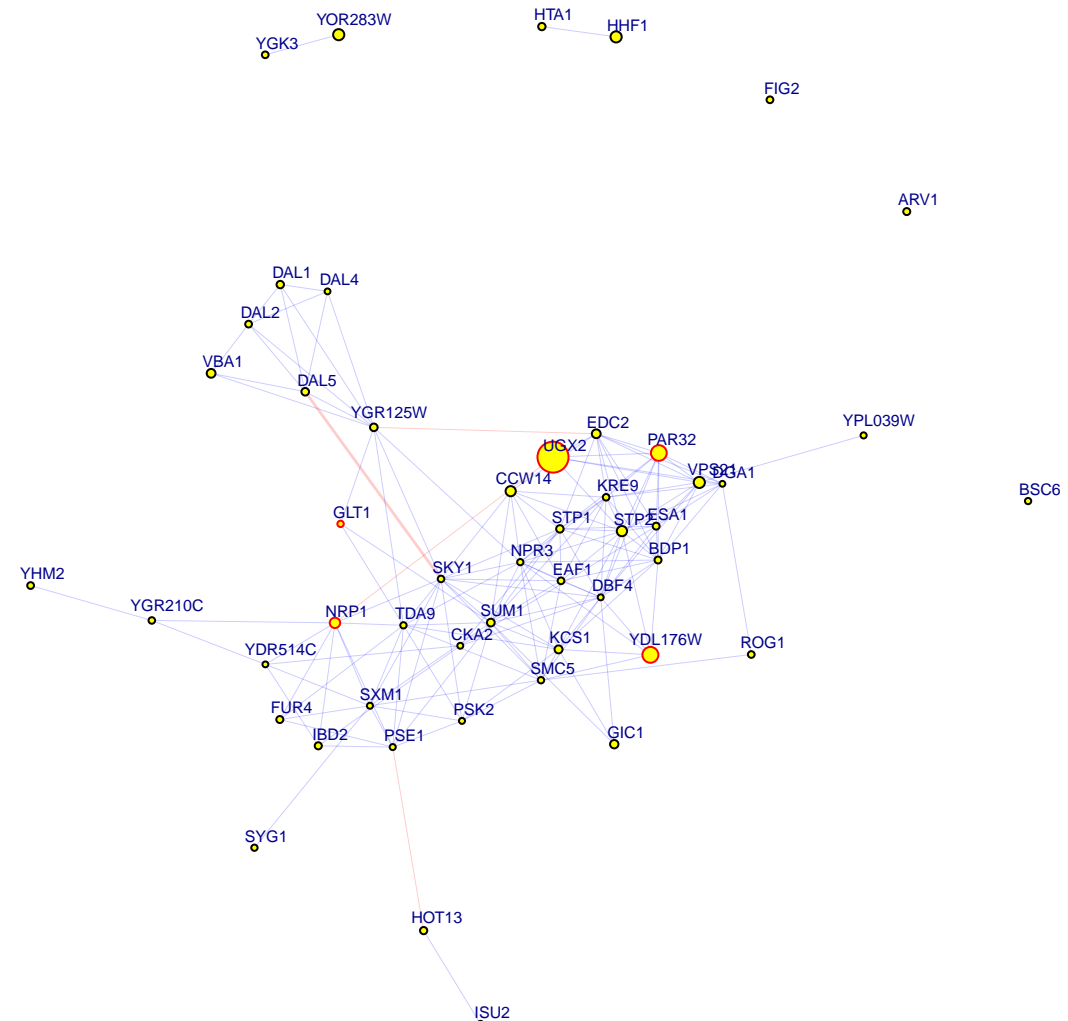

chrIV:156943\_A/G top 100 up and down genes

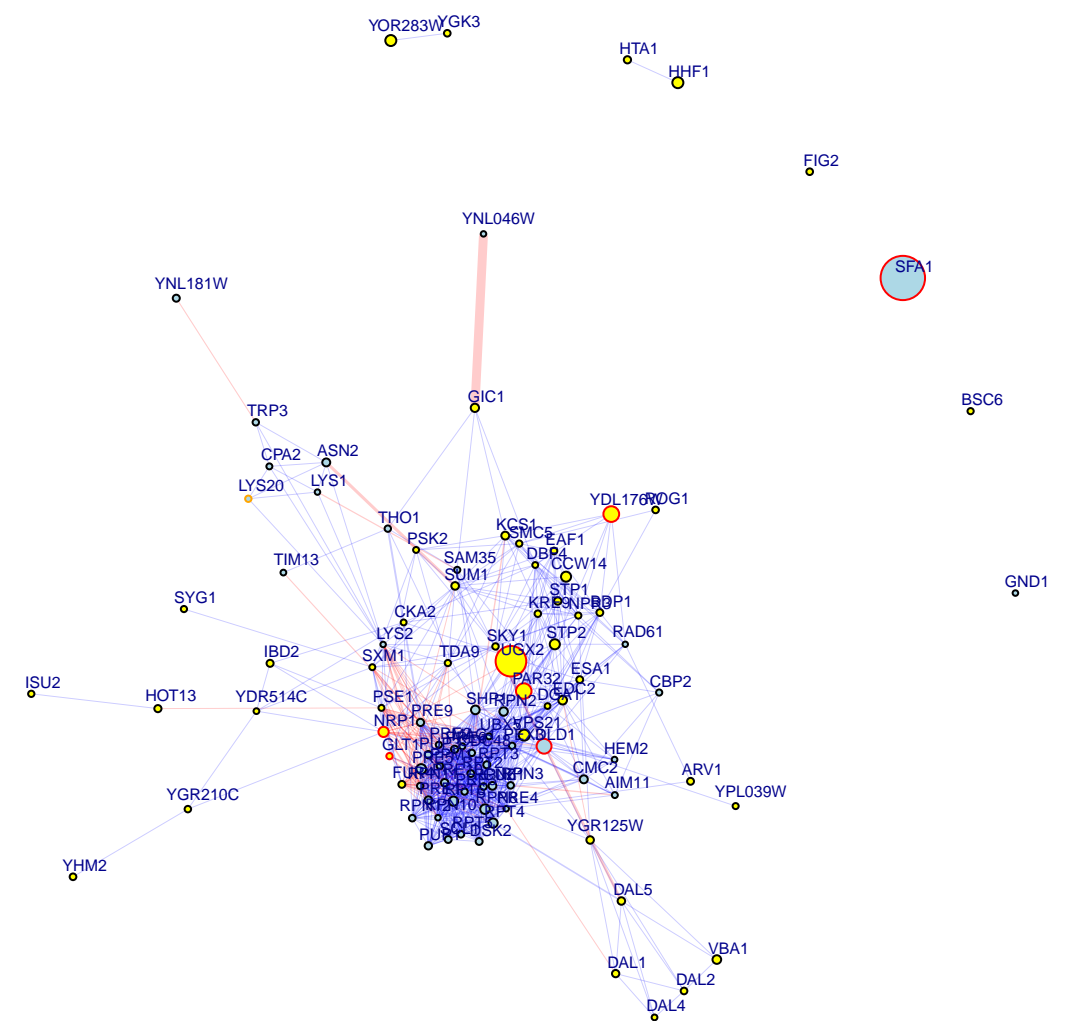

chrIV:215523\_T/C top 50 up genes

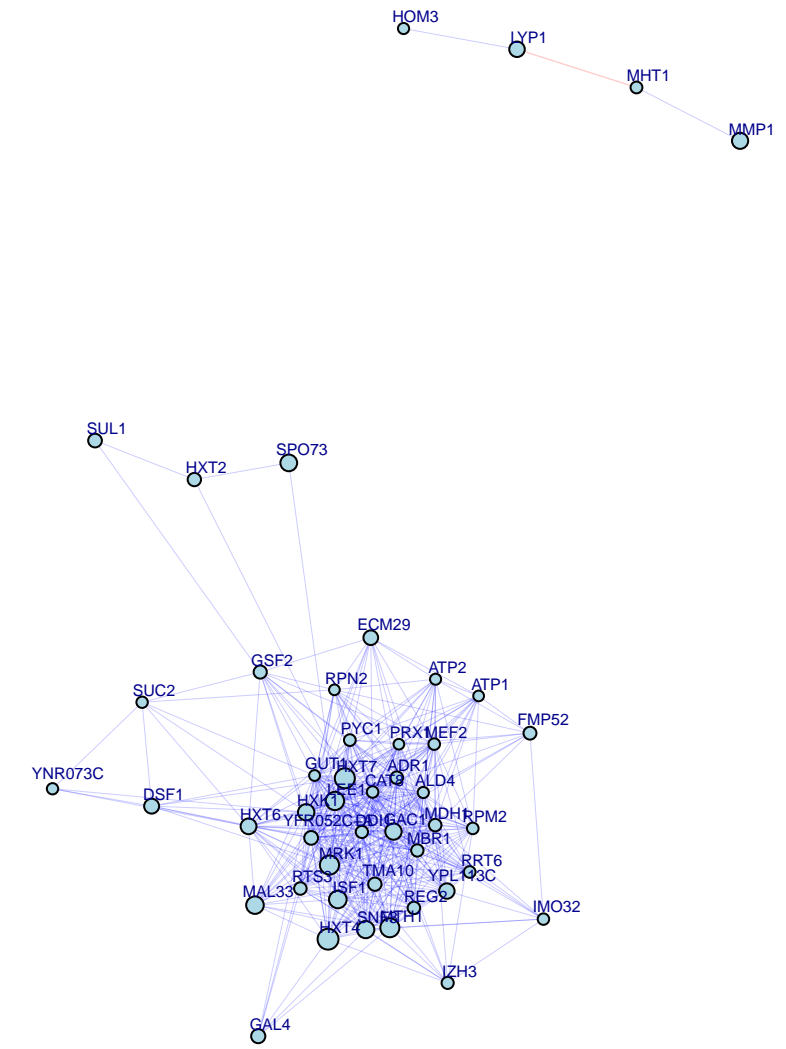

chrIV:215523\_T/C top 50 down genes

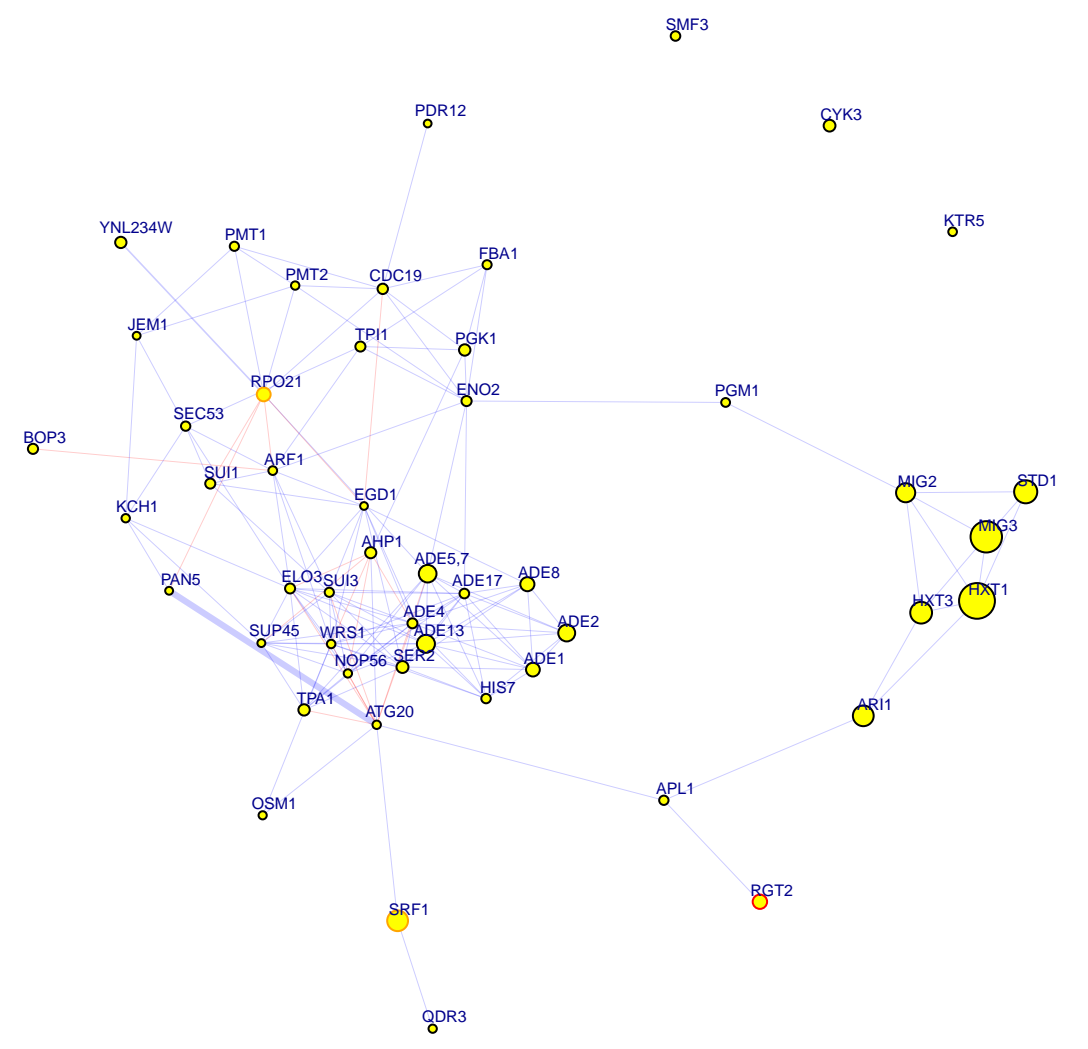

chrIV:215523\_T/C top 100 up and down genes

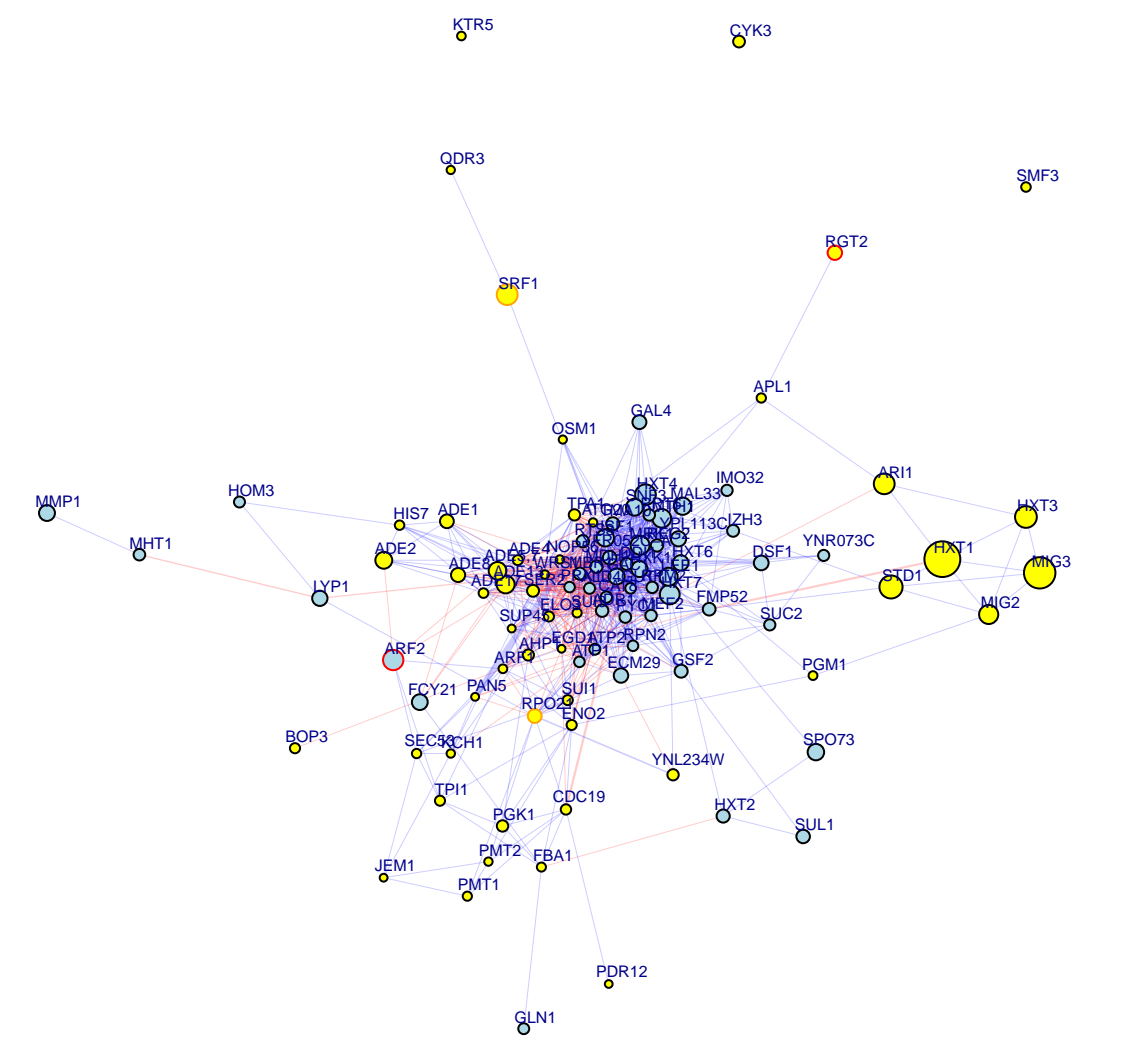

chrIV:461656\_A/G top 50 up genes

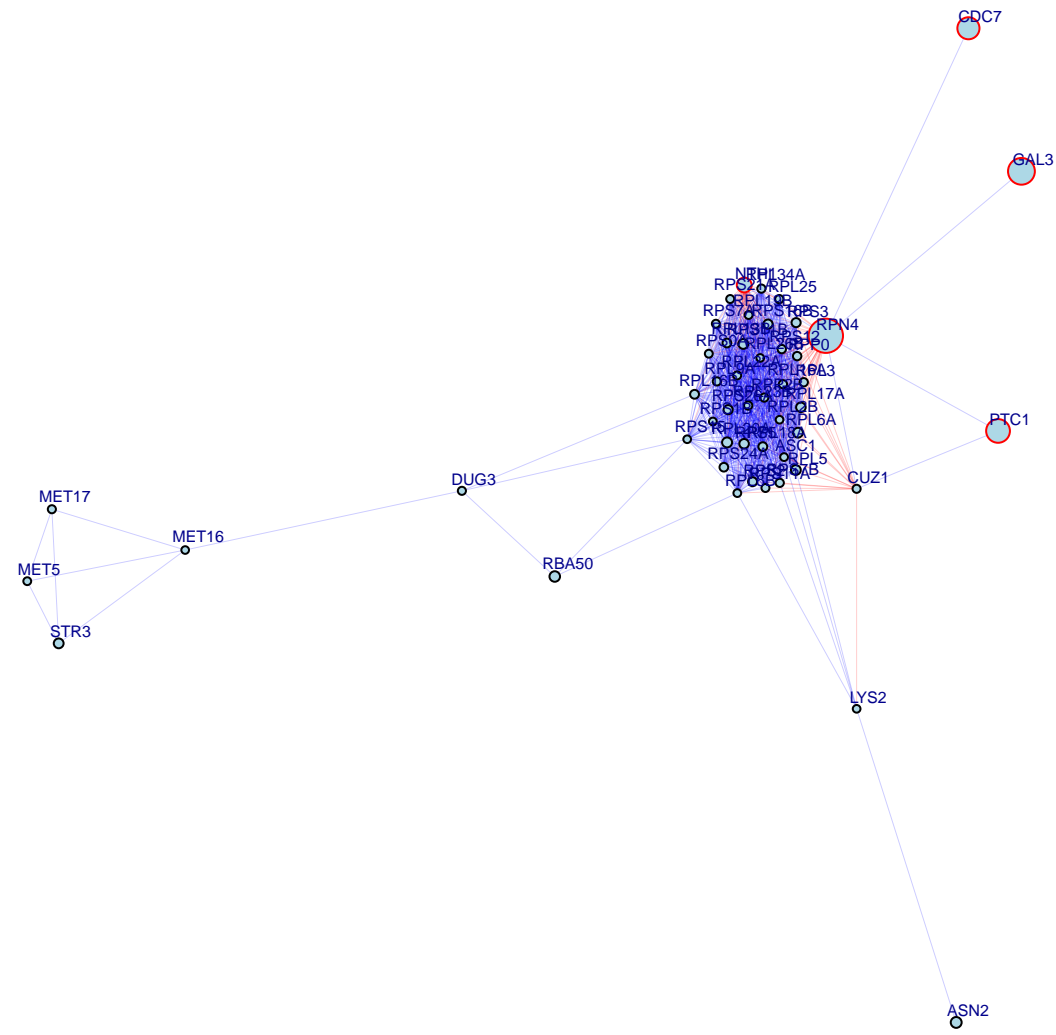

chrIV:461656\_A/G top 50 down genes

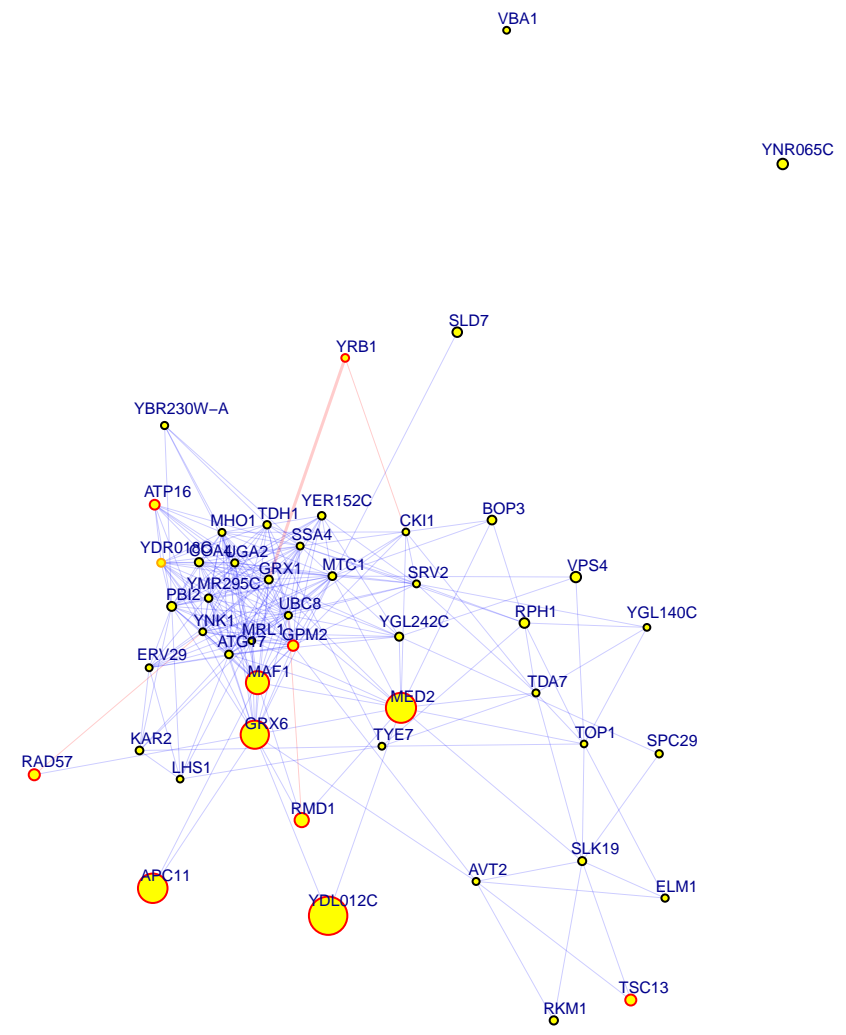

chrIV:461656\_A/G top 100 up and down genes

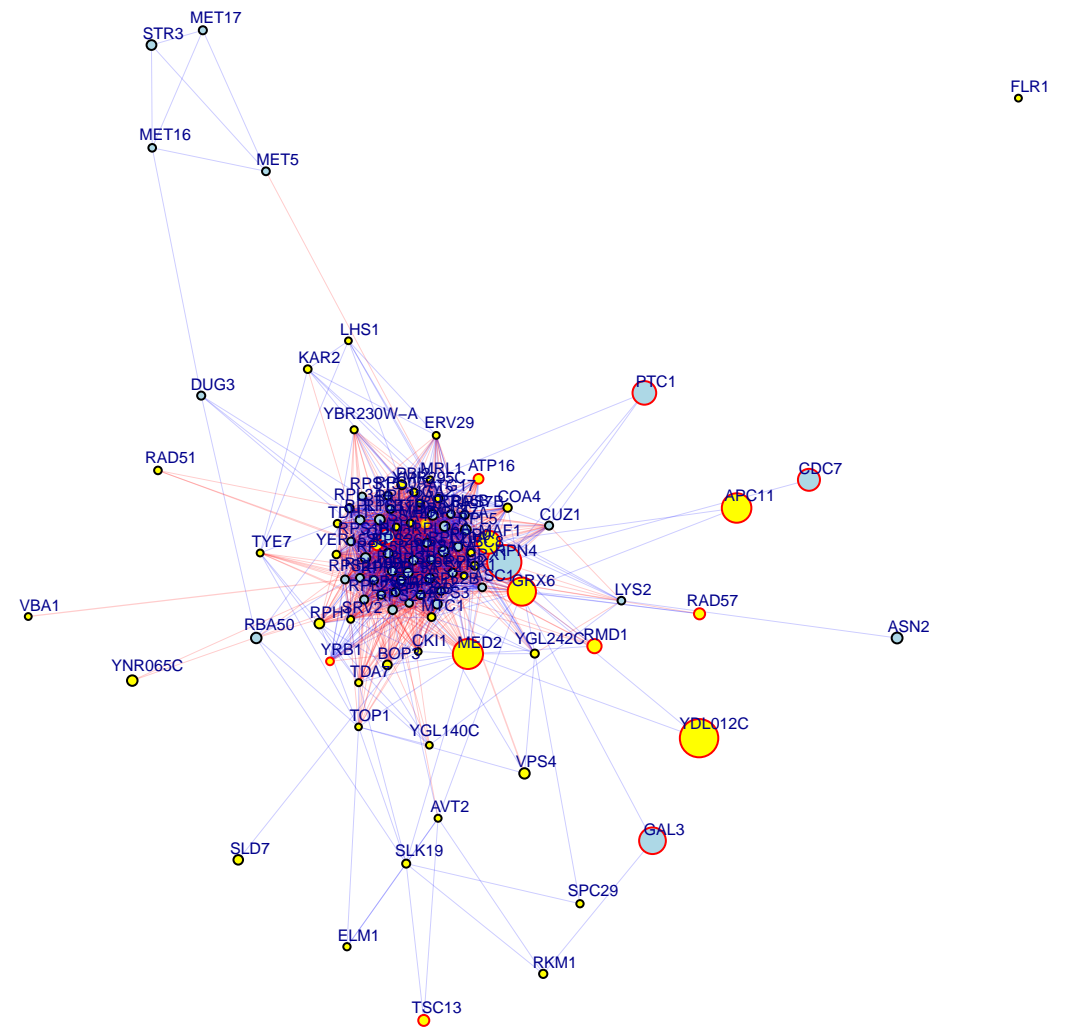

chrIV:509407\_G/T top 50 up genes

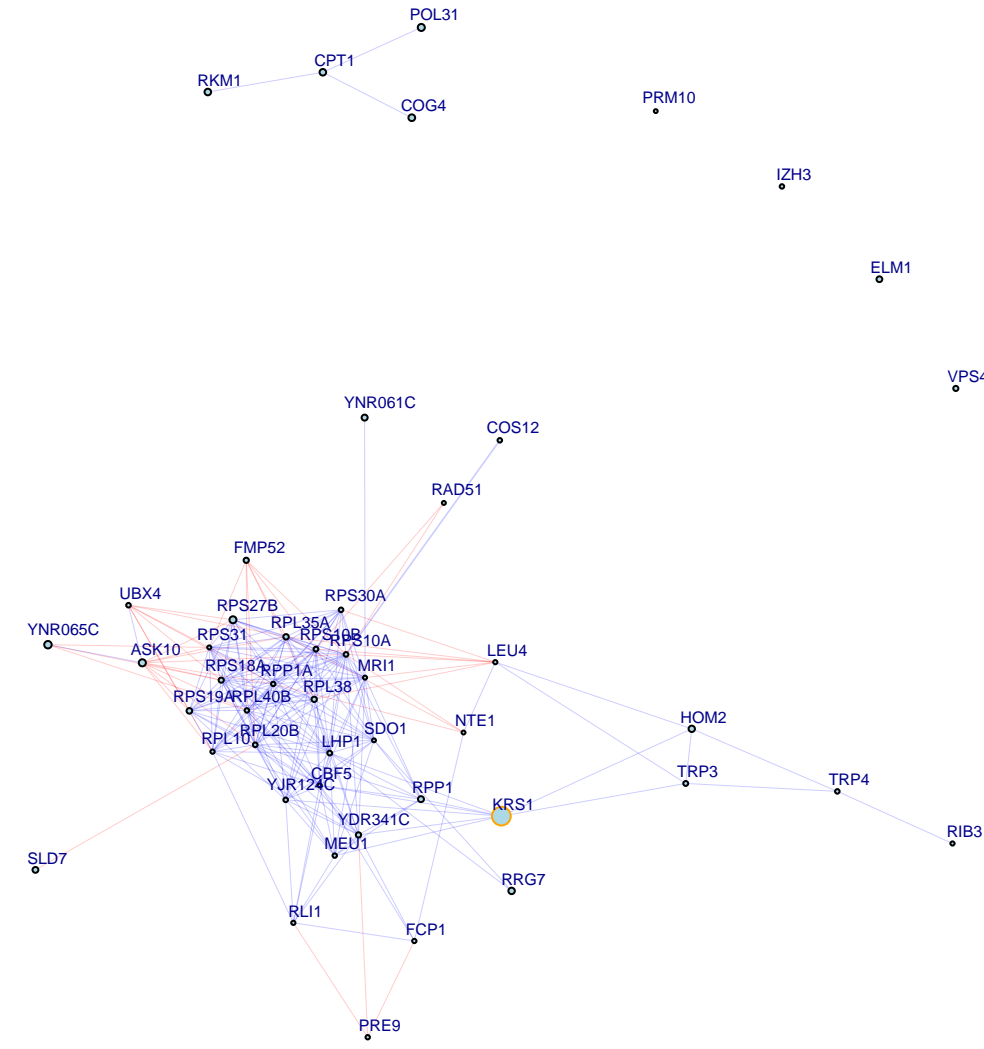

chrIV:509407\_G/T top 50 down genes

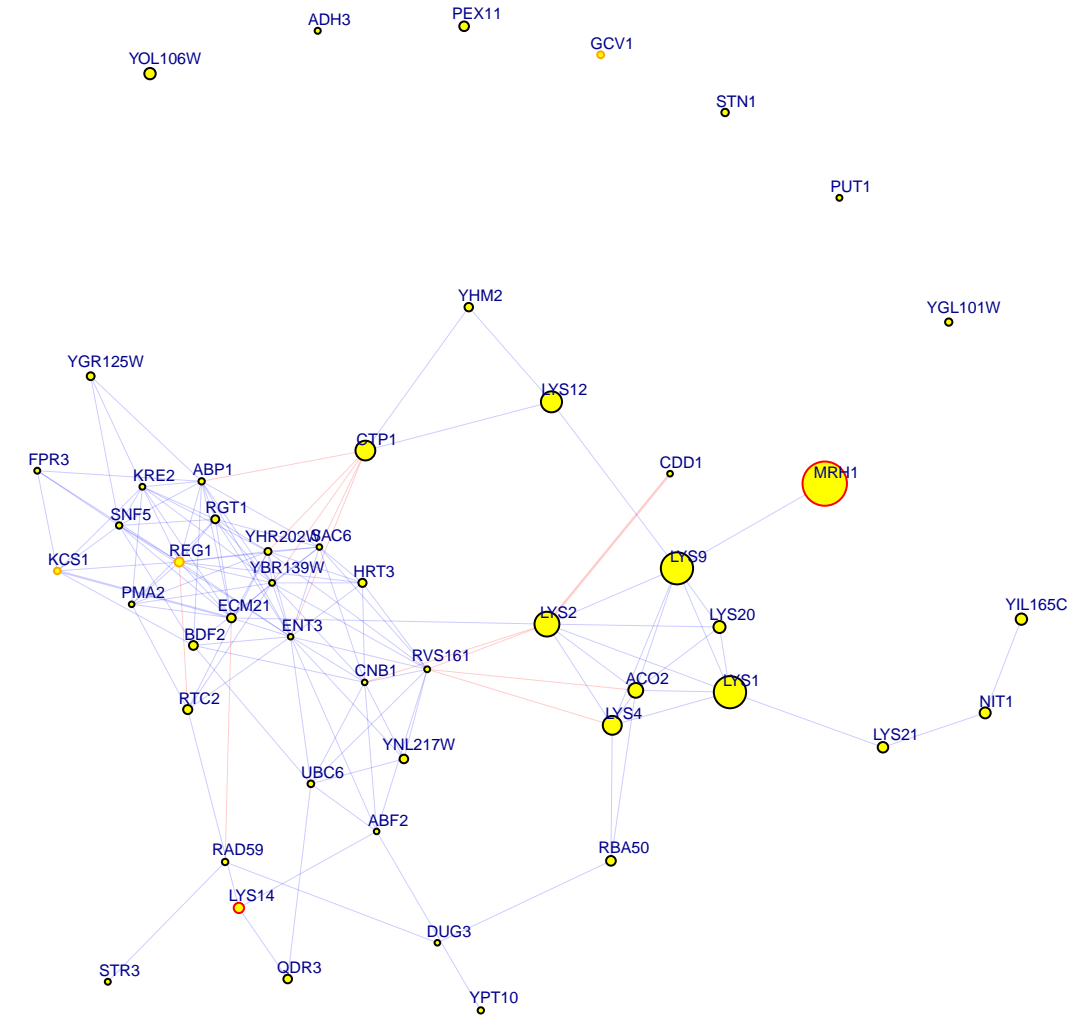

chrIV:509407\_G/T top 100 up and down genes

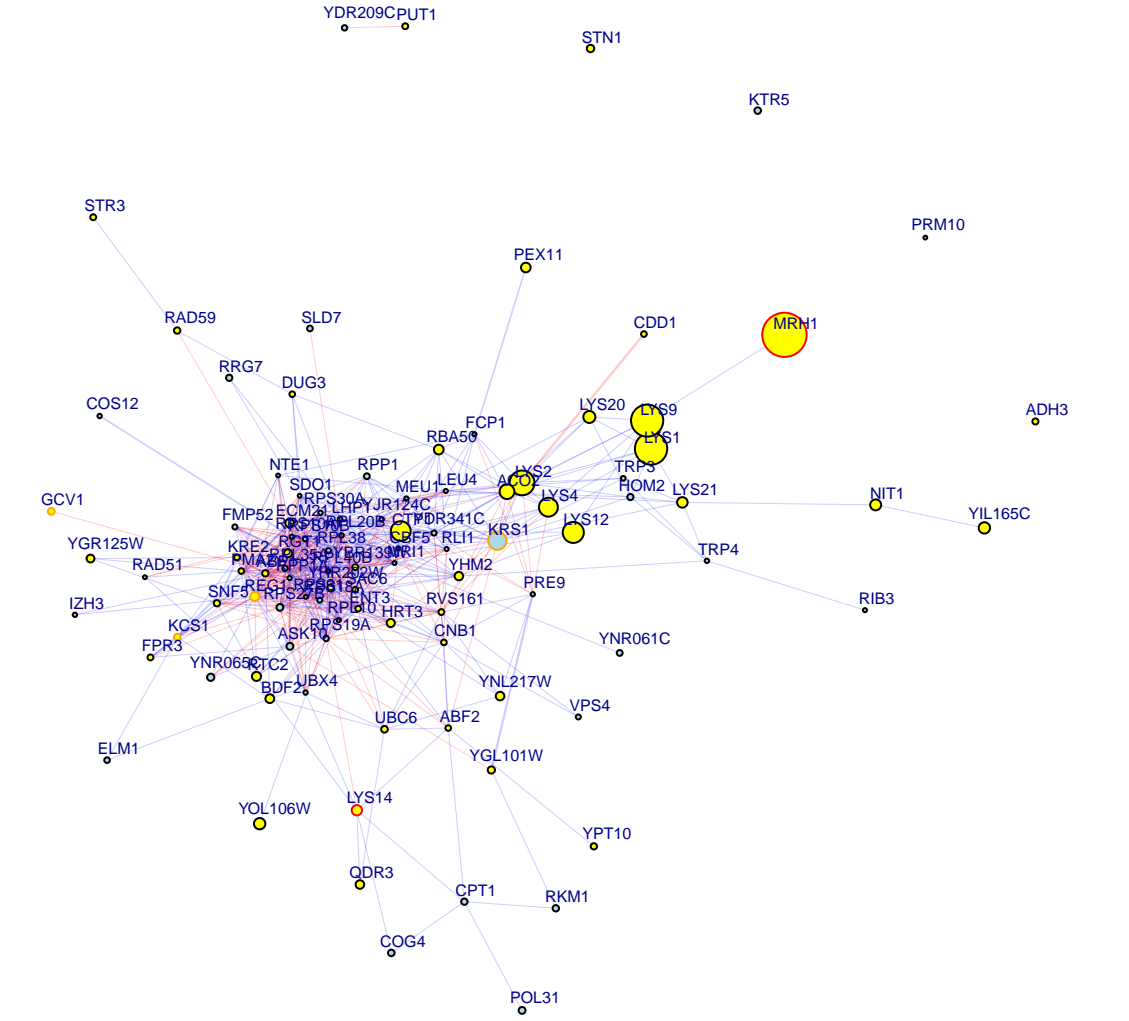



chrIV:681304\_G/A top 50 up genes

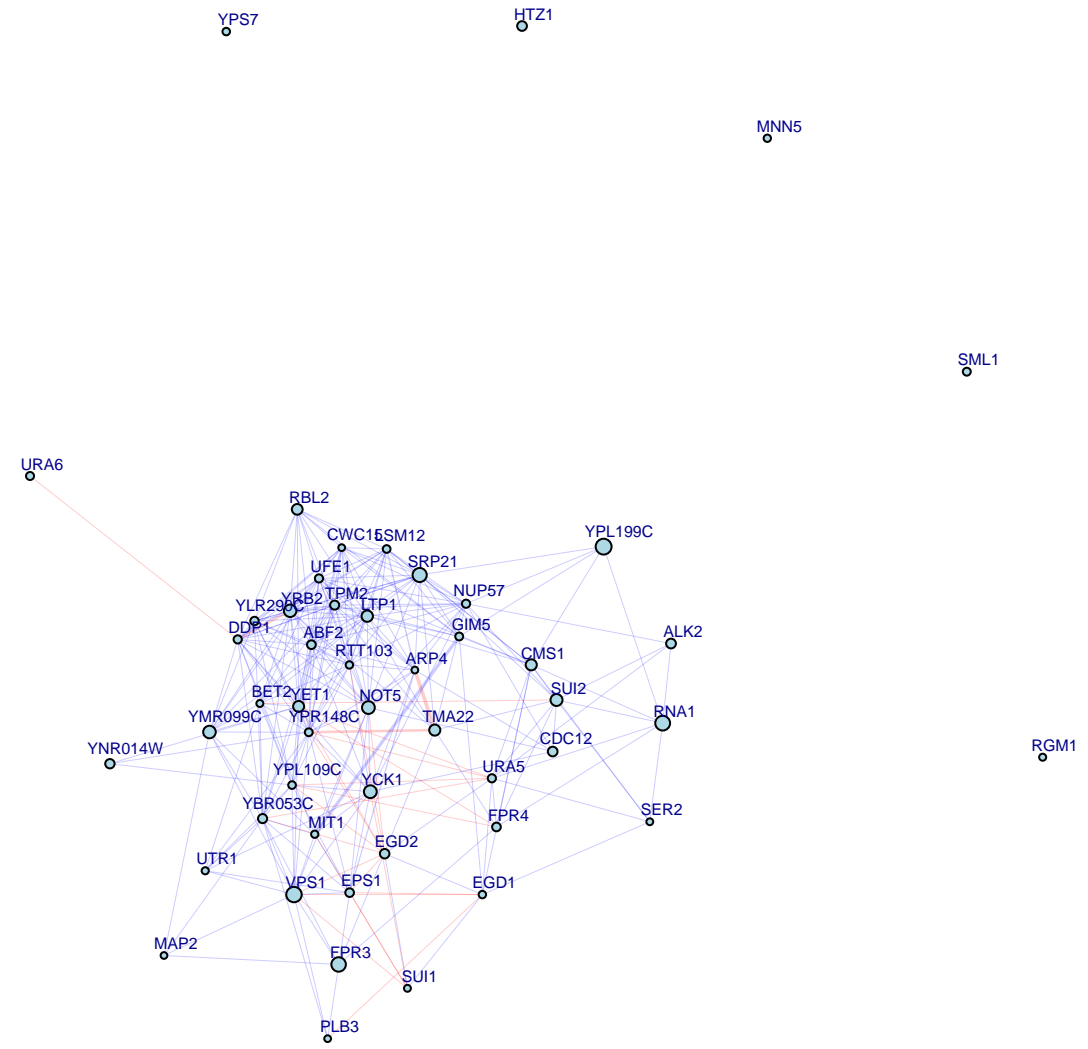

chrIV:681304\_G/A top 50 down genes

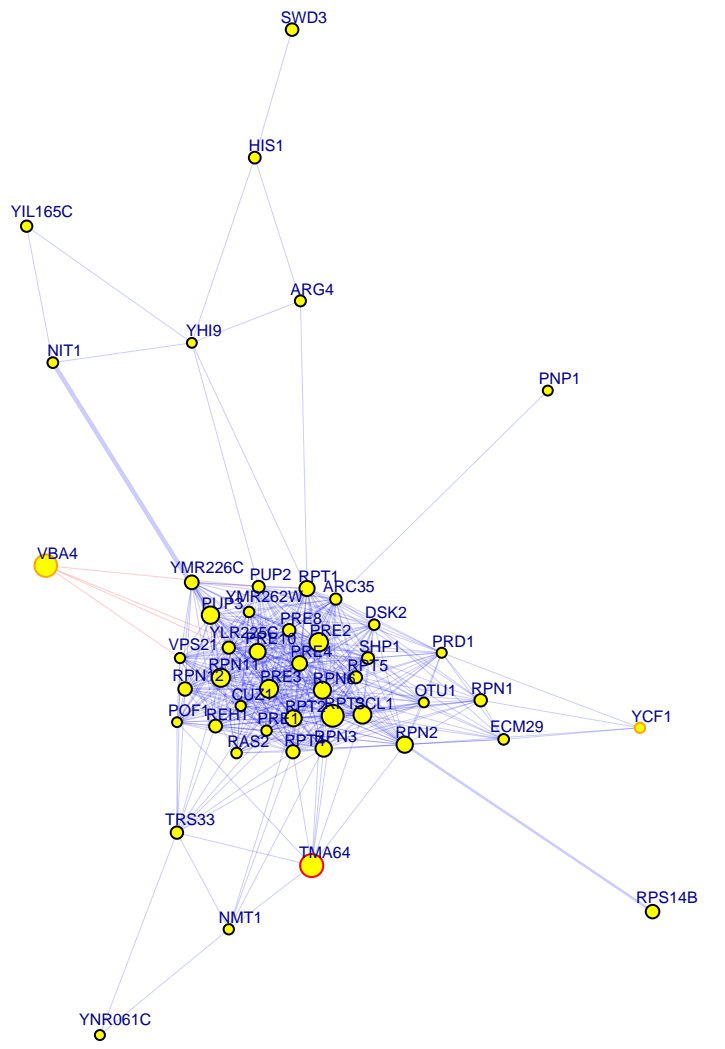

chrIV:681304\_G/A top 100 up and down genes

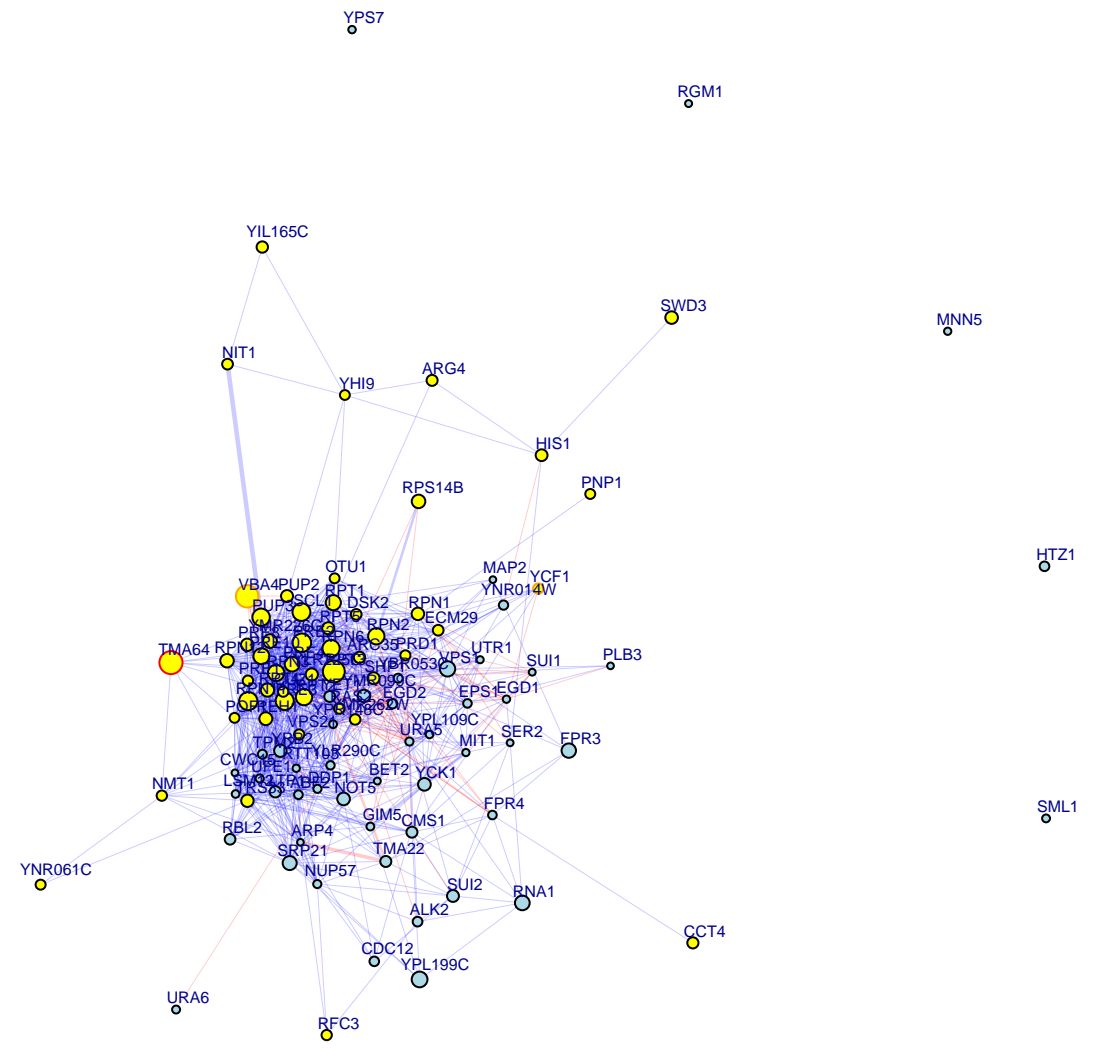

chrIV:745766\_G/A top 50 up genes

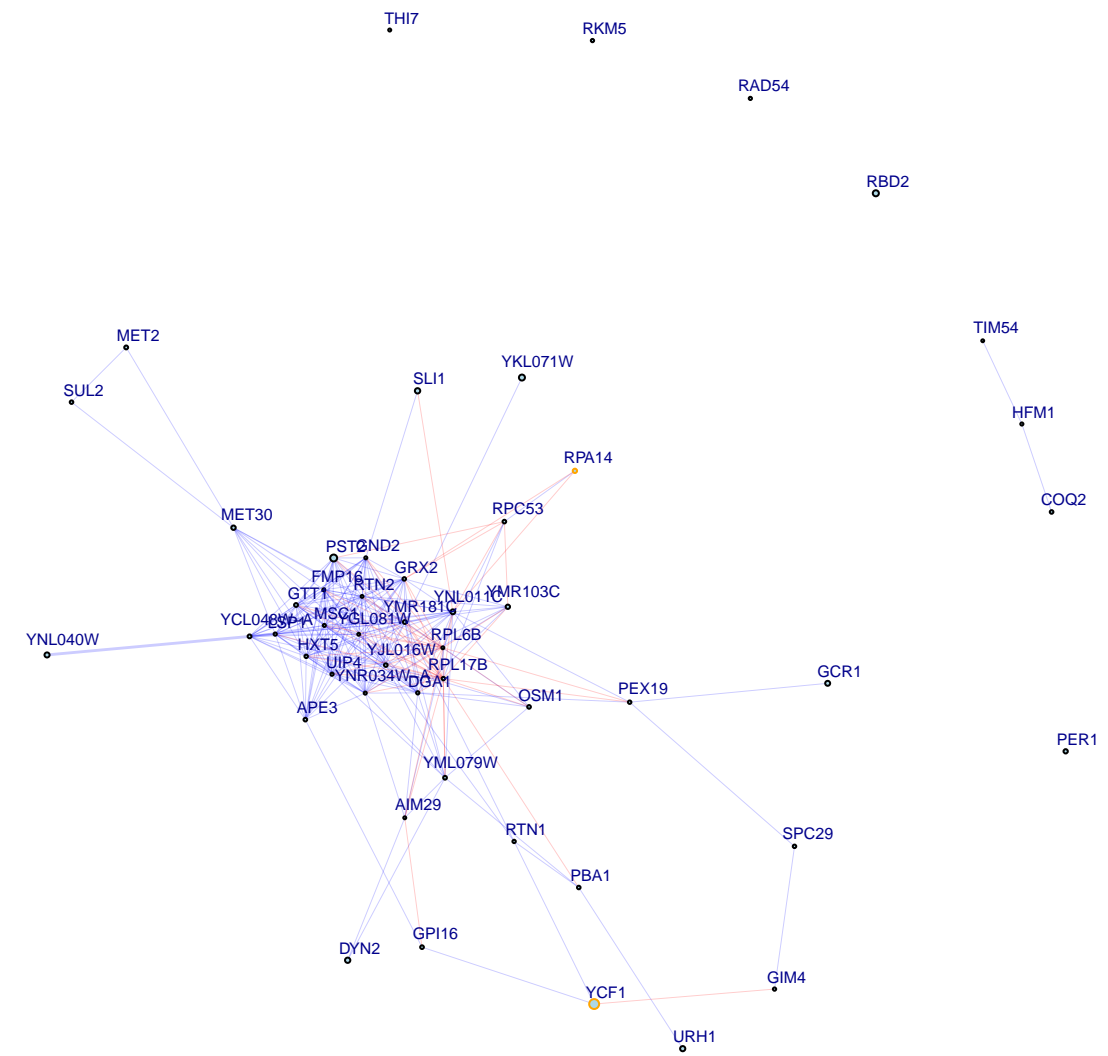

chrIV:745766\_G/A top 50 down genes

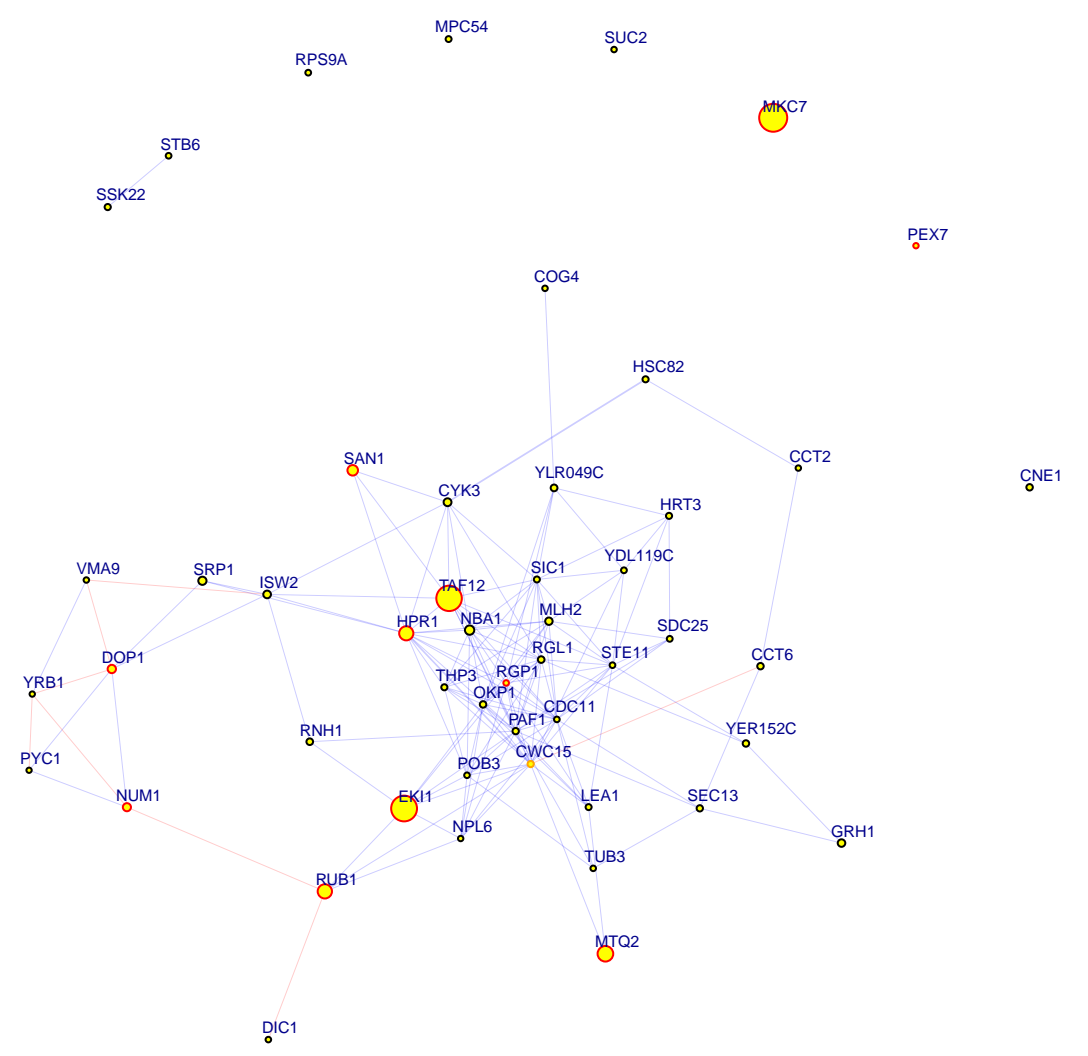

chrIV:745766\_G/A top 100 up and down genes

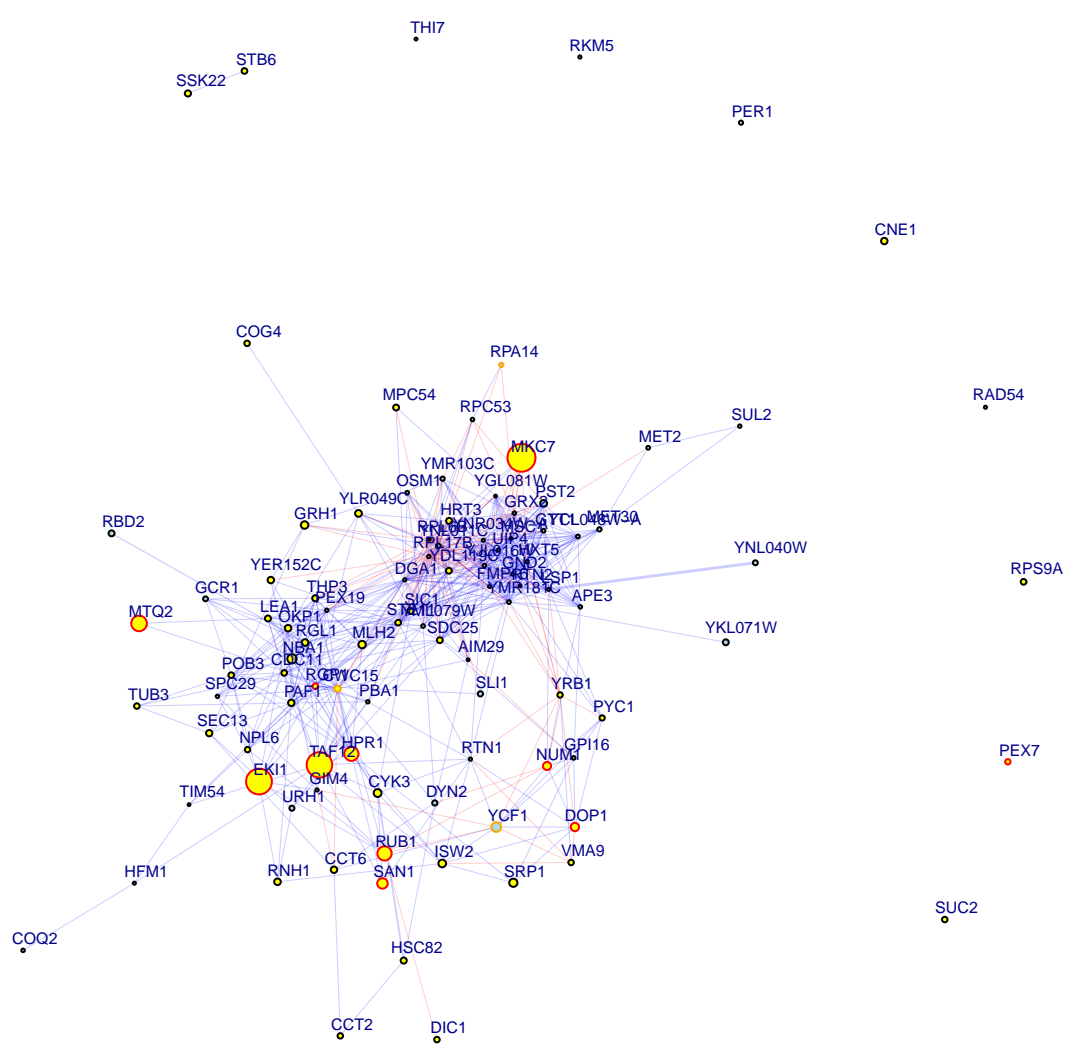

chrIV:975156\_A/G top 50 up genes

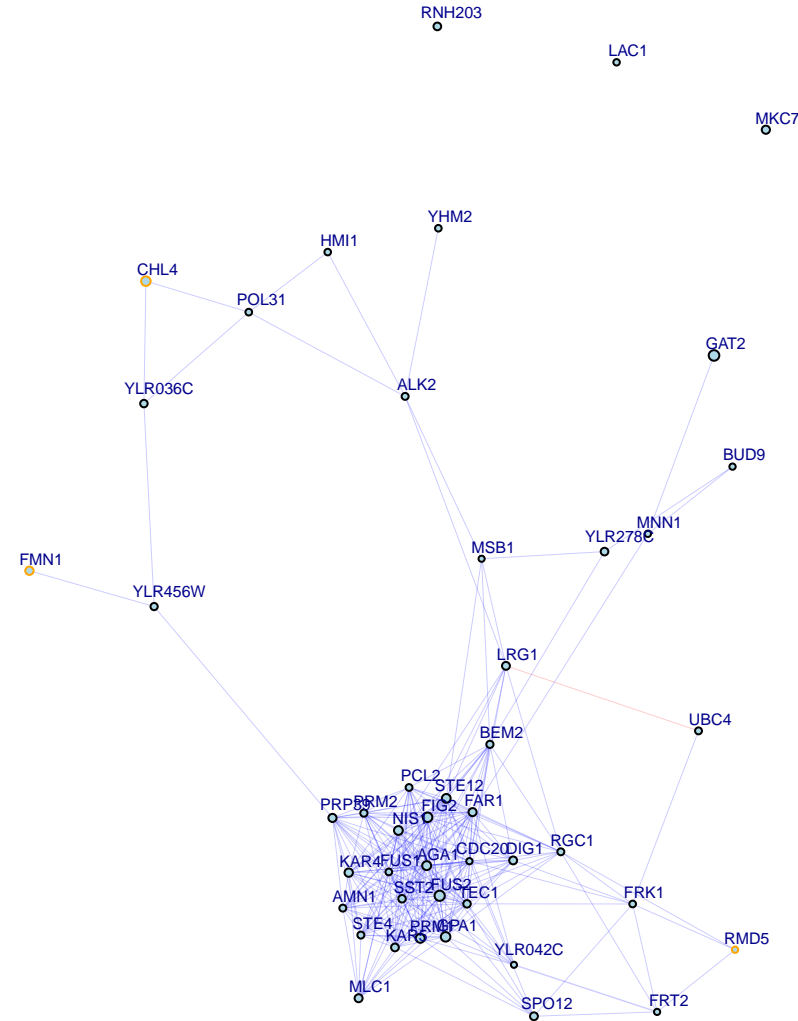

chrIV:975156\_A/G top 50 down genes

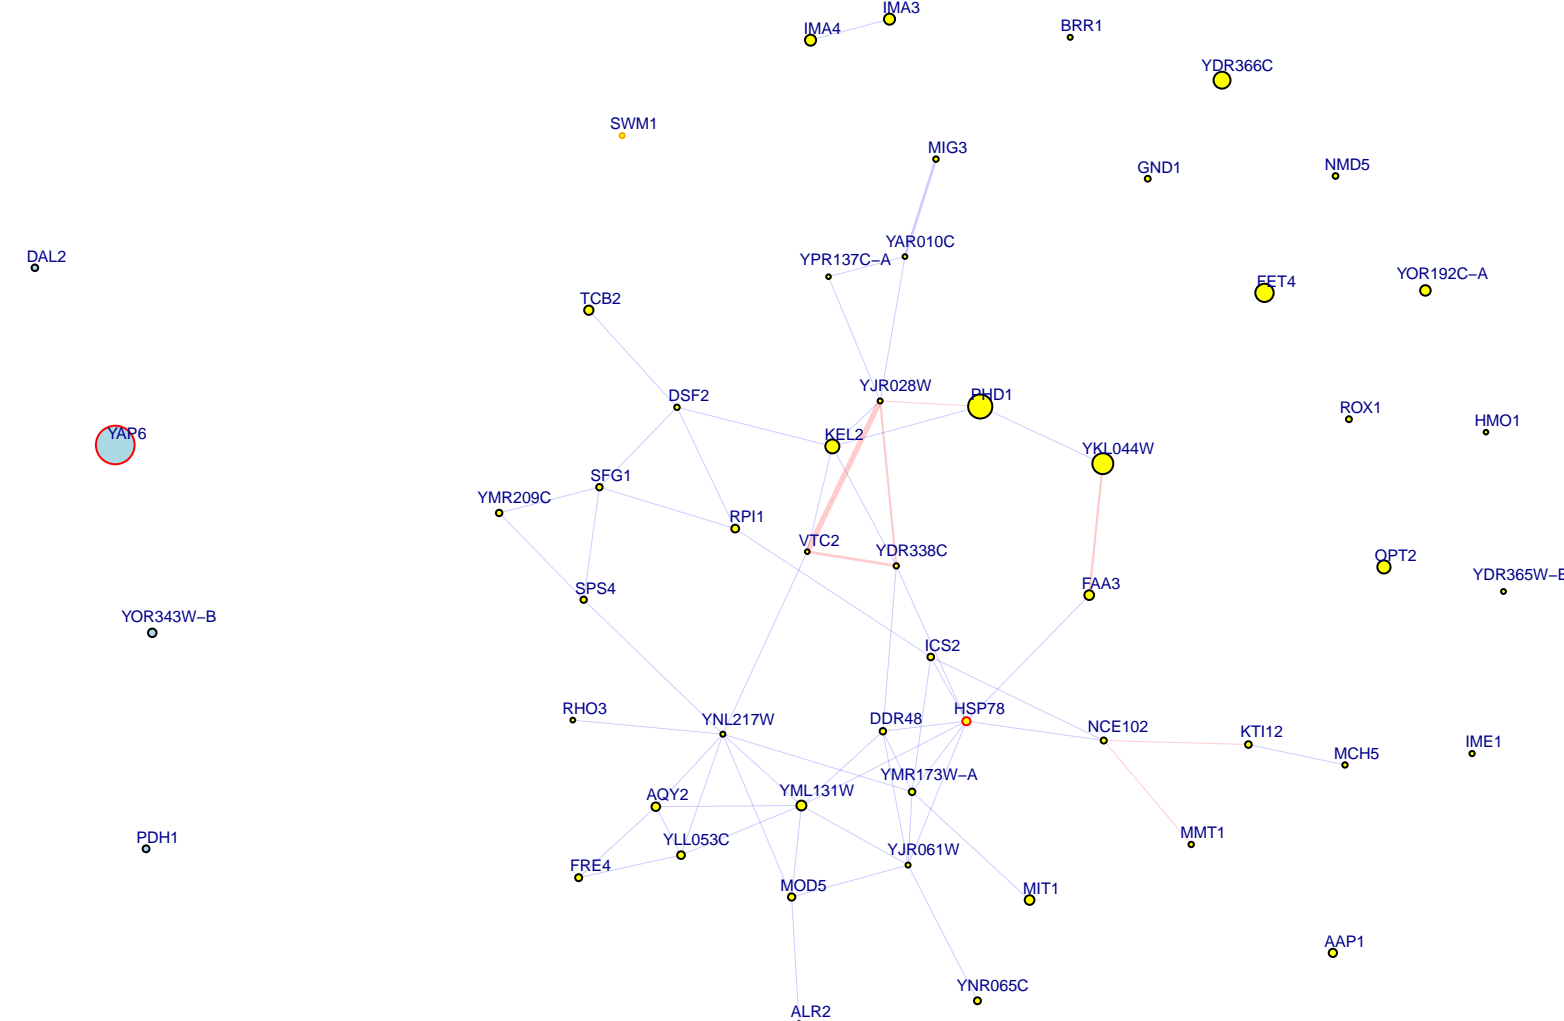

chrIV:975156\_A/G top 100 up and down genes

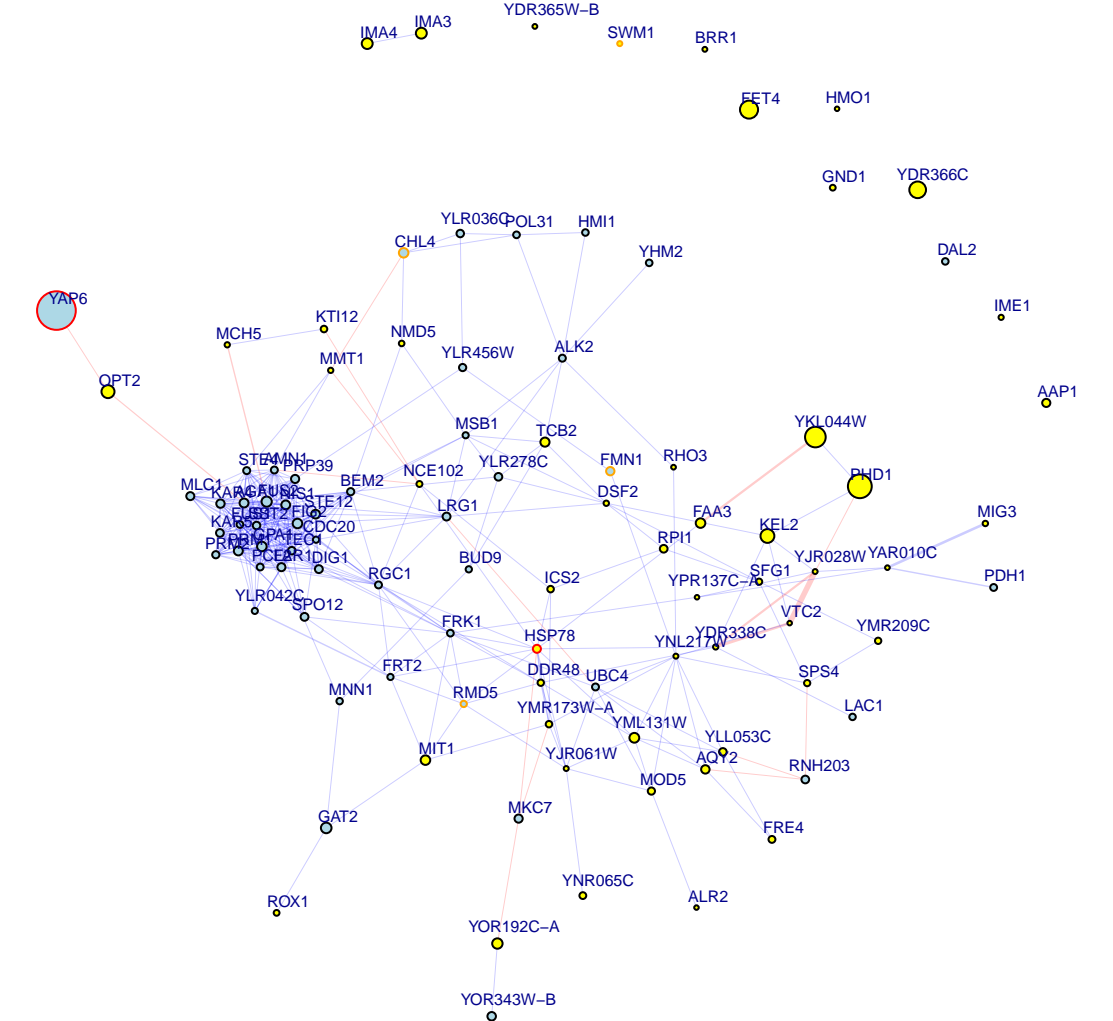







chrIV:1521369\_A/C top 50 up genes

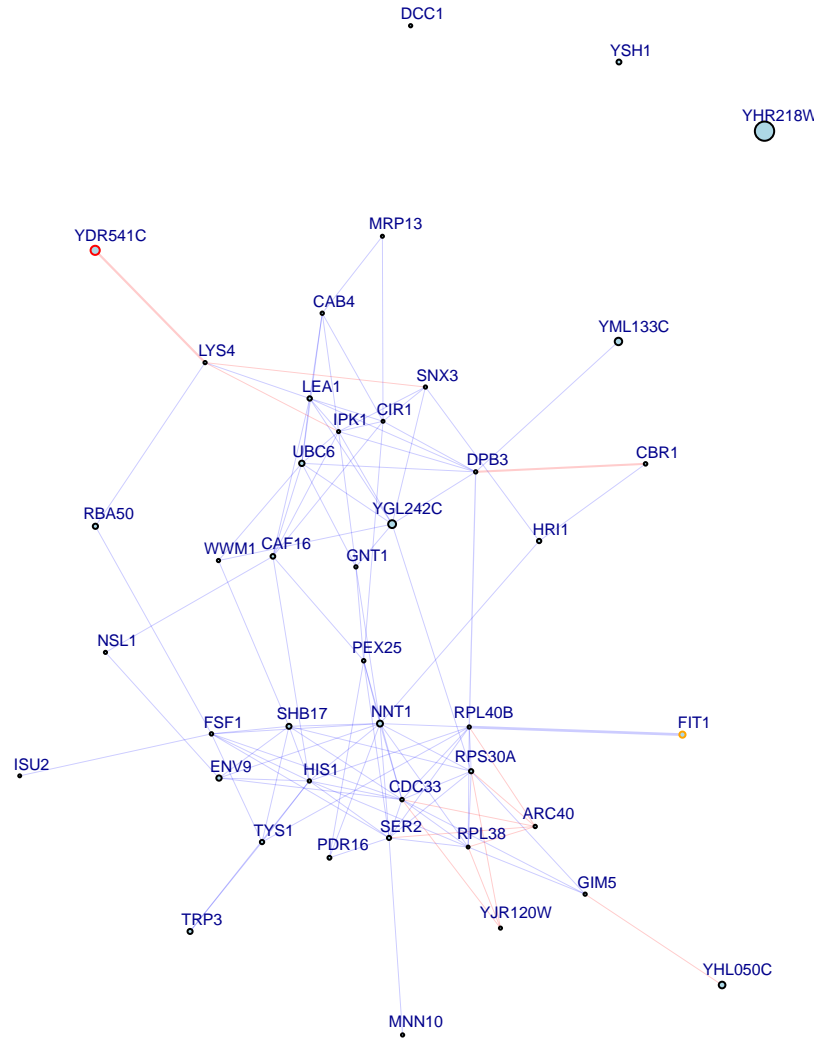

chrIV:1521369\_A/C top 50 down genes

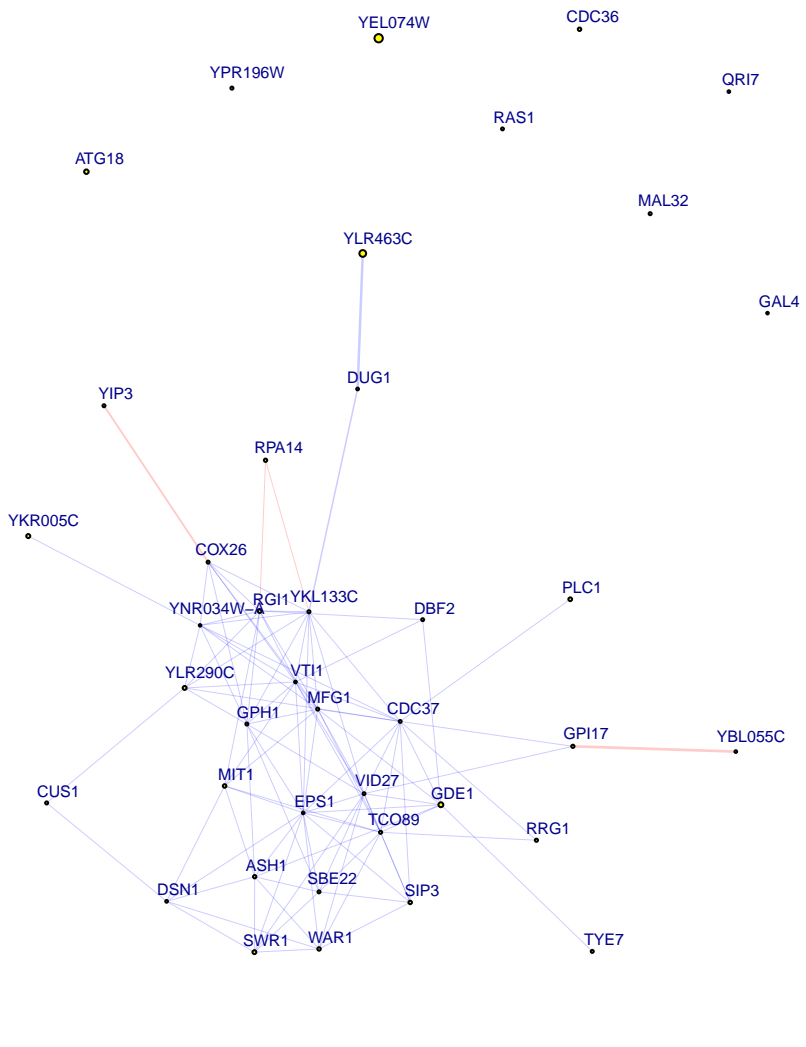

chrIV:1521369\_A/C top 100 up and down genes

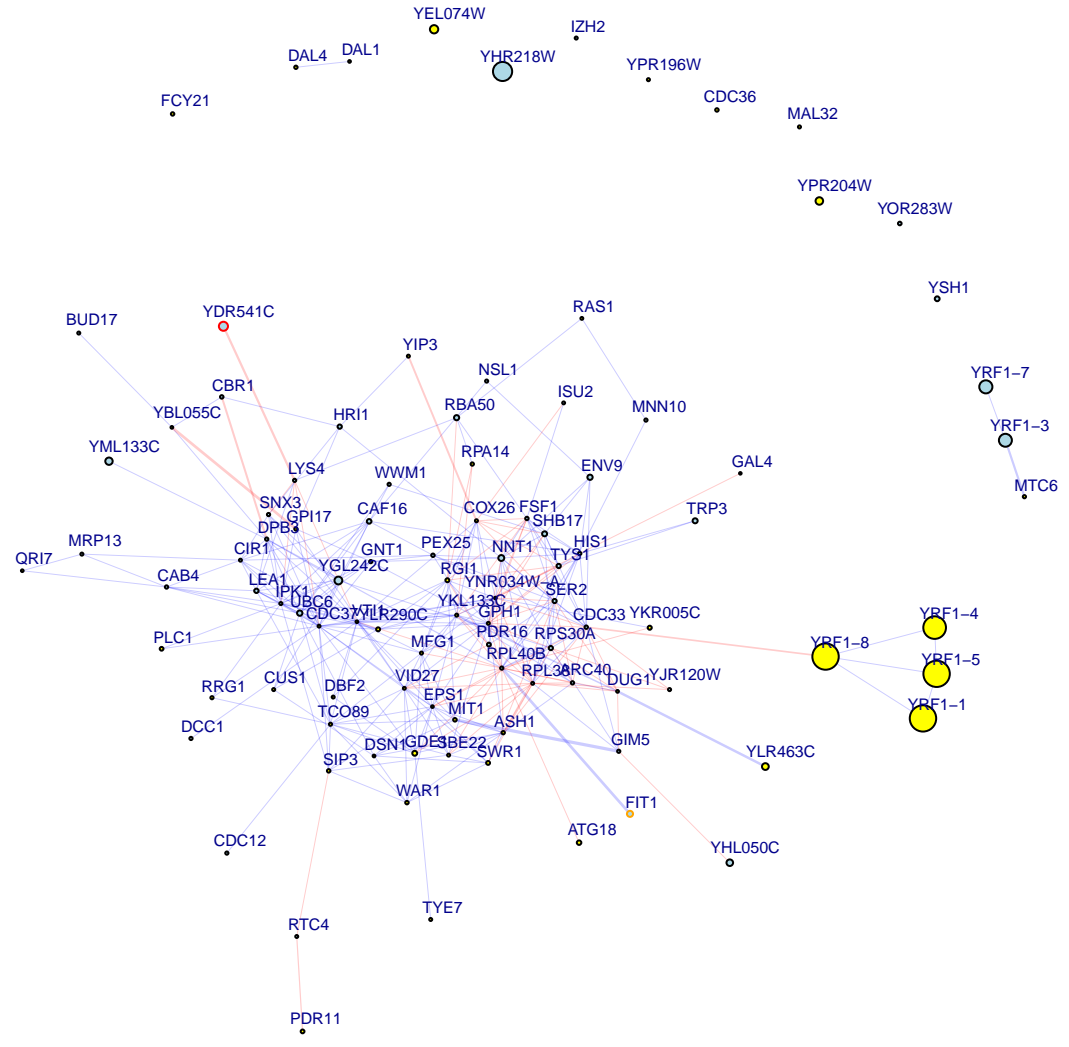

chrV:11186\_T/C top 46 up genes

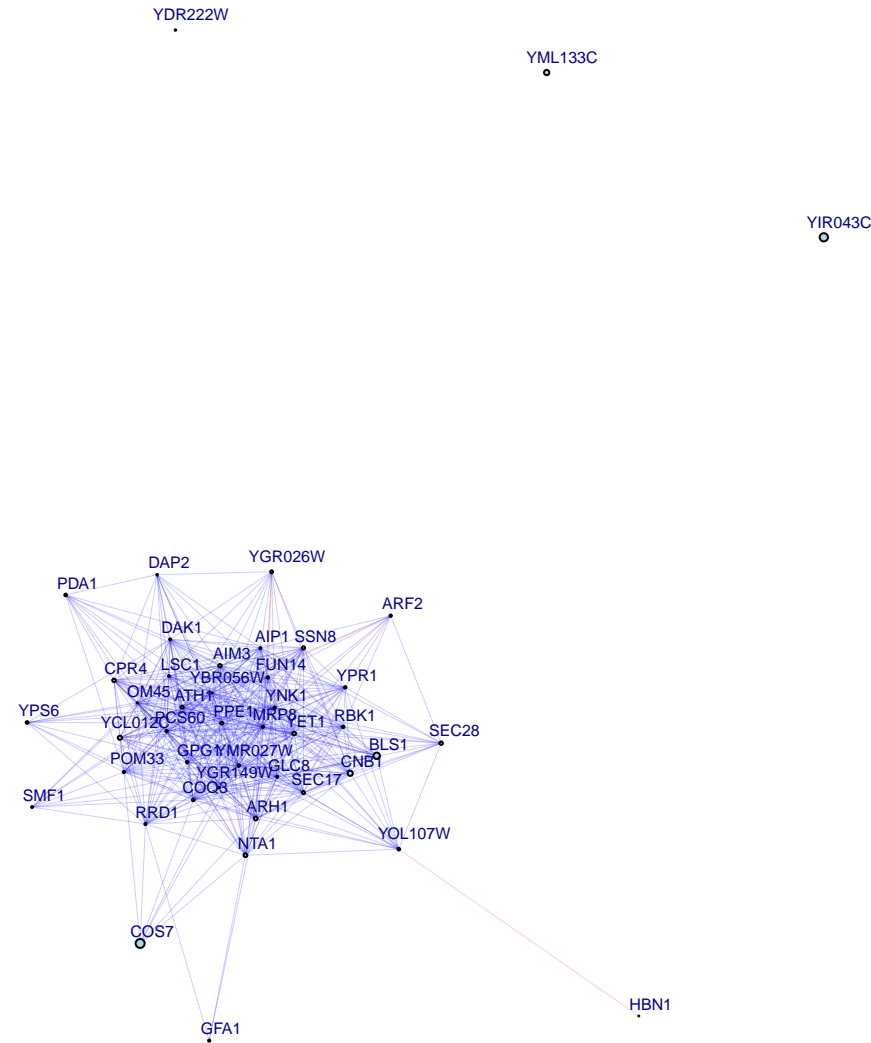

chrV:11186\_T/C top 24 down genes

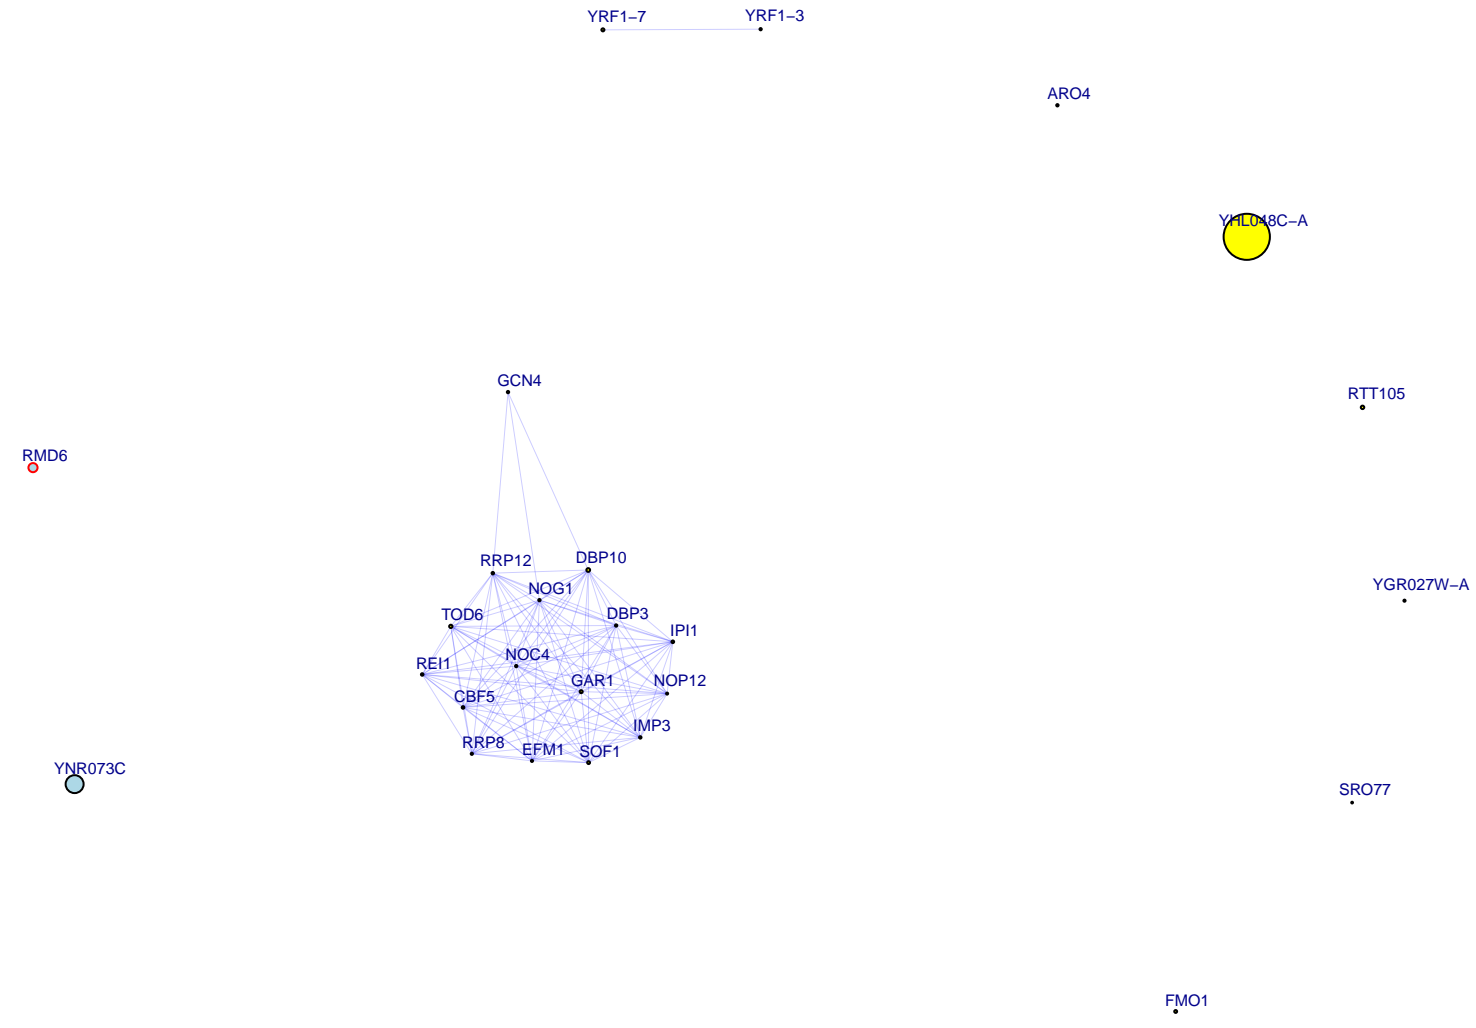

chrV:11186\_T/C top 70 up and down genes

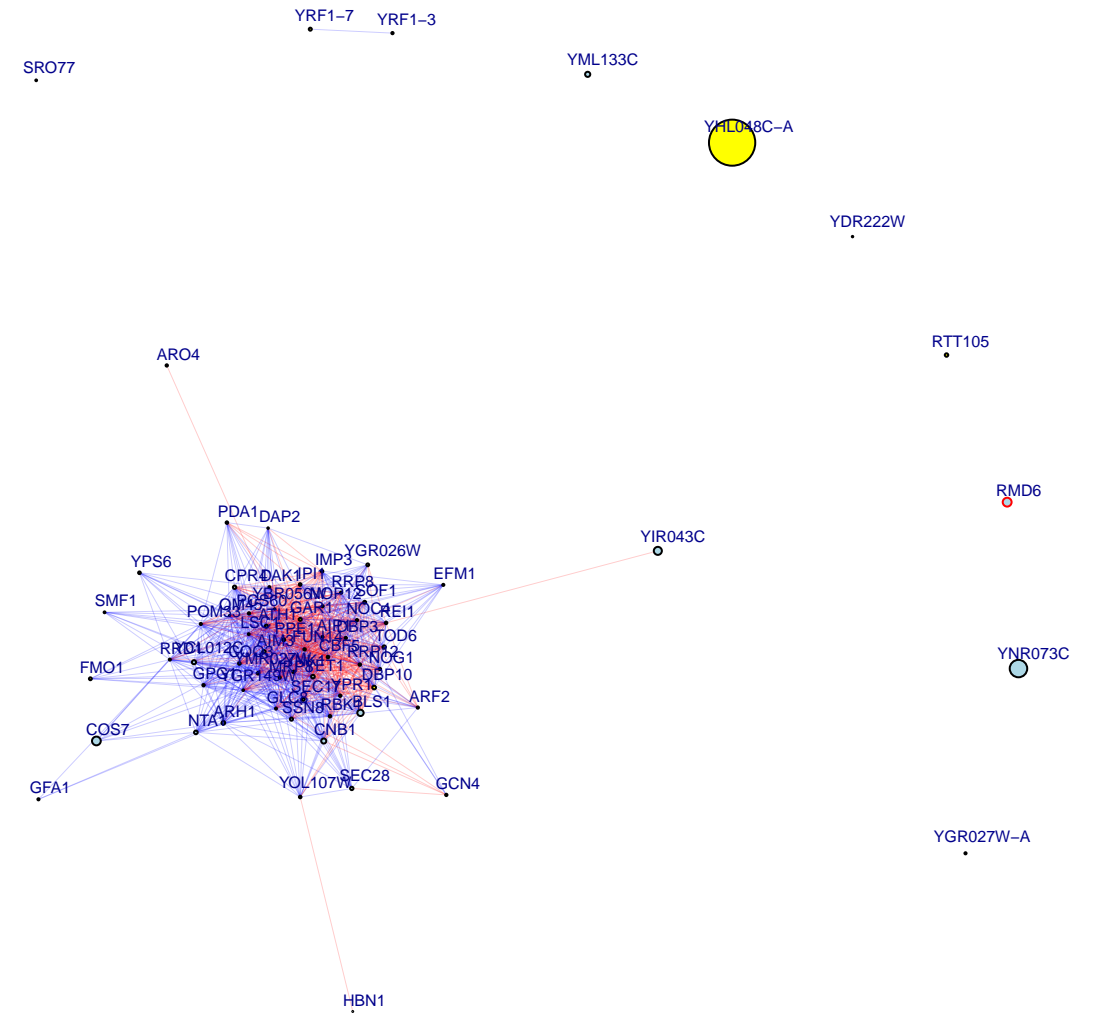

chrV:183957\_A/G top 50 up genes

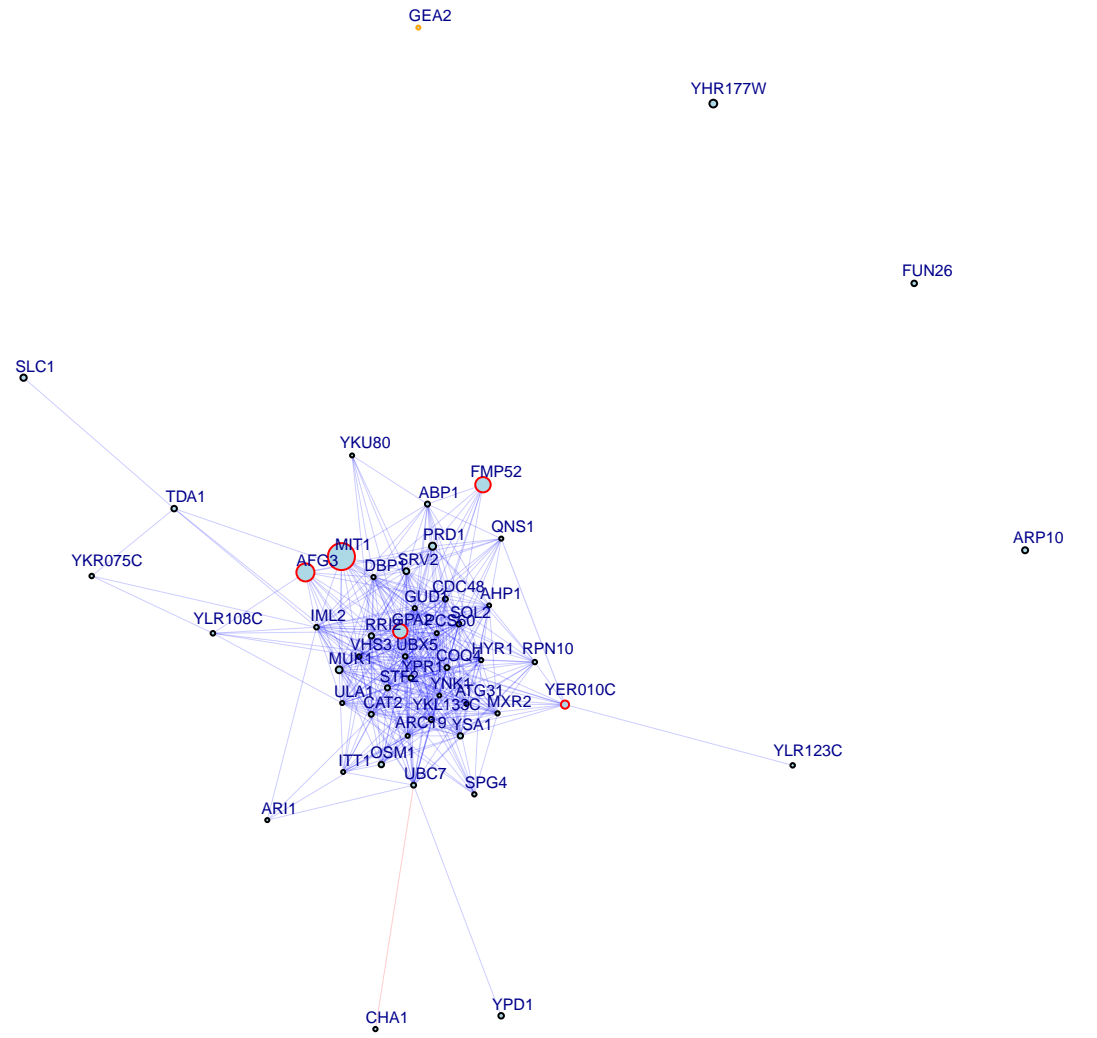

chrV:183957\_A/G top 50 down genes

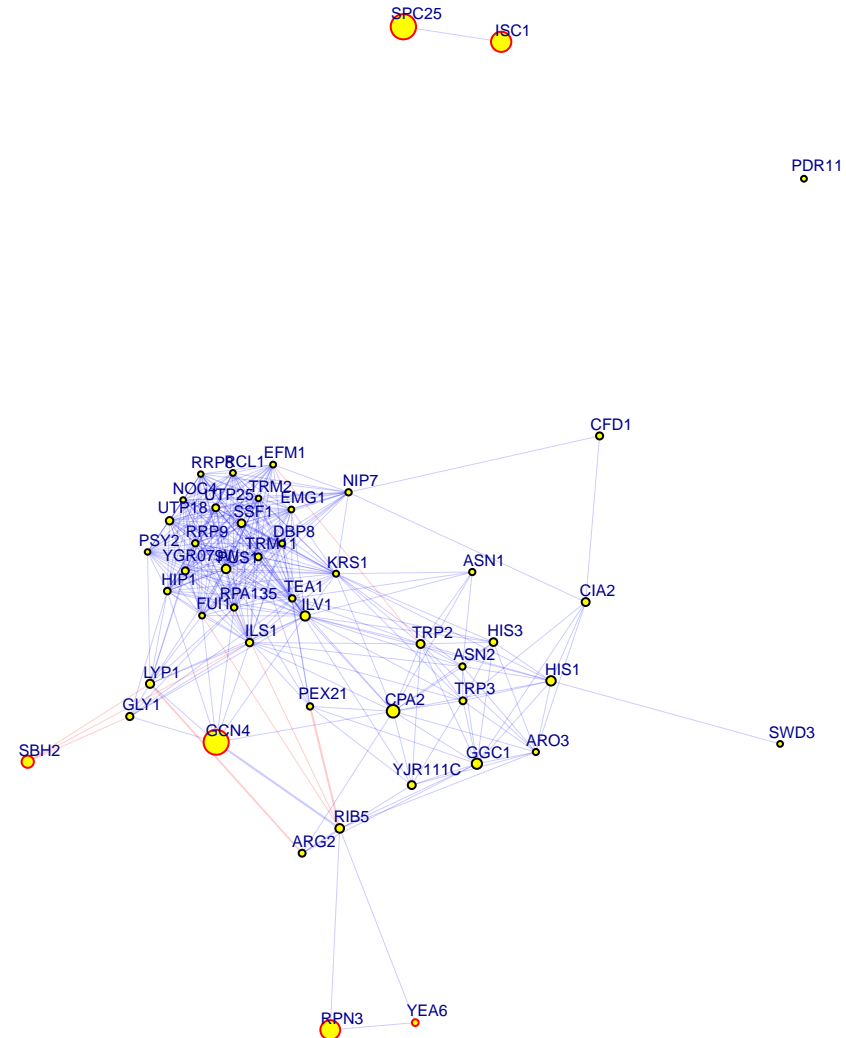

chrV:183957\_A/G top 100 up and down genes

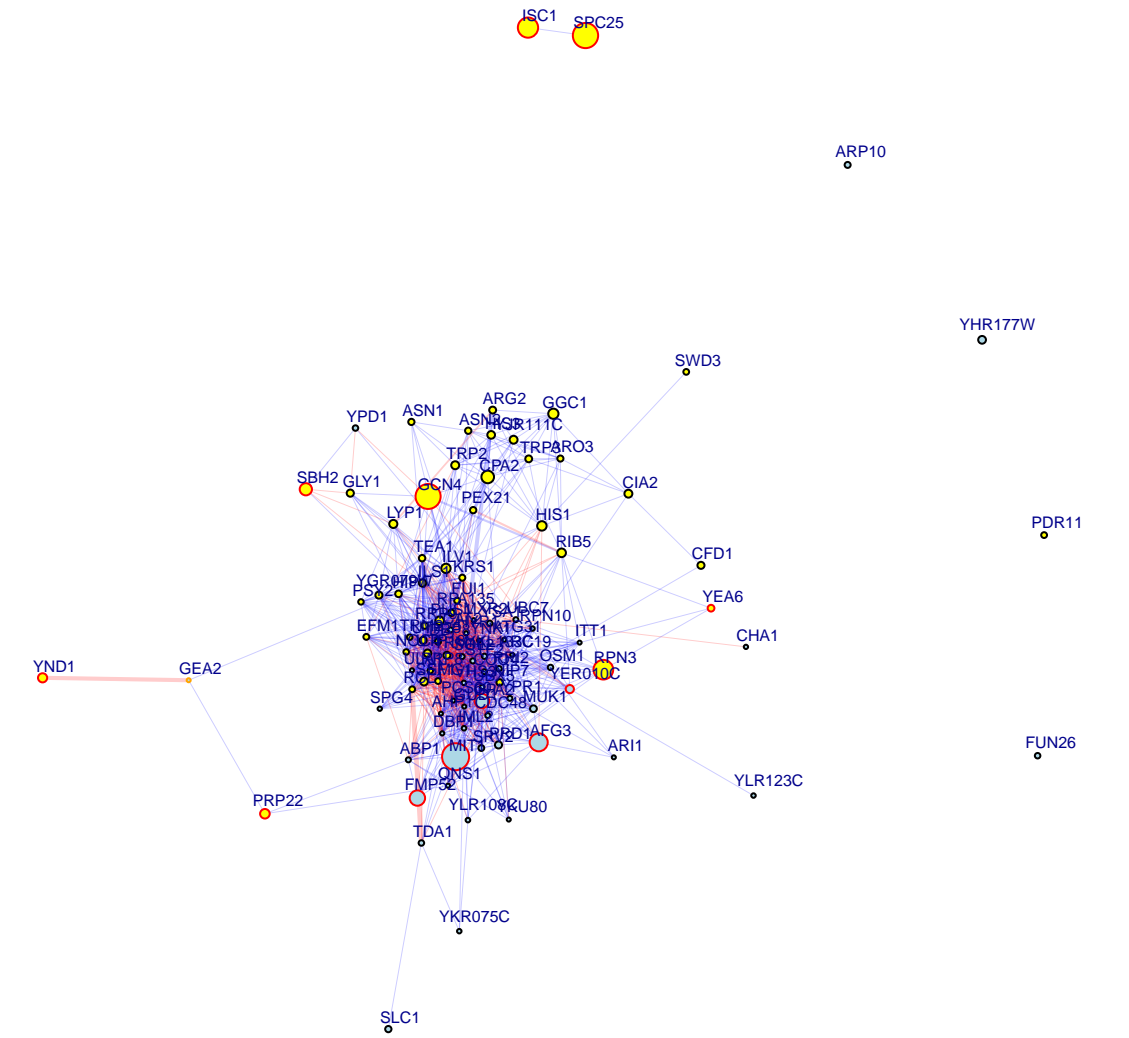



chrV:524625\_A/T top 50 up genes

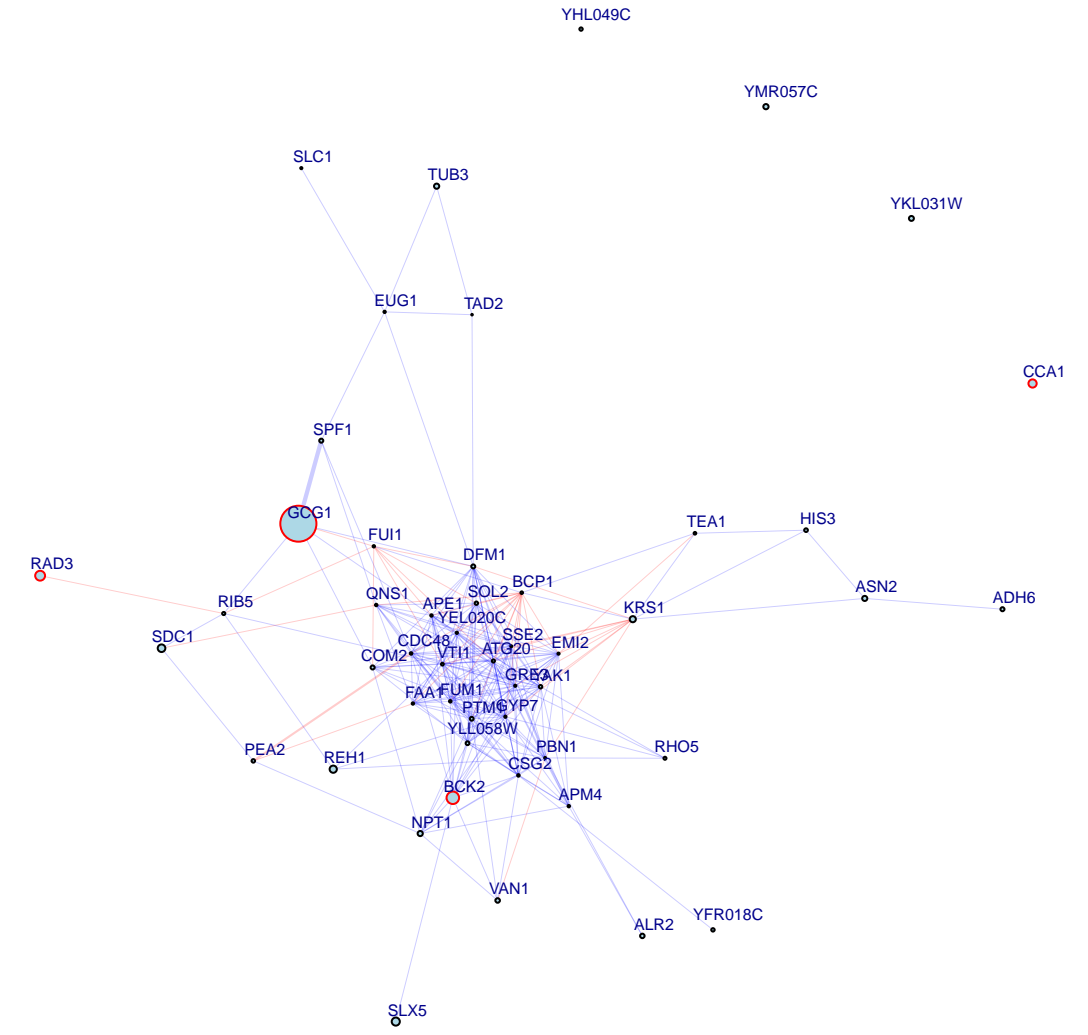

chrV:524625\_A/T top 50 down genes

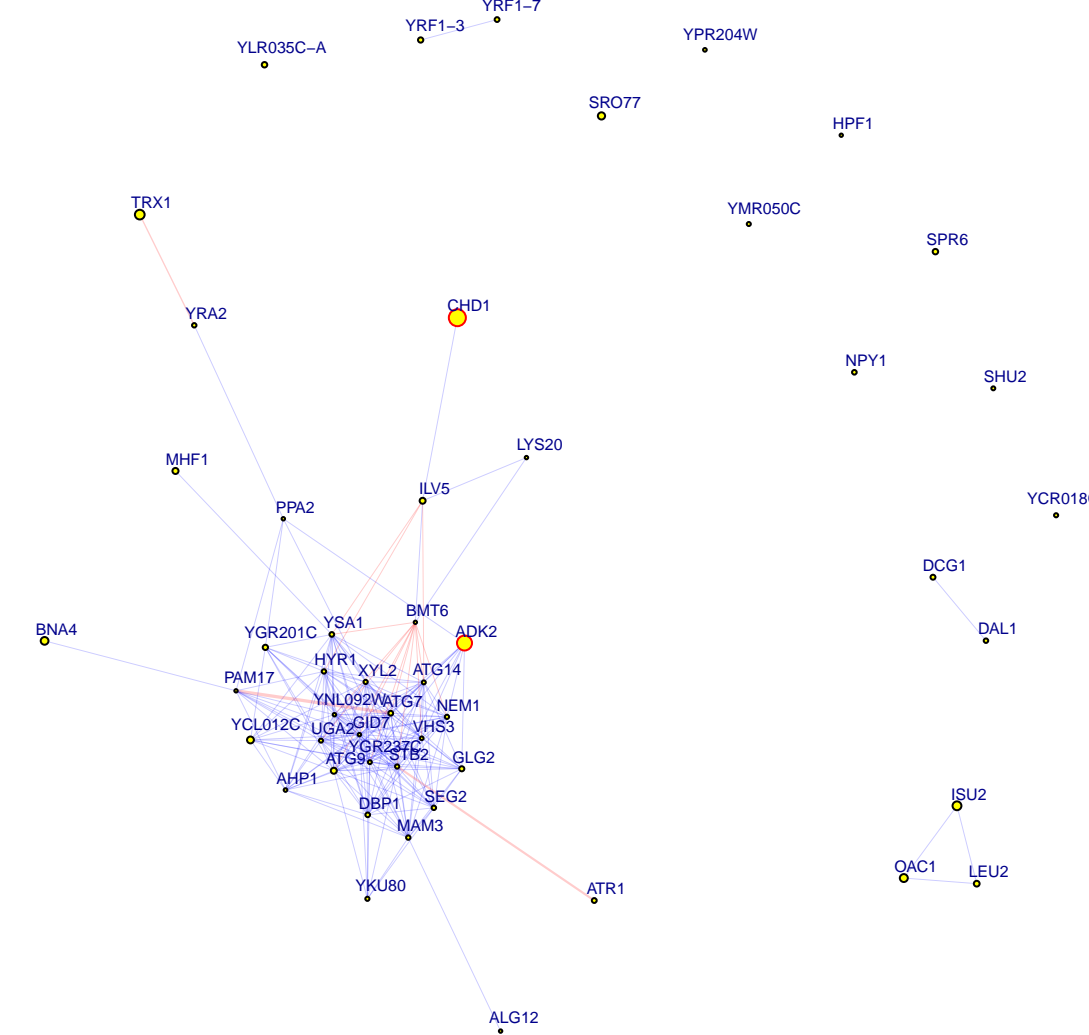

chrV:524625\_A/T top 100 up and down genes

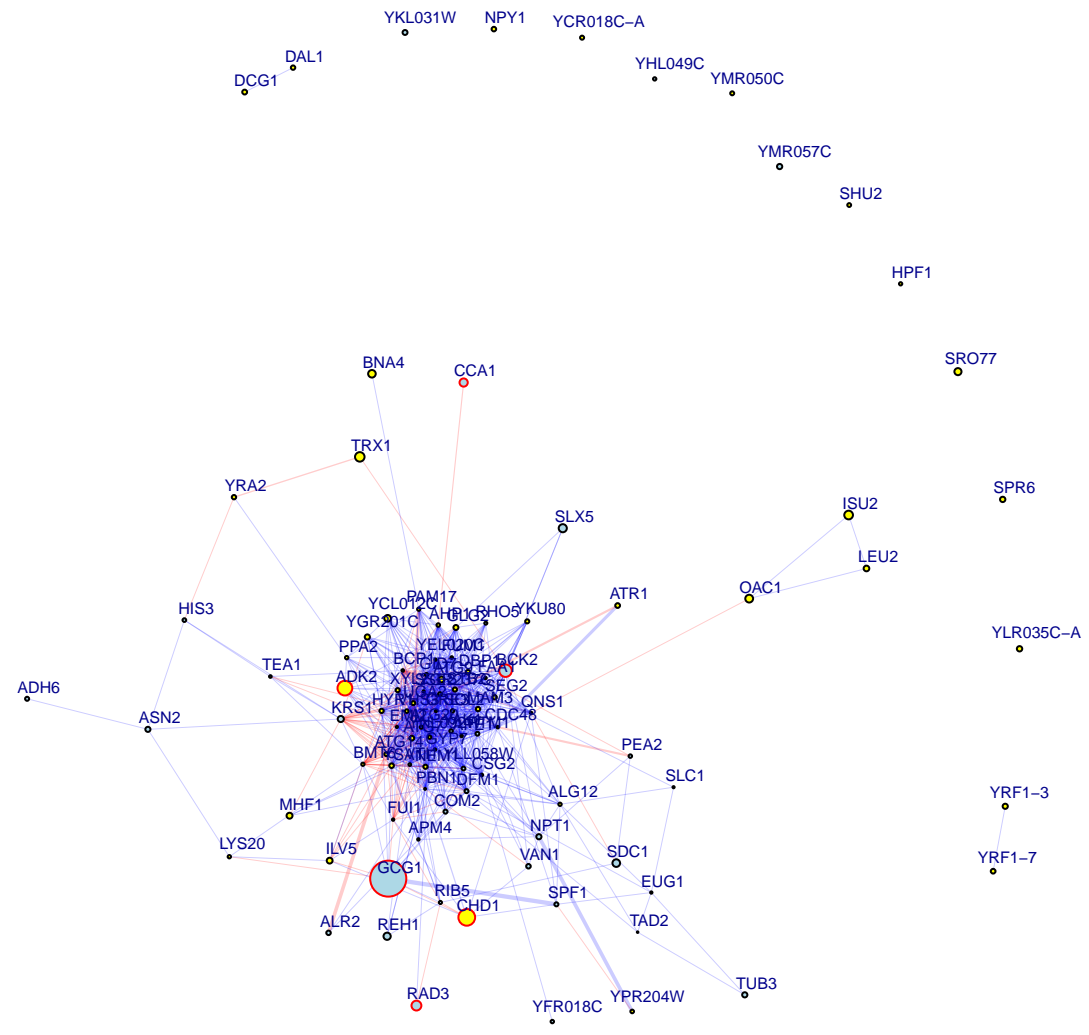

chrVI:71959\_C/T top 50 up genes

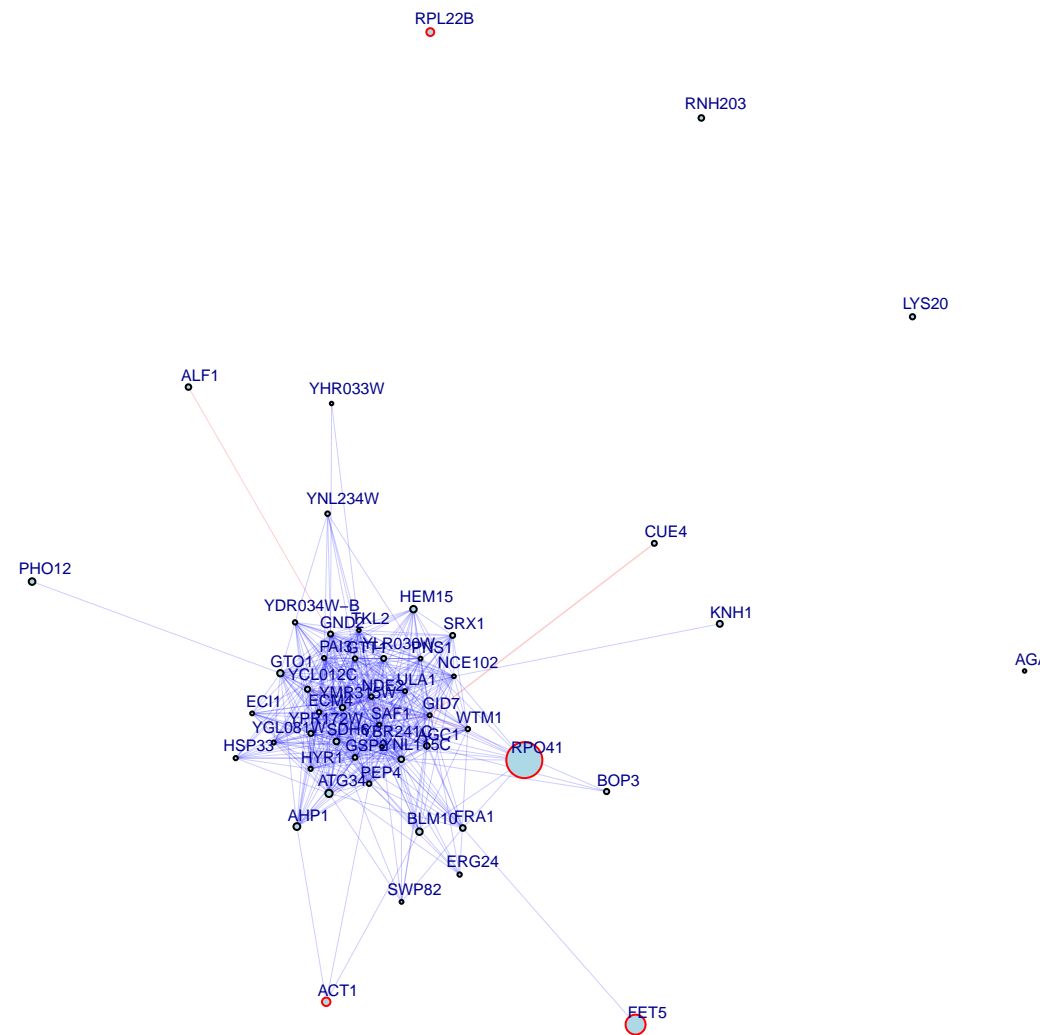

chrVI:71959\_C/T top 50 down genes

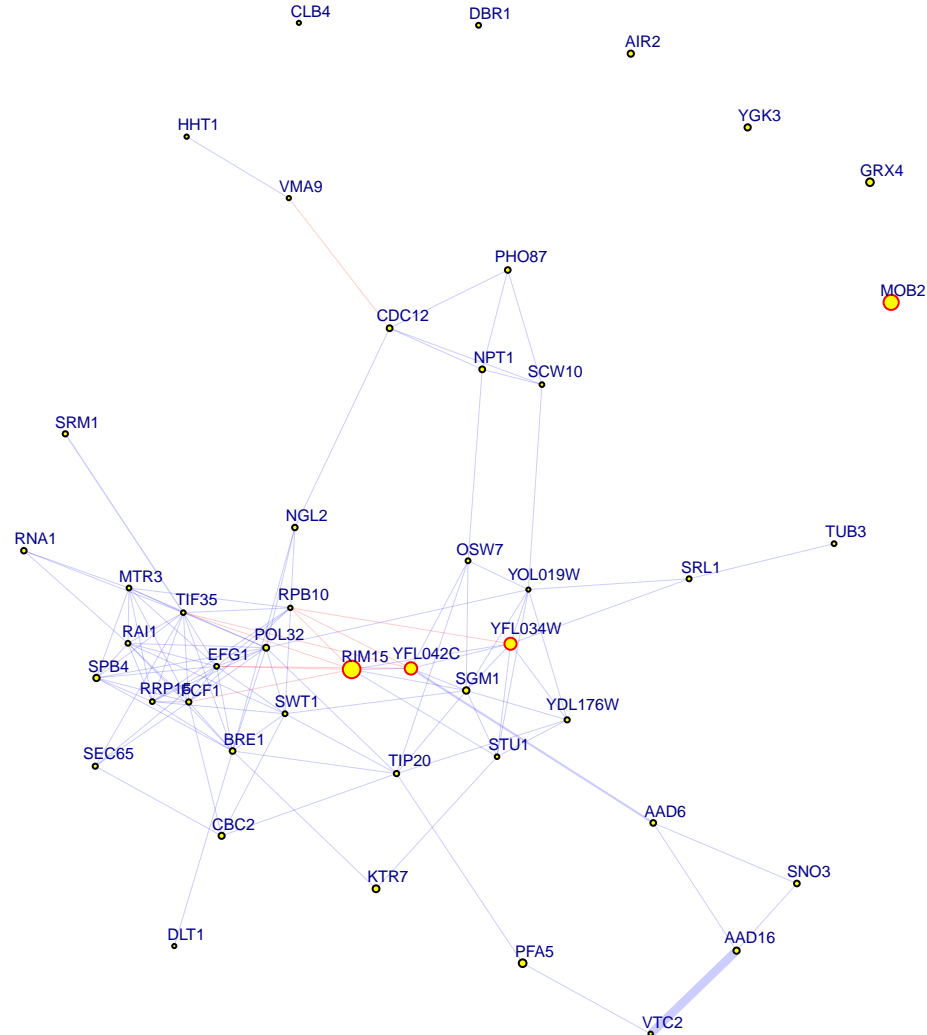

chrVI:71959\_C/T top 100 up and down genes

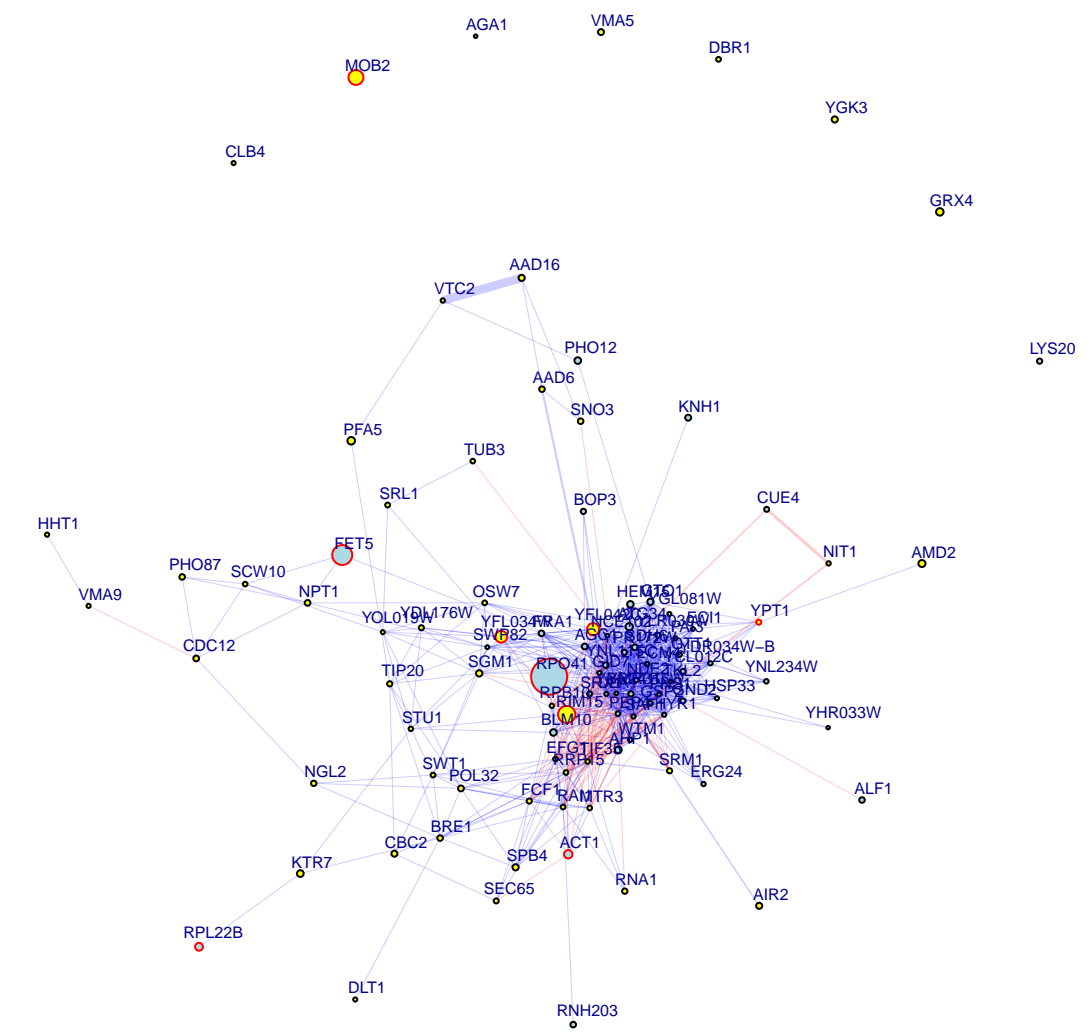



chrVI:95849\_T/C top 49 up genes

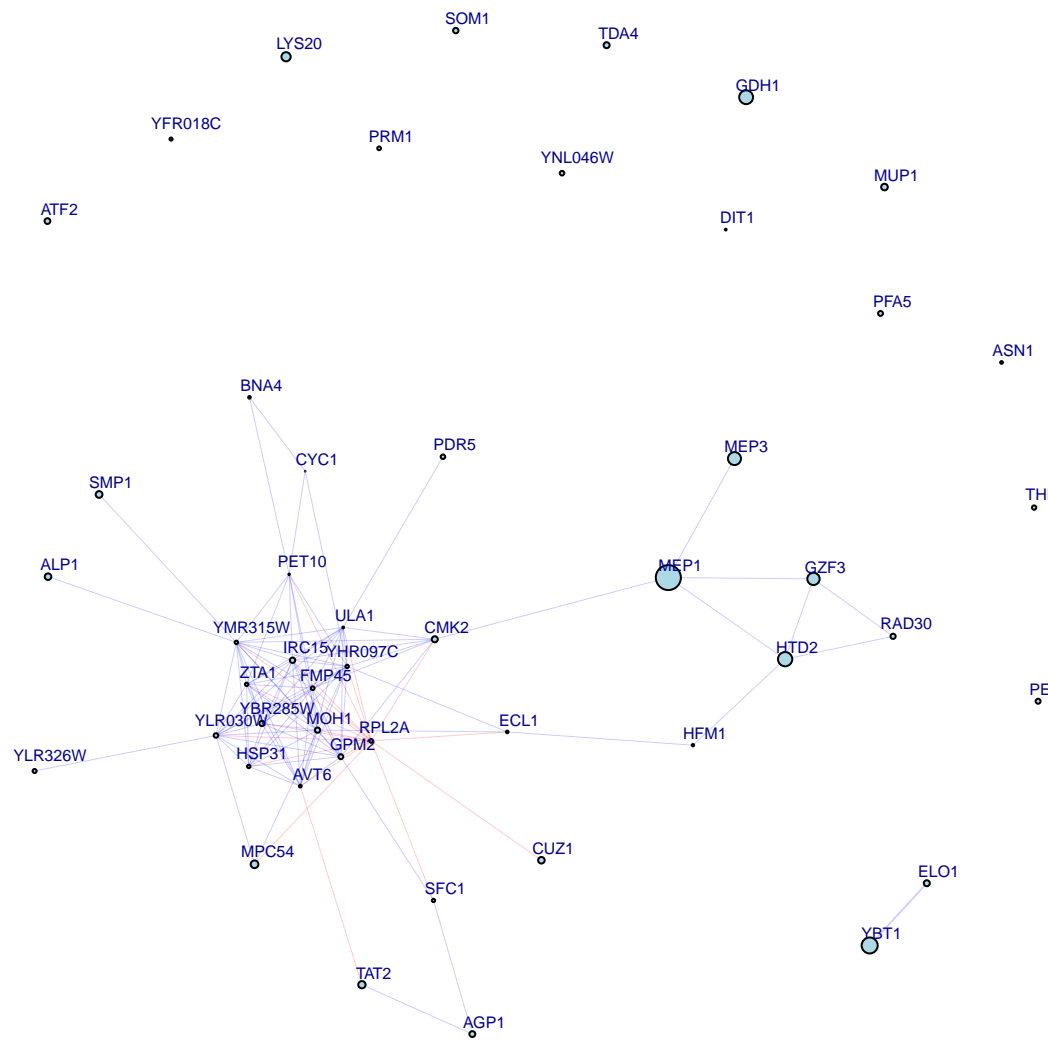

chrVI:95849\_T/C top 50 down genes

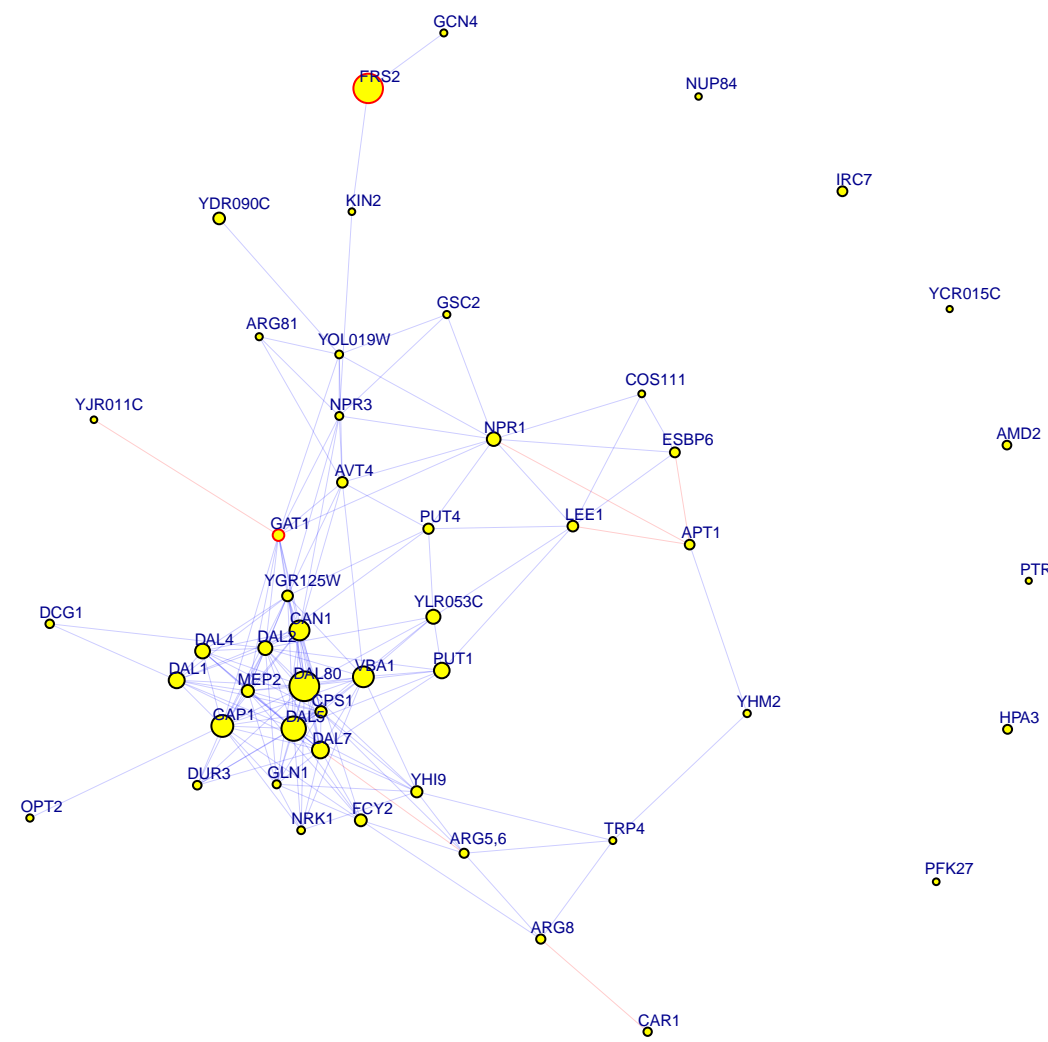

chrVI:95849\_T/C top 99 up and down genes

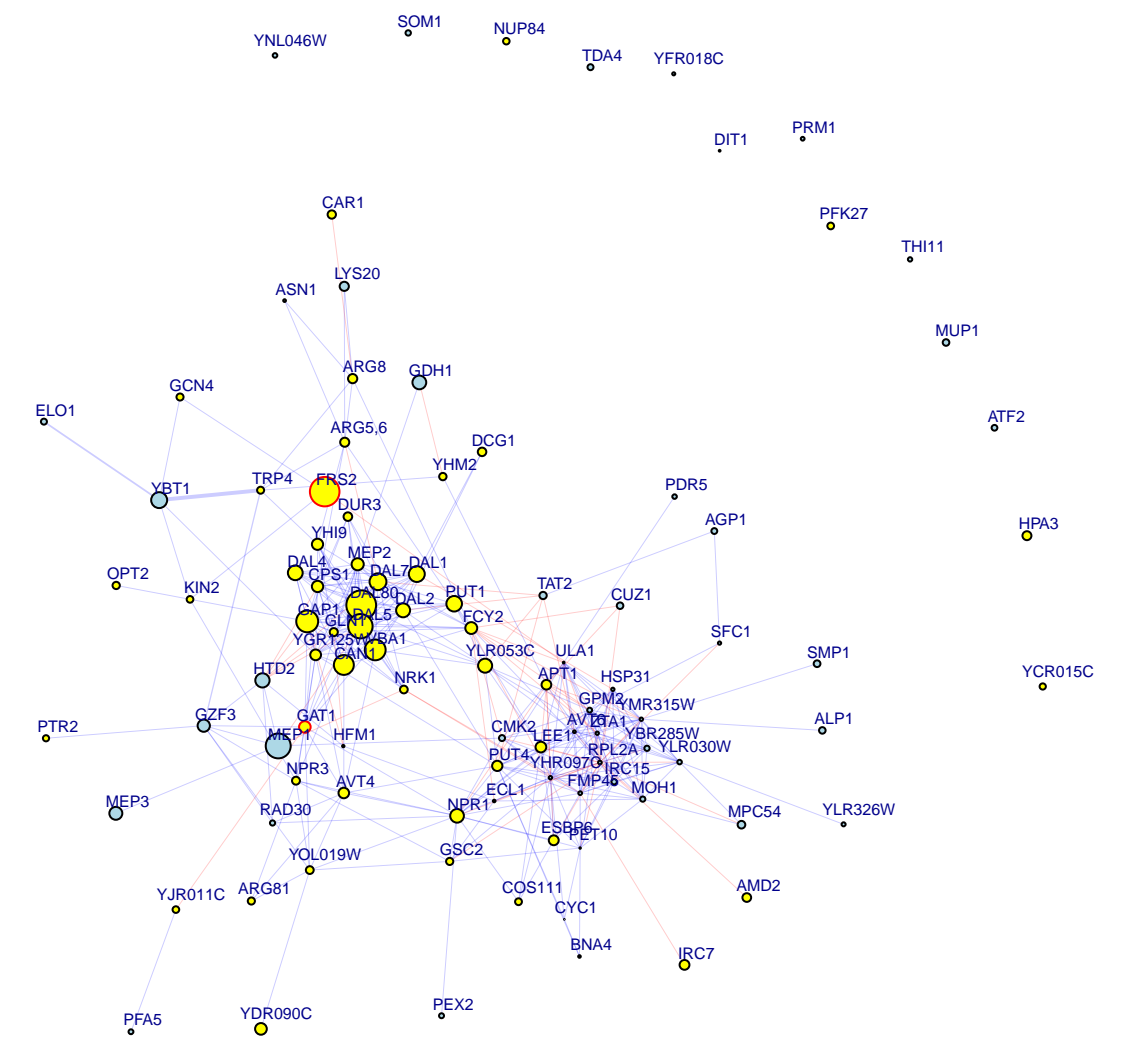



chrVI:229337\_G/A top 16 up genes

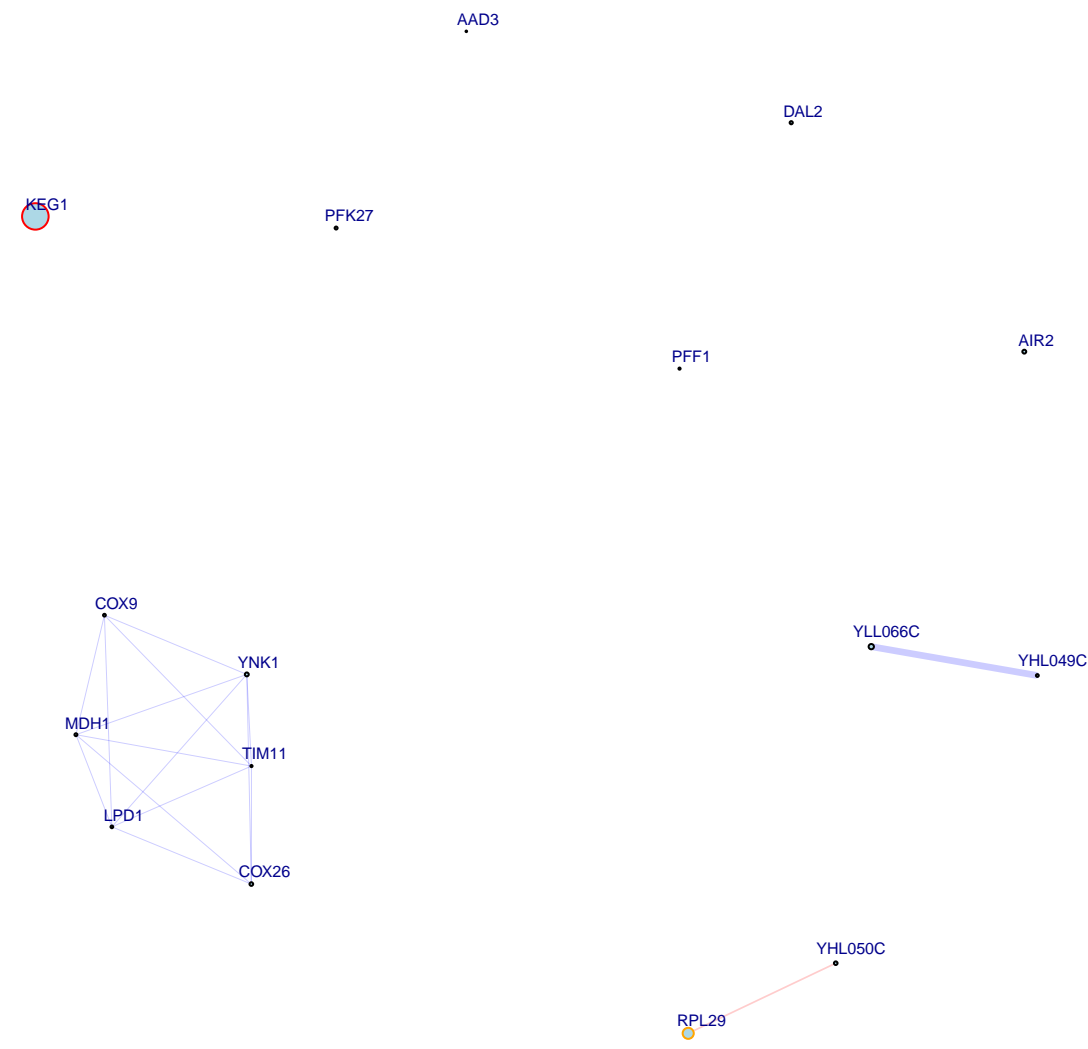

chrVI:229337\_G/A top 50 down genes

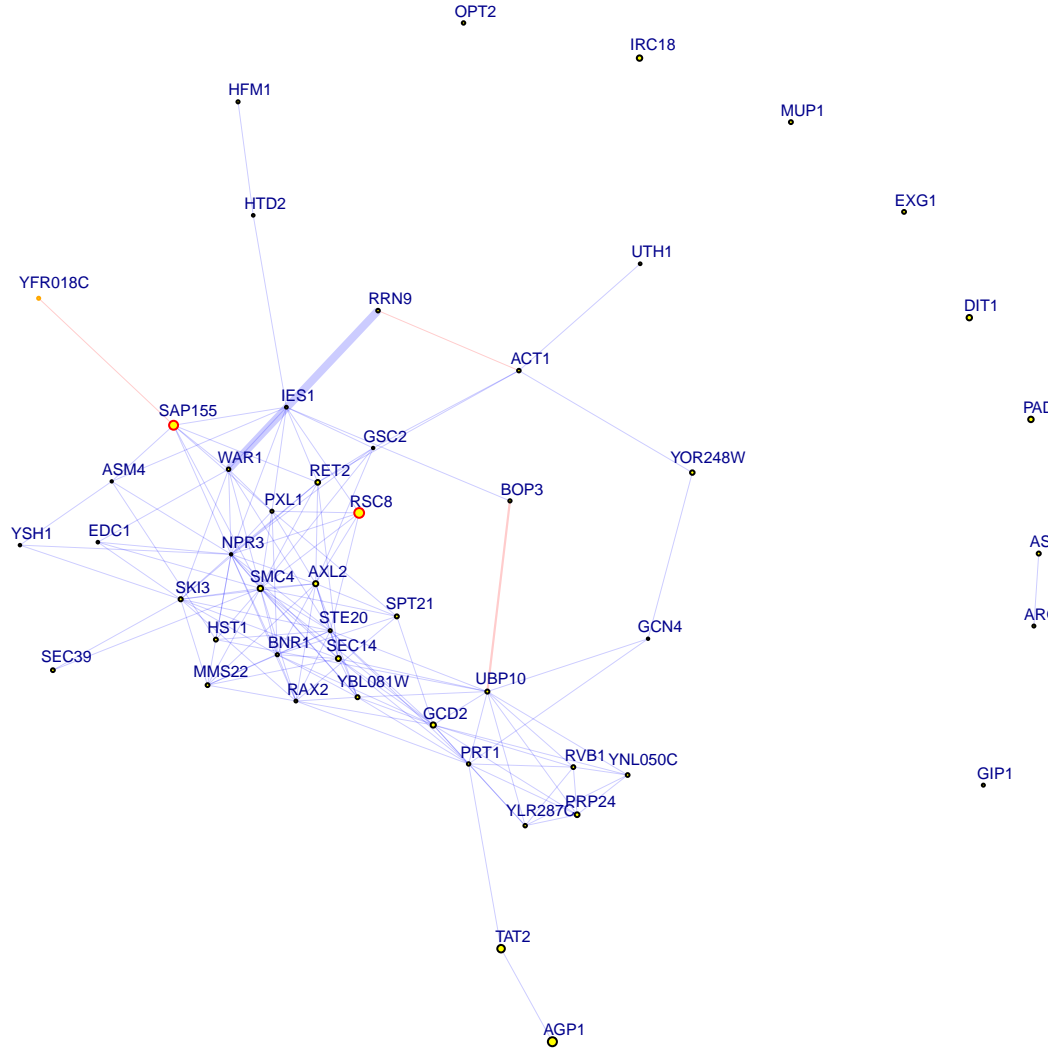

chrVI:229337\_G/A top 66 up and down genes

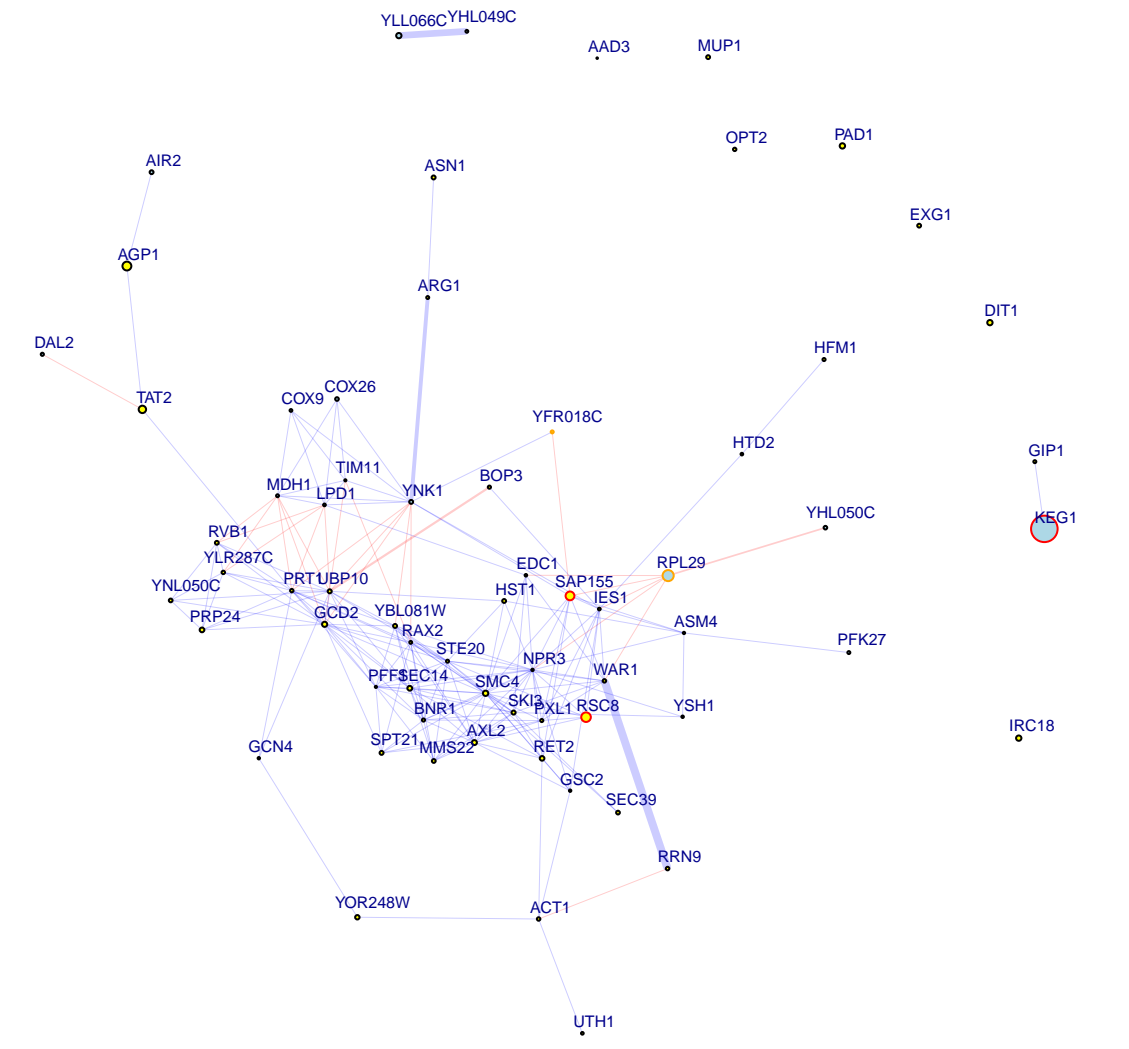



chrVII:141743\_C/T top 50 up genes

chrVII:141743\_C/T top 50 down genes

chrVII:141743\_C/T top 100 up and down genes

ALP1

YGL193C

YGL193C

ALP1

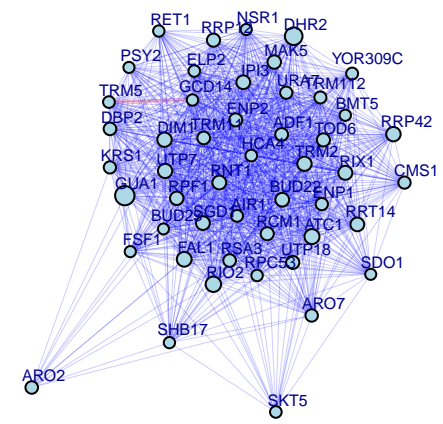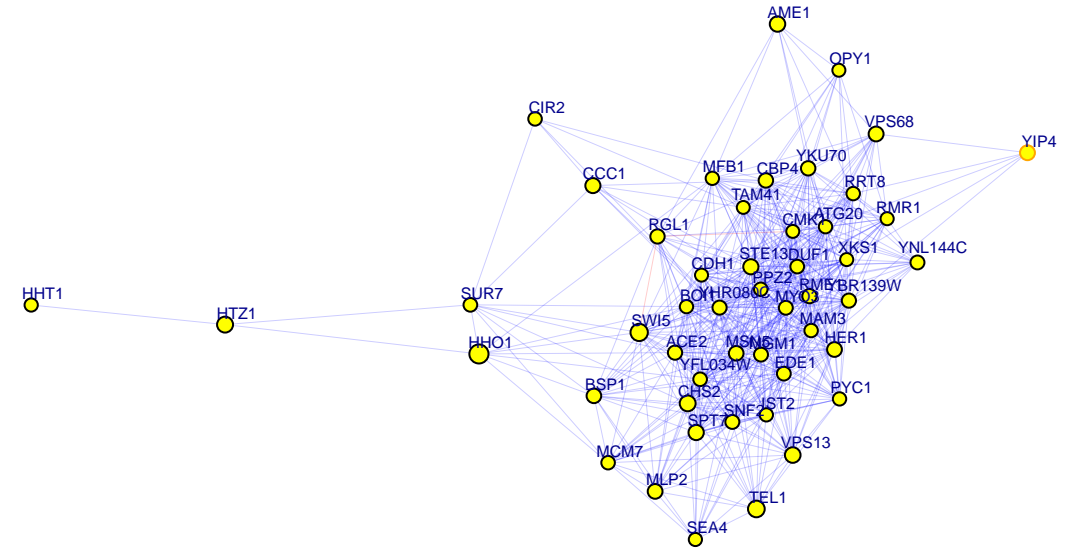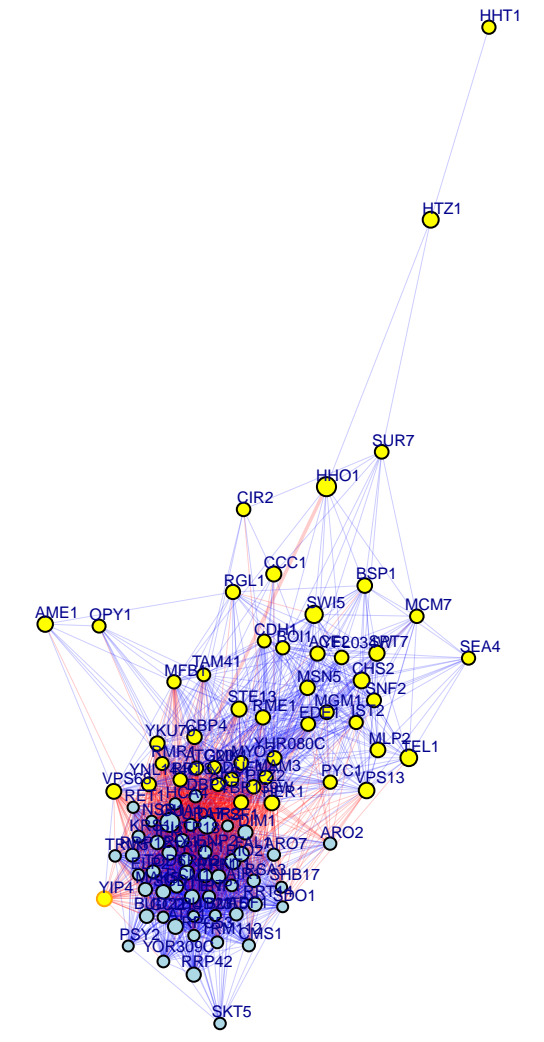

chrVII:178509\_T/C top 50 up genes

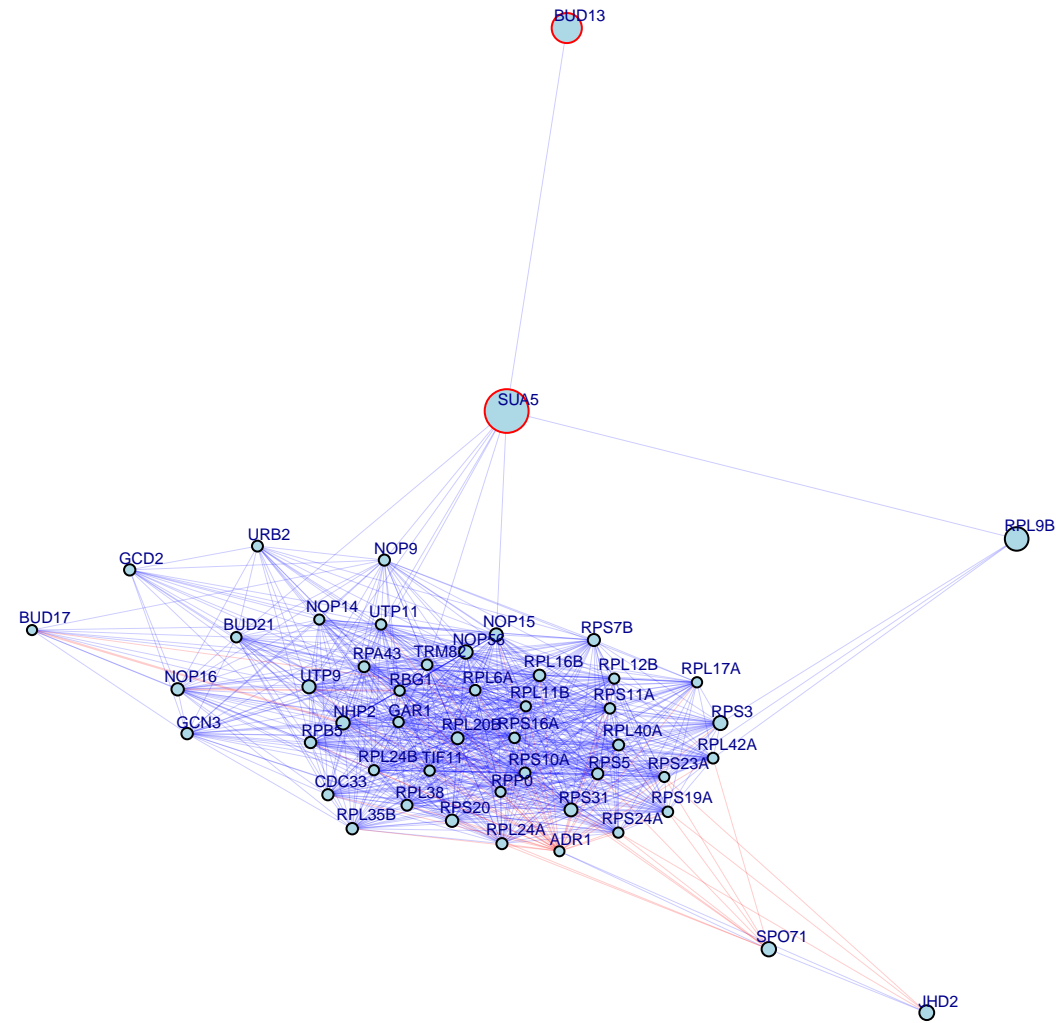

chrVII:178509\_T/C top 50 down genes

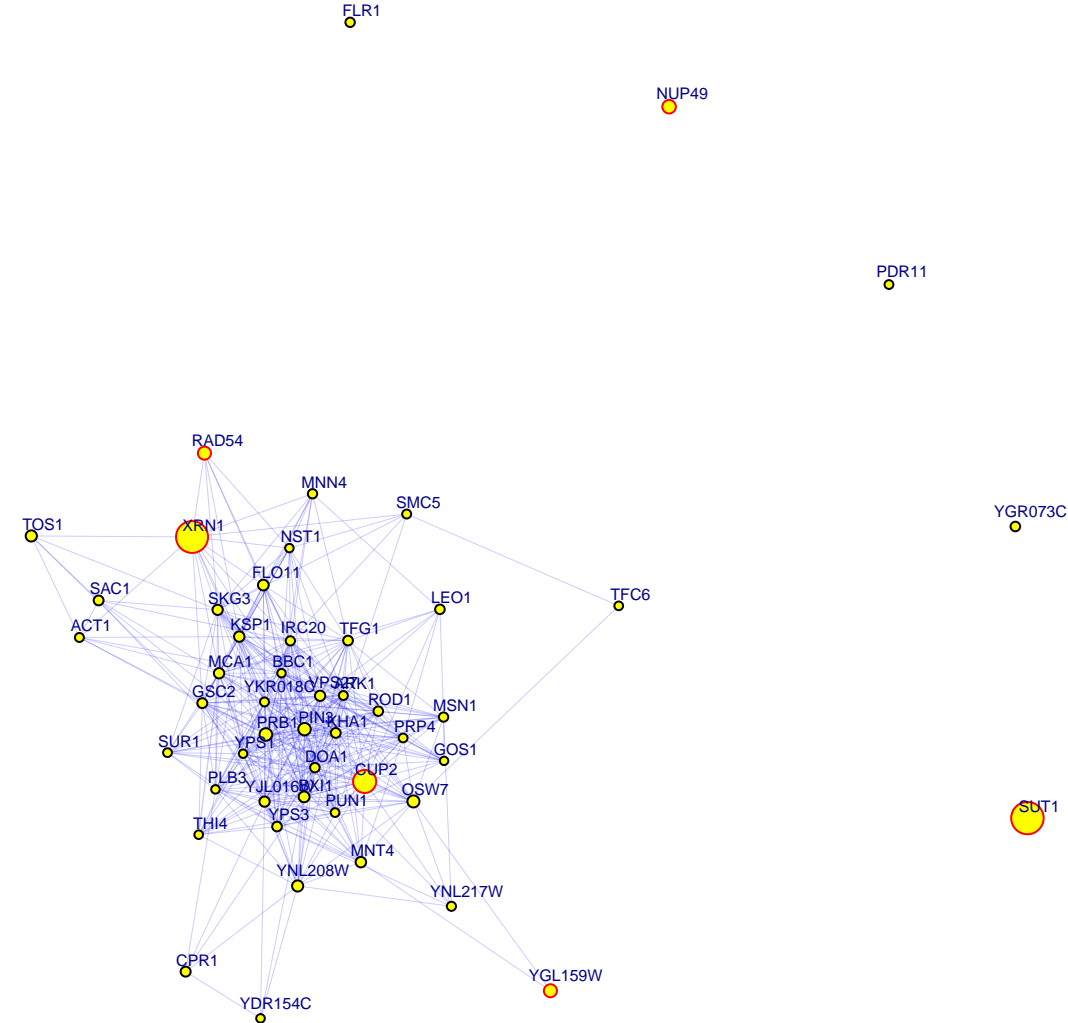

chrVII:178509\_T/C top 100 up and down genes

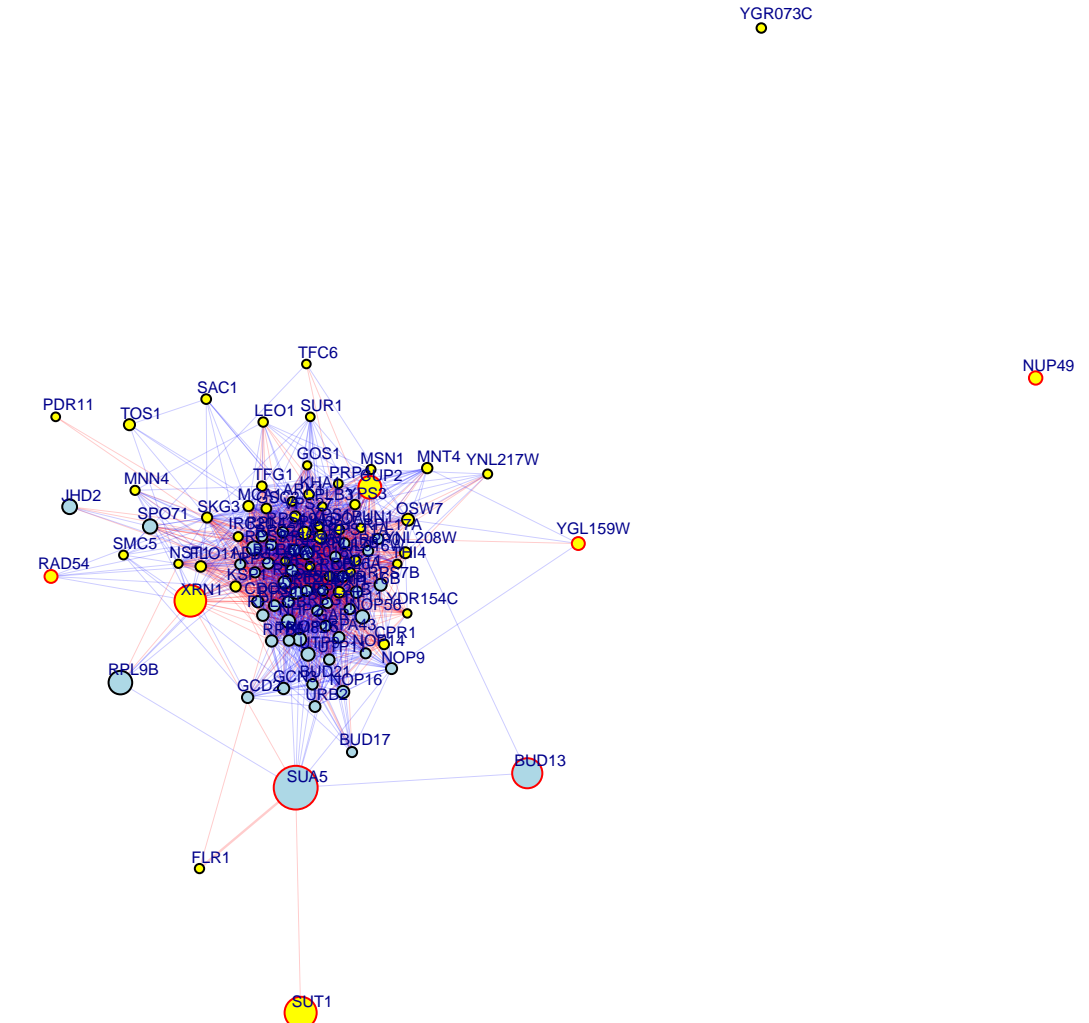

chrVII:372033\_G/C top 50 up genes

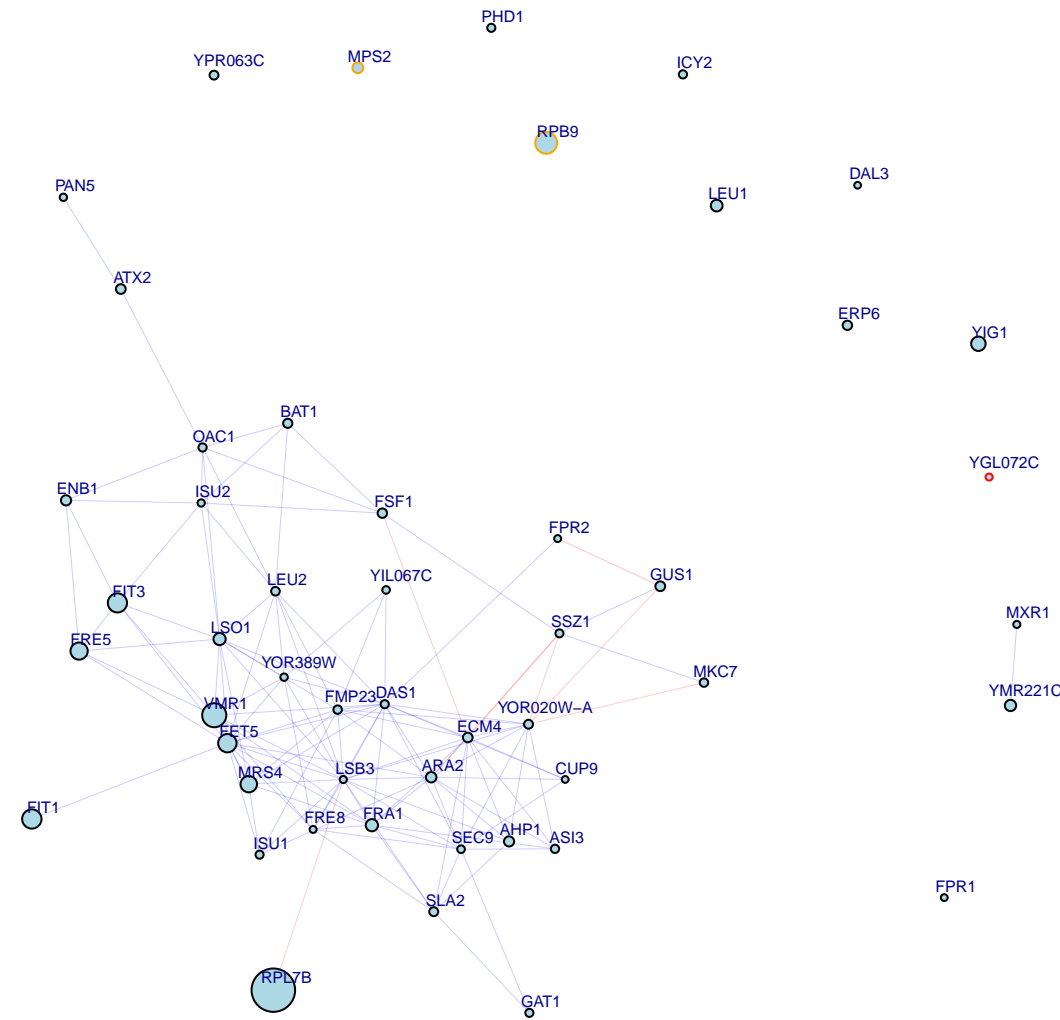

chrVII:372033\_G/C top 50 down genes

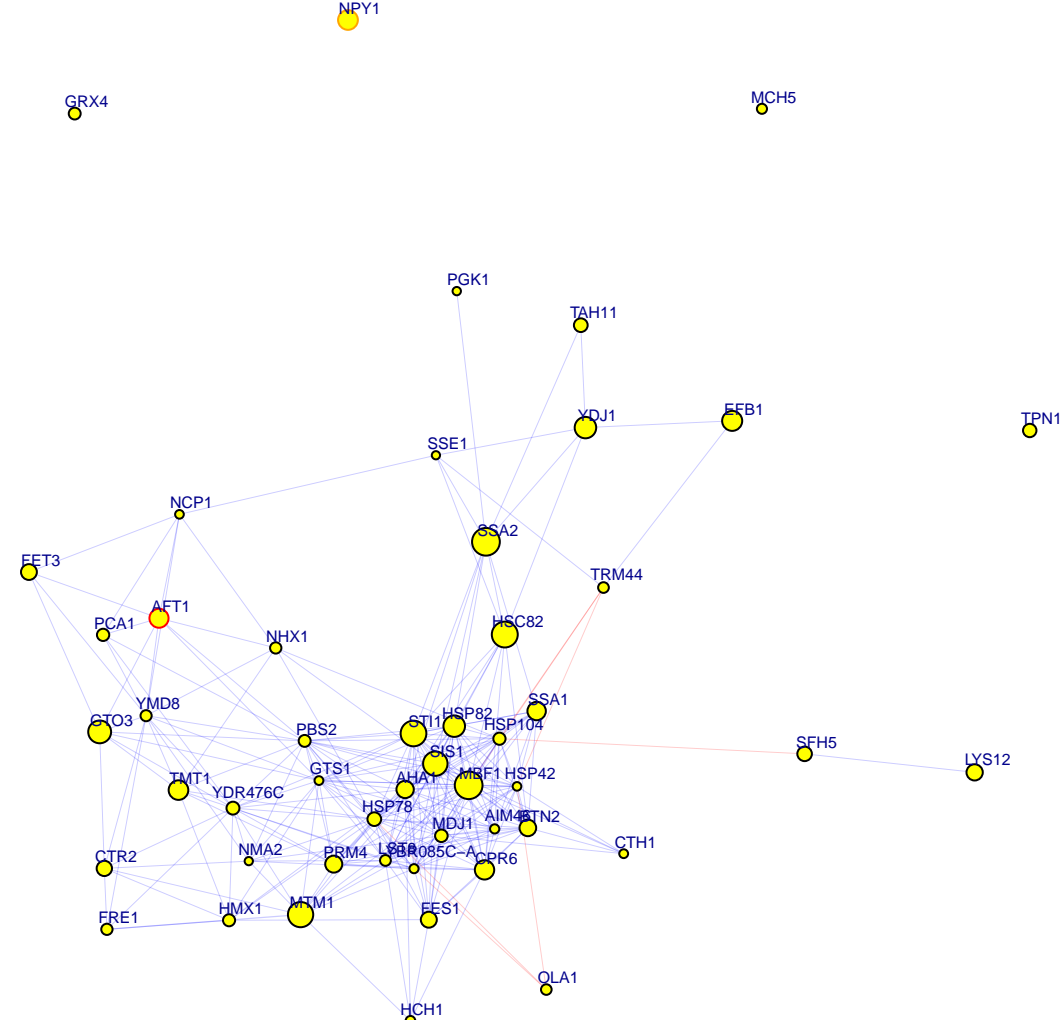

chrVII:372033\_G/C top 100 up and down genes

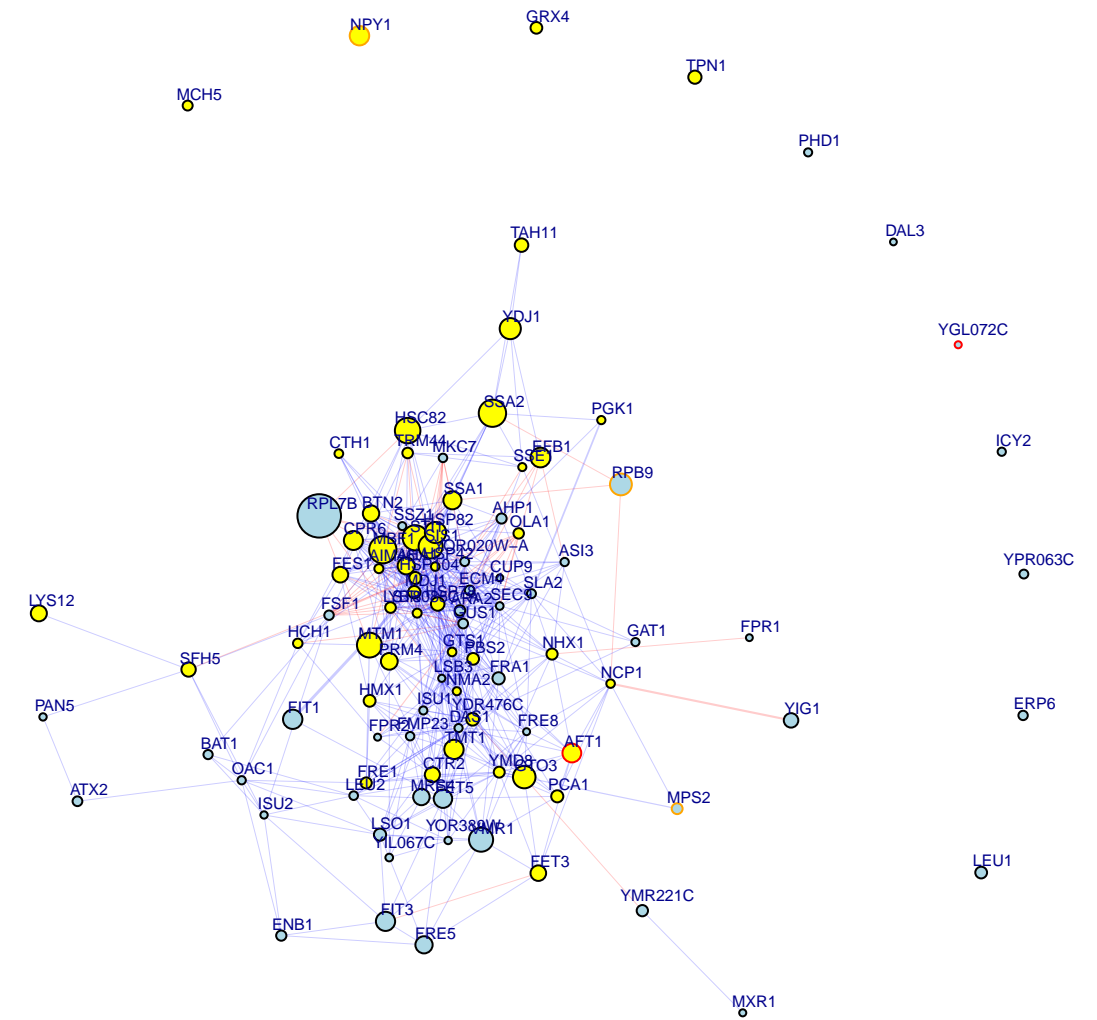

chrVII:397449\_G/A top 50 up genes

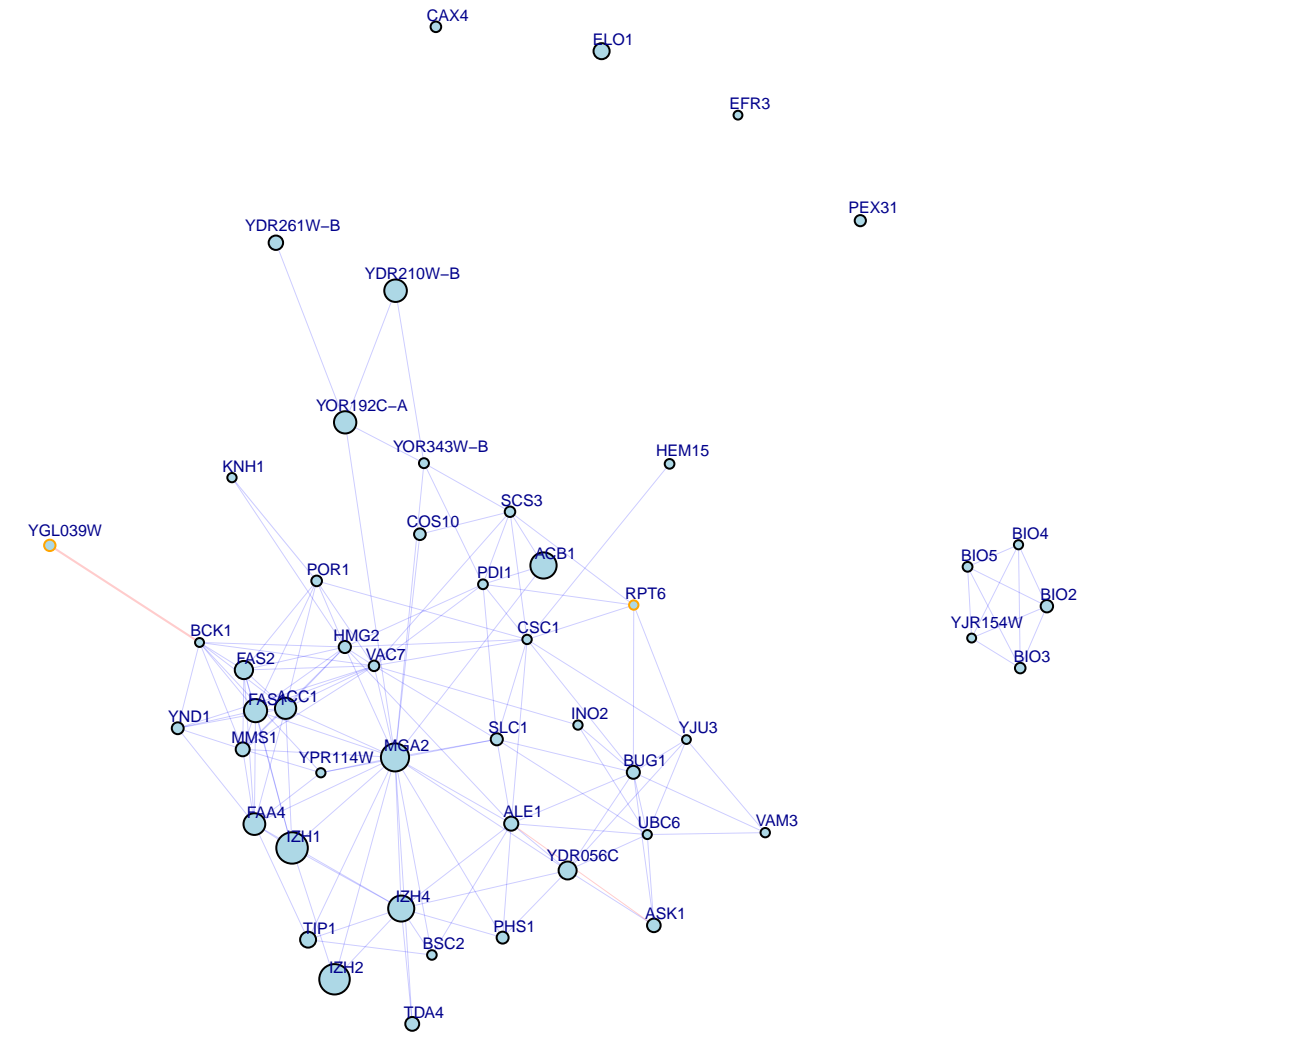

chrVII:397449\_G/A top 50 down genes

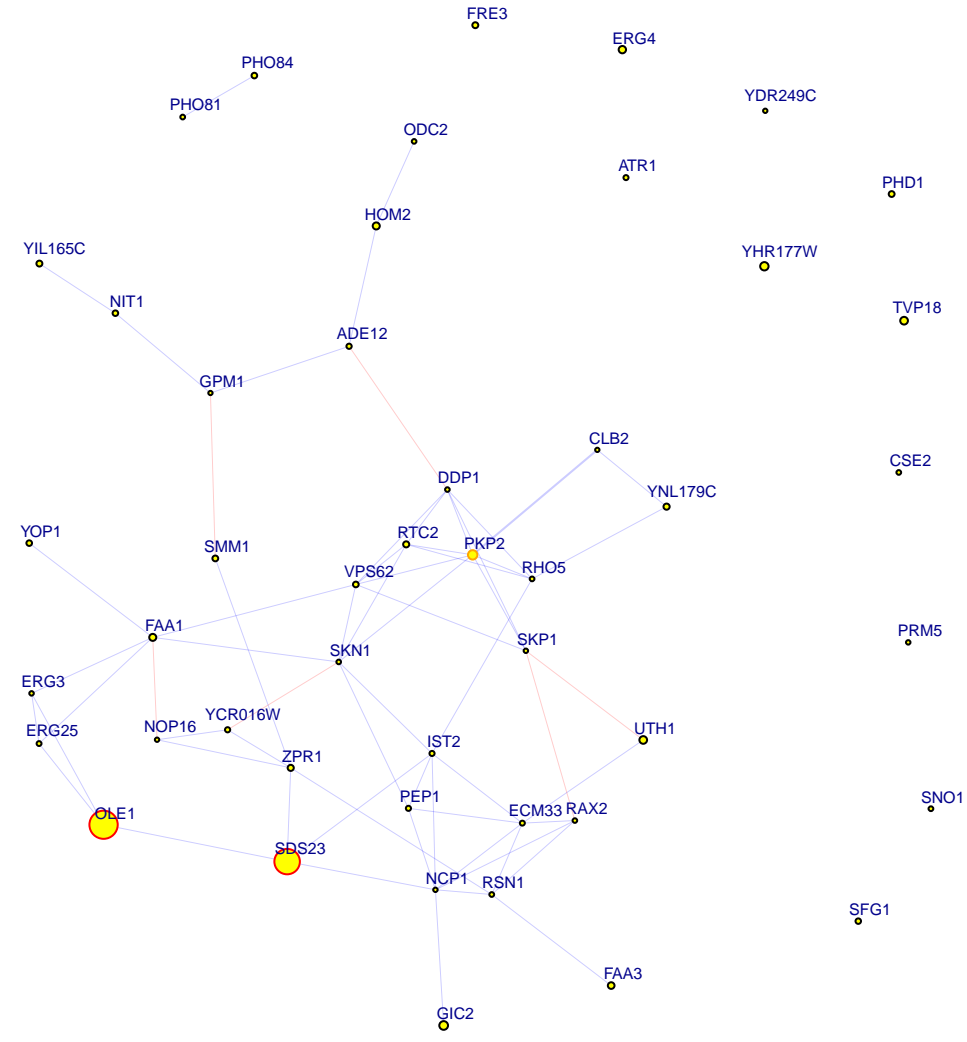

chrVII:397449\_G/A top 100 up and down genes

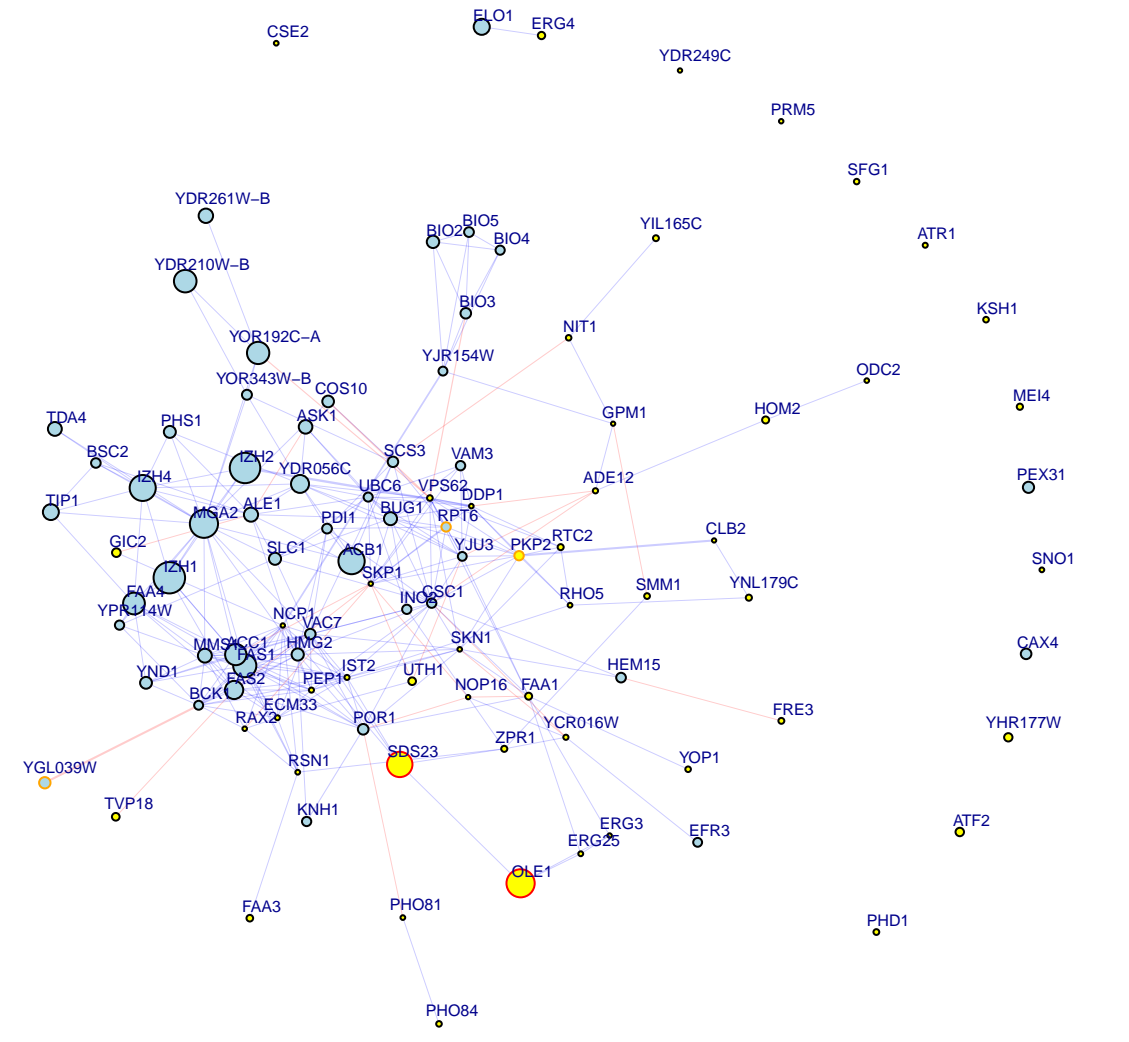



chrVII:470028\_A/G top 50 up genes

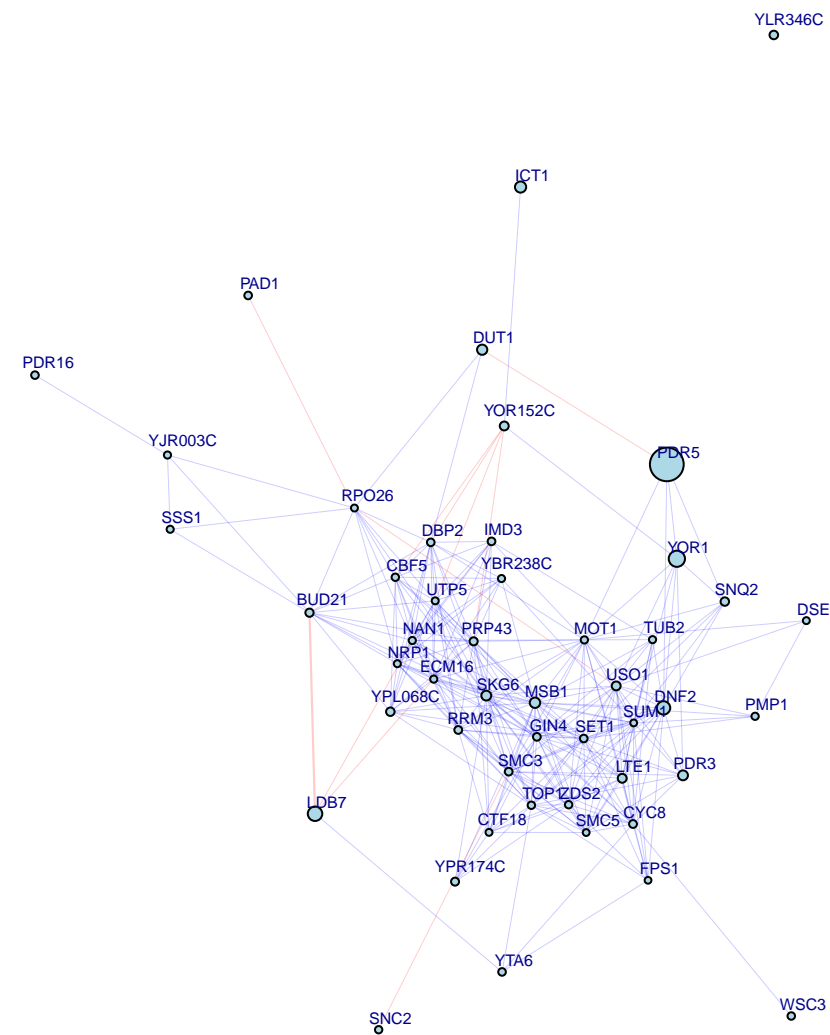

chrVII:470028\_A/G top 50 down genes

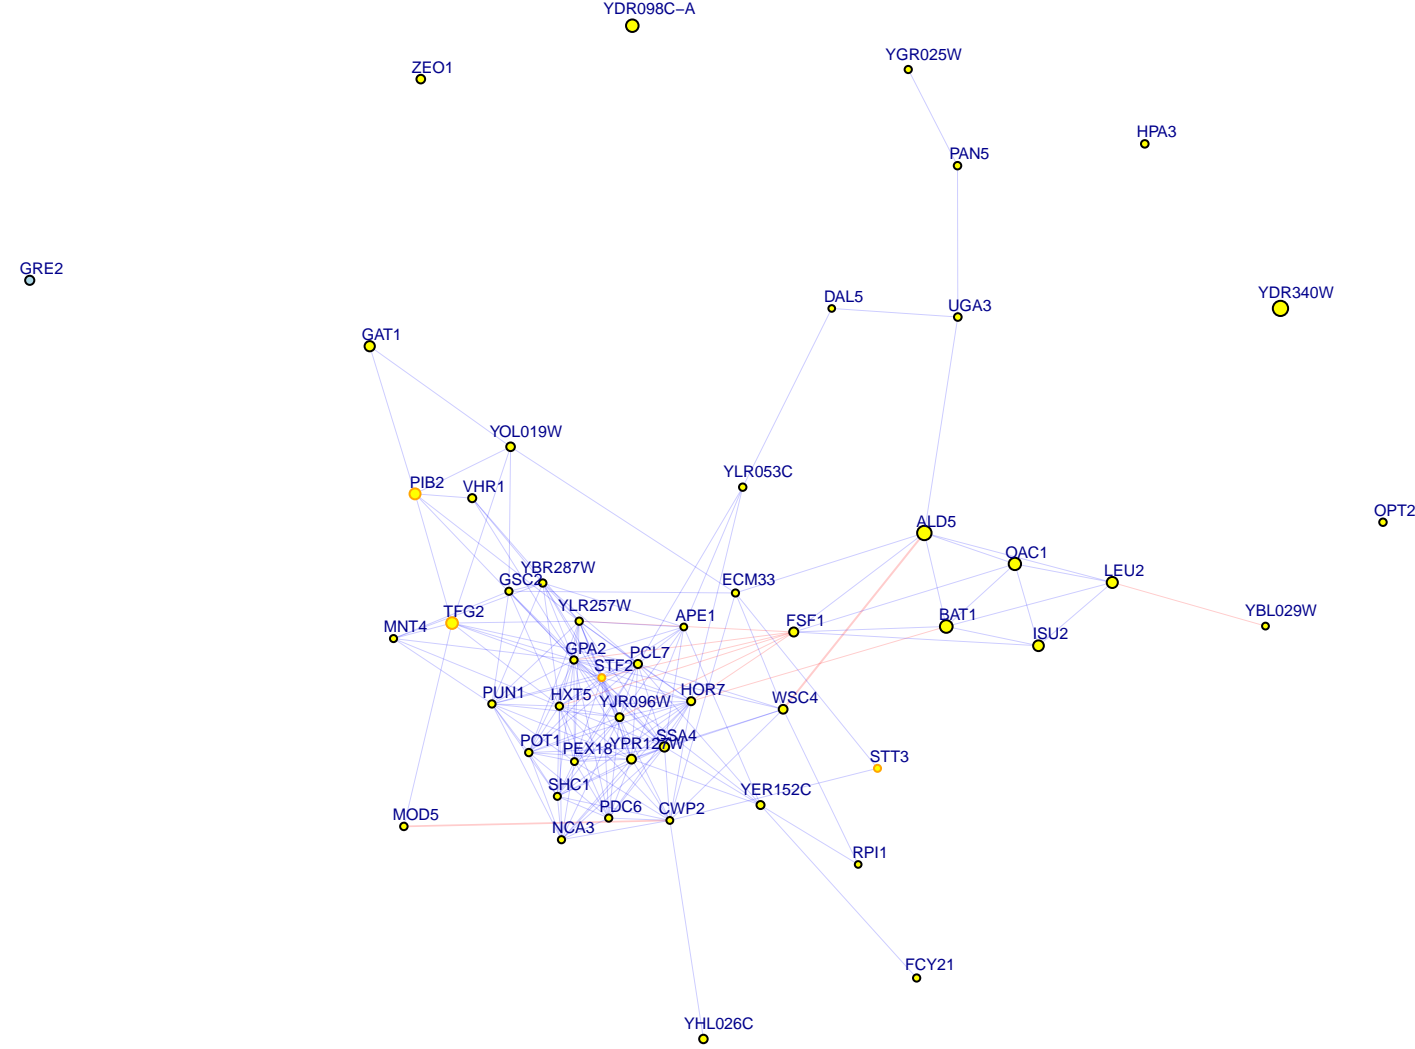

chrVII:470028\_A/G top 100 up and down genes

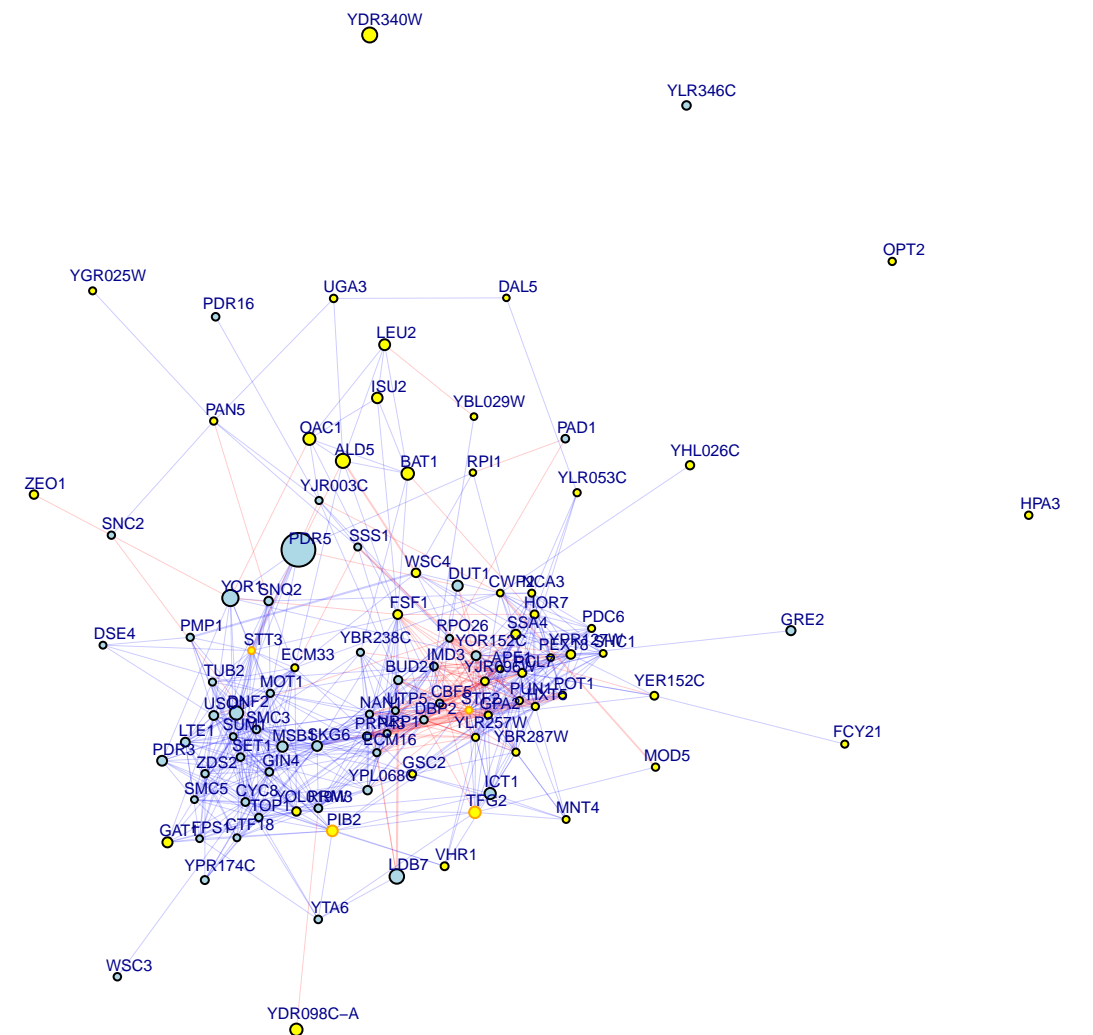

chrVII:656248\_T/G top 50 up genes

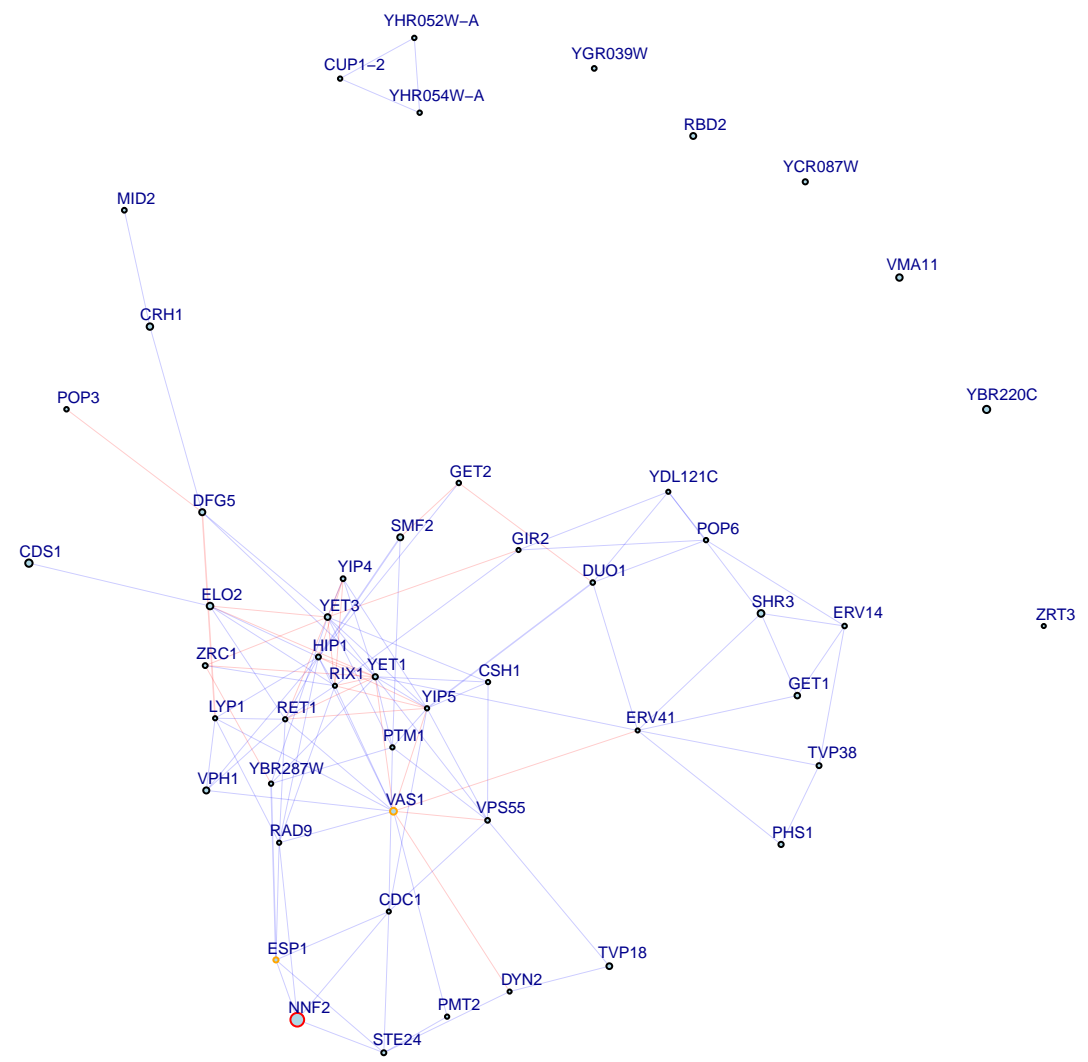

chrVII:656248\_T/G top 50 down genes

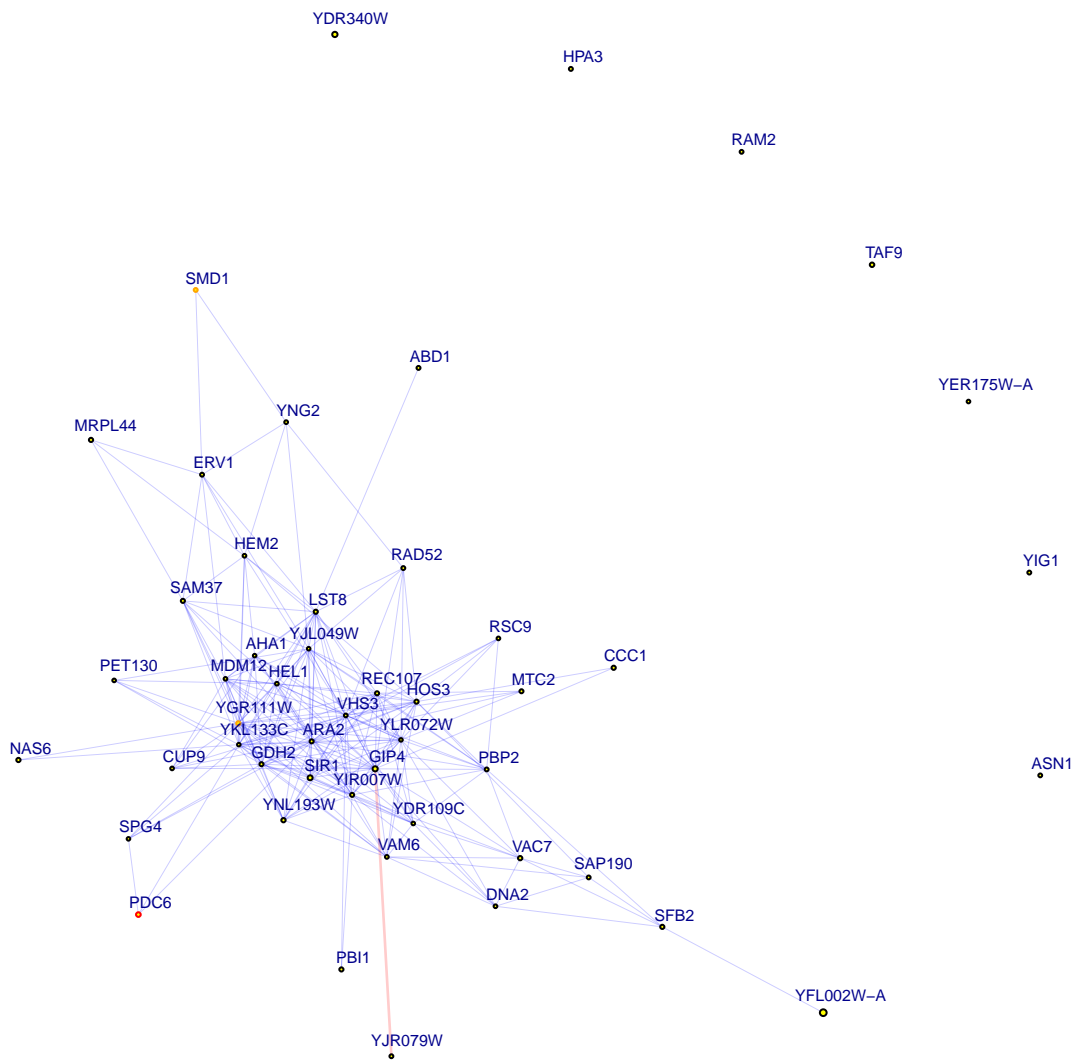

chrVII:656248\_T/G top 100 up and down genes

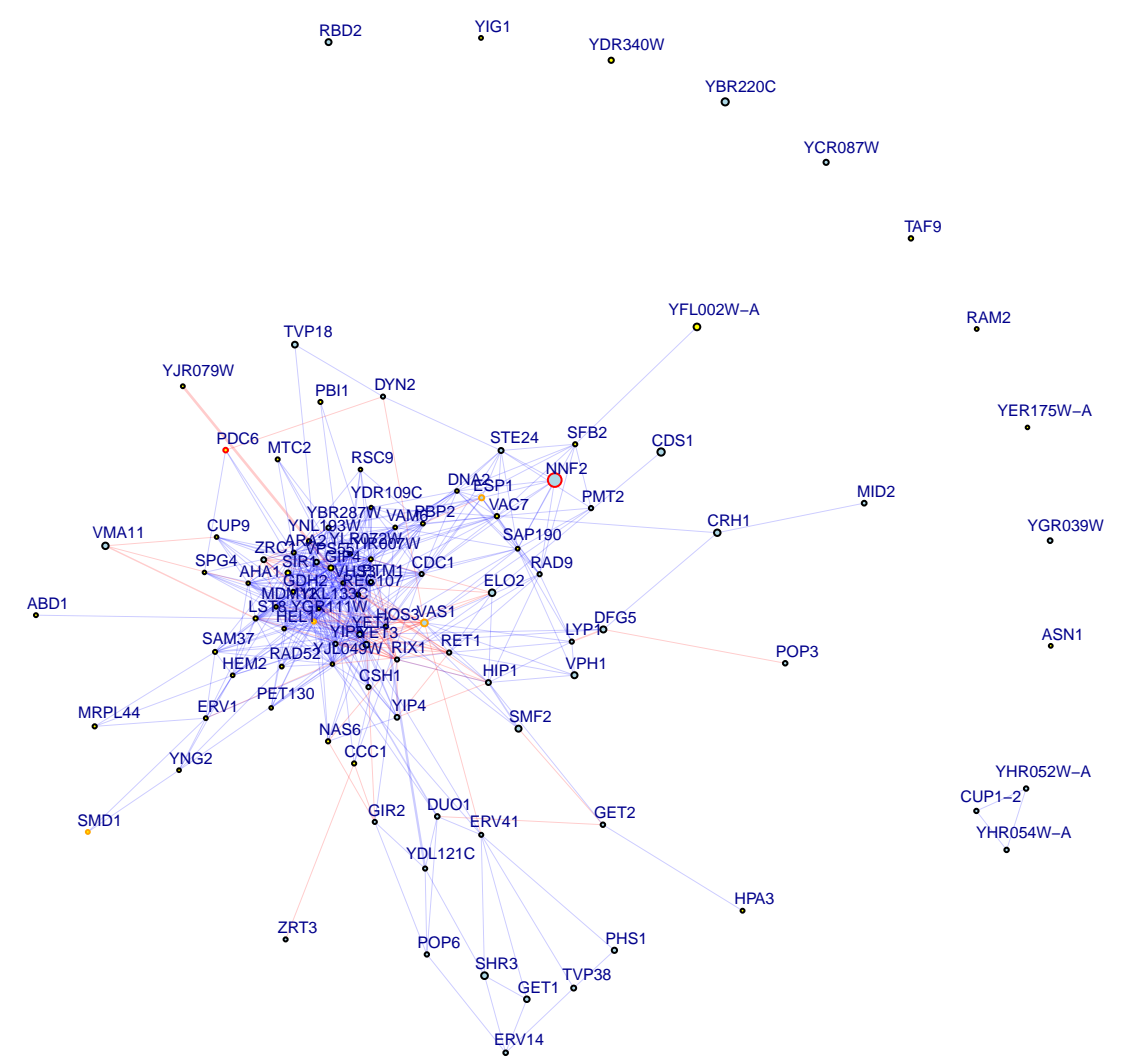

chrVII:850923\_T/C top 50 up genes

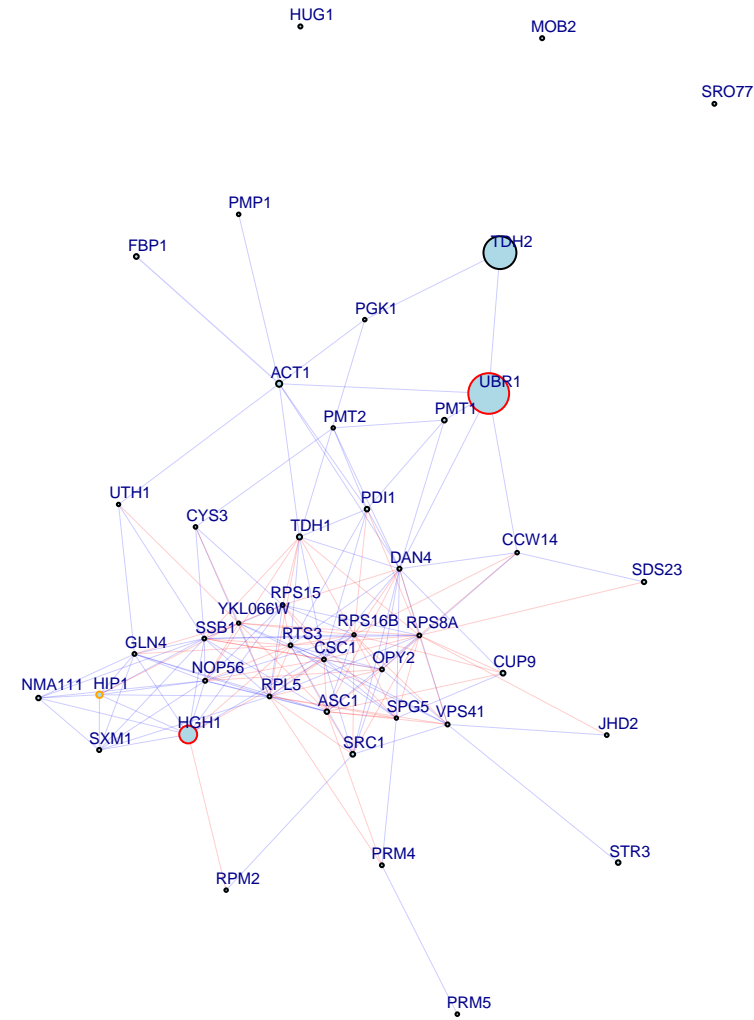

chrVII:850923\_T/C top 50 down genes

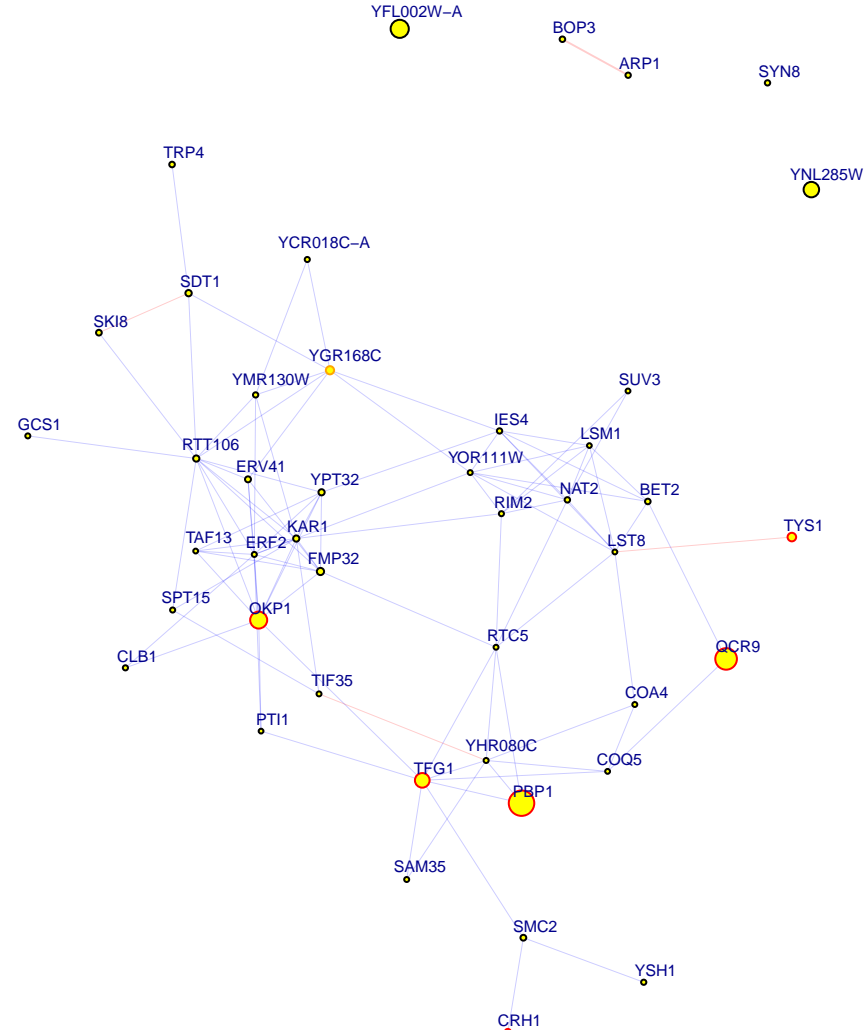

chrVII:850923\_T/C top 100 up and down genes

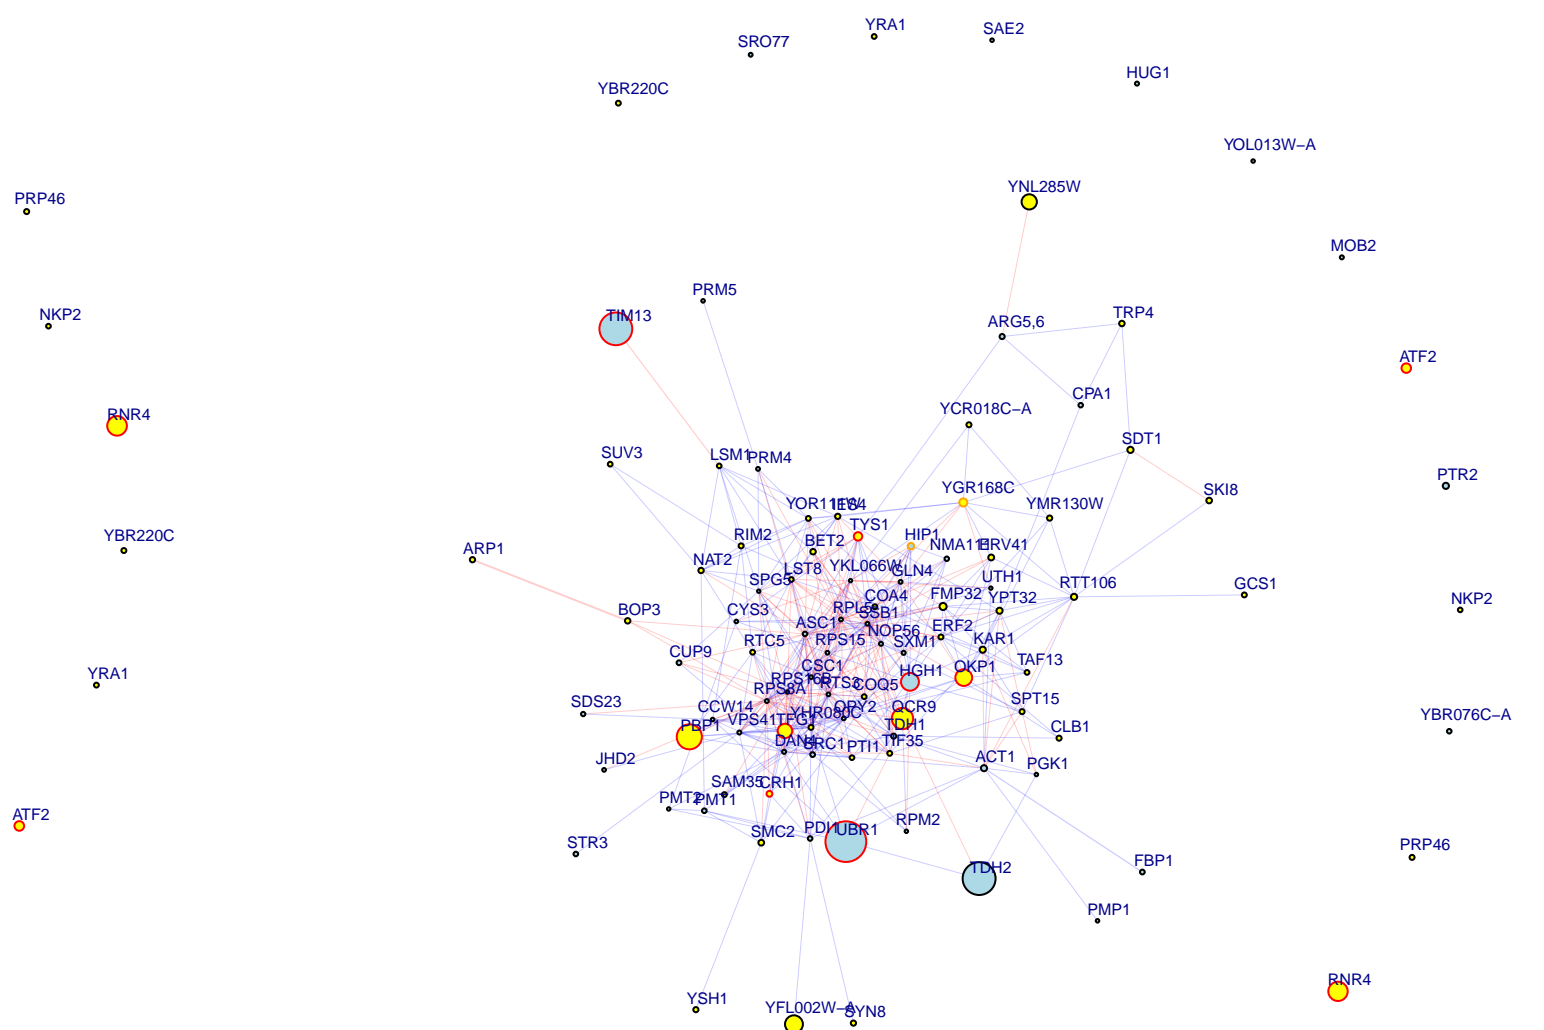

chrVII:984362\_C/T top 50 up genes

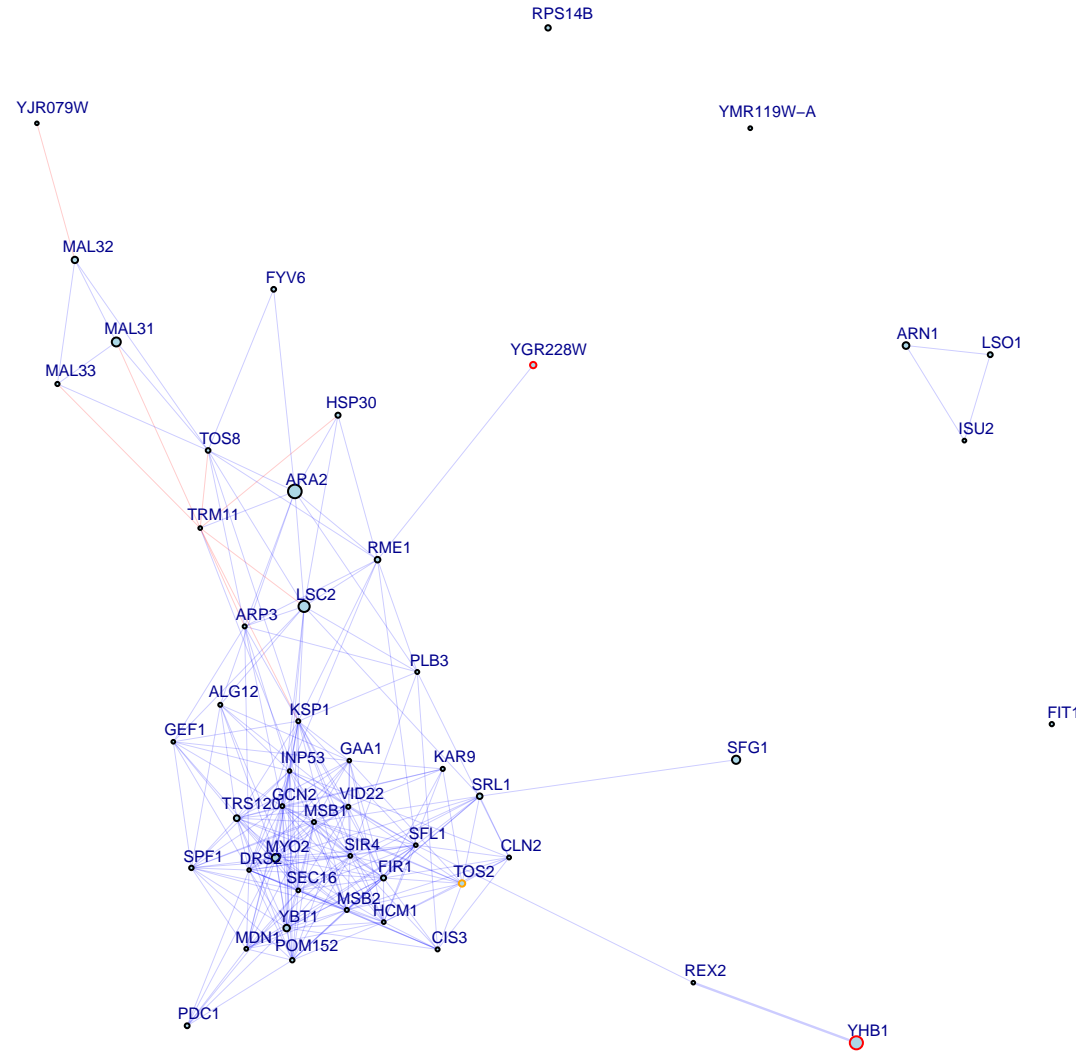

chrVII:984362\_C/T top 50 down genes

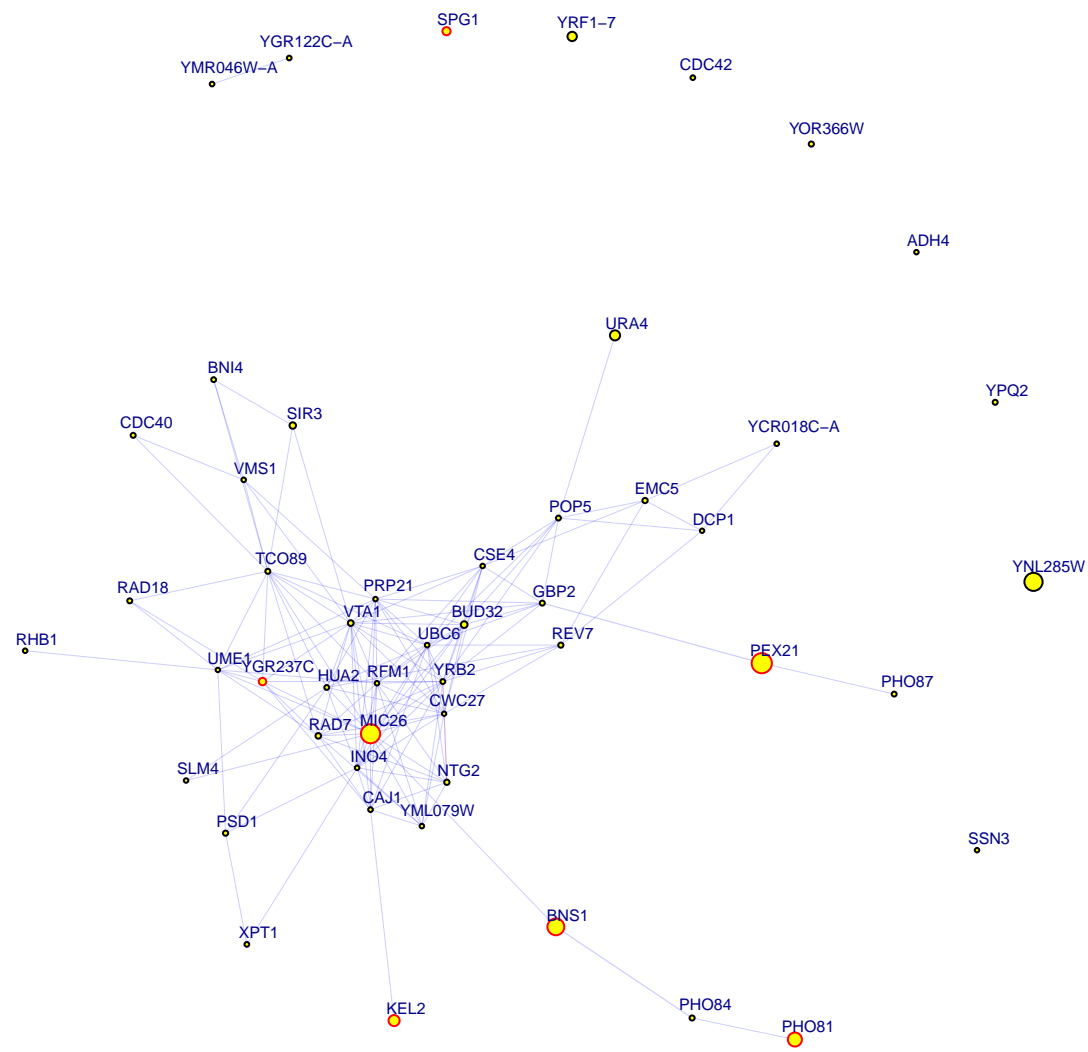

chrVII:984362\_C/T top 100 up and down genes

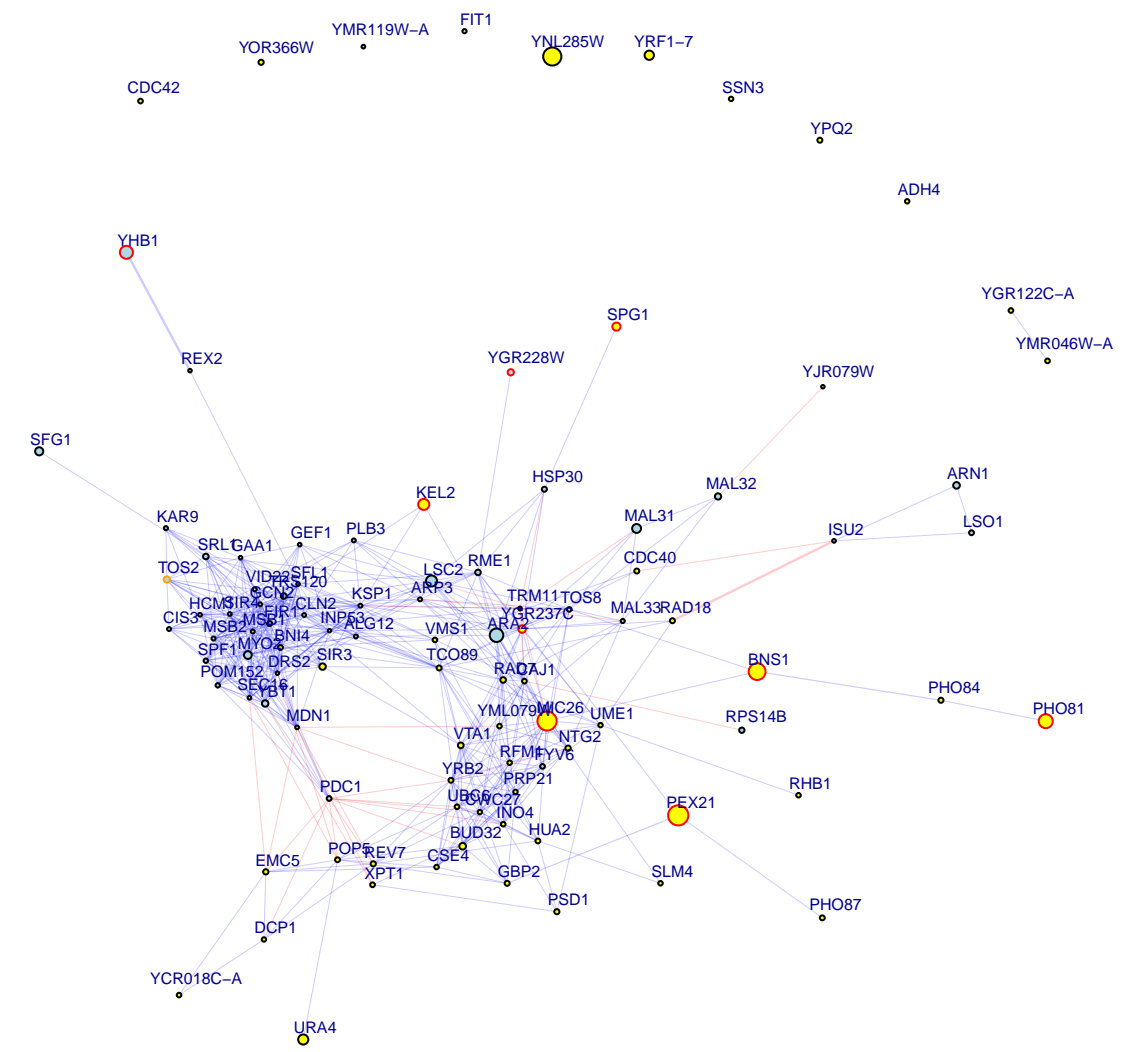



chrVIII:175012\_C/T top 50 up genes

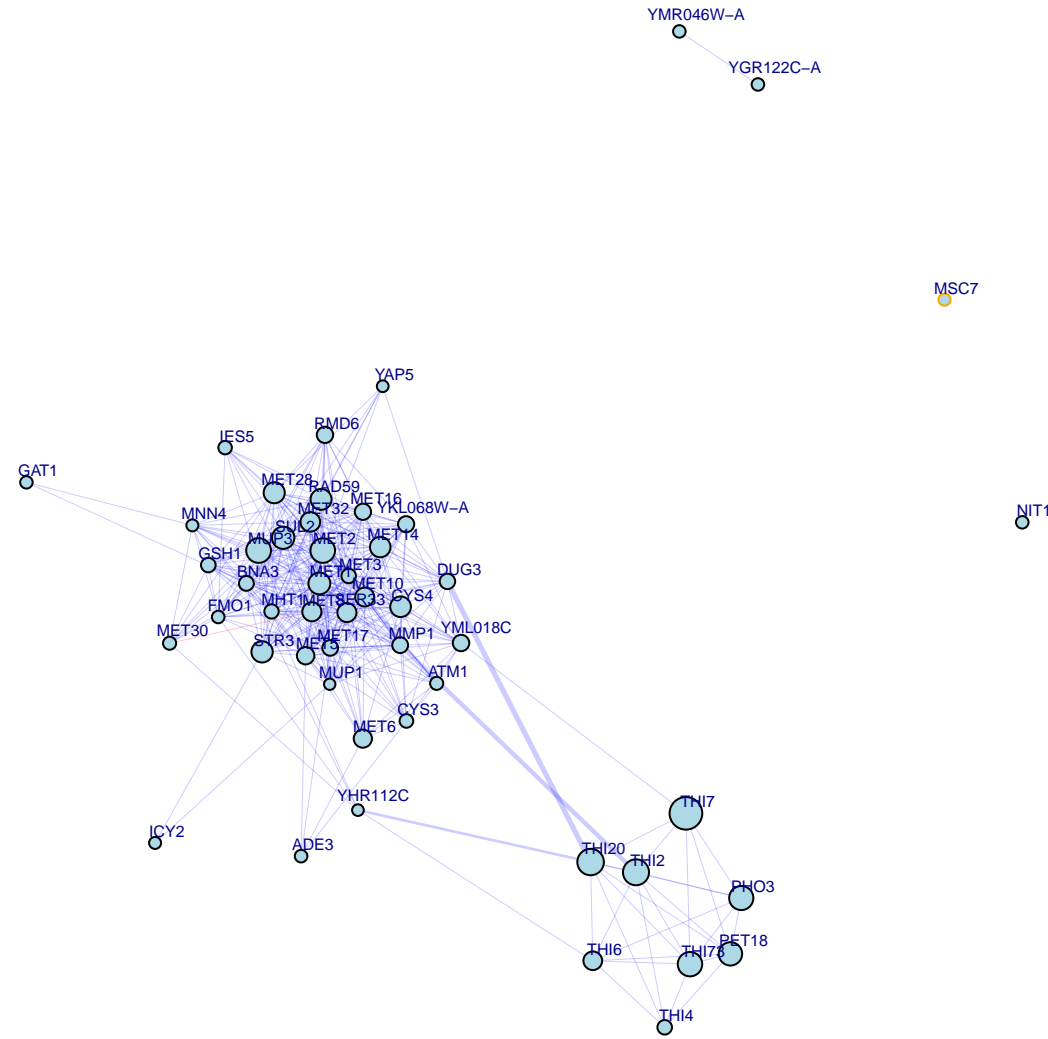

chrVIII:175012\_C/T top 50 down genes

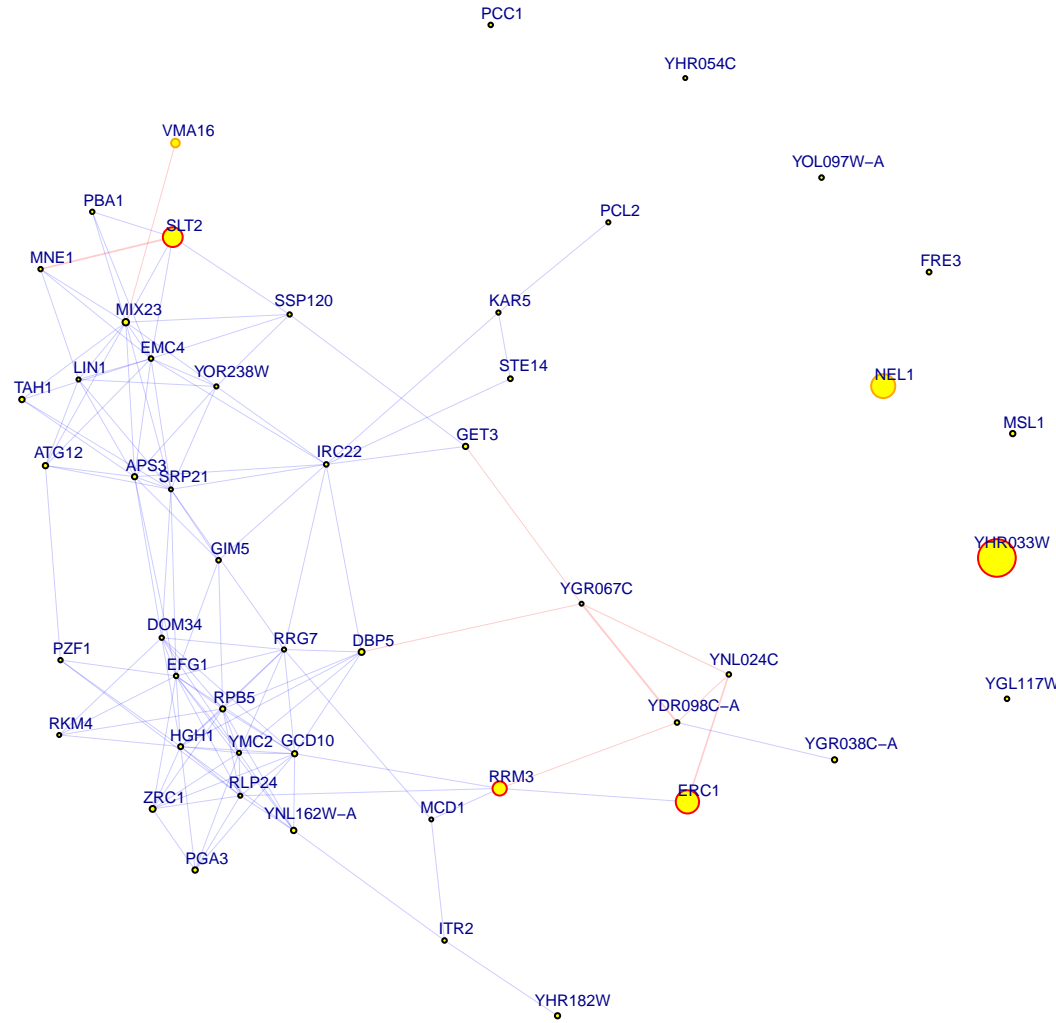

chrVIII:175012\_C/T top 100 up and down genes

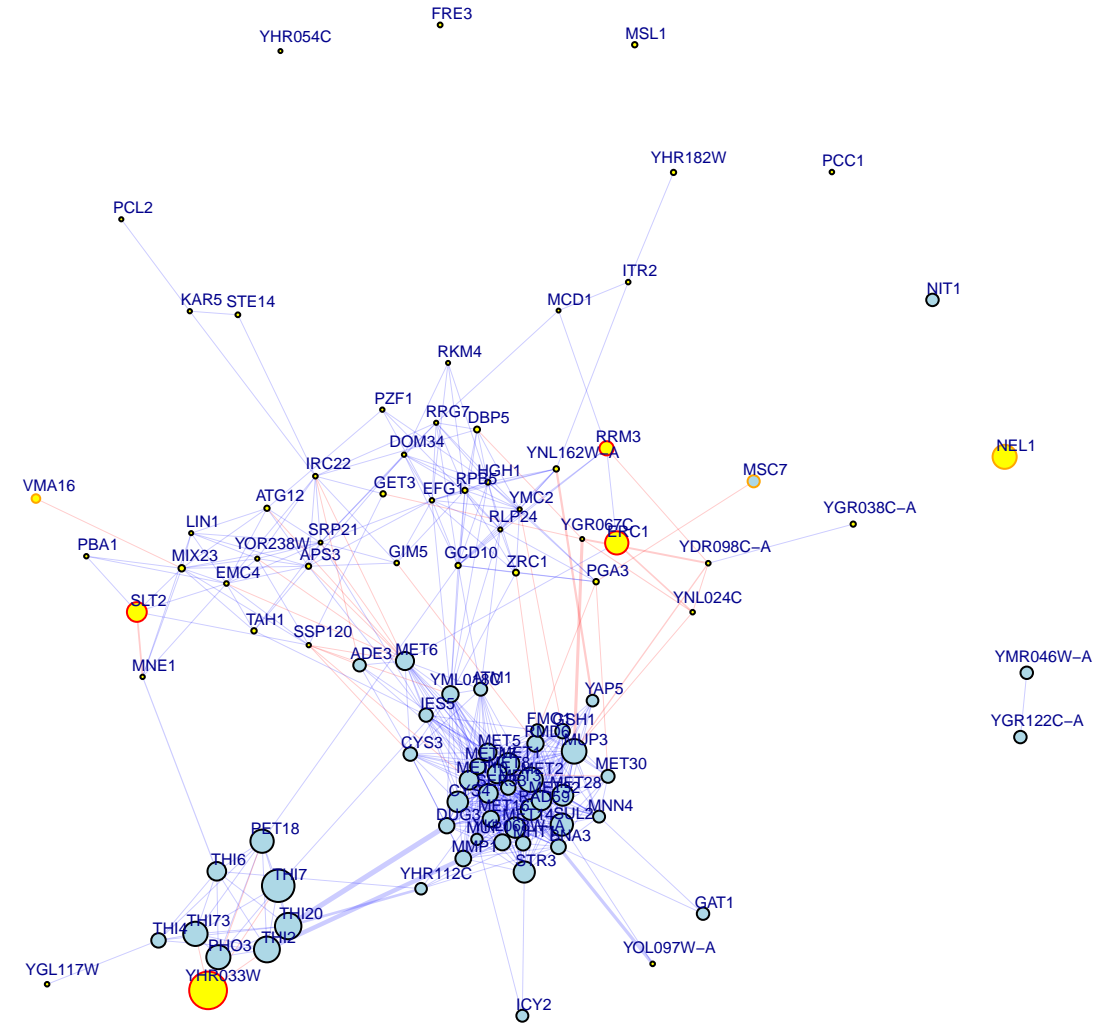

chrVIII:459310\_C/G top 50 up genes

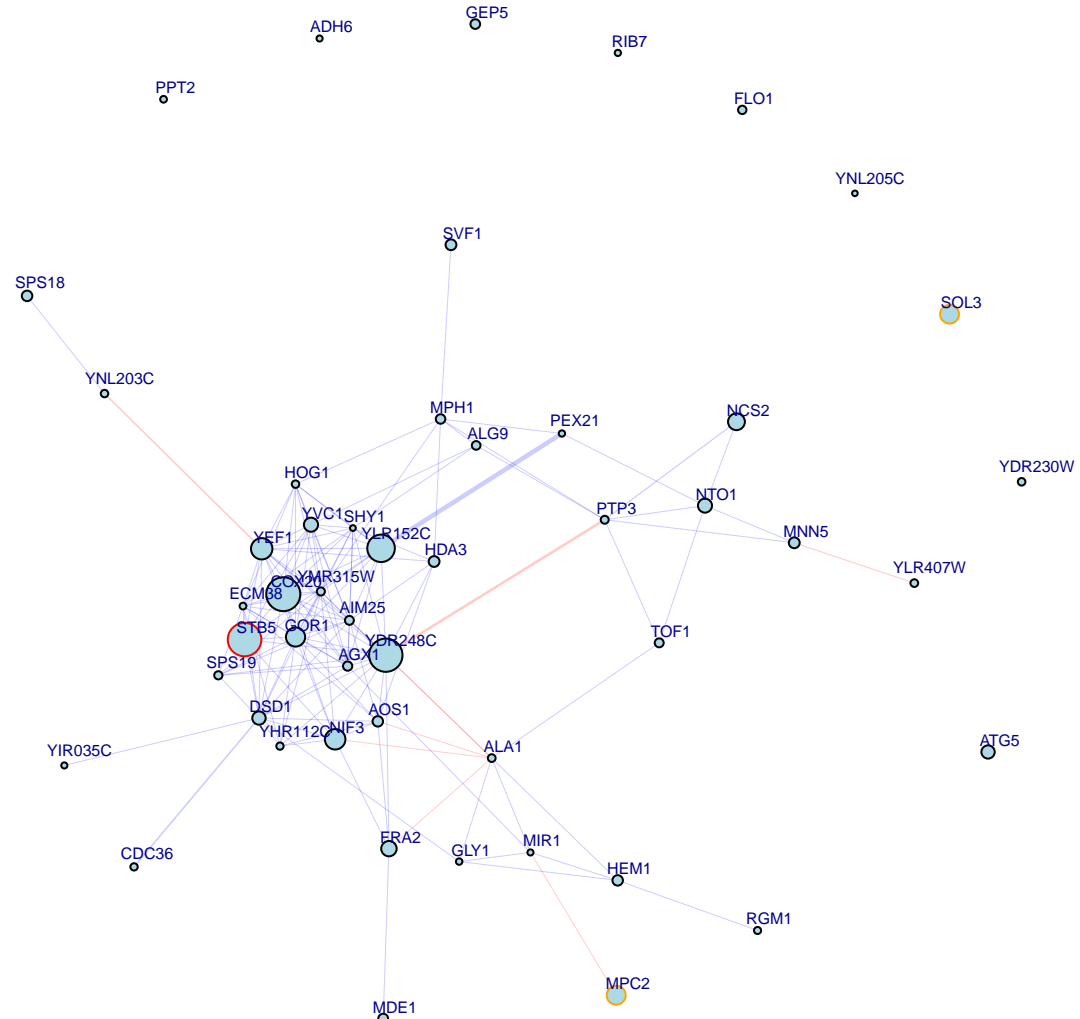

chrVIII:459310\_C/G top 50 down genes

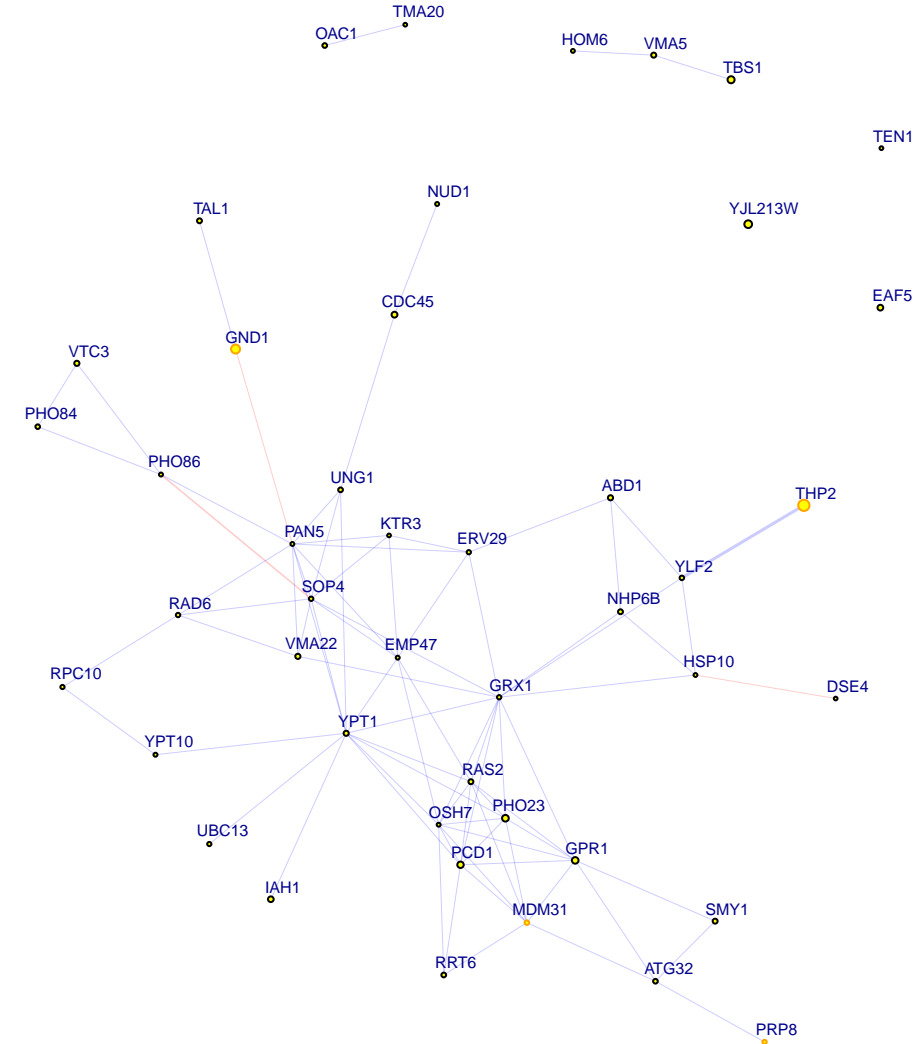

chrVIII:459310\_C/G top 100 up and down genes

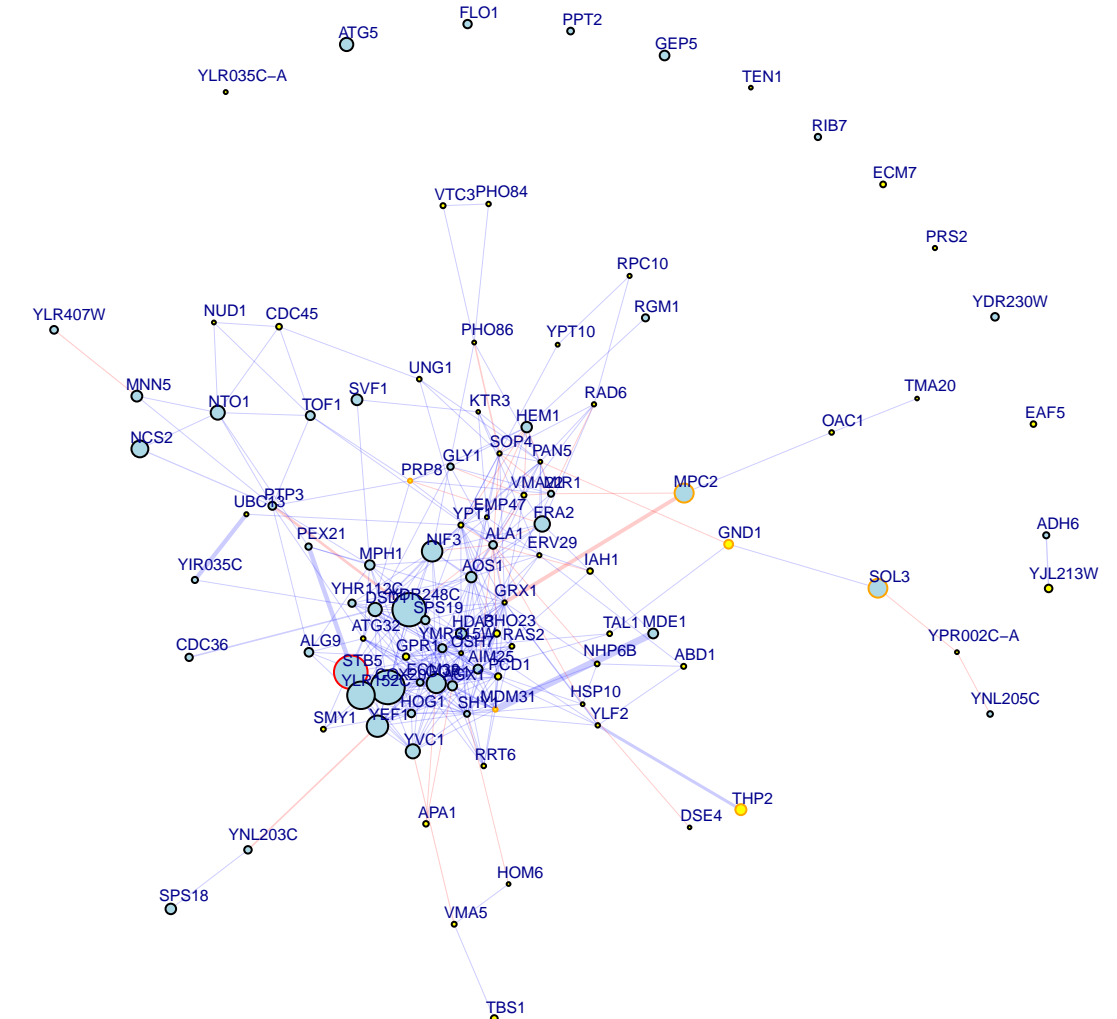

chrIX:28874\_G/C top 35 up genes

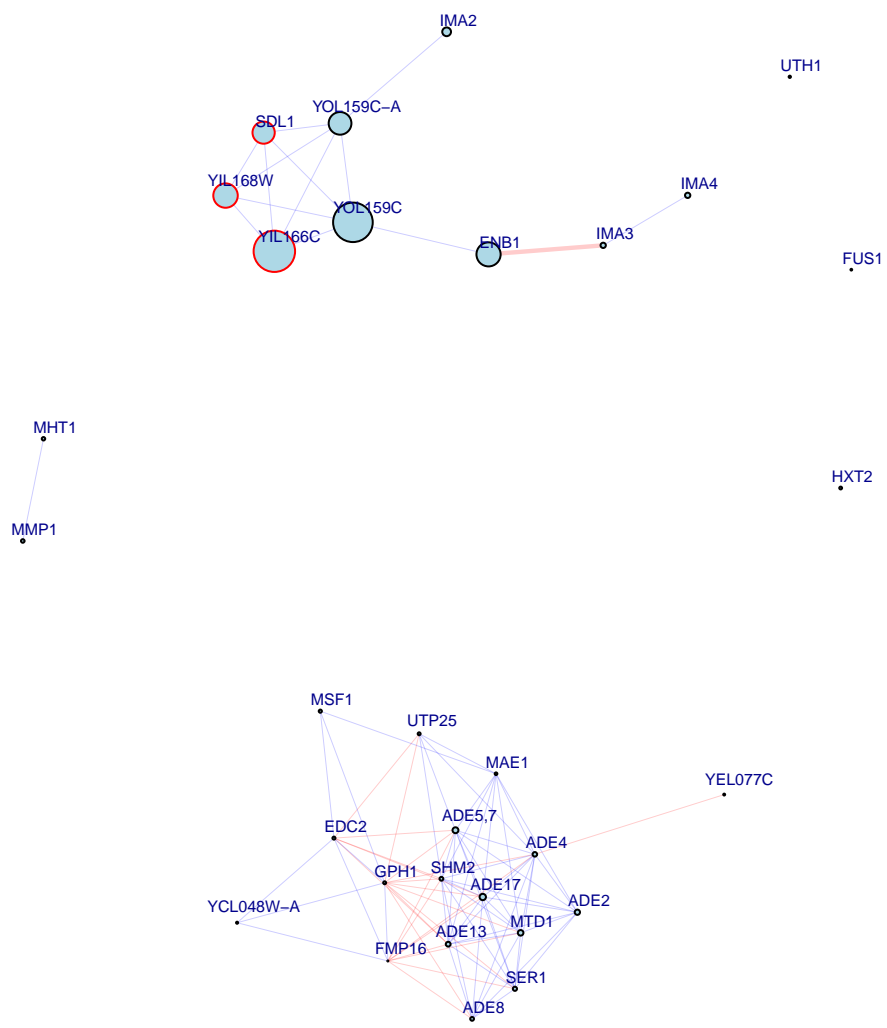

chrIX:28874\_G/C top 31 down genes

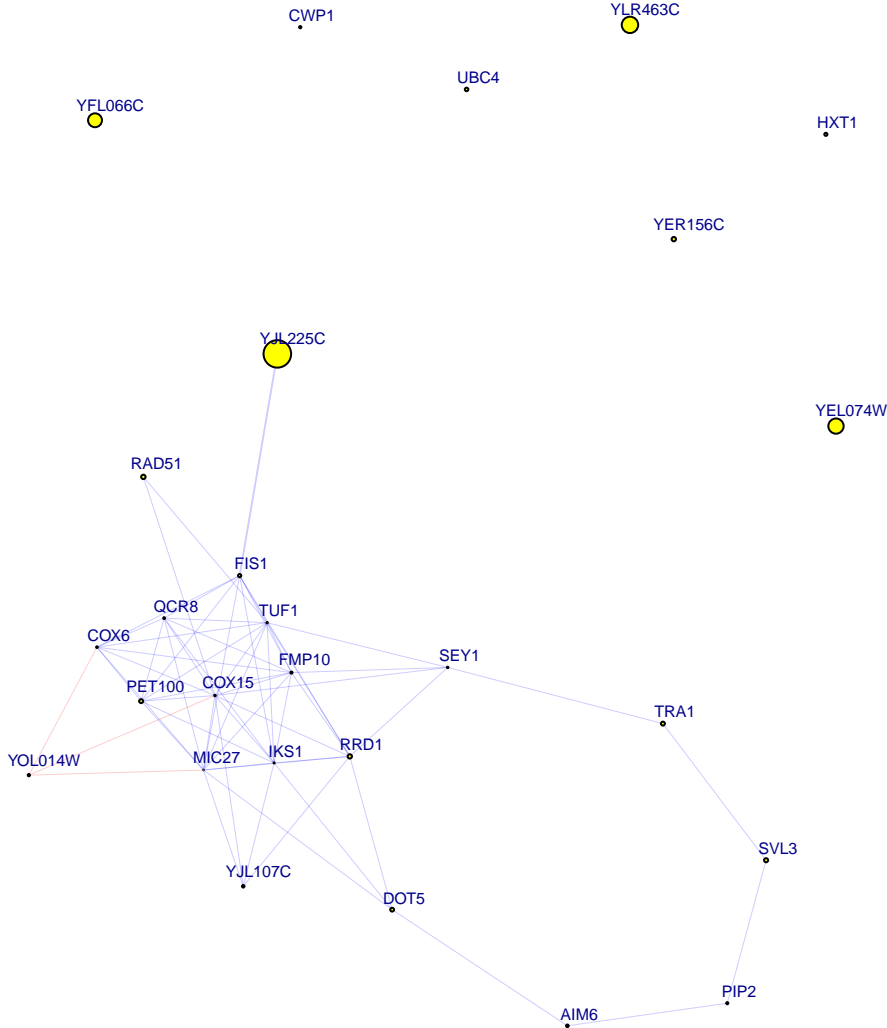

chrIX:28874\_G/C top 66 up and down genes

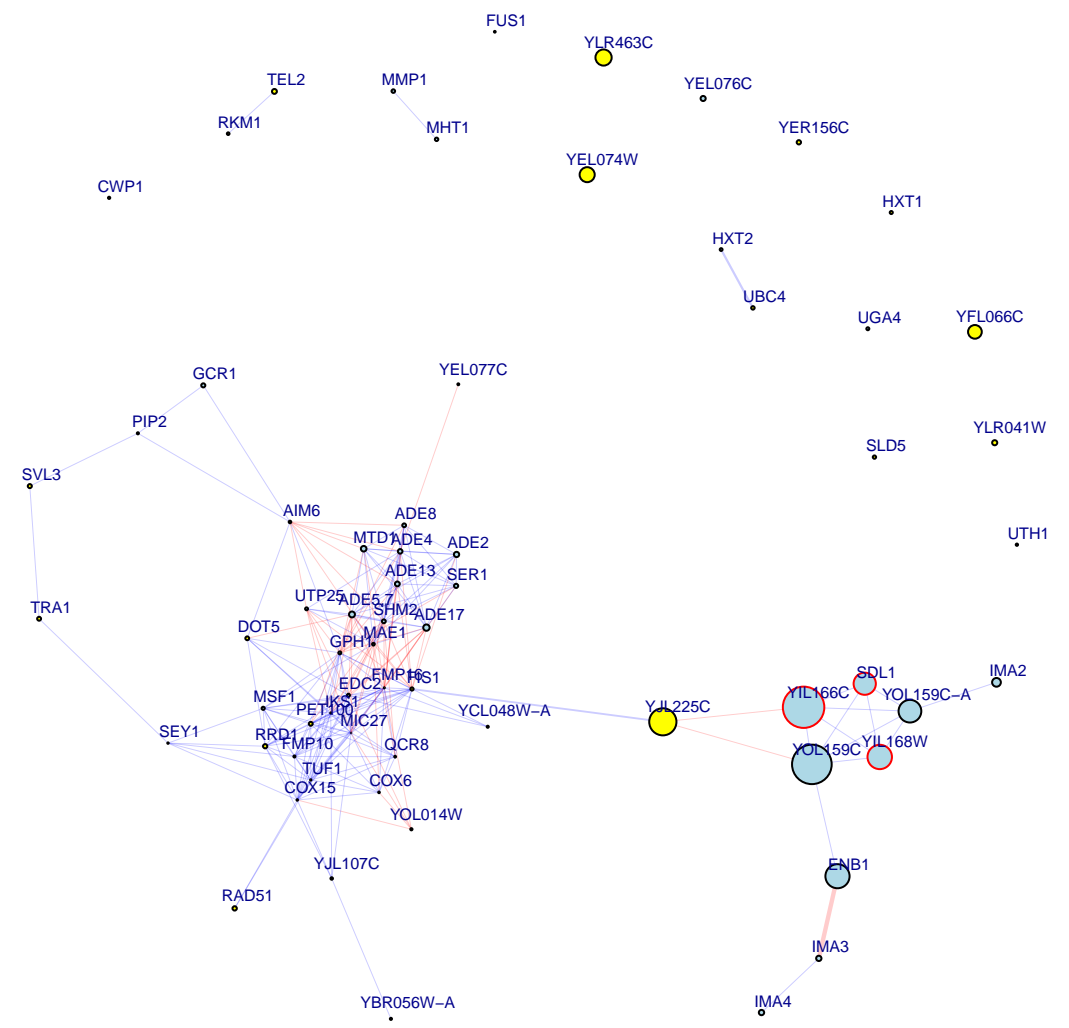



chrIX:105090\_T/C top 50 up genes

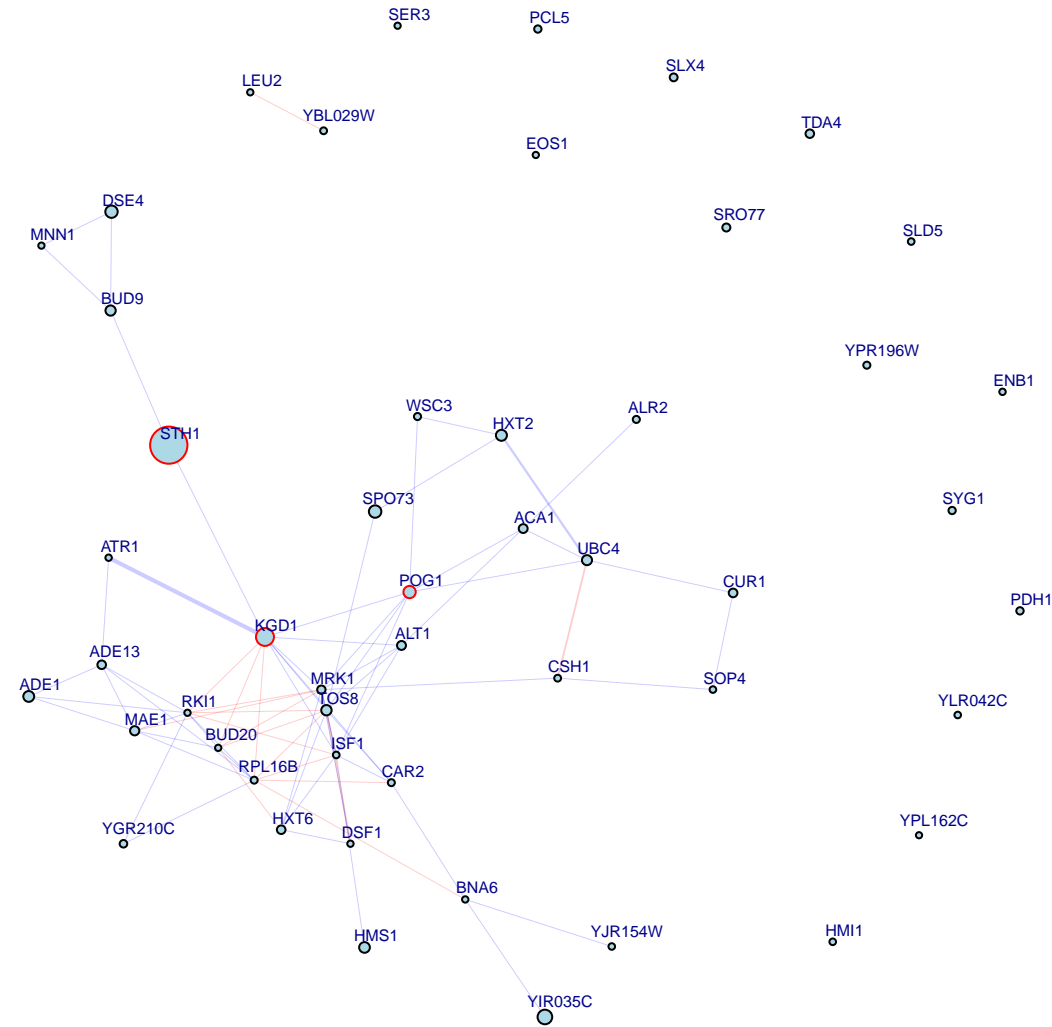

chrIX:105090\_T/C top 50 down genes

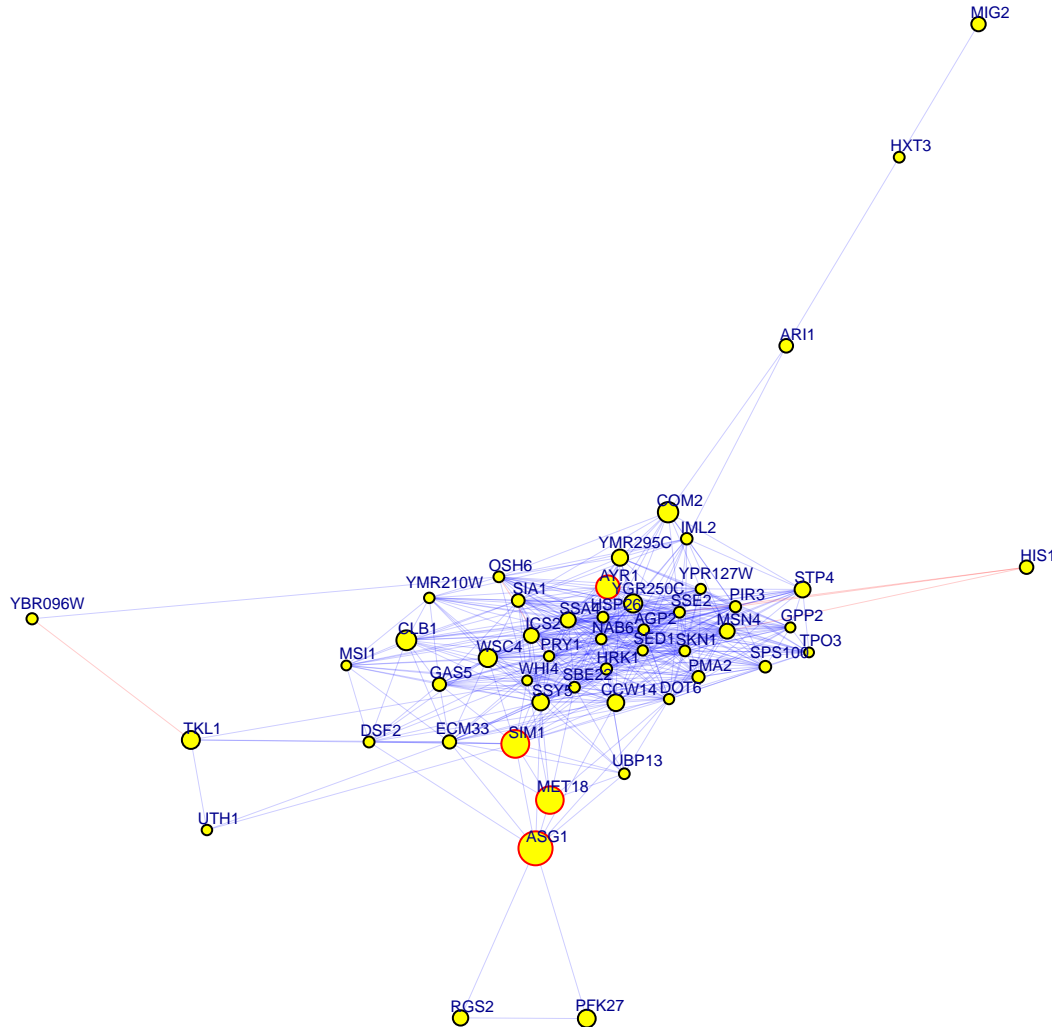

chrIX:105090\_T/C top 100 up and down genes

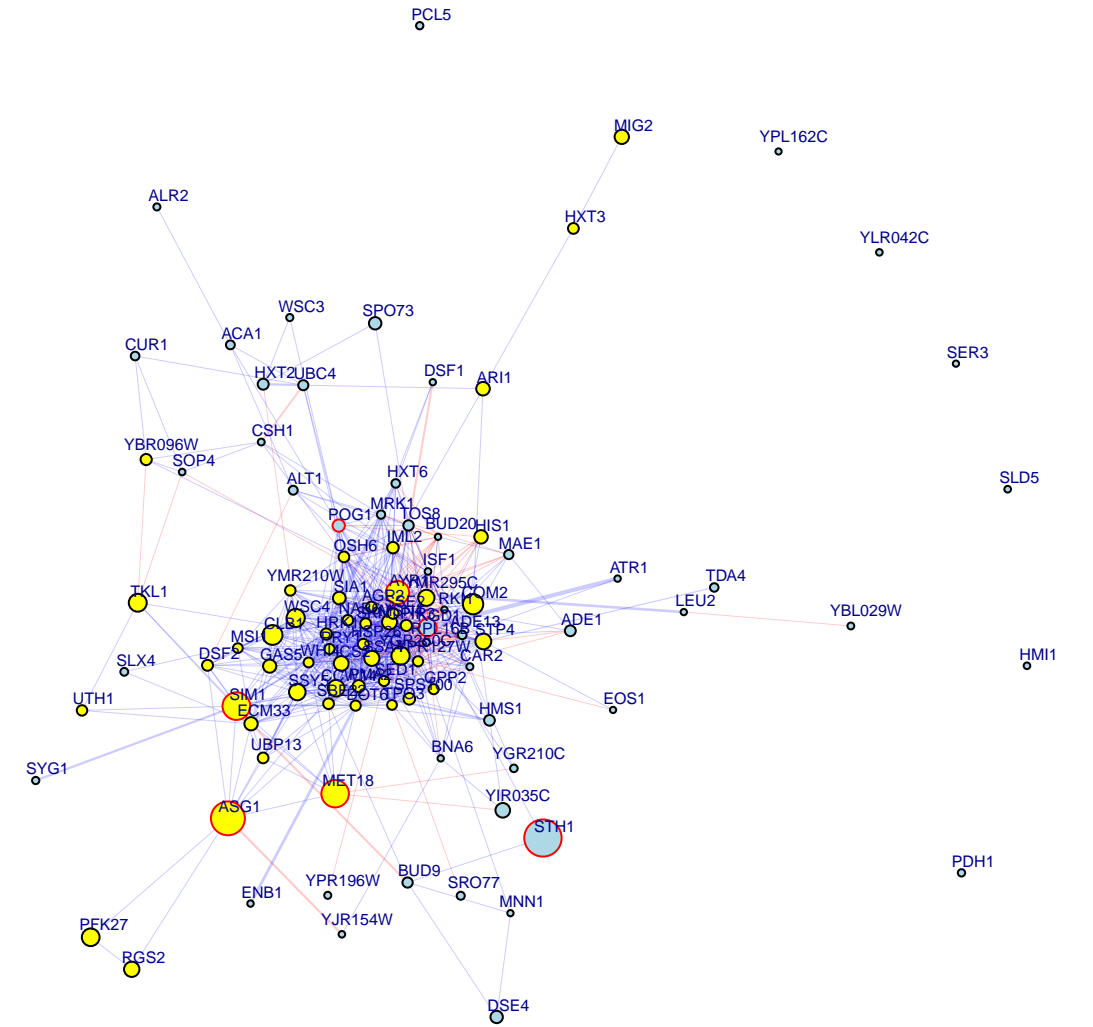

chrIX:178160\_C/T top 50 up genes

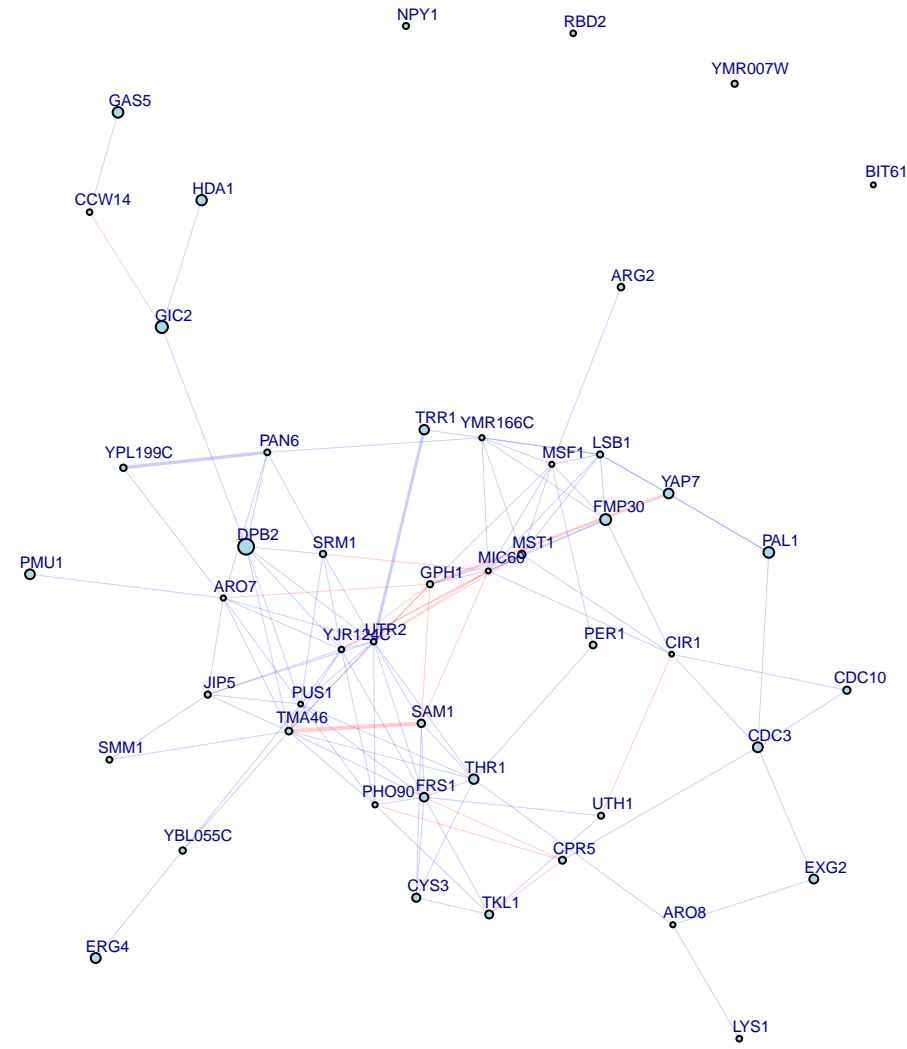

chrIX:178160\_C/T top 50 down genes

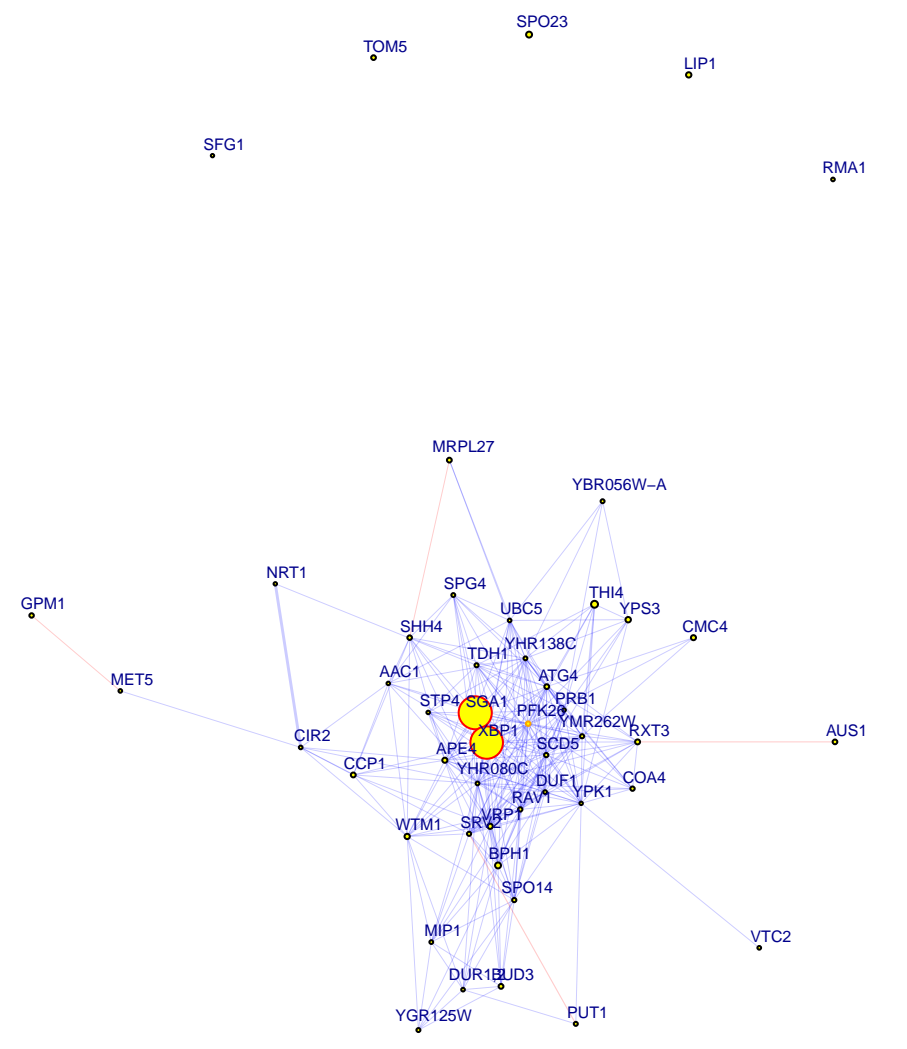

chrIX:178160\_C/T top 100 up and down genes

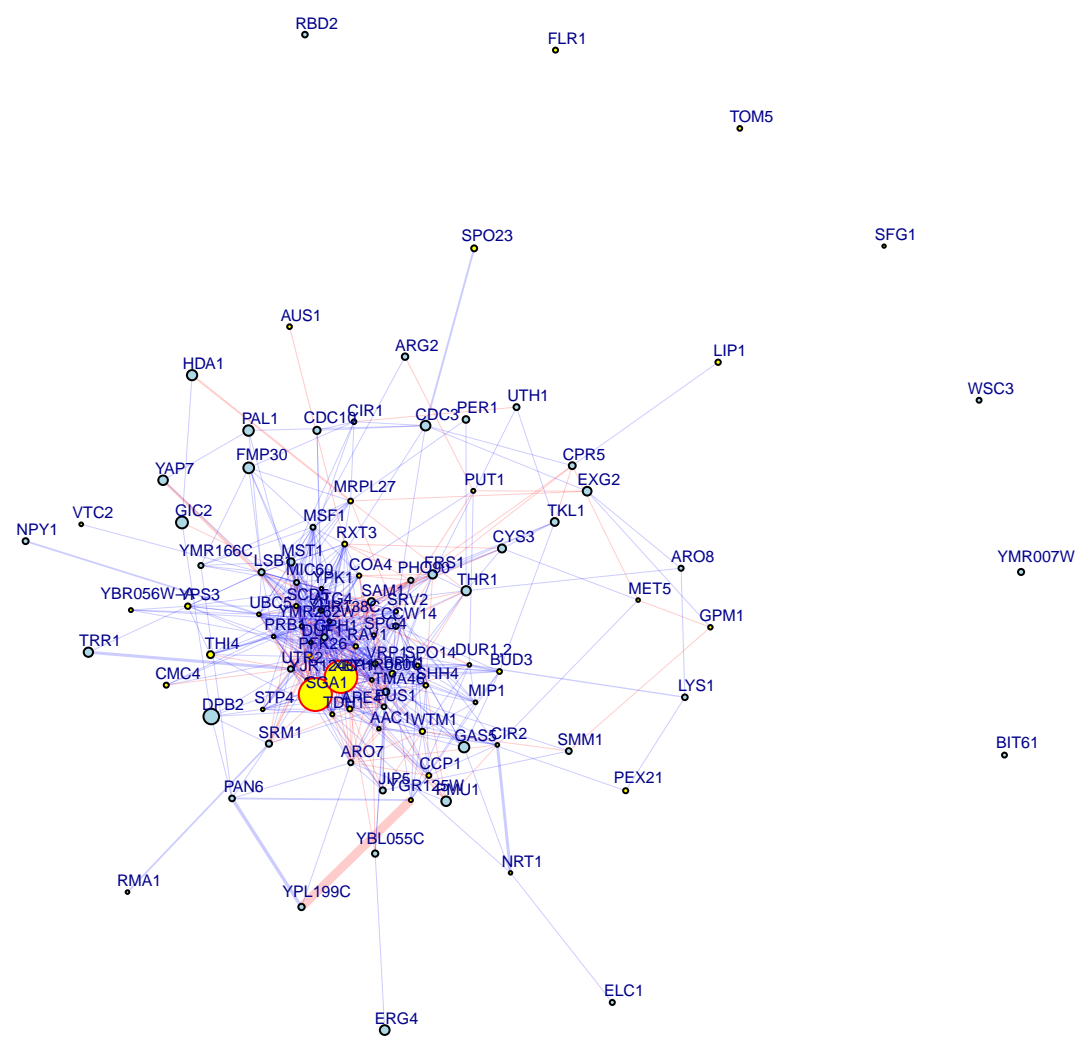

chrIX:227301\_A/T top 37 up genes

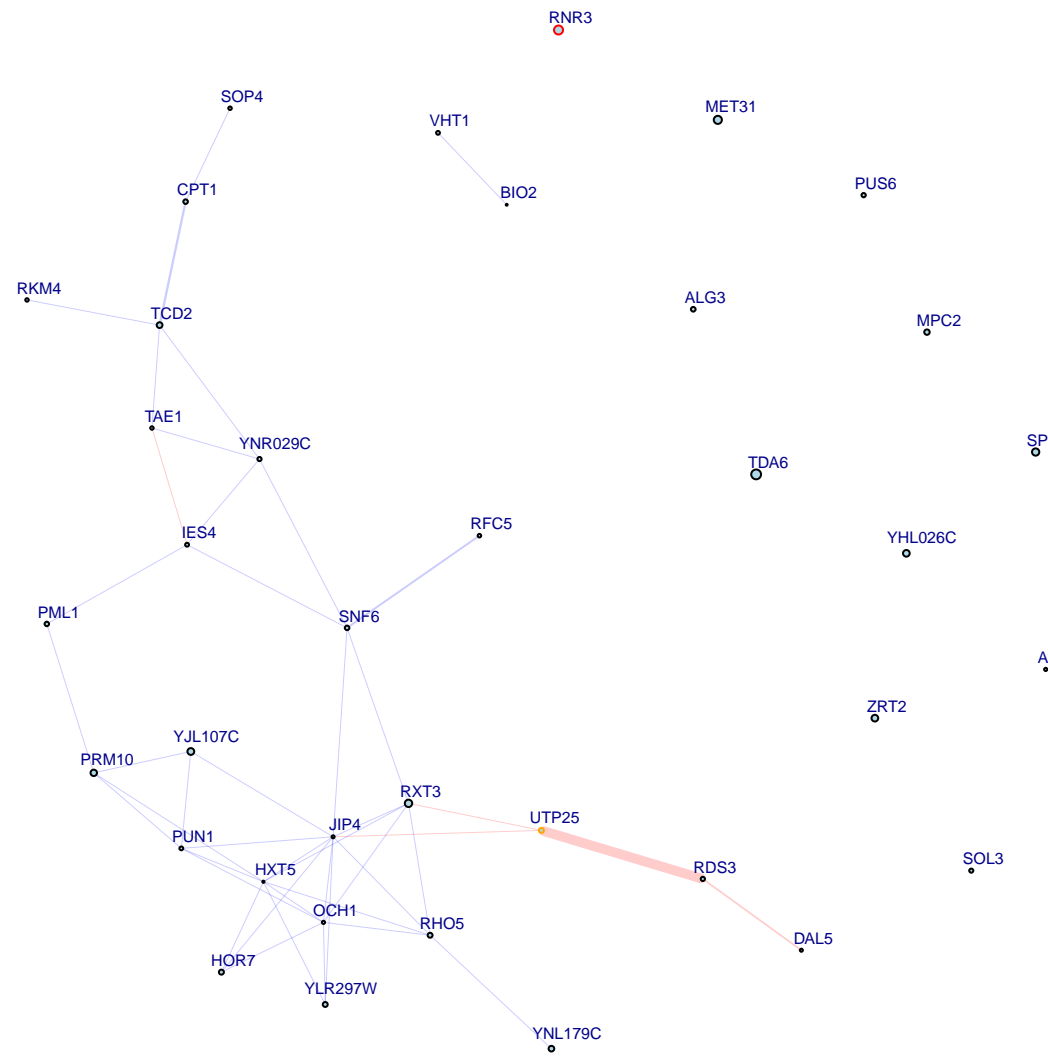

chrIX:227301\_A/T top 50 down genes

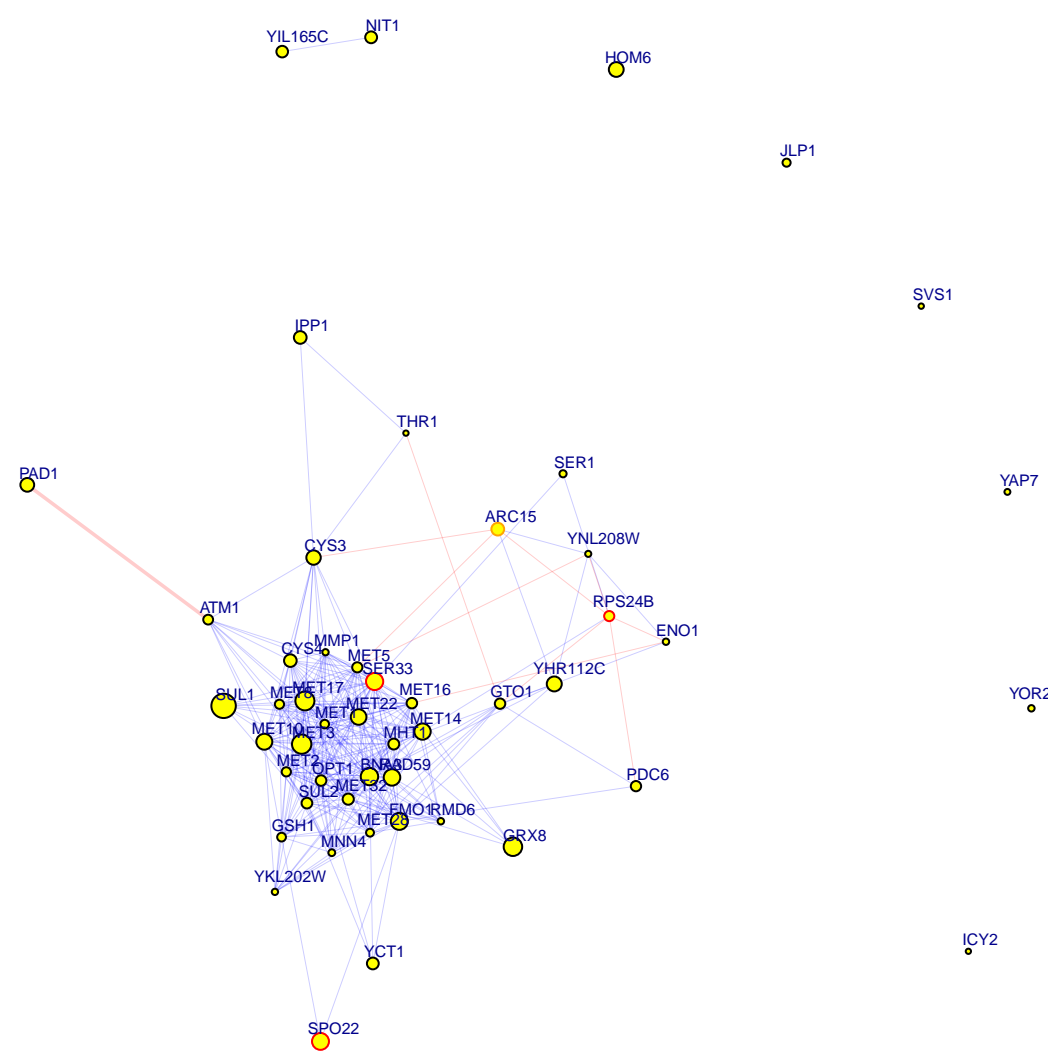

chrIX:227301\_A/T top 87 up and down genes

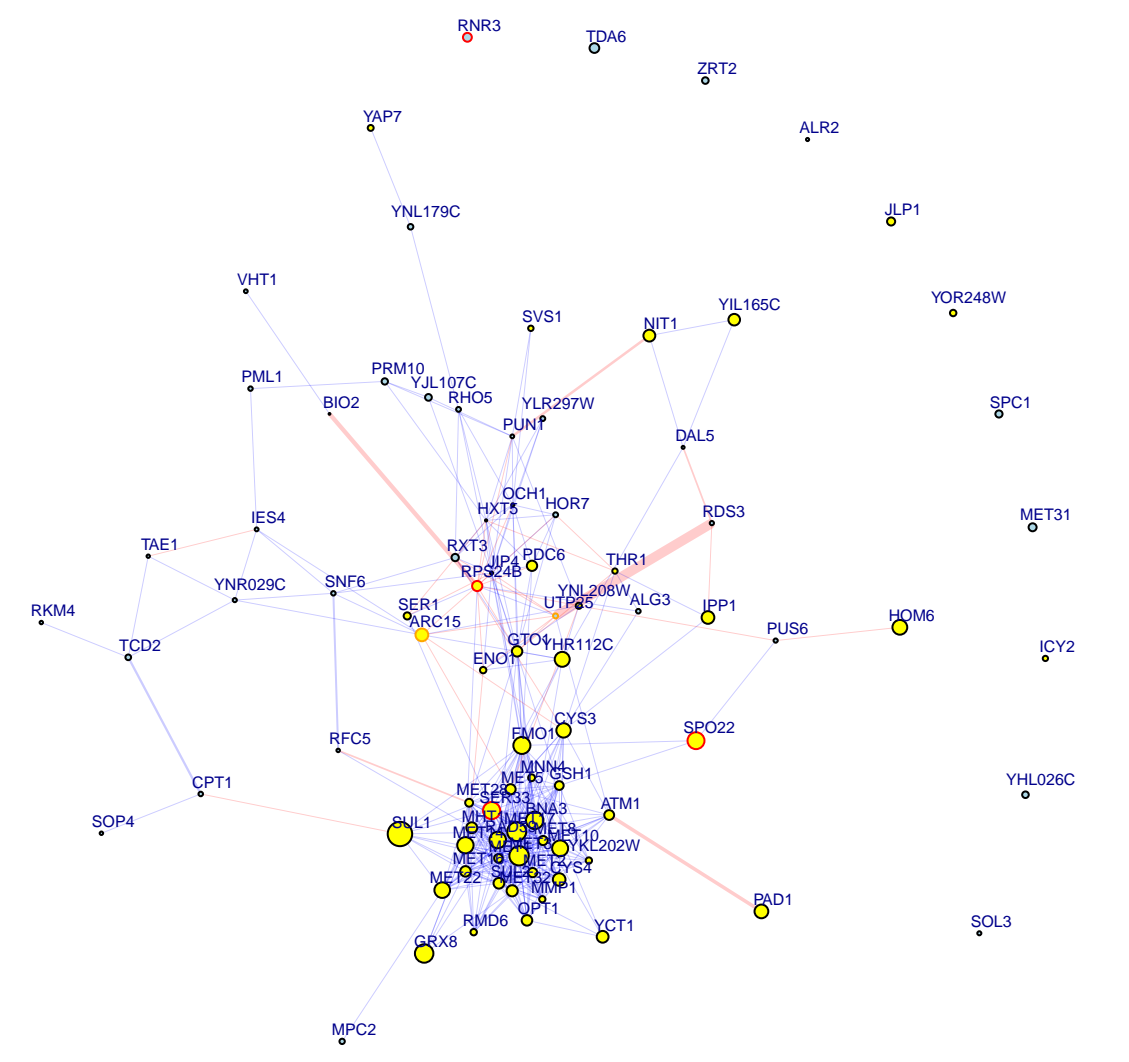

chrIX:386051\_A/G top 25 up genes

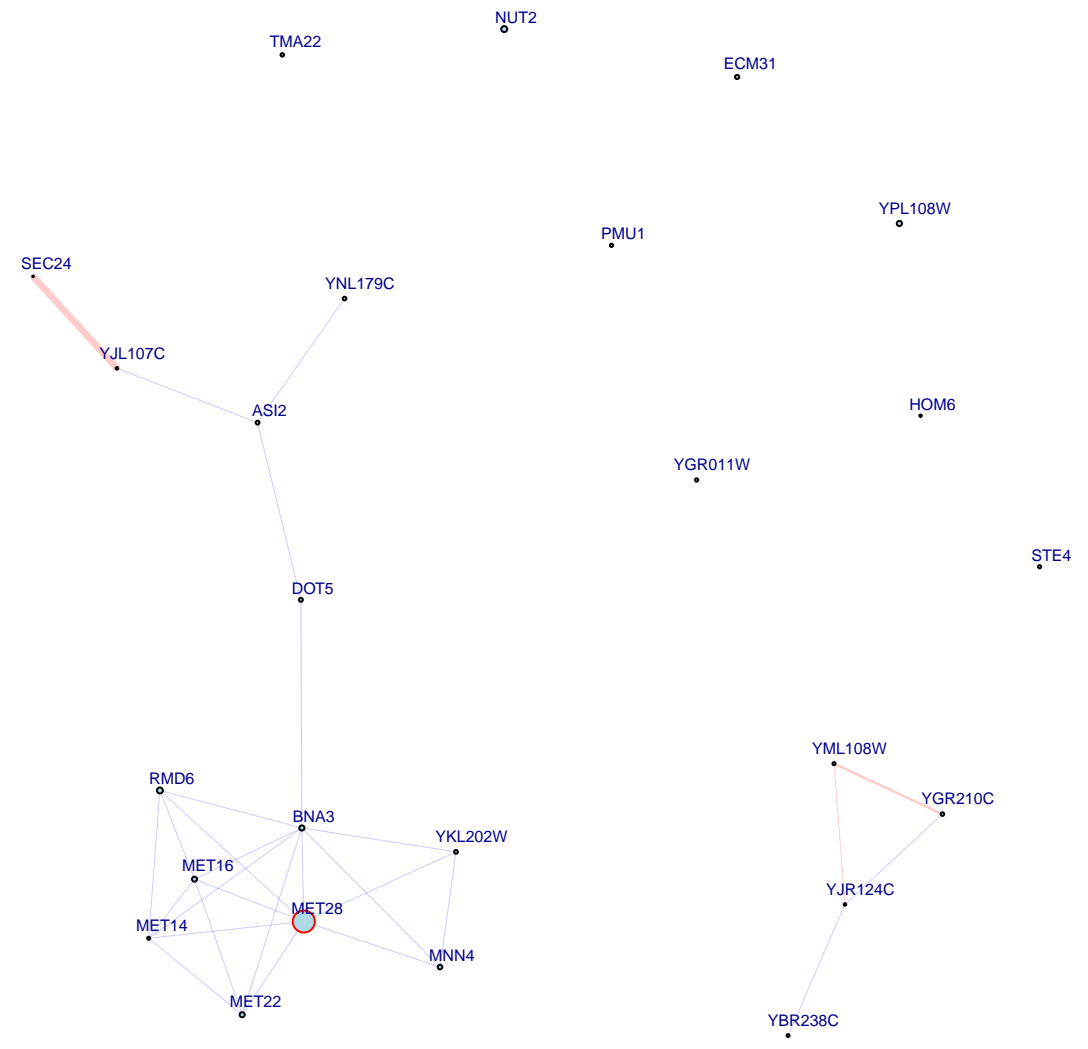

chrIX:386051\_A/G top 37 down genes

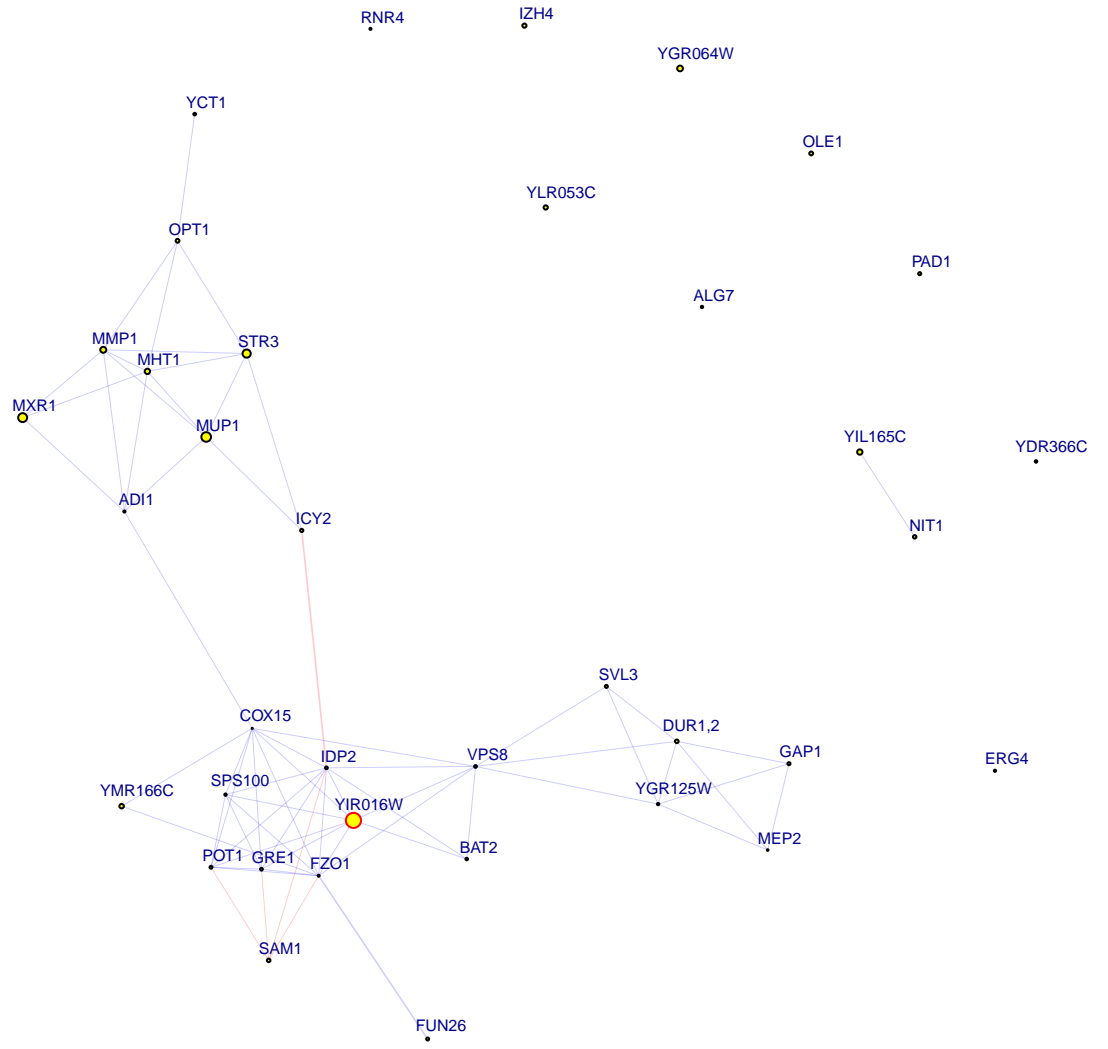

chrIX:386051\_A/G top 62 up and down genes

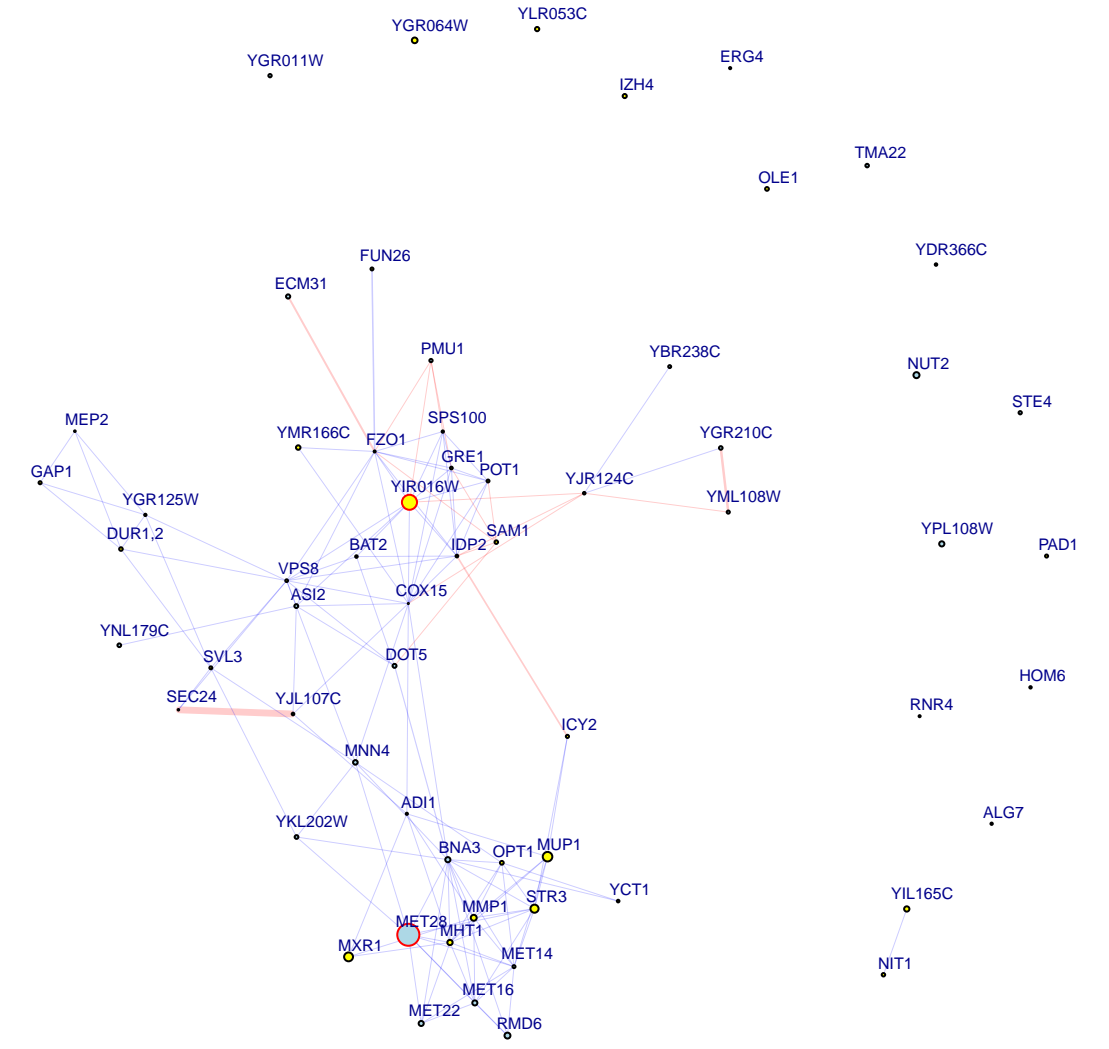

chrX:26108\_C/T top 50 up genes

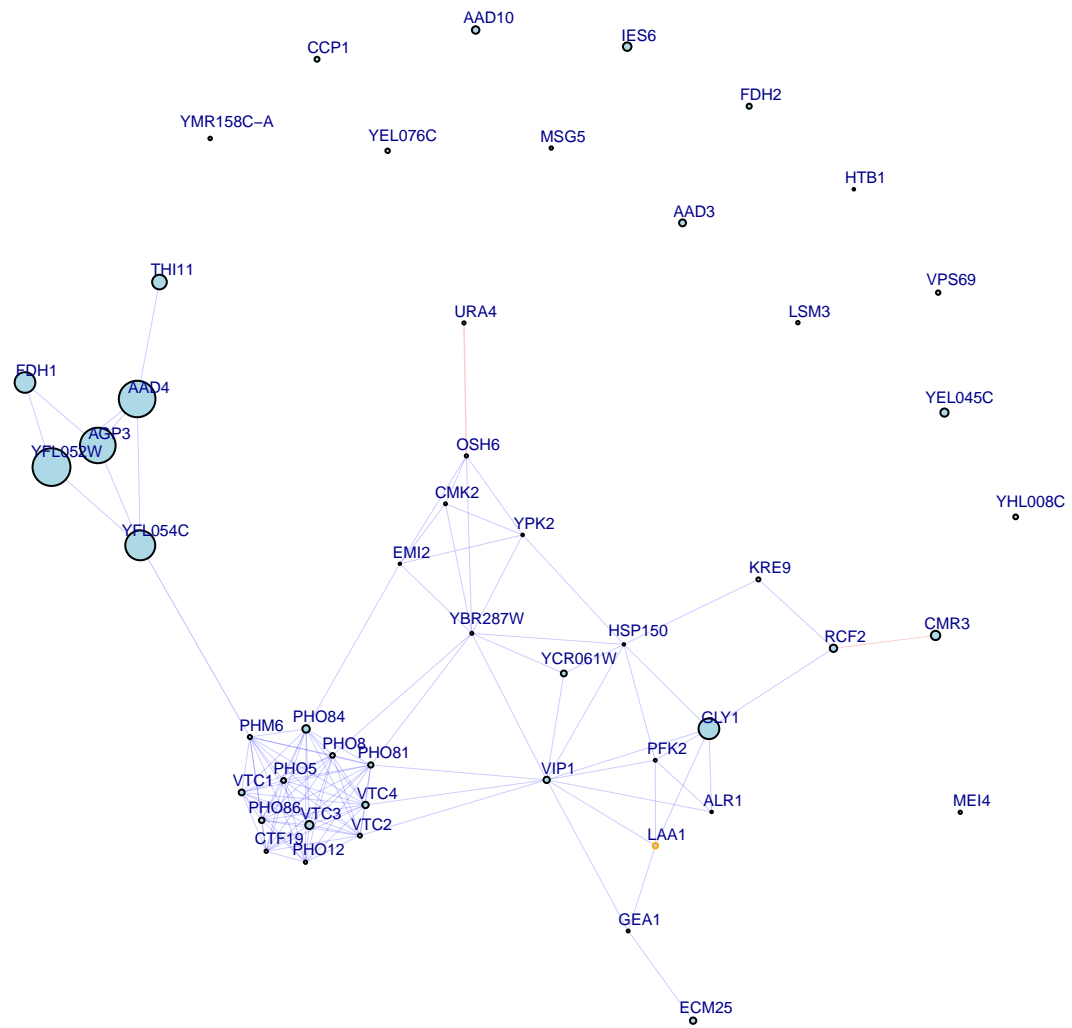

chrX:26108\_C/T top 49 down genes

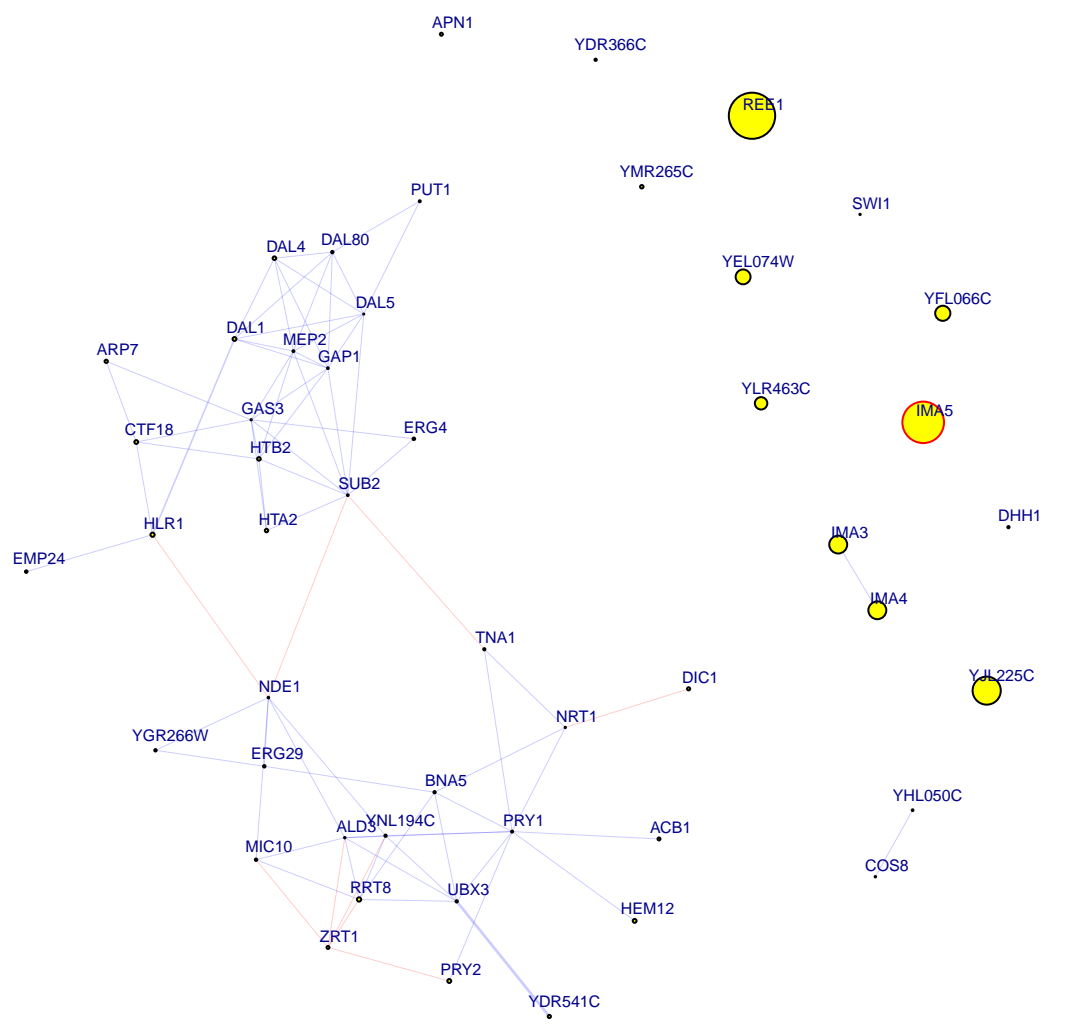

chrX:26108\_C/T top 99 up and down genes

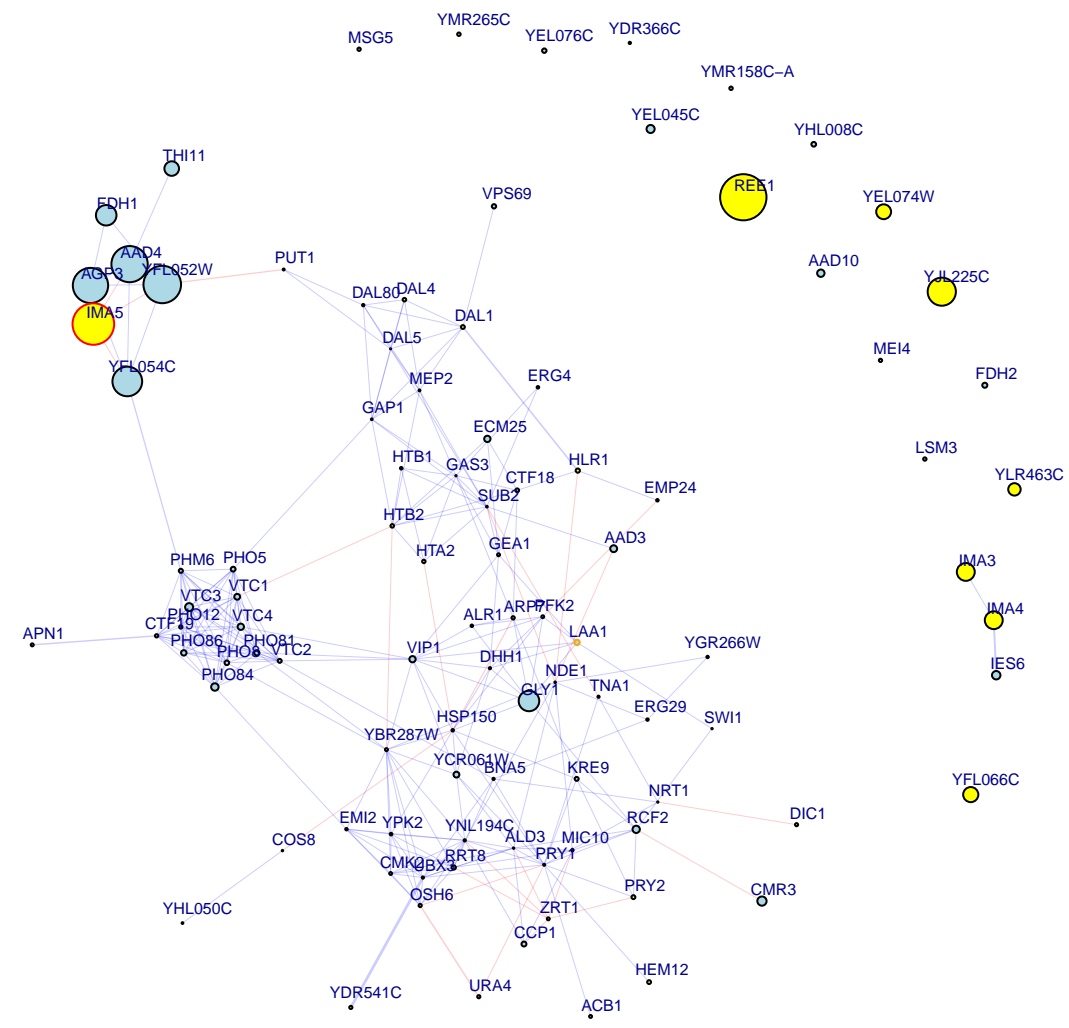

chrX:108904\_A/G top 50 up genes

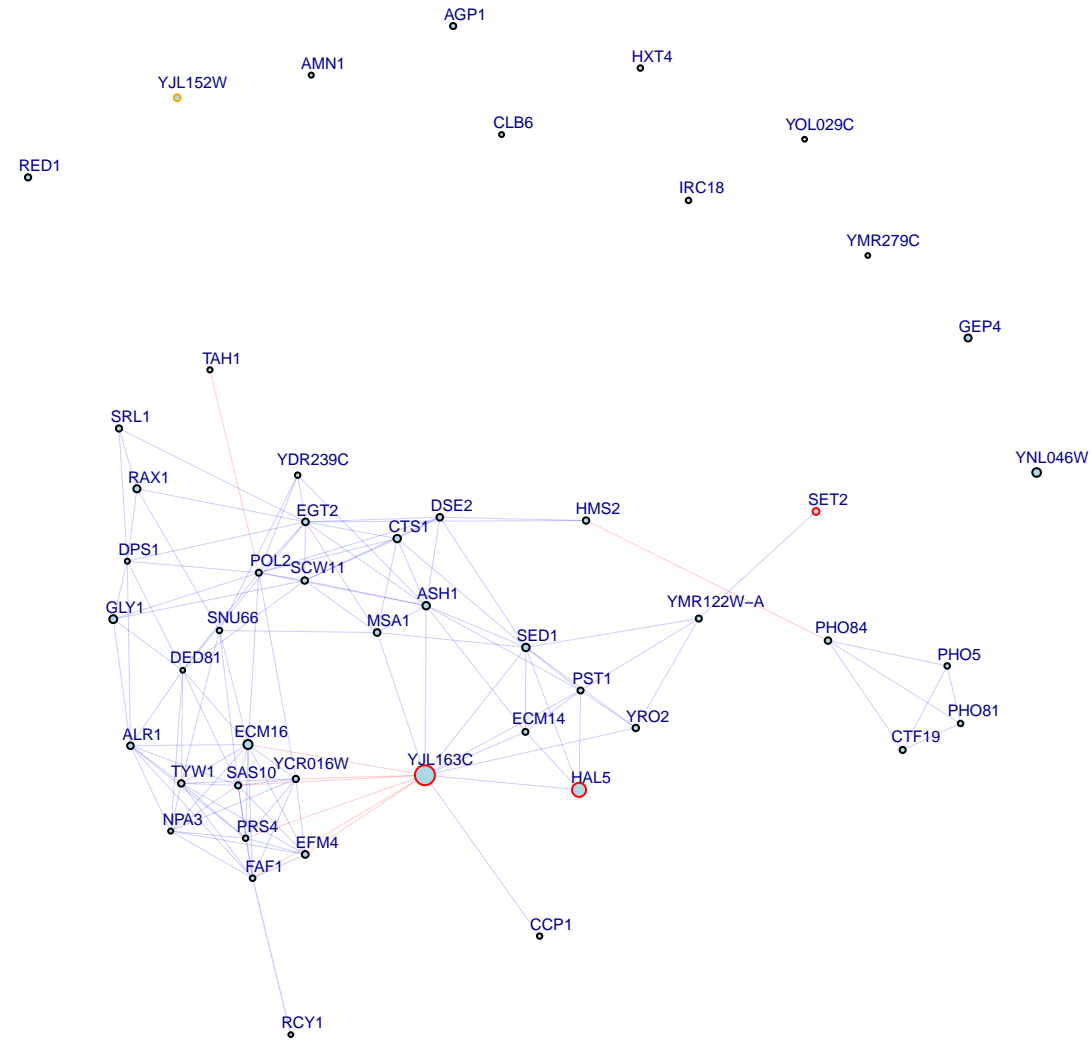

chrX:108904\_A/G top 50 down genes

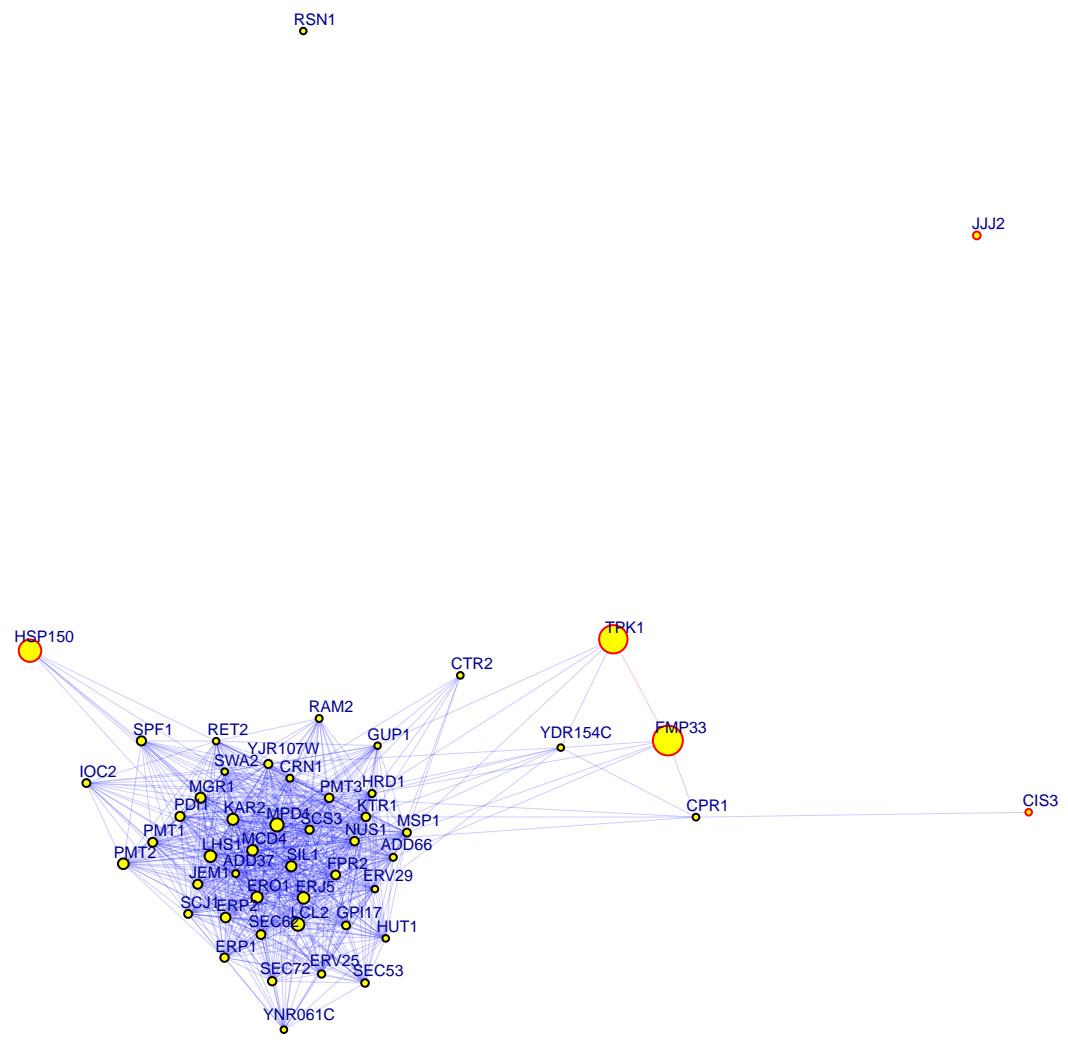

chrX:108904\_A/G top 100 up and down genes

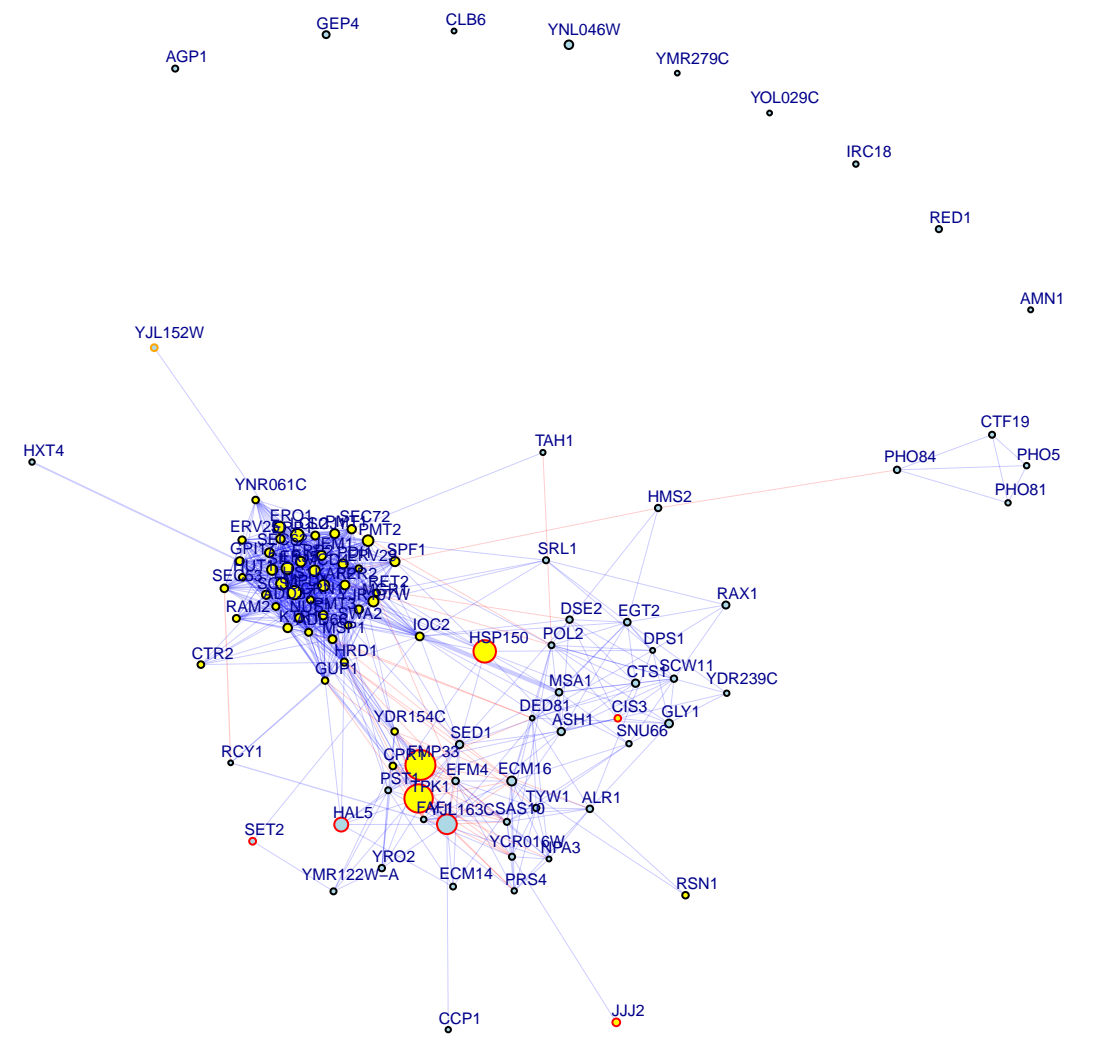

chrX:181214\_T/C top 50 up genes

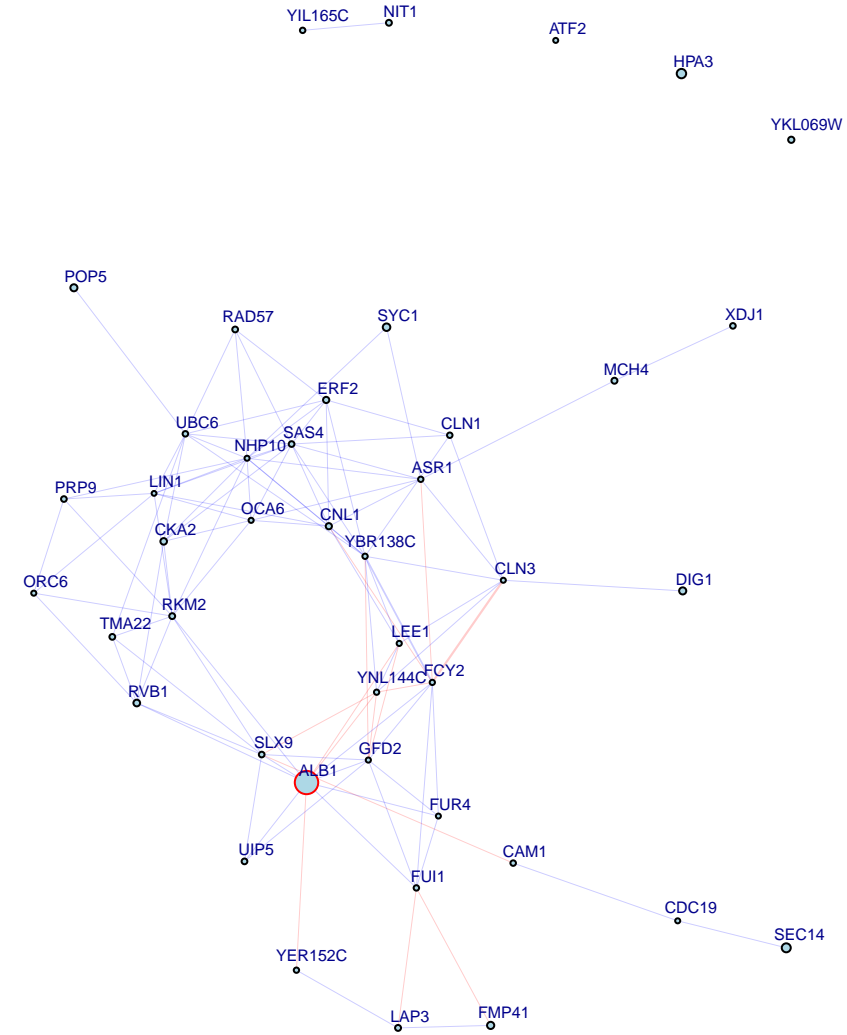

chrX:181214\_T/C top 50 down genes

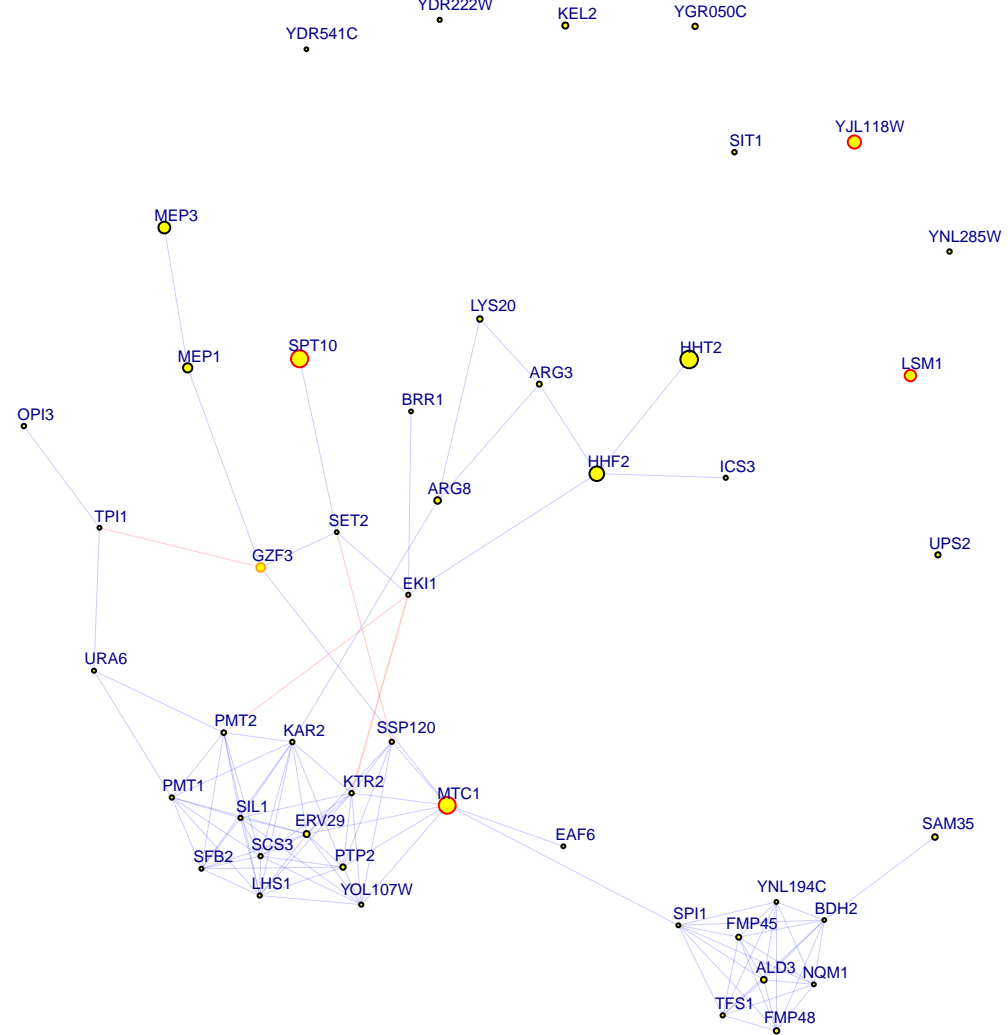

chrX:181214\_T/C top 100 up and down genes

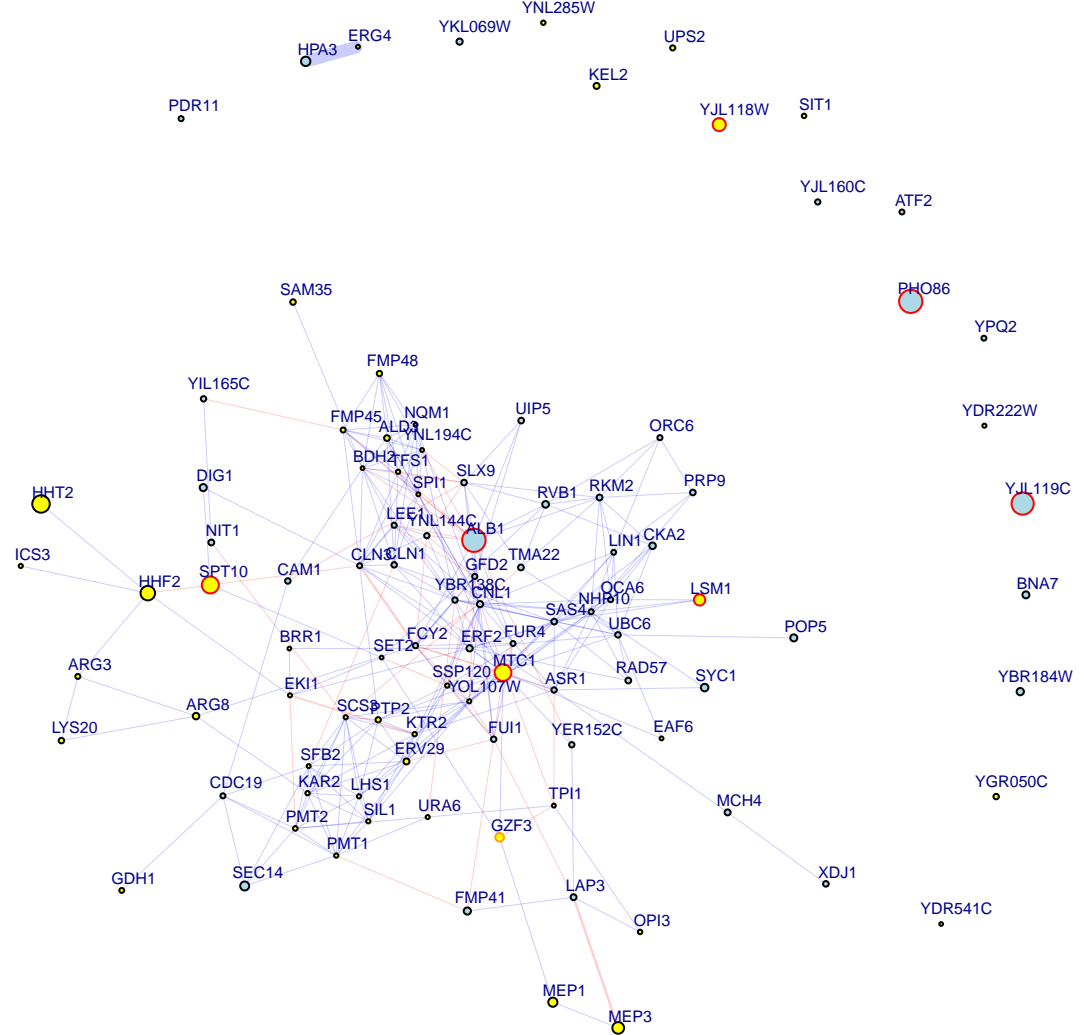





chrX:426287\_C/A top 50 up genes

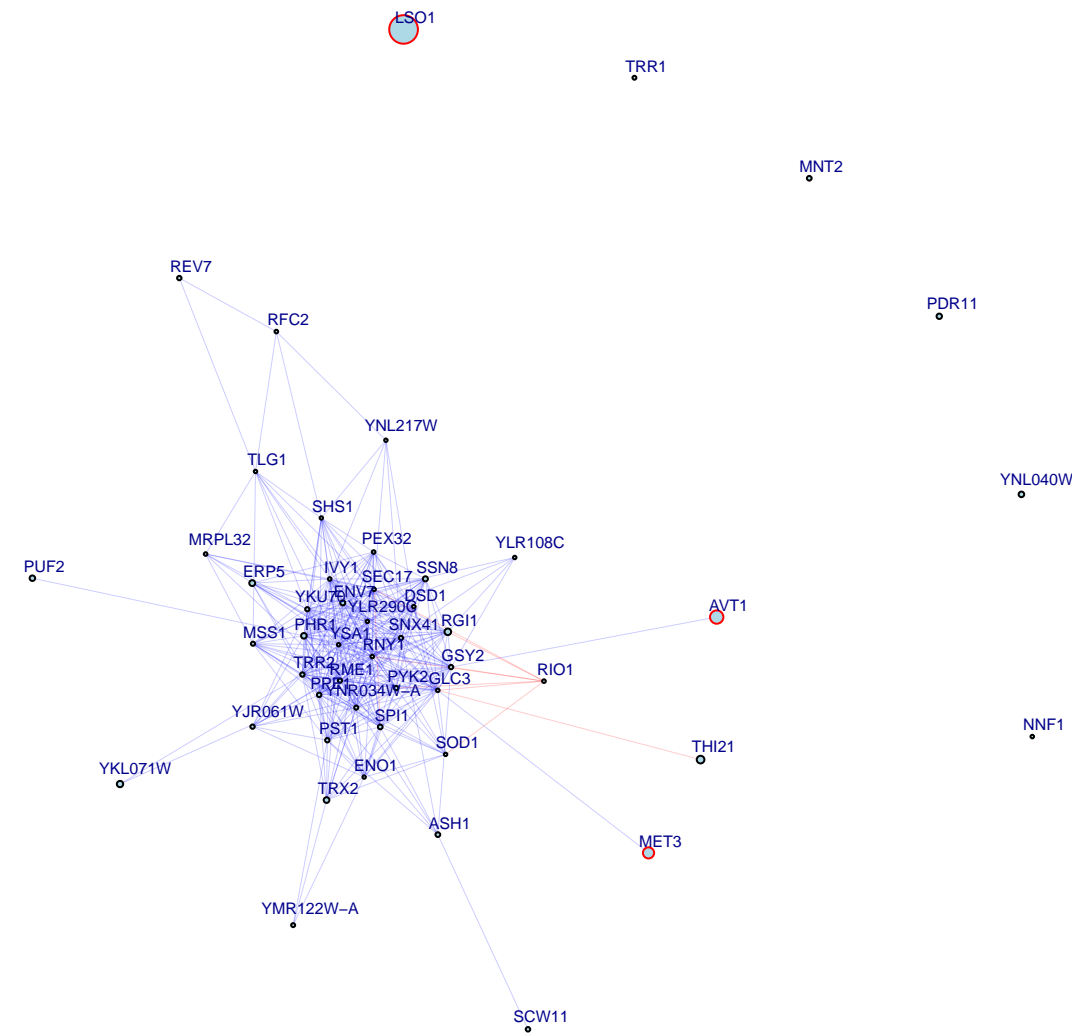

chrX:426287\_C/A top 50 down genes

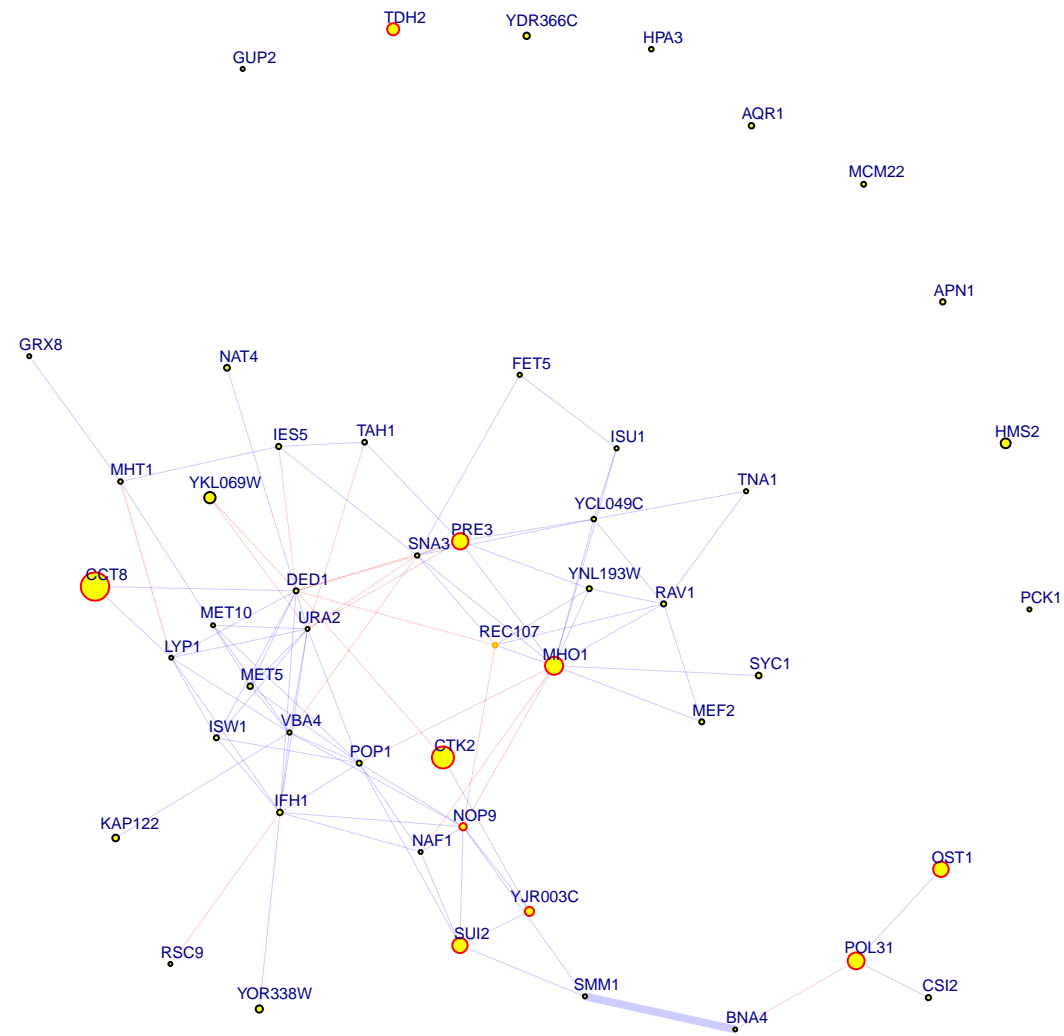

chrX:426287\_C/A top 100 up and down genes

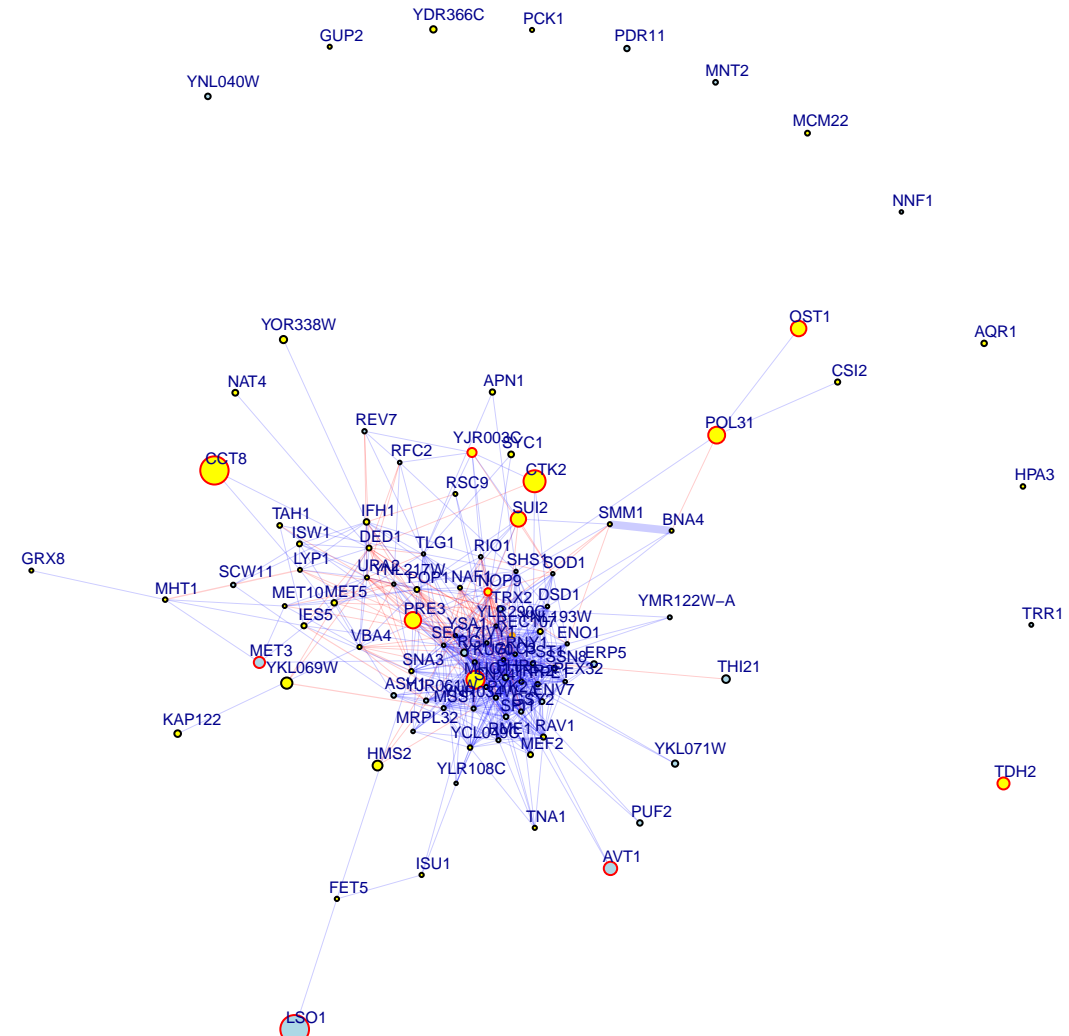

chrX:548174\_T/C top 50 up genes

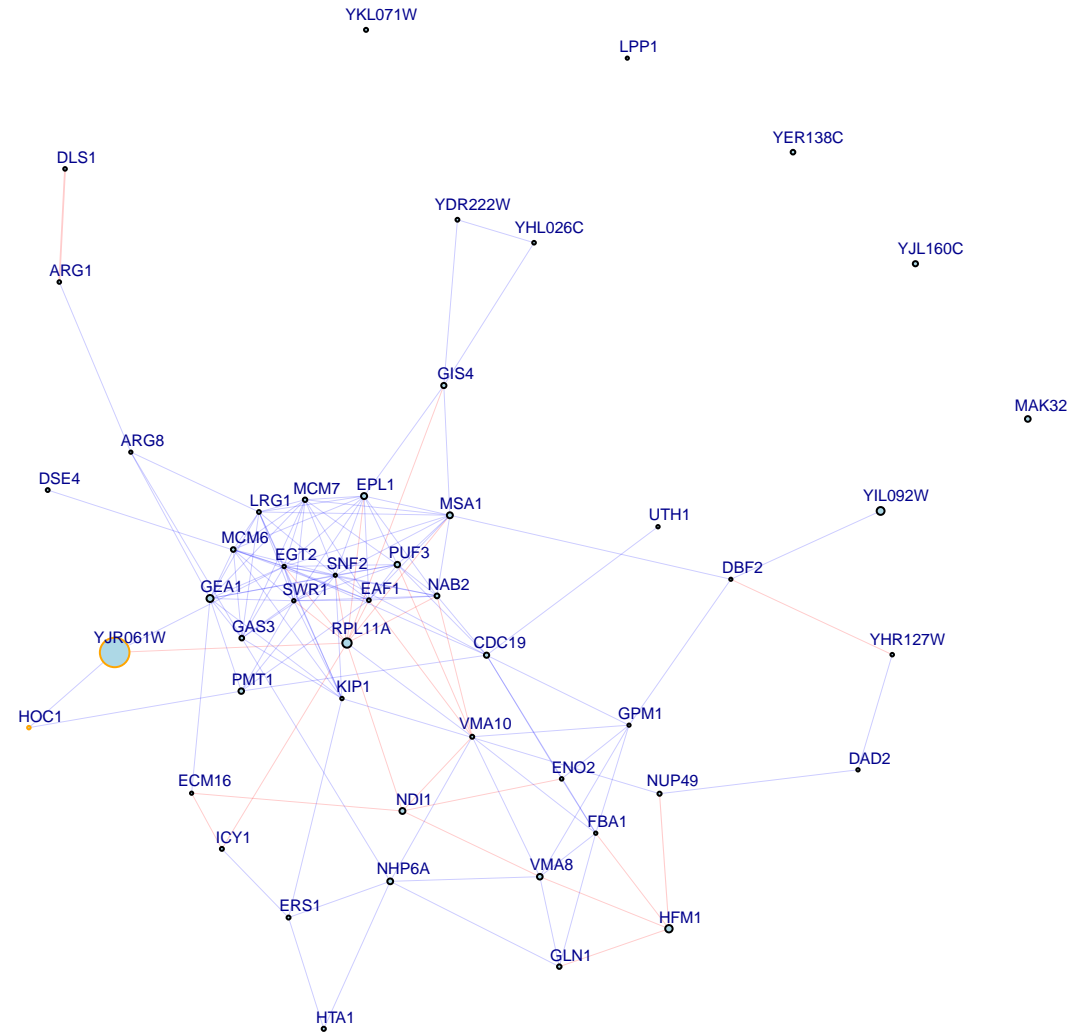

chrX:548174\_T/C top 50 down genes

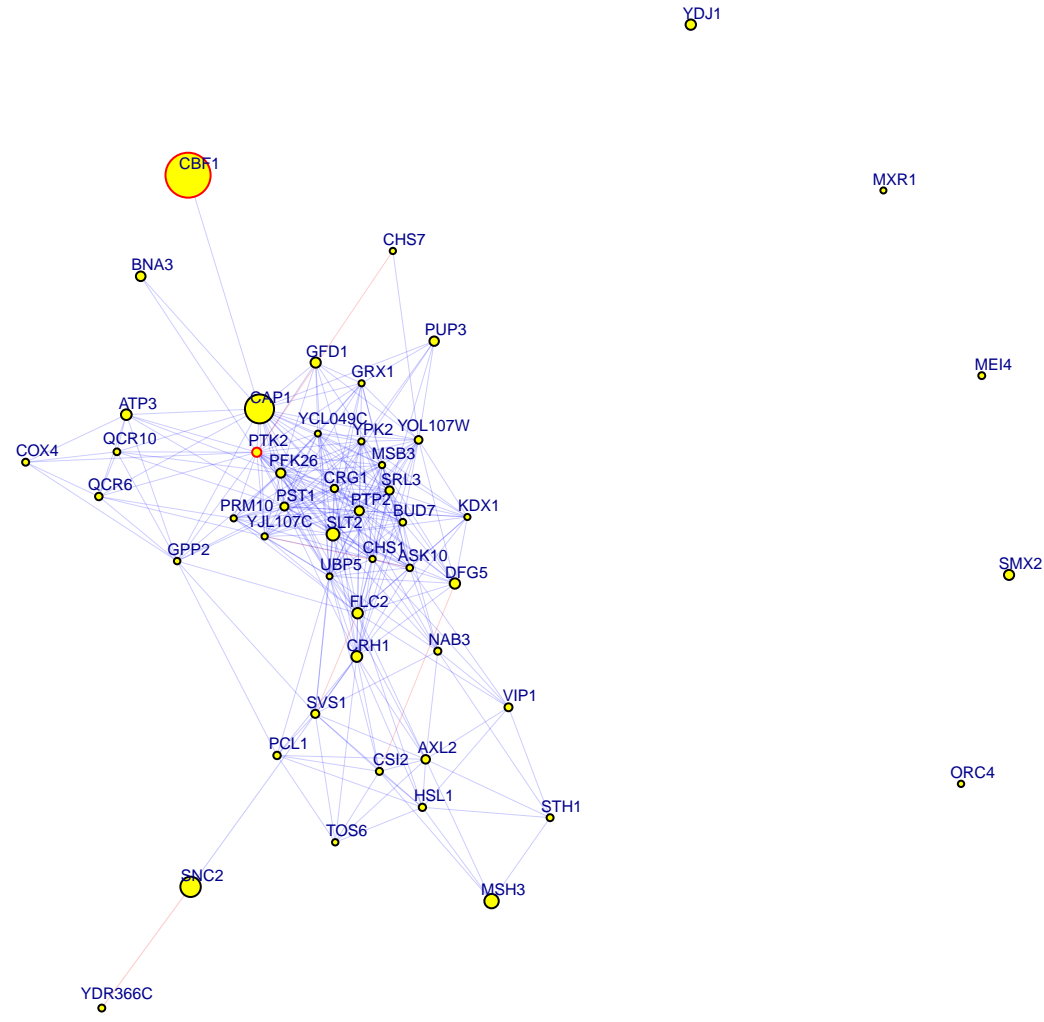

chrX:548174\_T/C top 100 up and down genes

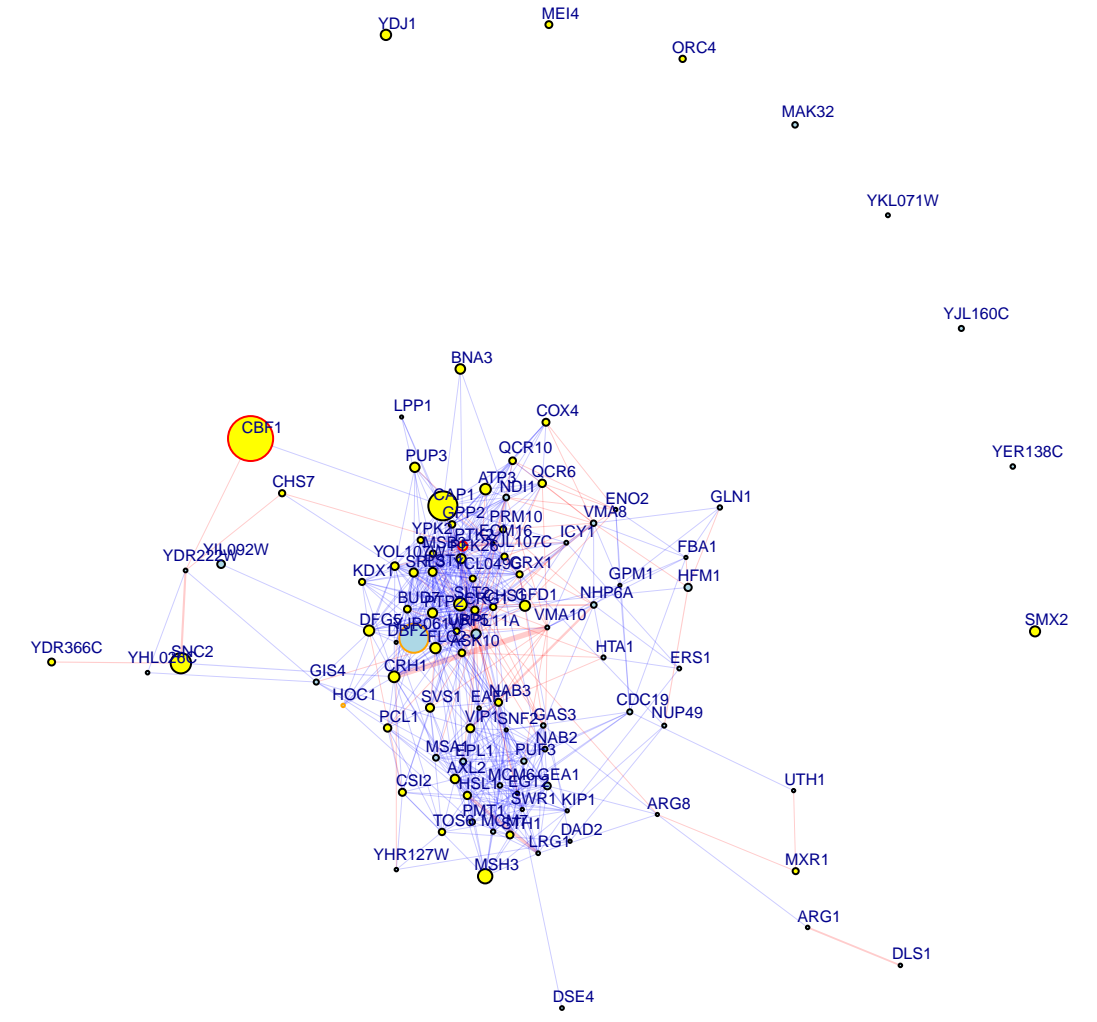



chrX:722130\_T/C top 50 up genes

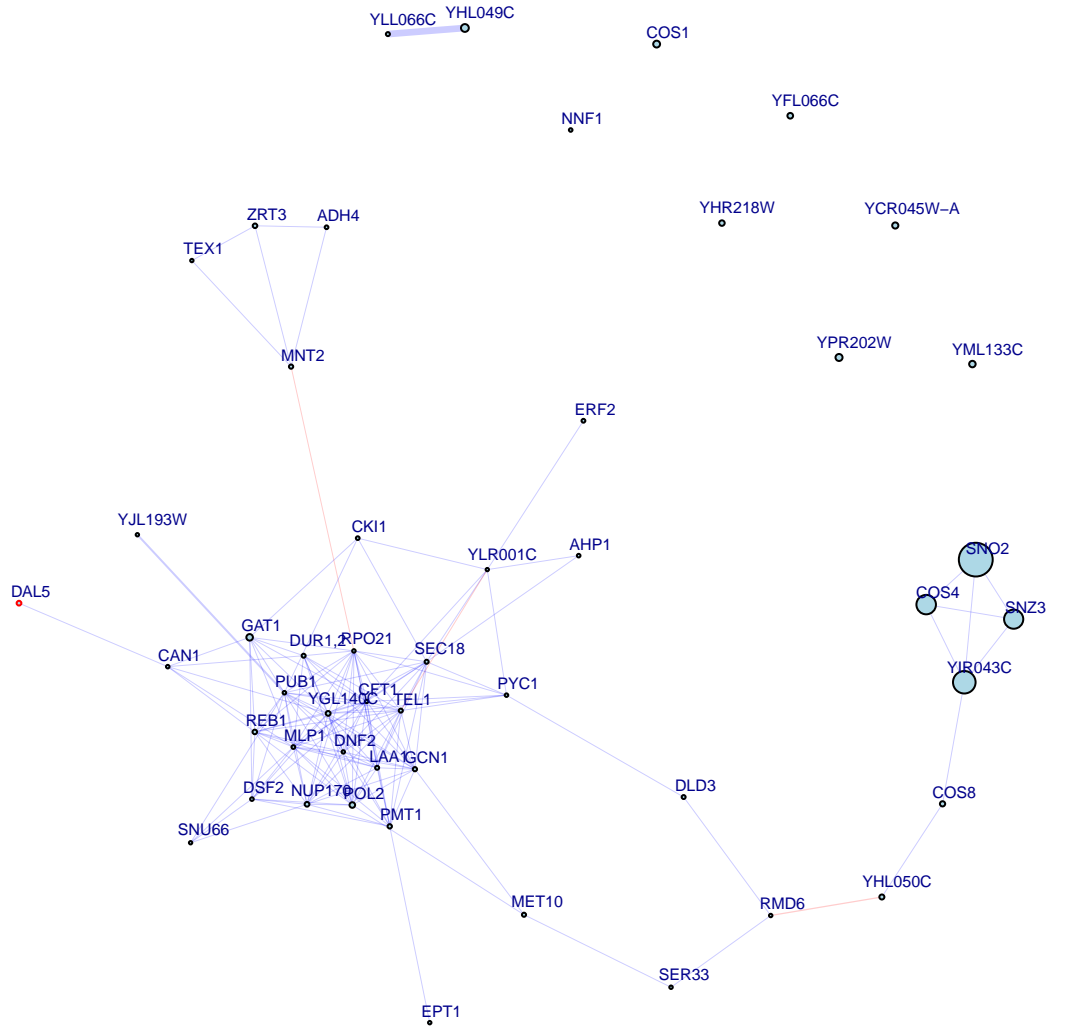

chrX:722130\_T/C top 35 down genes

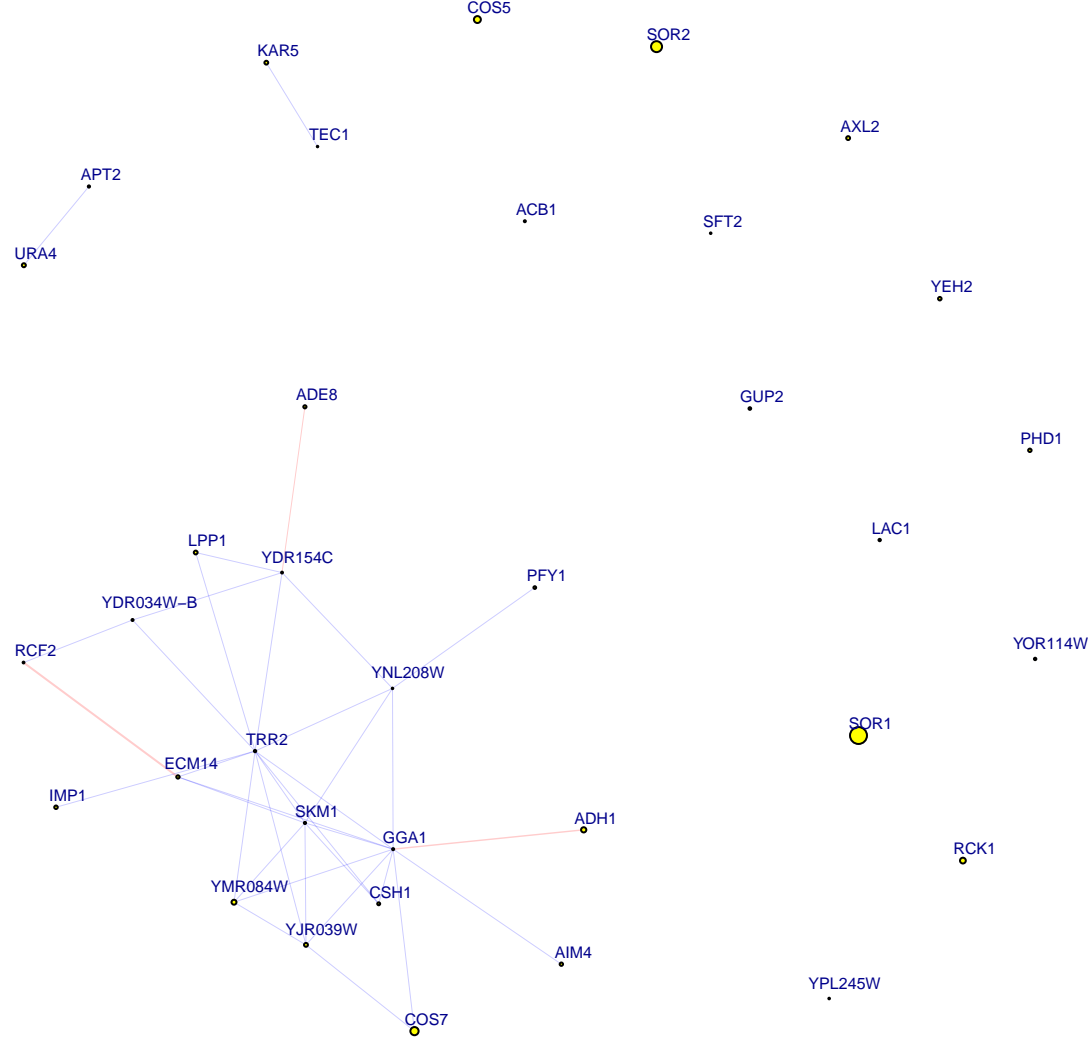

chrX:722130\_T/C top 85 up and down genes

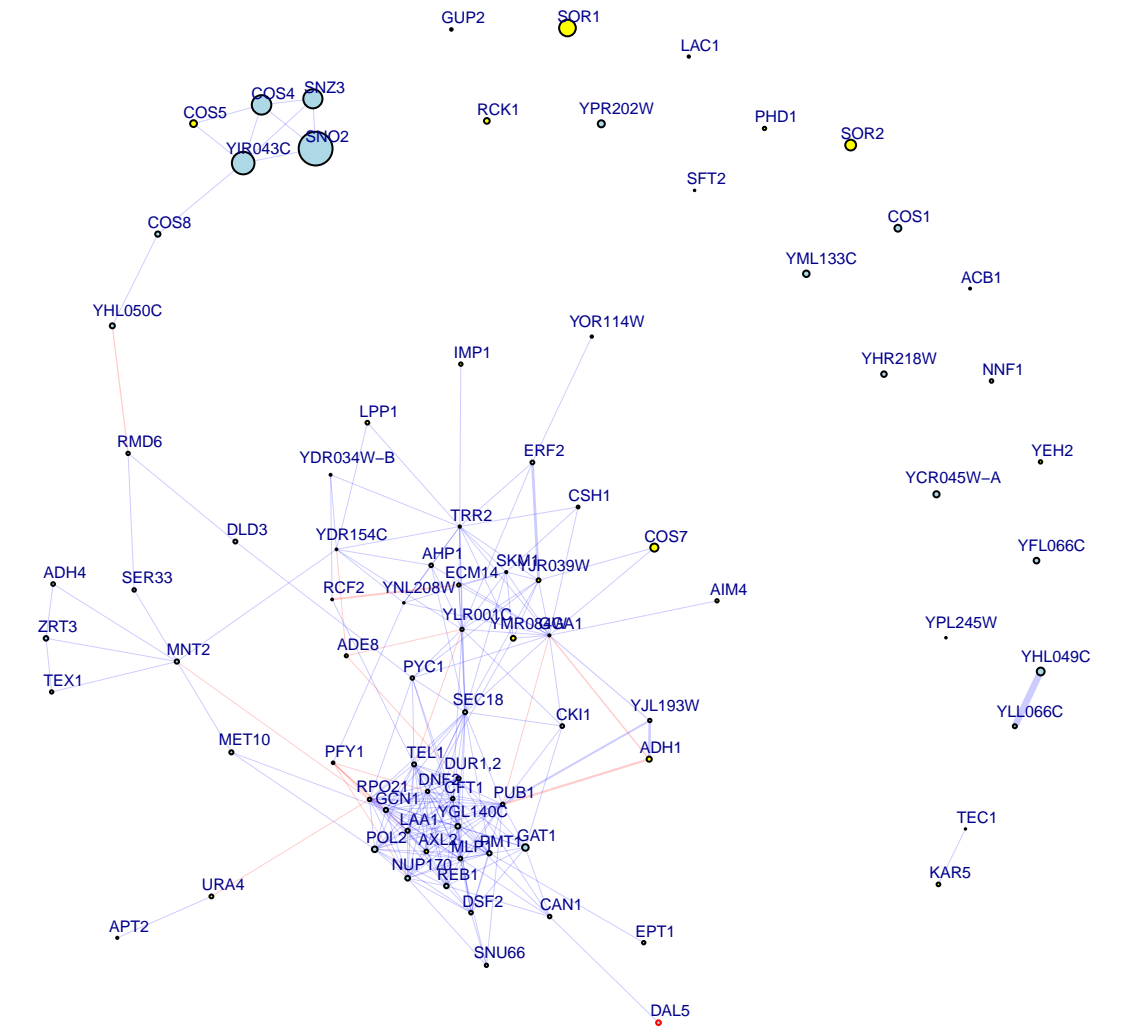

chrXI:4534\_G/A top 34 up genes

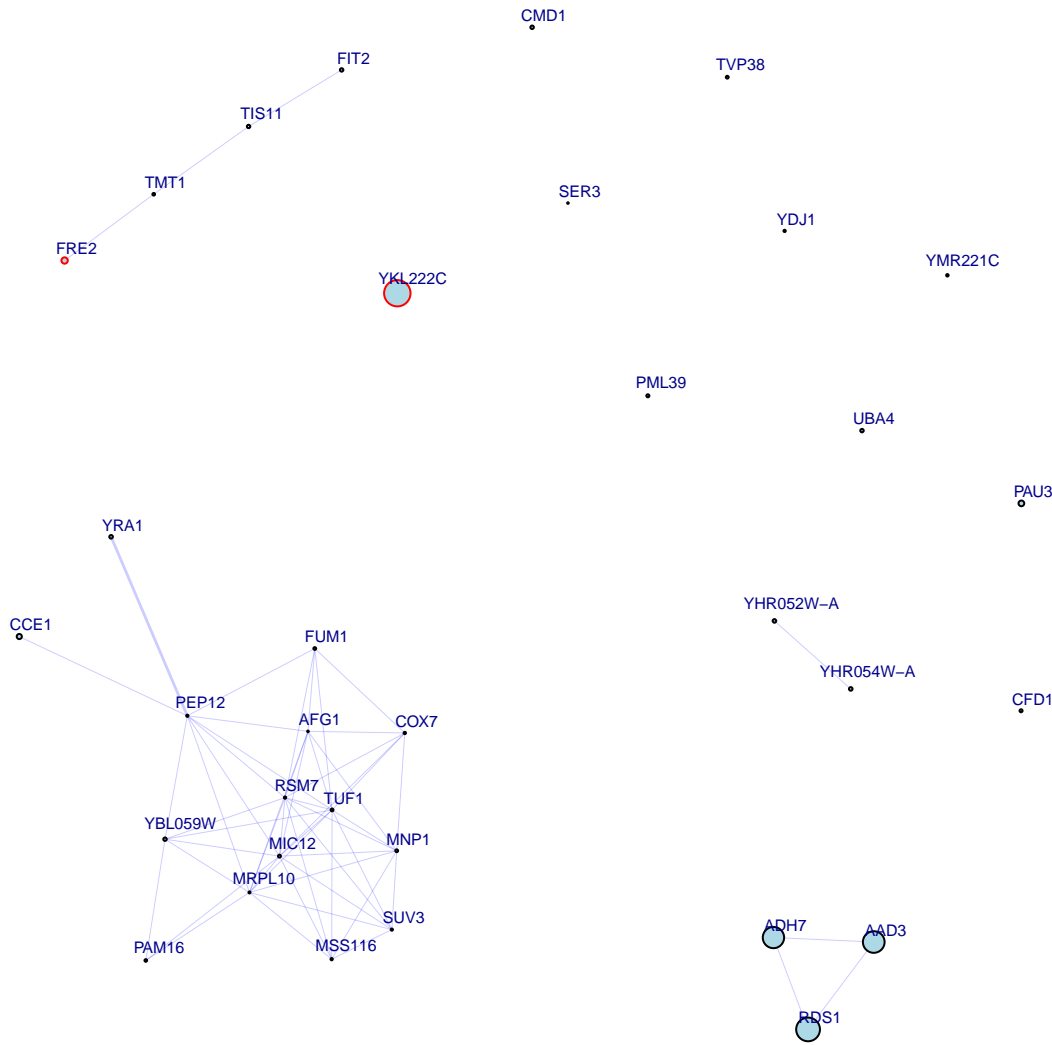

chrXI:4534\_G/A top 50 down genes

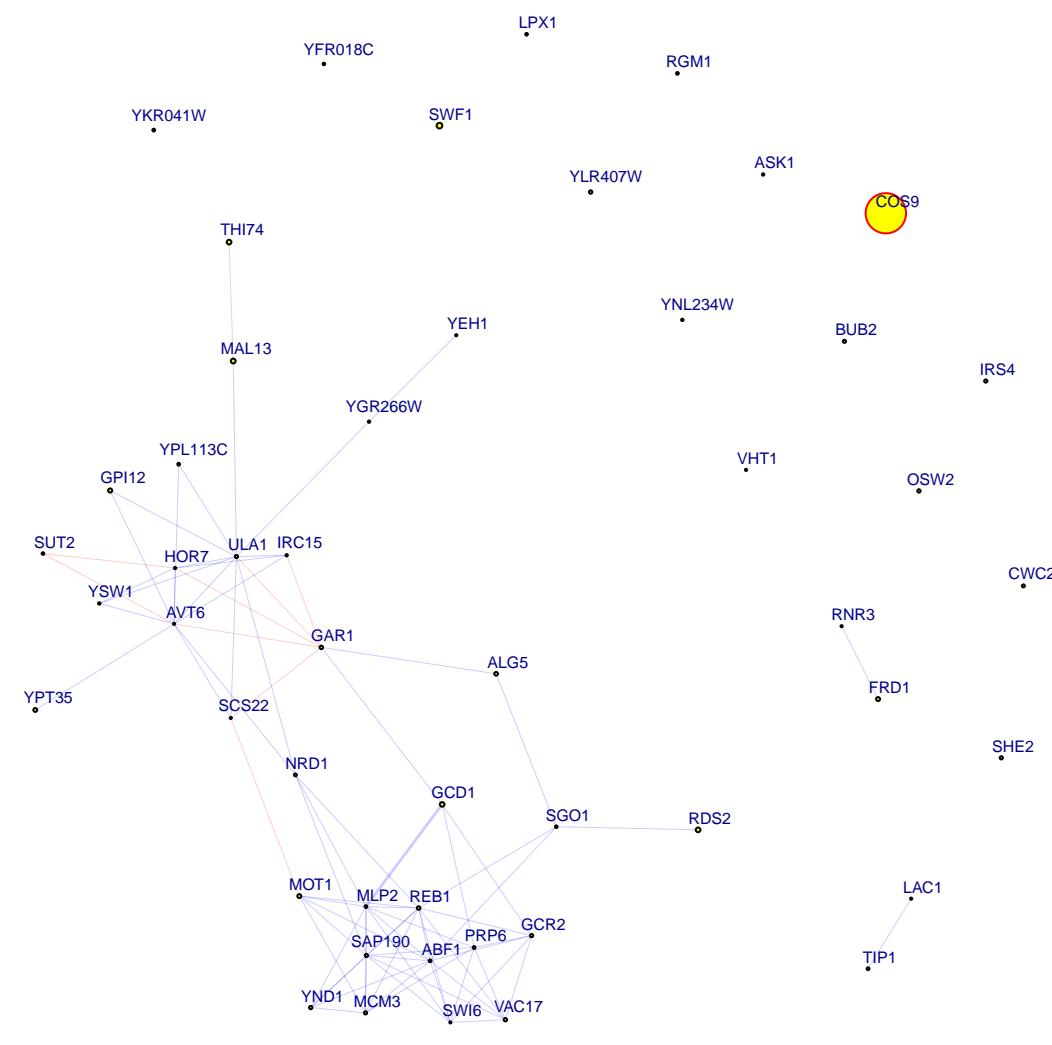

chrXI:4534\_G/A top 84 up and down genes

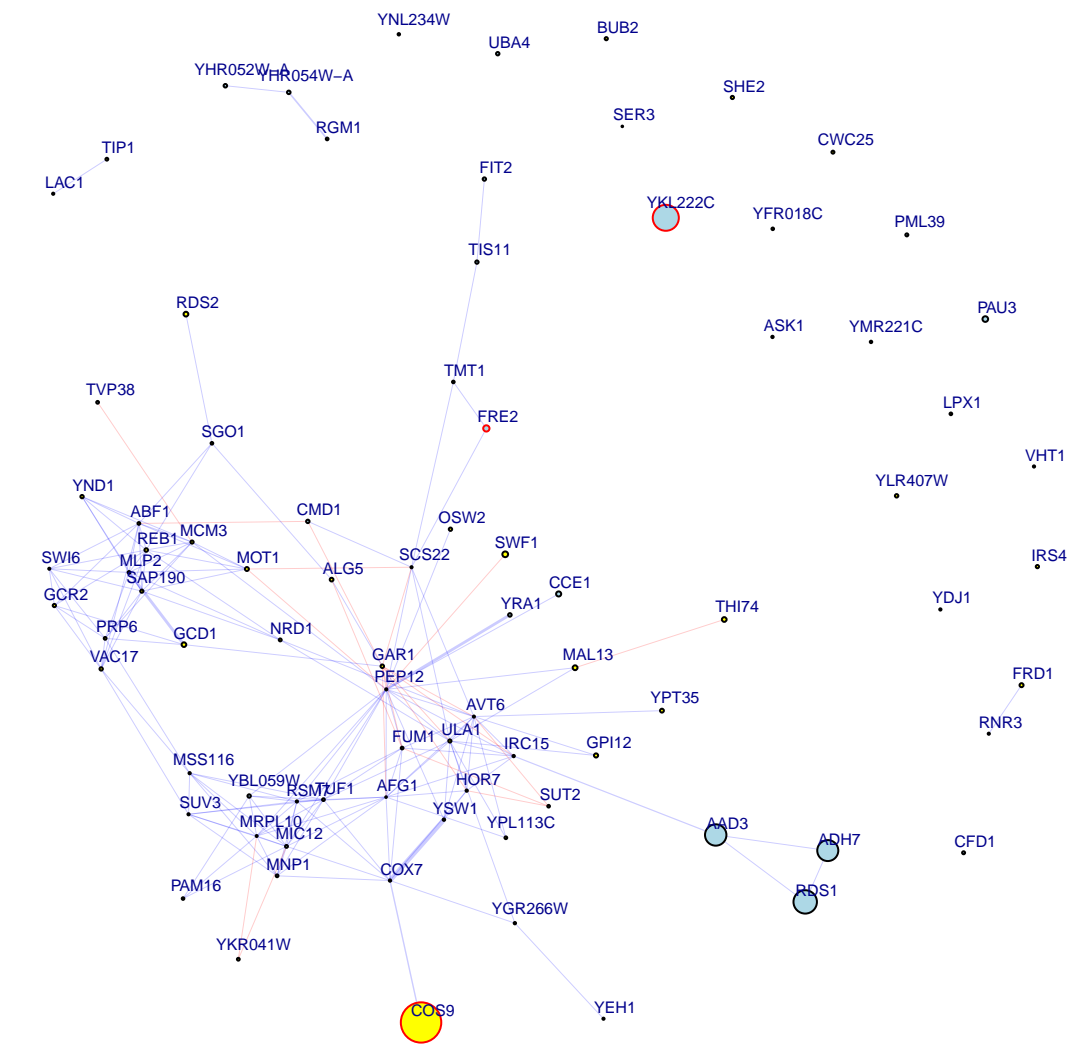

chrXI:102908\_C/T top 50 up genes

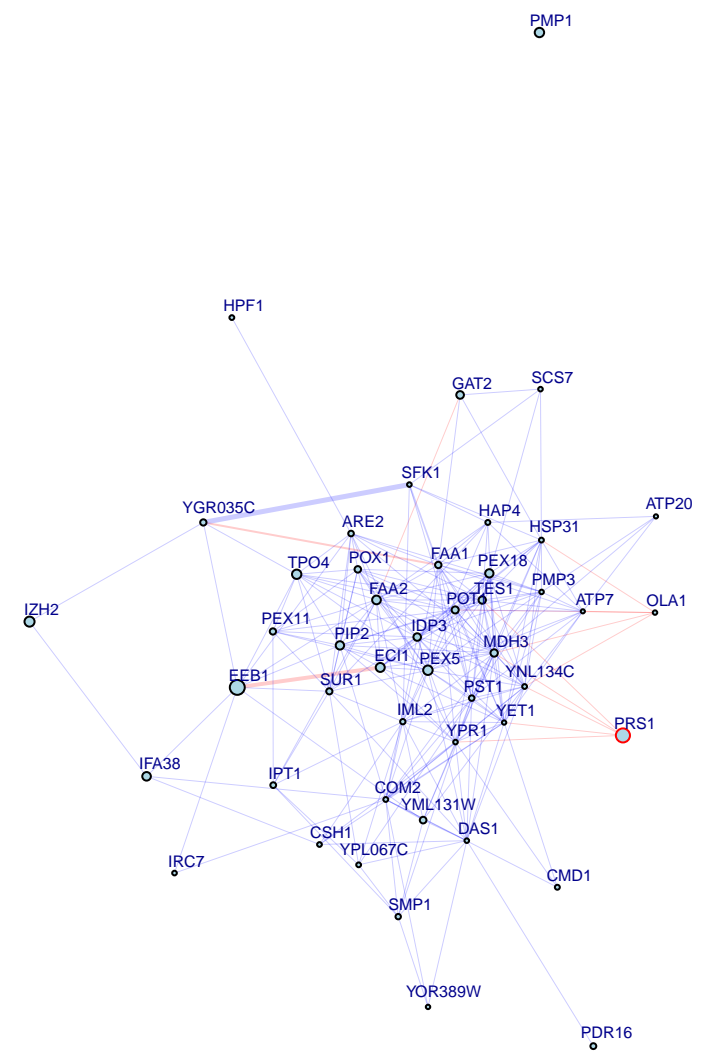

chrXI:102908\_C/T top 50 down genes

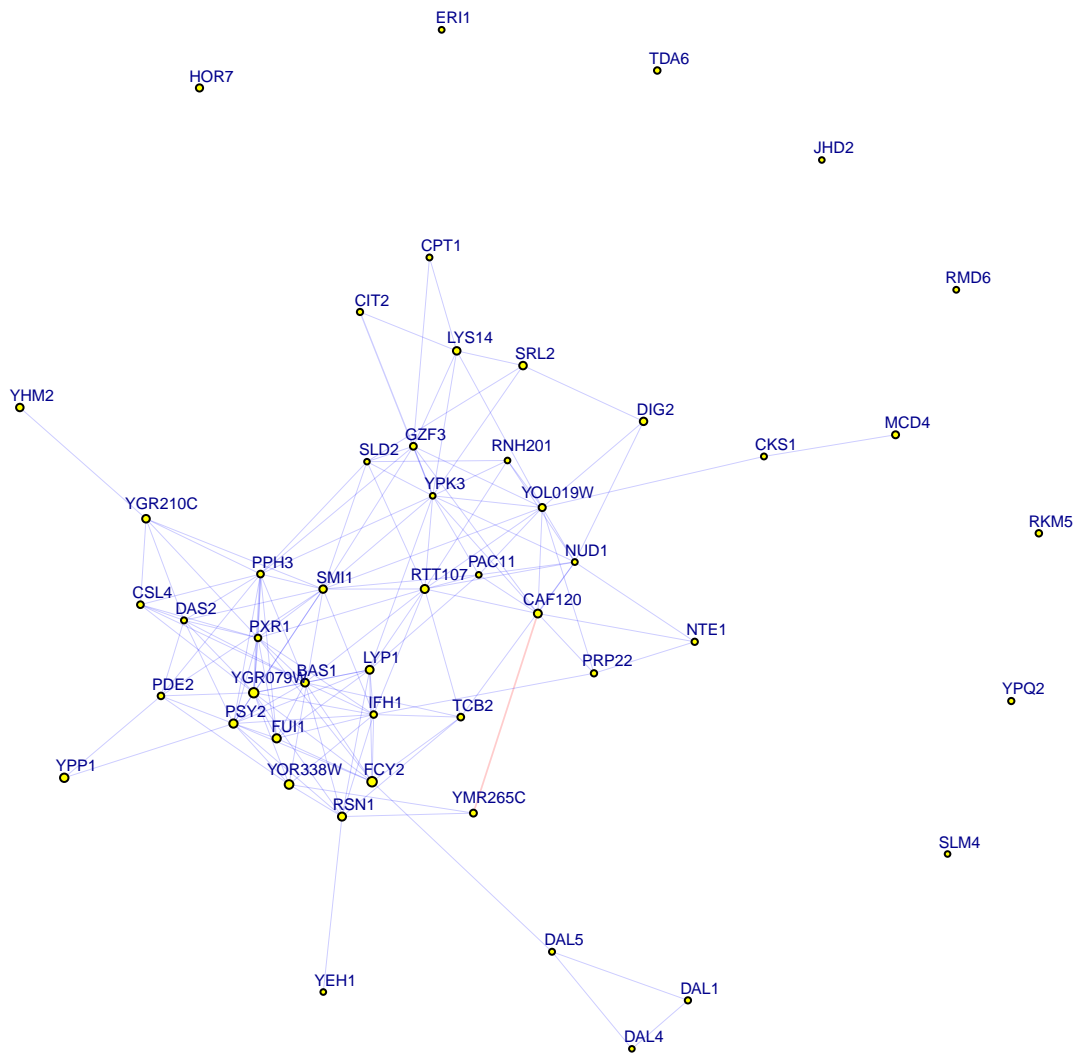

chrXI:102908\_C/T top 100 up and down genes

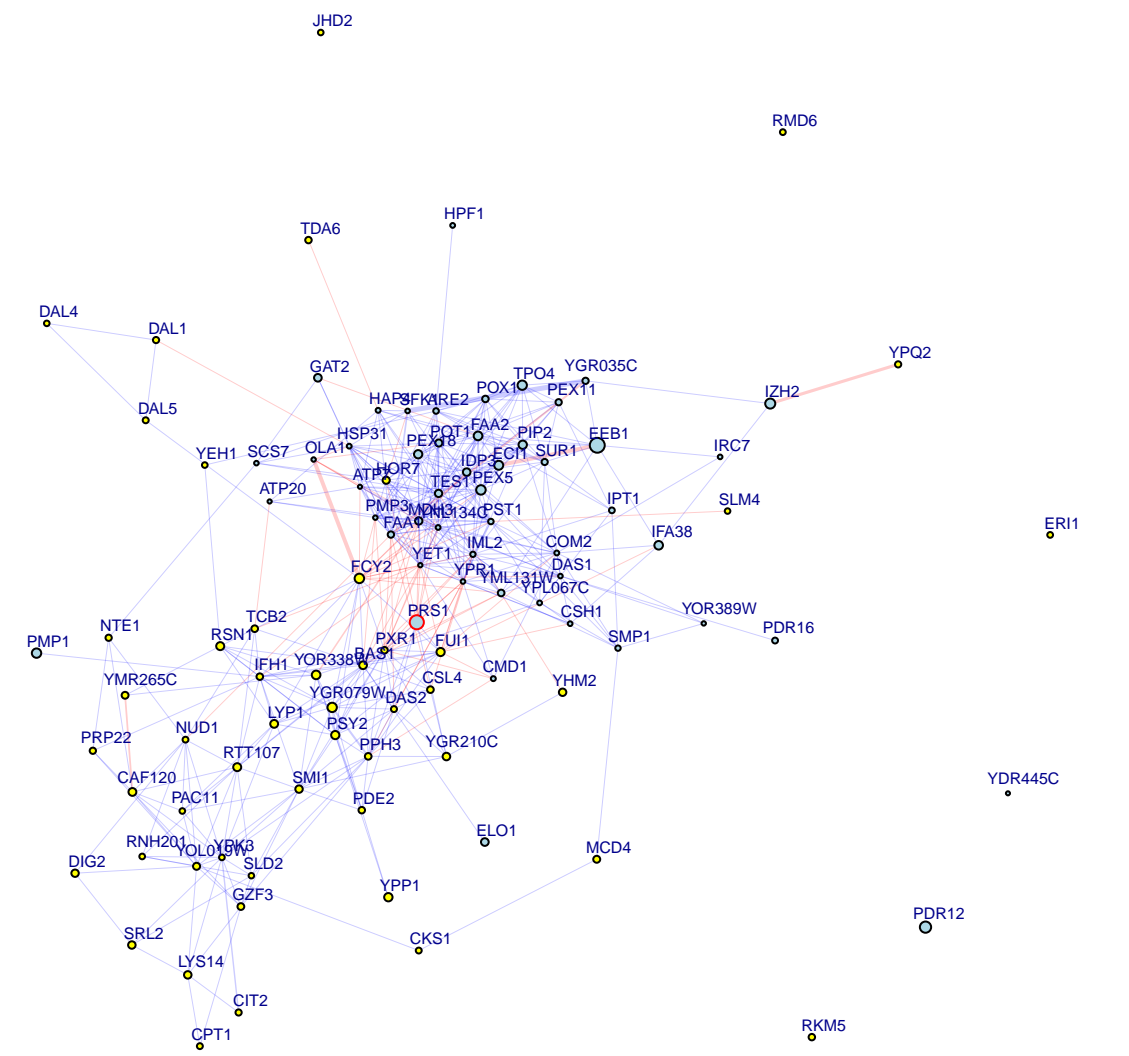

chrXI:232667\_A/T top 50 up genes

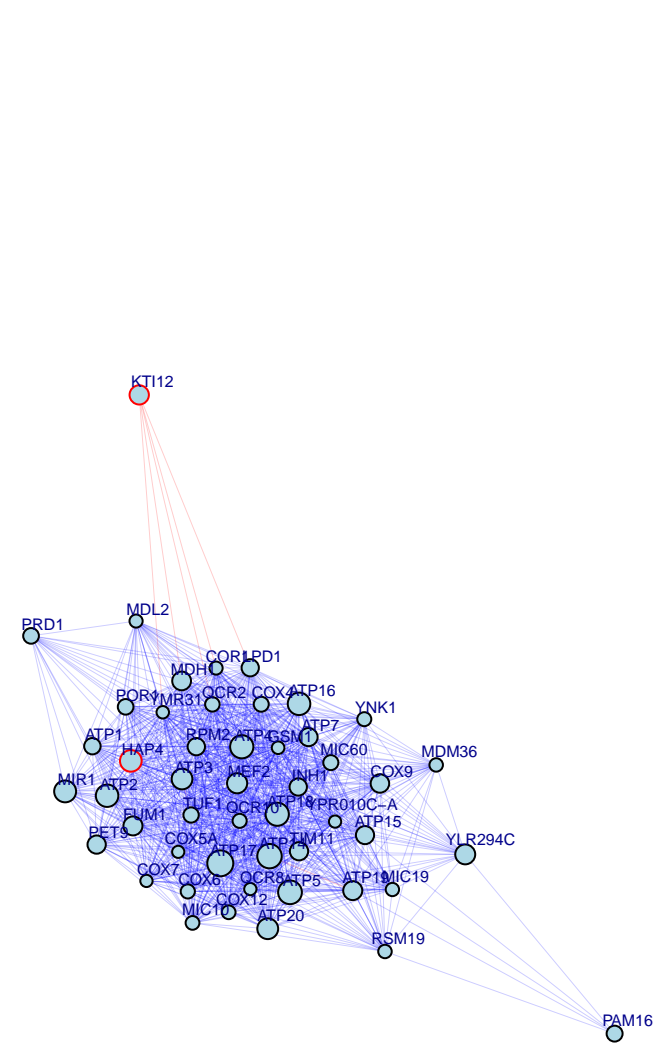

chrXI:232667\_A/T top 50 down genes

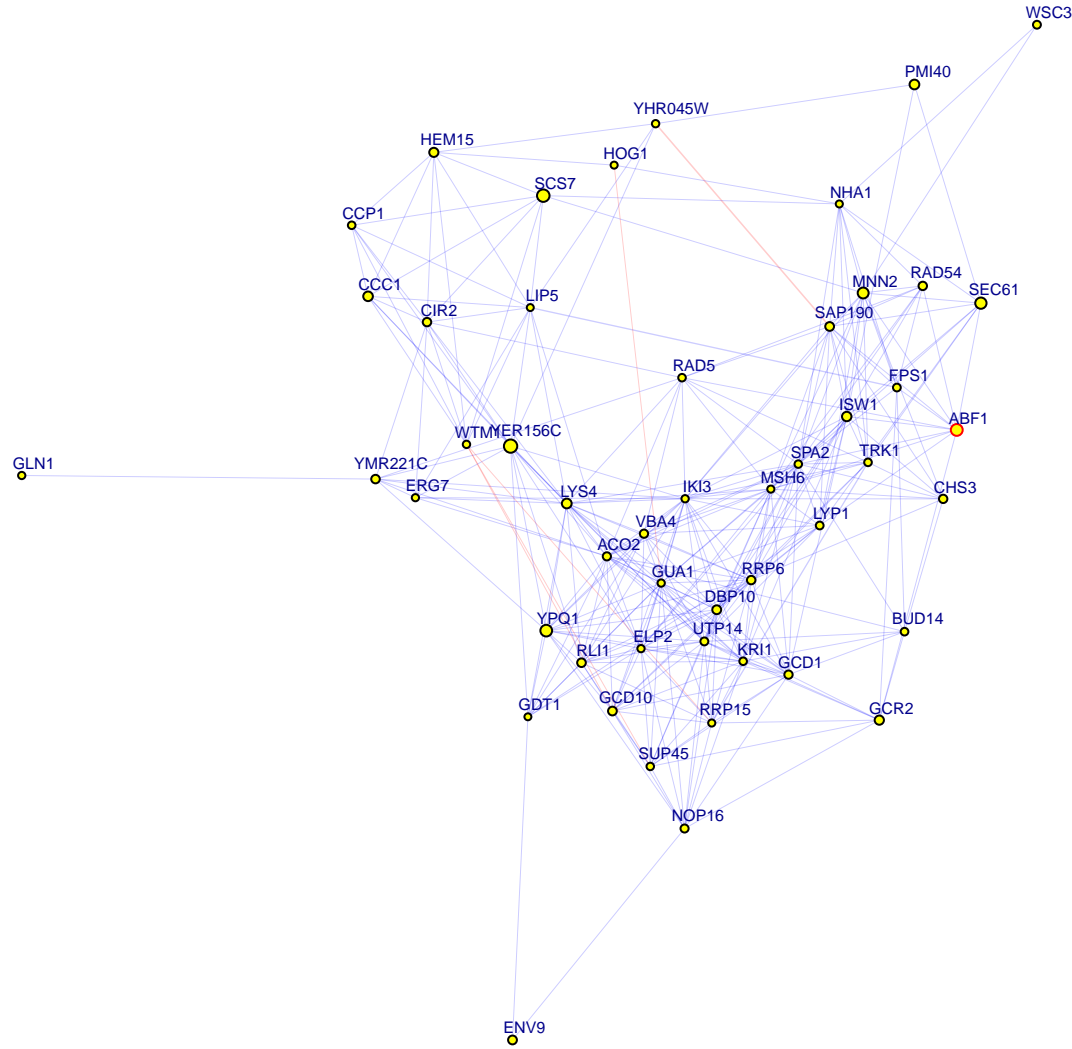

chrXI:232667\_A/T top 100 up and down genes

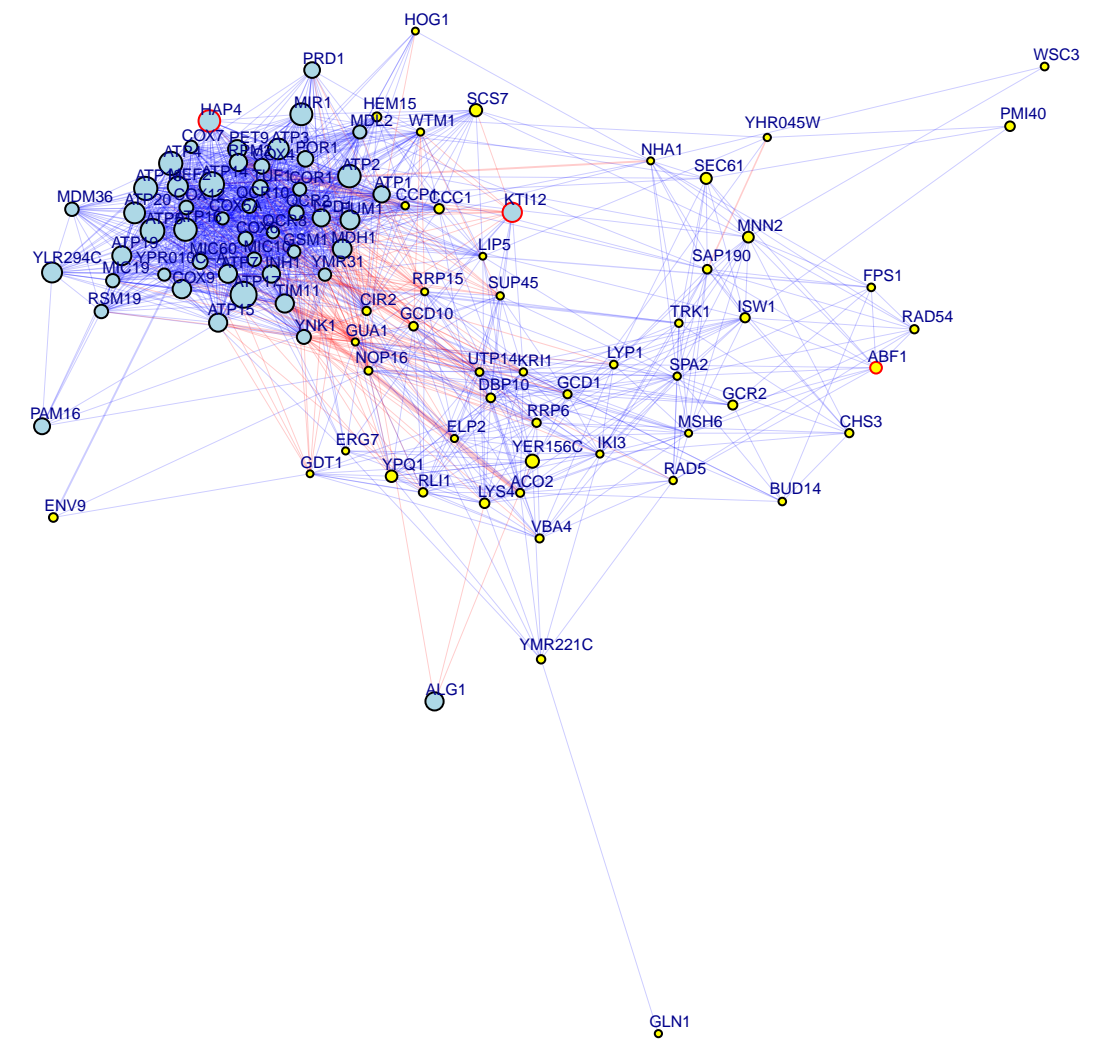

chrXI:411756\_T/C top 50 up genes

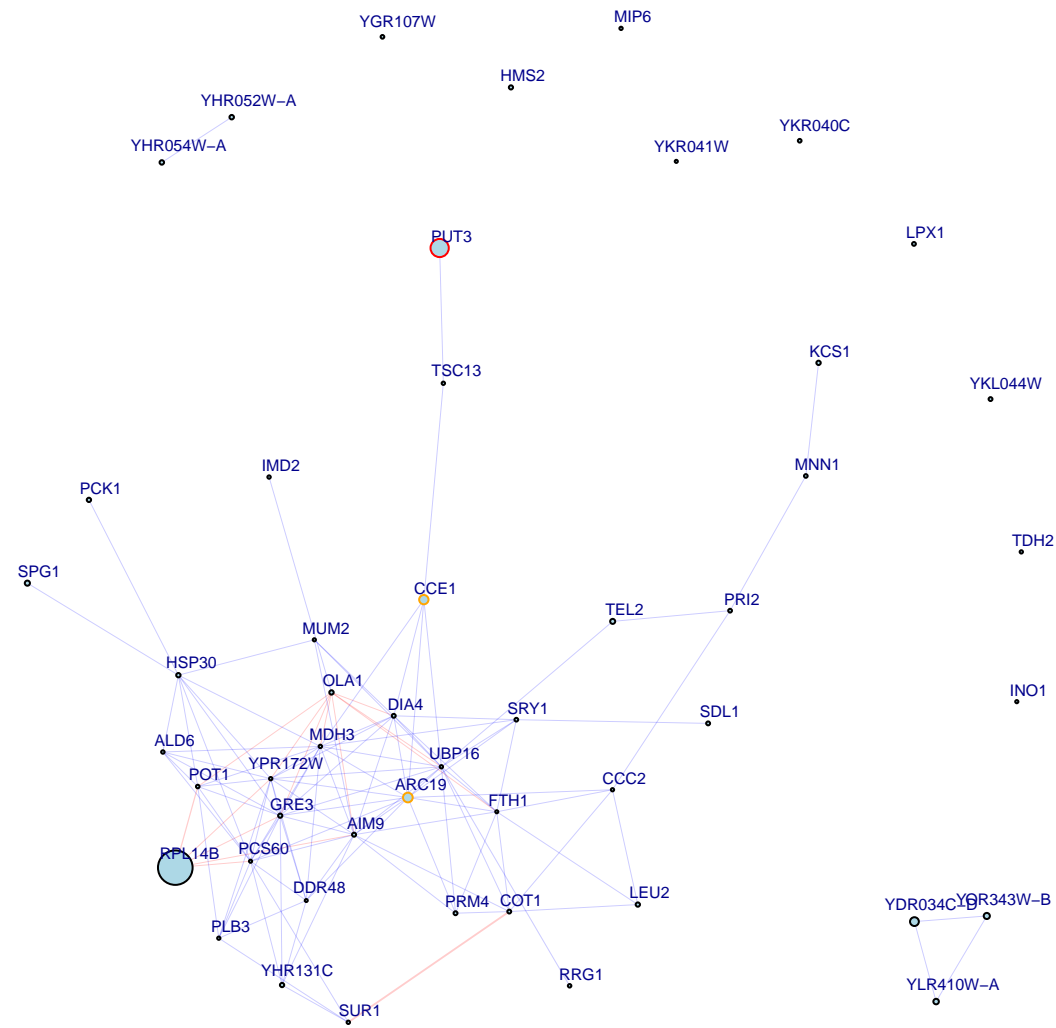

chrXI:411756\_T/C top 50 down genes

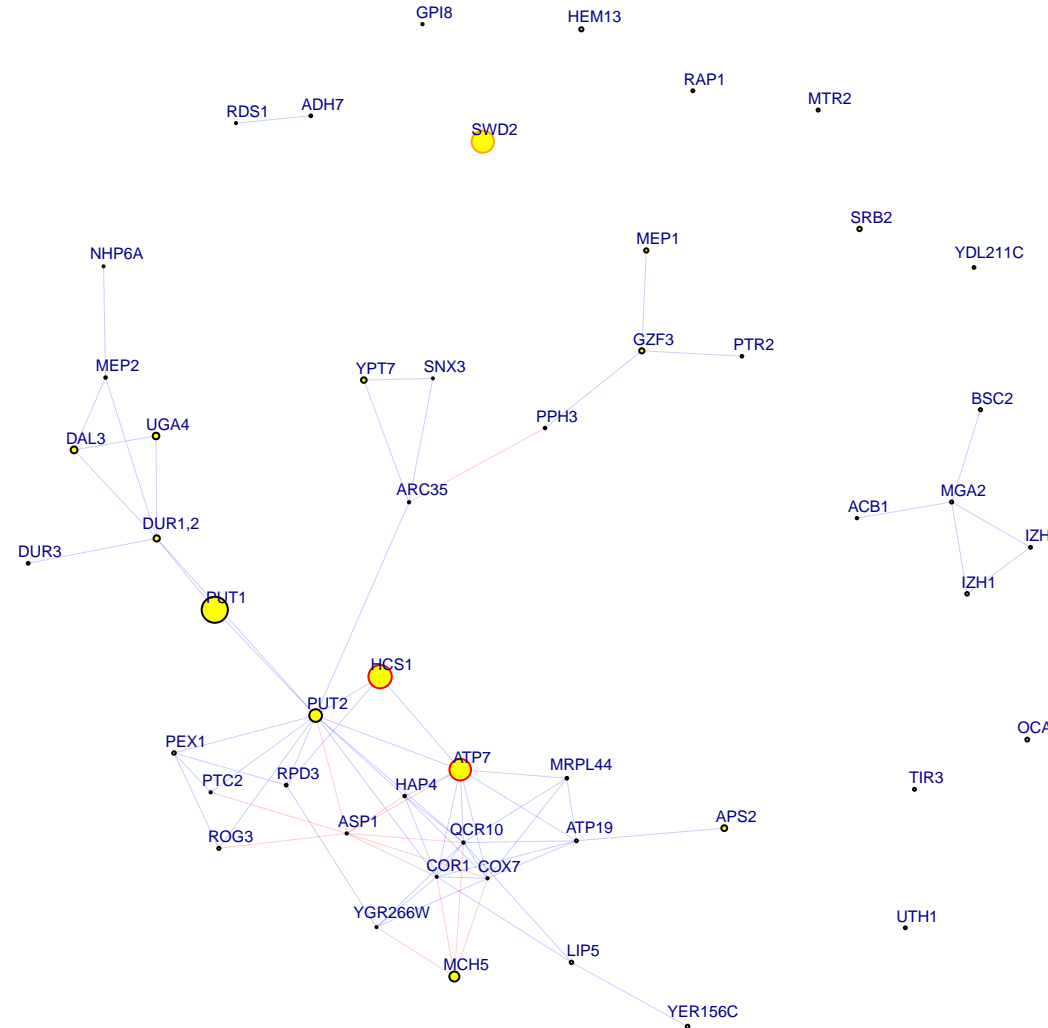

chrXI:411756\_T/C top 100 up and down genes

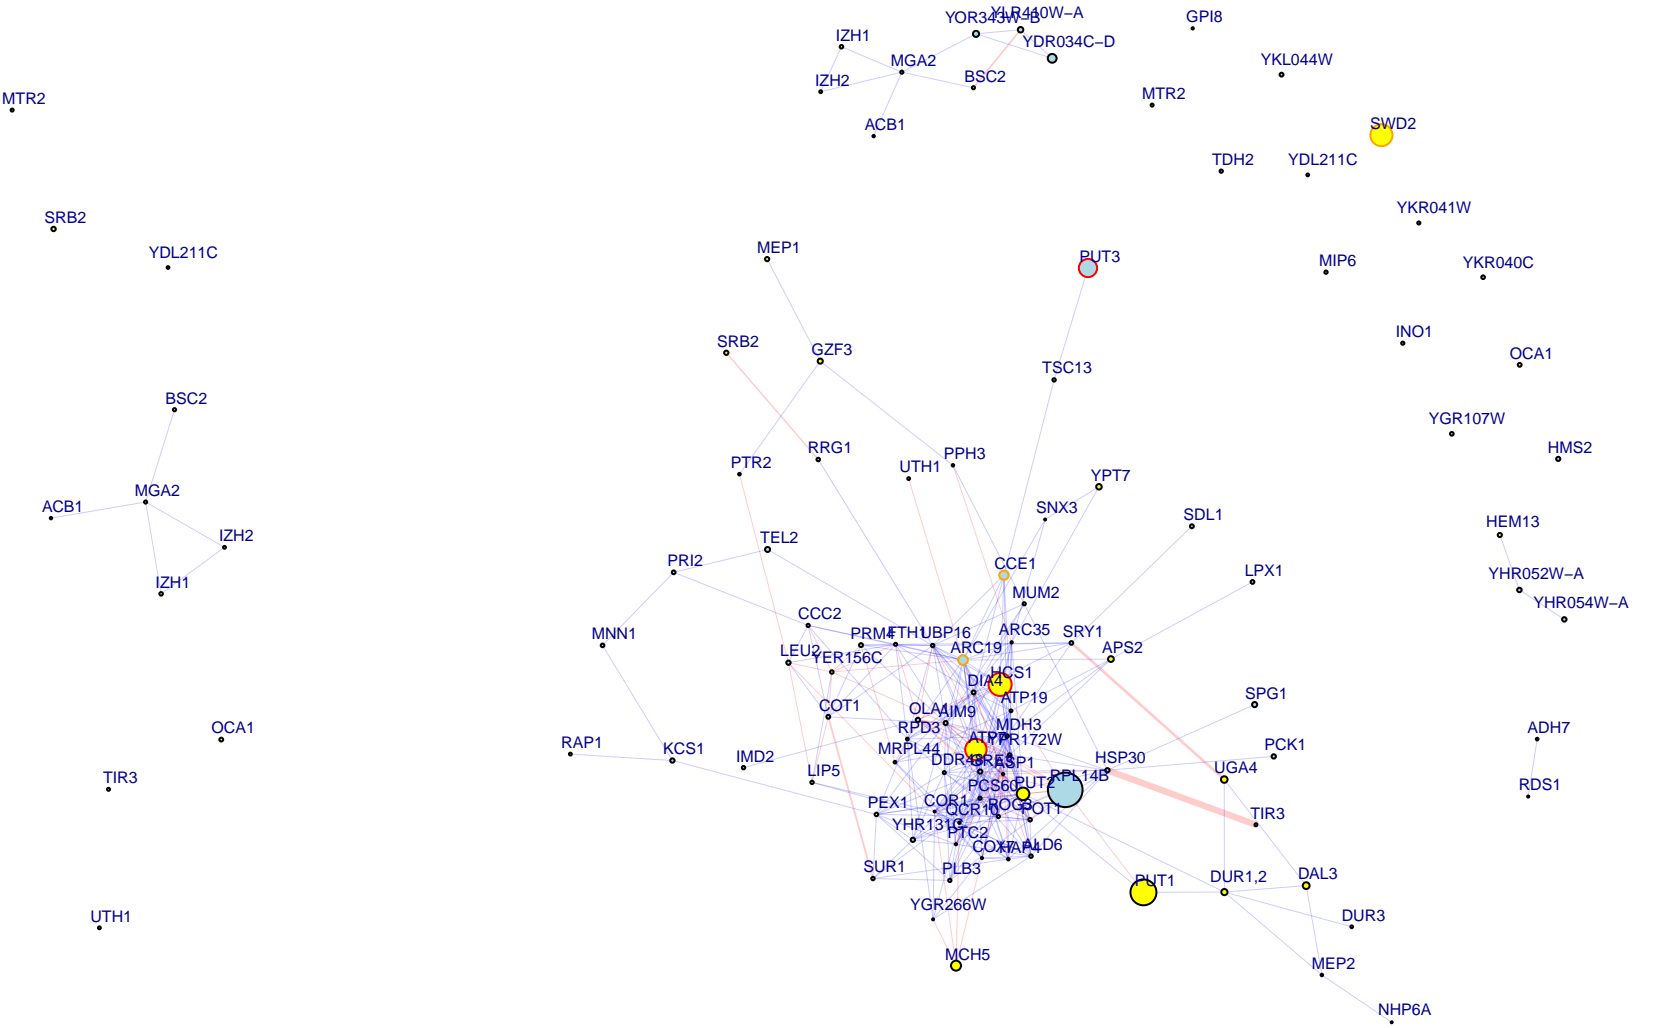



chrXI:533229\_G/C top 50 up genes

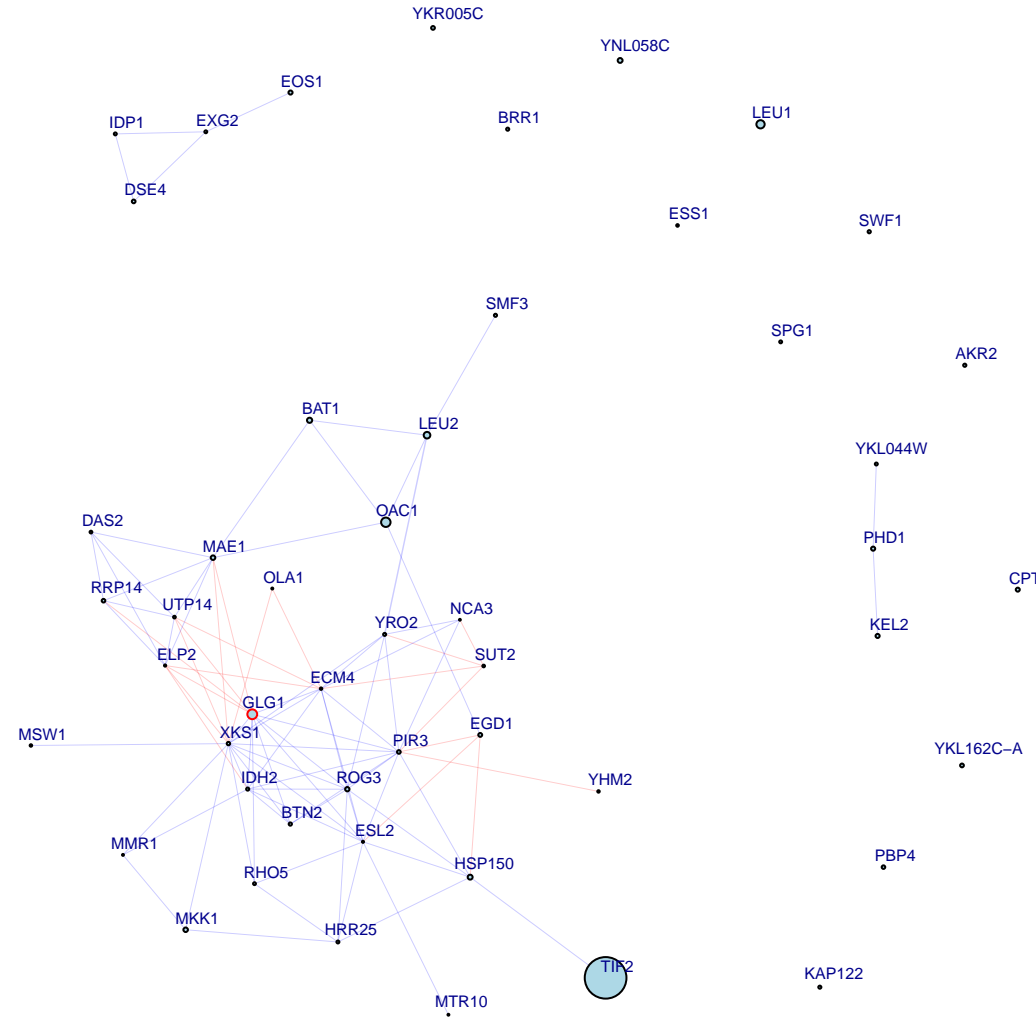

chrXI:533229\_G/C top 50 down genes

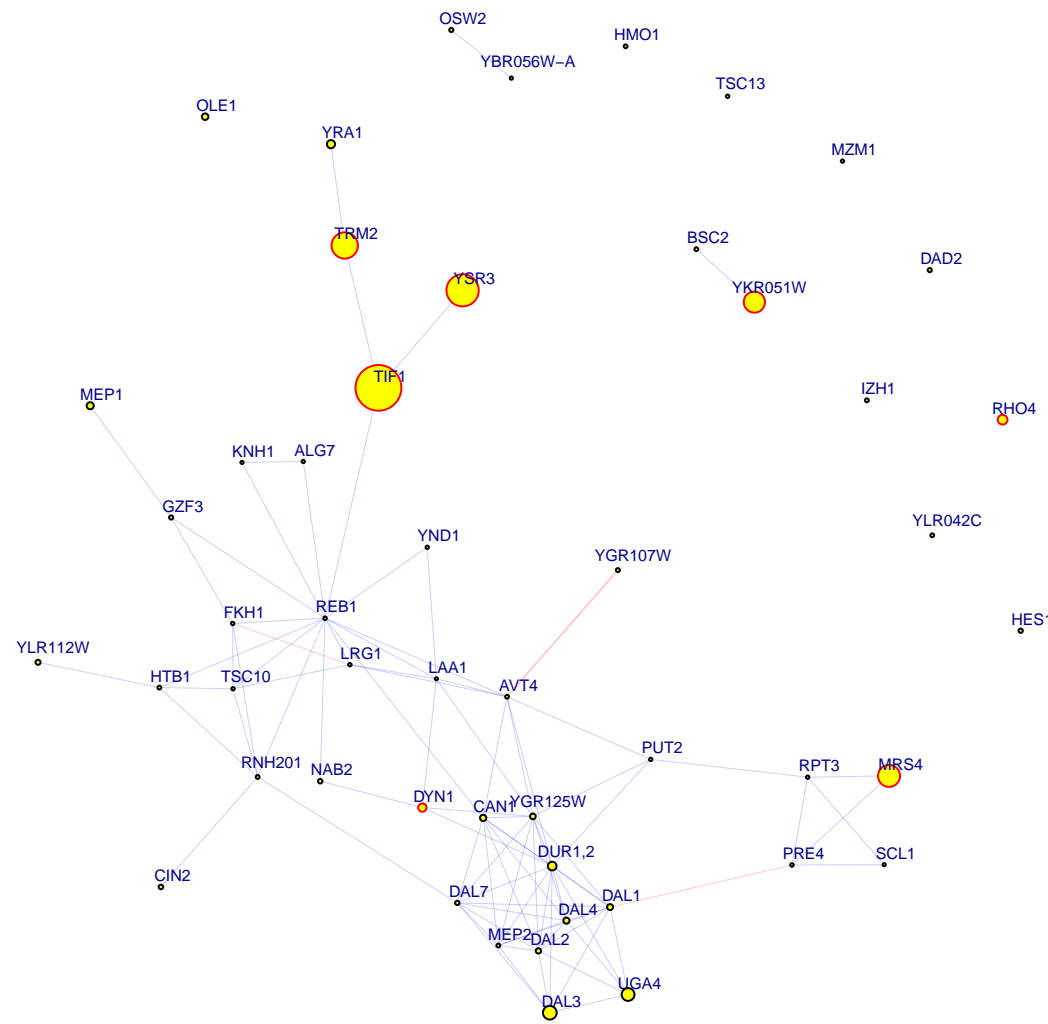

chrXI:533229\_G/C top 100 up and down genes

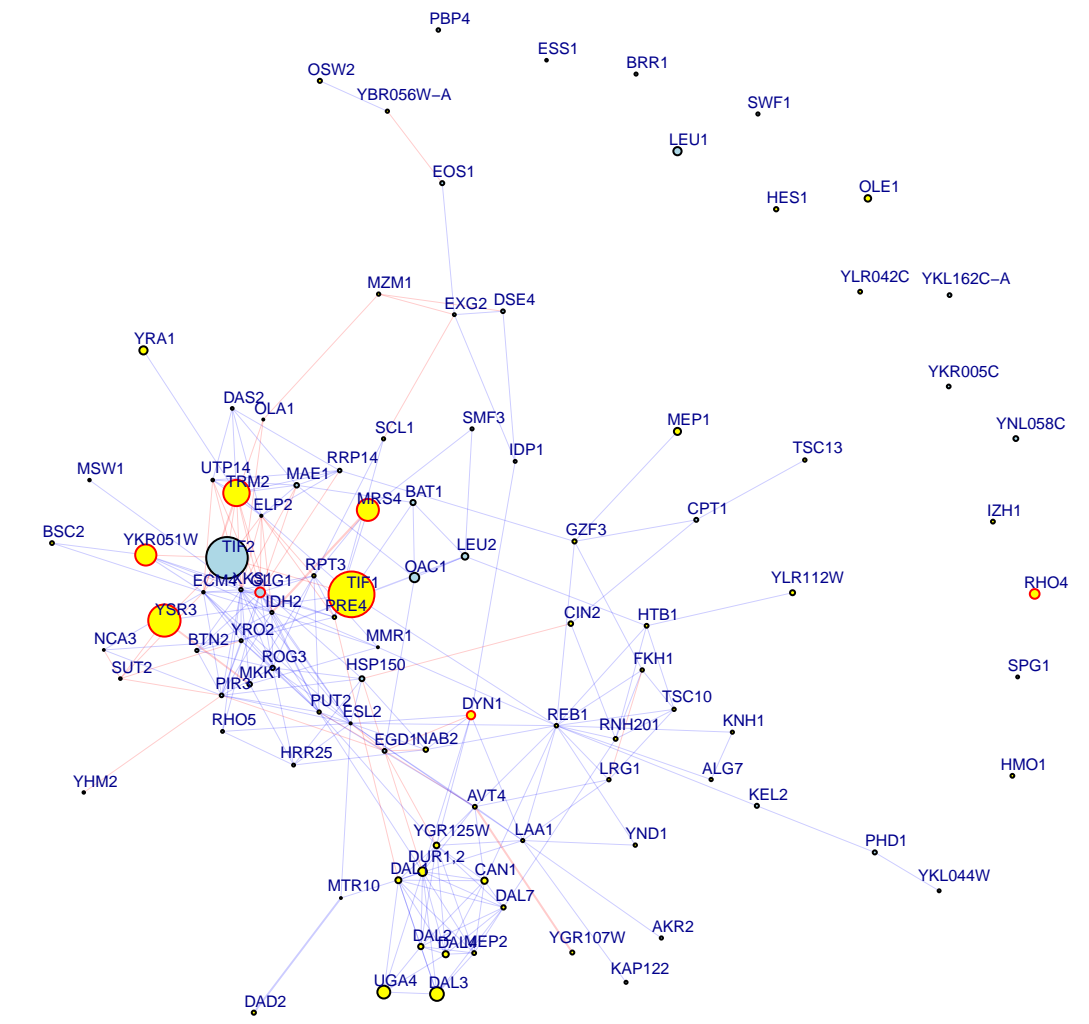

chrXI:641098\_A/G top 50 up genes

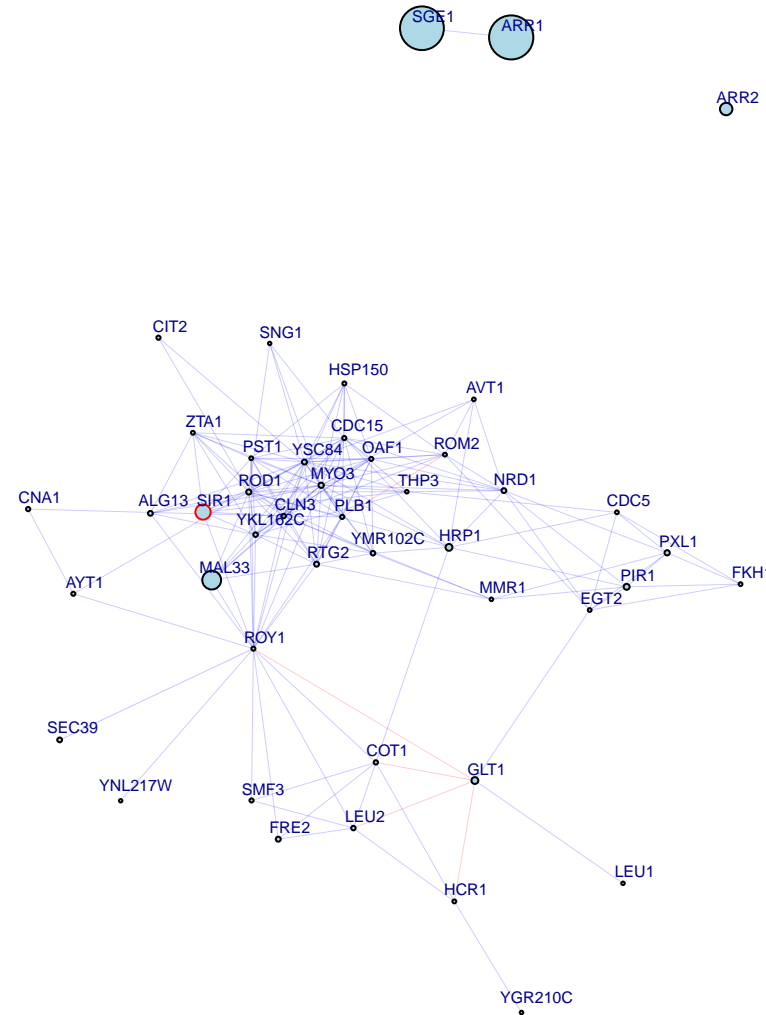

chrXI:641098\_A/G top 45 down genes

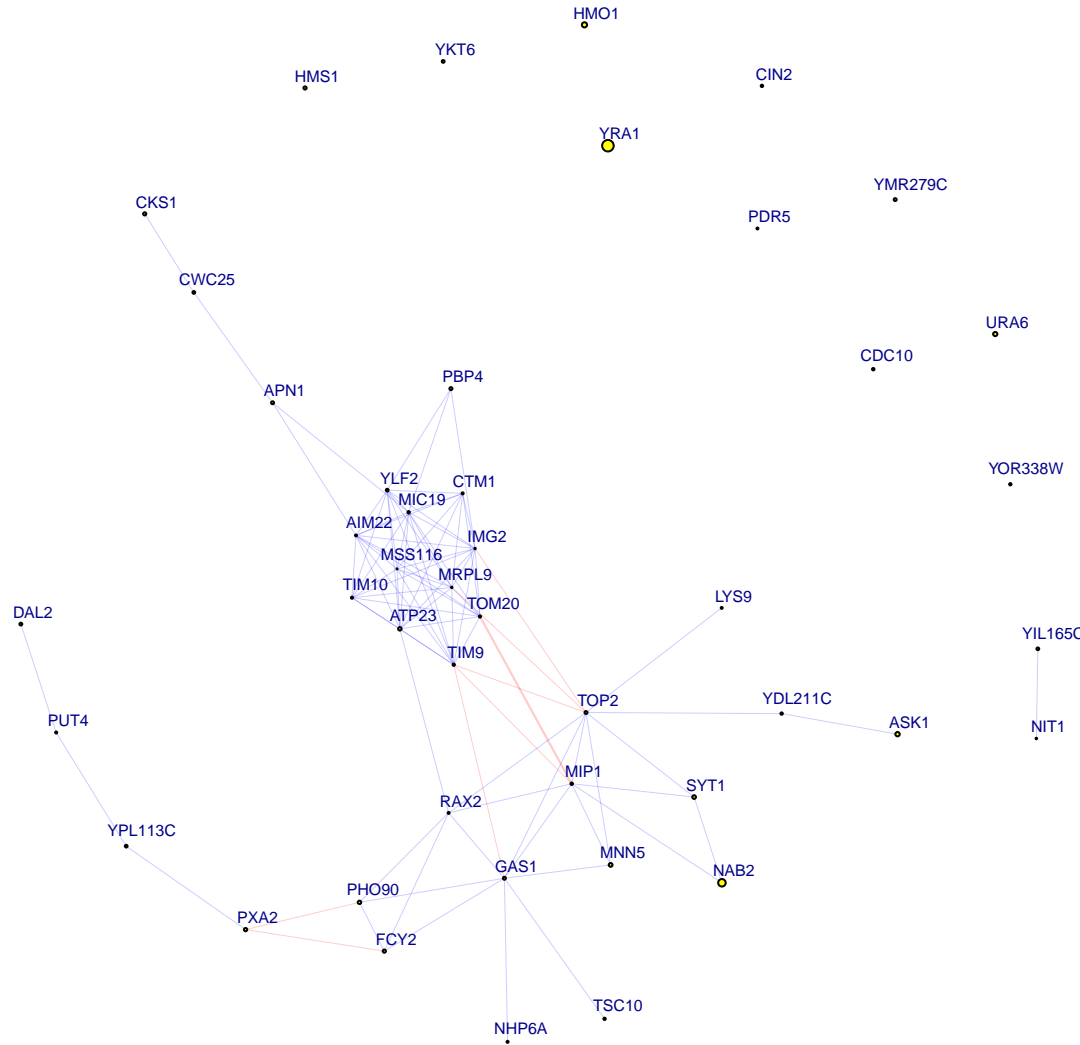

chrXI:641098\_A/G top 95 up and down genes

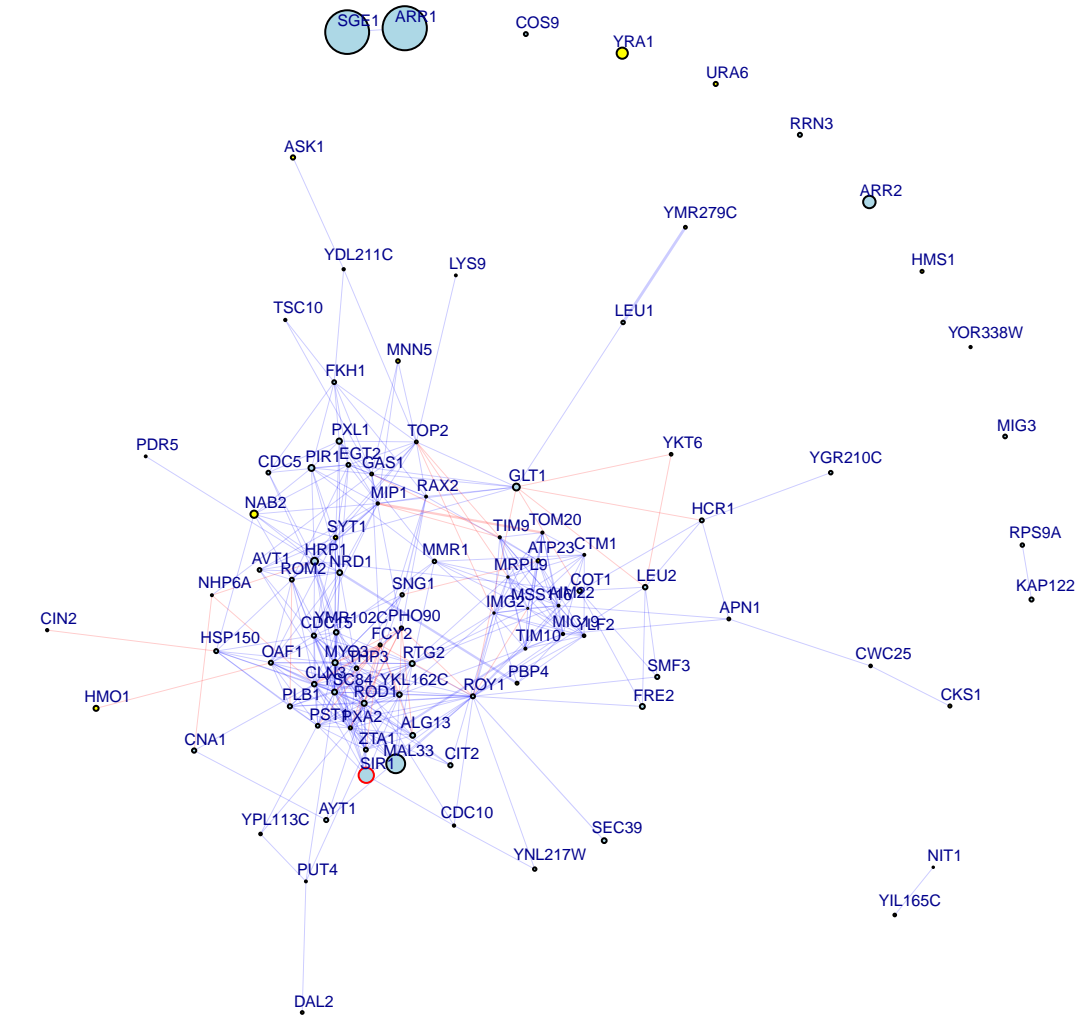



chrXII:510559\_C/T top 50 up genes

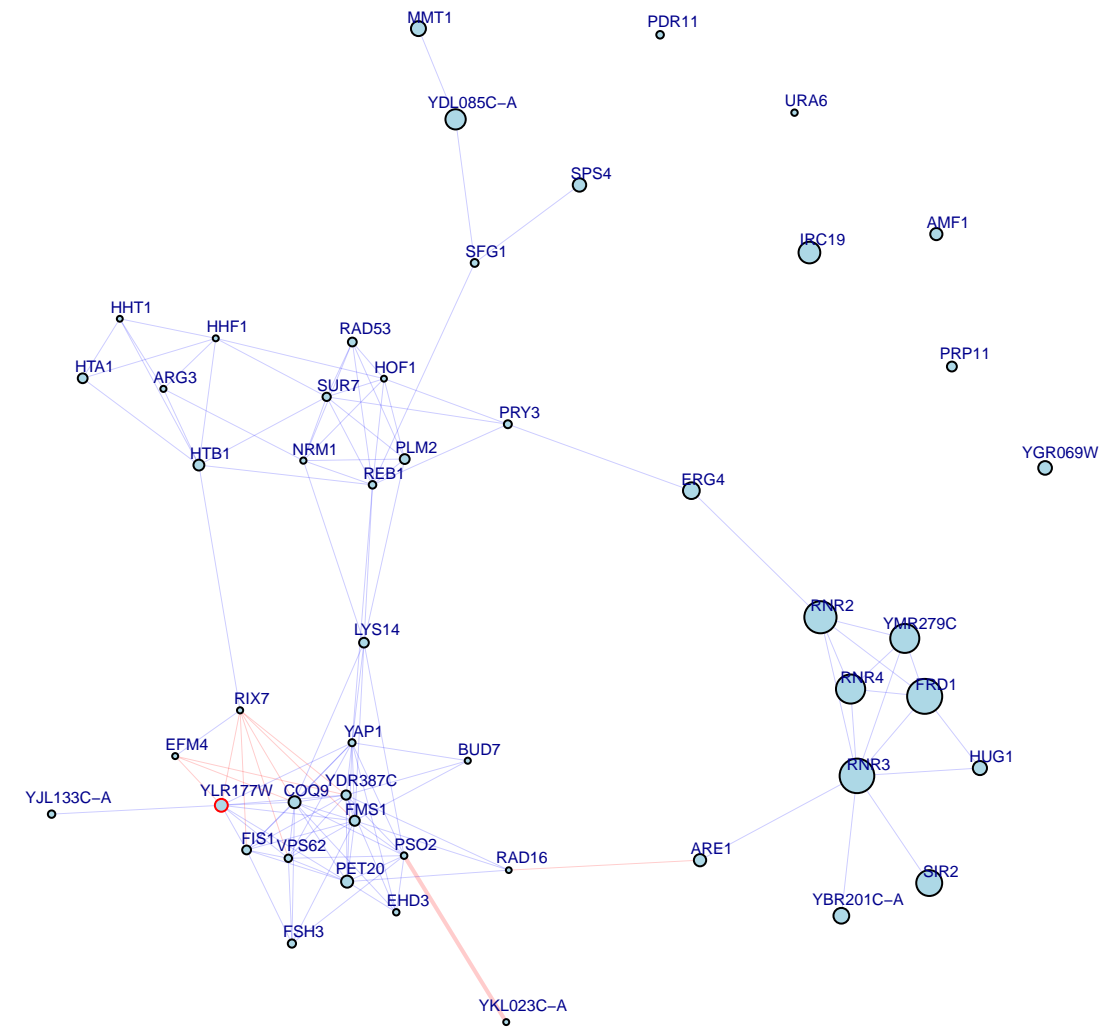

chrXII:510559\_C/T top 50 down genes

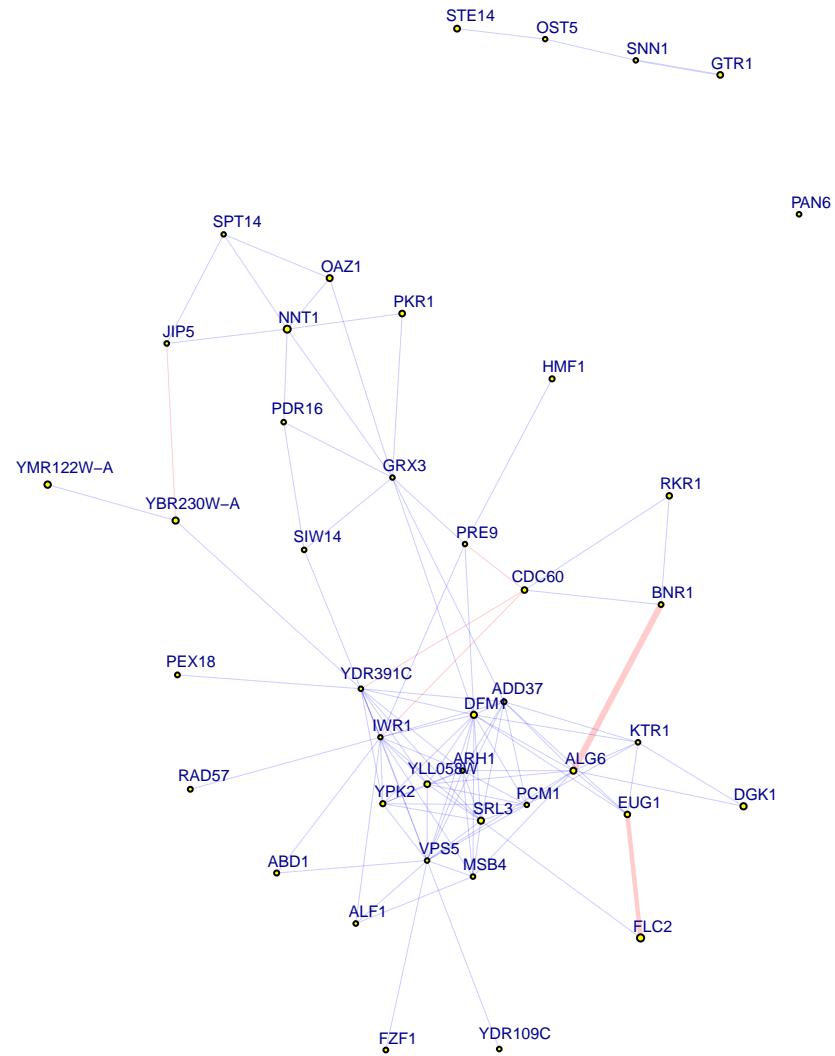

chrXII:510559\_C/T top 100 up and down genes

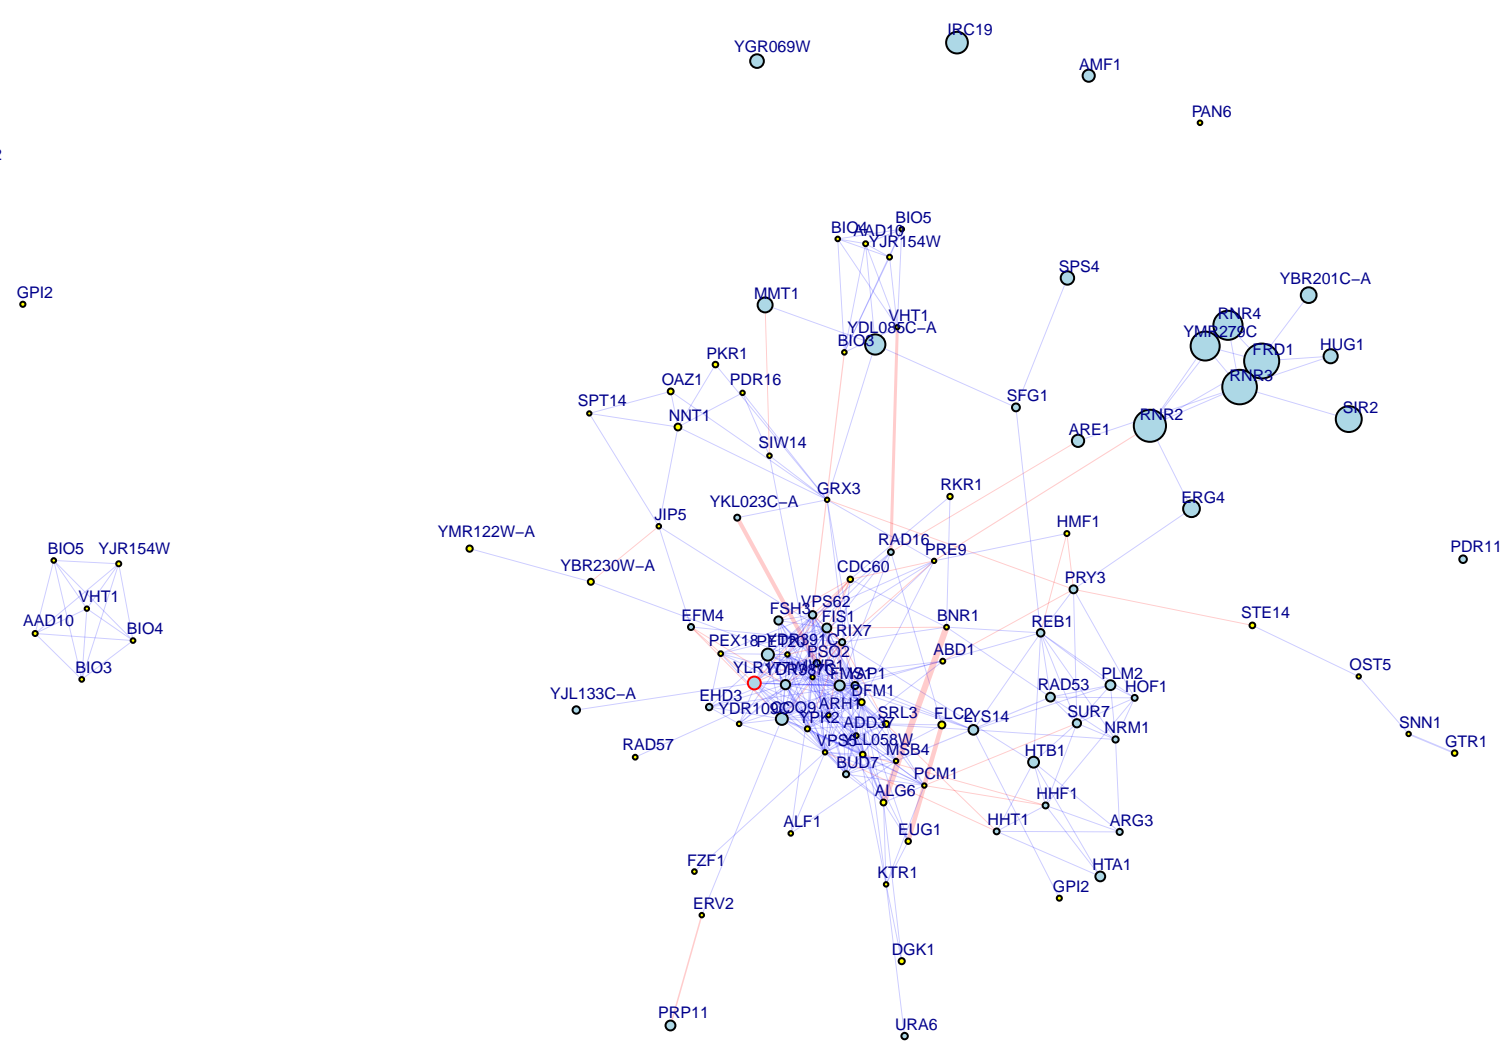

chrXII:657022\_T/C top 50 up genes

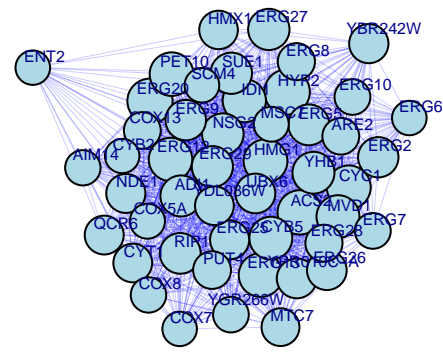

chrXII:657022\_T/C top 50 down genes

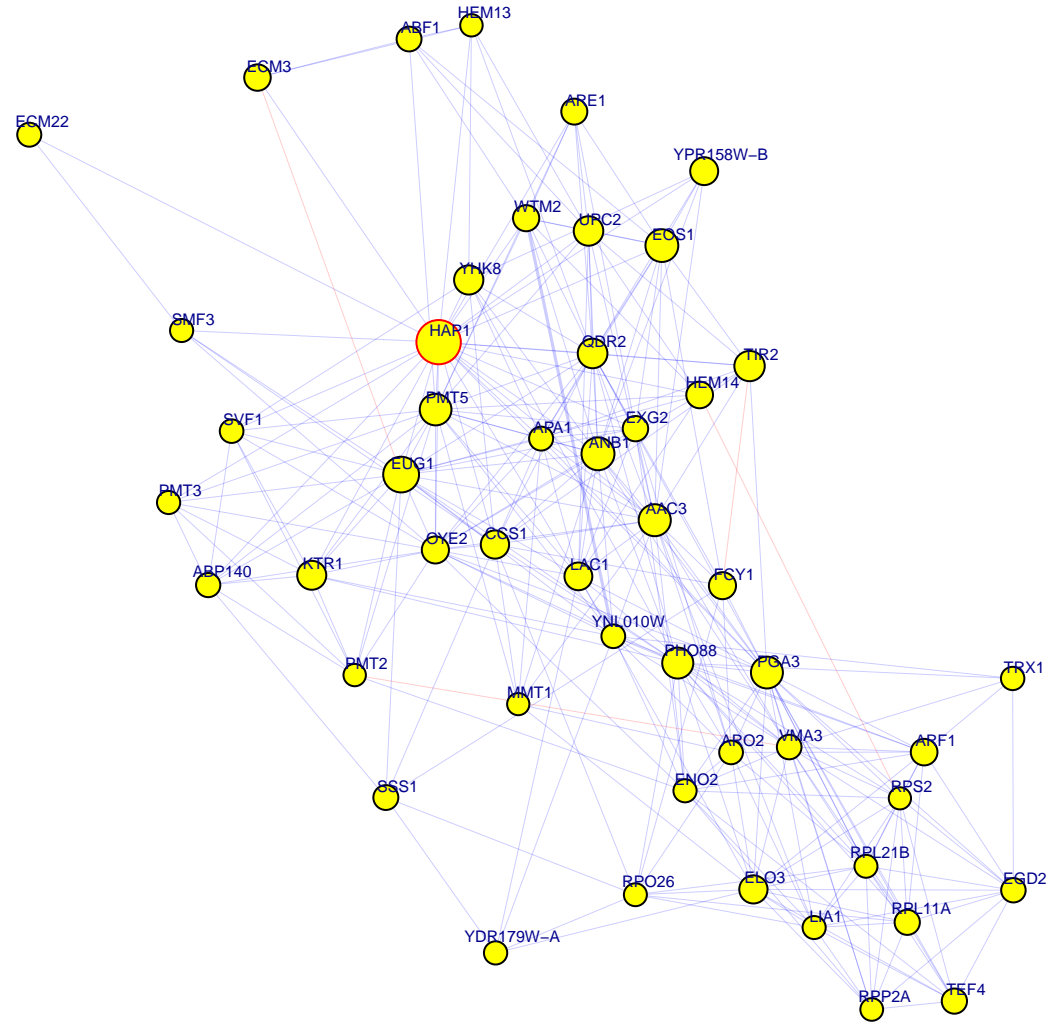

chrXII:657022\_T/C top 100 up and down genes

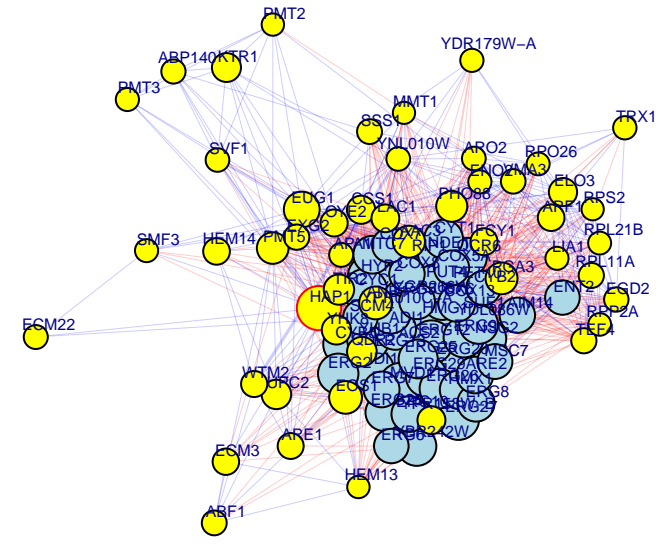

chrXII:694841\_T/C top 50 up genes

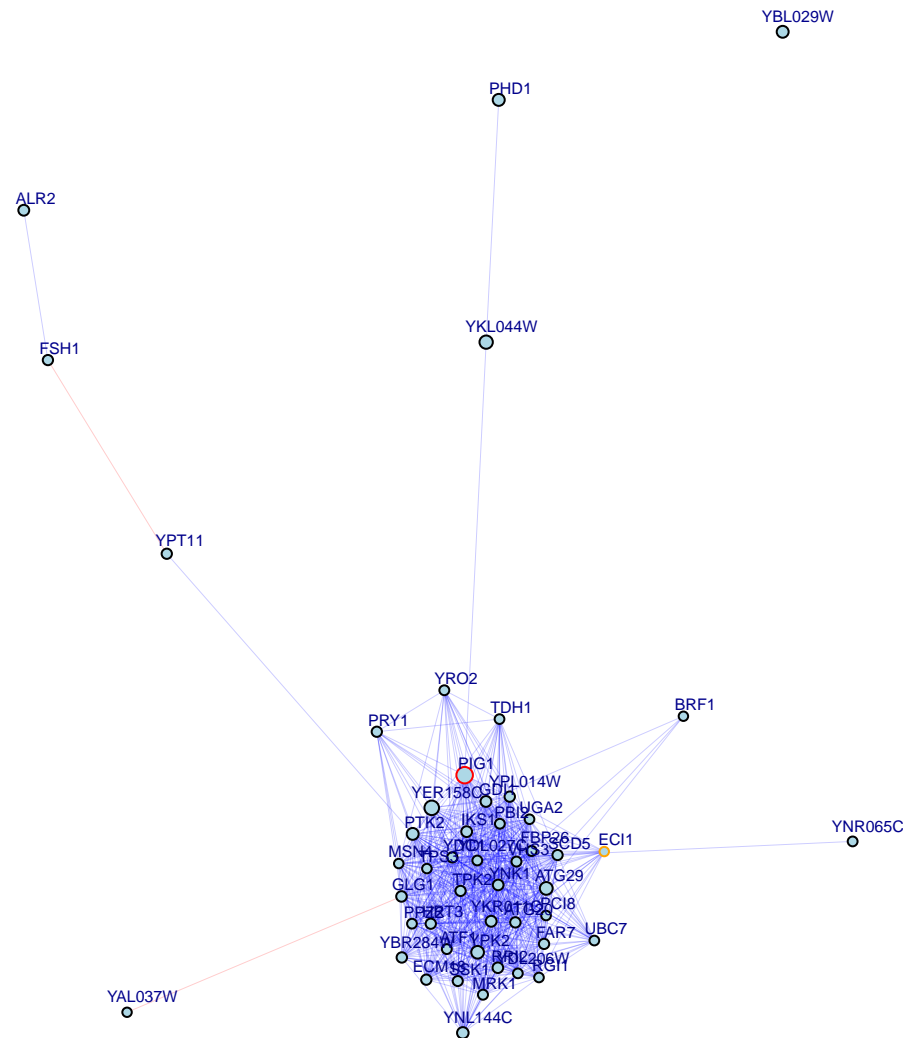

chrXII:694841\_T/C top 50 down genes

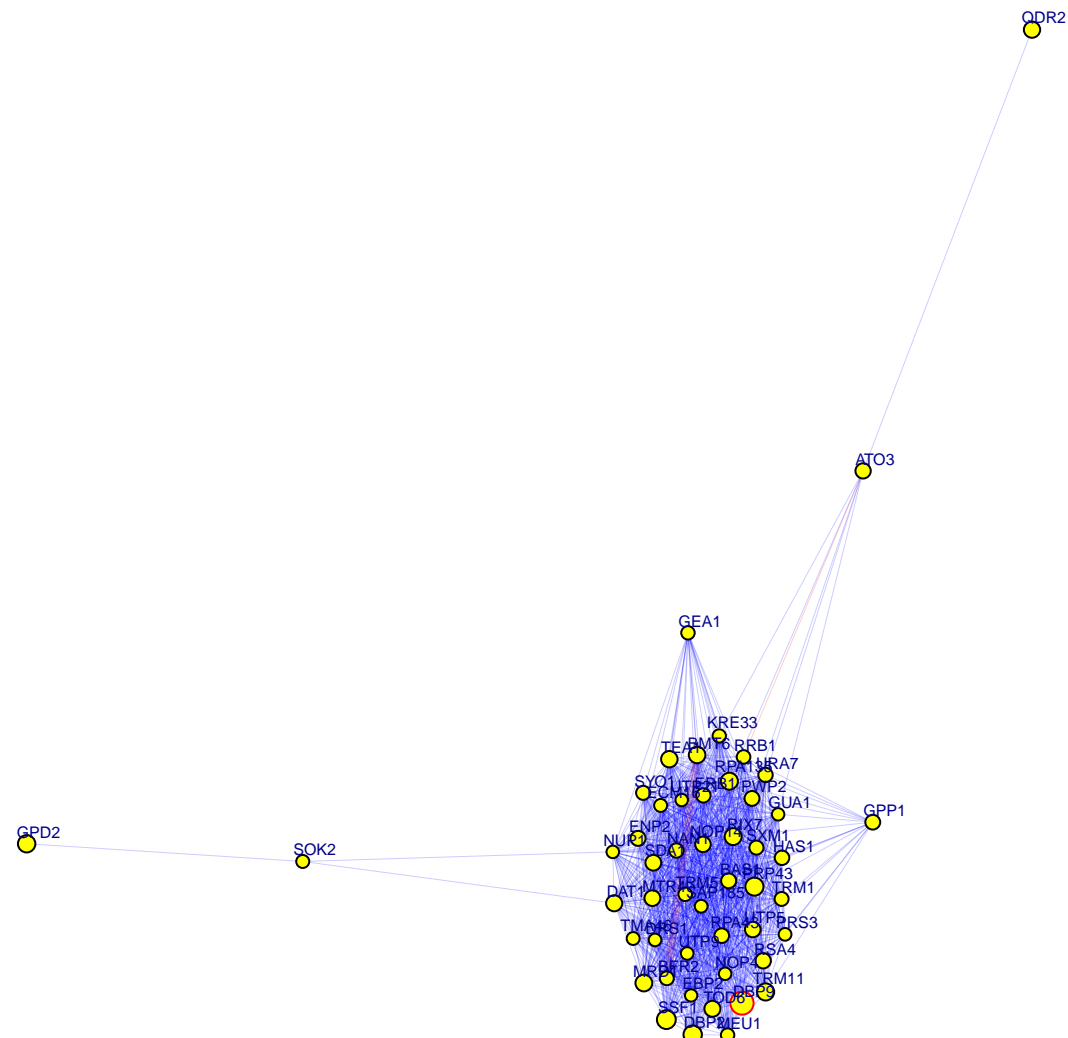

chrXII:694841\_T/C top 100 up and down genes

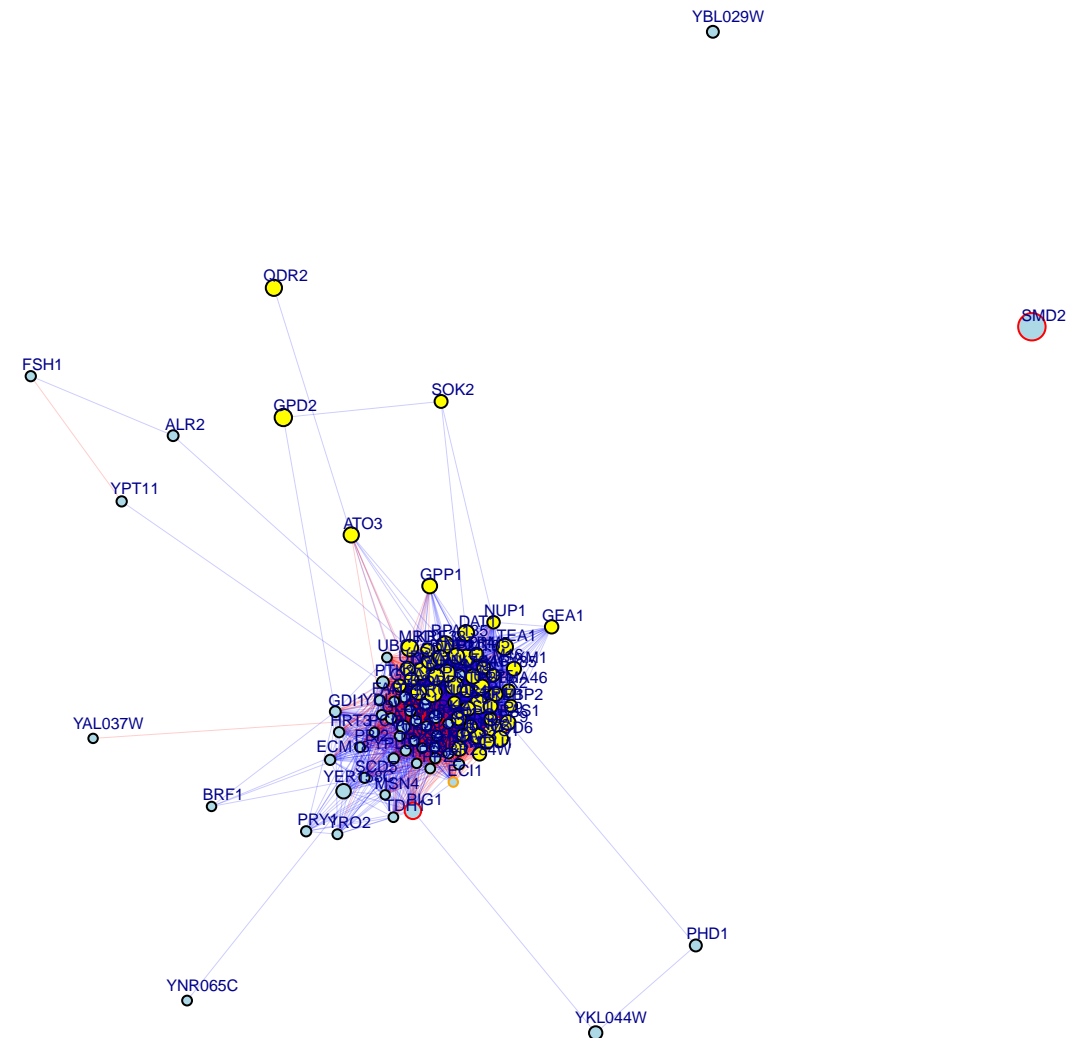

chrXII:848842\_A/G top 50 up genes

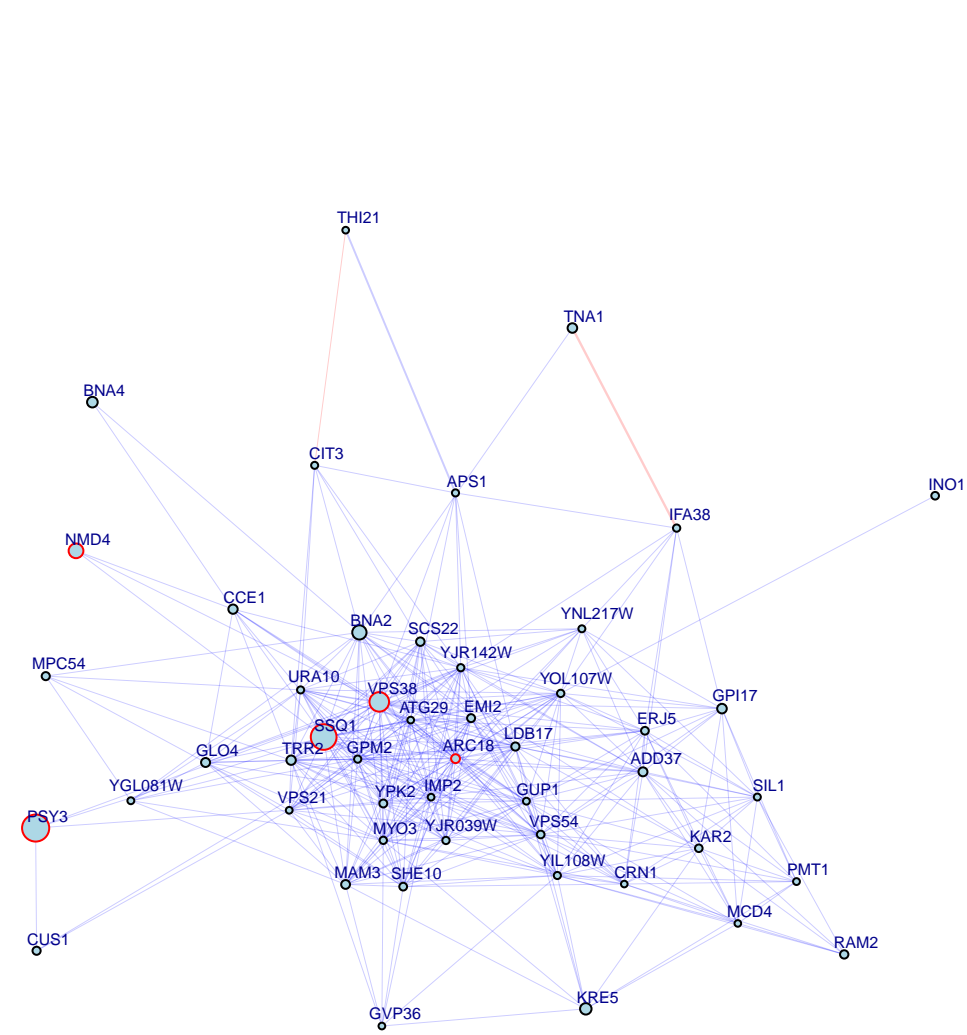

chrXII:848842\_A/G top 50 down genes

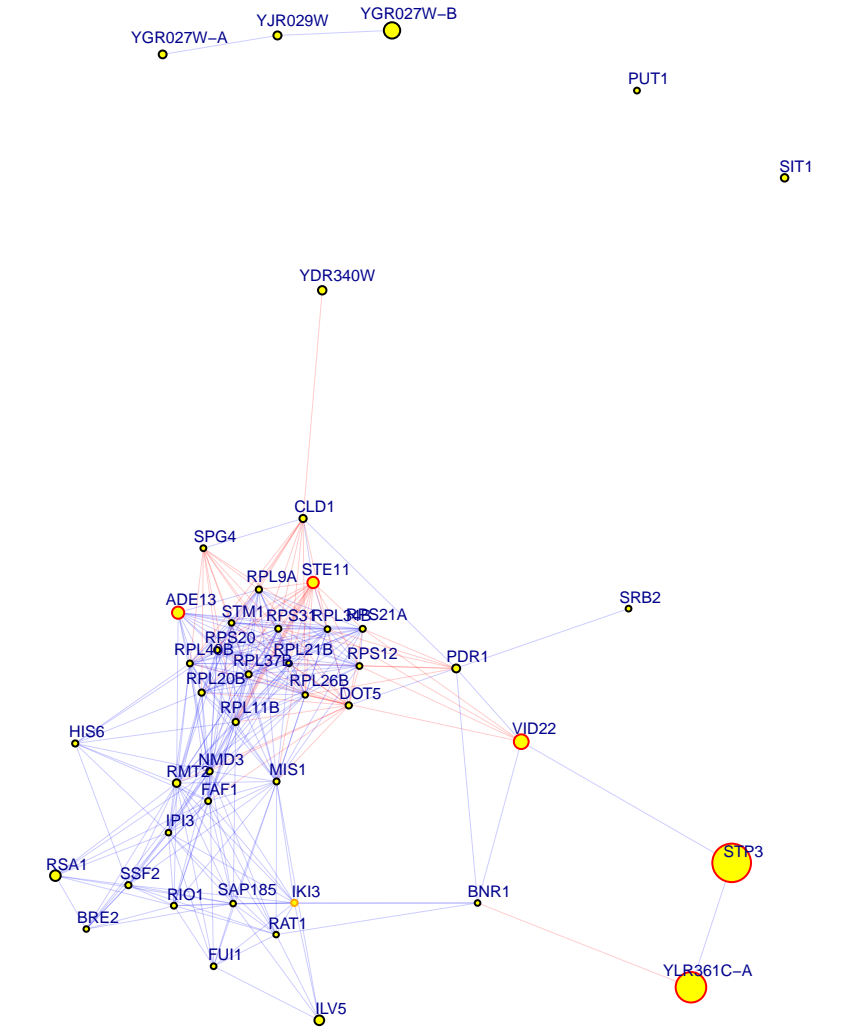

chrXII:848842\_A/G top 100 up and down genes

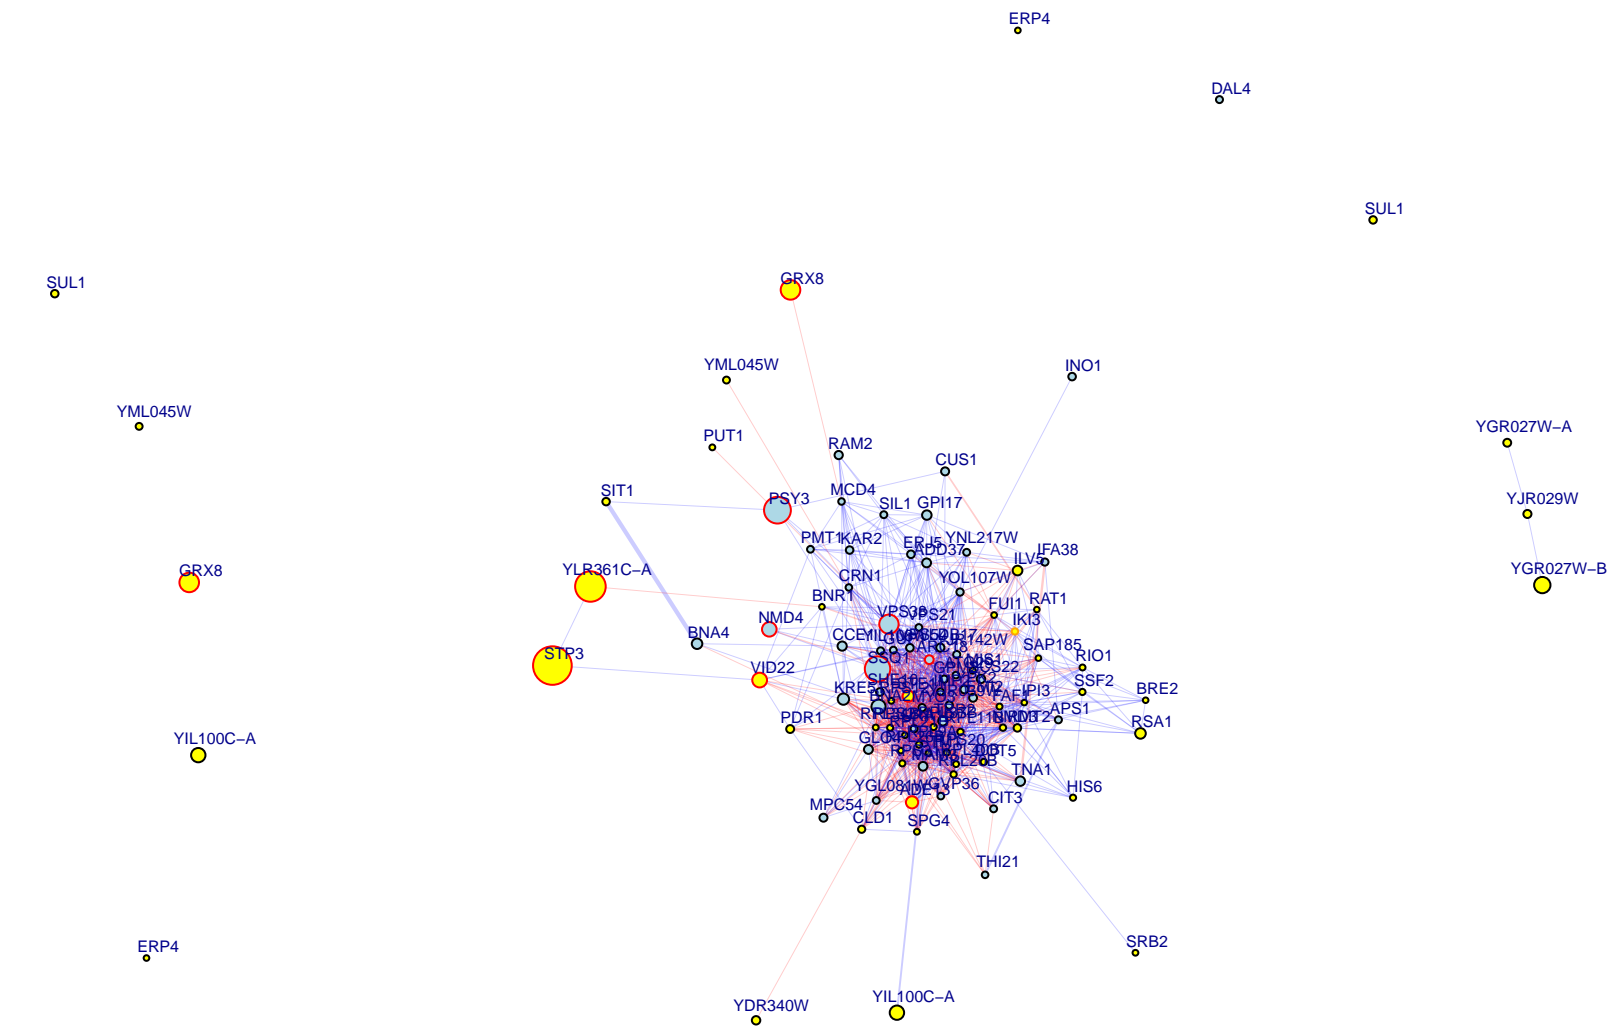

chrXII:1058607\_C/T top 50 up genes

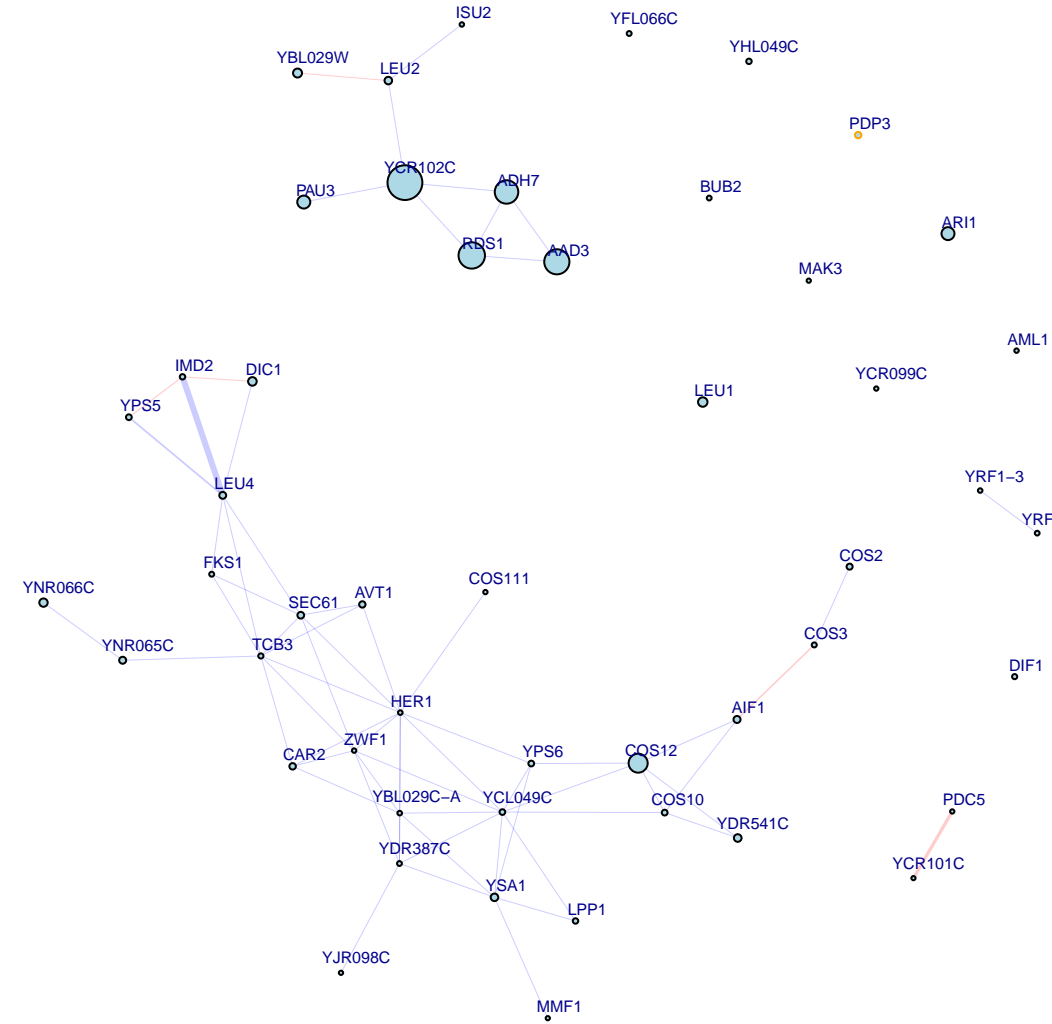

chrXII:1058607\_C/T top 50 down genes

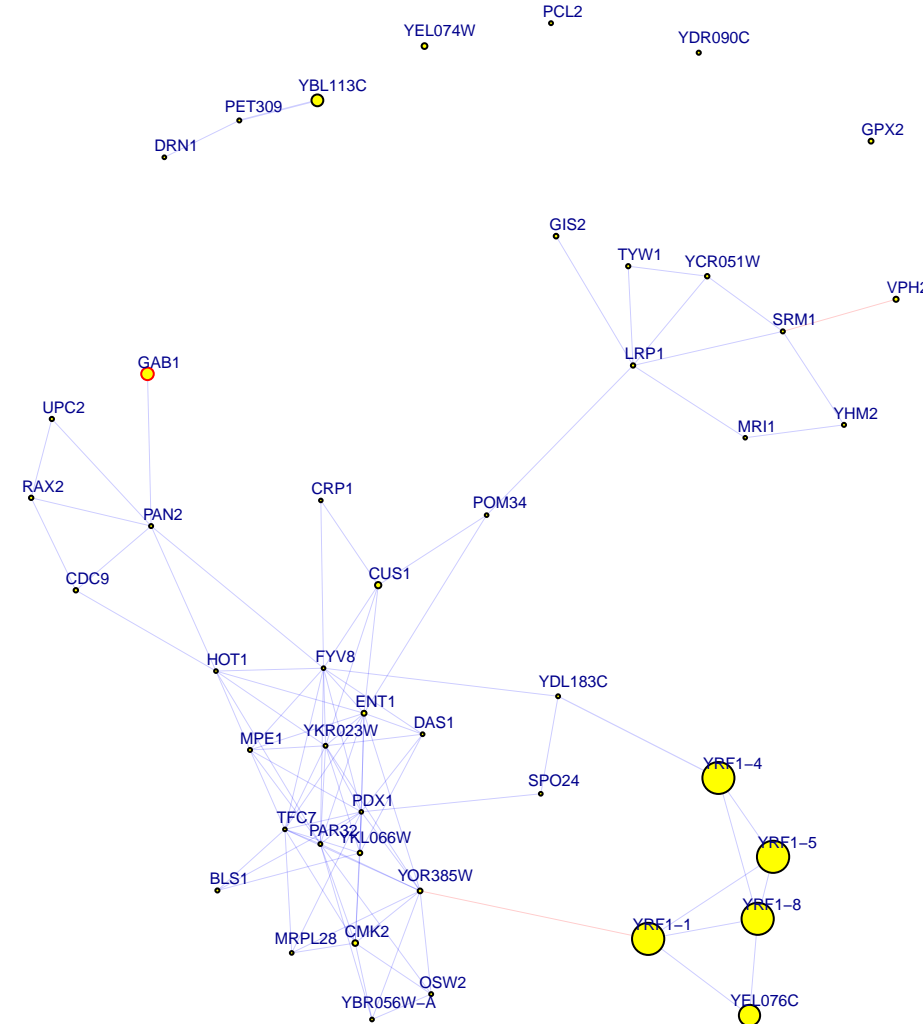

chrXII:1058607\_C/T top 100 up and down genes

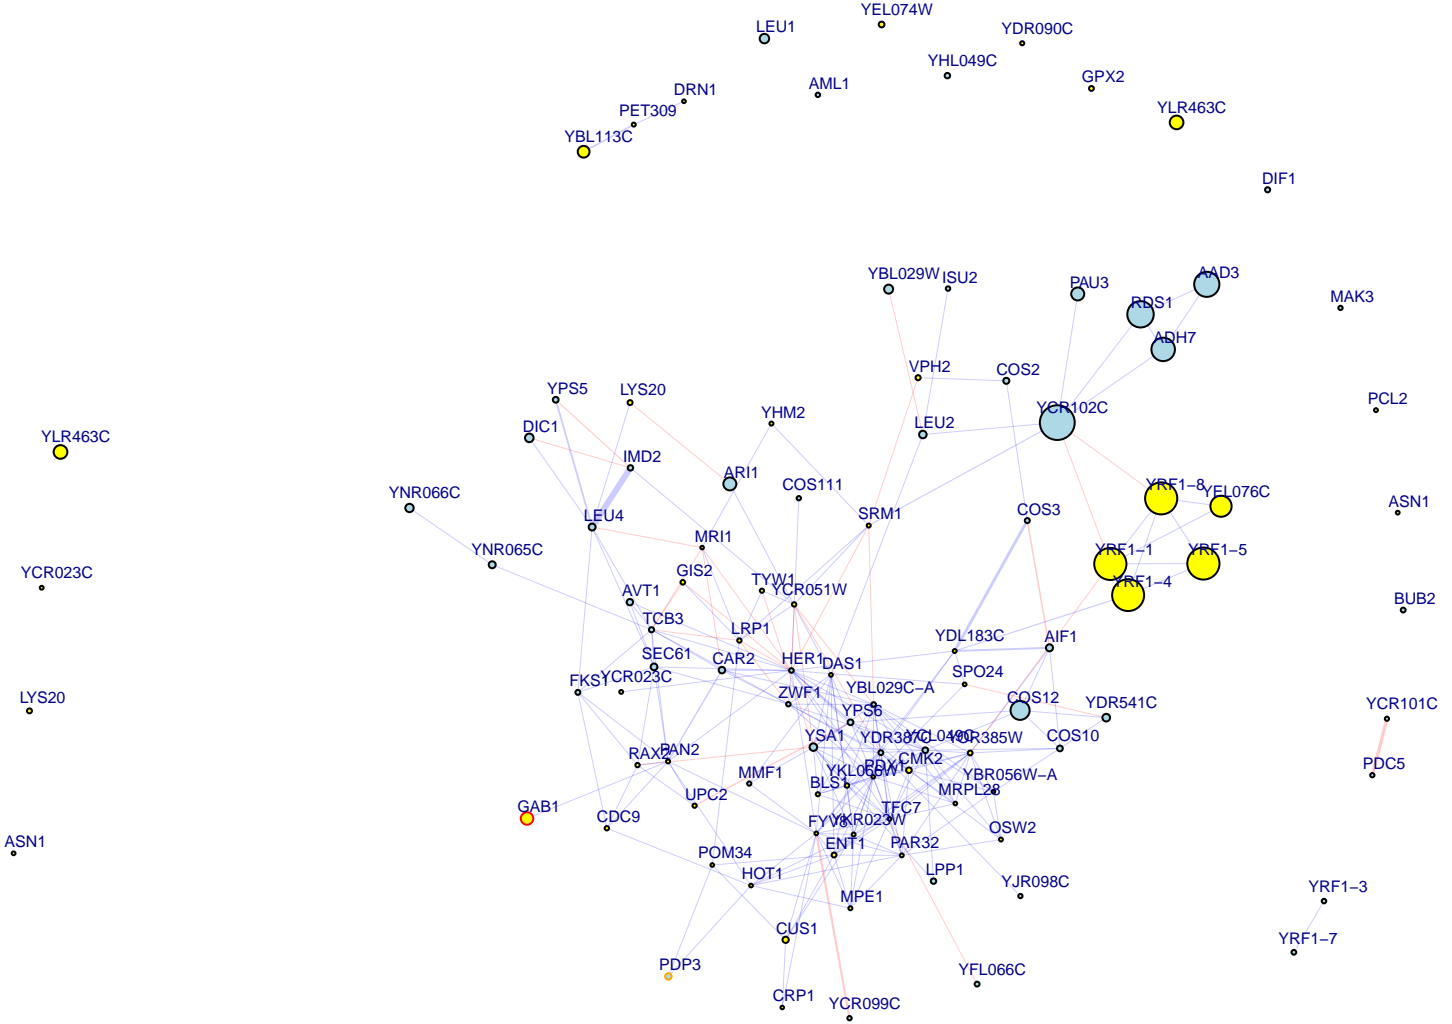



chrXIII:33836\_G/A top 50 up genes

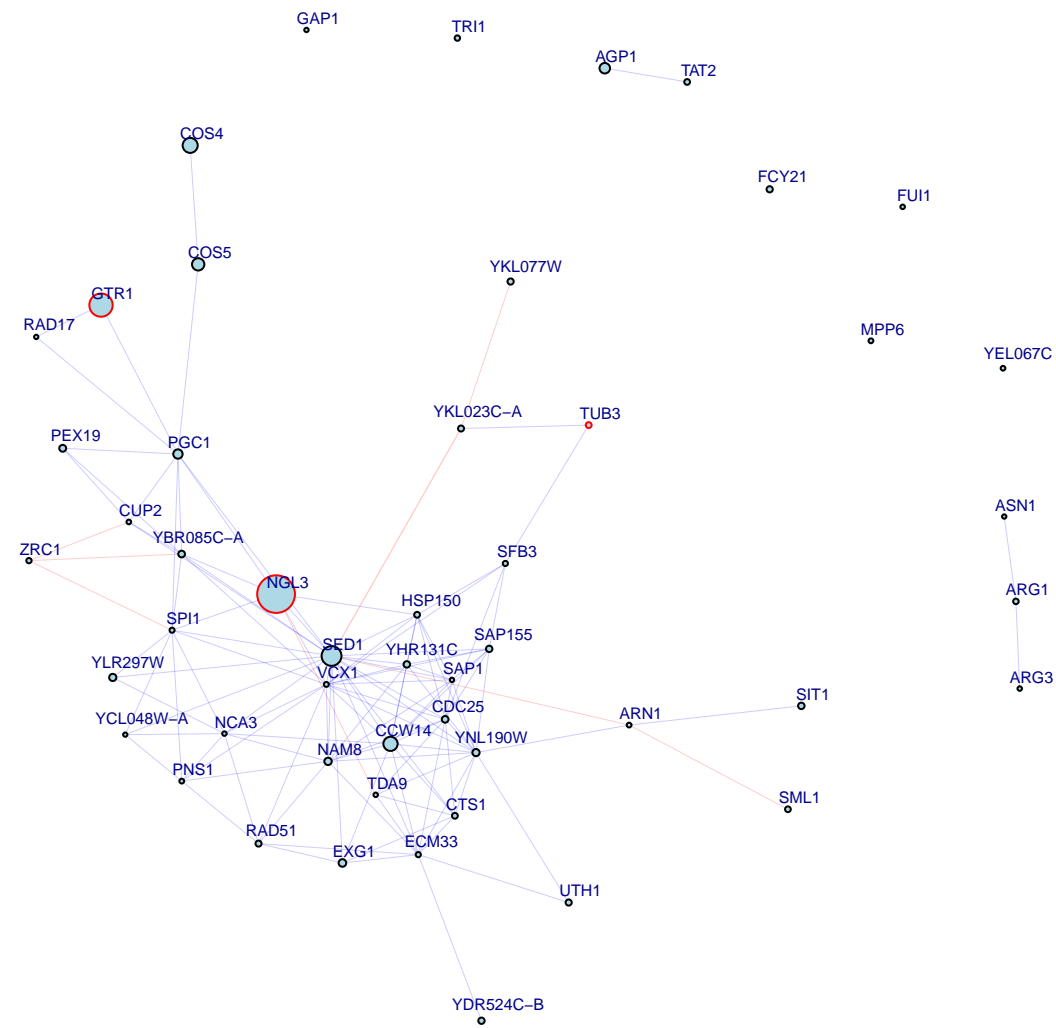

chrXIII:33836\_G/A top 50 down genes

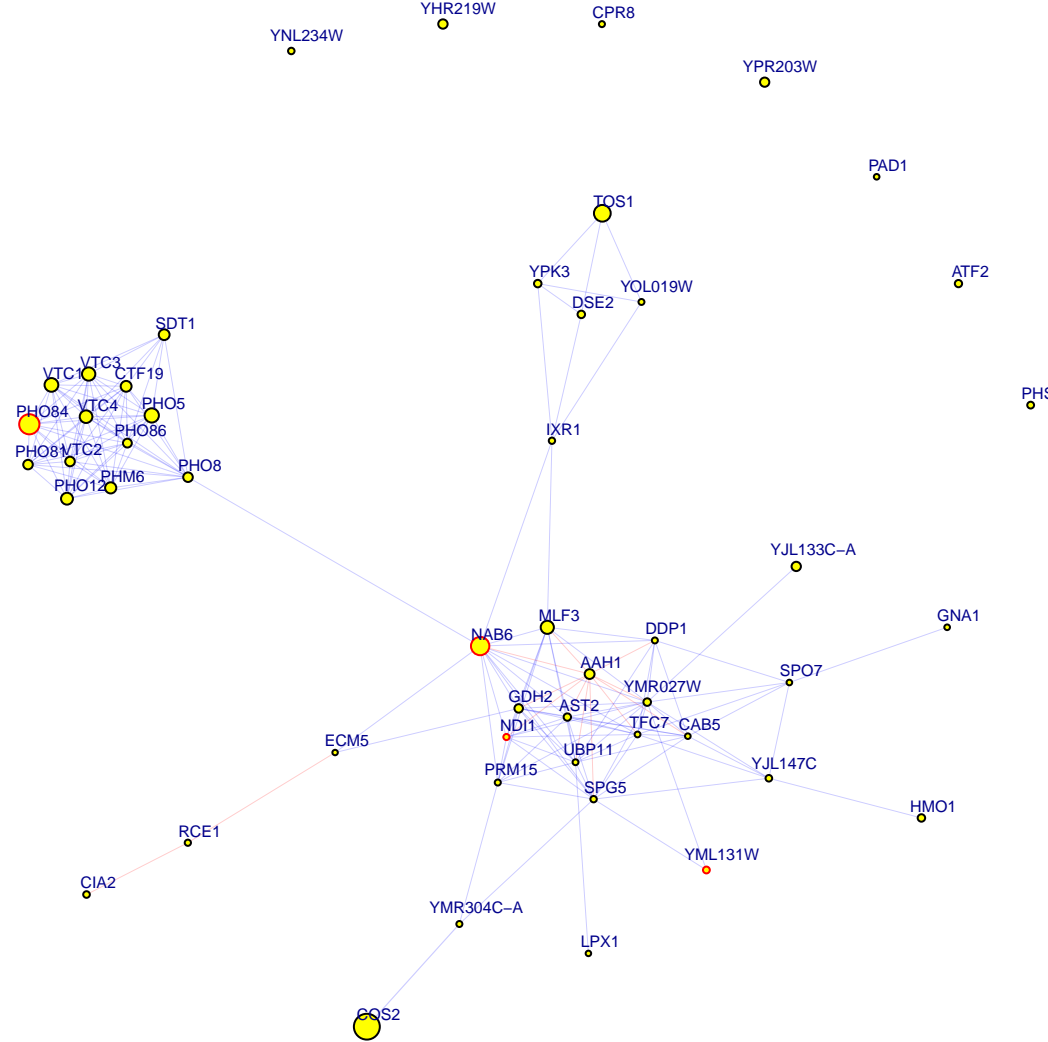

chrXIII:33836\_G/A top 100 up and down genes

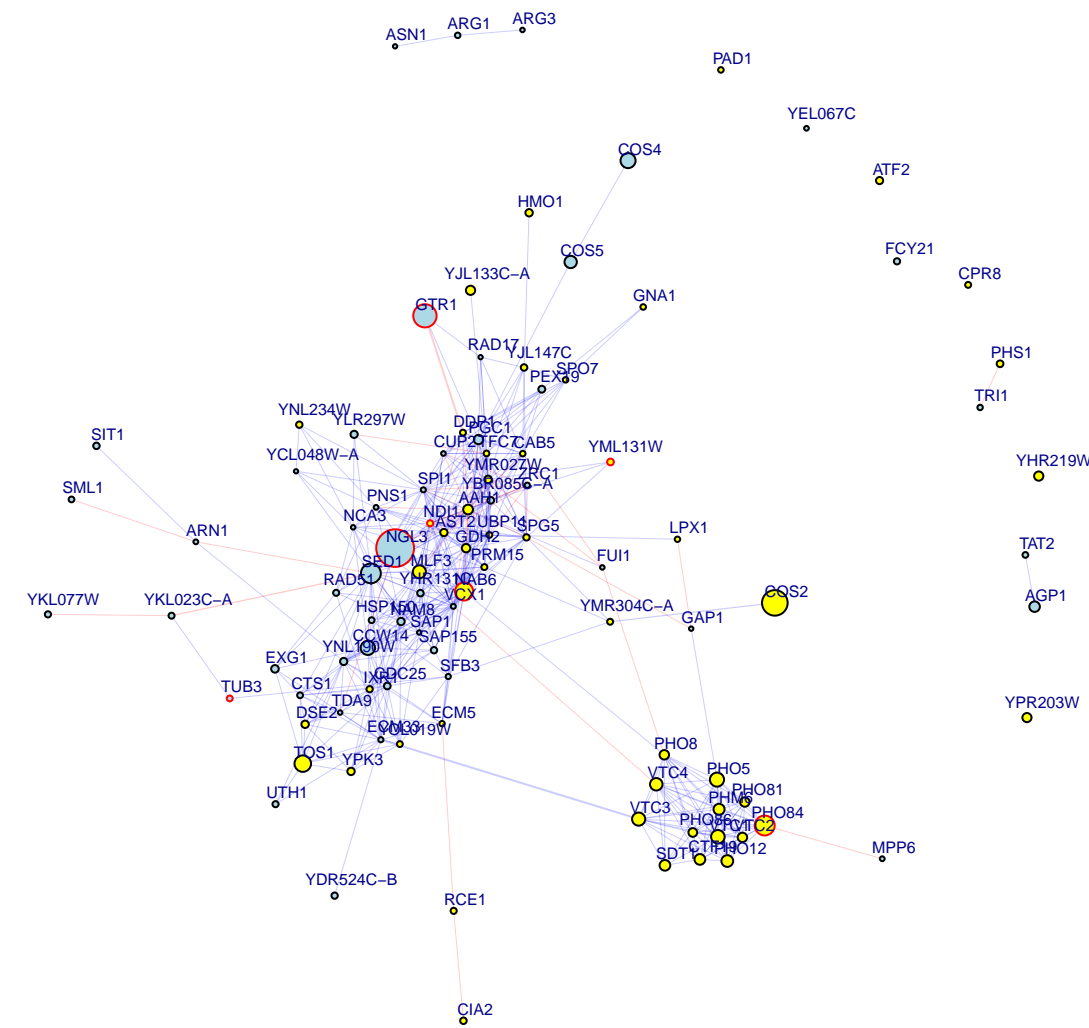





chrXIII:333449\_G/A top 50 up genes

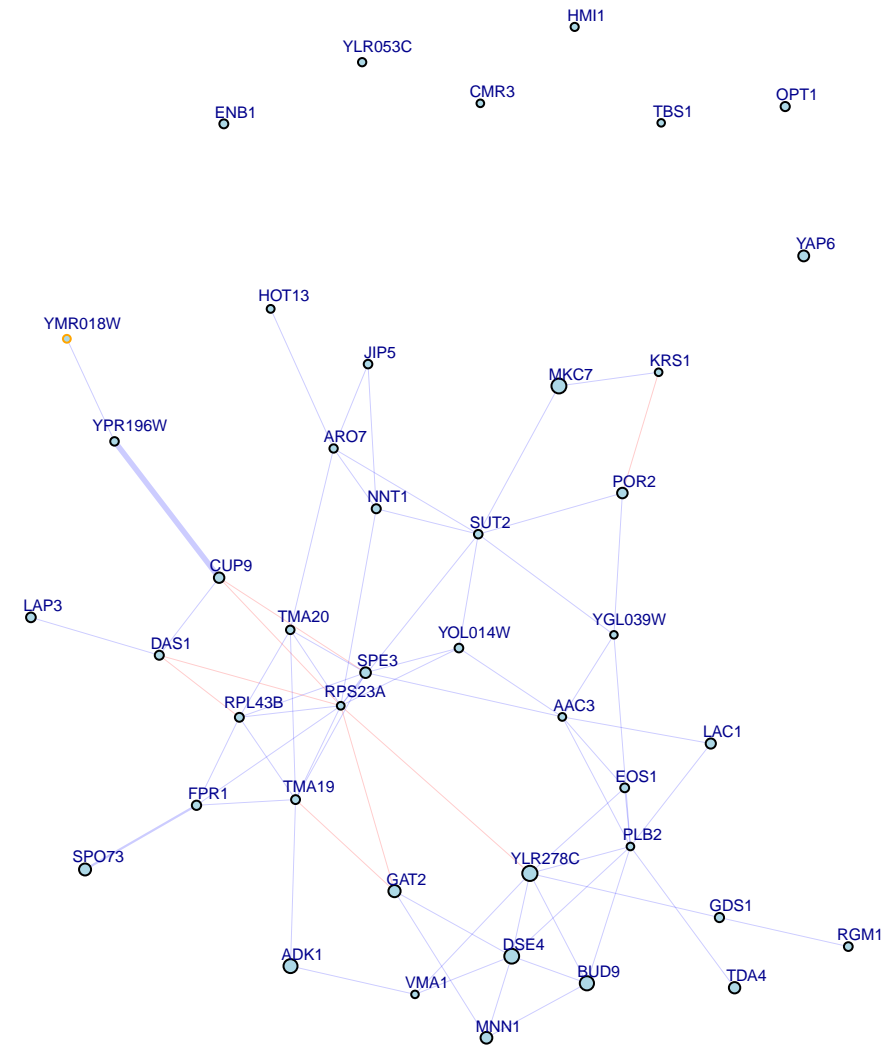

chrXIII:333449\_G/A top 50 down genes

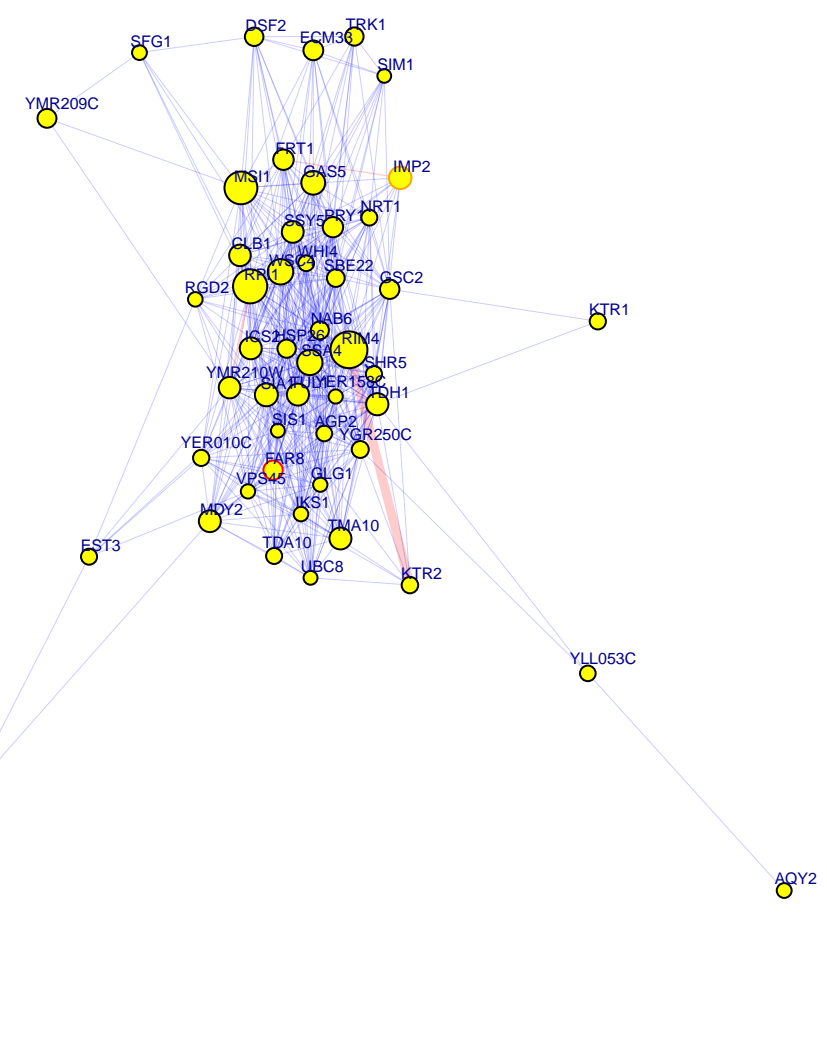

chrXIII:333449\_G/A top 100 up and down genes

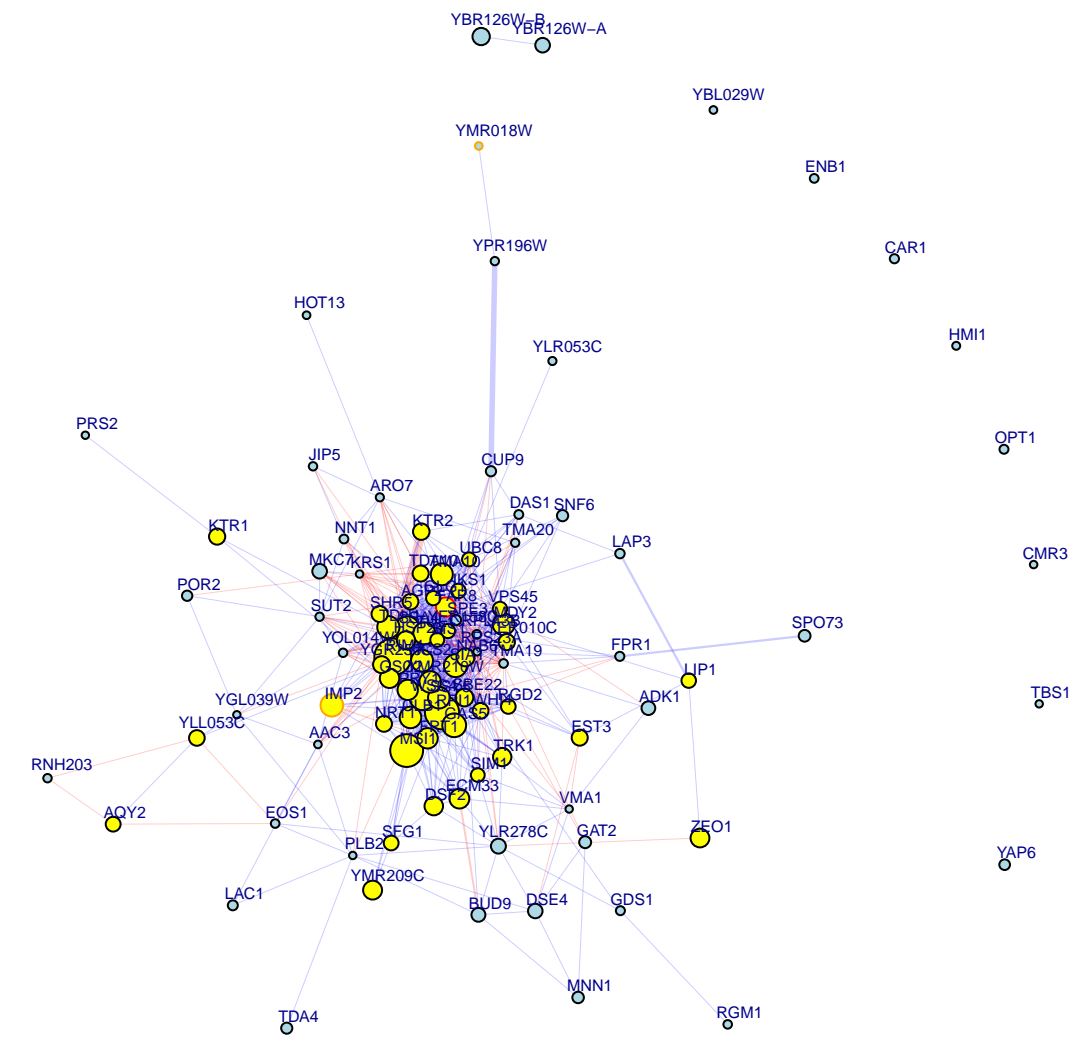

chrXIII:409778\_G/T top 50 up genes

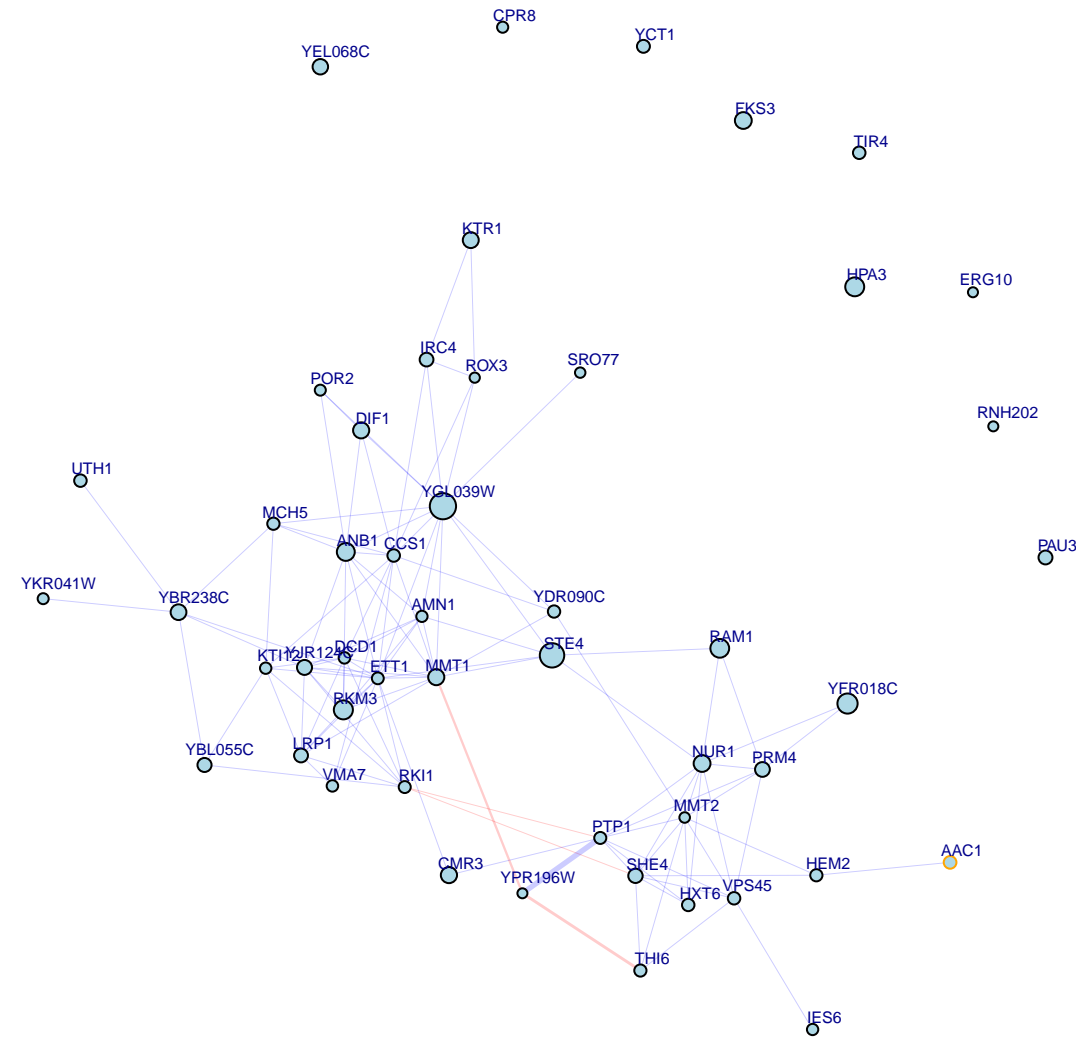

chrXIII:409778\_G/T top 50 down genes

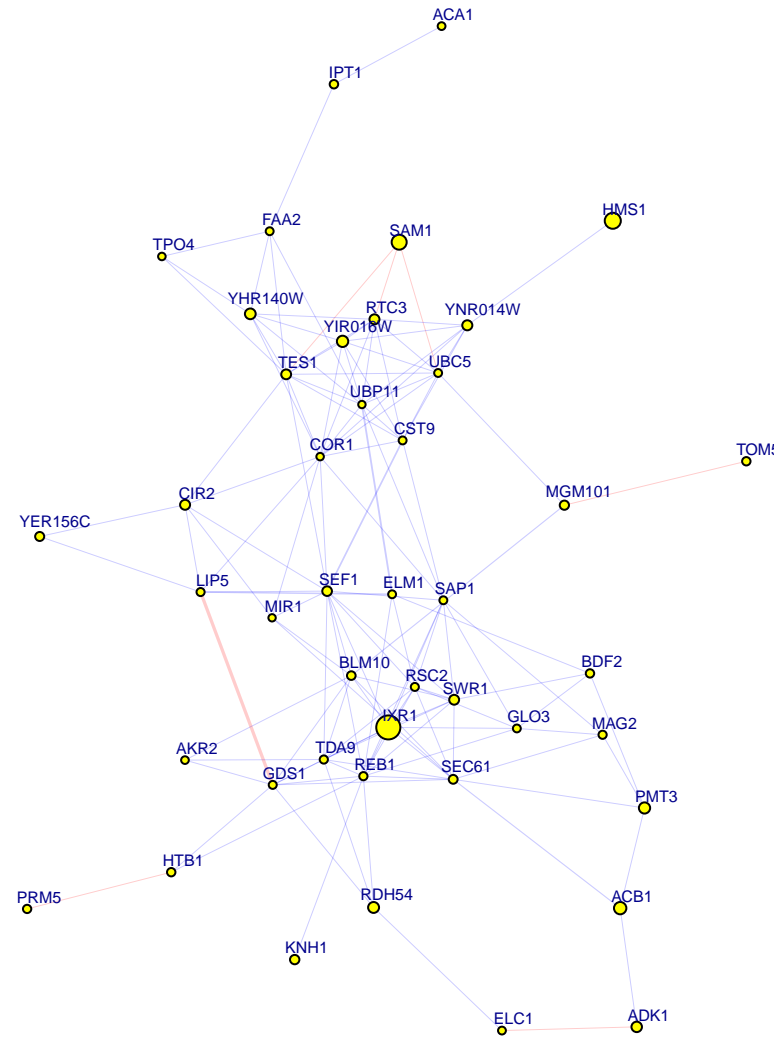

chrXIII:409778\_G/T top 100 up and down genes

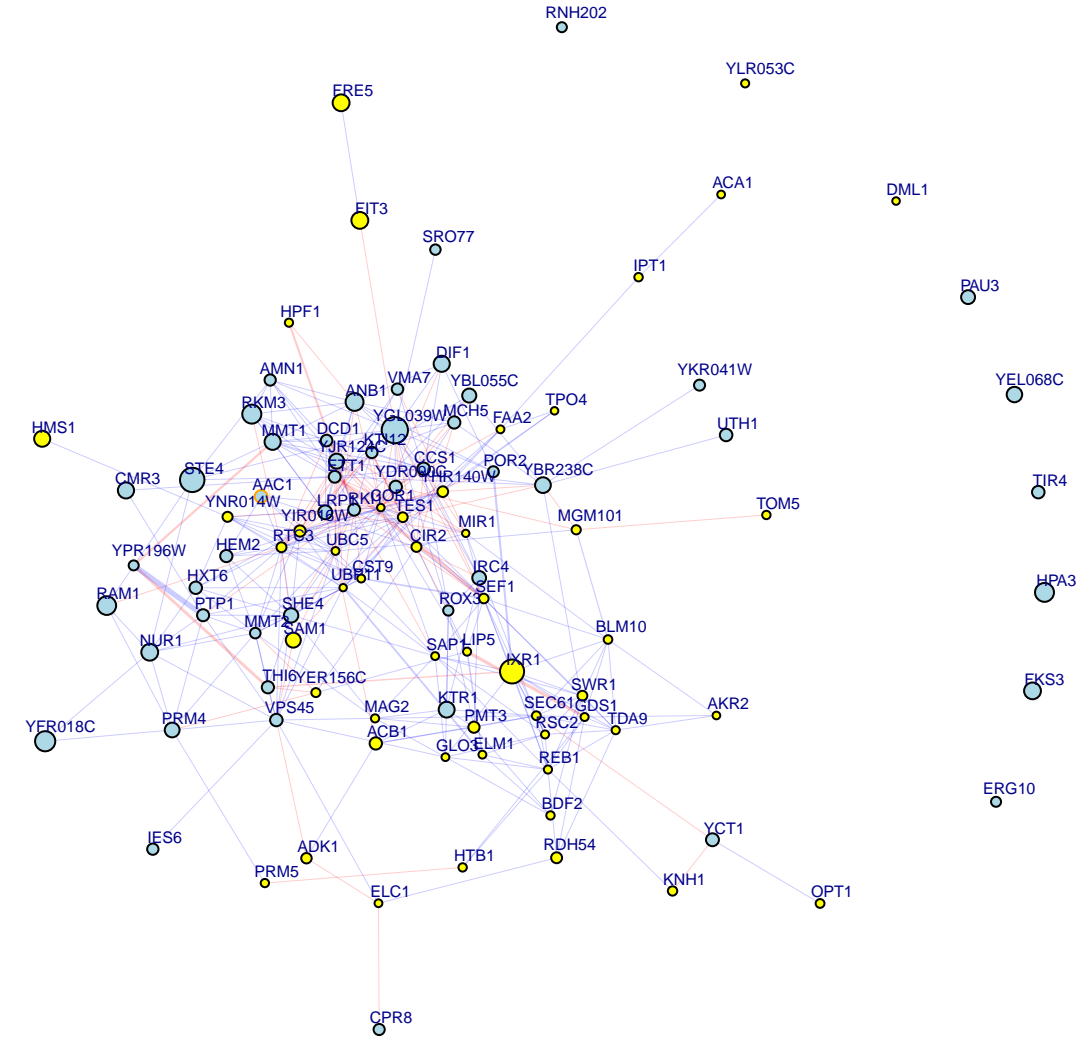



chrXIII:761318\_T/A top 50 up genes

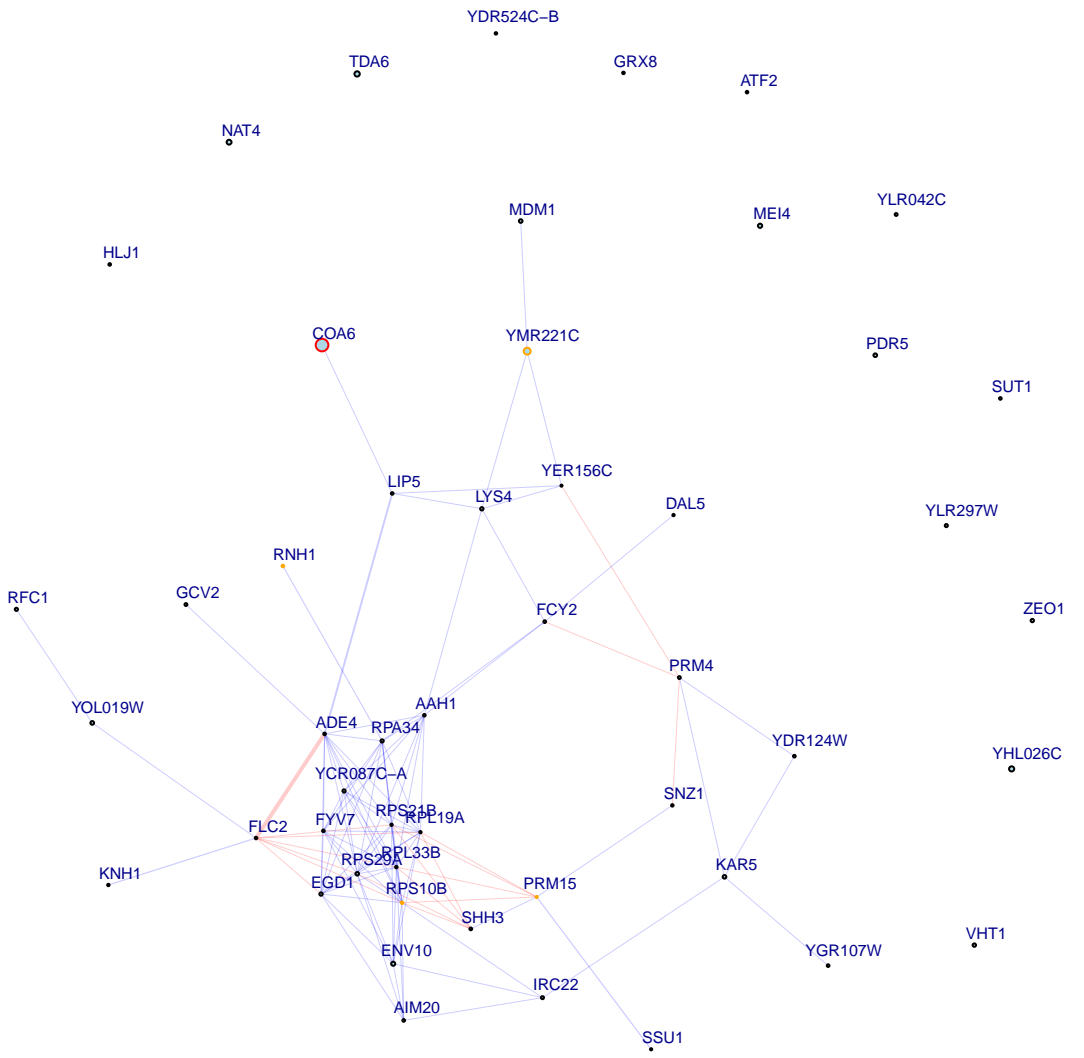

chrXIII:761318\_T/A top 50 down genes

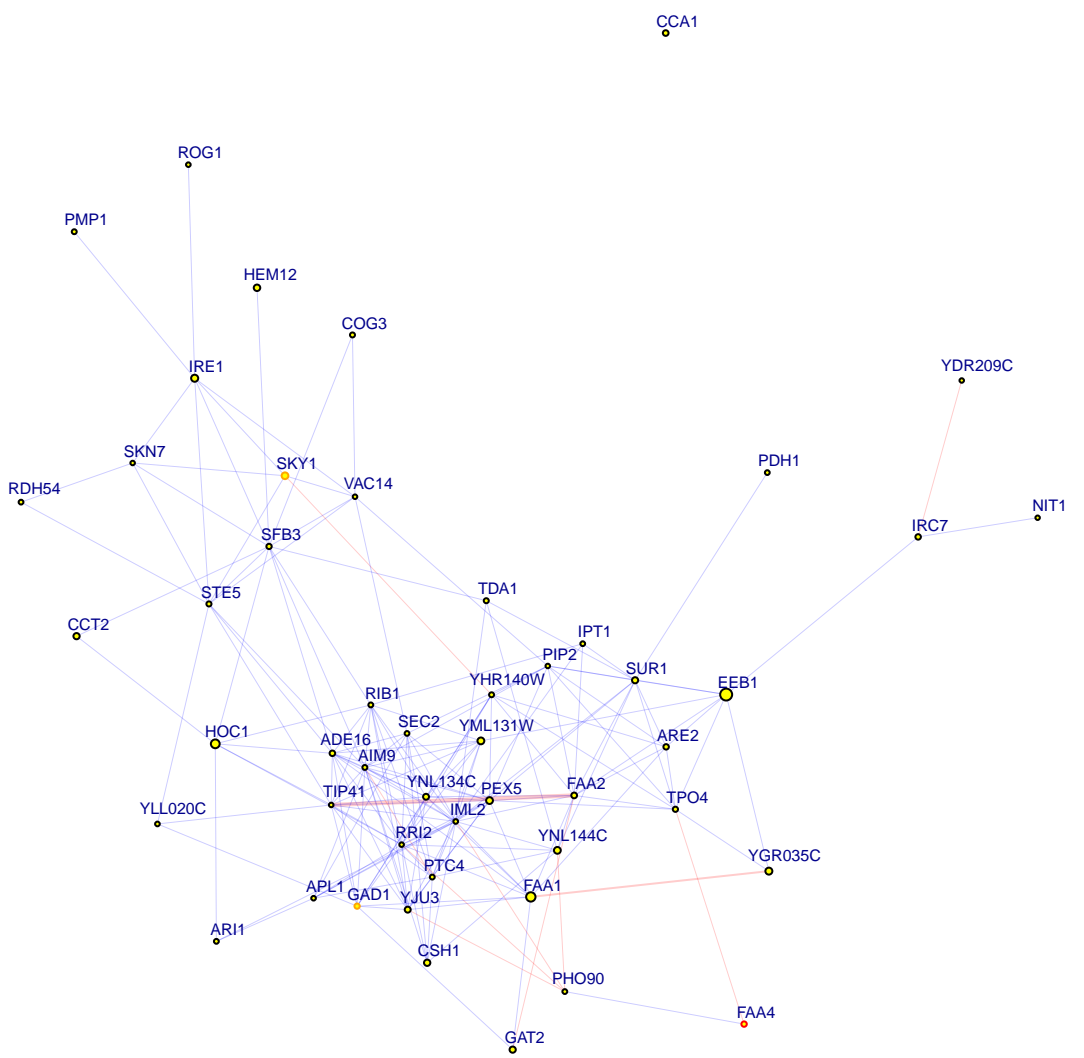

chrXIII:761318\_T/A top 100 up and down genes

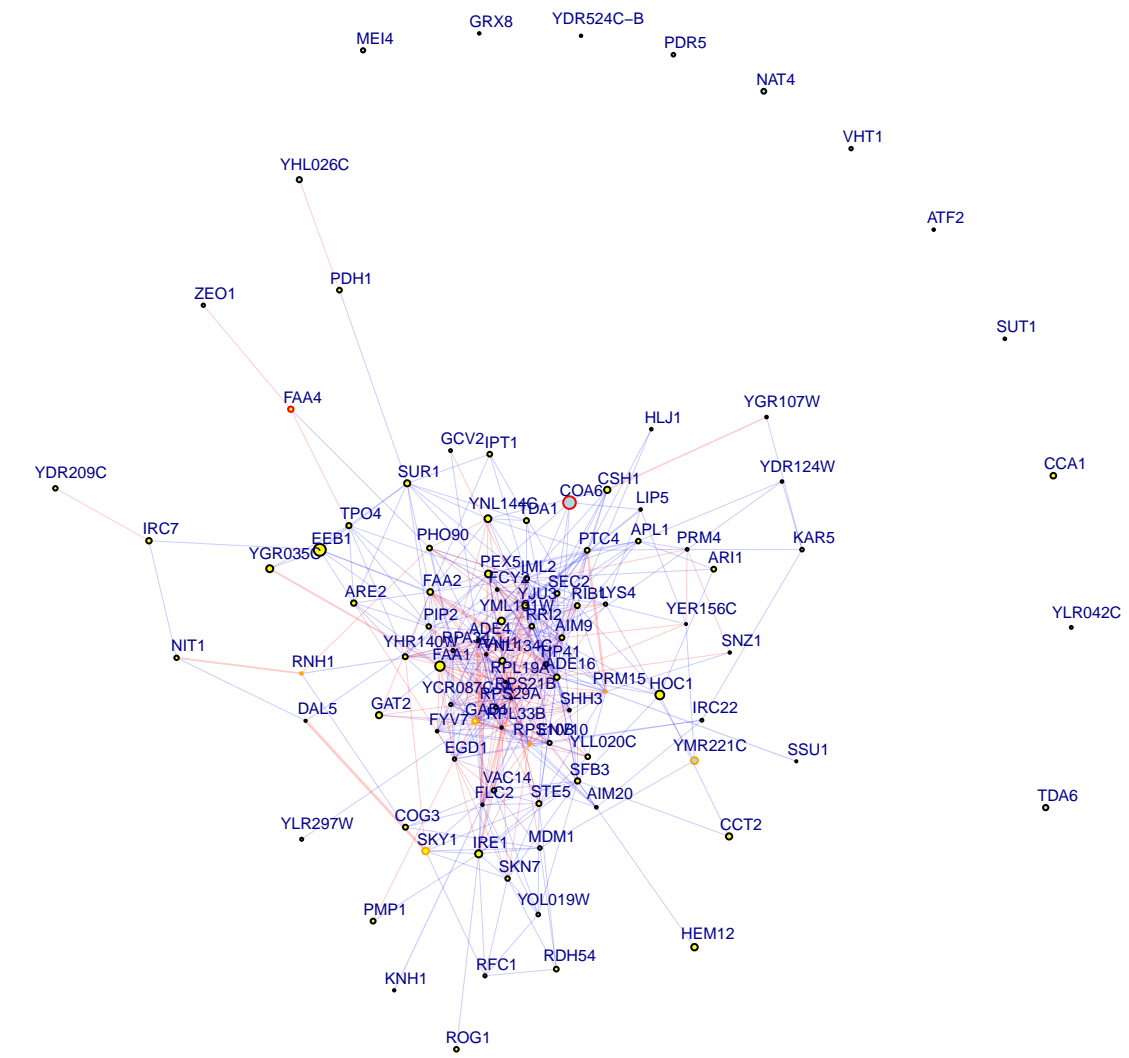







chrXIV:267161\_G/A top 50 up genes

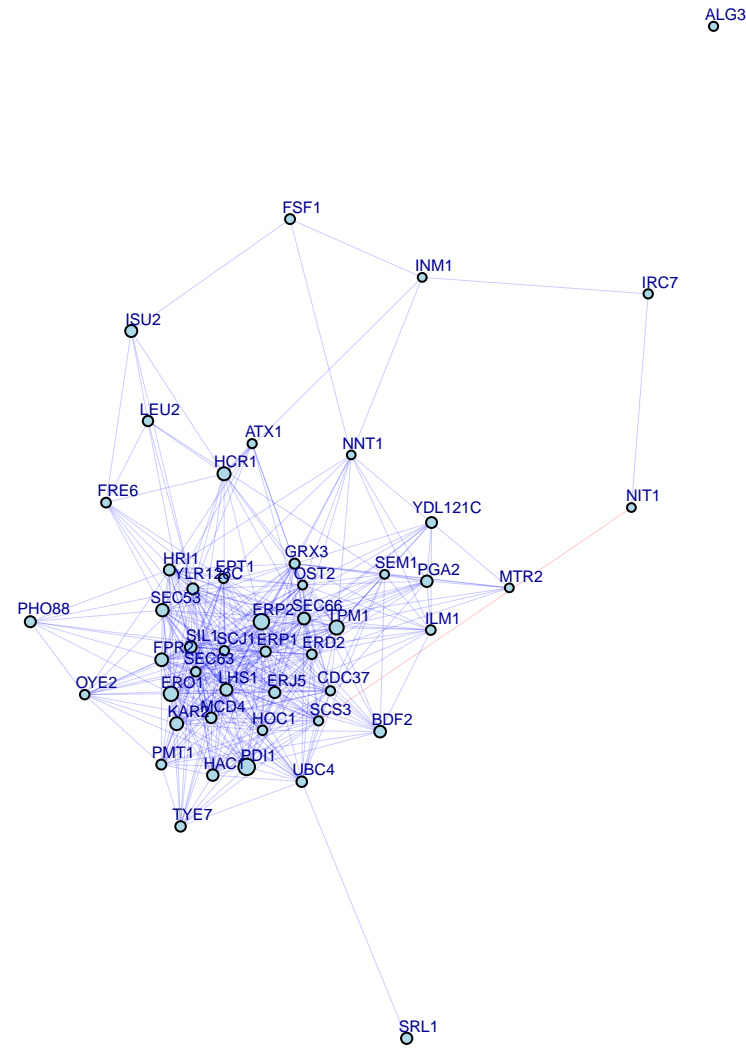

chrXIV:267161\_G/A top 50 down genes

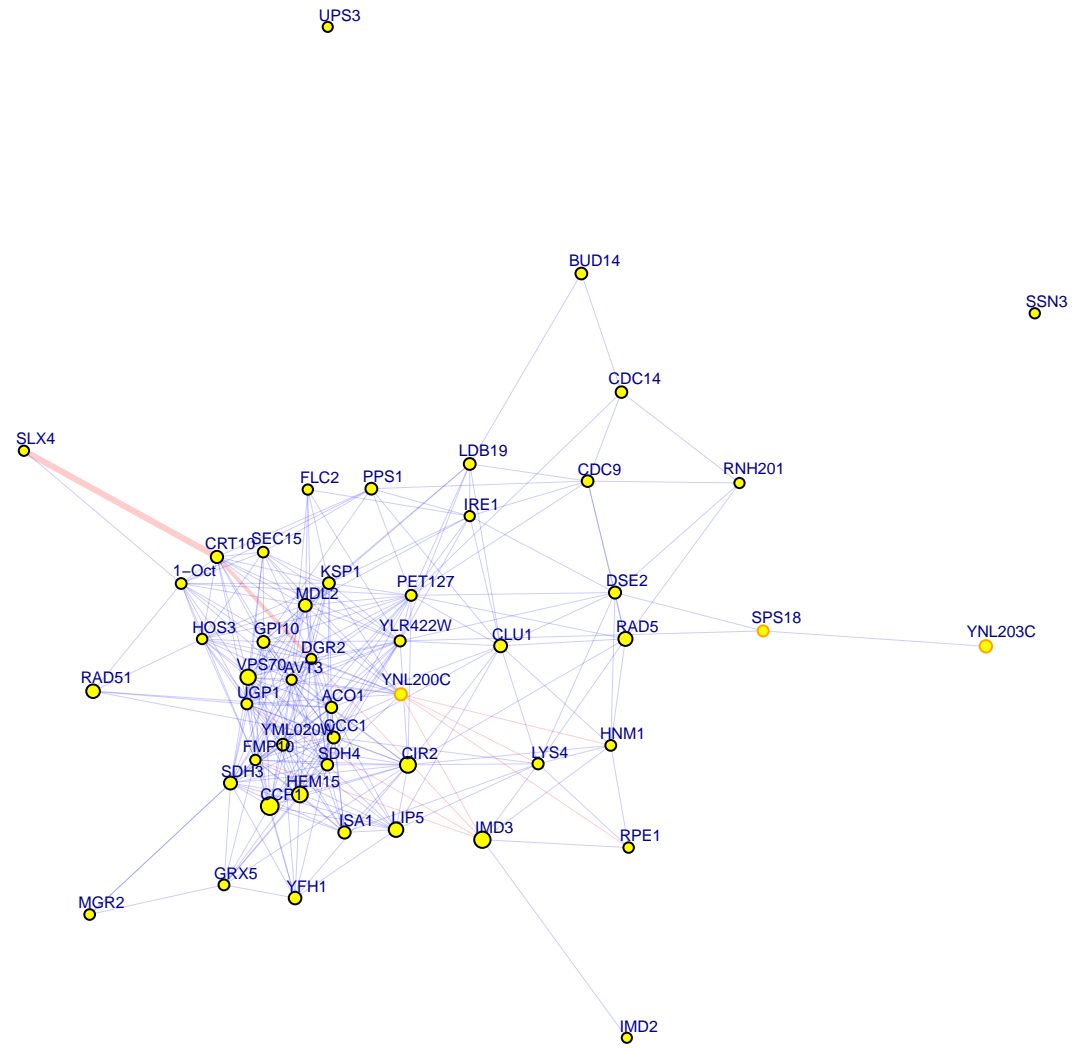

chrXIV:267161\_G/A top 100 up and down genes

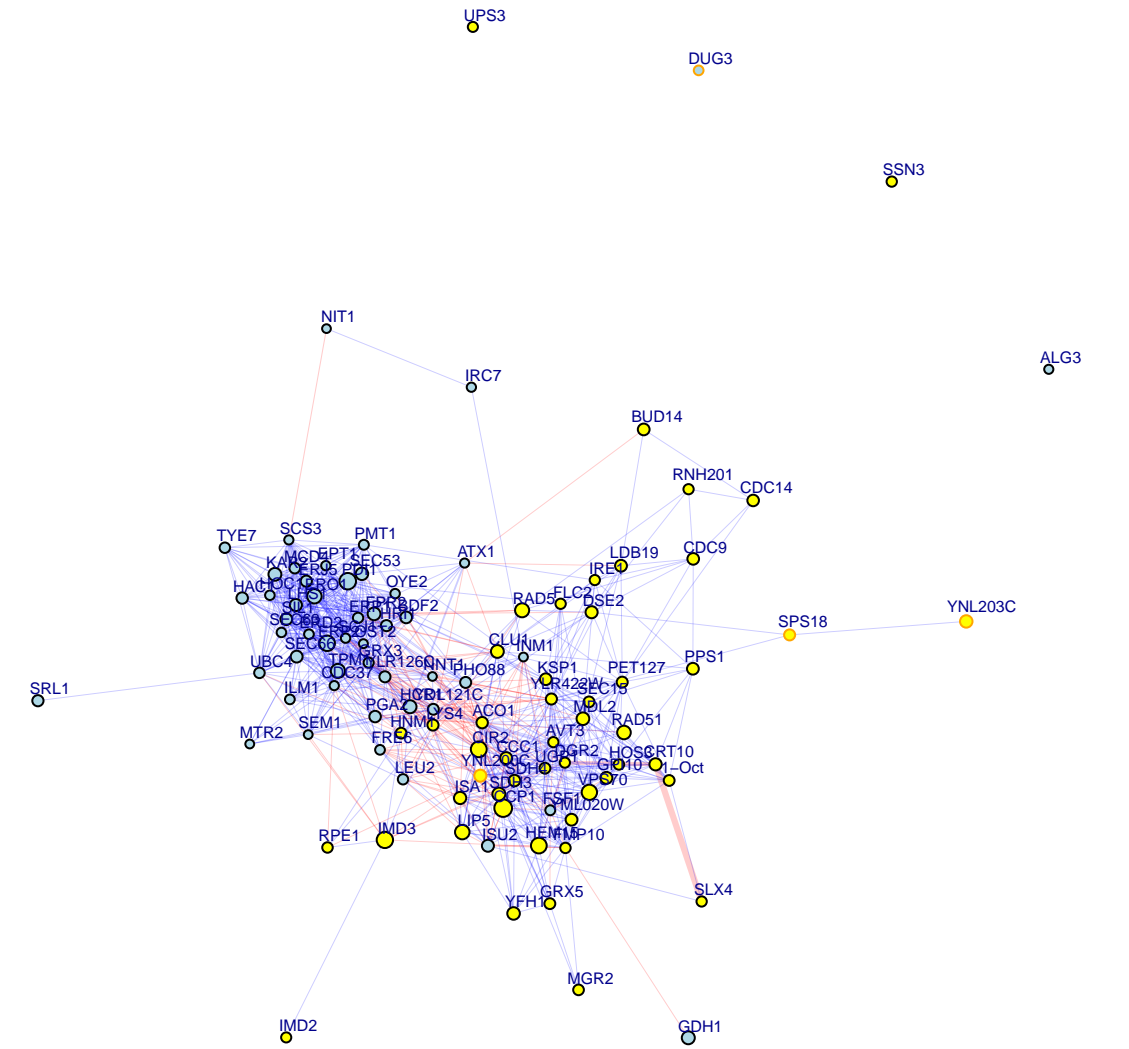

chrXIV:372376\_G/A top 50 up genes

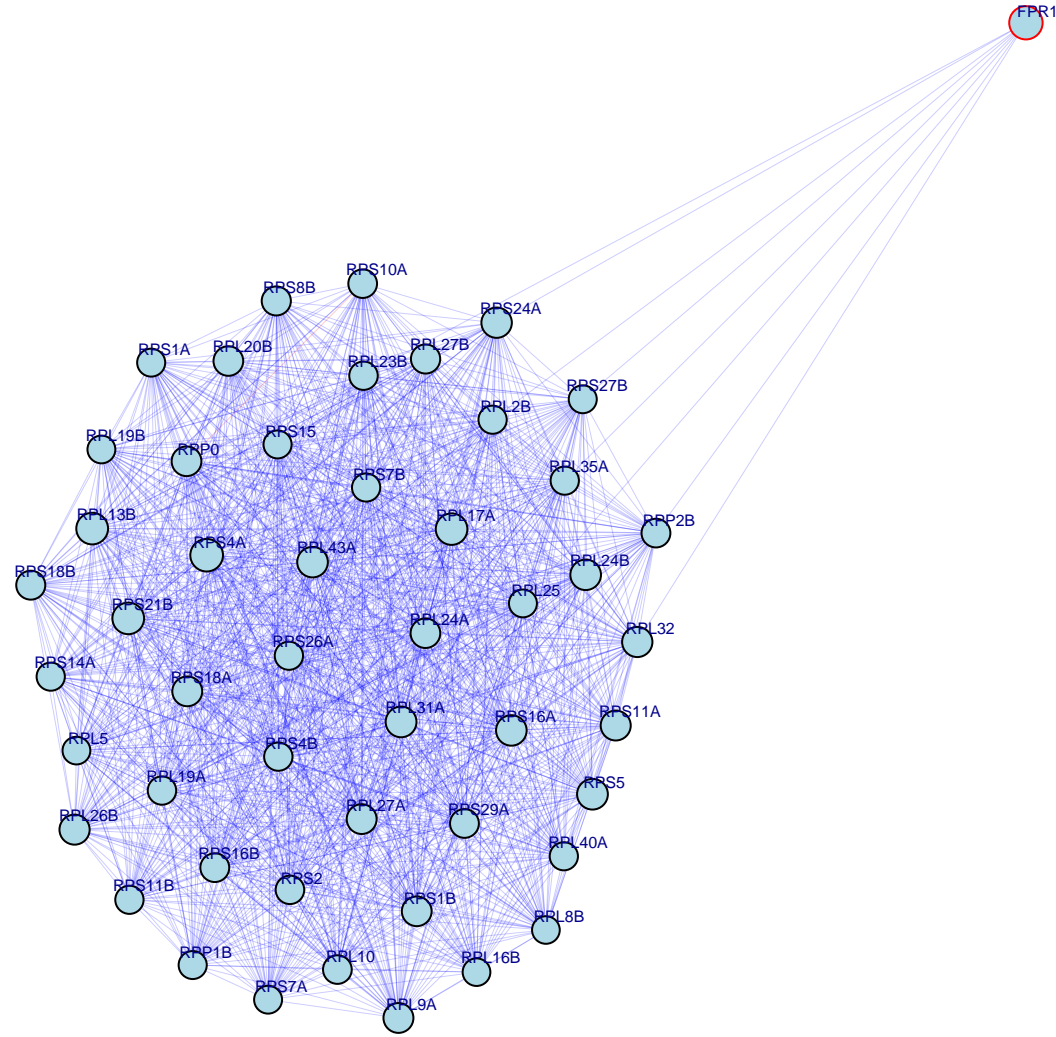

chrXIV:372376\_G/A top 50 down genes

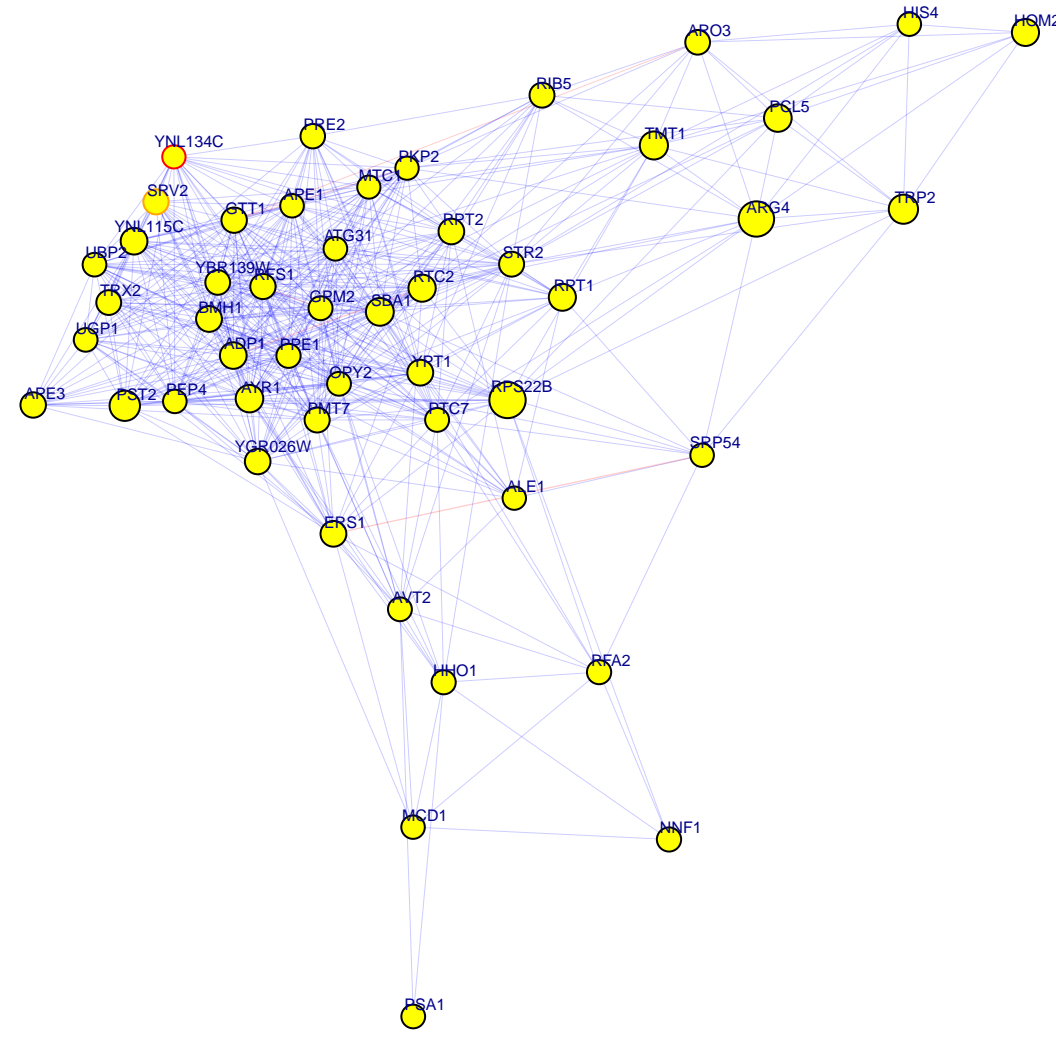

chrXIV:372376\_G/A top 100 up and down genes

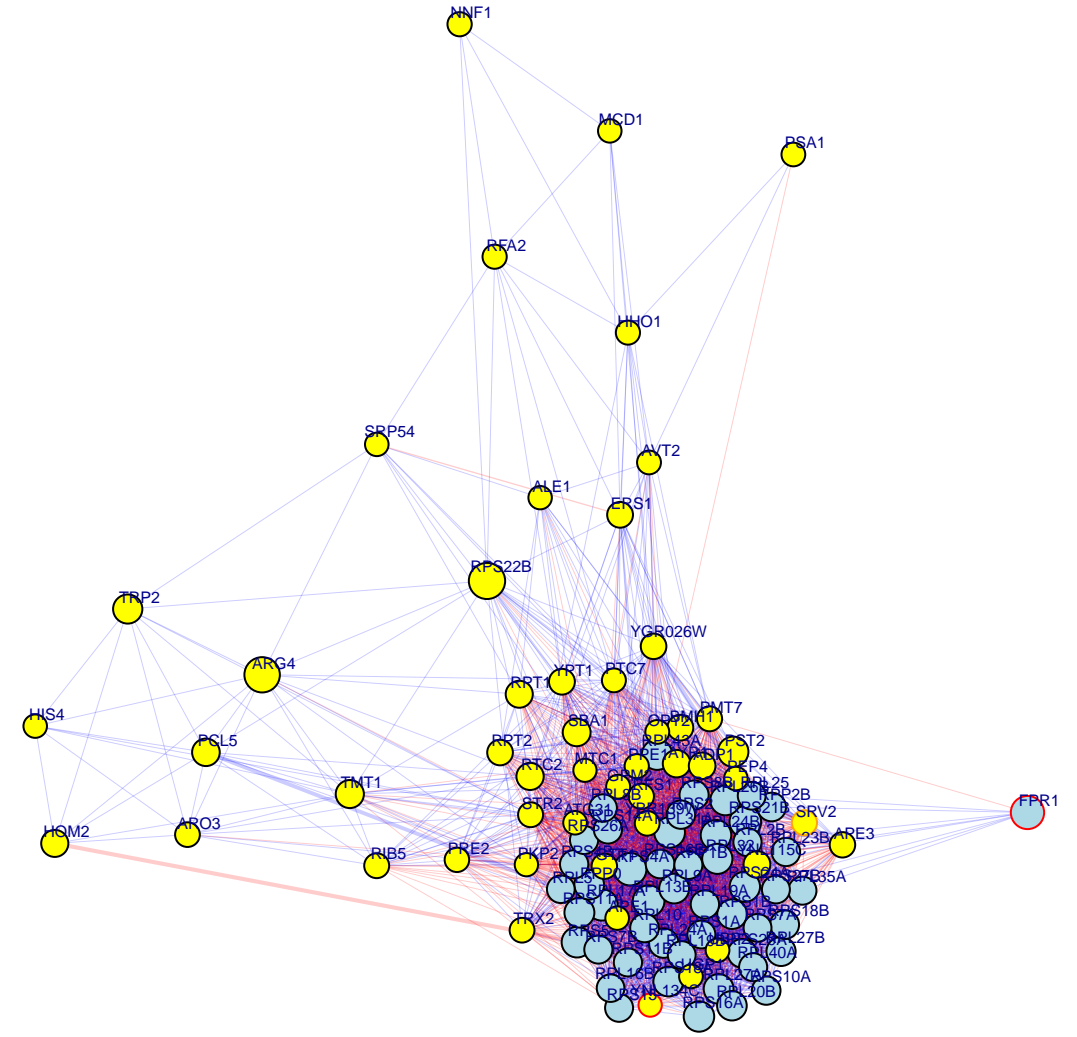

chrXIV:466588\_T/G top 50 up genes

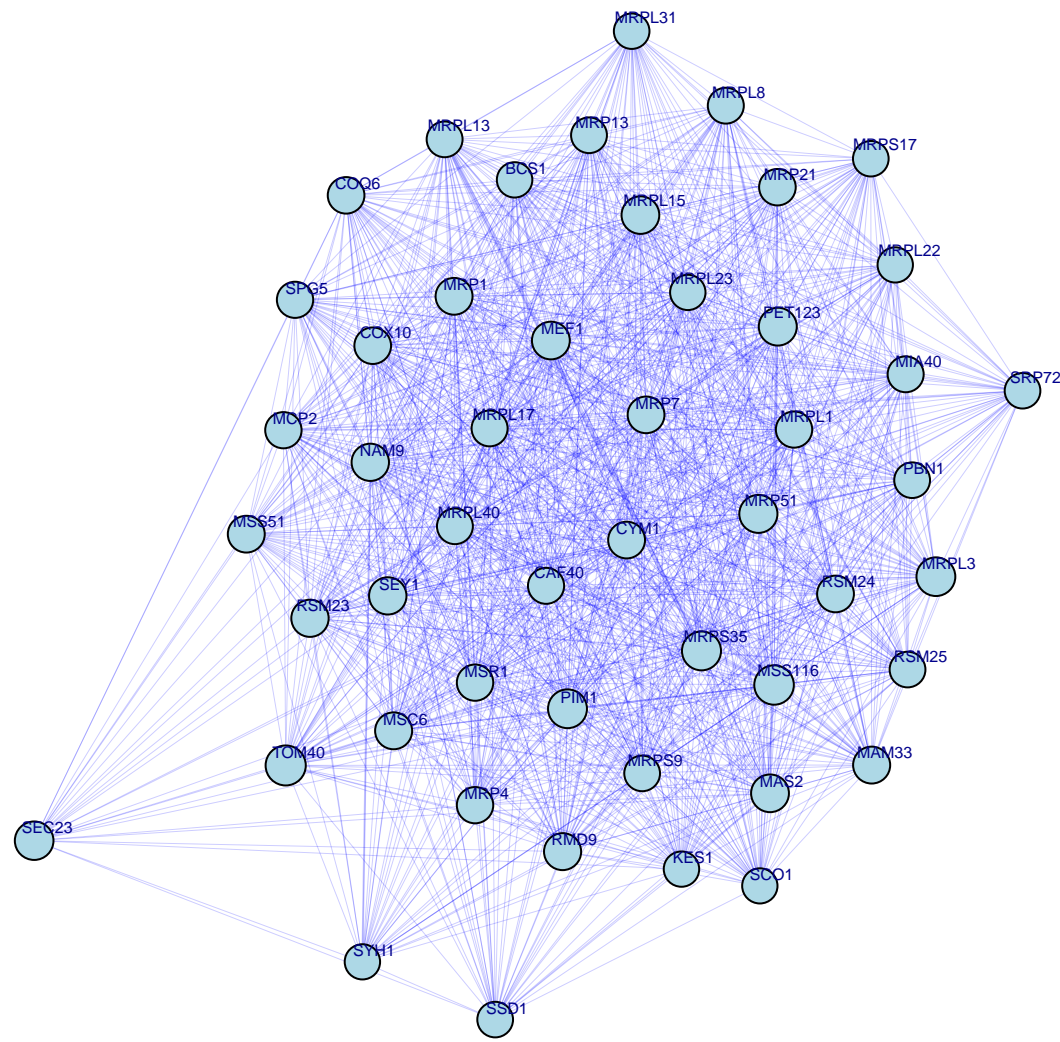

chrXIV:466588\_T/G top 50 down genes

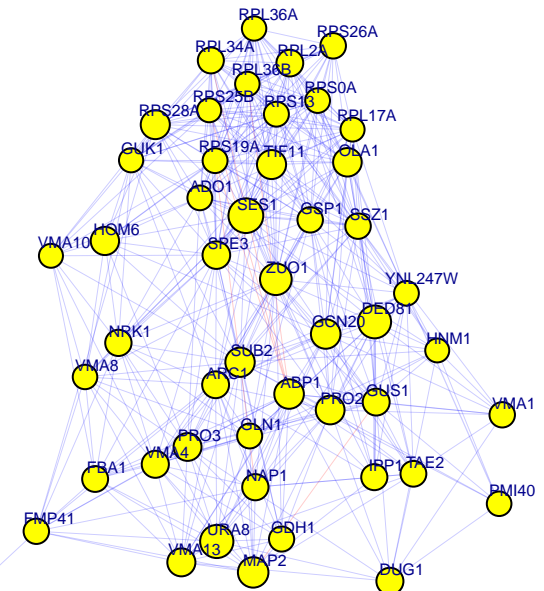

chrXIV:466588\_T/G top 100 up and down genes

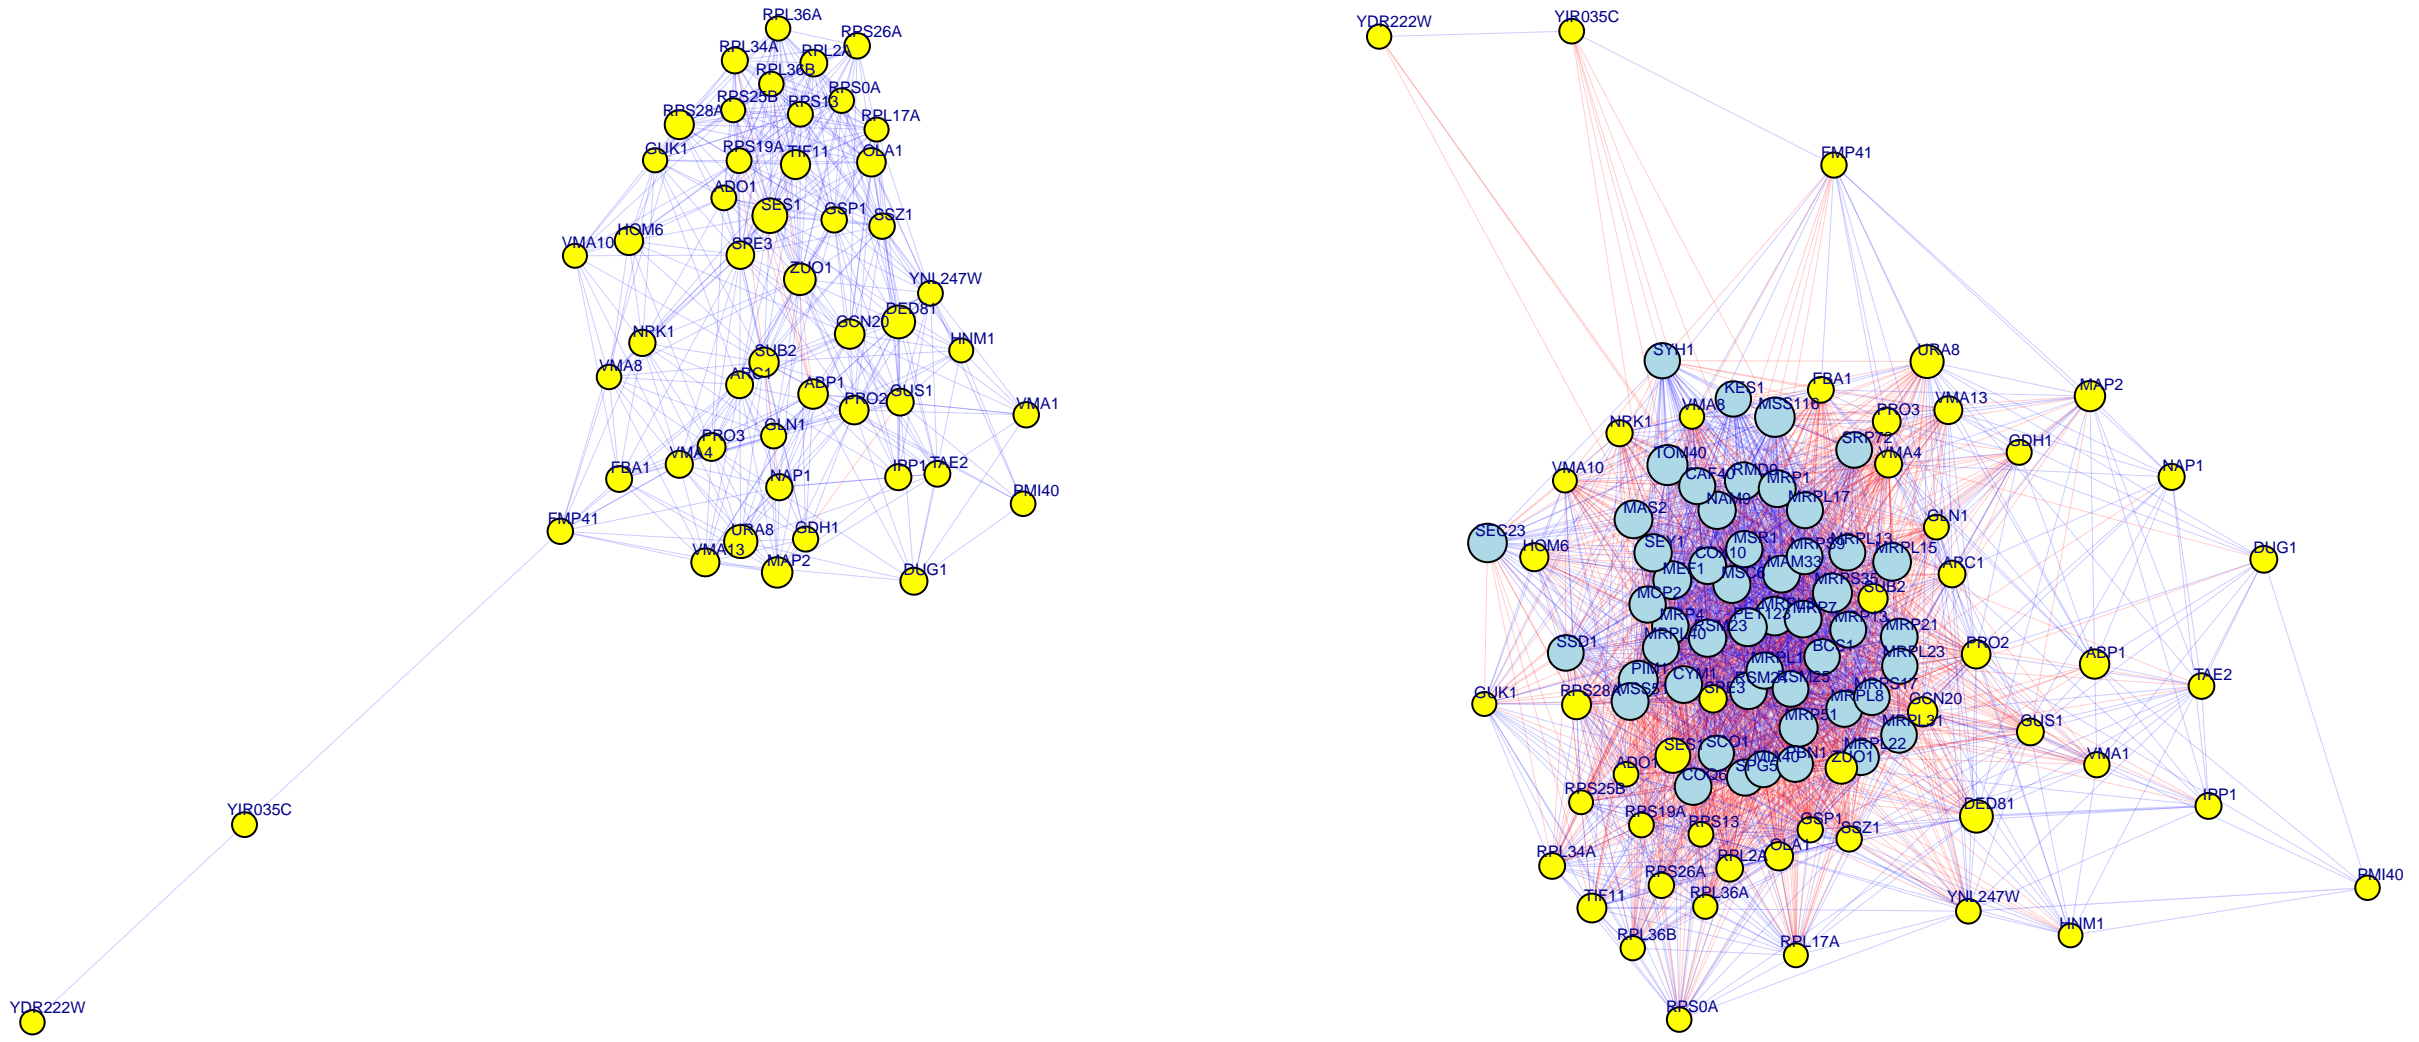

chrXIV:579945\_GTТА/G top 50 up genes

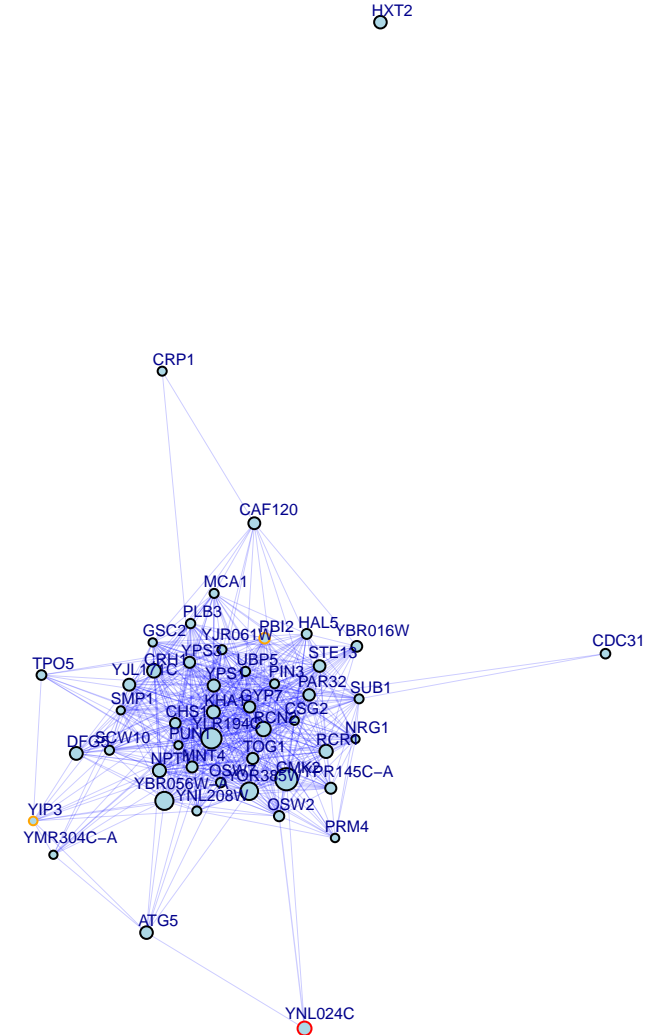

chrXIV:579945\_GTТА/G top 50 down genes

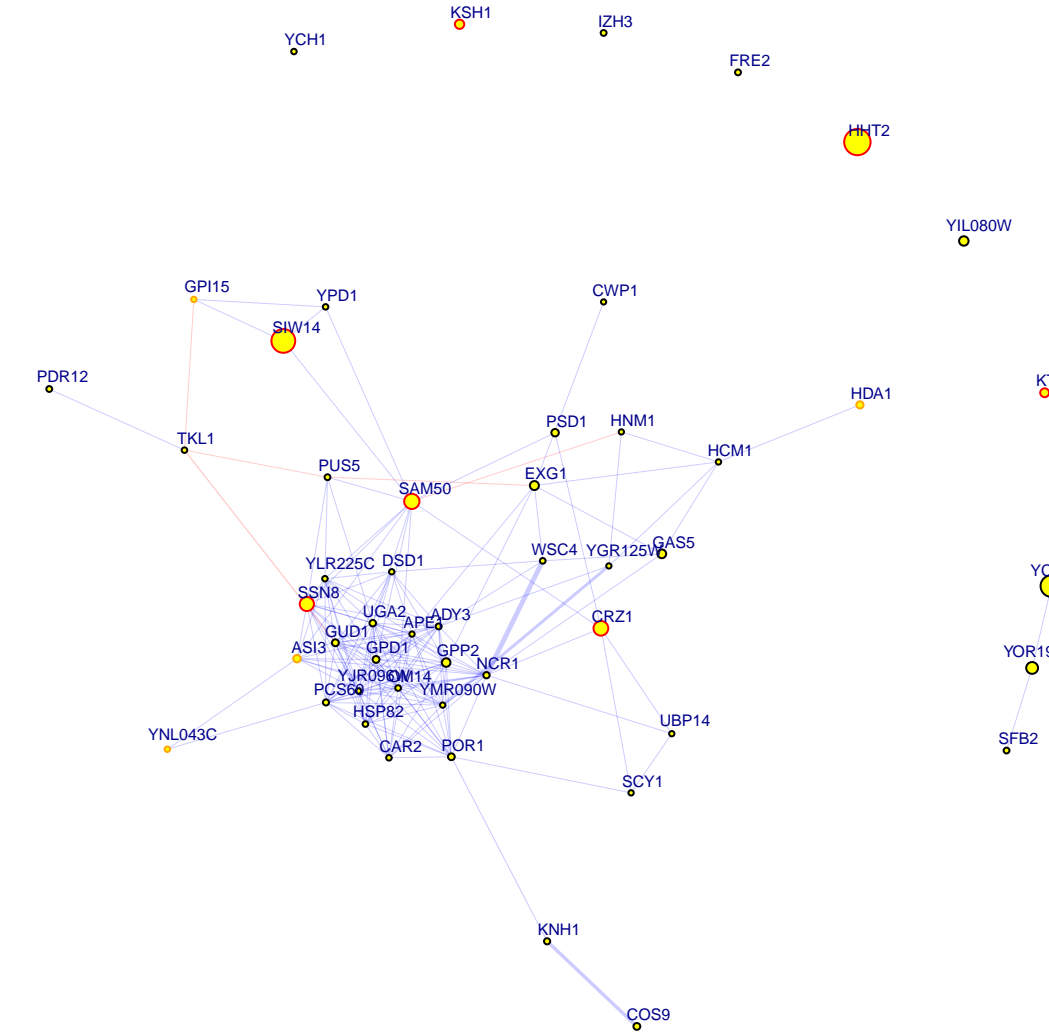

chrXIV:579945\_GTТА/G top 100 up and down genes

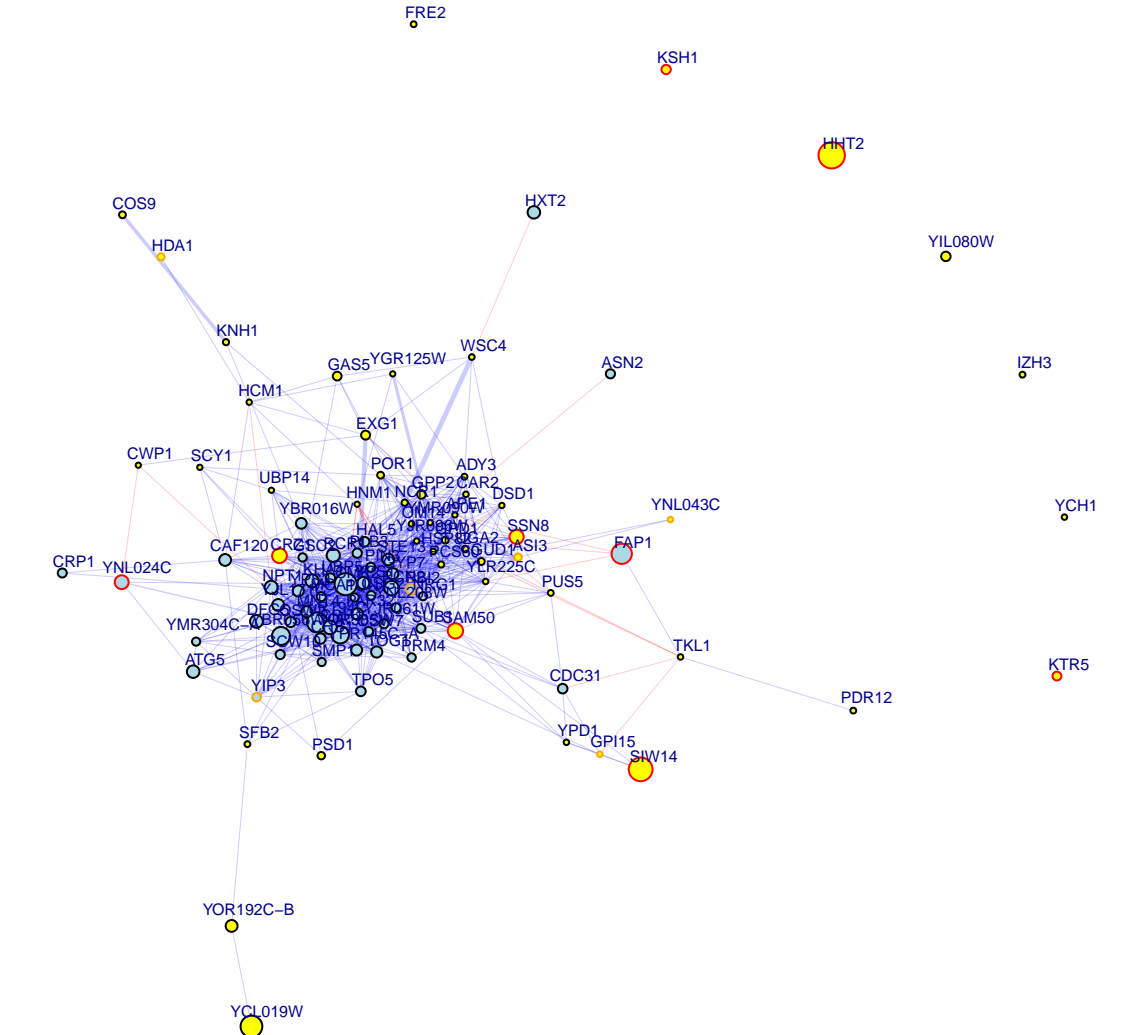

chrXV:56600\_G/C top 50 up genes

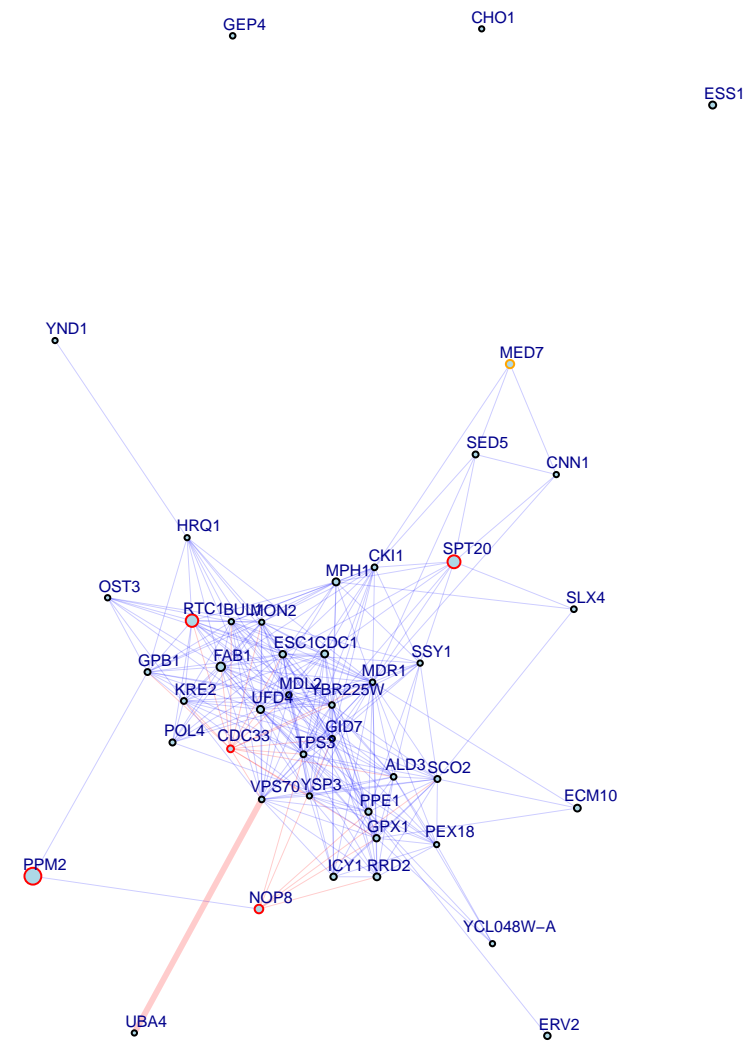

chrXV:56600\_G/C top 50 down genes

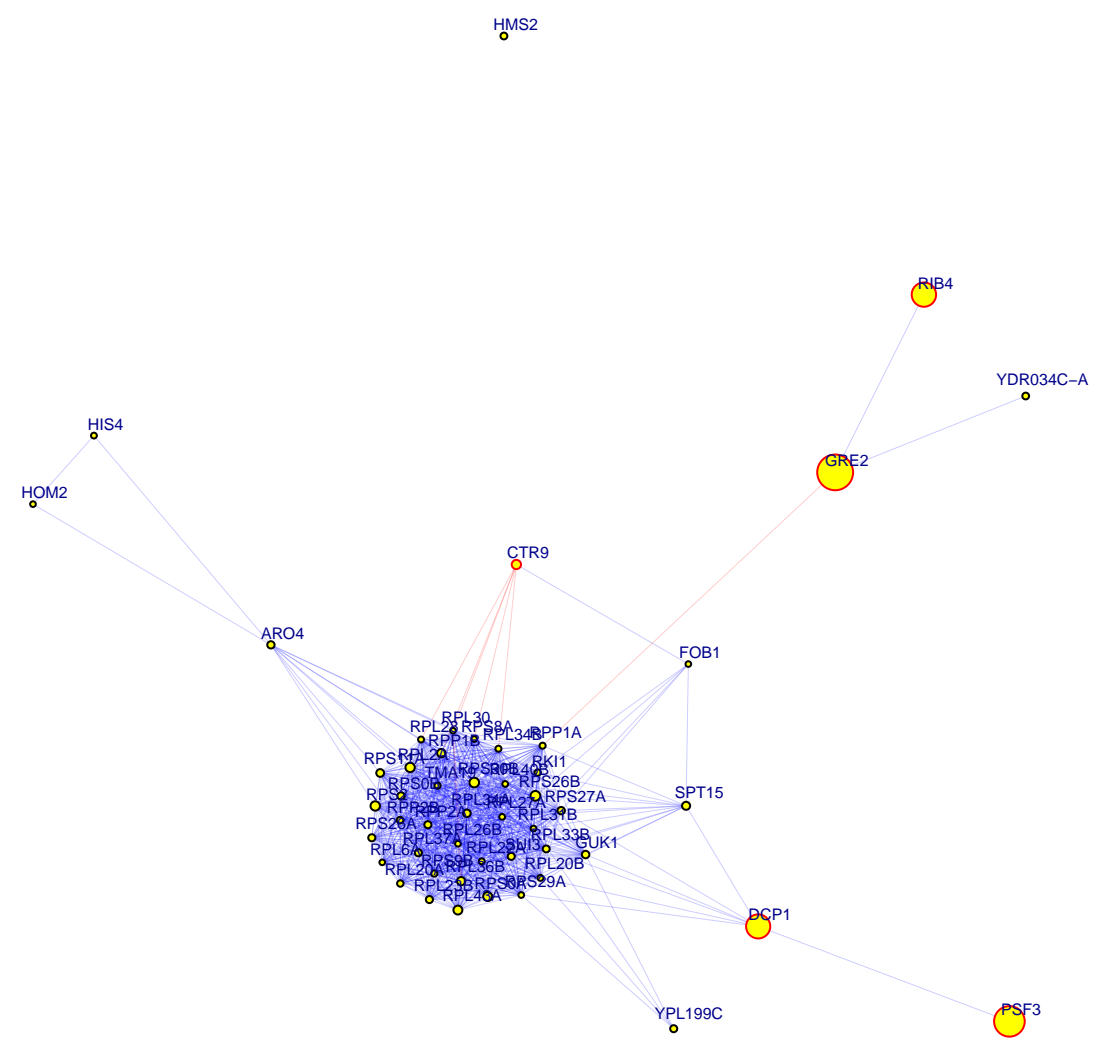

chrXV:56600\_G/C top 100 up and down genes

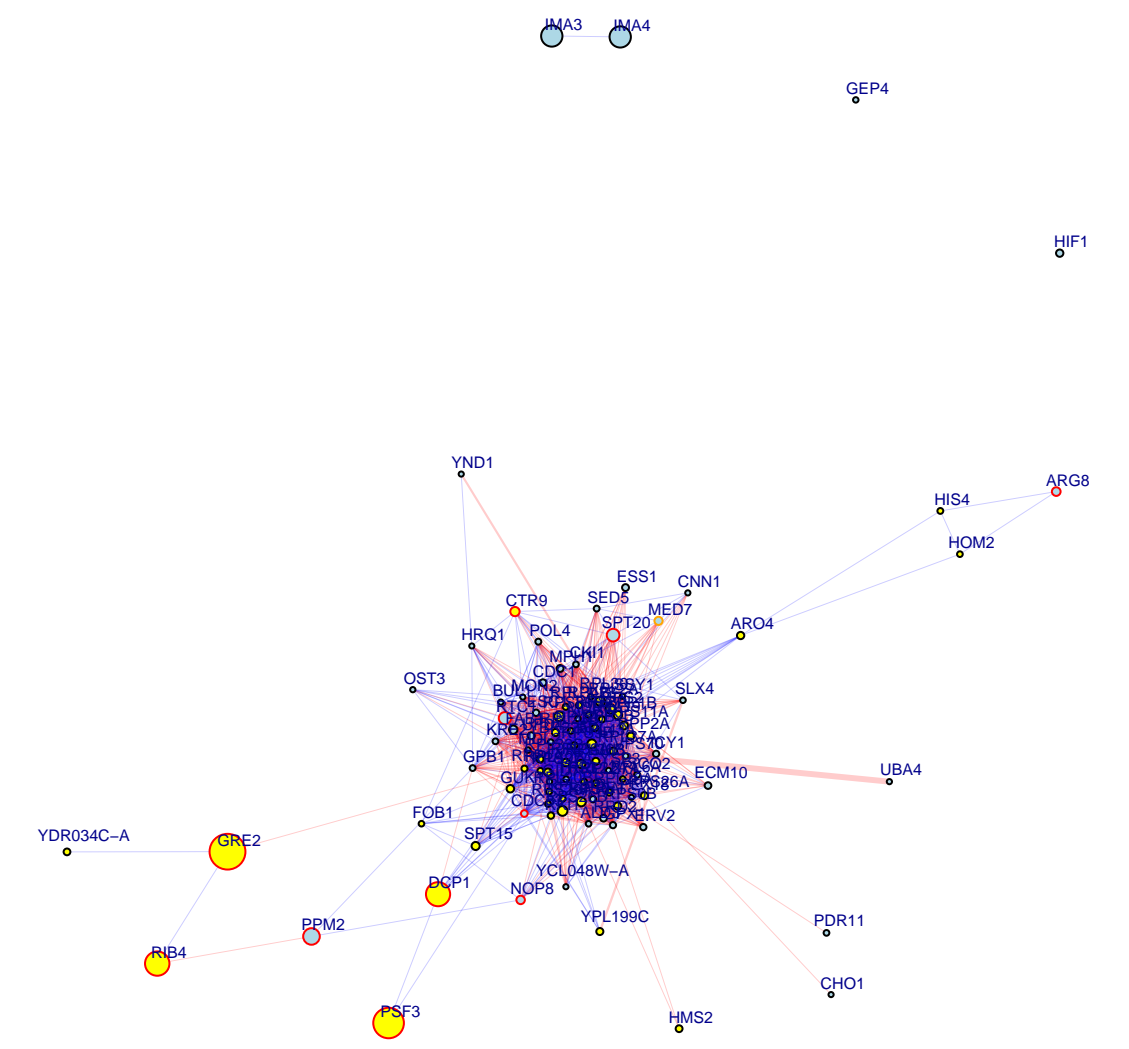

chrXV:150803\_G/A top 50 up genes

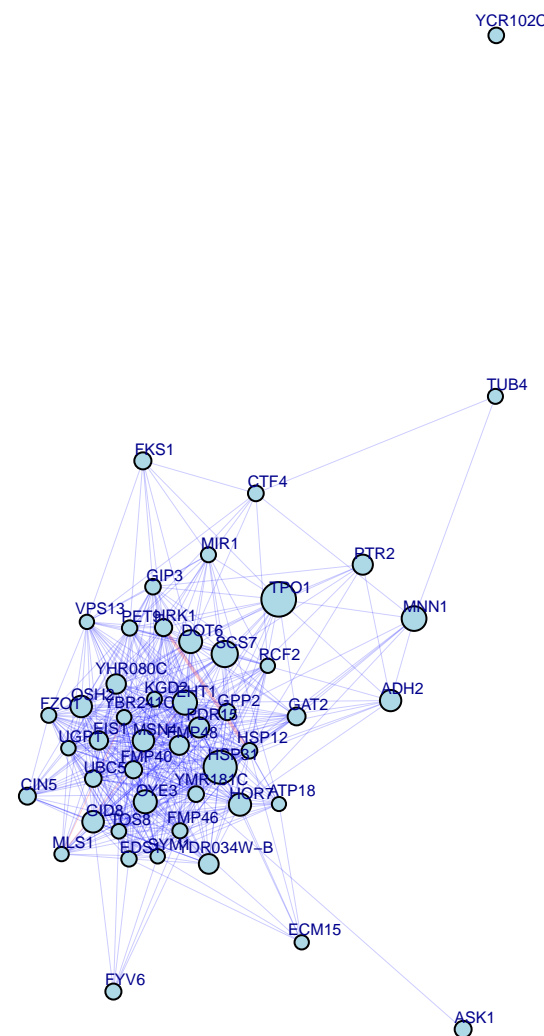

chrXV:150803\_G/A top 50 down genes

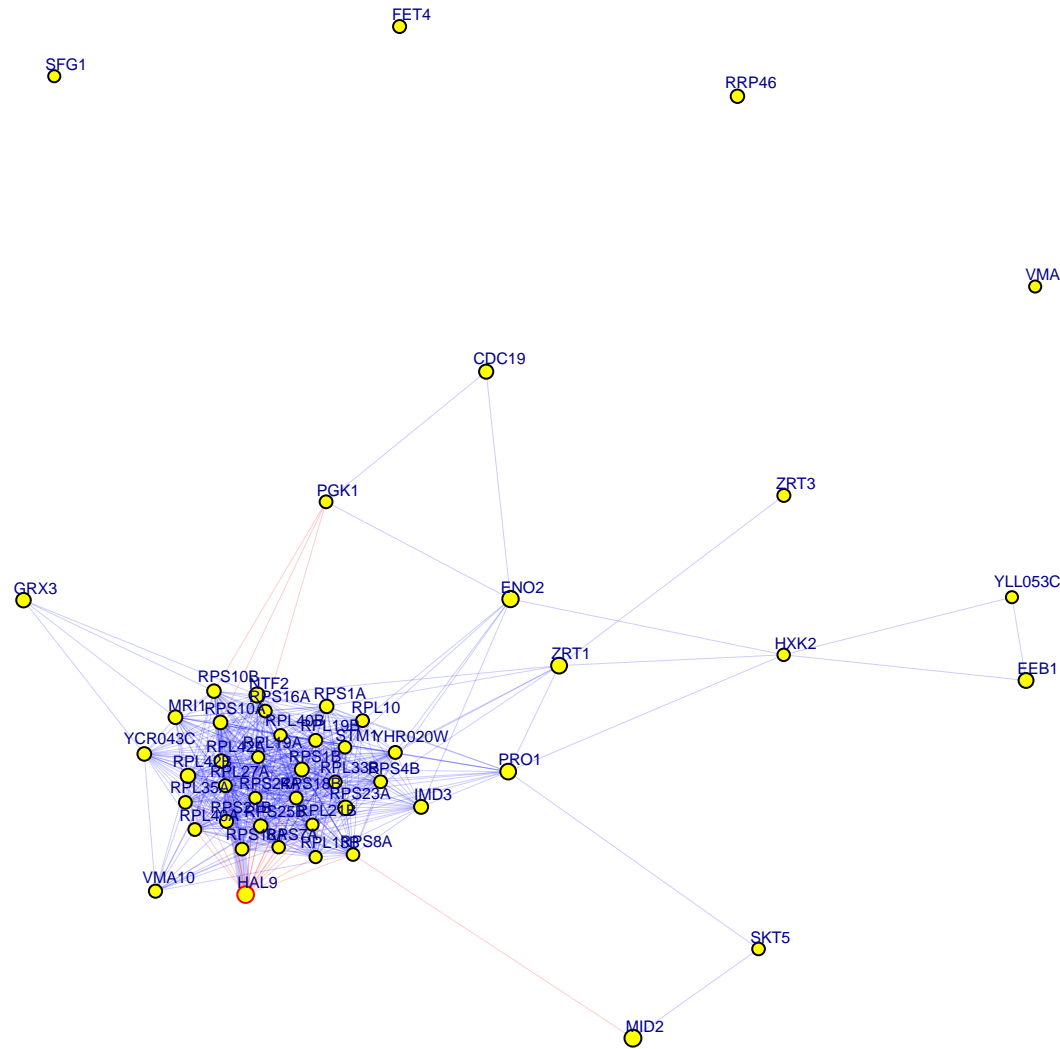

chrXV:150803\_G/A top 100 up and down genes

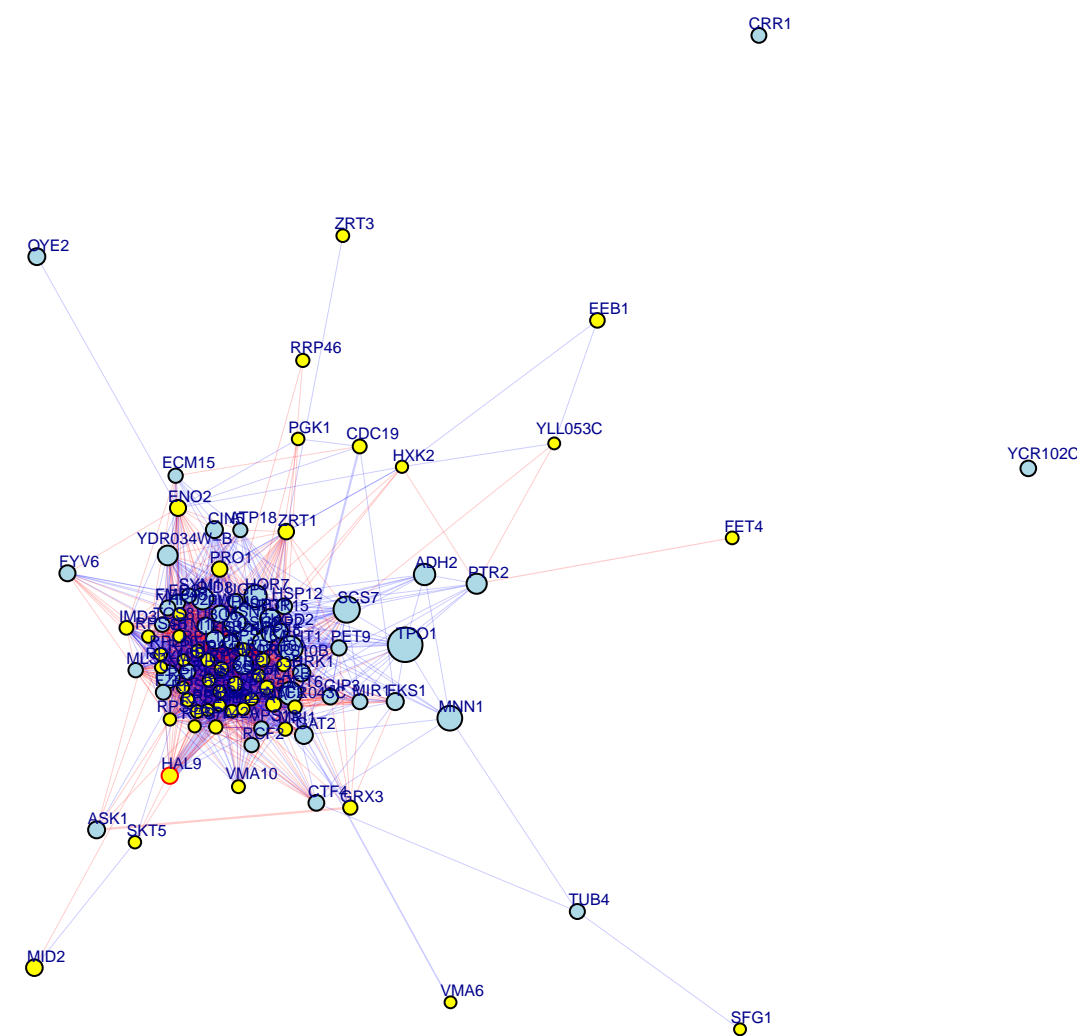

chrXV:171150\_T/C top 50 up genes

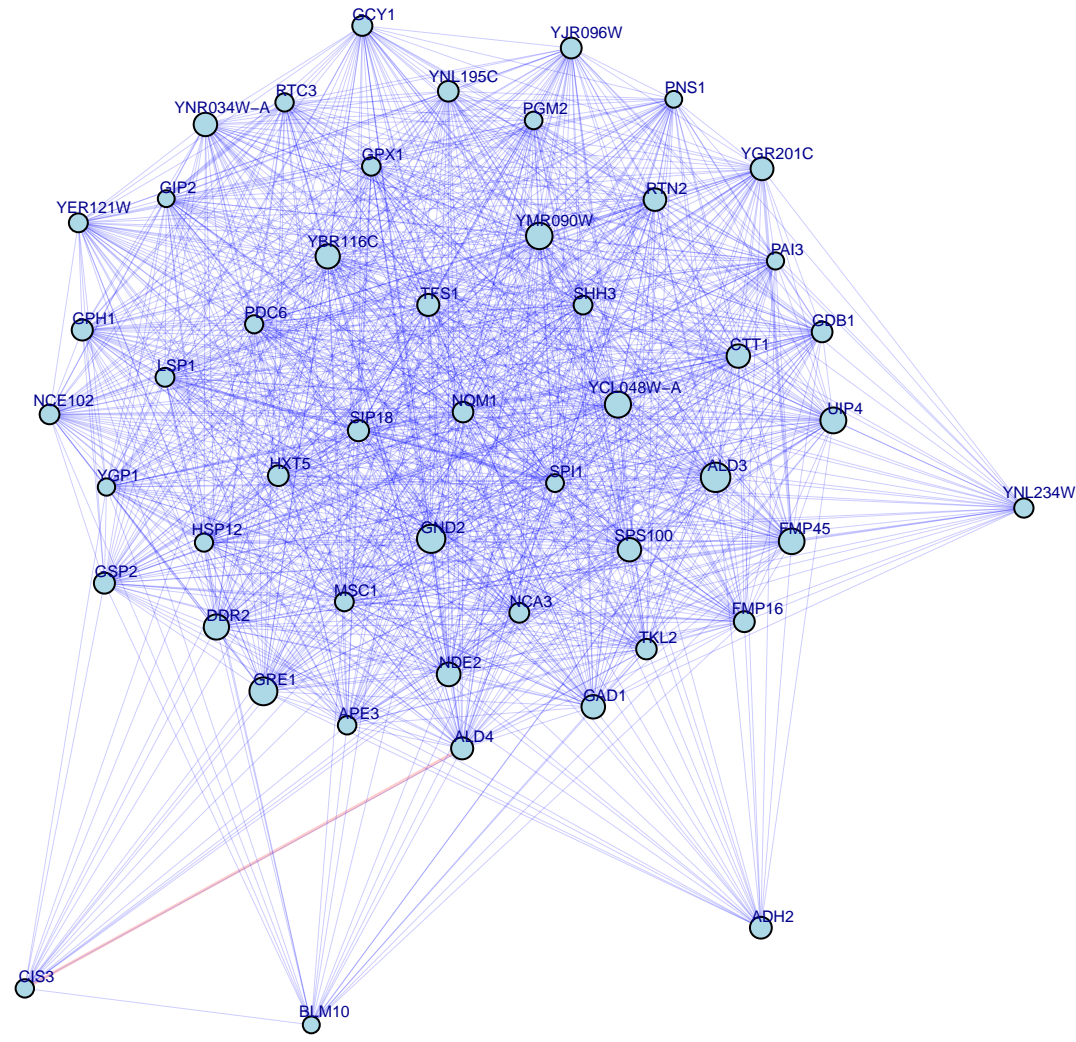

chrXV:171150\_T/C top 50 down genes

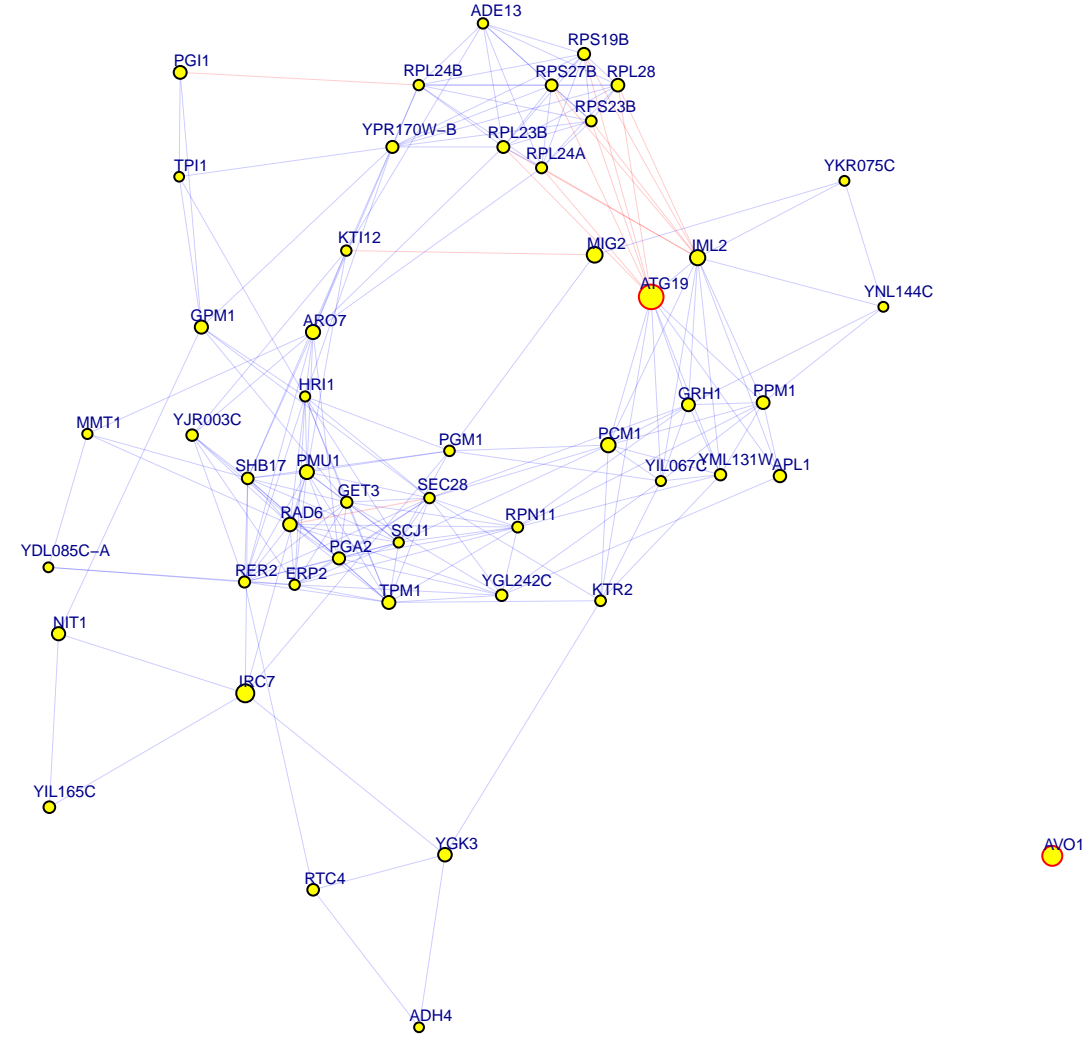

chrXV:171150\_T/C top 100 up and down genes

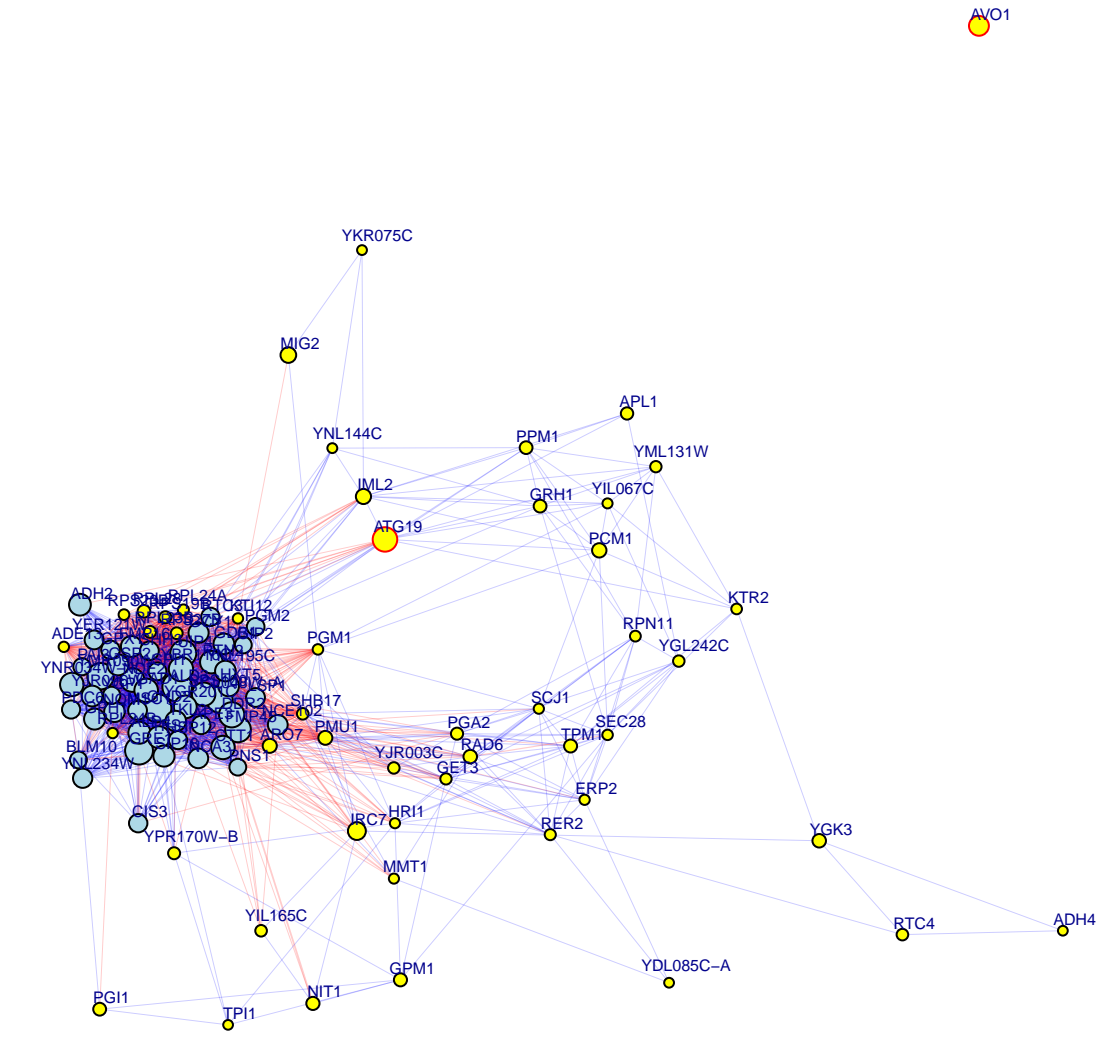

AVO1

AVO1





chrXV:521864\_C/T top 50 up genes

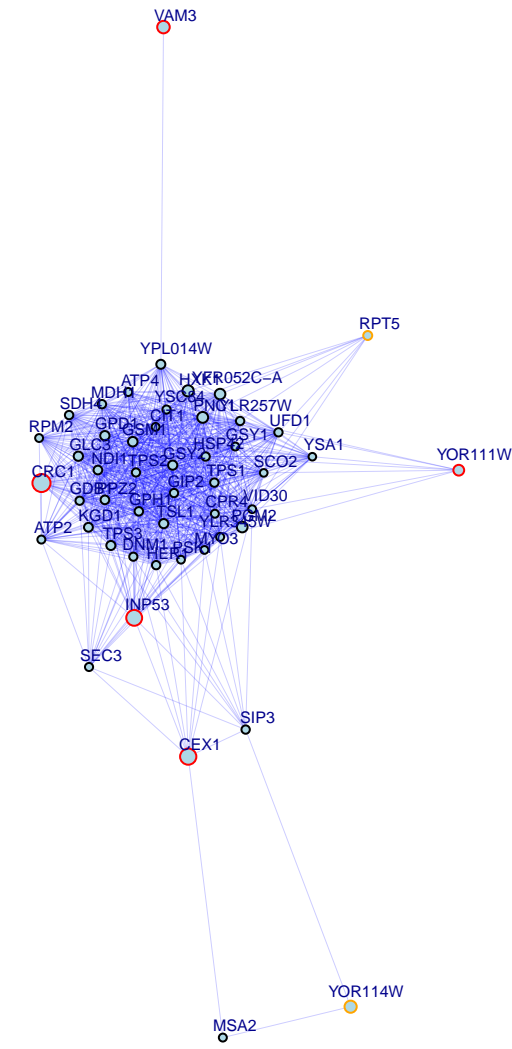

chrXV:521864\_C/T top 50 down genes

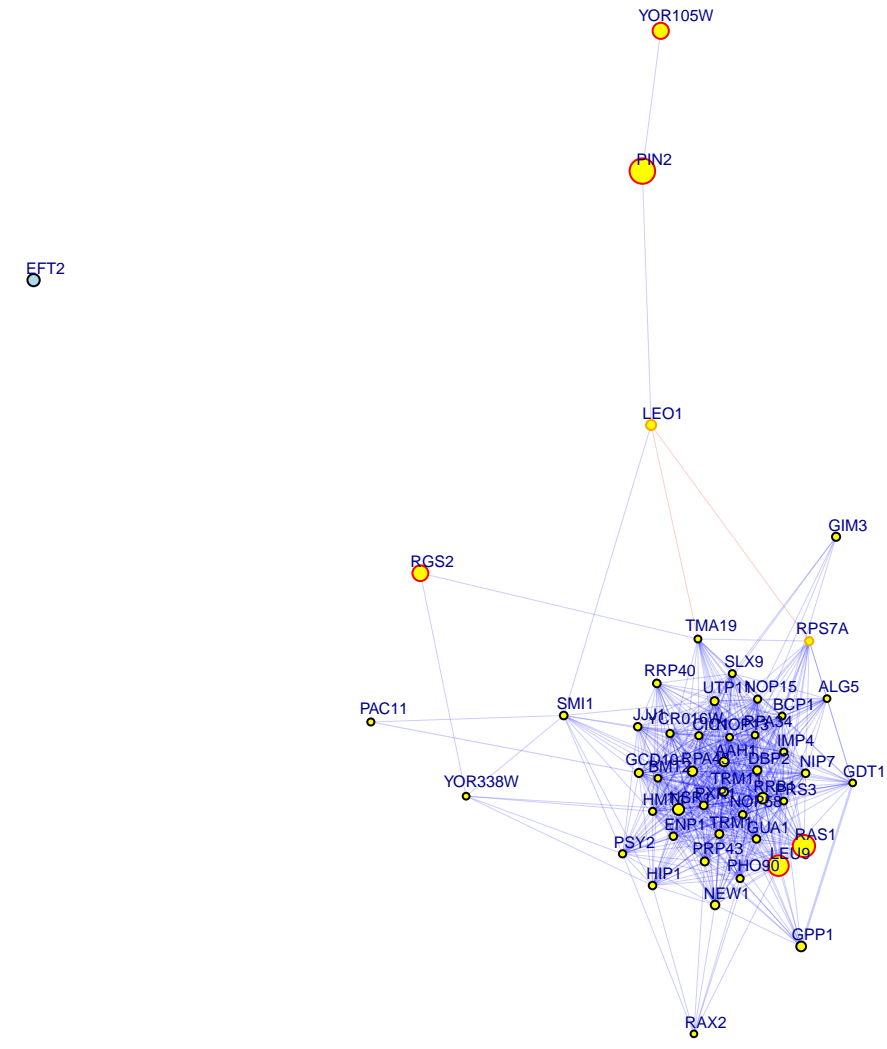

chrXV:521864\_C/T top 100 up and down genes

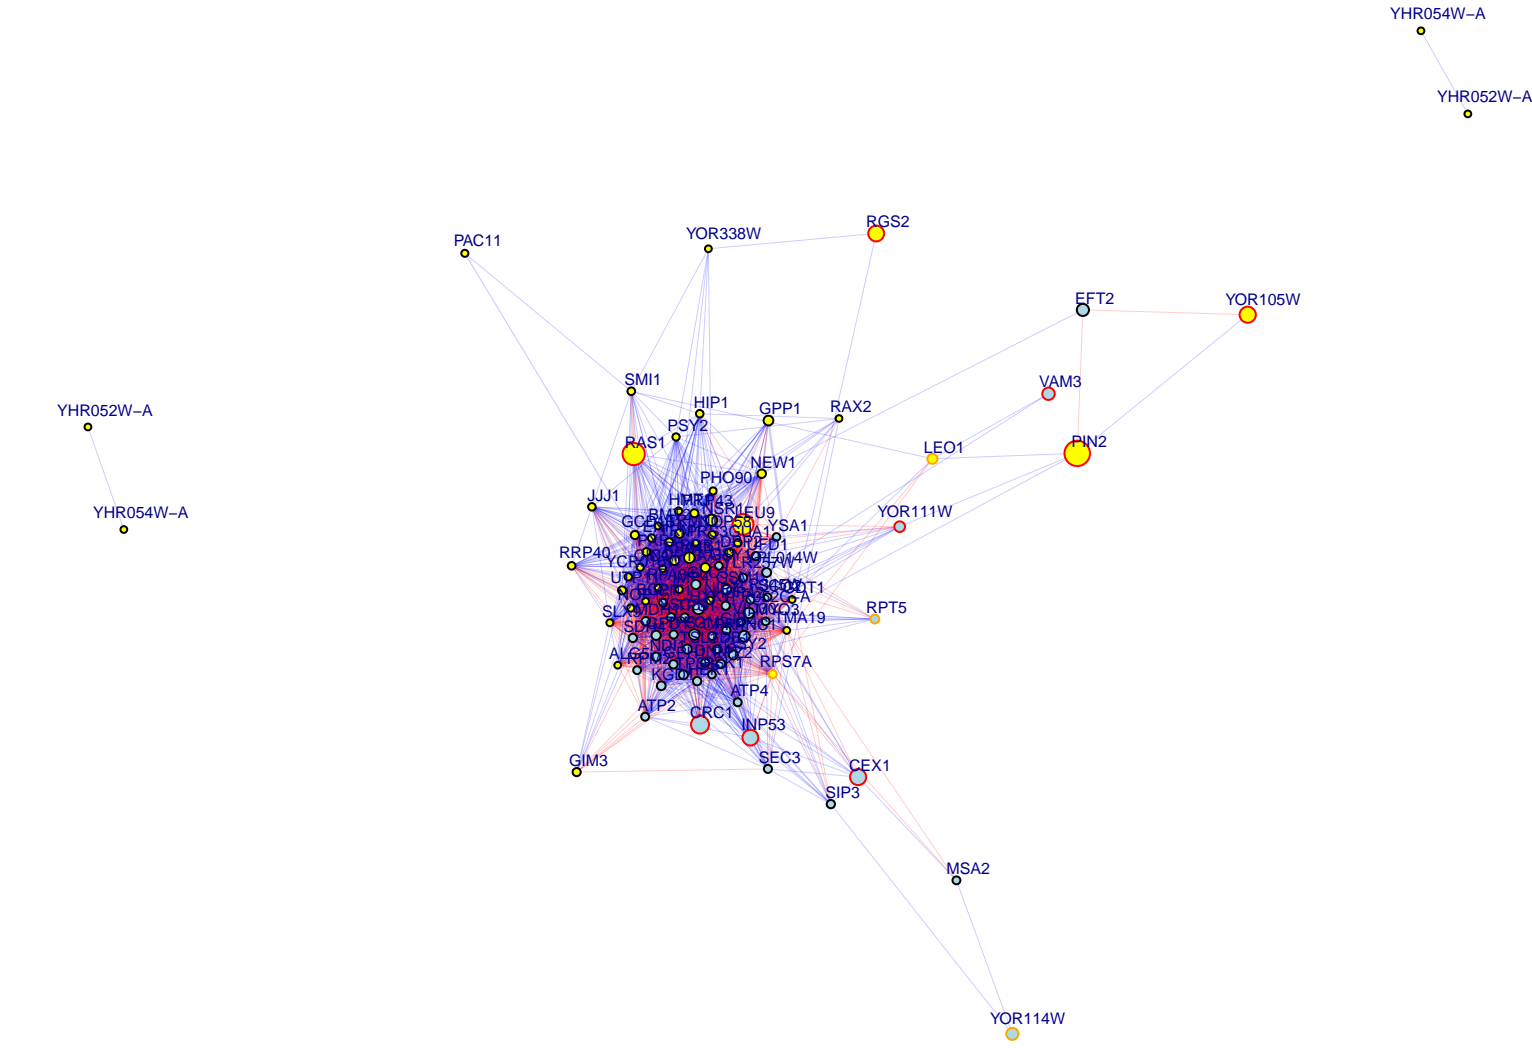

chrXV:589481\_C/T top 50 up genes

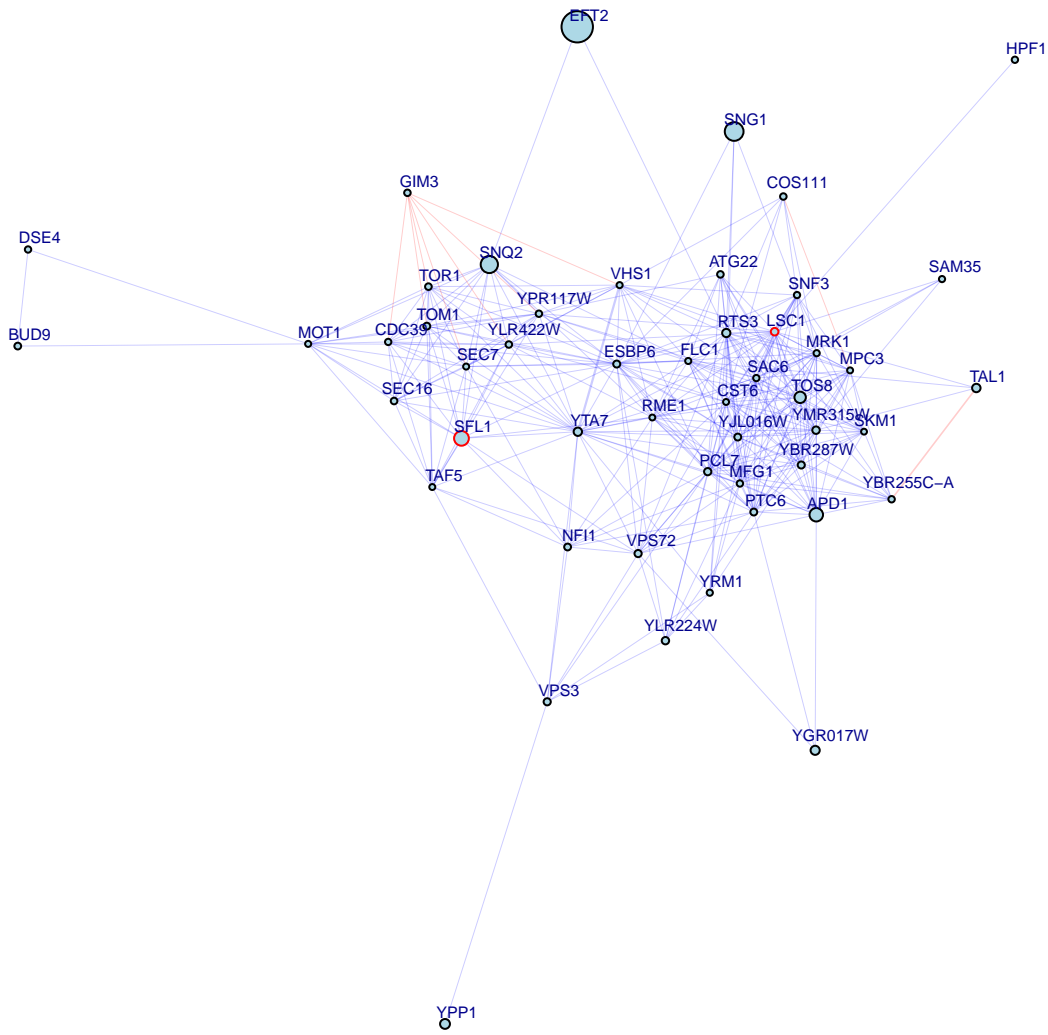

chrXV:589481\_C/T top 50 down genes

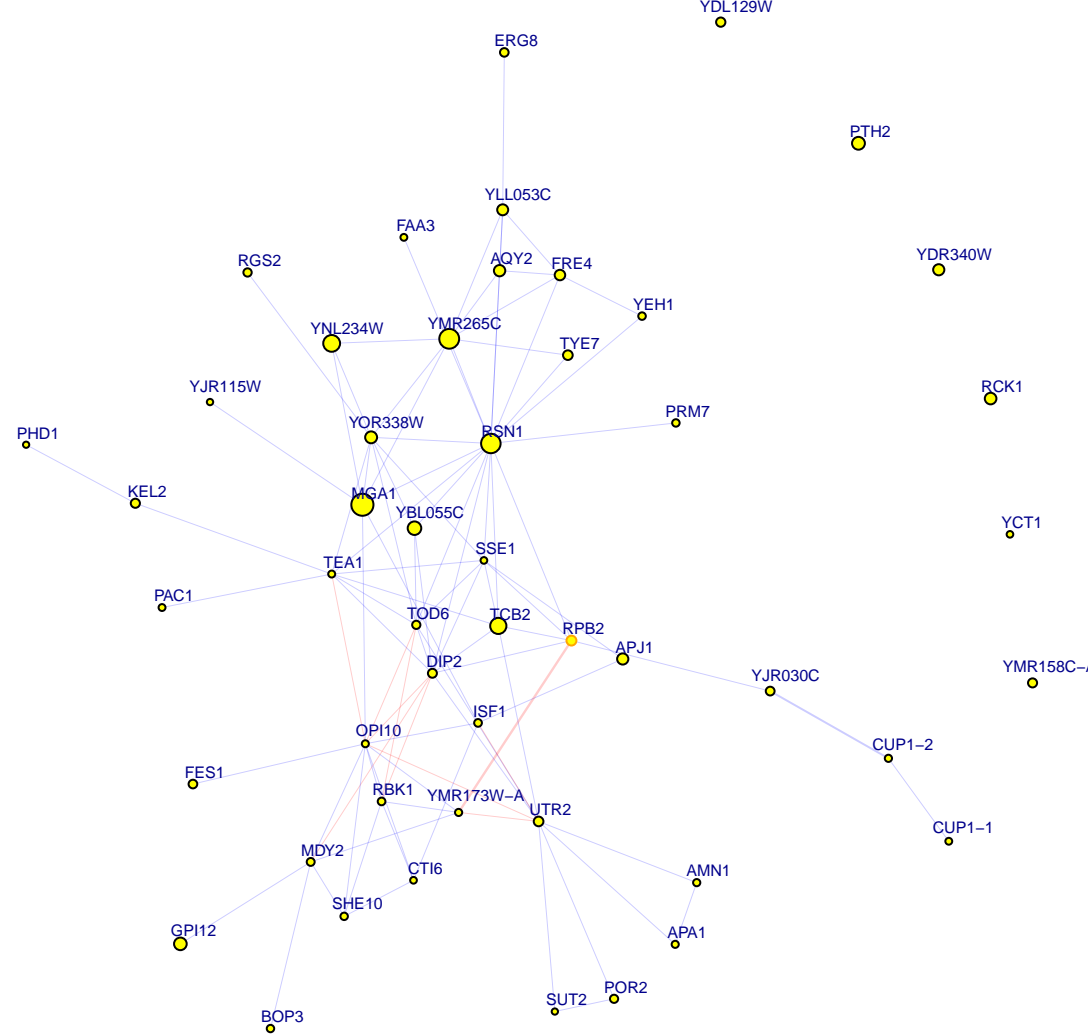

chrXV:589481\_C/T top 100 up and down genes

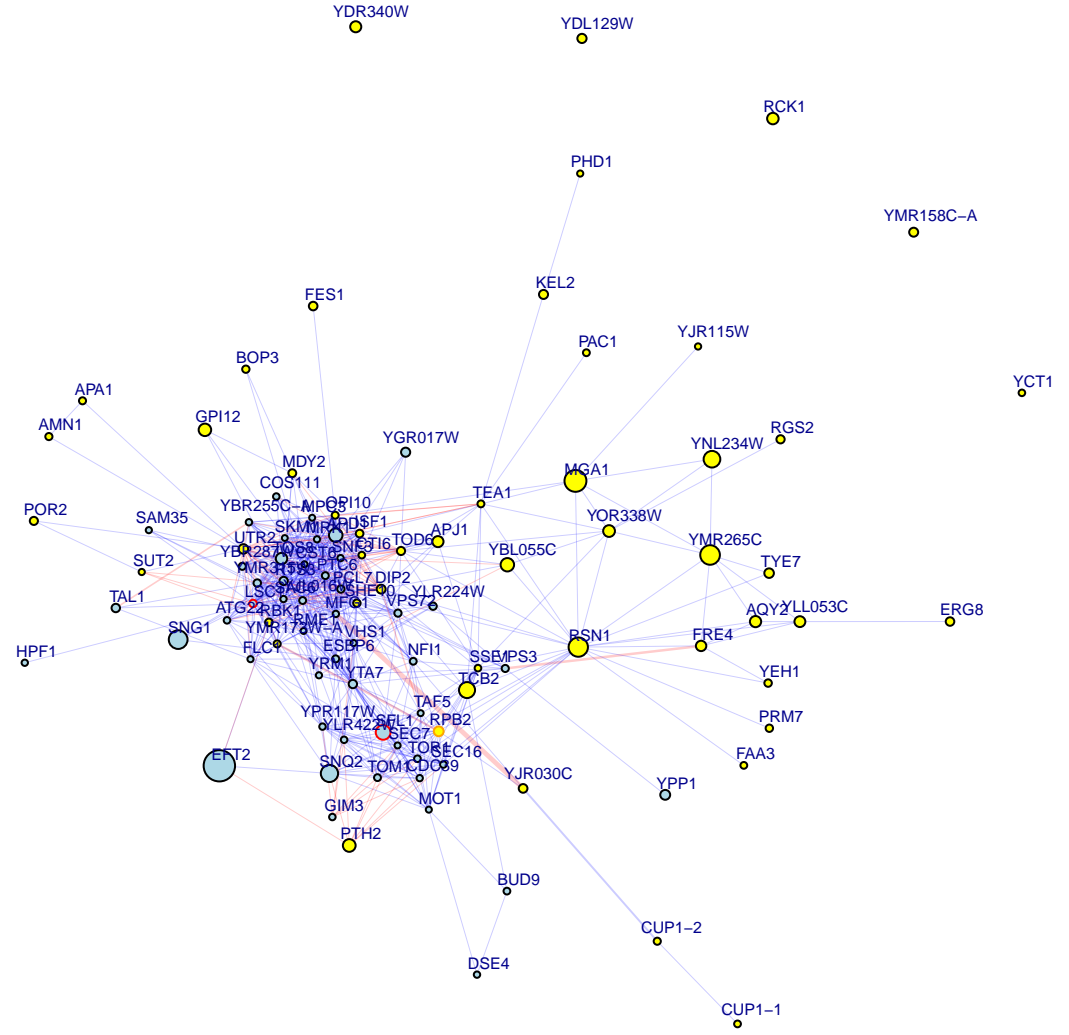

chrXV:725113\_T/C top 50 up genes

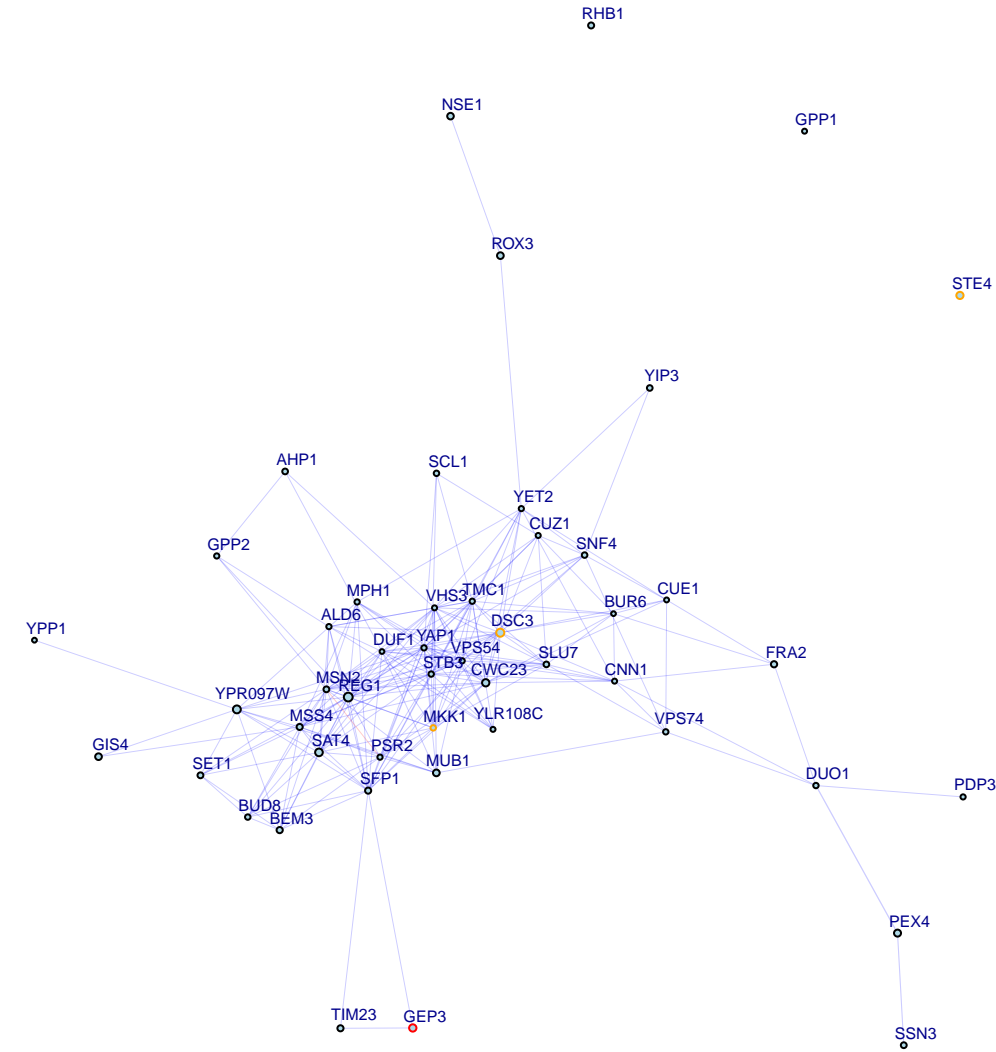

chrXV:725113\_T/C top 50 down genes

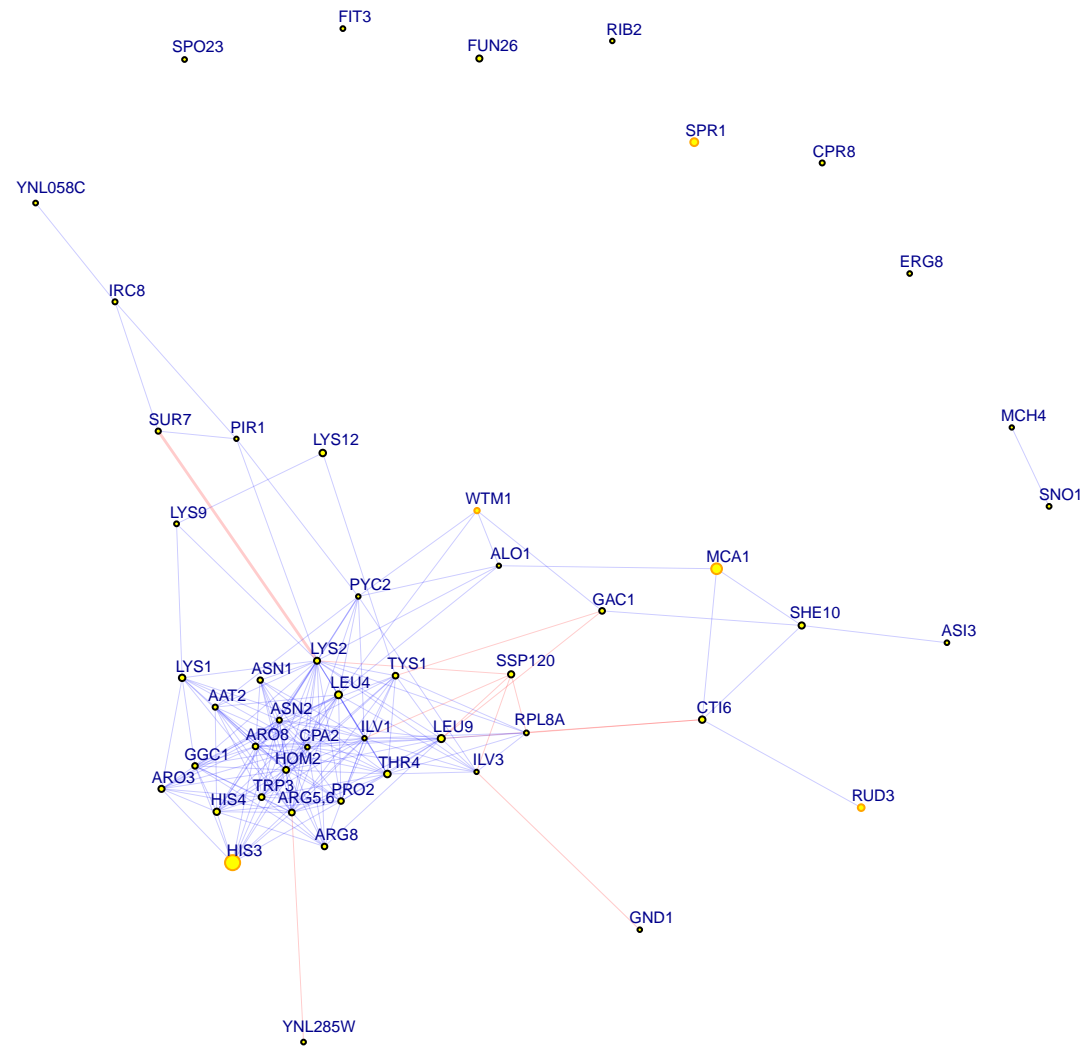

chrXV:725113\_T/C top 100 up and down genes

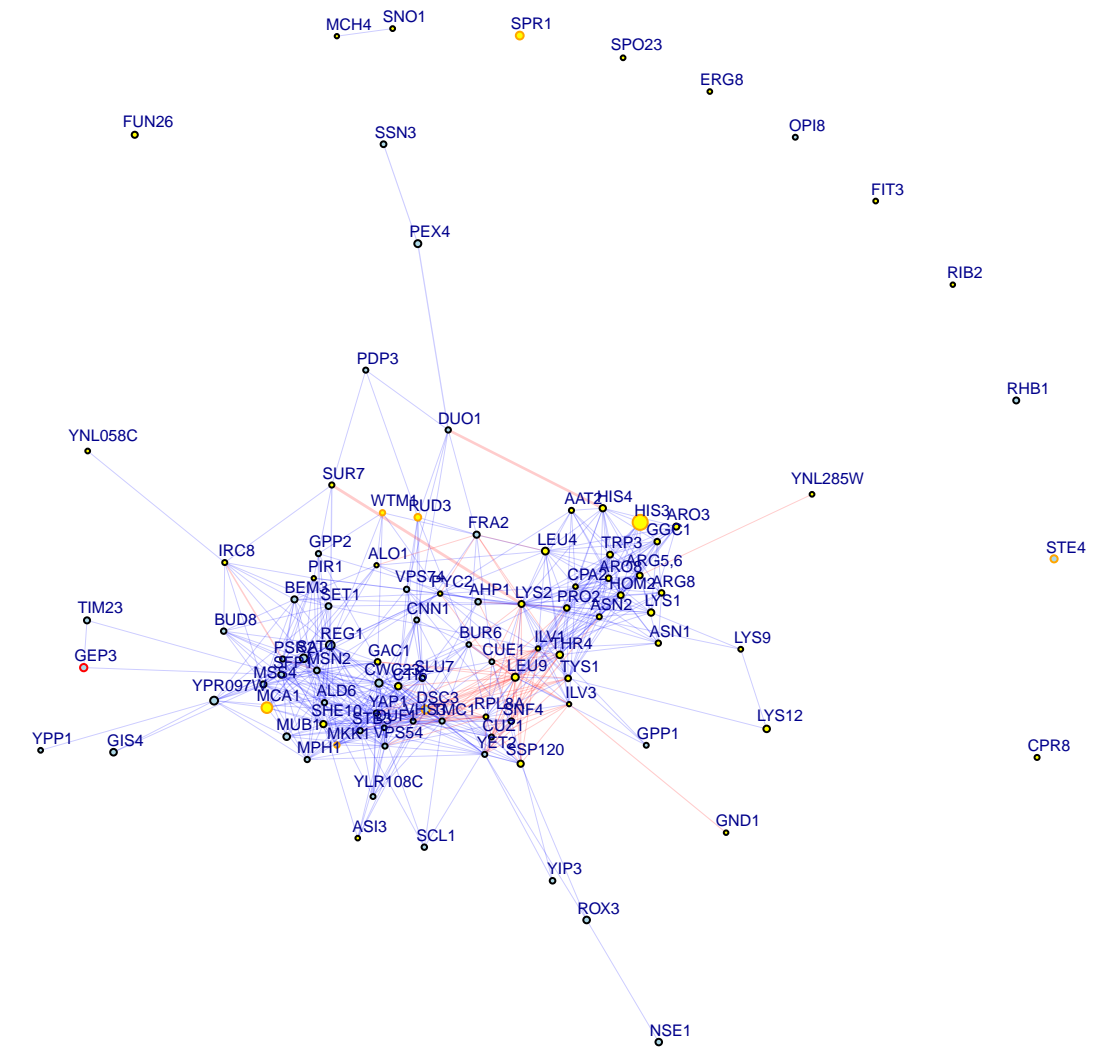

chrXV:845199\_G/A top 50 up genes

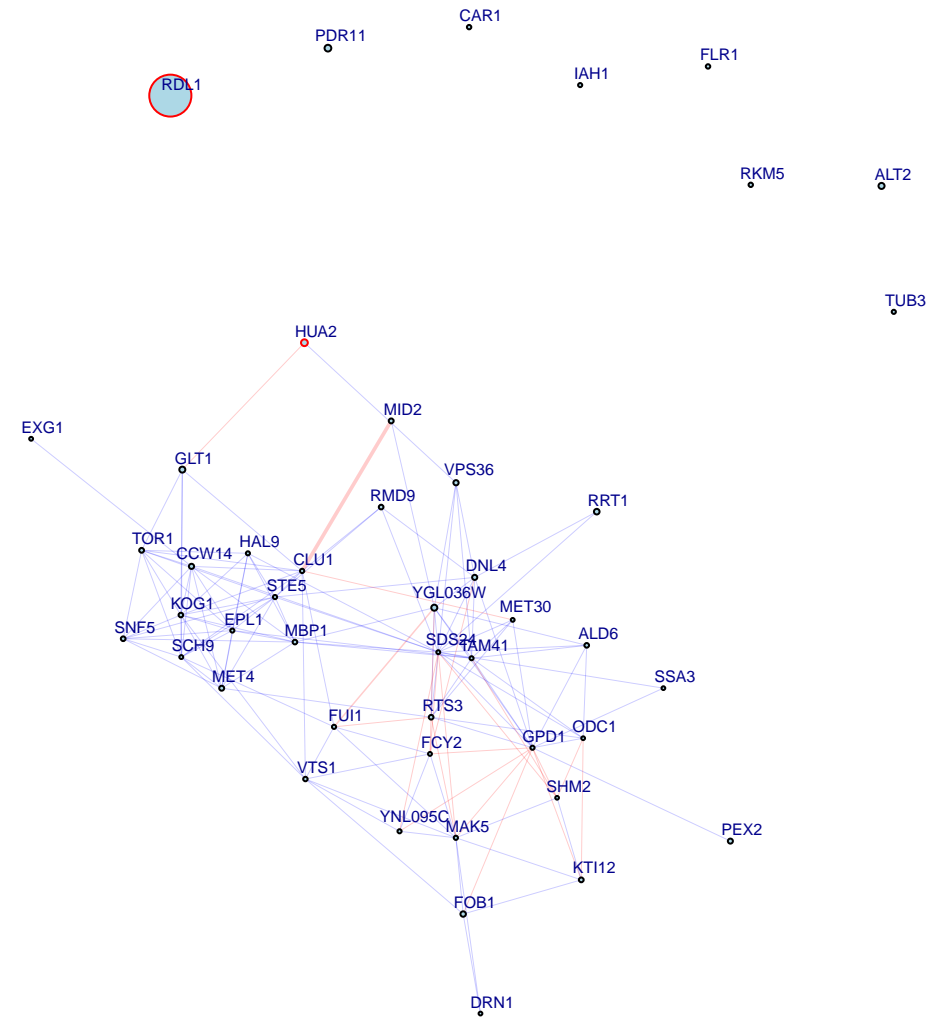

chrXV:845199\_G/A top 50 down genes

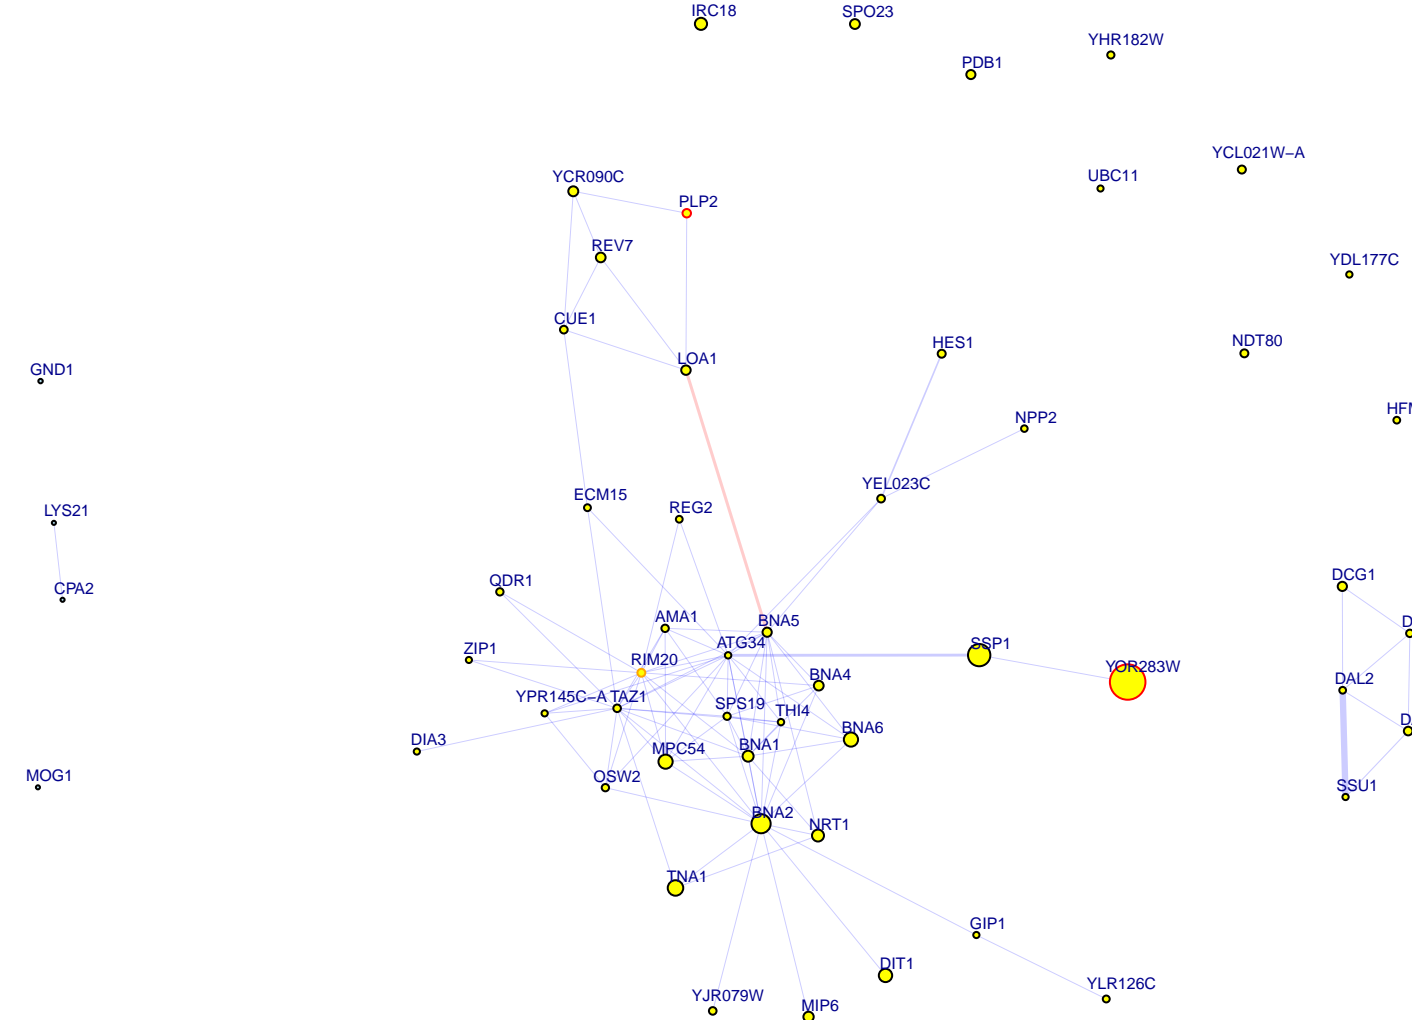

chrXV:845199\_G/A top 100 up and down genes

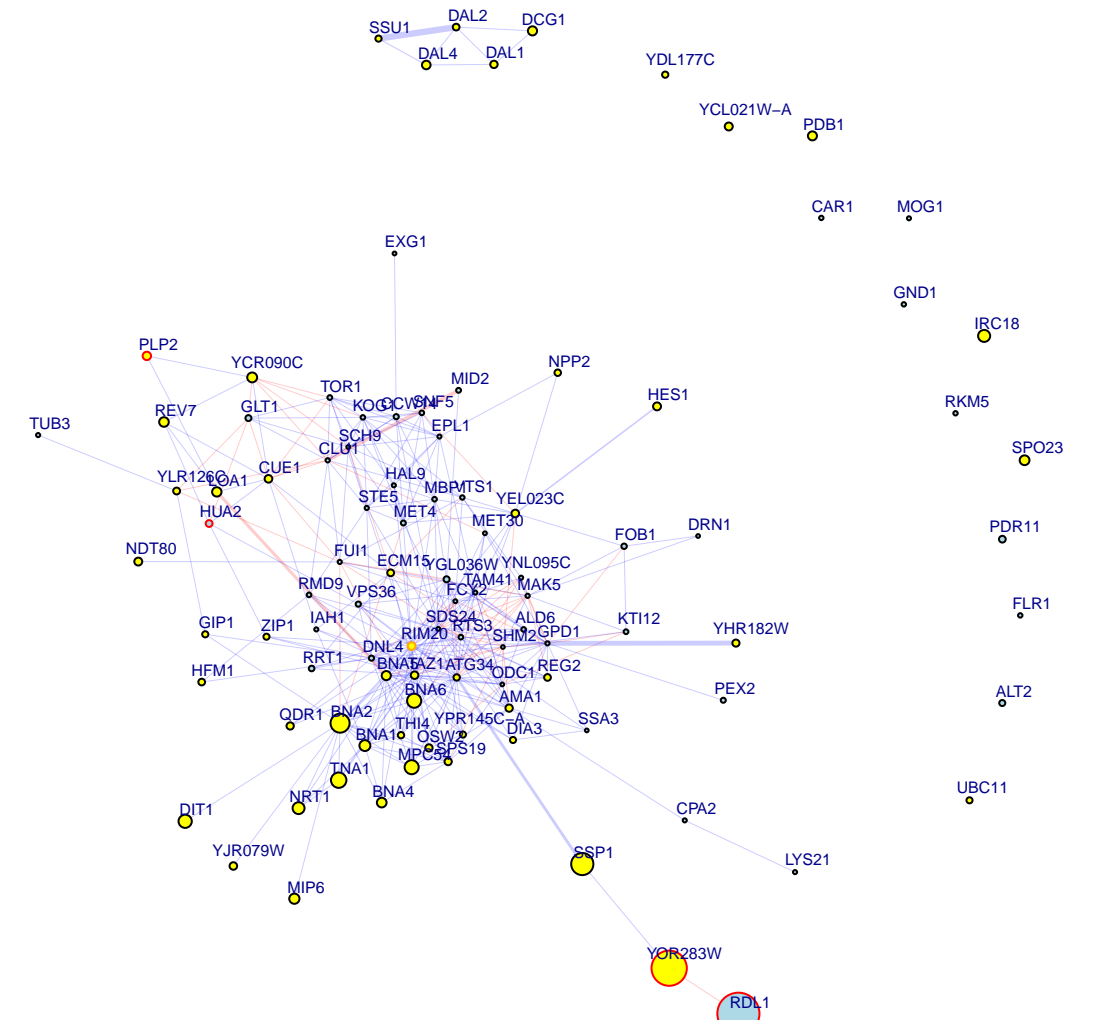

chrXV:958080\_T/A top 50 up genes

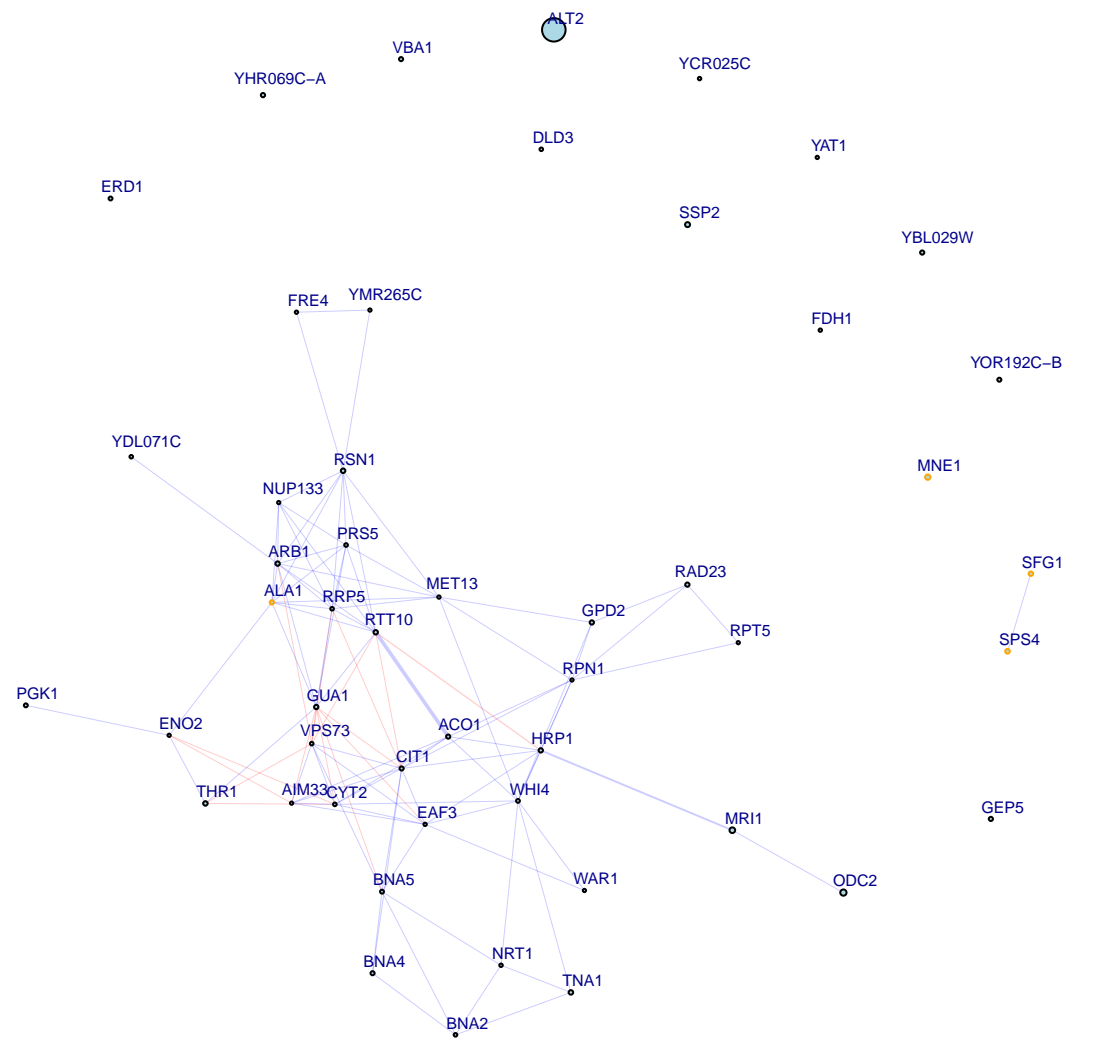

chrXV:958080\_T/A top 50 down genes

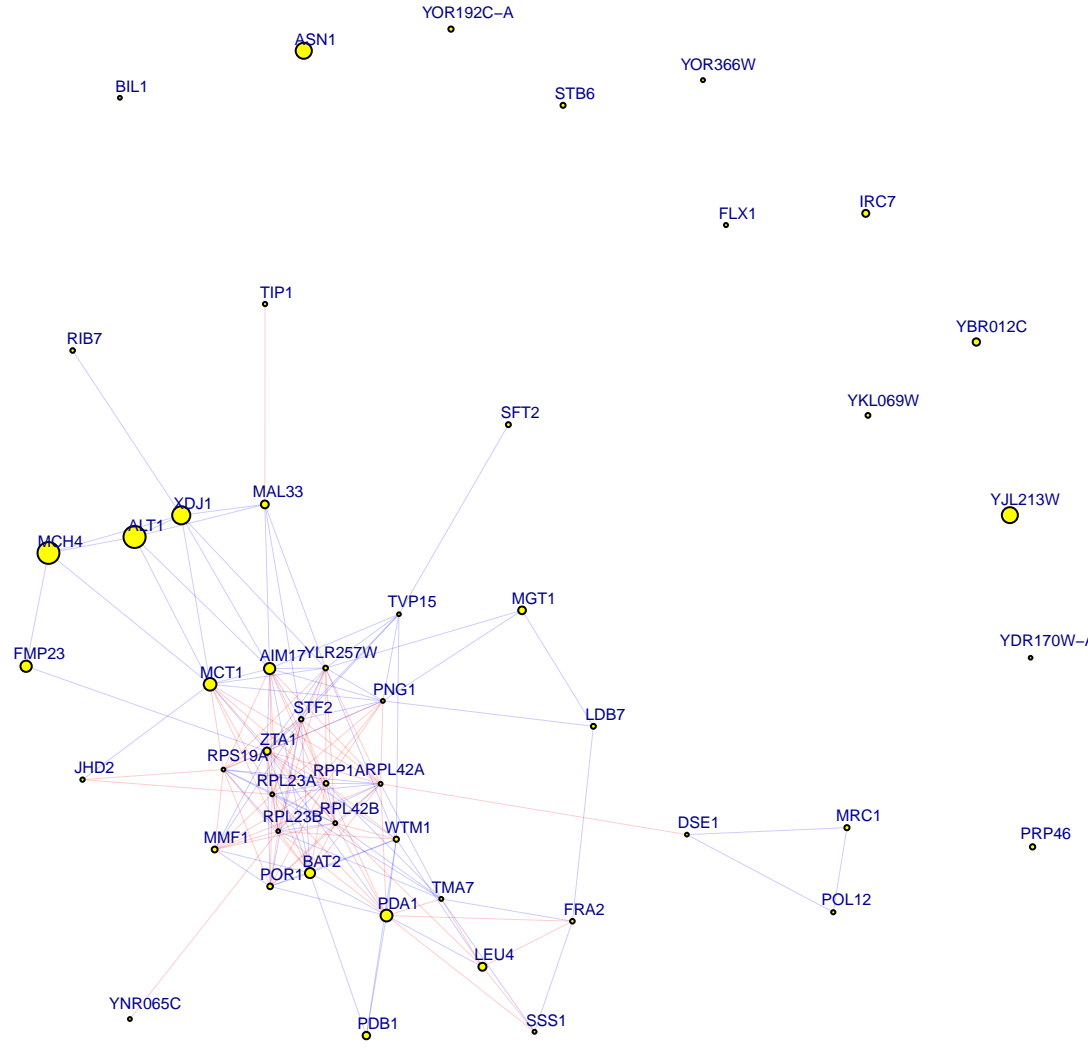

chrXV:958080\_T/A top 100 up and down genes

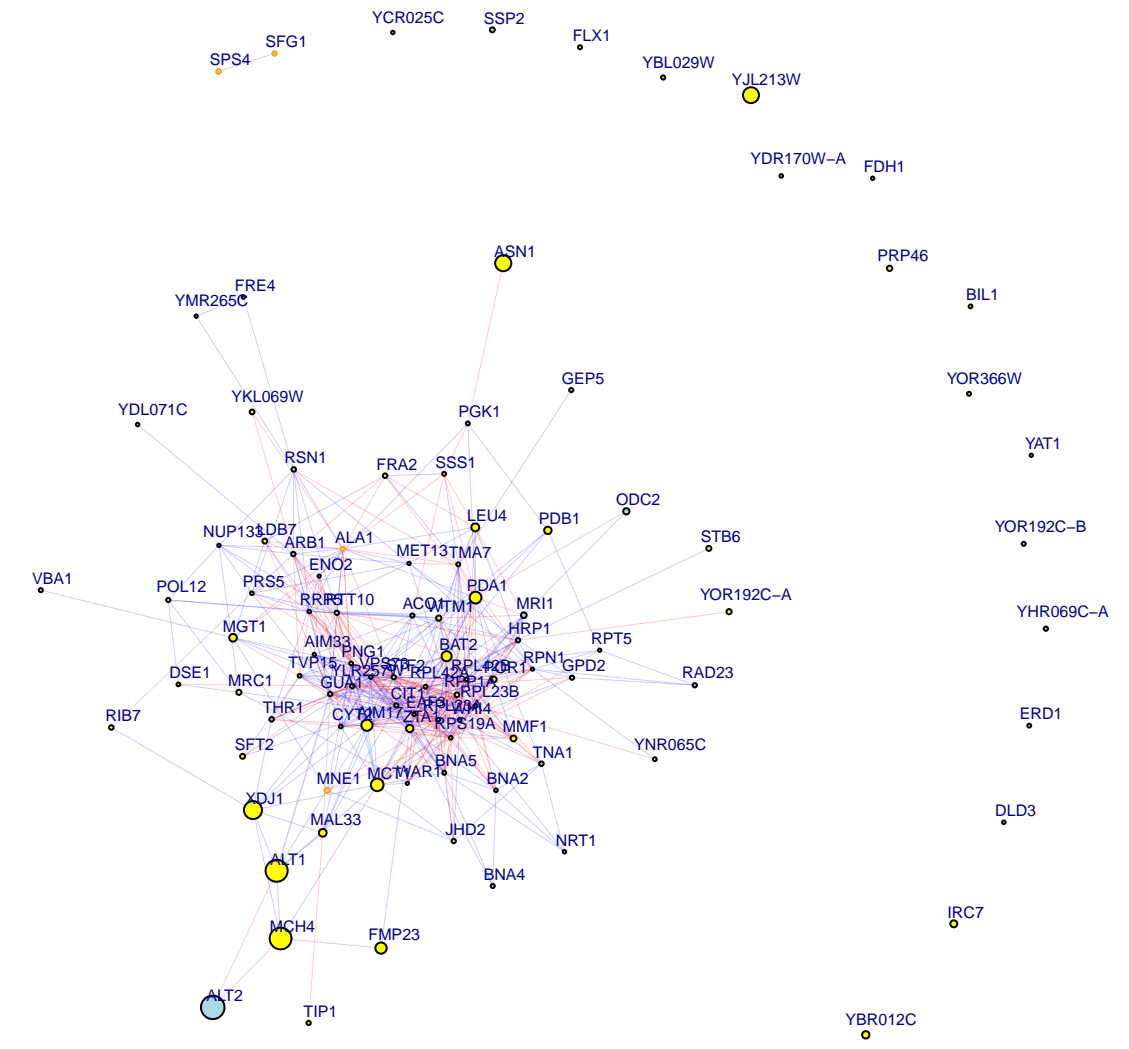

chrXV:1065815\_A/G top 50 up genes

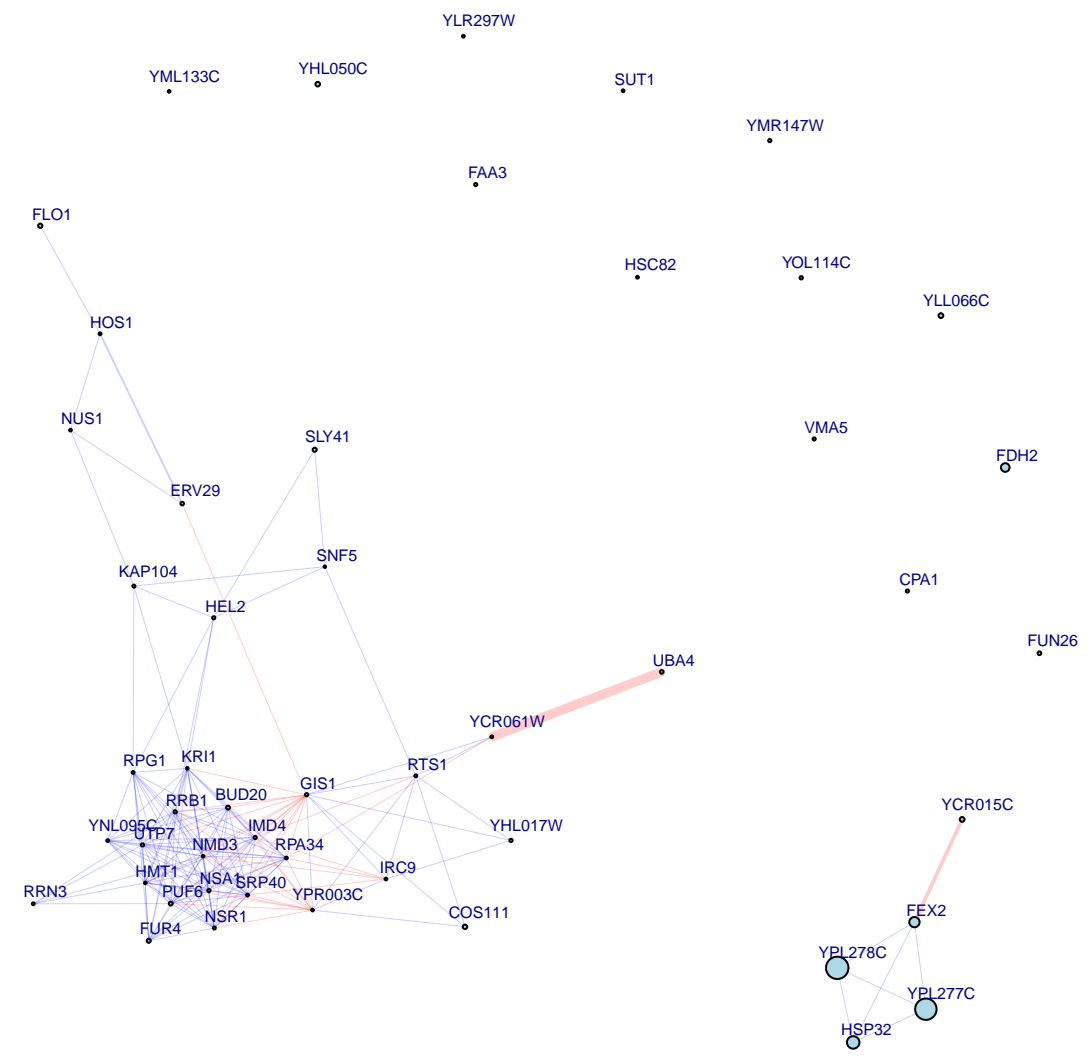

chrXV:1065815\_A/G top 50 down genes

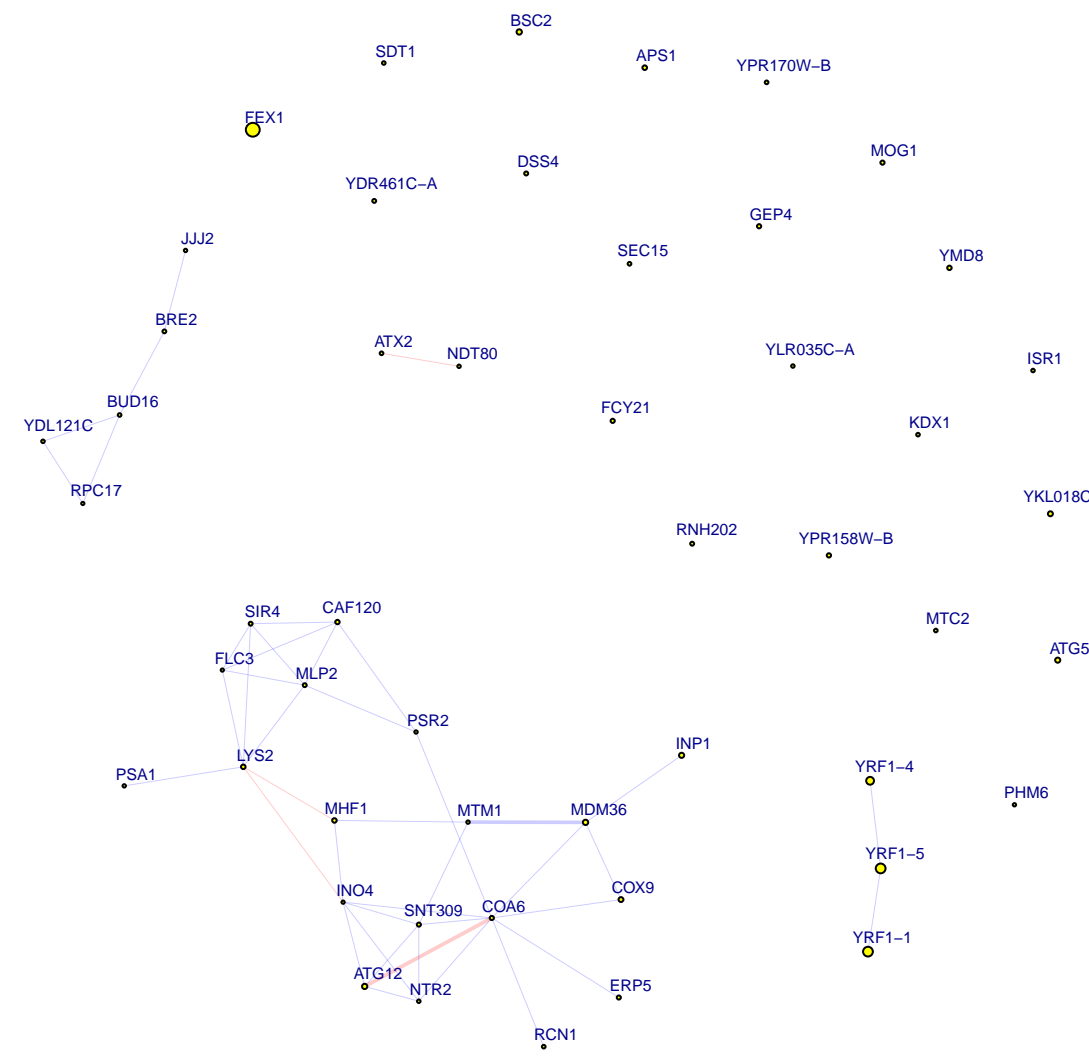

chrXV:1065815\_A/G top 100 up and down genes

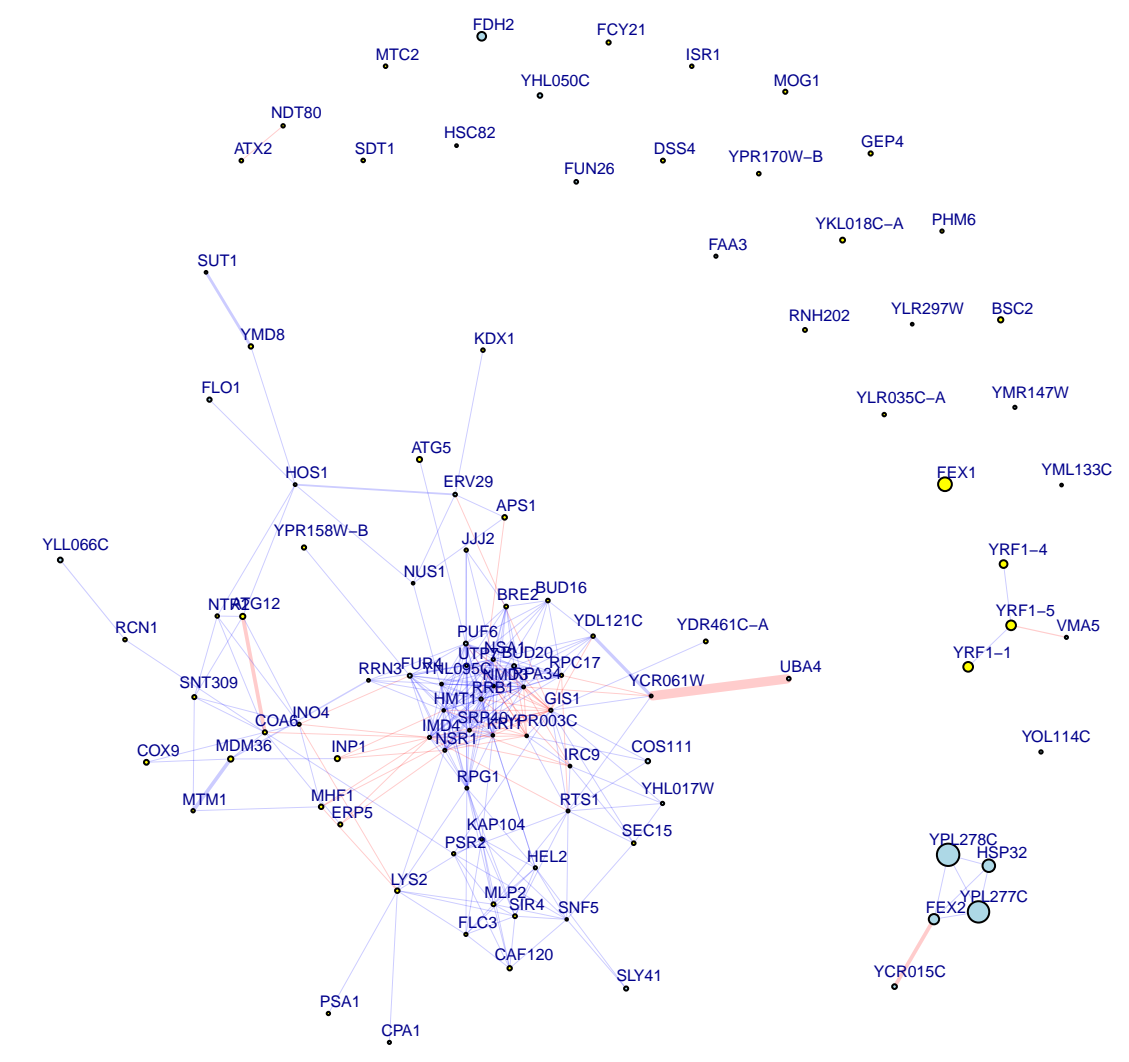





chrXVI:84945\_G/A top 50 up genes

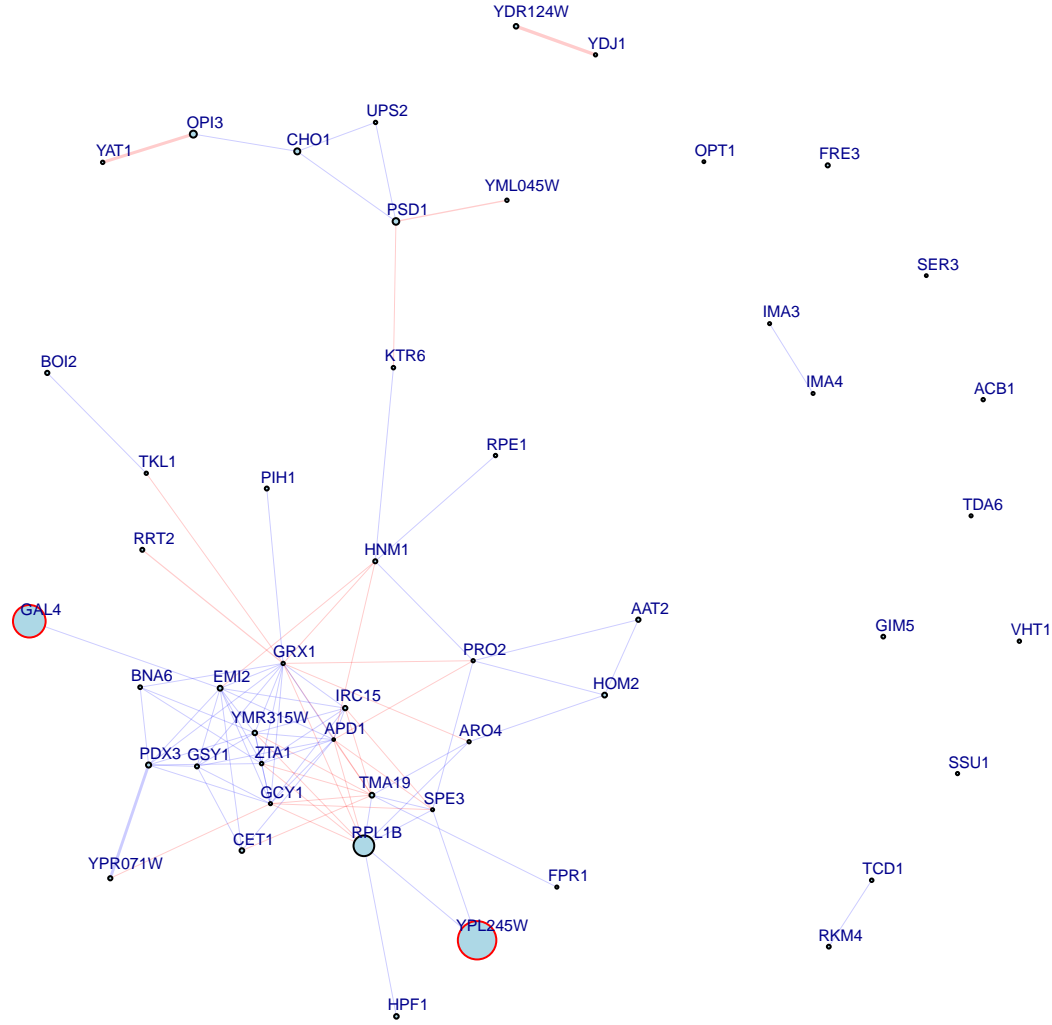

chrXVI:84945\_G/A top 50 down genes

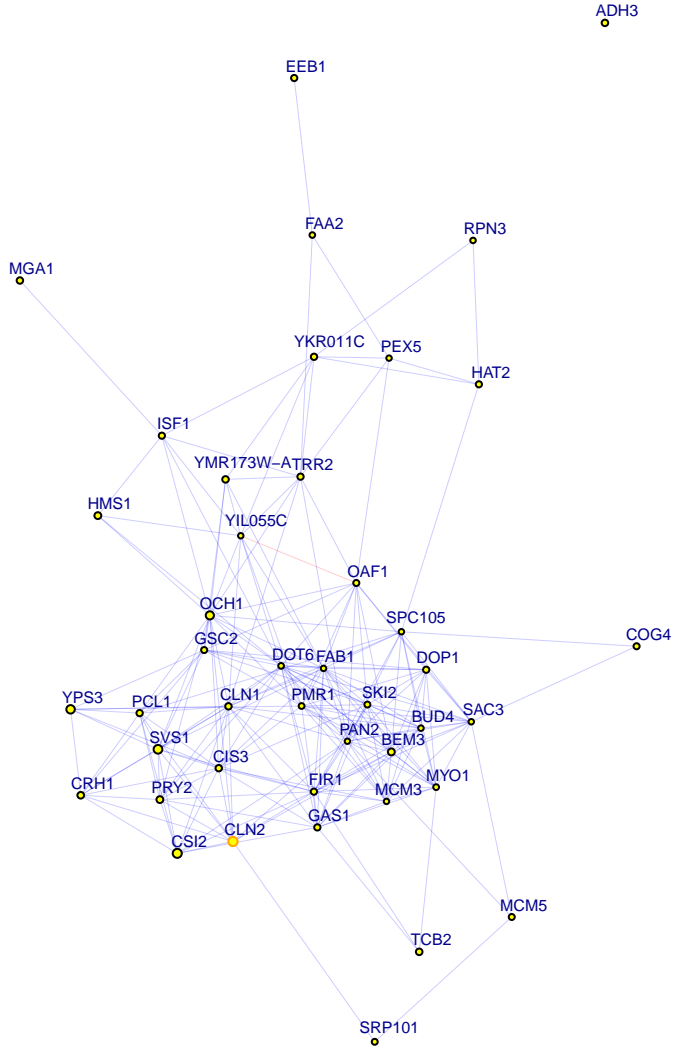

chrXVI:84945\_G/A top 100 up and down genes

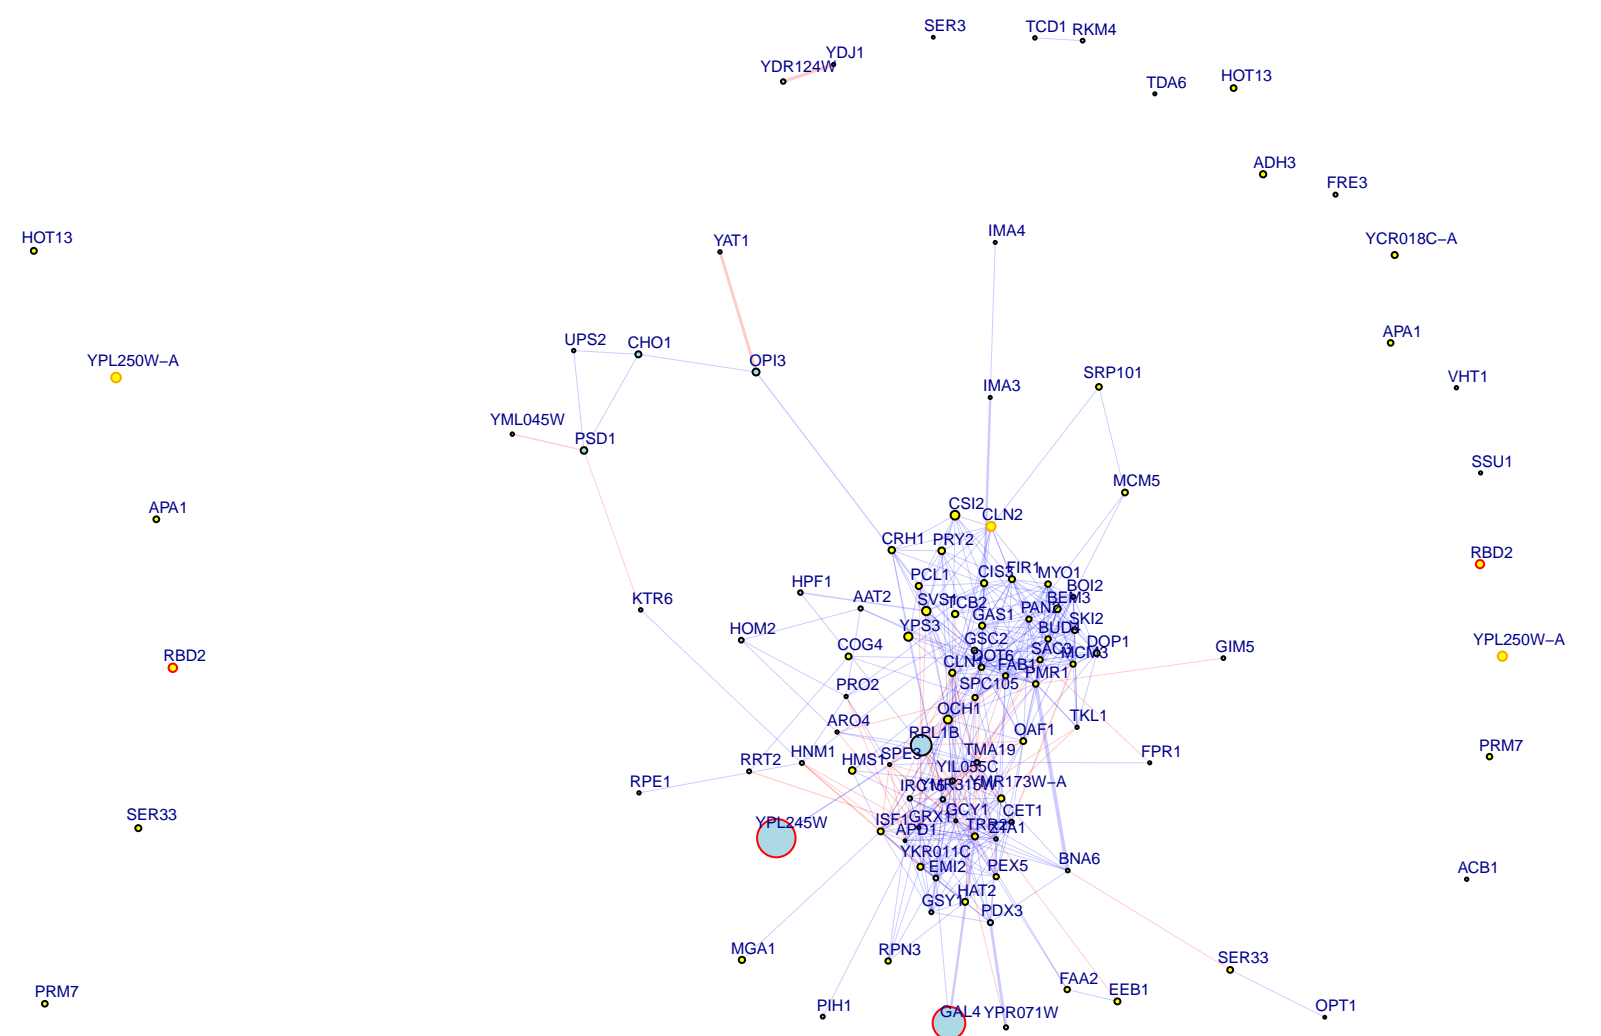

chrXVI:207364\_C/T top 50 up genes

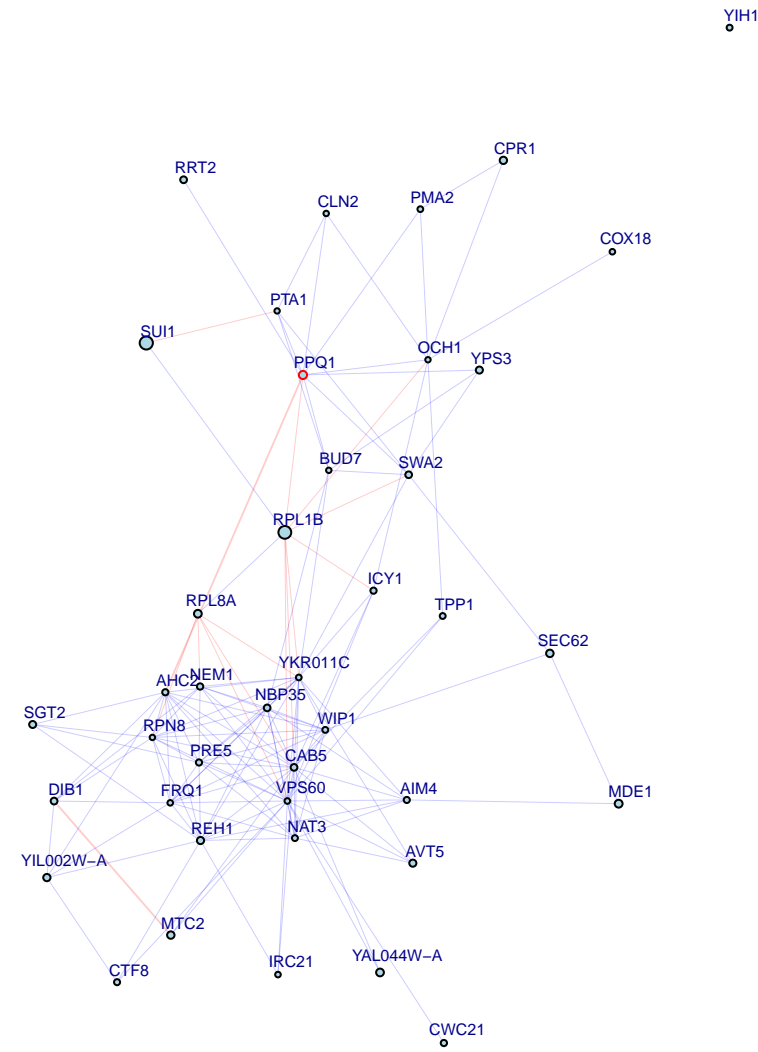

chrXVI:207364\_C/T top 50 down genes

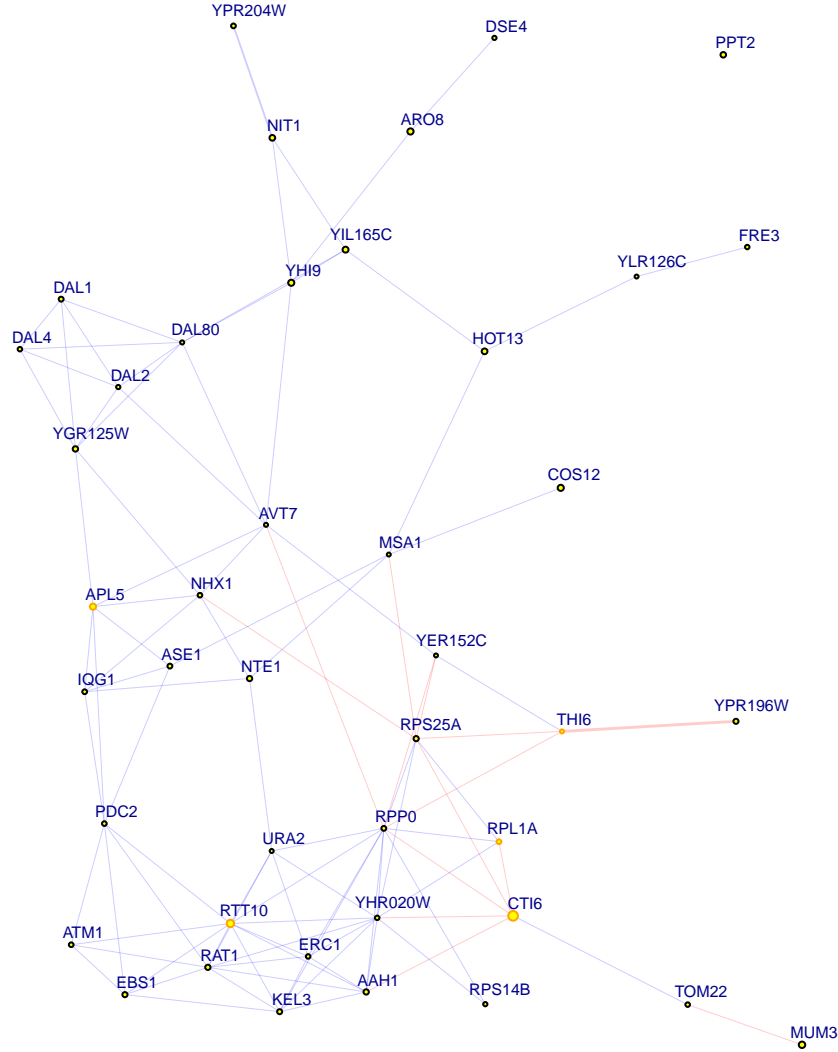

chrXVI:207364\_C/T top 100 up and down genes

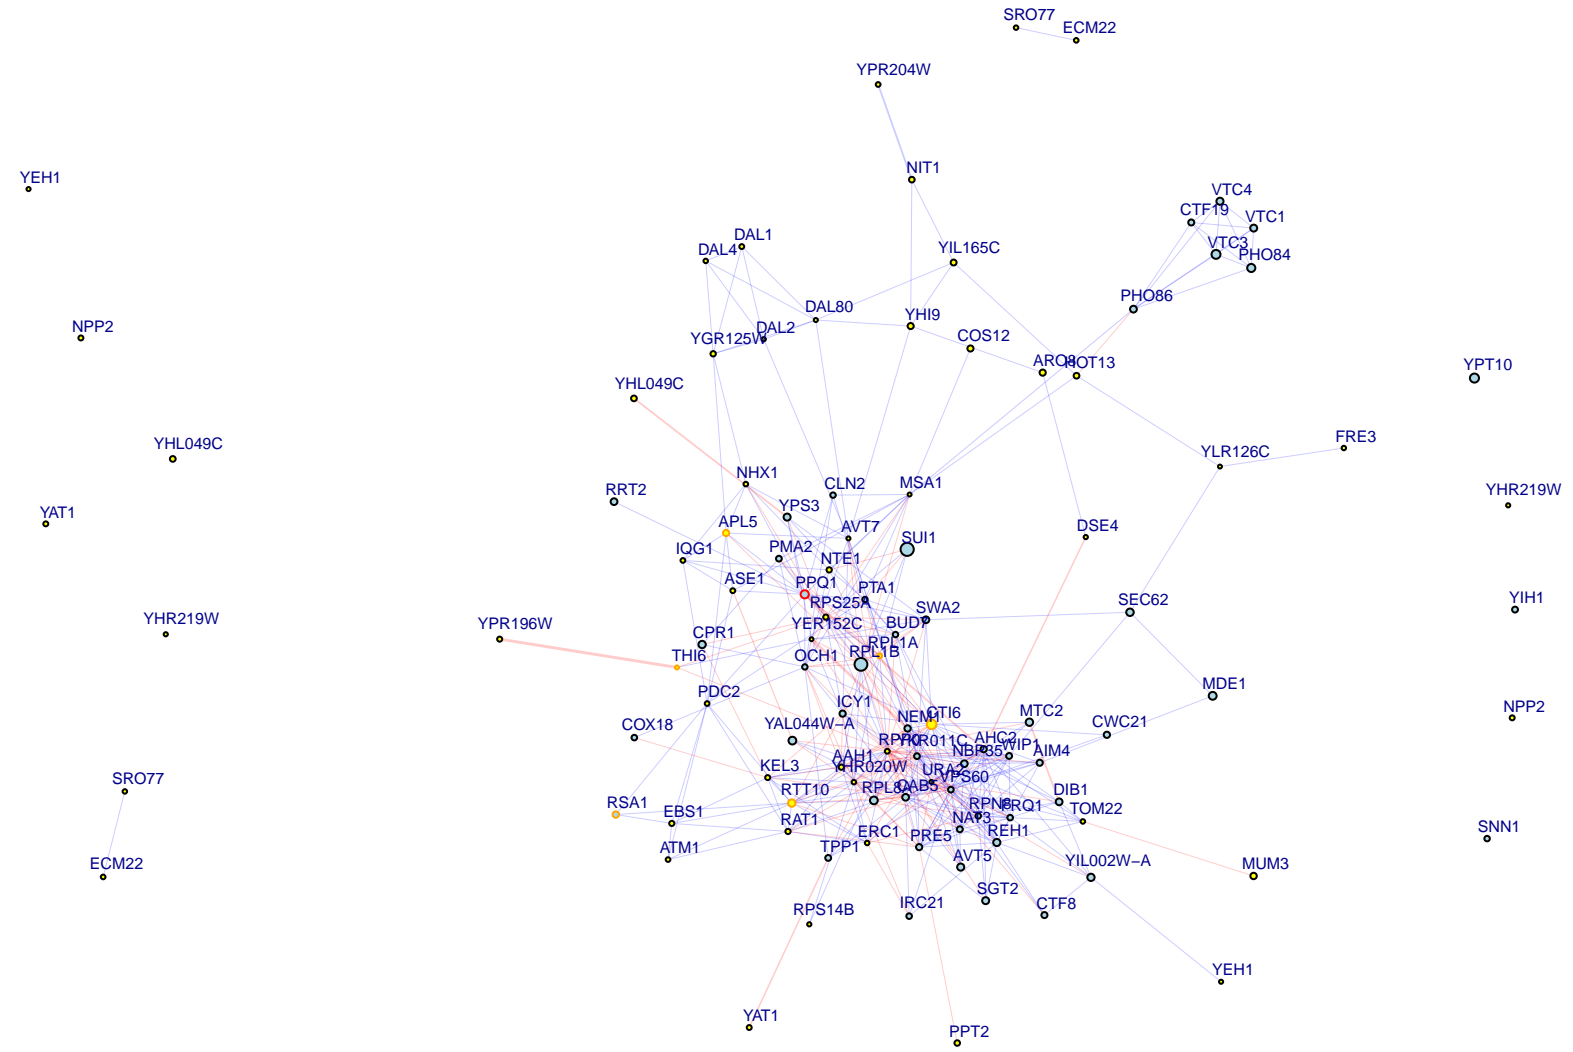

chrXVI:383928\_G/A top 50 up genes

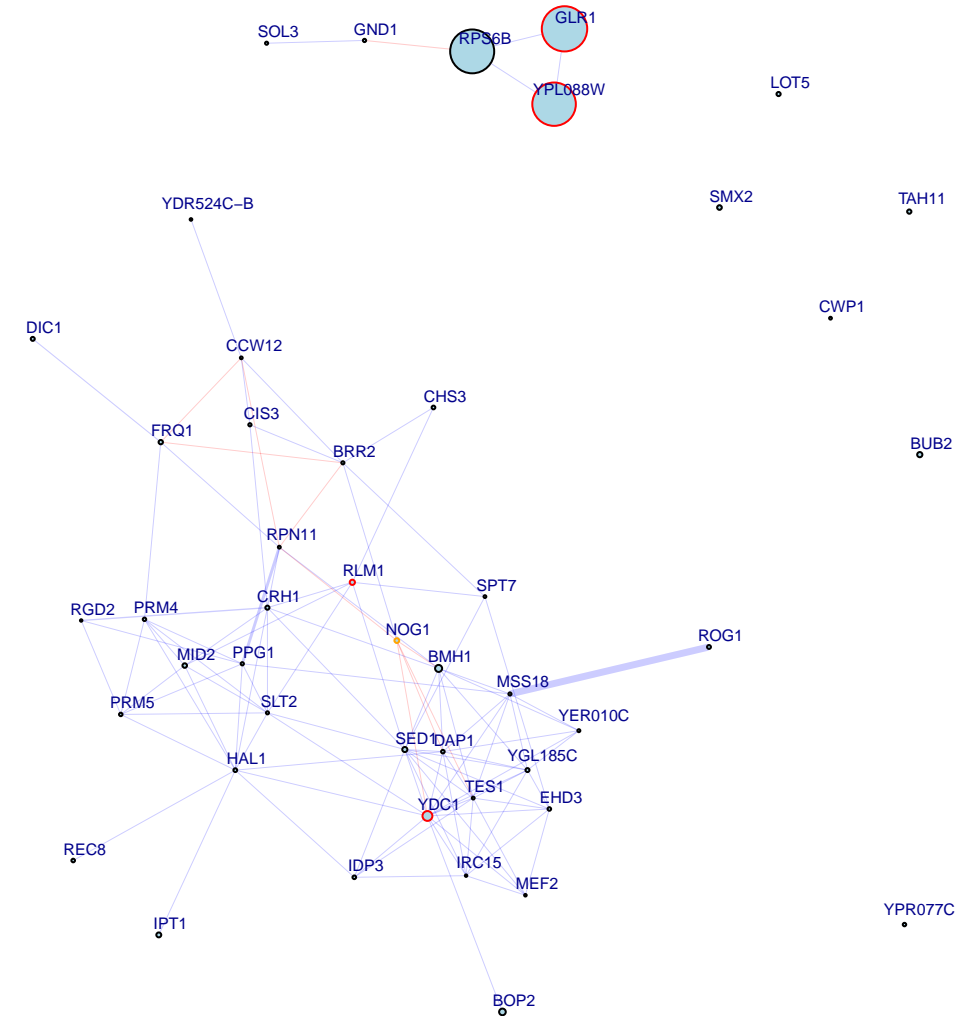

chrXVI:383928\_G/A top 50 down genes

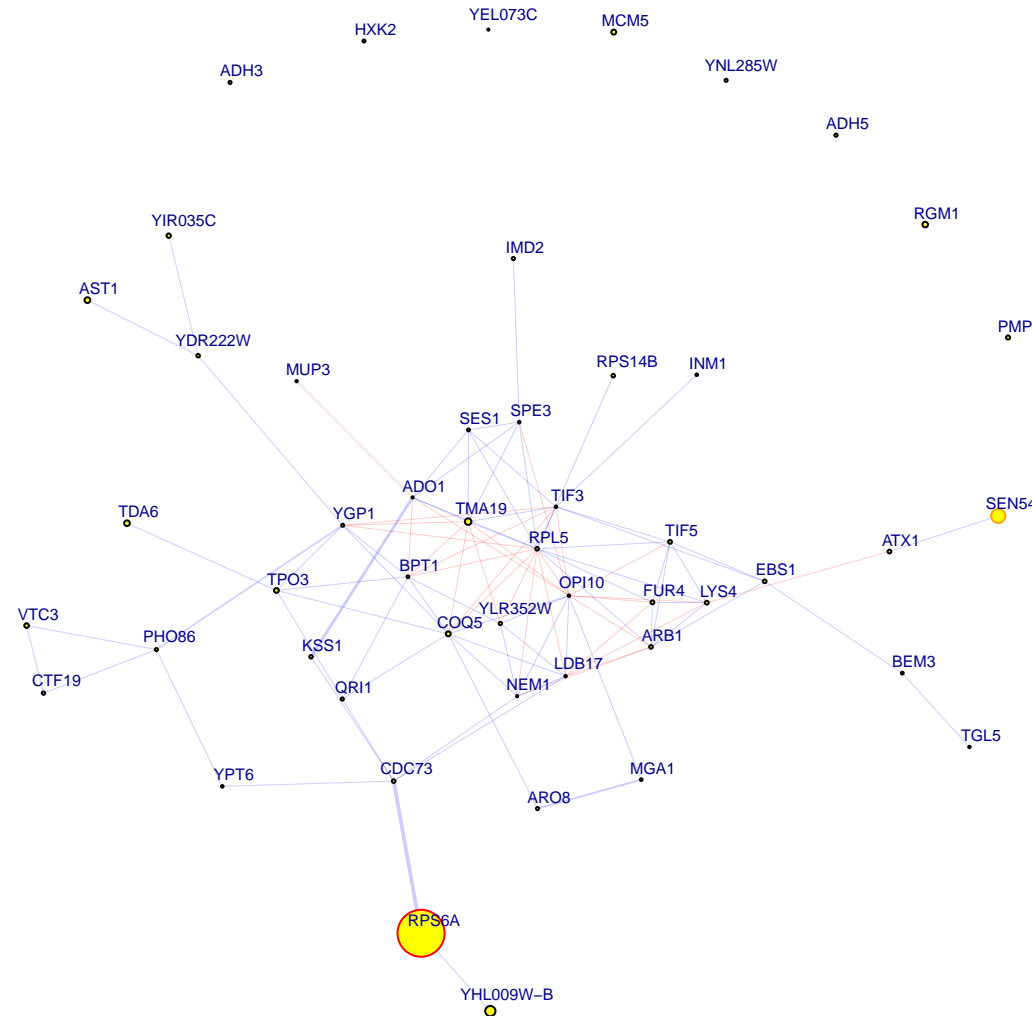

chrXVI:383928\_G/A top 100 up and down genes

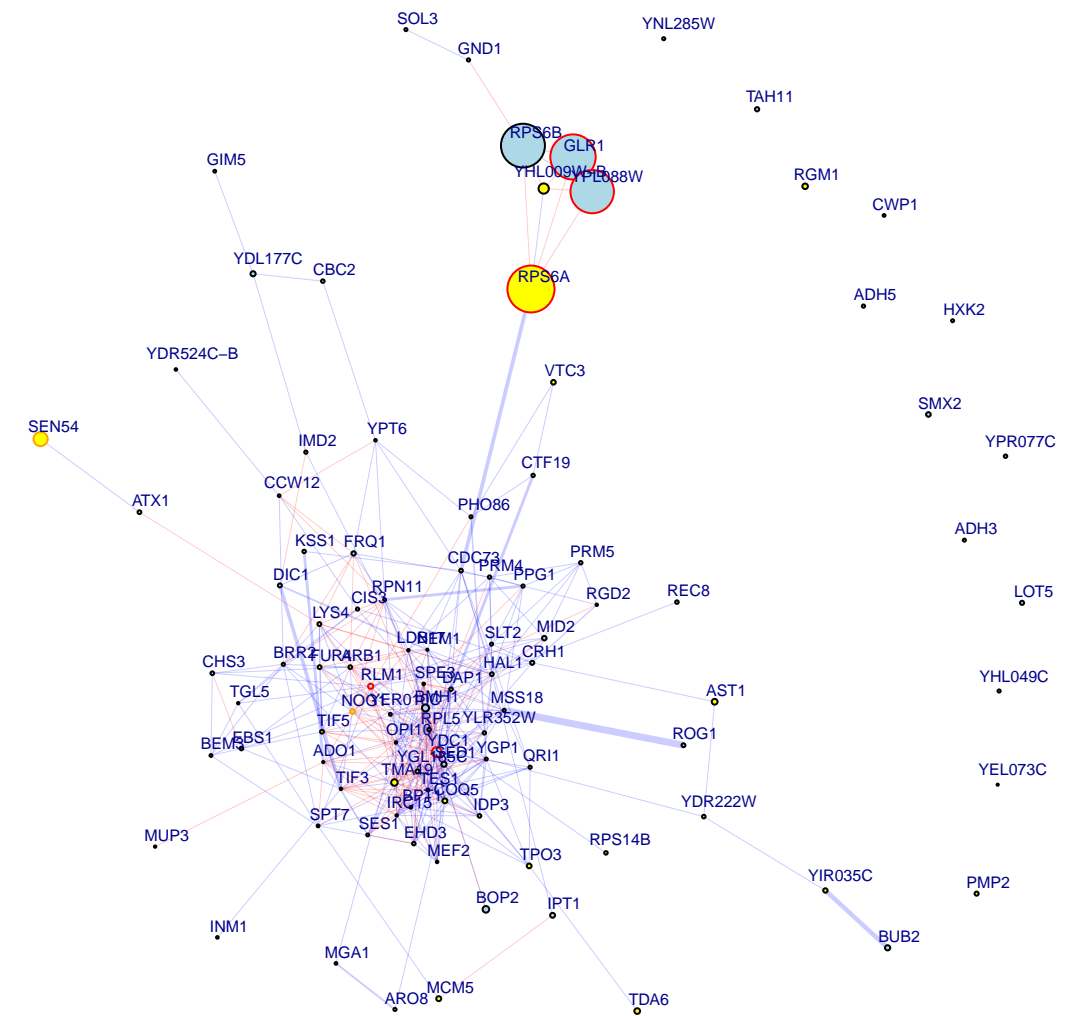

chrXVI:463543\_G/A top 50 up genes

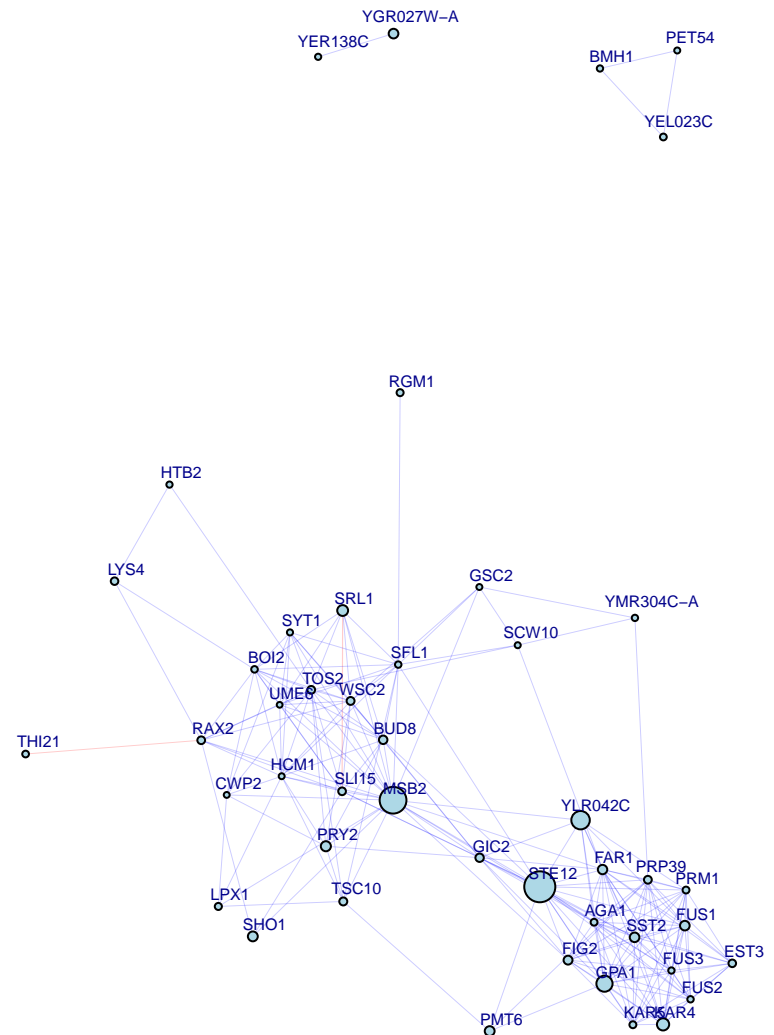

chrXVI:463543\_G/A top 50 down genes

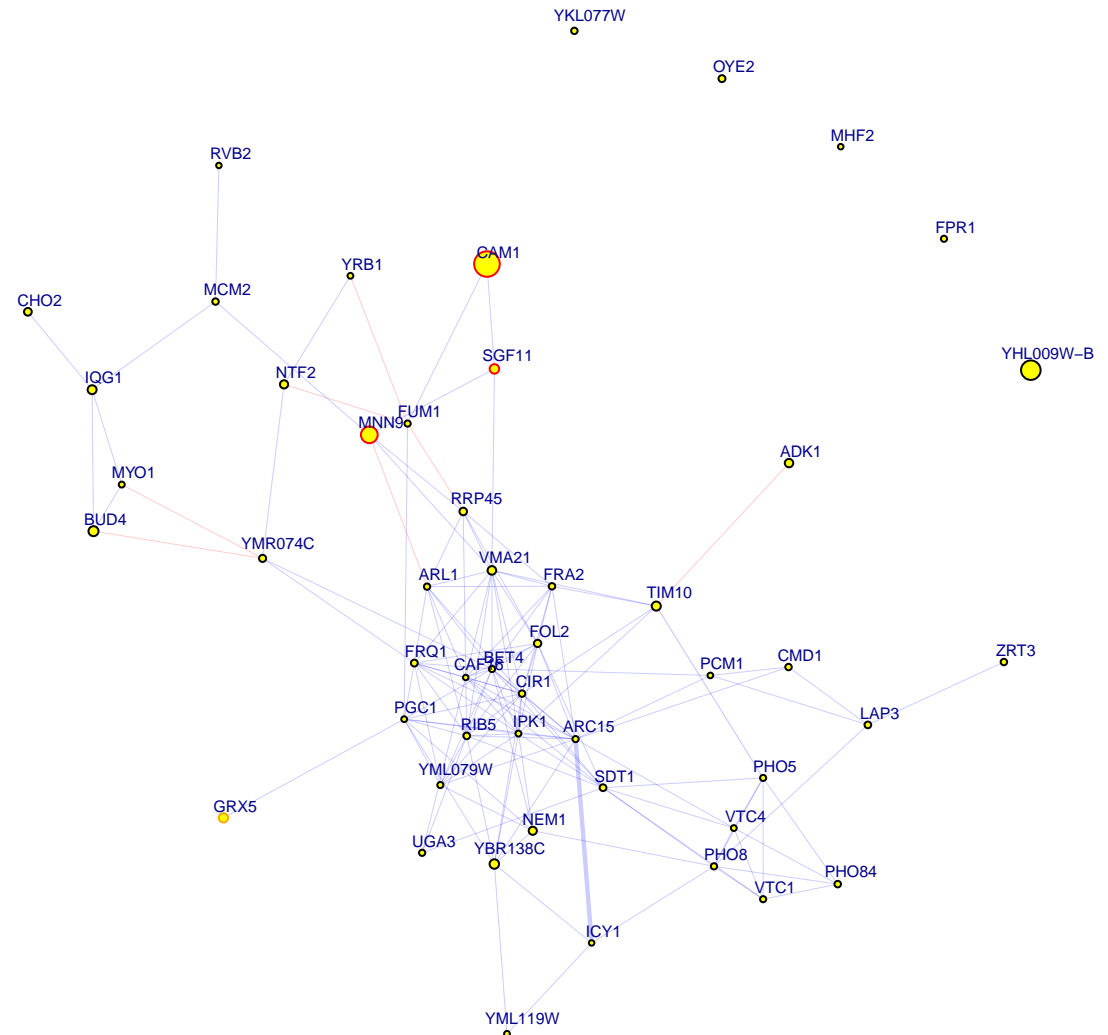

chrXVI:463543\_G/A top 100 up and down genes

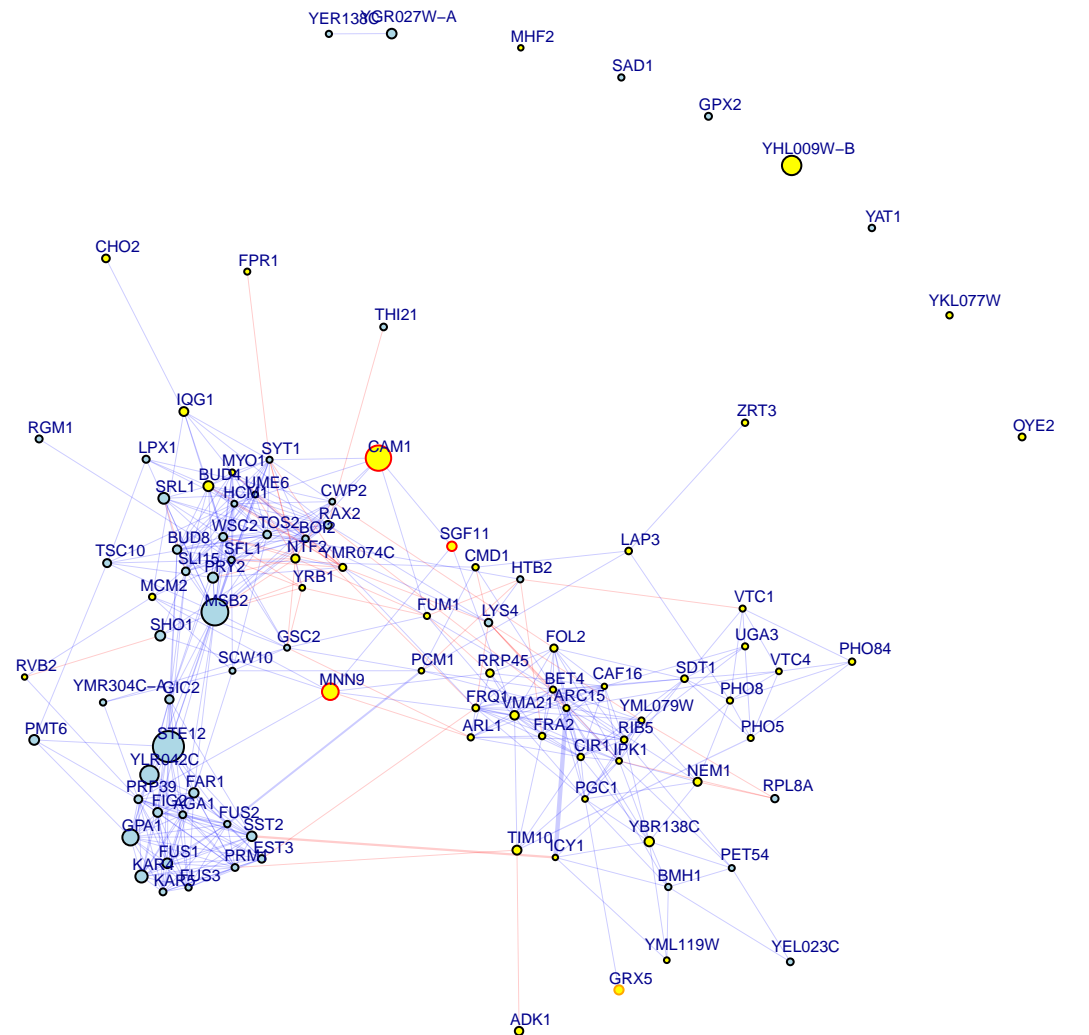

chrXVI:508199\_C/T top 50 up genes

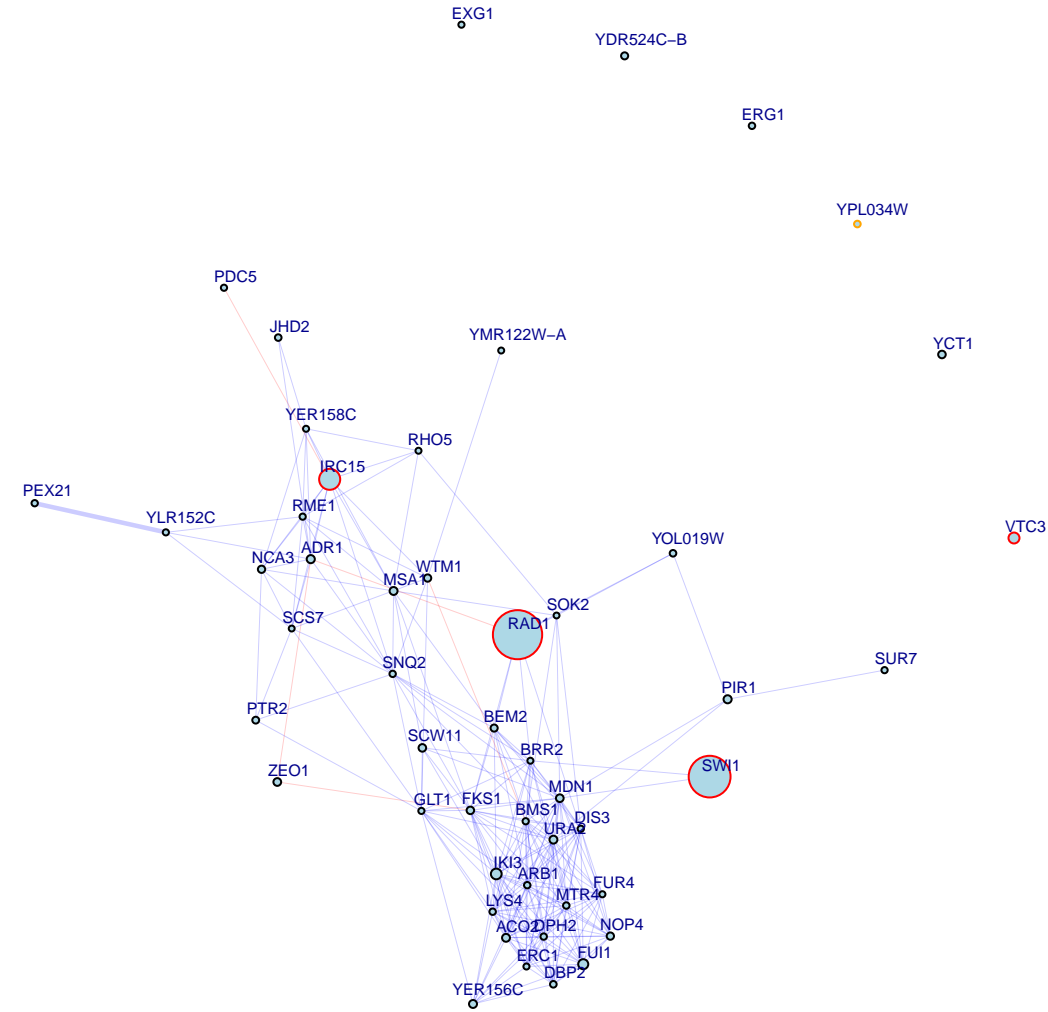

chrXVI:508199\_C/T top 50 down genes

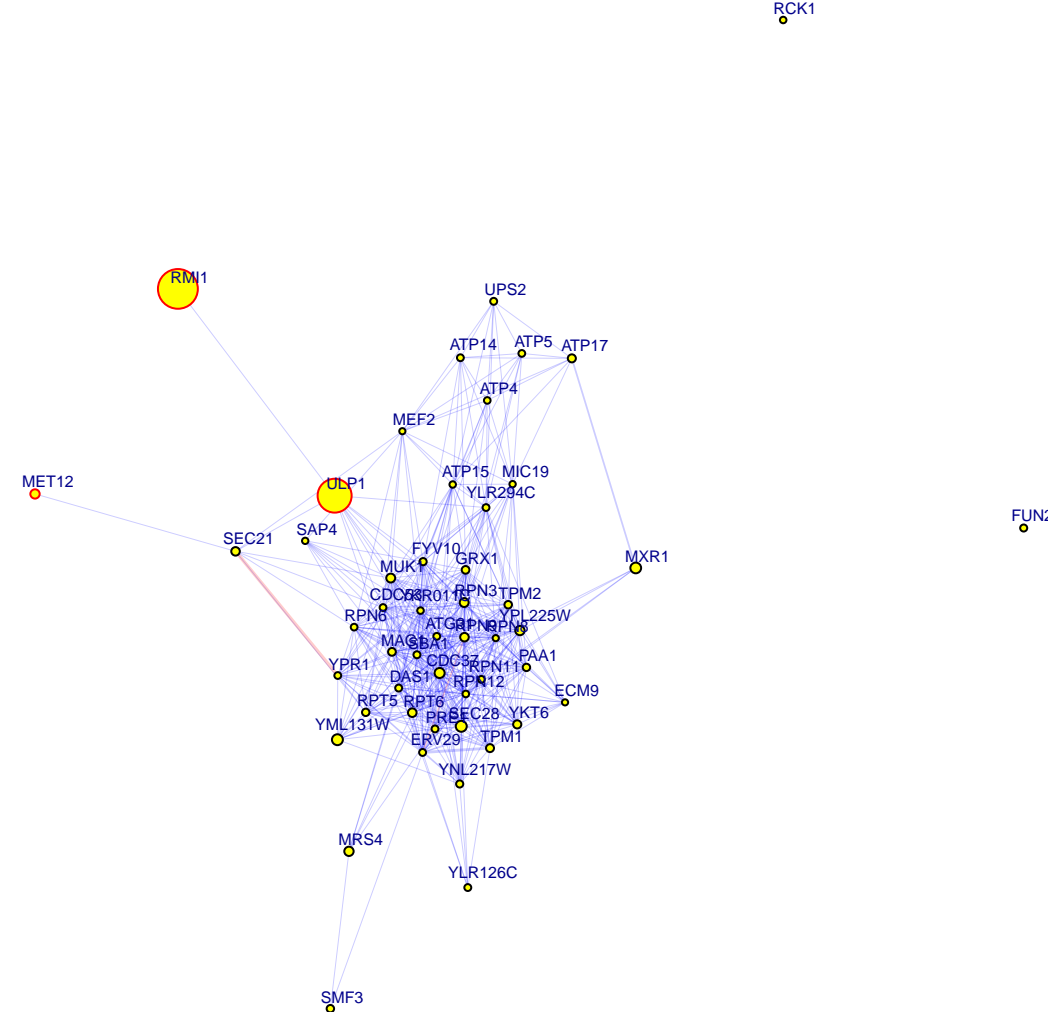

chrXVI:508199\_C/T top 100 up and down genes

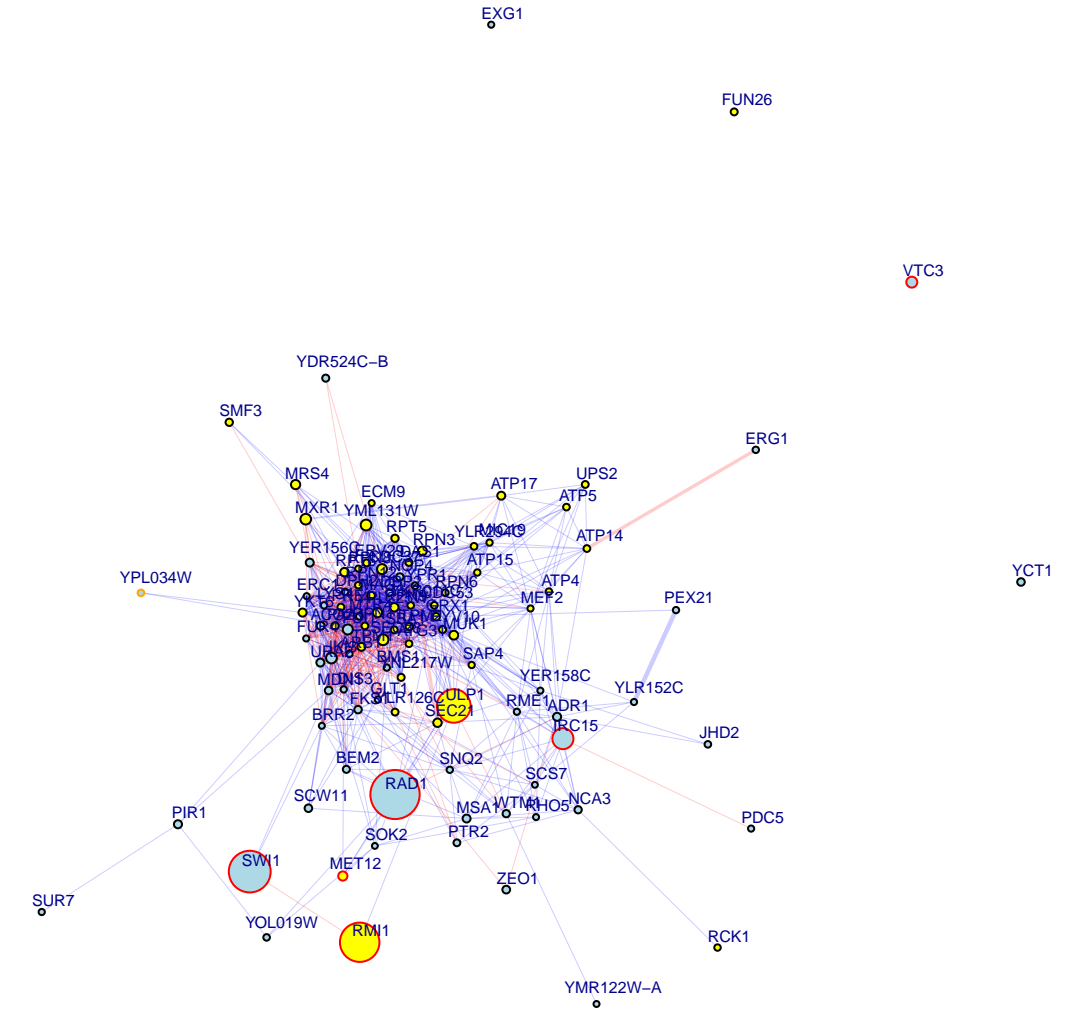

chrXVI:812990\_T/C top 50 up genes

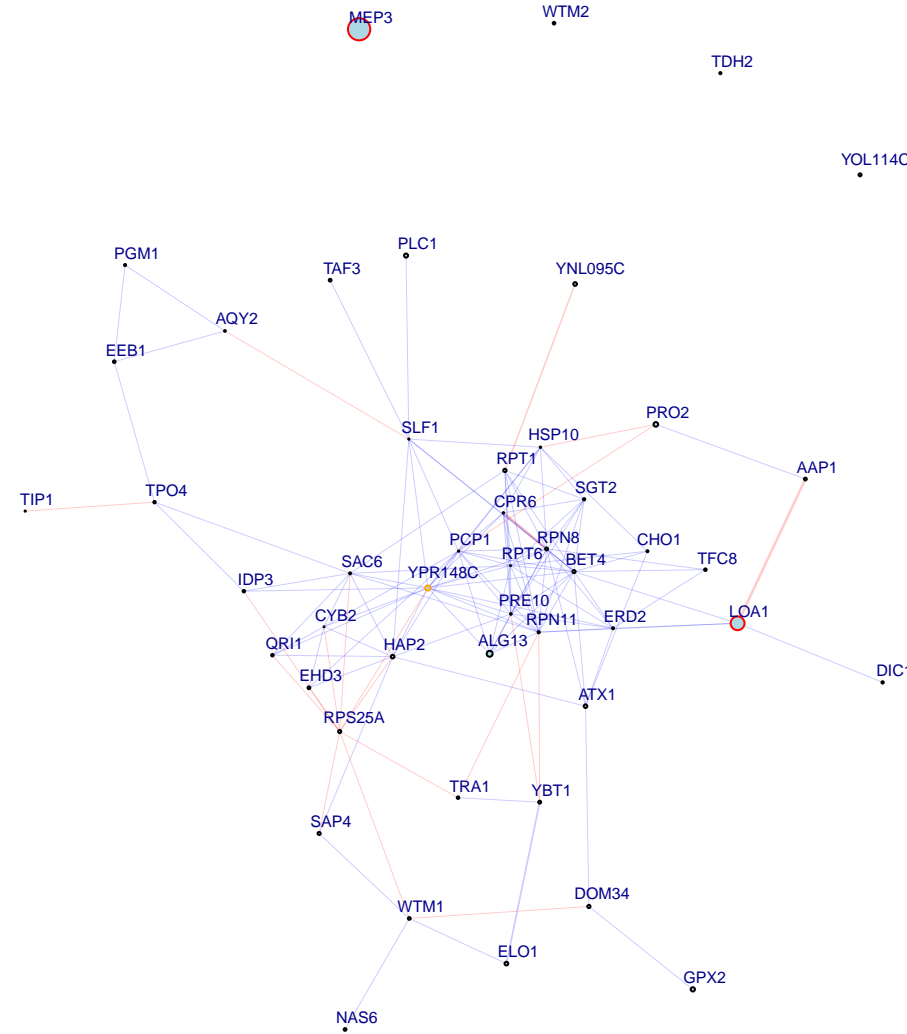

chrXVI:812990\_T/C top 50 down genes

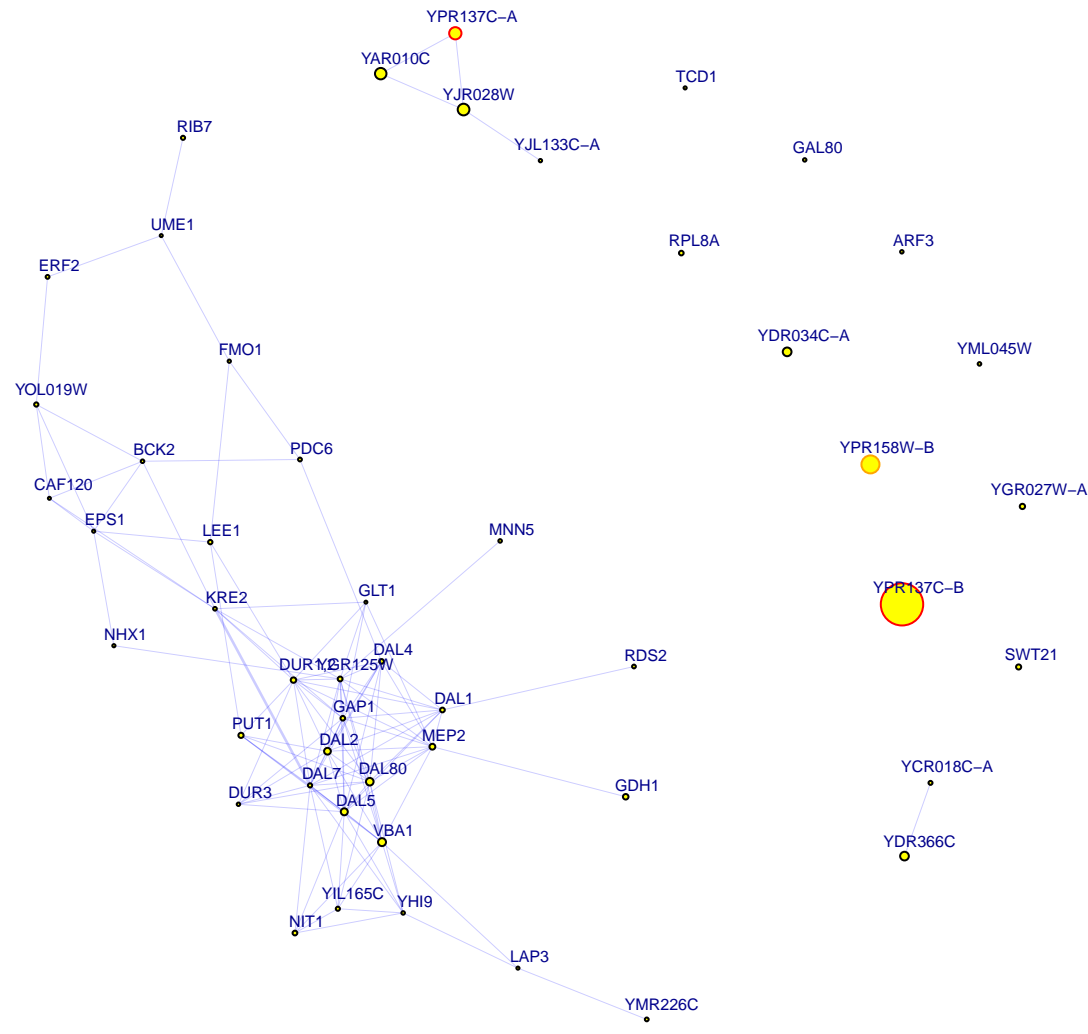

chrXVI:812990\_T/C top 100 up and down genes

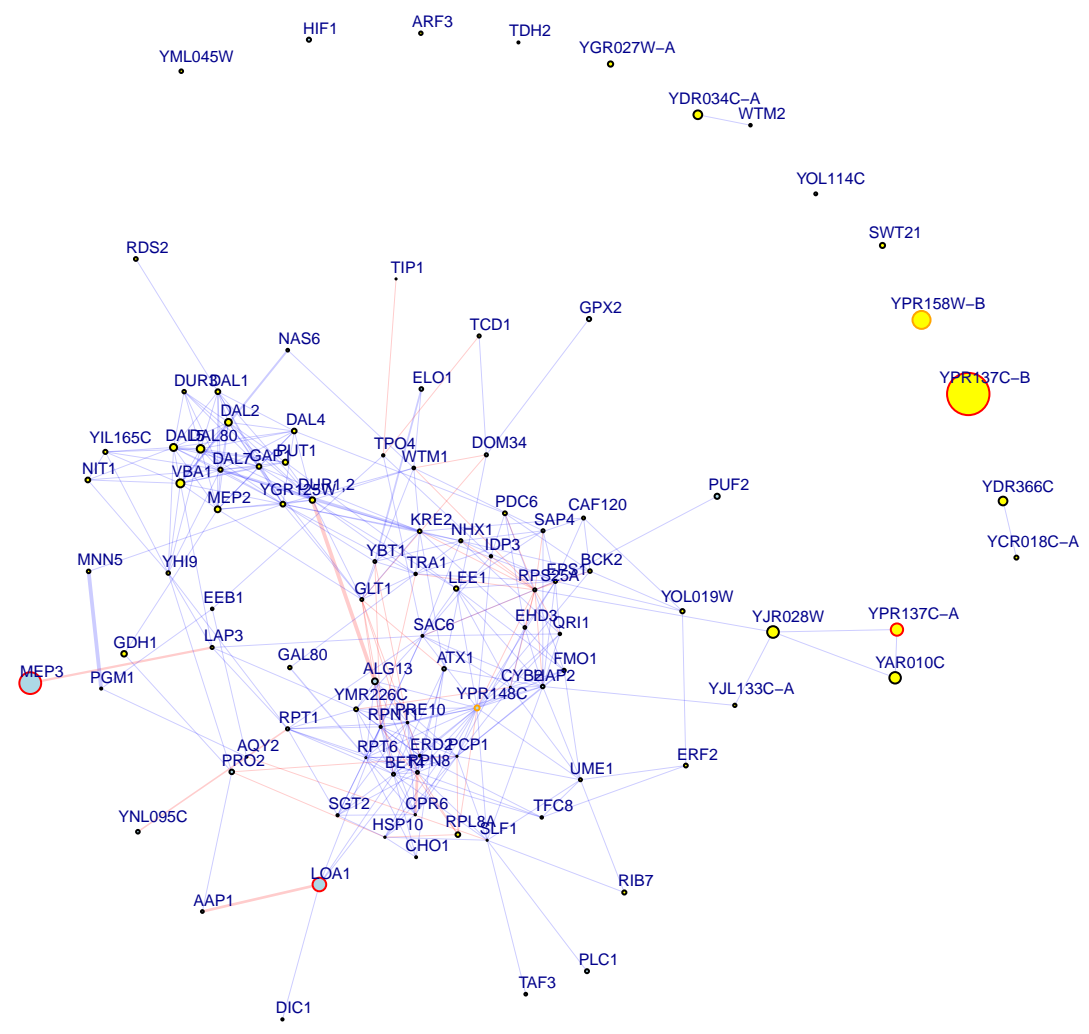

Supplement: elife-35471-supp6.pdf [file elife-35471-supp6.pdf]
